# Supplementary material for: Contribution of behavioural variability to representational drift
Source: eLife journal article supplement (doi:10.7554/elife.77907), 2022-08-30
Supplement: supp [file elife-77907-supp-v1.zip]

Archive with 27 entries (27 files):
- elife_poa_e77907_Figure_1_figure_supplement_1.pdf
- elife_poa_e77907_Figure_1_figure_supplement_2.pdf
- elife_poa_e77907_Figure_1_figure_supplement_3.pdf
- elife_poa_e77907_Figure_1_figure_supplement_4.pdf
- elife_poa_e77907_Figure_1_figure_supplement_5.pdf
- elife_poa_e77907_Figure_2_figure_supplement_1.pdf
- elife_poa_e77907_Figure_2_figure_supplement_2.pdf
- elife_poa_e77907_Figure_2_figure_supplement_3.pdf
- elife_poa_e77907_Figure_3_figure_supplement_1.pdf
- elife_poa_e77907_Figure_3_figure_supplement_2.pdf
- elife_poa_e77907_Figure_4_figure_supplement_1.pdf
- elife_poa_e77907_Figure_4_figure_supplement_2.pdf
- elife_poa_e77907_Figure_4_figure_supplement_3.pdf
- elife_poa_e77907_Figure_4_figure_supplement_4.pdf
- elife_poa_e77907_Figure_4_figure_supplement_5.pdf
- elife_poa_e77907_Figure_5_figure_supplement_1.pdf
- elife_poa_e77907_Figure_5_figure_supplement_2.pdf
- elife_poa_e77907_Figure_5_figure_supplement_3.pdf
- elife_poa_e77907_Figure_7_figure_supplement_1.pdf
- elife_poa_e77907_Figure_7_figure_supplement_2.pdf
- elife_poa_e77907_Figure_1_source_data_1.xls
- elife_poa_e77907_Figure_2_source_data_1.xls
- elife_poa_e77907_Figure_4_source_data_1.xls
- elife_poa_e77907_Figure_6_source_data_1.xls
- elife_poa_e77907_Supplementary_file_1.docx
- elife_poa_e77907_Transparent_Reporting_File.docx
- elife_poa_e77907_Source_code_1.zip
