# Supplementary material for: Contribution of behavioural variability to representational drift
Source: eLife journal article supplement (doi:10.7554/elife.77907), 2022-08-30

Neuropixels dataset1

Neuropixels dataset2

**a**

Z-scored activity

V1 units

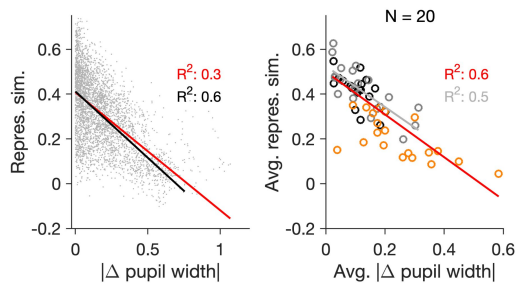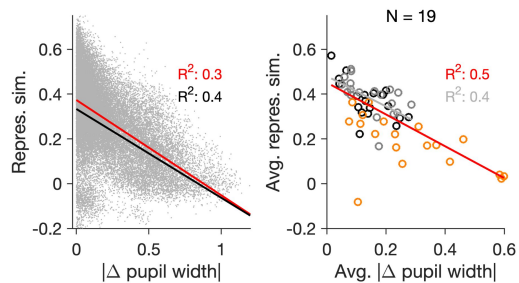

All units

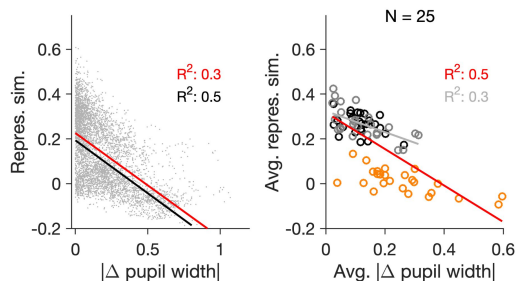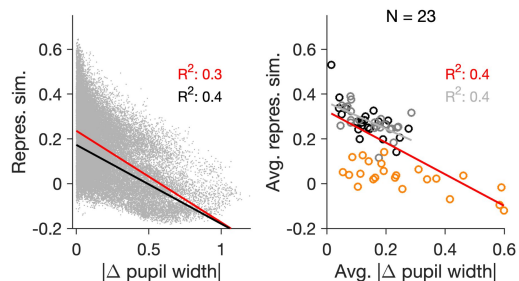**b**

Activity rendered in time bins of 2 seconds

V1 units

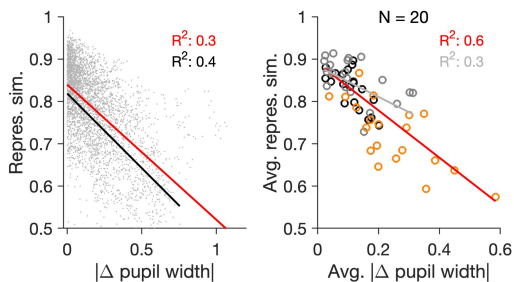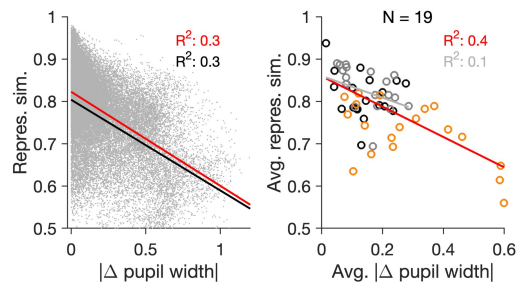

All units

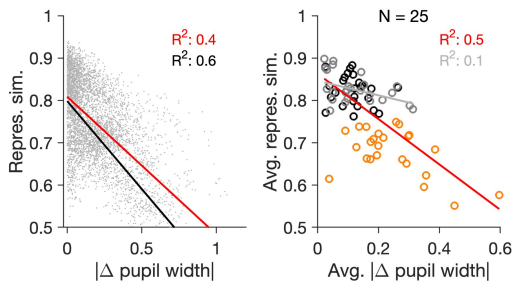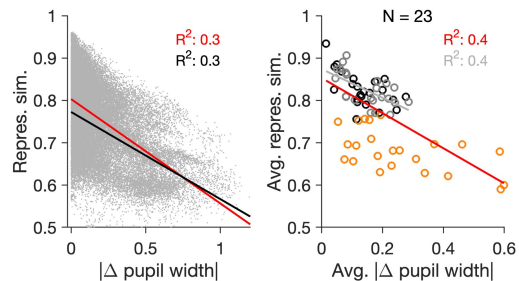

Supplement: supp [file elife-77907-supp-v1.zip › elife_poa_e77907_Figure_1_figure_supplement_3.pdf]
