# Supplementary material for: Contribution of behavioural variability to representational drift
Source: eLife journal article supplement (doi:10.7554/elife.77907), 2022-08-30
Supplement: supp [file elife-77907-supp-v1.zip › elife_poa_e77907_Figure_1_figure_supplement_4.pdf]

Neuropixels dataset1

Neuropixels dataset2

WT mice only

V1 units

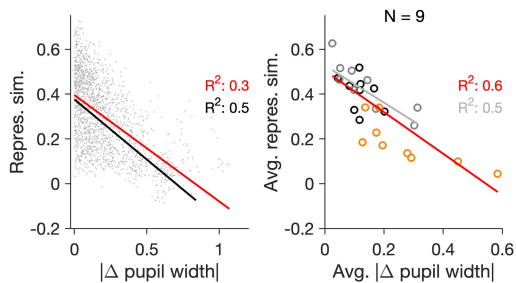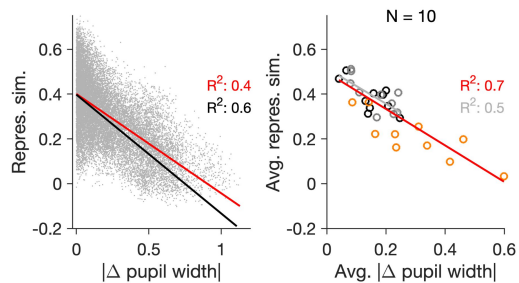

All units

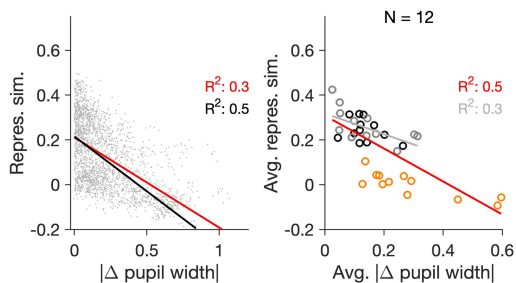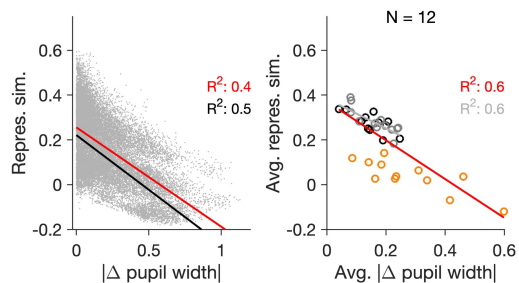

b

Female

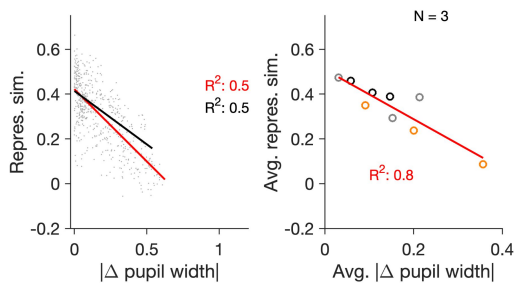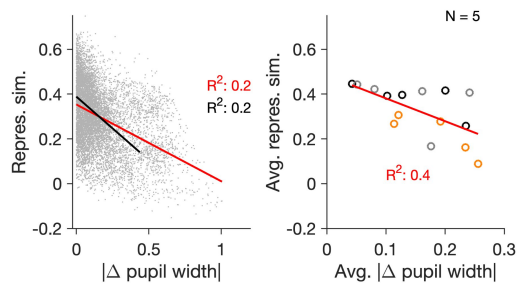

Male

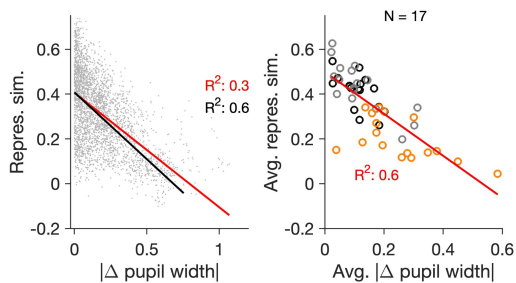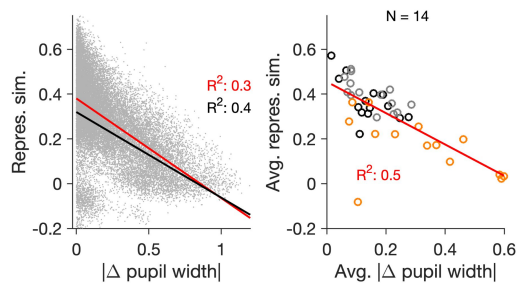

Primary visual cortex
