# Supplementary material for: Contribution of behavioural variability to representational drift
Source: eLife journal article supplement (doi:10.7554/elife.77907), 2022-08-30
Supplement: supp [file elife-77907-supp-v1.zip › elife_poa_e77907_Figure_1_source_data_1.xls]

## Sheet: functional_connectivity
Session ID:	766640955		Session ID:	767871931		Session ID:	771160300		Session ID:	771990200		Session ID:	774875821		Session ID:	778240327		Session ID:	778998620		Session ID:	779839471		Session ID:	781842082		Session ID:	786091066		Session ID:	787025148		Session ID:	794812542		Session ID:	816200189		Session ID:	829720705		Session ID:	831882777		Session ID:	835479236		Session ID:	839068429
Norm. diff. of pupil width (PW)	Repres. sim. (corr. of pop. vectors, PVs)		Norm. diff. of pupil width (PW)	Repres. sim. (corr. of pop. vectors, PVs)		Norm. diff. of pupil width (PW)	Repres. sim. (corr. of pop. vectors, PVs)		Norm. diff. of pupil width (PW)	Repres. sim. (corr. of pop. vectors, PVs)		Norm. diff. of pupil width (PW)	Repres. sim. (corr. of pop. vectors, PVs)		Norm. diff. of pupil width (PW)	Repres. sim. (corr. of pop. vectors, PVs)		Norm. diff. of pupil width (PW)	Repres. sim. (corr. of pop. vectors, PVs)		Norm. diff. of pupil width (PW)	Repres. sim. (corr. of pop. vectors, PVs)		Norm. diff. of pupil width (PW)	Repres. sim. (corr. of pop. vectors, PVs)		Norm. diff. of pupil width (PW)	Repres. sim. (corr. of pop. vectors, PVs)		Norm. diff. of pupil width (PW)	Repres. sim. (corr. of pop. vectors, PVs)		Norm. diff. of pupil width (PW)	Repres. sim. (corr. of pop. vectors, PVs)		Norm. diff. of pupil width (PW)	Repres. sim. (corr. of pop. vectors, PVs)		Norm. diff. of pupil width (PW)	Repres. sim. (corr. of pop. vectors, PVs)		Norm. diff. of pupil width (PW)	Repres. sim. (corr. of pop. vectors, PVs)		Norm. diff. of pupil width (PW)	Repres. sim. (corr. of pop. vectors, PVs)		Norm. diff. of pupil width (PW)	Repres. sim. (corr. of pop. vectors, PVs)
|PW_i - PW_j| / avg(PW)	CC(PV_i, PV_j)		|PW_i - PW_j| / avg(PW)	CC(PV_i, PV_j)		|PW_i - PW_j| / avg(PW)	CC(PV_i, PV_j)		|PW_i - PW_j| / avg(PW)	CC(PV_i, PV_j)		|PW_i - PW_j| / avg(PW)	CC(PV_i, PV_j)		|PW_i - PW_j| / avg(PW)	CC(PV_i, PV_j)		|PW_i - PW_j| / avg(PW)	CC(PV_i, PV_j)		|PW_i - PW_j| / avg(PW)	CC(PV_i, PV_j)		|PW_i - PW_j| / avg(PW)	CC(PV_i, PV_j)		|PW_i - PW_j| / avg(PW)	CC(PV_i, PV_j)		|PW_i - PW_j| / avg(PW)	CC(PV_i, PV_j)		|PW_i - PW_j| / avg(PW)	CC(PV_i, PV_j)		|PW_i - PW_j| / avg(PW)	CC(PV_i, PV_j)		|PW_i - PW_j| / avg(PW)	CC(PV_i, PV_j)		|PW_i - PW_j| / avg(PW)	CC(PV_i, PV_j)		|PW_i - PW_j| / avg(PW)	CC(PV_i, PV_j)		|PW_i - PW_j| / avg(PW)	CC(PV_i, PV_j)
0			0			0			0			0			0			0			0			0			0			0			0			0			0			0			0			0
0.11906	0.697111		0.00576096	0.860637		0.130711	0.876304		0.0569444	0.86374		0.212023	0.676557		0.0555486	0.858234		0.0480141	0.762017		0.109061	0.762039		0.0134267	0.773756		0.0459666	0.859375		0.045768	0.767252		0.476067	0.753117		0.000286706	0.816068		0.00250917	0.746511		0.0018324	0.879495		0.266939	0.844115		0.0740348	0.856882
0.223041	0.745804		0.100553	0.82966		0.34251	0.786095		0.0108296	0.863414		0.0113645	0.628718		0.0357909	0.842839		0.104146	0.65817		0.236911	0.693271		0.0531335	0.654514		0.0274285	0.839996		0.00827922	0.773511		0.0415771	0.779116		0.0442427	0.825882		0.117178	0.715314		0.00912579	0.866372		0.24614	0.851278		0.056954	0.808545
0.254332	0.757455		0.0983903	0.812624		0.169239	0.8754		0.00815464	0.868387		0.0204804	0.691631		0.0722063	0.772006		0.101834	0.648324		0.238551	0.733361		0.107618	0.630441		0.0578433	0.798636		0.0437457	0.773272		0.447401	0.747428		0.0200919	0.819917		0.0188643	0.693647		0.000434053	0.835954		0.169322	0.826599		0.0461592	0.729434
0.204868	0.727767		0.192164	0.801169		0.212529	0.820935		0.130817	0.811561		0.045798	0.653589		0.030566	0.850261		0.0731197	0.715001		0.265669	0.709075		0.139082	0.710149		0.0823044	0.847019		0.103254	0.753918		0.173647	0.75396		0.0375263	0.844028		0.0934327	0.692991		0.00782979	0.845456		0.188791	0.738343		0.202975	0.740696
0.218937	0.756229		0.161865	0.817447		0.146367	0.854876		0.35954	0.750565		0.156697	0.67907		0.0381987	0.786449		0.244703	0.551596		0.307712	0.729687		0.124488	0.644293		0.0748317	0.788975		0.0242411	0.803876		0.078371	0.759706		0.0971773	0.853301		0.0794334	0.756363		0.00991491	0.838079		0.399777	0.799872		0.0450559	0.829902
0.153817	0.750506		0.0164325	0.841323		0.321764	0.810533		0.439471	0.746544		0.0192453	0.727336		0.0317573	0.808334		0.0790247	0.625563		0.184107	0.708697		0.150446	0.580815		0.0570391	0.812098		0.163484	0.747713		0.0608812	0.738451		0.246884	0.818967		0.0444118	0.695573		0.0122146	0.838842		0.446636	0.797442		0.0369852	0.802676
0.229294	0.69711		0.000989091	0.856216		0.150275	0.860896		0.451991	0.746049		0.125472	0.69563		0.0178101	0.814687		0.141636	0.742371		0.247677	0.800723		0.162592	0.628465		0.0656267	0.764532		0.260646	0.681792		0.103352	0.767303		0.37092	0.795419		0.0376872	0.784218		0.0066595	0.83799		0.334648	0.797651		0.0433253	0.813279
0.283729	0.754088		0.133848	0.805357		0.421648	0.699719		0.463448	0.719351		0.123648	0.657967		0.022538	0.756538		0.101777	0.767158		0.202133	0.709621		0.220001	0.53875		0.0634927	0.779988		0.0319546	0.759319		0.173921	0.661611		0.328169	0.839397		0.000933782	0.755069		0.0204742	0.833562		0.399226	0.802506		0.0498724	0.788567
0.228515	0.747413		0.216105	0.818685		0.0479797	0.867058		0.47473	0.726368		0.274837	0.644883		0.002393	0.790841		0.0404924	0.676033		0.238414	0.716712		0.154415	0.570837		0.0538689	0.789398		0.0695066	0.774995		0.0231439	0.795483		0.00496897	0.787956		0.0187747	0.705932		0.0200164	0.843387		0.466468	0.811507		0.129246	0.736189
0.299909	0.704037		0.108185	0.828951		0.283505	0.786294		0.4004	0.747487		0.0113691	0.632175		0.0258489	0.776815		0.0031993	0.701289		0.263035	0.749048		0.17601	0.588988		0.0639747	0.809165		0.1984	0.677913		0.142981	0.695327		0.0080076	0.815071		0.128353	0.738007		0.008627	0.821692		0.413718	0.756452		0.240357	0.733489
0.297533	0.735466		0.0975728	0.875455		0.47053	0.669368		0.47069	0.723235		0.163469	0.720453		0.0469295	0.821131		0.13704	0.648375		0.326943	0.662327		0.217363	0.522169		0.0801559	0.77265		0.206978	0.615454		0.215536	0.722504		0.00477359	0.824537		0.0718942	0.762263		0.0266521	0.846462		0.475149	0.759977		0.265255	0.747834
0.186939	0.762586		0.0589655	0.857599		0.21872	0.787433		0.451958	0.730078		0.0828802	0.647117		0.00300325	0.78479		0.166612	0.578081		0.332064	0.744613		0.202659	0.522598		0.102341	0.798238		0.0726057	0.745523		0.141266	0.69696		0.069713	0.772034		0.0544085	0.736013		0.0129231	0.837346		0.454293	0.802636		0.181829	0.741172
0.253858	0.75907		0.0337491	0.824174		0.108847	0.872954		0.314957	0.780482		0.216556	0.703249		0.0203449	0.786008		0.0666353	0.707093		0.278494	0.741927		0.262567	0.494358		0.108761	0.782534		0.0546242	0.724809		0.405148	0.636414		0.0383461	0.82768		0.0755253	0.687835		0.00152611	0.839928		0.234302	0.836801		0.267274	0.740237
0.247045	0.730575		0.143743	0.851083		0.155155	0.872936		0.416459	0.776982		0.0152271	0.680688		0.0323237	0.779683		0.241869	0.481643		0.226379	0.776477		0.125806	0.594695		0.0855264	0.766441		0.111035	0.705277		0.149367	0.701164		0.0179681	0.856932		0.0585534	0.76697		0.00330003	0.83041		0.125295	0.851891		0.119462	0.763448
0.294285	0.693632		0.0743742	0.840083		0.215689	0.808252		0.425732	0.759884		0.126562	0.612232		0.0370444	0.78843		0.147735	0.560612		0.269828	0.761826		0.18831	0.50123		0.121852	0.853568		0.169139	0.745693		0.276633	0.634725		0.0702633	0.833906		0.100661	0.71418		0.00122258	0.824783		0.0764101	0.838601		0.147889	0.761189
0.211824	0.72034		0.288672	0.825846		0.360704	0.774428		0.452551	0.738414		0.0512535	0.590795		0.00318177	0.812955		0.159431	0.59838		0.250455	0.743353		0.1787	0.539303		0.11731	0.799387		0.00140722	0.73876		0.220174	0.622932		0.0751362	0.827172		0.0385209	0.714374		0.0129327	0.823883		0.321245	0.695556		0.1786	0.764508
0.233762	0.690484		0.18417	0.833702		0.531806	0.673868		0.445203	0.753455		0.0349995	0.679563		0.0110395	0.77124		0.0983007	0.725985		0.0167999	0.703887		0.174585	0.492836		0.098253	0.791572		0.0659679	0.761262		0.344041	0.748156		0.0957627	0.749494		0.0300573	0.722706		0.00289005	0.81638		0.298443	0.828848		0.0564179	0.814417
0.255924	0.690659		0.0321908	0.846776		0.355455	0.712671		0.159937	0.834294		0.043359	0.591507		0.0711518	0.720729		0.0143364	0.665253		0.214802	0.739739		0.203625	0.501071		0.0963642	0.771238		0.044225	0.707883		0.0607005	0.753989		0.396423	0.855414		0.0921673	0.71514		0.00951828	0.816025		0.389154	0.77921		0.0439072	0.806167
0.246829	0.708787		0.0961737	0.770521		0.0575012	0.862564		0.375207	0.76541		0.143632	0.643762		0.0546322	0.718423		0.146721	0.633654		0.151281	0.740905		0.200626	0.525644		0.0853616	0.796499		0.227395	0.622193		0.0710576	0.744056		0.0524445	0.814582		0.054916	0.7166		0.0282513	0.813429		0.147964	0.744393		0.0693069	0.812339
0.299835	0.675525		0.17097	0.744265		0.312482	0.730952		0.355604	0.782017		0.147239	0.623792		0.0489504	0.75138		0.0797594	0.636903		0.100049	0.714887		0.215643	0.468801		0.0440081	0.806642		0.0285388	0.73119		0.165648	0.649647		0.0385061	0.802859			0.723906		0.0111788	0.823524		0.468177	0.739972		0.0473246	0.765391
0.297031	0.689807		0.0145977	0.768765		0.308782	0.768727		0.444682	0.746429		0.0885689	0.647864		0.0953268	0.731686		0.186934	0.532051		0.0656838	0.738488		0.13894	0.533869		0.0682819	0.854853		0.0359743	0.713033		0.259309	0.643217		0.0569134	0.811527		0.129464	0.721442		9.50971e-05	0.805784		0.486538	0.7614		0.0319465	0.765103
0.368528	0.714054		0.11489	0.783786		0.184744	0.813836		0.424441	0.767487		0.145141	0.695309		0.00834353	0.775508		0.172023	0.530885		0.171657	0.738862		0.183478	0.493076		0.102784	0.824838		0.0135714	0.691335		0.452953	0.598292		0.0165324	0.838799		0.0527293	0.68723		0.0173414	0.820395		0.523652	0.768399		0.0281828	0.758855
0.358544	0.693046		0.117557	0.783335		0.277716	0.803262		0.378799	0.778387		0.0675304	0.679545		0.0339997	0.780651		0.00240219	0.664242		0.326803	0.674767		0.172368	0.583995		0.151086	0.771122		0.201654	0.648112		0.0264296	0.687802		0.234689	0.829018			0.714599		0.000476868	0.811344		0.186363	0.873622		0.0441882	0.77973
0.278118	0.662798		0.237598	0.794524		0.530887	0.626945		0.43899	0.742969		0.0531751	0.678517		0.0128207	0.760682		0.149504	0.583942		0.318063	0.713065		0.235518	0.49407		0.159898	0.776318		0.0193634	0.689543		0.441558	0.74994		0.124821	0.84309		0.0933106	0.685984		0.0144679	0.820918		0.313004	0.704368		0.0676844	0.7163
0.263911	0.706247		0.0609589	0.775649		0.544363	0.60611		0.475334	0.726693		0.0583453	0.644418		0.0338931	0.775671		0.347382	0.47199		0.225369	0.727717		0.239447	0.518855		0.140744	0.821048		0.108396	0.697857		0.0516195	0.736187		0.050655	0.788627		0.101009	0.63989		0.0311262	0.80749		0.521719	0.731629		0.0173125	0.770998
0.329829	0.667876		0.31455	0.80292		0.546639	0.637822		0.464056	0.753277		0.275204	0.703831		0.0397432	0.740315		0.0463401	0.617527		0.345104	0.664034		0.247651	0.491447		0.164733	0.812701		0.0863598	0.733002		0.0822428	0.695011		0.0447528	0.803467		0.255714	0.724338		0.00144908	0.819705		0.533468	0.804472		0.0647525	0.783308
0.699044	0.593033		0.783671	0.801009		0.527365	0.683938		0.432017	0.736801		0.0356736	0.59922		0.0133599	0.796663		0.112235	0.584767		0.161954	0.783297		0.191466	0.483279		0.126399	0.714337		0.0202369	0.741872		0.0824605	0.733329		0.00766347	0.805394		0.270664	0.680044		0.00320685	0.787303		0.215275	0.732762		0.0969629	0.75269
0.639726	0.66381		0.692491	0.791568		0.518162	0.665463		0.452575	0.715875		0.183452	0.681506		0.0404877	0.767592		0.240942	0.465437		0.240291	0.671067		0.191691	0.471042		0.101816	0.778565		0.257221	0.609176		0.151917	0.652955		0.08042	0.767557		0.0414451	0.691754		0.0171837	0.800827		0.495885	0.764189		0.121903	0.69131
0.32535	0.725724		0.478472	0.785099		0.530762	0.667778		0.317687	0.724148		0.0445724	0.619794		0.0145165	0.703786		0.141473	0.660982		0.216967	0.70206		0.225354	0.467438		0.0905232	0.781398		0.119346	0.645492		0.0996124	0.644189		0.0422617	0.818504		0.194931	0.709938		0.0218047	0.805735		0.475051	0.729394		0.0715638	0.76814
0.505492	0.695144		0.506807	0.715115		0.0637801	0.717448		0.128944	0.759167		0.0863385	0.607988		0.170195	0.746087		0.742048	0.549944		0.0435659	0.716522		0.0771189	0.695213		0.0174644	0.699271		0.782278	0.62009		0.0890337	0.766373		0.75745	0.740474		0.940482	0.58743		0.0850297	0.714591		0.209961	0.741661		0.0304625	0.791741
0.403662	0.711975		0.818663	0.7547		0.116332	0.769659		0.281202	0.778503		0.0655221	0.615136		0.15118	0.778532		0.655516	0.545075		0.521161	0.72491		0.236242	0.574916		0.0330651	0.754091		0.752865	0.615964		0.202367	0.683614		0.365376	0.799072		0.968034	0.605926		0.0859331	0.680303		0.212246	0.791183		0.0534116	0.761827
0.121109	0.691449		0.741733	0.740935		0.0177983	0.791846		0.179357	0.800716		0.184453	0.59752		0.102254	0.77933		0.568	0.540522		0.013086	0.724251		0.343439	0.55082		0.0403431	0.755435		0.728228	0.581924		0.322148	0.669775		0.29402	0.758941		0.885244	0.545291		0.106262	0.654057		0.124275	0.773973		0.0558766	0.78292
0.124314	0.746093		0.456966	0.760794		0.247281	0.732482		0.0273812	0.713512		0.0669711	0.563887		0.0885387	0.72907		0.506963	0.508891		0.106802	0.722095		0.268962	0.631758		0.0552619	0.797036		0.719453	0.606858		0.185355	0.676517		0.166475	0.761343		0.859318	0.521188		0.137216	0.666993		0.121462	0.770717		0.0527309	0.74157
0.234701	0.698476		0.106954	0.760477		0.373505	0.703212		0.0121861	0.66431		0.139989	0.590529		0.110822	0.749339		0.531177	0.519002		0.0691983	0.68107		0.0553651	0.683902		0.0649511	0.748819		0.729684	0.609727		0.264561	0.681667		0.185963	0.761952		0.590969	0.55843		0.128901	0.669017		0.0869055	0.788973		0.0612778	0.78414
0.13214	0.683124		0.0998119	0.780999		0.393431	0.672095		0.00815106	0.716498		0.136605	0.57774		0.0276215	0.681625		0.53396	0.504267		0.260473	0.73425		0.101427	0.635816		0.0391143	0.708842		0.552549	0.621611		0.3589	0.643706		0.113647	0.769146		1.00312	0.602786		0.0772689	0.717821		0.00755422	0.781973		0.0578176	0.739716
0.115071	0.701647		0.194166	0.753121		0.418538	0.633285		0.256529	0.768175		0.0406242	0.545929		0.120904	0.757228		0.513586	0.499063		0.235371	0.685936		0.0687734	0.577085		0.048801	0.735665		0.72222	0.604191		0.139016	0.682879		0.158181	0.744913		0.976762	0.611557		0.0469146	0.704144		0.026467	0.751123		0.0576152	0.760103
0.0930349	0.719618		0.111112	0.750602		0.389362	0.697657		0.188218	0.763183		0.0739745	0.602591		0.0506776	0.6795		0.52012	0.496067		0.406168	0.747294		0.0103686	0.527183		0.0670543	0.789983		0.433245	0.622493		0.256354	0.60905		0.322872	0.802216		0.553161	0.56137		0.0698462	0.70437		0.0194399	0.772502		0.0322616	0.720404
0.366478	0.645366		0.133064	0.749254		0.316053	0.655161		0.116964	0.768366		0.171922	0.592916		0.0177034	0.725202		0.518141	0.507164		0.0302437	0.720898		0.0452168	0.541652		0.0713624	0.760111		0.703851	0.565168		0.524764	0.548544		0.324224	0.796377		0.653396	0.569636		0.110101	0.710016		0.0796117	0.722739		0.014539	0.728907
0.330522	0.653076		0.0901147	0.739088		0.119023	0.808494		0.0991023	0.752724		0.0611347	0.577366		0.0716324	0.675537		0.529937	0.490872		0.0485693	0.739193		0.0947496	0.546826		0.0478168	0.71498		0.398285	0.605058		0.15795	0.602676		0.101554	0.72902		0.376551	0.539511		0.104457	0.672263		0.0314398	0.779146		0.0439462	0.682116
0.138369	0.666159		0.0931033	0.762927		0.0677973	0.774451		0.098235	0.751675		0.0146787	0.496808		0.106666	0.628224		0.5223	0.4877		0.153475	0.683676		0.123457	0.57323		0.0513083	0.728771		0.519065	0.612765		0.220754	0.640167		0.149482	0.795663		0.301924	0.589177		0.081129	0.667561		0.0596995	0.786727		0.0809067	0.689656
0.0781338	0.64795		0.376008	0.701239		0.399951	0.661538		0.0996548	0.734189		0.316842	0.576038		0.0142487	0.722647		0.441942	0.492241		0.330852	0.736227		0.0494728	0.54757		0.0326997	0.732013		0.532113	0.537127		0.254338	0.586398		0.0796014	0.752501		0.271872	0.607524		0.10221	0.711431		0.0844445	0.775719		0.171416	0.717449
0.132069	0.658968		0.54702	0.764238		0.320783	0.713502		0.0936527	0.763101		0.036642	0.608115		0.019027	0.711026		0.454996	0.464275		0.100117	0.720521		0.058617	0.568986		0.0361832	0.735827		0.480515	0.565381		0.481915	0.57802		0.158984	0.775149		0.560236	0.579414		0.124406	0.714125		0.0896492	0.760081		0.15941	0.706024
0.134487	0.650385		0.138466	0.748753		0.333154	0.678854		0.0728845	0.755001		0.0567222	0.602498		0.0616908	0.641188		0.459902	0.483808		0.134322	0.719827		0.0376547	0.588364		0.0101846	0.756124		0.456275	0.613532		0.461971	0.632055		0.131816	0.753671		0.749664	0.625277		0.117232	0.70476		0.0798417	0.779474		0.0979727	0.719278
0.165399	0.674304		0.0479827	0.742361		0.36489	0.664485		0.0786758	0.750334		0.156425	0.586423		0.00669794	0.699691		0.475876	0.442241		0.236766	0.751707		0.0221792	0.583543		0.0133512	0.786996		0.646449	0.523053		0.145891	0.611599		0.0496907	0.722521		0.531876	0.537541		0.122889	0.69126		0.128649	0.725452		0.0803208	0.694749
0.181605	0.666894		0.0657916	0.759655		0.374248	0.626115		0.0590008	0.740907		0.206895	0.644656		0.00541276	0.740576		0.471409	0.48104		0.331462	0.754324		0.0475455	0.615625		0.0172426	0.701456		0.614222	0.522832		0.188158	0.632989		0.209469	0.78208		0.617381	0.50729		0.128116	0.700992		0.133933	0.745665		0.00901918	0.676631
0.123867	0.642711		0.107482	0.764733		0.39435	0.638476		0.0836409	0.730321		0.0527479	0.580627		0.0346307	0.717361		0.503188	0.486889		0.134996	0.69455		0.0256345	0.595642		0.127792	0.704606		0.38109	0.591679		0.0818517	0.731625		0.162188	0.745603		0.72801	0.572515		0.0950079	0.678786		0.090604	0.761027		0.133265	0.687453
0.168935	0.691079		0.0916778	0.764524		0.170943	0.771243		0.0336439	0.724005		0.0324349	0.590117		0.046946	0.671013		0.448804	0.469829		0.0752129	0.698583		0.0628066	0.562805		0.143053	0.718159		0.269069	0.597123		0.0976979	0.724071		0.228479	0.753204		0.76789	0.52202		0.0356558	0.696182		0.0854778	0.749752		0.0336088	0.756575
0.293874	0.589615		0.084789	0.764484		0.13241	0.780635		0.0317878	0.739964		0.203643	0.593076		0.041024	0.715385		0.440904	0.466726		0.403312	0.655434		0.0483135	0.556206		0.110438	0.714446		0.380679	0.592979		0.220503	0.692002		0.433009	0.792732		0.773267	0.529383		0.0905272	0.708947		0.0385537	0.768843		0.0464891	0.701998
0.365671	0.577186		0.400937	0.709194		0.0591701	0.754938		0.0256624	0.703264		0.271096	0.60423		0.0460671	0.692384		0.423556	0.48542		0.240017	0.673909		0.0387444	0.543015		0.0542841	0.769417		0.338579	0.565377		0.101465	0.702457		0.132004	0.756663		0.379748	0.549066		0.10429	0.699935		0.0457381	0.767387		0.103674	0.698213
0.760441	0.511518		0.722214	0.737338		0.145851	0.774142		0.050584	0.71672		0.192259	0.582954		0.0941953	0.634718		0.388069	0.474395		0.115789	0.687505		0.00876752	0.578249		0.0114476	0.724368		0.273375	0.572364		0.169385	0.690065		0.0633588	0.754774		0.721241	0.563232		0.0811814	0.685089		0.0480541	0.771221		0.0855615	0.678742
0.661581	0.623822		0.624624	0.717933		0.20601	0.742691		0.0224011	0.72929		0.264499	0.574088		0.0774486	0.759264		0.419714	0.465302		0.130287	0.631032		0.0180838	0.572501		0.0159959	0.697601		0.220643	0.614648		0.291139	0.644317		0.0851906	0.737977		0.55566	0.539832		0.047659	0.687862		0.0571466	0.75911		0.0260554	0.742895
0.212767	0.683726		0.296956	0.7182		0.364714	0.694058		0.0449409	0.716688		0.0566996	0.540282		0.0701546	0.633944		0.575484	0.474384		0.00483758	0.709744		0.0427047	0.532023		0.0101606	0.70997		0.245347	0.578978		0.529292	0.590157		0.239626	0.751445		0.457204	0.488717		0.00180098	0.584677		0.0581473	0.740954		0.04617	0.713605
0.0683311	0.649403		0.115977	0.752642		0.309392	0.716393		0.00645892	0.714206		0.174508	0.588969		0.131346	0.610639		0.68112	0.498817		0.164024	0.697287		0.0047464	0.579921		0.00697818	0.66825		0.155192	0.621383		0.182612	0.6424		0.130736	0.720026		0.375783	0.514767		0.125795	0.603661		0.0383562	0.744924		0.088642	0.701422
0.0523118	0.670039		0.0757494	0.78411		0.104838	0.728813		0.00214222	0.728133		0.560394	0.620867		0.277738	0.59098		0.61787	0.475103		0.0755723	0.696412		0.00275106	0.546891		0.00320245	0.701361		0.214951	0.563513		0.315413	0.607823		0.0506543	0.747234		0.41465	0.564361		0.00265294	0.650528		0.0174583	0.733419		0.0318453	0.748761
0.0352977	0.685853		0.0918199	0.746923		0.16695	0.769935		0.000502763	0.702229		0.273649	0.367022		0.194364	0.644966		0.488576	0.496378		0.222617	0.682922		0.0422046	0.533207		0.0112192	0.696878		0.390061	0.566404		0.370487	0.580328		0.0370141	0.736541		0.322732	0.59019		0.0158454	0.682826		0.00810323	0.742394		0.0588328	0.711375
0.0713407	0.649414		0.203019	0.757979		0.127582	0.767325		0.00349588	0.736798		0.0365315	0.492899		0.0882884	0.76417		0.458197	0.494982		0.324721	0.720205		0.0171336	0.537152		0.00455456	0.67142		0.643871	0.522431		0.205643	0.610642		0.0461259	0.757917		0.224521	0.618027		0.0296526	0.705354		0.0175419	0.727392		0.0163396	0.709254
0.420714	0.63873		0.098217	0.753138		0.329214	0.715849		0.0121041	0.72344		0.0526097	0.550027		0.0240804	0.694491		0.497726	0.464016		0.0461577	0.674255		0.0146021	0.512335		0.0343327	0.675776		0.676787	0.550473		0.307051	0.611383		0.139034	0.7609		0.261385	0.592907		0.000644856	0.710822		0.0309301	0.740583		0.0213748	0.727499
0.248316	0.625281		0.333334	0.692924		0.395956	0.676835		0.0193895	0.709474		0.00754903	0.554761		0.0271911	0.671826		0.520582	0.456136		0.168857	0.714351		0.0192842	0.50767		0.0888173	0.734527		0.622859	0.53827		0.466104	0.596654		0.481592	0.743207		0.196732	0.630062		0.0104969	0.672099		0.078669	0.717571		0.0257366	0.719218
0.0771035	0.69674		0.301016	0.726569		0.338116	0.68672		0.0185102	0.721242		0.0188341	0.576673		0.0818017	0.670786		0.516027	0.435659		0.0268776	0.678074		0.000443696	0.5314		0.0795693	0.683859		0.629858	0.533686		0.144865	0.633928		0.422717	0.715627		0.203259	0.592495		0.00895876	0.651196		0.0706855	0.761321		0.035203	0.718971
0.11906	0.697111		0.00576096	0.860637		0.130711	0.876304		0.0569444	0.86374		0.212023	0.676557		0.0555486	0.858234		0.0480141	0.762017		0.109061	0.762039		0.0134267	0.773756		0.0459666	0.859375		0.045768	0.767252		0.476067	0.753117		0.000286706	0.816068		0.00250917	0.746511		0.0018324	0.879495		0.266939	0.844115		0.0740348	0.856882
0			0			0			0			0			0			0			0			0			0			0			0			0			0			0			0			0
0.103981	0.694081		0.106313	0.839501		0.211798	0.793022		0.067774	0.821715		0.200659	0.597919		0.0197577	0.859262		0.0561315	0.722304		0.12785	0.695542		0.0397068	0.8081		0.0185382	0.885674		0.0540472	0.772245		0.43449	0.801557		0.0445294	0.77323		0.119687	0.702179		0.0072934	0.920604		0.0207992	0.921222		0.0170808	0.878508
0.135272	0.740409		0.104151	0.855356		0.0385275	0.86612		0.0487897	0.853777		0.232504	0.643081		0.127755	0.757143		0.0538201	0.693426		0.12949	0.736712		0.0941917	0.775738		0.0118766	0.854849		0.00202225	0.764664		0.0286666	0.862998		0.0203786	0.832635		0.0213734	0.714338		0.00226645	0.903533		0.0976164	0.901361		0.120194	0.743284
0.0858084	0.686633		0.197925	0.80483		0.0818171	0.866856		0.187761	0.814482		0.257821	0.648666		0.0249826	0.823646		0.0251057	0.699086		0.156608	0.695495		0.125655	0.811213		0.0363377	0.846753		0.0574855	0.767268		0.30242	0.803422		0.037813	0.857712		0.0909236	0.772658		0.00966219	0.903501		0.45573	0.822189		0.27701	0.730902
0.0998773	0.641808		0.167626	0.851233		0.0156552	0.876512		0.416485	0.762192		0.0553265	0.772919		0.0937474	0.795546		0.196689	0.558327		0.198651	0.679512		0.111062	0.76735		0.0288651	0.831103		0.0215269	0.731726		0.554438	0.755705		0.097464	0.845275		0.0769243	0.725373		0.00808252	0.903194		0.666716	0.798396		0.0289788	0.871342
0.0347572	0.758723		0.0221934	0.815792		0.191052	0.822607		0.496415	0.772207		0.192778	0.68504		0.0237913	0.791865		0.0310106	0.621282		0.075046	0.672773		0.137019	0.694492		0.0110725	0.827396		0.117716	0.75858		0.536948	0.718229		0.247171	0.802227		0.0419027	0.692444		0.0103822	0.897154		0.713575	0.781128		0.0370495	0.8355
0.110234	0.718192		0.00477187	0.877885		0.0195639	0.873405		0.508935	0.759437		0.337495	0.627732		0.0377385	0.805974		0.18965	0.740845		0.356738	0.737159		0.149165	0.689255		0.01966	0.829842		0.214878	0.681966		0.579419	0.709736		0.371207	0.808362		0.0351781	0.738341		0.00482711	0.882097		0.601587	0.798849		0.0307095	0.895074
0.164669	0.690924		0.139609	0.797338		0.290936	0.686478		0.520393	0.72803		0.335672	0.614811		0.0780866	0.7702		0.149791	0.736256		0.0930722	0.729642		0.206574	0.666446		0.0175261	0.830541		0.0138134	0.750689		0.649988	0.629843		0.328456	0.825611		0.00157539	0.675303		0.0223066	0.875964		0.666165	0.793011		0.123907	0.823624
0.109455	0.716113		0.221866	0.813891		0.0827318	0.87454		0.531675	0.759993		0.0628131	0.868938		0.0579416	0.787604		0.00752166	0.707154		0.129353	0.695482		0.140988	0.687142		0.00790222	0.810879		0.0237386	0.714599		0.452923	0.753432		0.00468227	0.796745		0.0212839	0.696334		0.018184	0.890819		0.733407	0.788508		0.203281	0.747116
0.180849	0.729794		0.113946	0.822879		0.152793	0.823297		0.457345	0.773514		0.223393	0.639463		0.0813976	0.773662		0.0448148	0.710697		0.153974	0.704369		0.162583	0.716565		0.0180081	0.828963		0.152632	0.671545		0.619048	0.627161		0.0077209	0.846473		0.125844	0.710313		0.0067946	0.87509		0.680657	0.810695		0.314392	0.739274
0.178473	0.75601		0.0918118	0.813433		0.339818	0.680881		0.527635	0.728854		0.0485544	0.695543		0.102478	0.824216		0.0890263	0.640528		0.217882	0.631848		0.203937	0.679495		0.0341892	0.788037		0.16121	0.614599		0.691603	0.662819		0.00506029	0.885249		0.069385	0.707204		0.0248197	0.900914		0.742088	0.774313		0.33929	0.758448
0.0678789	0.769184		0.0647265	0.830775		0.0880085	0.812146		0.508903	0.751667		0.129143	0.563391		0.0525454	0.769844		0.118597	0.595289		0.223003	0.684869		0.189232	0.646585		0.056374	0.79874		0.118374	0.738251		0.617333	0.662836		0.0694263	0.742046		0.0518993	0.724564		0.0110907	0.896017		0.721232	0.784087		0.255864	0.760162
0.134798	0.692333		0.0279881	0.827473		0.0218648	0.90611		0.371902	0.802769		0.00453299	0.750915		0.0758936	0.772232		0.0186212	0.70661		0.169433	0.718453		0.24914	0.567405		0.0627942	0.791627		0.00885621	0.693614		0.881215	0.609049		0.0386328	0.821569		0.0730162	0.696435		0.00335851	0.890161		0.0326373	0.928546		0.341309	0.759395
0.127985	0.670488		0.149504	0.827959		0.0244431	0.890169		0.473403	0.759104		0.196796	0.651514		0.0878723	0.784668		0.193855	0.472355		0.117318	0.724867		0.11238	0.669483		0.0395597	0.817515		0.0652669	0.690272		0.625435	0.670467		0.0182548	0.823932		0.0560442	0.750827		0.00146763	0.896339		0.141644	0.921275		0.193497	0.758128
0.175225	0.711791		0.0801351	0.848364		0.0849772	0.851112		0.482676	0.760788		0.338585	0.605785		0.092593	0.782955		0.0997206	0.573857		0.160767	0.756451		0.174883	0.670561		0.0758855	0.876919		0.123371	0.759643		0.7527	0.605437		0.07055	0.835344		0.0981518	0.715032		0.000609813	0.884645		0.190529	0.916384		0.221924	0.770805
0.0927642	0.781199		0.294433	0.799634		0.229993	0.802804		0.509495	0.748717		0.263277	0.534988		0.0523669	0.822124		0.111417	0.615769		0.141395	0.752115		0.165273	0.656657		0.0713438	0.813547		0.0443608	0.720733		0.696241	0.629074		0.0754229	0.81582		0.0410301	0.707579		0.0147651	0.887992		0.588184	0.751979		0.252635	0.778125
0.114702	0.754106		0.178409	0.827014		0.401095	0.659341		0.502148	0.792007		0.247023	0.709405		0.0665881	0.761485		0.146315	0.666124		0.0922609	0.69853		0.161158	0.638283		0.0522863	0.838791		0.0201999	0.689763		0.132027	0.799253		0.0960494	0.791861		0.0275481	0.728661		0.00105765	0.874955		0.565382	0.768163		0.130453	0.805208
0.136864	0.678521		0.0379517	0.856926		0.224744	0.71493		0.216881	0.808337		0.255382	0.618263		0.1267	0.738488		0.0336777	0.705072		0.105742	0.685885		0.190198	0.659109		0.0503976	0.815974		0.00154297	0.669125		0.536768	0.728983		0.39671	0.803121		0.0896581	0.686623		0.0113507	0.874203		0.656093	0.822659		0.117942	0.821567
0.127769	0.727695		0.0904128	0.790125		0.0732102	0.881896		0.432151	0.765774		0.355655	0.625436		0.110181	0.723404		0.0987071	0.598039		0.0422204	0.719224		0.187199	0.669355		0.0393949	0.813527		0.181627	0.649423		0.547125	0.689116		0.0527312	0.812103		0.0574251	0.68083		0.0300837	0.873457		0.414903	0.805916		0.143342	0.837787
0.180775	0.584974		0.165209	0.74831		0.18177	0.752053		0.412549	0.743822		0.359262	0.590414		0.104499	0.757333		0.0317453	0.644491		0.00901169	0.707151		0.202217	0.650145		0.00195854	0.823923		0.0743068	0.72922		0.641715	0.651116		0.0382194	0.79611			0.693882		0.0130112	0.876033		0.735116	0.752086		0.121359	0.825227
0.177971	0.654603		0.00883671	0.735393		0.17807	0.774891		0.501626	0.781315		0.300592	0.595798		0.150875	0.752725		0.13892	0.534564		0.174745	0.678598		0.125513	0.611175		0.0223152	0.853206		0.00979366	0.718514		0.735376	0.595339		0.0566267	0.808691		0.126955	0.636661		0.0017373	0.877575		0.753477	0.780473		0.105981	0.8461
0.249468	0.685061		0.120651	0.781053		0.0540322	0.849133		0.481386	0.774124		0.357165	0.631975		0.0472051	0.766997		0.124009	0.507772		0.0625961	0.749425		0.170052	0.637076		0.0568178	0.753362		0.0593394	0.699939		0.92902	0.582333		0.0168191	0.865023		0.0552385	0.747954		0.0191738	0.879691		0.790591	0.791205		0.102218	0.837757
0.239484	0.674932		0.123318	0.7817		0.147005	0.82618		0.435744	0.798563		0.144493	0.682415		0.0215489	0.759261		0.0456119	0.706901		0.217742	0.635606		0.158941	0.627673		0.10512	0.75641		0.155886	0.645856		0.449638	0.658667		0.234975	0.82106			0.713307		0.00135553	0.880946		0.453301	0.813036		0.118223	0.859167
0.159058	0.681442		0.243359	0.77424		0.400175	0.643052		0.495935	0.755007		0.158848	0.692156		0.0683693	0.747926		0.10149	0.599803		0.209002	0.687248		0.222092	0.662895		0.113931	0.756981		0.0264046	0.692526		0.0345096	0.782798		0.125107	0.81378		0.0908015	0.711061		0.0163003	0.883095		0.579943	0.806361		0.141719	0.768499
0.144851	0.771895		0.0667199	0.831033		0.413651	0.640555		0.532279	0.749646		0.153678	0.699322		0.0894418	0.781397		0.299368	0.454838		0.116308	0.696521		0.22602	0.673581		0.0947775	0.790202		0.0626279	0.717623		0.527687	0.734293		0.0503683	0.80511		0.103518	0.683606		0.0329586	0.872169		0.788658	0.765534		0.0913472	0.824636
0.210769	0.663469		0.308789	0.832317		0.415927	0.628061		0.521001	0.77997		0.063181	0.791939		0.0952919	0.741476		0.0943542	0.633018		0.236044	0.620959		0.234224	0.622832		0.118766	0.787225		0.0405918	0.694636		0.55831	0.689915		0.0444661	0.811261		0.253205	0.662558		0.00328147	0.880221		0.800406	0.785712		0.138787	0.851718
0.818104	0.566661		0.77791	0.788442		0.396653	0.641581		0.488962	0.762673		0.247697	0.555871		0.0689086	0.771941		0.0642214	0.62258		0.271015	0.696959		0.17804	0.609543		0.0804321	0.726395		0.0255311	0.698123		0.558528	0.667055		0.00737676	0.783936		0.273173	0.683818		0.00503924	0.855852		0.482214	0.801742		0.170998	0.816365
0.758786	0.580718		0.68673	0.79824		0.38745	0.641633		0.50952	0.734705		0.0285715	0.729827		0.0150609	0.775523		0.192928	0.465436		0.131231	0.650162		0.178265	0.645146		0.0558496	0.787291		0.211453	0.632747		0.627984	0.610272		0.0801333	0.74924		0.0439542	0.71567		0.0190161	0.861362		0.762824	0.738654		0.195938	0.747351
0.44441	0.675513		0.472711	0.778342		0.400051	0.660368		0.374632	0.774592		0.256596	0.6734		0.0700651	0.744755		0.189487	0.593031		0.107906	0.655035		0.211928	0.644154		0.0445566	0.808829		0.165114	0.645563		0.575679	0.604868		0.0425484	0.806322		0.19744	0.728401		0.0236371	0.860217		0.74199	0.722995		0.145599	0.835987
0.624552	0.629556		0.501046	0.727589		0.194492	0.682957		0.0719992	0.760207		0.298362	0.608078		0.114646	0.726823		0.790063	0.502275		0.0654949	0.711392		0.0636922	0.612261		0.063431	0.700037		0.828046	0.559519		0.565101	0.707111		0.757737	0.688694		0.942991	0.602962		0.0868621	0.748117		0.4769	0.677122		0.0435722	0.770984
0.522722	0.639841		0.812902	0.738702		0.247043	0.752999		0.224258	0.786438		0.277546	0.50352		0.0956312	0.748543		0.70353	0.513261		0.630222	0.699769		0.222815	0.59588		0.0790317	0.779983		0.798633	0.580428		0.678434	0.62479		0.365663	0.791744		0.970543	0.616096		0.0877655	0.739173		0.0546925	0.802375		0.0206231	0.820971
0.240169	0.660583		0.735972	0.742665		0.112913	0.788157		0.122413	0.797273		0.0275701	0.631253		0.0467058	0.770795		0.616015	0.492217		0.0959748	0.765739		0.330012	0.550274		0.0863097	0.810749		0.773996	0.549001		0.798215	0.593128		0.294307	0.746257		0.887753	0.583475		0.108095	0.717971		0.142664	0.783724		0.0181581	0.835279
0.243374	0.664722		0.451205	0.751515		0.116569	0.750052		0.0843255	0.729234		0.145052	0.526303		0.03299	0.72107		0.554978	0.458711		0.0022587	0.717302		0.255536	0.584747		0.101229	0.795129		0.765221	0.558078		0.661422	0.646644		0.166761	0.770609		0.861827	0.575844		0.139048	0.716053		0.145477	0.789323		0.0213038	0.812935
0.353761	0.668172		0.101193	0.769152		0.242794	0.681881		0.0447582	0.711489		0.0720345	0.606209		0.0552734	0.730407		0.579191	0.476728		0.178259	0.683761		0.0419384	0.622784		0.110918	0.784485		0.775452	0.586575		0.740628	0.634204		0.186249	0.758518		0.593478	0.596774		0.130733	0.706599		0.180033	0.809817		0.0127569	0.836796
0.2512	0.704889		0.094051	0.783667		0.262719	0.629295		0.0487933	0.730003		0.348629	0.518311		0.0279271	0.720403		0.581974	0.469192		0.369534	0.705892		0.114854	0.618416		0.0850809	0.751001		0.598317	0.56864		0.834967	0.561473		0.113934	0.715541		1.00563	0.60215		0.0791013	0.755789		0.259385	0.793374		0.0162172	0.796372
0.234131	0.675516		0.188405	0.753051		0.287827	0.575909		0.199584	0.779178		0.252648	0.478999		0.0653554	0.758128		0.561601	0.471823		0.344432	0.703565		0.0822001	0.644076		0.0947677	0.779882		0.767988	0.572385		0.615083	0.638442		0.158468	0.758364		0.979271	0.600614		0.048747	0.759812		0.240472	0.783879		0.0164196	0.82693
0.212095	0.661232		0.105351	0.756557		0.258651	0.655462		0.131273	0.765992		0.138049	0.682695		0.00487104	0.685888		0.568134	0.460594		0.515229	0.706092		0.00305813	0.656315		0.113021	0.804987		0.479013	0.569664		0.732421	0.559454		0.323159	0.745966		0.555671	0.57036		0.0716786	0.756371		0.247499	0.828164		0.106296	0.769219
0.485538	0.675588		0.127303	0.736382		0.185341	0.610225		0.0600195	0.796218		0.040101	0.645171		0.0378453	0.727105		0.566155	0.465724		0.0788171	0.685693		0.0317901	0.617083		0.117329	0.790494		0.749619	0.52699		1.00083	0.522936		0.324511	0.767659		0.655905	0.530919		0.111934	0.758849		0.346551	0.763714		0.0885738	0.750427
0.449582	0.626503		0.0843538	0.744725		0.249734	0.787326		0.0421579	0.775372		0.273158	0.547113		0.127181	0.678338		0.577951	0.460209		0.0604915	0.724414		0.0813229	0.637699		0.0937834	0.778843		0.444053	0.554119		0.634017	0.553734		0.101841	0.762808		0.37906	0.587344		0.10629	0.735262		0.235499	0.819754		0.0300885	0.741712
0.257429	0.617492		0.0873423	0.780782		0.0629142	0.779424		0.0412906	0.780734		0.226702	0.442884		0.162215	0.635786		0.570314	0.473429		0.262536	0.703172		0.11003	0.63561		0.0972749	0.786242		0.564833	0.567318		0.696821	0.56684		0.149768	0.75332		0.304433	0.626136		0.0829614	0.697702		0.207239	0.809665		0.00687197	0.736857
0.197194	0.677305		0.370247	0.728687		0.269239	0.680306		0.0427104	0.746174		0.104819	0.701104		0.0412999	0.728356		0.489956	0.477437		0.439913	0.707603		0.0360461	0.672476		0.0786663	0.766378		0.577881	0.498275		0.730405	0.559956		0.0798881	0.74857		0.274381	0.632701		0.104043	0.764077		0.182494	0.797195		0.0973808	0.76015
0.251129	0.673785		0.541259	0.732731		0.190071	0.652715		0.0367083	0.754234		0.248665	0.558401		0.0365217	0.718974		0.50301	0.457384		0.00894393	0.71172		0.0451903	0.662368		0.0821499	0.777665		0.526283	0.541797		0.957982	0.5477		0.159271	0.76851		0.562745	0.619712		0.126238	0.765145		0.17729	0.800855		0.0853753	0.780504
0.253547	0.617804		0.132705	0.753534		0.202443	0.665369		0.0159401	0.784679		0.268746	0.552556		0.117239	0.660248		0.507916	0.452805		0.0252616	0.714038		0.024228	0.619447		0.0561513	0.813063		0.502043	0.553922		0.938038	0.577574		0.132103	0.761863		0.752173	0.563516		0.119064	0.772596		0.187097	0.817058		0.0239379	0.774499
0.284459	0.593891		0.0422217	0.758037		0.234178	0.661395		0.0217314	0.768671		0.0555985	0.538828		0.0488507	0.713501		0.52389	0.440063		0.345827	0.698437		0.00875249	0.645835		0.0593178	0.804242		0.692216	0.515875		0.621958	0.574065		0.0499774	0.727565		0.534385	0.559739		0.124721	0.754999		0.13829	0.798187		0.00628602	0.74427
0.300665	0.639206		0.0600307	0.750446		0.243536	0.592854		0.00205639	0.727966		0.00512862	0.672488		0.0501359	0.756567		0.519424	0.470726		0.440523	0.718292		0.0341188	0.608688		0.0632092	0.783199		0.65999	0.502105		0.287909	0.609539		0.209755	0.783831		0.61989	0.545095		0.129949	0.77285		0.133006	0.810704		0.0650156	0.718518
0.242927	0.605185		0.101721	0.766059		0.263639	0.621361		0.0266966	0.732089		0.264771	0.541311		0.0209179	0.73167		0.551203	0.483041		0.025935	0.681916		0.0122078	0.595602		0.173759	0.739495		0.426858	0.540221		0.394215	0.691238		0.162475	0.739018		0.730519	0.623804		0.0968403	0.731143		0.176335	0.818484		0.2073	0.702685
0.287995	0.637597		0.0859168	0.740108		0.301654	0.782575		0.0233004	0.740994		0.244458	0.618319		0.102495	0.685594		0.496818	0.457248		0.184274	0.69851		0.0493799	0.61822		0.18902	0.785648		0.314837	0.528429		0.573765	0.649377		0.228766	0.742		0.7704	0.567713		0.0374882	0.757031		0.181461	0.819463		0.107644	0.765385
0.412934	0.578723		0.079028	0.765136		0.263121	0.776798		0.0251566	0.752625		0.0083806	0.48132		0.0145246	0.732425		0.488919	0.463333		0.512373	0.628605		0.0348868	0.62424		0.156404	0.751754		0.426447	0.546087		0.69657	0.623194		0.433296	0.77182		0.775776	0.547933		0.0923596	0.775306		0.228385	0.830876		0.120524	0.730133
0.484731	0.555586		0.395176	0.740495		0.0715414	0.737855		0.031282	0.733119		0.0590727	0.653818		0.00948157	0.692105		0.47157	0.457536		0.349078	0.661255		0.0253177	0.595186		0.100251	0.795903		0.384347	0.538917		0.577532	0.638861		0.13229	0.797844		0.382257	0.555654		0.106122	0.771638		0.221201	0.82883		0.177709	0.688238
0.879501	0.467518		0.716453	0.745069		0.0151395	0.780373		0.00636036	0.729963		0.0197647	0.575554		0.149744	0.665145		0.436083	0.458092		0.006728	0.671321		0.00465921	0.598264		0.0574142	0.762623		0.319143	0.535701		0.645452	0.621964		0.0636455	0.787816		0.72375	0.564829		0.0830138	0.735223		0.218885	0.816602		0.159596	0.736895
0.780641	0.54196		0.618863	0.727297		0.075299	0.73737		0.0345433	0.744293		0.0524759	0.539743		0.0218999	0.718927		0.467728	0.452053		0.0212257	0.63832		0.00465703	0.58884		0.0299708	0.740741		0.266411	0.570466		0.767206	0.58954		0.0854773	0.717321		0.55817	0.549765		0.0494914	0.749745		0.209792	0.823306		0.10009	0.745388
0.331827	0.64064		0.291195	0.718779		0.234002	0.692419		0.0120035	0.746754		0.155324	0.551228		0.125703	0.652511		0.623498	0.468335		0.104223	0.673958		0.029278	0.625351		0.035806	0.714263		0.291115	0.511626		1.00536	0.547602		0.239913	0.78422		0.459714	0.553724		0.00363338	0.632985		0.208792	0.802699		0.120205	0.725819
0.187391	0.666181		0.110216	0.763595		0.178681	0.714329		0.0504854	0.750189		0.037515	0.464481		0.186894	0.629636		0.729134	0.484856		0.273085	0.691588		0.00868033	0.609196		0.0389885	0.733128		0.20096	0.593662		0.658679	0.606977		0.131023	0.709988		0.378292	0.546542		0.123962	0.62115		0.228583	0.817521		0.162677	0.721024
0.171372	0.683439		0.0699884	0.781598		0.235549	0.735557		0.0548021	0.73422		0.34837	0.659747		0.333287	0.607882		0.665884	0.476436		0.0334885	0.678815		0.0106757	0.633945		0.0491691	0.743911		0.260719	0.538444		0.79148	0.549042		0.0509411	0.748184		0.417159	0.562885		0.00448534	0.671525		0.249481	0.809833		0.10588	0.784944
0.154358	0.676861		0.086059	0.760057		0.297661	0.771256		0.0564416	0.725794		0.0616259	0.485122		0.249913	0.643366		0.53659	0.476959		0.331678	0.685742		0.0287779	0.641094		0.0571859	0.748422		0.435829	0.522134		0.846554	0.576752		0.0373008	0.774567		0.325241	0.610986		0.0176778	0.750695		0.258836	0.812056		0.132868	0.732995
0.190401	0.642245		0.197258	0.742369		0.00312901	0.772132		0.0604403	0.758294		0.248555	0.436897		0.0327398	0.74275		0.506211	0.481454		0.433782	0.709772		0.00370686	0.613739		0.0505212	0.733916		0.689639	0.511587		0.68171	0.538391		0.0464126	0.733381		0.22703	0.613229		0.031485	0.749052		0.249397	0.800922		0.0576951	0.737785
0.539774	0.626437		0.0924561	0.756465		0.198503	0.717765		0.0448403	0.75758		0.264633	0.532686		0.0314682	0.719536		0.54574	0.457072		0.0629031	0.646973		0.00117536	0.611154		0.0802993	0.710566		0.722555	0.495241		0.783118	0.553624		0.139321	0.775872		0.263894	0.609213		0.00247725	0.774085		0.236009	0.810039		0.0954096	0.78423
0.367376	0.624065		0.327573	0.714399		0.265244	0.642965		0.0375549	0.749175		0.204474	0.578803		0.0827398	0.687782		0.568596	0.44612		0.0597966	0.683972		0.00585744	0.604412		0.0428507	0.722003		0.668626	0.529016		0.942171	0.585219		0.481879	0.719508		0.199241	0.609572		0.0123293	0.729243		0.18827	0.787749		0.0997714	0.760389
0.196164	0.622697		0.295255	0.713449		0.207404	0.666291		0.0754546	0.737145		0.230858	0.532331		0.13735	0.664153		0.564041	0.430154		0.0821833	0.680439		0.0138704	0.601665		0.0336026	0.672733		0.675626	0.522692		0.620932	0.602978		0.423004	0.711056		0.205768	0.627061		0.00712636	0.722977		0.196253	0.776946		0.109238	0.748444
0.223041	0.745804		0.100553	0.82966		0.34251	0.786095		0.0108296	0.863414		0.0113645	0.628718		0.0357909	0.842839		0.104146	0.65817		0.236911	0.693271		0.0531335	0.654514		0.0274285	0.839996		0.00827922	0.773511		0.0415771	0.779116		0.0442427	0.825882		0.117178	0.715314		0.00912579	0.866372		0.24614	0.851278		0.056954	0.808545
0.103981	0.694081		0.106313	0.839501		0.211798	0.793022		0.067774	0.821715		0.200659	0.597919		0.0197577	0.859262		0.0561315	0.722304		0.12785	0.695542		0.0397068	0.8081		0.0185382	0.885674		0.0540472	0.772245		0.43449	0.801557		0.0445294	0.77323		0.119687	0.702179		0.0072934	0.920604		0.0207992	0.921222		0.0170808	0.878508
0			0			0			0			0			0			0			0			0			0			0			0			0			0			0			0			0
0.0312909	0.757858		0.00216222	0.878292		0.173271	0.807584		0.0189843	0.841182		0.0318449	0.701641		0.107997	0.751649		0.00231132	0.672406		0.00163998	0.730037		0.0544849	0.773034		0.0304148	0.846252		0.052025	0.799903		0.405823	0.810421		0.0241508	0.800902		0.0983134	0.742982		0.00955985	0.910262		0.0768173	0.900138		0.103113	0.740944
0.0181723	0.774686		0.0916113	0.842961		0.129981	0.755015		0.119987	0.774468		0.0571625	0.71533		0.00522489	0.857414		0.0310258	0.689368		0.0287582	0.673732		0.0859481	0.773676		0.0548759	0.875832		0.111533	0.782401		0.13207	0.856382		0.00671635	0.820144		0.21061	0.665058		0.0169556	0.906146		0.434931	0.83827		0.259929	0.704738
0.00410348	0.780885		0.0613126	0.81296		0.196143	0.787114		0.348711	0.699972		0.145332	0.681962		0.0739897	0.805507		0.140557	0.642304		0.0708014	0.723713		0.0713547	0.757926		0.0474033	0.860835		0.0325203	0.816394		0.119948	0.791705		0.0529346	0.830478		0.196611	0.693596		0.000789121	0.896337		0.645917	0.827147		0.0118981	0.829559
0.0692236	0.745486		0.0841201	0.805514		0.0207459	0.836527		0.428641	0.689233		0.00788078	0.681169		0.00403362	0.837296		0.0251208	0.670332		0.052804	0.695579		0.0973123	0.647715		0.0296107	0.868678		0.171763	0.73142		0.102458	0.759933		0.202642	0.74489		0.161589	0.688733		0.00308877	0.900619		0.692776	0.795571		0.0199687	0.827181
0.00625295	0.747081		0.101542	0.875476		0.192234	0.77485		0.441161	0.67186		0.136837	0.726455		0.0179808	0.865705		0.245781	0.661503		0.484588	0.696981		0.109458	0.6404		0.0381982	0.833361		0.268925	0.709578		0.144929	0.723789		0.326677	0.757853		0.154865	0.707806		0.00246629	0.894207		0.580788	0.823651		0.0136287	0.873784
0.0606879	0.764457		0.0332953	0.826798		0.0791381	0.736211		0.452619	0.670948		0.135013	0.757265		0.0583289	0.72939		0.205923	0.661313		0.0347778	0.708373		0.166867	0.662621		0.0360642	0.852921		0.0402338	0.799912		0.215498	0.586798		0.283927	0.766068		0.118111	0.750168		0.0296	0.885432		0.645366	0.81029		0.106826	0.802953
0.00547439	0.79991		0.115552	0.848389		0.29453	0.800292		0.463901	0.667658		0.263472	0.607171		0.0381839	0.792556		0.0636531	0.695114		0.00150304	0.685342		0.101281	0.703486		0.0264404	0.840553		0.0777858	0.726265		0.0184332	0.765085		0.0492116	0.758468		0.098403	0.71207		0.0108906	0.894331		0.712608	0.779363		0.1862	0.738419
0.0768683	0.770816		0.00763212	0.801264		0.0590051	0.810239		0.389571	0.72129		0.0227337	0.720486		0.0616399	0.807787		0.100946	0.628615		0.0261243	0.728184		0.122876	0.723358		0.0365462	0.864679		0.206679	0.649653		0.184558	0.649772		0.0522503	0.769498		0.245531	0.674026		0.000498794	0.882658		0.659858	0.808641		0.297311	0.73898
0.0744921	0.767488		0.198125	0.77546		0.12802	0.687915		0.459861	0.681475		0.152104	0.619358		0.0827204	0.832423		0.0328948	0.631808		0.0900316	0.679707		0.16423	0.685229		0.0527274	0.801181		0.215257	0.636983		0.257113	0.697491		0.0394691	0.791984		0.189072	0.672772		0.0175263	0.904276		0.721289	0.781768		0.322209	0.740904
0.0361019	0.783227		0.041587	0.812539		0.12379	0.715805		0.441129	0.659755		0.0715157	0.786039		0.0327877	0.790028		0.062466	0.644226		0.0951534	0.716721		0.149525	0.640144		0.0749122	0.842719		0.0643265	0.810859		0.182843	0.640952		0.113956	0.787345		0.171586	0.693443		0.00379734	0.896604		0.700432	0.798359		0.238783	0.748851
0.0308173	0.811143		0.134302	0.774762		0.233663	0.789881		0.304128	0.756699		0.205192	0.60642		0.0561358	0.78651		0.0375103	0.656231		0.0415828	0.694201		0.209433	0.623149		0.0813324	0.835174		0.0629034	0.707579		0.446725	0.597249		0.00589661	0.782528		0.192703	0.65222		0.0106519	0.887614		0.0118381	0.907147		0.324228	0.733683
0.024004	0.808418		0.0431901	0.897127		0.187355	0.811802		0.405629	0.726817		0.0038626	0.666006		0.0681146	0.817065		0.137724	0.579443		0.0105323	0.717551		0.0726729	0.698823		0.0580979	0.844304		0.119314	0.735128		0.190945	0.653549		0.0262746	0.796778		0.175731	0.719388		0.00582577	0.899445		0.120845	0.926214		0.176416	0.759115
0.0712446	0.749075		0.0261784	0.887599		0.126821	0.795974		0.414902	0.714101		0.137926	0.725158		0.0728353	0.775961		0.0435892	0.642194		0.0329168	0.716638		0.135176	0.738117		0.0944237	0.884174		0.177419	0.733455		0.31821	0.573611		0.0260207	0.790686		0.217839	0.681549		0.00790321	0.894515		0.16973	0.921088		0.204843	0.751864
0.0112165	0.72582		0.18812	0.833452		0.0181946	0.752659		0.441721	0.692309		0.062618	0.720365		0.0326092	0.820401		0.0552857	0.635268		0.0135445	0.70843		0.125566	0.71105		0.089882	0.868775		0.00968644	0.807812		0.261751	0.576897		0.0308935	0.853763		0.0786567	0.75295		0.0220585	0.883692		0.567385	0.77493		0.235554	0.781243
0.0107215	0.72186		0.284722	0.803889		0.189296	0.702353		0.434374	0.707255		0.046364	0.690691		0.0468304	0.760028		0.202446	0.605352		0.220111	0.661944		0.121451	0.702715		0.0708245	0.844091		0.0742471	0.725948		0.302463	0.777339		0.05152	0.79819		0.147235	0.687156		0.00623574	0.884757		0.544583	0.791017		0.113372	0.780318
0.032883	0.828462		0.0683618	0.83099		0.0129453	0.657111		0.149107	0.851194		0.0547236	0.616348		0.106943	0.701021		0.0898092	0.654804		0.0221085	0.672671		0.150492	0.725375		0.0689358	0.817512		0.0525042	0.693318		0.102278	0.733453		0.352181	0.790827		0.209345	0.666247		0.0186441	0.880407		0.635294	0.82331		0.100861	0.804034
0.0237879	0.778118		0.196726	0.742498		0.285008	0.7844		0.364377	0.747769		0.154996	0.714558		0.0904232	0.726089		0.0425757	0.638017		0.0856296	0.691873		0.147493	0.705647		0.0579331	0.835466		0.235675	0.633326		0.112635	0.739187		0.00820181	0.780713		0.0622617	0.680554		0.0373771	0.870271		0.394104	0.796485		0.126261	0.821773
0.0767947	0.737929		0.271523	0.713101		0.0300278	0.787033		0.344775	0.748094		0.158603	0.709431		0.0847413	0.760024		0.0243861	0.64881		0.136862	0.641312		0.16251	0.686609		0.0165796	0.844478		0.0202595	0.73839		0.207225	0.62728		0.0827488	0.770831			0.63906		0.0203046	0.872539		0.714317	0.771211		0.104279	0.825134
0.0739898	0.748308		0.11515	0.691954		0.0337279	0.747353		0.433852	0.683598		0.0999334	0.68152		0.131118	0.752645		0.0827886	0.587734		0.302595	0.623735		0.0858061	0.654269		0.0408534	0.8598		0.0442536	0.747813		0.300886	0.573442		0.101156	0.800227		0.246641	0.721714		0.0090307	0.8776		0.732678	0.7957		0.0889004	0.836671
0.145487	0.799529		0.0143372	0.787339		0.157766	0.763495		0.413612	0.708993		0.156506	0.723509		0.0274474	0.776905		0.0678776	0.548326		0.0652539	0.673508		0.130345	0.662432		0.0753559	0.756627		0.00529214	0.756773		0.49453	0.555328		0.0277103	0.806574		0.0644483	0.642461		0.0264672	0.884584		0.769792	0.797615		0.0851367	0.815764
0.135503	0.745664		0.0170047	0.862029		0.0647937	0.773463		0.36797	0.727075		0.0561659	0.662196		0.00179119	0.800853		0.101743	0.603705		0.0898922	0.721429		0.119234	0.645182		0.123658	0.764134		0.209933	0.636265		0.0151475	0.658673		0.190446	0.802655			0.675913		0.00864893	0.87657		0.432502	0.822009		0.101142	0.827643
0.0550773	0.736105		0.137045	0.823078		0.188377	0.625411		0.428161	0.68313		0.0418106	0.698201		0.0486116	0.782138		0.0453581	0.563055		0.0811522	0.698218		0.182385	0.707322		0.13247	0.793507		0.0276426	0.704075		0.39998	0.794449		0.0805779	0.810283		0.210488	0.68693		0.0235937	0.868989		0.559144	0.808425		0.124638	0.759425
0.0408699	0.731167		0.0395936	0.797568		0.201853	0.600301		0.464505	0.643423		0.0469807	0.670561		0.0696841	0.771187		0.243237	0.586656		0.0115422	0.692402		0.186313	0.694155		0.113316	0.811532		0.116675	0.705639		0.0931966	0.783887		0.0948977	0.831685		0.016169	0.699371		0.040252	0.876551		0.767858	0.762305		0.0742664	0.828429
0.106788	0.753546		0.415103	0.76673		0.204129	0.567108		0.453227	0.699384		0.26384	0.606694		0.0755342	0.723476		0.150486	0.551632		0.108194	0.66058		0.194517	0.691887		0.137305	0.802456		0.094639	0.700457		0.12382	0.683842		0.0889954	0.780292		0.372892	0.646308		0.0105749	0.879913		0.779607	0.793322		0.121707	0.83355
0.922085	0.54694		0.884224	0.742653		0.184855	0.667324		0.421188	0.695445		0.0470382	0.749176		0.0491509	0.764186		0.00808993	0.625231		0.398865	0.654311		0.138333	0.693457		0.0989703	0.750891		0.0285161	0.703301		0.124038	0.722381		0.0519061	0.80001		0.153486	0.696929		0.0123326	0.852194		0.461415	0.807012		0.153917	0.828867
0.862767	0.586458		0.793044	0.757565		0.175652	0.633376		0.441746	0.65447		0.172087	0.663104		0.00469681	0.793145		0.136797	0.603617		0.00338061	0.731607		0.138558	0.721952		0.0743878	0.78588		0.265501	0.618512		0.193494	0.617332		0.124663	0.788343		0.0757326	0.690526		0.0263095	0.873681		0.742025	0.765036		0.178857	0.767536
0.54839	0.695138		0.579024	0.742179		0.188252	0.612697		0.306858	0.641585		0.0559369	0.647496		0.0503074	0.738598		0.245619	0.554535		0.0199438	0.642912		0.172221	0.721824		0.0630948	0.806579		0.111066	0.679422		0.141189	0.601255		0.00198096	0.794003		0.0777534	0.635934		0.0309305	0.864278		0.721191	0.735915		0.128518	0.844448
0.728533	0.673393		0.60736	0.684363		0.40629	0.592908		0.139773	0.739841		0.0977031	0.641159		0.134404	0.742393		0.846194	0.539317		0.193345	0.7061		0.0239854	0.526597		0.0448928	0.719207		0.773999	0.62527		0.130611	0.704267		0.713207	0.665351		0.823304	0.608852		0.0941555	0.767162		0.456101	0.692		0.0264914	0.731668
0.626703	0.669801		0.919216	0.710732		0.458841	0.663551		0.292032	0.752424		0.0768866	0.64156		0.115389	0.770259		0.759662	0.543515		0.758072	0.644321		0.183109	0.56938		0.0604936	0.774548		0.744585	0.62282		0.243944	0.658606		0.321133	0.744967		0.850856	0.634468		0.0950589	0.74552		0.0338933	0.786921		0.00354233	0.787234
0.34415	0.703289		0.842285	0.688825		0.324711	0.713031		0.190187	0.771753		0.173089	0.513854		0.0664635	0.767159		0.672146	0.537616		0.223825	0.683691		0.290306	0.530412		0.0677715	0.805544		0.719949	0.603717		0.363725	0.586359		0.249777	0.684041		0.768067	0.617833		0.115388	0.732306		0.121865	0.773926		0.00107736	0.791408
0.347355	0.759081		0.557518	0.699936		0.0952291	0.707031		0.0165515	0.689175		0.0556065	0.702703		0.0527477	0.727244		0.611109	0.501984		0.130109	0.73129		0.215829	0.543854		0.0826903	0.805601		0.711174	0.625668		0.226932	0.625224		0.122232	0.722577		0.74214	0.595983		0.146341	0.727634		0.124678	0.773389		0.00422302	0.796522
0.457742	0.685915		0.207507	0.738129		0.0309954	0.637608		0.0230158	0.609233		0.128624	0.557342		0.0750311	0.737863		0.635322	0.525014		0.306109	0.668857		0.00223164	0.562561		0.0923796	0.783443		0.721404	0.625752		0.306138	0.624356		0.14172	0.762185		0.473791	0.6127		0.138027	0.717366		0.159234	0.80286		0.00432388	0.820084
0.355181	0.700839		0.200364	0.73002		0.050921	0.589111		0.0189807	0.678691		0.14797	0.71589		0.00816937	0.705312		0.638106	0.50514		0.497384	0.644676		0.154561	0.606632		0.0665427	0.764676		0.54427	0.593365		0.400477	0.558581		0.0694045	0.657633		0.885939	0.637042		0.0863947	0.769183		0.238586	0.78023		0.000863597	0.78827
0.338112	0.742802		0.294719	0.714724		0.0760283	0.592743		0.267358	0.769084		0.0519888	0.663073		0.0851131	0.769205		0.617732	0.499251		0.472282	0.637569		0.121907	0.636875		0.0762295	0.781576		0.71394	0.610629		0.180593	0.622078		0.113939	0.724076		0.859584	0.643367		0.0560404	0.770897		0.219673	0.768656		0.000661188	0.800965
0.316076	0.744427		0.211665	0.744219		0.0468524	0.634356		0.199047	0.741858		0.0626099	0.630236		0.0148867	0.682013		0.624266	0.513425		0.643079	0.633424		0.0427649	0.664592		0.0944828	0.81298		0.424966	0.607427		0.297931	0.570785		0.278629	0.745209		0.435984	0.667273		0.078972	0.778048		0.2267	0.822079		0.0892155	0.75457
0.589519	0.641193		0.233616	0.733357		0.026457	0.61517		0.127794	0.752566		0.160558	0.534222		0.0180875	0.687184		0.622286	0.502174		0.206667	0.700325		0.00791671	0.685465		0.0987908	0.812514		0.695572	0.602283		0.566341	0.523041		0.279981	0.703975		0.536218	0.628588		0.119227	0.761279		0.325751	0.751994		0.071493	0.736812
0.553563	0.647578		0.190667	0.736488		0.461533	0.695518		0.109932	0.737069		0.0724992	0.669838		0.107423	0.67859		0.634082	0.500037		0.188342	0.669779		0.0416161	0.682795		0.0752452	0.773924		0.390006	0.589372		0.199527	0.548103		0.0573112	0.658737		0.259374	0.662495		0.113583	0.740356		0.2147	0.821502		0.0130077	0.742504
0.36141	0.678443		0.193656	0.737598		0.274712	0.697609		0.109065	0.7235		0.0260432	0.712173		0.142457	0.617089		0.626445	0.520159		0.390386	0.691106		0.070323	0.660569		0.0787367	0.795504		0.510786	0.604094		0.262331	0.563409		0.105239	0.738971		0.184747	0.695835		0.0902548	0.712957		0.18644	0.799386		0.0239528	0.726046
0.301175	0.692541		0.47656	0.720868		0.0574411	0.647727		0.110484	0.731401		0.305478	0.51639		0.0215422	0.70388		0.546088	0.534934		0.567763	0.647241		0.00366067	0.70496		0.0601281	0.788583		0.523833	0.539496		0.295915	0.585242		0.0353588	0.709643		0.154694	0.701581		0.111336	0.776891		0.161695	0.799134		0.114462	0.735545
0.355109	0.696457		0.647573	0.671876		0.021727	0.642627		0.104482	0.766688		0.0480065	0.698983		0.016764	0.689801		0.559141	0.516359		0.136794	0.700403		0.00548348	0.697571		0.0636117	0.787675		0.472236	0.572112		0.523492	0.519104		0.114741	0.699763		0.443058	0.646771		0.133532	0.778703		0.156491	0.807897		0.102456	0.772114
0.357527	0.64181		0.239018	0.710754		0.00935521	0.644404		0.0837141	0.749434		0.0680867	0.66623		0.0974817	0.634551		0.564048	0.50103		0.102588	0.694896		0.0154788	0.665496		0.0376131	0.808005		0.447996	0.597218		0.503548	0.557825		0.0875731	0.736793		0.632486	0.632006		0.126358	0.786164		0.166298	0.820828		0.0410187	0.778391
0.388439	0.63969		0.148535	0.736613		0.0223801	0.58824		0.0895054	0.745434		0.14506	0.59935		0.029093	0.718548		0.580022	0.51537		0.473677	0.664007		0.0309543	0.644052		0.0407796	0.822324		0.638169	0.542453		0.187468	0.563865		0.00544807	0.698631		0.414698	0.607635		0.132015	0.77539		0.117491	0.803256		0.0233668	0.74449
0.404645	0.667699		0.166344	0.751549		0.0317379	0.579419		0.0698304	0.740825		0.19553	0.541783		0.0303782	0.742622		0.575555	0.505915		0.568373	0.667353		0.005588	0.654482		0.044671	0.792493		0.605943	0.549129		0.146581	0.607349		0.165226	0.704048		0.500203	0.597367		0.137242	0.766161		0.112207	0.819537		0.0479348	0.725585
0.346908	0.687311		0.208035	0.730794		0.0518403	0.610202		0.0944706	0.729124		0.0641124	0.666504		0.00116017	0.734319		0.607334	0.53865		0.101915	0.684965		0.027499	0.657014		0.155221	0.743337		0.372811	0.561302		0.0402746	0.752845		0.117945	0.713787		0.610833	0.604829		0.104134	0.741937		0.155536	0.827685		0.190219	0.676436
0.391976	0.725673		0.19223	0.734862		0.513452	0.675693		0.0444736	0.71806		0.0437995	0.647393		0.082737	0.675157		0.55295	0.51392		0.312124	0.659883		0.00967311	0.636502		0.170481	0.797755		0.26079	0.588651		0.139275	0.682046		0.184237	0.713417		0.650713	0.590072		0.0447816	0.763285		0.160662	0.826507		0.0905628	0.747707
0.516915	0.624527		0.185341	0.742718		0.474919	0.695404		0.0426174	0.74329		0.192278	0.613295		0.00523308	0.705793		0.54505	0.504658		0.640223	0.601662		0.00481997	0.644491		0.137866	0.785011		0.3724	0.57943		0.26208	0.616484		0.388766	0.709916		0.656089	0.609831		0.099653	0.781301		0.207586	0.833863		0.103443	0.720983
0.588711	0.575691		0.50149	0.712583		0.28334	0.706156		0.036492	0.711022		0.259732	0.579042		0.0102761	0.712928		0.527701	0.500202		0.476928	0.607845		0.0143891	0.595411		0.0817125	0.796234		0.330299	0.56825		0.143042	0.676356		0.0877609	0.703535		0.26257	0.622187		0.113416	0.781455		0.200402	0.824917		0.160628	0.690066
0.983482	0.434002		0.822767	0.698466		0.196659	0.739187		0.0614136	0.72847		0.180894	0.548721		0.129986	0.669163		0.492214	0.511503		0.121122	0.637498		0.044366	0.593809		0.0388761	0.761484		0.265096	0.594361		0.210962	0.634127		0.0191162	0.717912		0.604063	0.635323		0.0903072	0.739624		0.198086	0.830262		0.142515	0.741731
0.884622	0.520621		0.725176	0.674372		0.136499	0.678487		0.0332307	0.747351		0.253135	0.620738		0.0416576	0.722837		0.52386	0.513243		0.106624	0.621957		0.0350498	0.604269		0.0114326	0.735022		0.212364	0.616574		0.332716	0.578871		0.040948	0.676614		0.438483	0.651226		0.0567848	0.752439		0.188993	0.825555		0.0830093	0.7363
0.435808	0.64626		0.397509	0.660046		0.0222038	0.662786		0.0557705	0.733473		0.045335	0.586802		0.105946	0.640557		0.679629	0.516066		0.232073	0.652146		0.0104288	0.65258		0.0172679	0.755111		0.237068	0.546523		0.570869	0.52268		0.195383	0.700599		0.340027	0.582674		0.0109268	0.65496		0.187992	0.815554		0.103124	0.722468
0.291372	0.657406		0.216529	0.756095		0.0331176	0.654754		0.0172885	0.728746		0.163144	0.517158		0.167136	0.611585		0.785266	0.516561		0.400935	0.617484		0.0483871	0.636084		0.0204503	0.753152		0.146913	0.628935		0.224189	0.597091		0.0864937	0.668063		0.258605	0.616042		0.116669	0.624552		0.207784	0.824593		0.145596	0.716579
0.275353	0.710325		0.176302	0.755292		0.447348	0.647225		0.0129719	0.738417		0.549029	0.520723		0.313529	0.587522		0.722015	0.53953		0.161339	0.647458		0.0503825	0.663042		0.0306309	0.768548		0.206672	0.552076		0.35699	0.556014		0.00641168	0.7218		0.297473	0.649588		0.0117787	0.682135		0.228681	0.809994		0.0887993	0.790423
0.258338	0.695004		0.192372	0.730613		0.50946	0.687581		0.0113324	0.712195		0.262285	0.397169		0.230155	0.638258		0.592721	0.519365		0.459528	0.607777		0.0109289	0.676871		0.0386477	0.767556		0.381782	0.583157		0.412064	0.551119		0.00722856	0.734331		0.205555	0.679475		0.0249712	0.754776		0.238037	0.818691		0.115787	0.735908
0.294382	0.71328		0.303572	0.692982		0.214927	0.720948		0.00733375	0.743741		0.047896	0.613197		0.0524975	0.746415		0.562343	0.510669		0.561632	0.655737		0.0359999	0.650446		0.031983	0.740258		0.635592	0.557207		0.24722	0.548527		0.00188323	0.730451		0.107343	0.658583		0.0387784	0.75938		0.228598	0.802223		0.0406144	0.740406
0.643755	0.607027		0.19877	0.729352		0.0132954	0.698364		0.0229337	0.729516		0.0639743	0.722801		0.0117105	0.705338		0.601871	0.514108		0.190753	0.63136		0.0385314	0.665875		0.0617611	0.723521		0.668507	0.592656		0.348628	0.556633		0.0947917	0.681869		0.144207	0.65966		0.00977065	0.77736		0.21521	0.817789		0.0783288	0.75729
0.471357	0.603144		0.433886	0.685114		0.0534461	0.623709		0.0302191	0.716494		0.00381551	0.65904		0.0629821	0.649714		0.624727	0.500455		0.0680534	0.651442		0.0338493	0.637715		0.0613888	0.738257		0.614579	0.568686		0.507681	0.554756		0.437349	0.682055		0.0795541	0.709623		0.0196227	0.730496		0.167471	0.795627		0.0826906	0.761369
0.300144	0.773198		0.401569	0.658625		0.004394	0.672677		0.00768057	0.738594		0.0301987	0.710728		0.117593	0.655901		0.620172	0.47389		0.210033	0.659457		0.0535772	0.646443		0.0521408	0.703546		0.621579	0.56525		0.186442	0.610204		0.378475	0.634882		0.0860812	0.645878		0.000167035	0.727644		0.175454	0.786573		0.0921569	0.74631
0.254332	0.757455		0.0983903	0.812624		0.169239	0.8754		0.00815464	0.868387		0.0204804	0.691631		0.0722063	0.772006		0.101834	0.648324		0.238551	0.733361		0.107618	0.630441		0.0578433	0.798636		0.0437457	0.773272		0.447401	0.747428		0.0200919	0.819917		0.0188643	0.693647		0.000434053	0.835954		0.169322	0.826599		0.0461592	0.729434
0.135272	0.740409		0.104151	0.855356		0.0385275	0.86612		0.0487897	0.853777		0.232504	0.643081		0.127755	0.757143		0.0538201	0.693426		0.12949	0.736712		0.0941917	0.775738		0.0118766	0.854849		0.00202225	0.764664		0.0286666	0.862998		0.0203786	0.832635		0.0213734	0.714338		0.00226645	0.903533		0.0976164	0.901361		0.120194	0.743284
0.0312909	0.757858		0.00216222	0.878292		0.173271	0.807584		0.0189843	0.841182		0.0318449	0.701641		0.107997	0.751649		0.00231132	0.672406		0.00163998	0.730037		0.0544849	0.773034		0.0304148	0.846252		0.052025	0.799903		0.405823	0.810421		0.0241508	0.800902		0.0983134	0.742982		0.00955985	0.910262		0.0768173	0.900138		0.103113	0.740944
0			0			0			0			0			0			0			0			0			0			0			0			0			0			0			0			0
0.0494632	0.734123		0.0937735	0.818189		0.0432897	0.820901		0.138972	0.770958		0.0253176	0.736484		0.102772	0.783473		0.0287145	0.608826		0.0271182	0.748408		0.0314631	0.773243		0.0244611	0.861616		0.0595078	0.775974		0.273754	0.804476		0.0174344	0.838744		0.112297	0.690161		0.00739573	0.914254		0.358114	0.849091		0.156816	0.74445
0.0353944	0.698842		0.0634748	0.839506		0.0228723	0.876137		0.367695	0.713419		0.177177	0.657913		0.0340075	0.739523		0.142869	0.61348		0.0691615	0.755445		0.0168698	0.721216		0.0169885	0.841367		0.0195046	0.74544		0.525771	0.783336		0.0770854	0.841944		0.0982977	0.70337		0.010349	0.895203		0.569099	0.804286		0.0912151	0.744578
0.100514	0.728769		0.0819579	0.828436		0.152525	0.850315		0.447626	0.696522		0.0397257	0.757134		0.103964	0.76801		0.0228095	0.529868		0.054444	0.710208		0.0428274	0.687869		0.000804172	0.868273		0.119738	0.733128		0.508282	0.74359		0.226792	0.796557		0.0632761	0.717004		0.0126486	0.899683		0.615959	0.77848		0.0831444	0.750382
0.025038	0.730443		0.0993794	0.882303		0.0189635	0.876477		0.460146	0.716383		0.104992	0.713865		0.0900164	0.752563		0.24347	0.65847		0.486228	0.745851		0.0549734	0.677137		0.00778337	0.882907		0.2169	0.714272		0.550752	0.748343		0.350828	0.796297		0.0565515	0.724485		0.00709356	0.895932		0.503971	0.791864		0.0894845	0.730236
0.0293969	0.743382		0.0354575	0.817136		0.252409	0.744813		0.471603	0.707753		0.103168	0.701967		0.0496683	0.779624		0.203611	0.633073		0.0364178	0.700908		0.112382	0.684585		0.00564942	0.869959		0.0117911	0.75754		0.621321	0.658114		0.308077	0.789186		0.019798	0.69726		0.0200401	0.878202		0.568549	0.786709		0.00371321	0.762538
0.0258165	0.761094		0.117714	0.838101		0.121259	0.881635		0.482885	0.693793		0.295317	0.652986		0.0698133	0.769135		0.0613418	0.691113		0.000136939	0.780337		0.0467963	0.743196		0.00397443	0.844702		0.0257608	0.767445		0.424257	0.773109		0.0250609	0.828507		8.95818e-05	0.792466		0.0204504	0.901768		0.635791	0.773009		0.0830868	0.731659
0.0455774	0.741205		0.00979434	0.819101		0.114266	0.81671		0.408555	0.713729		0.00911124	0.716582		0.0463573	0.746966		0.0986349	0.643965		0.0244843	0.729702		0.0683913	0.728472		0.00613142	0.854417		0.154654	0.646089		0.590381	0.645975		0.0280995	0.837966		0.147218	0.698119		0.00906105	0.88147		0.583041	0.800212		0.194198	0.757321
0.0432012	0.762436		0.195963	0.799563		0.301291	0.684265		0.478845	0.697982		0.183949	0.603374		0.0252767	0.777492		0.0352061	0.614018		0.0883916	0.663663		0.109745	0.691421		0.0223126	0.820357		0.163232	0.650624		0.662937	0.683477		0.0153183	0.830058		0.0907584	0.688759		0.0270861	0.890194		0.644472	0.756676		0.219096	0.751286
0.0673928	0.768801		0.0394248	0.787937		0.0494811	0.783996		0.460113	0.69812		0.103361	0.709586		0.0752095	0.769463		0.0647773	0.632814		0.0935134	0.761166		0.0950402	0.644195		0.0444973	0.832562		0.116351	0.735308		0.588667	0.659576		0.0898049	0.779199		0.0732728	0.657269		0.0133572	0.888243		0.623615	0.786343		0.13567	0.75631
0.000473592	0.734968		0.132139	0.805229		0.0603923	0.870258		0.323112	0.750535		0.237037	0.612508		0.0518613	0.737812		0.0351989	0.689273		0.0399428	0.74576		0.154948	0.573726		0.0509176	0.828362		0.0108785	0.738575		0.852548	0.629767		0.0182542	0.798489		0.0943896	0.678066		0.00109206	0.882883		0.0649791	0.910653		0.221115	0.758328
0.0072869	0.766566		0.0453523	0.843136		0.0140844	0.898107		0.424613	0.730474		0.0357075	0.738554		0.0398826	0.710014		0.140035	0.593887		0.0121723	0.717671		0.018188	0.690143		0.0276831	0.849569		0.0672891	0.758949		0.596768	0.670656		0.00212381	0.820452		0.0774177	0.68465		0.00373408	0.894335		0.0440274	0.904008		0.0733028	0.786863
0.0399537	0.738916		0.0240162	0.88673		0.0464498	0.823827		0.433886	0.739533		0.106082	0.783954		0.0351619	0.746146		0.0459005	0.506423		0.0312768	0.752157		0.0806912	0.735729		0.0640089	0.851198		0.125394	0.763406		0.724033	0.641893		0.0501715	0.823699		0.119525	0.693623		0.00165664	0.880388		0.0929124	0.904249		0.10173	0.707385
0.0425074	0.710739		0.190282	0.77958		0.191465	0.832383		0.460706	0.718634		0.0307731	0.659596		0.075388	0.735172		0.057597	0.745961		0.0119045	0.736526		0.0710811	0.68093		0.0594671	0.832154		0.0423385	0.778062		0.667575	0.619816		0.0550443	0.819273		0.0196567	0.765309		0.0124987	0.881164		0.490568	0.765026		0.132441	0.723695
0.0205694	0.715049		0.28256	0.814697		0.362567	0.681281		0.453358	0.739874		0.0145191	0.74904		0.0611668	0.758367		0.200135	0.604621		0.221751	0.719165		0.0669663	0.698132		0.0404097	0.832699		0.0222222	0.755216		0.10336	0.805814		0.0756708	0.797208		0.0489215	0.719475		0.00332411	0.883749		0.467766	0.774781		0.0102587	0.716834
0.00159211	0.703689		0.0661995	0.869005		0.186216	0.691164		0.168091	0.837693		0.0228786	0.666864		0.00105449	0.791402		0.0874979	0.688817		0.0237485	0.717535		0.0960066	0.748569		0.038521	0.857355		0.00047928	0.72262		0.508101	0.758525		0.376331	0.806248		0.111032	0.66421		0.00908422	0.868036		0.558477	0.824226		0.00225194	0.69504
0.00750297	0.703556		0.194564	0.749511		0.111738	0.880256		0.383361	0.701637		0.123151	0.730623		0.017574	0.714817		0.044887	0.631409		0.0872696	0.72663		0.0930076	0.717401		0.0275183	0.848545		0.18365	0.641981		0.518458	0.729668		0.0323526	0.789777		0.0360517	0.744993		0.0278172	0.87521		0.317286	0.798241		0.0231477	0.733254
0.0455038	0.718485		0.26936	0.747556		0.143243	0.790483		0.363759	0.762363		0.126759	0.659241		0.0232558	0.769582		0.0220748	0.647986		0.138502	0.676332		0.108025	0.739077		0.0138352	0.831599		0.0722845	0.75643		0.613049	0.659687		0.058598	0.806684			0.689982		0.0107448	0.871523		0.6375	0.752716		0.00116539	0.718541
0.0426989	0.735021		0.112988	0.722027		0.139543	0.775032		0.452836	0.719616		0.0680885	0.720713		0.0231206	0.710988		0.0851	0.489895		0.304235	0.682366		0.0313211	0.651948		0.0104386	0.834096		0.00777141	0.69742		0.706709	0.618337		0.0770053	0.814907		0.148328	0.70549		0.00052915	0.872114		0.655861	0.774637		0.0142127	0.715078
0.114197	0.664012		0.0164994	0.754266		0.0155047	0.841247		0.432596	0.74476		0.124661	0.774875		0.0805498	0.701336		0.0701889	0.629005		0.0668939	0.750596		0.0758599	0.70515		0.0449411	0.76043		0.0573171	0.722718		0.900354	0.585595		0.0035595	0.81179		0.0338651	0.661722		0.0169073	0.879097		0.692974	0.778729		0.0179764	0.712281
0.104212	0.753168		0.019167	0.870987		0.108477	0.834721		0.386954	0.765217		0.0880108	0.73993		0.106206	0.72827		0.099432	0.594187		0.0882522	0.681604		0.0647491	0.670502		0.093243	0.810477		0.157908	0.662273		0.420971	0.671288		0.214597	0.787799			0.660189		0.000910922	0.874687		0.355685	0.811796		0.00197096	0.711694
0.0237864	0.708213		0.139207	0.791324		0.361648	0.643684		0.447145	0.708456		0.0736555	0.67032		0.0593856	0.732481		0.0476695	0.634906		0.0795123	0.737567		0.1279	0.712522		0.102055	0.799011		0.0243824	0.696226		0.00584299	0.803376		0.104729	0.819168		0.112175	0.695802		0.0140339	0.865582		0.482327	0.793746		0.0215252	0.726637
0.00957896	0.710298		0.0374314	0.835605		0.375124	0.617645		0.483489	0.696188		0.0788256	0.72182		0.0383131	0.701382		0.245548	0.566625		0.0131821	0.714749		0.131828	0.718035		0.0829009	0.796336		0.0646501	0.7018		0.49902	0.760754		0.0707469	0.809219		0.0821444	0.732308		0.0306922	0.873602		0.691041	0.74349		0.0288467	0.71557
0.0754975	0.670049		0.41294	0.800997		0.3774	0.637511		0.472211	0.732298		0.295685	0.710012		0.032463	0.71313		0.148174	0.571776		0.106554	0.679726		0.140032	0.654279		0.10689	0.789517		0.042614	0.710036		0.529643	0.71832		0.0648446	0.812725		0.274579	0.663942		0.00101502	0.868105		0.70279	0.779503		0.0185934	0.722648
0.953376	0.548666		0.882061	0.754258		0.358126	0.679092		0.440172	0.711306		0.0151933	0.732652		0.0588463	0.75219		0.0104012	0.70705		0.400505	0.731299		0.0838478	0.671367		0.0685554	0.802805		0.0235088	0.764006		0.529861	0.704217		0.0277553	0.827045		0.251799	0.632619		0.00277279	0.858536		0.384598	0.796386		0.0508037	0.706235
0.894058	0.58614		0.790881	0.764678		0.348923	0.68909		0.46073	0.700943		0.203932	0.729931		0.112694	0.697933		0.139108	0.577044		0.00174063	0.731969		0.0840728	0.725425		0.043973	0.828608		0.213476	0.616769		0.599317	0.654707		0.100512	0.801966		0.0225808	0.685698		0.0167496	0.868472		0.665208	0.741834		0.075744	0.65388
0.579681	0.648485		0.576862	0.741683		0.361523	0.640782		0.325842	0.732073		0.024092	0.722867		0.0576898	0.646005		0.243308	0.550425		0.0215838	0.718254		0.117736	0.711783		0.03268	0.845612		0.163091	0.650636		0.547013	0.660409		0.0221698	0.826531		0.176067	0.681656		0.0213707	0.85484		0.644374	0.702439		0.0254046	0.729051
0.759824	0.638089		0.605198	0.691321		0.233019	0.68578		0.120789	0.782917		0.0658582	0.609892		0.242401	0.667575		0.843883	0.510154		0.194985	0.745003		0.0304995	0.539012		0.0753077	0.736627		0.826024	0.618458		0.536434	0.71304		0.737358	0.696614		0.921618	0.598293		0.0845957	0.755071		0.379284	0.677776		0.0766217	0.704275
0.657994	0.63734		0.917053	0.710504		0.285571	0.744301		0.273048	0.797223		0.0450417	0.638476		0.223386	0.727175		0.75735	0.504372		0.759712	0.708265		0.128624	0.545824		0.0909084	0.804867		0.79661	0.625058		0.649768	0.657122		0.345284	0.770849		0.94917	0.632814		0.085499	0.745349		0.0429239	0.782869		0.0995708	0.704617
0.375441	0.644359		0.840123	0.703946		0.151441	0.774306		0.171203	0.823063		0.204934	0.589132		0.174461	0.713861		0.669835	0.509986		0.225465	0.731071		0.235821	0.557257		0.0981864	0.809174		0.771974	0.596044		0.769548	0.604666		0.273928	0.721852		0.86638	0.626037		0.105828	0.744142		0.0450476	0.776756		0.102036	0.703037
0.378646	0.714503		0.555356	0.717338		0.0780416	0.738495		0.0355358	0.678933		0.0874514	0.628477		0.160745	0.694324		0.608798	0.456175		0.131749	0.760624		0.161344	0.547034		0.113105	0.816784		0.763199	0.598129		0.632755	0.65789		0.146383	0.748044		0.840454	0.619084		0.136781	0.740797		0.0478608	0.764088		0.0988901	0.686854
0.489033	0.602896		0.205345	0.726928		0.204266	0.674035		0.00403149	0.696384		0.160469	0.628239		0.183028	0.700972		0.633011	0.470037		0.307749	0.698138		0.0522533	0.572553		0.122794	0.771644		0.773429	0.608724		0.711962	0.64151		0.165871	0.760294		0.572105	0.612517		0.128467	0.723802		0.082417	0.796233		0.107437	0.712897
0.386472	0.66396		0.198202	0.747559		0.224192	0.631438		3.57504e-06	0.68797		0.116125	0.673075		0.0998278	0.717928		0.635794	0.48687		0.499024	0.698699		0.209046	0.554213		0.0969576	0.79687		0.596295	0.579191		0.806301	0.588966		0.0935552	0.742868		0.984253	0.604077		0.0768348	0.768804		0.161768	0.772872		0.103977	0.695244
0.369403	0.658665		0.292556	0.754197		0.249299	0.591967		0.248374	0.764035		0.0201439	0.593087		0.19311	0.724133		0.615421	0.478233		0.473922	0.720062		0.176392	0.664995		0.106644	0.824954		0.765965	0.600789		0.586416	0.66893		0.13809	0.786797		0.957898	0.655975		0.0464806	0.769982		0.142855	0.776332		0.103774	0.708319
0.347367	0.679039		0.209502	0.755427		0.220123	0.658064		0.180063	0.763272		0.0944549	0.658469		0.122884	0.731053		0.621955	0.46577		0.644719	0.704147		0.0972499	0.698786		0.124898	0.820077		0.476991	0.623127		0.703754	0.595846		0.30278	0.752021		0.534297	0.646537		0.0694121	0.779659		0.149883	0.816683		0.0138976	0.73766
0.62081	0.619165		0.231454	0.776394		0.146814	0.64085		0.108809	0.790099		0.192403	0.487009		0.0899096	0.728922		0.619975	0.452131		0.208307	0.738492		0.0624017	0.643432		0.129206	0.798741		0.747597	0.604345		0.972165	0.538079		0.304132	0.735055		0.634531	0.602496		0.109667	0.765108		0.248934	0.758034		0.0316202	0.696619
0.584854	0.624453		0.188505	0.720152		0.288262	0.77925		0.0909476	0.777294		0.0406543	0.663274		0.000573841	0.709595		0.631771	0.465119		0.189982	0.713942		0.0128688	0.677891		0.10566	0.805781		0.442031	0.56315		0.60535	0.571331		0.081462	0.725043		0.357687	0.651284		0.104023	0.754053		0.137883	0.811623		0.0901054	0.69191
0.392701	0.625828		0.191494	0.760309		0.101442	0.771643		0.0900803	0.741239		0.0058017	0.578918		0.0344597	0.718211		0.624134	0.477522		0.392026	0.719807		0.0158381	0.654389		0.109152	0.781224		0.562811	0.586646		0.668155	0.56679		0.12939	0.739276		0.28306	0.675979		0.080695	0.730314		0.109623	0.803522		0.127066	0.68112
0.332465	0.679314		0.474398	0.729277		0.230712	0.660432		0.0915001	0.704215		0.337323	0.535382		0.086455	0.723156		0.543776	0.504535		0.569403	0.692256		0.0581456	0.705414		0.090543	0.777023		0.575858	0.532746		0.701738	0.586267		0.0595096	0.711878		0.253008	0.656917		0.101776	0.801813		0.084878	0.79495		0.217575	0.677269
0.3864	0.589529		0.645411	0.673732		0.151544	0.680848		0.0854981	0.750048		0.0161616	0.672449		0.0912332	0.737467		0.55683	0.477239		0.138434	0.738682		0.0490015	0.677047		0.0940265	0.797877		0.524261	0.570286		0.929316	0.563688		0.138892	0.775135		0.541371	0.620913		0.123972	0.789528		0.0796732	0.810178		0.205569	0.682849
0.388818	0.633291		0.236856	0.708102		0.163916	0.677552		0.0647299	0.743989		0.0362418	0.705		0.0105155	0.730984		0.561737	0.491073		0.104228	0.711396		0.0699637	0.649676		0.0680279	0.831537		0.500021	0.602371		0.909371	0.586957		0.111724	0.750601		0.7308	0.625014		0.116798	0.792883		0.0894808	0.807852		0.144132	0.690899
0.41973	0.614843		0.146373	0.741078		0.195651	0.626705		0.0705211	0.732135		0.176905	0.527352		0.0789042	0.658526		0.577711	0.473081		0.475317	0.71556		0.0854392	0.626765		0.0711944	0.83363		0.690194	0.53686		0.593292	0.589449		0.0295989	0.719592		0.513011	0.640687		0.122455	0.773431		0.0406738	0.814262		0.12648	0.667052
0.435936	0.609957		0.164182	0.758435		0.205009	0.592875		0.0508461	0.715943		0.227375	0.60414		0.077619	0.700921		0.573244	0.474495		0.570013	0.718925		0.0600729	0.595906		0.0750859	0.789164		0.657968	0.527918		0.259242	0.642165		0.189377	0.755465		0.598516	0.611507		0.127682	0.774706		0.0353893	0.818138		0.0551784	0.675247
0.378199	0.649698		0.205873	0.755784		0.225111	0.606648		0.0754863	0.701771		0.0322675	0.654298		0.106837	0.687303		0.605023	0.494114		0.103555	0.725597		0.0819839	0.586726		0.185636	0.802216		0.424836	0.560529		0.365549	0.733152		0.142096	0.726282		0.709146	0.631238		0.0945739	0.740067		0.0787185	0.831932		0.0871057	0.682873
0.423267	0.634933		0.190068	0.760821		0.340182	0.766674		0.0254893	0.698025		0.0119545	0.661706		0.0252602	0.670688		0.550638	0.468293		0.313764	0.709303		0.0448118	0.617105		0.200896	0.785161		0.312815	0.530977		0.545098	0.679844		0.208387	0.739858		0.749026	0.609053		0.0352217	0.770484		0.0838447	0.827999		0.0125503	0.674187
0.548206	0.58249		0.183179	0.775834		0.301649	0.748869		0.0236332	0.713546		0.224123	0.54499		0.11323	0.722536		0.542739	0.475374		0.641863	0.639731		0.0593049	0.628177		0.168281	0.777312		0.424425	0.565865		0.667904	0.646708		0.412917	0.736602		0.754402	0.636345		0.0900931	0.791583		0.130769	0.847759		0.000329961	0.69472
0.620002	0.559457		0.499328	0.716789		0.110069	0.76202		0.0175077	0.684909		0.291577	0.603824		0.118273	0.671139		0.52539	0.457913		0.478568	0.646916		0.068874	0.590586		0.112127	0.81614		0.382324	0.548415		0.548865	0.667265		0.111912	0.737525		0.360884	0.648698		0.103856	0.784645		0.123584	0.836976		0.0575151	0.625254
1.01477	0.444973		0.820605	0.700011		0.023388	0.7924		0.0424294	0.700963		0.212739	0.670319		0.021989	0.667114		0.489903	0.4604		0.122762	0.67116		0.0988509	0.559095		0.0692909	0.765809		0.317121	0.556546		0.616785	0.645746		0.043267	0.770537		0.702376	0.649714		0.0807474	0.748006		0.121268	0.836402		0.0394023	0.737619
0.915912	0.534661		0.723014	0.67082		0.0367715	0.743875		0.0142465	0.713923		0.28498	0.570311		0.149655	0.727828		0.521549	0.459333		0.108264	0.668532		0.0895347	0.587542		0.0418474	0.787795		0.264389	0.564358		0.73854	0.606369		0.0650988	0.726527		0.536796	0.648882		0.0472249	0.764353		0.112176	0.833649		0.0201038	0.668293
0.467099	0.625467		0.395346	0.67574		0.195475	0.678376		0.0367863	0.717946		0.0771799	0.580806		0.00205164	0.72444		0.677318	0.486785		0.233713	0.686372		0.0649138	0.627225		0.0476827	0.749146		0.289093	0.534277		0.976692	0.558517		0.219534	0.733675		0.43834	0.598983		0.00136692	0.690443		0.111175	0.827585		1.08401e-05	0.692164
0.322663	0.645024		0.214367	0.759584		0.140153	0.695403		0.00169572	0.704092		0.194989	0.530428		0.0591393	0.627498		0.782955	0.509129		0.402575	0.671401		0.102872	0.582389		0.0508651	0.776834		0.198938	0.607941		0.630013	0.605903		0.110644	0.700236		0.356919	0.613542		0.126229	0.623818		0.130966	0.823606		0.0424828	0.65701
0.306643	0.644671		0.17414	0.752868		0.274077	0.728349		0.00601241	0.704513		0.580874	0.544413		0.205532	0.624058		0.719704	0.48293		0.162979	0.696735		0.104867	0.641251		0.0610457	0.750692		0.258697	0.510008		0.762814	0.570302		0.0305625	0.729774		0.395786	0.632717		0.00221889	0.687005		0.151864	0.827509		0.0143138	0.695998
0.289629	0.670516		0.19021	0.736754		0.336189	0.757208		0.00765187	0.689257		0.29413	0.421866		0.122158	0.625787		0.59041	0.496572		0.461168	0.655471		0.0654138	0.639374		0.0690625	0.785876		0.433807	0.587085		0.817887	0.569975		0.0169222	0.753103		0.303868	0.693448		0.0154113	0.757982		0.161219	0.819514		0.0126737	0.686874
0.325672	0.628398		0.30141	0.719993		0.0416565	0.767465		0.0116505	0.727851		0.0160511	0.556495		0.160495	0.669472		0.560031	0.482658		0.563272	0.676372		0.0904849	0.622915		0.0623978	0.770433		0.687617	0.536558		0.653043	0.562585		0.026034	0.756322		0.205656	0.693594		0.0292186	0.756149		0.151781	0.811741		0.0624988	0.682031
0.675046	0.57873		0.196607	0.747641		0.159975	0.714725		0.00394947	0.703099		0.0321294	0.673921		0.0962867	0.689639		0.59956	0.468054		0.192393	0.640814		0.0930164	0.635558		0.092176	0.741441		0.720532	0.572261		0.754451	0.567041		0.118943	0.73742		0.242521	0.65917		0.000210803	0.76552		0.138392	0.81656		0.0247844	0.736052
0.502648	0.580809		0.431724	0.707668		0.226717	0.666674		0.0112348	0.712017		0.0280294	0.660811		0.0450151	0.702886		0.622416	0.461798		0.0696934	0.689272		0.0883343	0.617416		0.030974	0.745311		0.666604	0.555622		0.913505	0.586915		0.4615	0.720418		0.177868	0.677467		0.0100628	0.735187		0.0906535	0.792609		0.0204225	0.678755
0.331435	0.687058		0.399406	0.672246		0.168877	0.685047		0.0266648	0.714396		0.00164626	0.682457		0.00959543	0.68774		0.617861	0.451965		0.211673	0.698935		0.108062	0.610247		0.021726	0.742095		0.673604	0.548158		0.592266	0.620288		0.402625	0.704392		0.184395	0.699878		0.00939281	0.749681		0.098637	0.784967		0.0109562	0.691906
0.204868	0.727767		0.192164	0.801169		0.212529	0.820935		0.130817	0.811561		0.045798	0.653589		0.030566	0.850261		0.0731197	0.715001		0.265669	0.709075		0.139082	0.710149		0.0823044	0.847019		0.103254	0.753918		0.173647	0.75396		0.0375263	0.844028		0.0934327	0.692991		0.00782979	0.845456		0.188791	0.738343		0.202975	0.740696
0.0858084	0.686633		0.197925	0.80483		0.0818171	0.866856		0.187761	0.814482		0.257821	0.648666		0.0249826	0.823646		0.0251057	0.699086		0.156608	0.695495		0.125655	0.811213		0.0363377	0.846753		0.0574855	0.767268		0.30242	0.803422		0.037813	0.857712		0.0909236	0.772658		0.00966219	0.903501		0.45573	0.822189		0.27701	0.730902
0.0181723	0.774686		0.0916113	0.842961		0.129981	0.755015		0.119987	0.774468		0.0571625	0.71533		0.00522489	0.857414		0.0310258	0.689368		0.0287582	0.673732		0.0859481	0.773676		0.0548759	0.875832		0.111533	0.782401		0.13207	0.856382		0.00671635	0.820144		0.21061	0.665058		0.0169556	0.906146		0.434931	0.83827		0.259929	0.704738
0.0494632	0.734123		0.0937735	0.818189		0.0432897	0.820901		0.138972	0.770958		0.0253176	0.736484		0.102772	0.783473		0.0287145	0.608826		0.0271182	0.748408		0.0314631	0.773243		0.0244611	0.861616		0.0595078	0.775974		0.273754	0.804476		0.0174344	0.838744		0.112297	0.690161		0.00739573	0.914254		0.358114	0.849091		0.156816	0.74445
0			0			0			0			0			0			0			0			0			0			0			0			0			0			0			0			0
0.0140689	0.786031		0.0302987	0.811275		0.0661619	0.833603		0.228723	0.824398		0.202495	0.652274		0.0687648	0.788635		0.171583	0.592332		0.0420433	0.751478		0.0145933	0.771255		0.00747261	0.861017		0.0790124	0.770463		0.252018	0.805029		0.059651	0.875676		0.0139993	0.715207		0.0177447	0.932517		0.210986	0.811507		0.248031	0.739514
0.0510512	0.709309		0.175731	0.796423		0.109235	0.811444		0.308654	0.782917		0.0650433	0.787057		0.00119127	0.847976		0.005905	0.713418		0.0815622	0.704956		0.0113643	0.701		0.0252652	0.896655		0.0602305	0.701033		0.234528	0.74536		0.209358	0.83013		0.0490209	0.740158		0.0200443	0.934243		0.257845	0.781076		0.239961	0.713727
0.0244253	0.745411		0.193153	0.837831		0.0622532	0.856852		0.321174	0.753518		0.079674	0.695444		0.0127559	0.861283		0.214755	0.683605		0.513346	0.682424		0.0235103	0.749341		0.0166777	0.855244		0.157393	0.716905		0.276998	0.74642		0.333394	0.835759		0.0557455	0.757029		0.0144893	0.927542		0.145857	0.806184		0.246301	0.71582
0.0788602	0.727108		0.0583159	0.849001		0.209119	0.682092		0.332631	0.742089		0.0778505	0.719237		0.053104	0.778104		0.174897	0.67093		0.063536	0.687226		0.0809191	0.686743		0.0188117	0.872993		0.0712989	0.775402		0.347567	0.61855		0.290643	0.859737		0.092499	0.643813		0.0126444	0.910802		0.210435	0.800961		0.153103	0.716631
0.0236467	0.791356		0.0239409	0.843134		0.164549	0.841701		0.343914	0.735068		0.320635	0.655753		0.032959	0.816878		0.0326273	0.639407		0.0272551	0.745862		0.0153332	0.72862		0.0284355	0.850369		0.033747	0.718862		0.150503	0.770958		0.0424953	0.826156		0.112207	0.700228		0.0278462	0.926664		0.277677	0.720774		0.0737295	0.740443
0.0950407	0.739969		0.0839791	0.798276		0.070976	0.818892		0.269583	0.791542		0.0344289	0.766616		0.056415	0.820582		0.0699204	0.643674		0.0026339	0.773924		0.0369282	0.712525		0.0183297	0.888375		0.0951462	0.682879		0.316628	0.651104		0.0455339	0.869697		0.0349205	0.697768		0.0164568	0.896752		0.224927	0.796992		0.0373817	0.740602
0.0926645	0.741476		0.289737	0.766114		0.258001	0.732927		0.339874	0.762529		0.209267	0.639754		0.0774956	0.832512		0.0639206	0.637482		0.0612734	0.647187		0.0782818	0.733345		0.00214848	0.851466		0.103724	0.684741		0.389183	0.653254		0.0327527	0.86285		0.0215386	0.663479		0.0344819	0.919269		0.286358	0.762223		0.0622798	0.798732
0.0179296	0.801341		0.133198	0.83283		0.0061914	0.849416		0.321141	0.757176		0.128678	0.688297		0.0275628	0.799589		0.0934918	0.688938		0.0663952	0.708371		0.0635771	0.71185		0.0200363	0.87636		0.175859	0.759427		0.314913	0.62476		0.107239	0.815678		0.0390242	0.742073		0.0207529	0.914137		0.265501	0.737341		0.0211465	0.827056
0.0489897	0.759078		0.225913	0.78352		0.103682	0.870288		0.184141	0.808138		0.262354	0.626613		0.050911	0.795448		0.00648446	0.666443		0.0128246	0.708888		0.123485	0.625064		0.0264565	0.854246		0.0486293	0.711465		0.578794	0.555979		0.000819736	0.841613		0.0179074	0.723093		0.00630367	0.909996		0.423093	0.82397		0.0642987	0.803043
0.0421763	0.751767		0.0484212	0.824743		0.057374	0.835882		0.285642	0.786498		0.0610251	0.691269		0.0628897	0.802345		0.168749	0.550701		0.0392905	0.699195		0.0132751	0.691344		0.003222	0.846851		0.00778132	0.761653		0.323014	0.649846		0.0195583	0.812213		0.0348793	0.710802		0.0111298	0.905255		0.314086	0.845292		0.0835135	0.76815
0.0894169	0.689414		0.11779	0.806856		0.0031601	0.811925		0.294915	0.75013		0.0807639	0.776394		0.0676104	0.770851		0.074615	0.661923		0.0041586	0.686684		0.0492281	0.717475		0.0395478	0.879335		0.0658858	0.725592		0.450279	0.566907		0.032737	0.870021		0.00722825	0.759586		0.00905237	0.905219		0.265201	0.851602		0.0550862	0.755661
0.00695582	0.708777		0.0965085	0.803045		0.148176	0.792284		0.321734	0.747579		0.00545552	0.694509		0.0273843	0.830022		0.0863115	0.588702		0.0152137	0.720093		0.039618	0.715632		0.0350061	0.845754		0.101846	0.766235		0.393821	0.558658		0.0376099	0.853607		0.131954	0.678109		0.00510294	0.901633		0.132454	0.814742		0.0243751	0.745547
0.0288939	0.758317		0.376334	0.791484		0.319277	0.684048		0.314387	0.765561		0.0107985	0.690889		0.0416055	0.786867		0.17142	0.639213		0.248869	0.712257		0.0355032	0.685803		0.0159486	0.855994		0.0372856	0.724644		0.170394	0.794542		0.0582364	0.810978		0.0633755	0.707353		0.0107198	0.906016		0.109652	0.728715		0.146558	0.720374
0.0510554	0.728226		0.159973	0.821626		0.142926	0.717817		0.0291198	0.789189		0.00243896	0.650786		0.101718	0.732088		0.0587834	0.626602		0.0508667	0.670358		0.0645435	0.718583		0.0140599	0.830387		0.0590285	0.731219		0.234347	0.699957		0.358897	0.857655		0.00126547	0.697658		0.00168849	0.898672		0.200363	0.847899		0.159068	0.733228
0.0419603	0.750566		0.288338	0.765848		0.155027	0.848567		0.24439	0.8011		0.0978339	0.795222		0.0851983	0.746678		0.0736015	0.59891		0.114388	0.687604		0.0615445	0.707774		0.00305721	0.875794		0.124142	0.645123		0.244704	0.710681		0.0149182	0.850303		0.148349	0.680467		0.0204215	0.879244		0.0408275	0.768822		0.133669	0.738257
0.094967	0.697972		0.363134	0.721422		0.0999534	0.732289		0.224787	0.755911		0.101441	0.772546		0.0795164	0.775251		0.00663966	0.6344		0.16562	0.66688		0.0765619	0.690055		0.0382963	0.85238		0.131792	0.749444		0.339295	0.611952		0.0760324	0.820381			0.657579		0.00334906	0.886547		0.279386	0.769521		0.155651	0.721299
0.0921621	0.713768		0.206761	0.671044		0.0962532	0.73222		0.313865	0.791443		0.0427709	0.791625		0.125893	0.741605		0.113814	0.625133		0.331353	0.670143		0.000142002	0.637561		0.0140225	0.871414		0.0672792	0.728302		0.432956	0.551004		0.0944397	0.846359		0.0360309	0.656711		0.00792489	0.892544		0.297747	0.778217		0.171029	0.674725
0.16366	0.73564		0.0772741	0.779746		0.0277849	0.860363		0.293624	0.80512		0.0993432	0.766046		0.0222225	0.789157		0.0989034	0.510197		0.0940121	0.736149		0.0443968	0.68476		0.02048	0.803078		0.116825	0.730018		0.6266	0.525797		0.020994	0.873294		0.146162	0.762687		0.0095116	0.894348		0.334861	0.758765		0.174793	0.688687
0.153675	0.737526		0.0746065	0.776611		0.0651874	0.807204		0.247982	0.794538		0.113328	0.660956		0.0034337	0.828487		0.0707176	0.660264		0.061134	0.655318		0.033286	0.679903		0.0687819	0.796783		0.0984001	0.672912		0.147217	0.659562		0.197162	0.847757			0.726698		0.00830666	0.892495		0.00242875	0.736417		0.158787	0.683591
0.0732497	0.708708		0.0454339	0.798618		0.318358	0.650559		0.308173	0.779719		0.0989731	0.726431		0.0433867	0.778403		0.076384	0.566453		0.0523941	0.749845		0.0964368	0.694875		0.0775937	0.840423		0.0838902	0.724833		0.267911	0.849766		0.0872942	0.86213		0.000122106	0.743603		0.00663813	0.894344		0.124213	0.826374		0.135291	0.768989
0.0590422	0.708805		0.131205	0.797291		0.331834	0.650398		0.344517	0.768638		0.104143	0.747149		0.0644592	0.772632		0.274262	0.544695		0.0403004	0.692938		0.100365	0.696376		0.0584398	0.834915		0.00514236	0.757603		0.225266	0.798733		0.0881813	0.832542		0.194441	0.683037		0.0232964	0.886711		0.332927	0.74706		0.185663	0.699906
0.124961	0.689582		0.506714	0.763798		0.33411	0.617647		0.333239	0.760748		0.321002	0.67283		0.0703093	0.734997		0.11946	0.620974		0.0794354	0.673572		0.108569	0.66139		0.0824287	0.828009		0.0168938	0.732066		0.25589	0.698071		0.0822791	0.832174		0.162282	0.714301		0.00638071	0.891985		0.344676	0.740017		0.138223	0.694182
0.903912	0.548044		0.975835	0.757576		0.314836	0.622552		0.301201	0.759902		0.0101244	0.715021		0.043926	0.783701		0.0391157	0.562249		0.427623	0.669417		0.0523847	0.683404		0.0440944	0.771029		0.0830166	0.718295		0.256107	0.693137		0.0451898	0.845355		0.364096	0.709013		0.00462294	0.86766		0.0264842	0.775557		0.106013	0.690744
0.844594	0.578439		0.884655	0.755121		0.305633	0.636854		0.321758	0.743631		0.22925	0.687875		0.00992169	0.776198		0.167822	0.56112		0.0253776	0.69999		0.0526097	0.664519		0.0195119	0.807201		0.153968	0.662418		0.325564	0.620133		0.117946	0.798695		0.134878	0.699597		0.00935389	0.886428		0.307094	0.717494		0.0810723	0.646486
0.530218	0.664284		0.670636	0.763634		0.318234	0.666919		0.186871	0.702646		0.00122562	0.690446		0.0450825	0.73672		0.214593	0.590582		0.048702	0.700707		0.0862728	0.688098		0.00821889	0.834289		0.222599	0.669814		0.273259	0.58936		0.00473539	0.828278		0.288364	0.746044		0.013975	0.875071		0.28626	0.660397		0.131412	0.707546
0.710361	0.657484		0.698971	0.649468		0.276309	0.675002		0.25976	0.673642		0.0405405	0.623209		0.139629	0.769349		0.815168	0.545459		0.222103	0.696791		0.0619626	0.617505		0.0997687	0.712716		0.885531	0.598428		0.26268	0.725062		0.719924	0.744099		1.03391	0.60349		0.0771999	0.764754		0.0211697	0.654948		0.233438	0.687224
0.60853	0.624061		1.01083	0.684492		0.32886	0.70371		0.412019	0.725351		0.0197241	0.637504		0.120614	0.812896		0.728636	0.5587		0.78683	0.690057		0.0971606	0.597667		0.115369	0.788415		0.856118	0.593463		0.376014	0.615301		0.32785	0.794806		1.06147	0.593318		0.0781033	0.762127		0.401038	0.724025		0.256387	0.67008
0.325978	0.6436		0.933896	0.681688		0.19473	0.733649		0.310174	0.7725		0.230251	0.597392		0.0716884	0.80773		0.64112	0.53158		0.252583	0.695467		0.204357	0.572803		0.122647	0.787713		0.831482	0.580099		0.495795	0.577588		0.256494	0.762852		0.978677	0.575808		0.0984326	0.762448		0.313066	0.721962		0.258852	0.686992
0.329182	0.693598		0.649129	0.67127		0.034752	0.717944		0.103436	0.801663		0.112769	0.639094		0.0579726	0.743134		0.580083	0.525618		0.158867	0.687368		0.129881	0.588973		0.137566	0.824748		0.822707	0.572007		0.359001	0.607219		0.128948	0.764299		0.952751	0.568995		0.129386	0.749725		0.310253	0.702034		0.255706	0.664589
0.43957	0.667031		0.299118	0.729074		0.160976	0.68989		0.143003	0.628708		0.185787	0.618401		0.080256	0.771533		0.604296	0.542461		0.334867	0.652453		0.0837164	0.638617		0.147255	0.766793		0.832937	0.590288		0.438208	0.627192		0.148436	0.761747		0.684402	0.542162		0.121071	0.742262		0.275697	0.735263		0.264253	0.68311
0.337009	0.690107		0.291976	0.71116		0.180902	0.599774		0.138968	0.748939		0.0908074	0.691045		0.00294449	0.717848		0.60708	0.539179		0.526142	0.661308		0.240509	0.617544		0.121419	0.757989		0.655802	0.561425		0.532547	0.530556		0.0761208	0.75206		1.09655	0.589303		0.0694391	0.782571		0.196346	0.709221		0.260793	0.686785
0.31994	0.656273		0.38633	0.687116		0.206009	0.542369		0.387346	0.69436		0.00517373	0.63349		0.090338	0.790752		0.586706	0.538278		0.50104	0.667349		0.207855	0.680727		0.131105	0.804141		0.825473	0.578809		0.312662	0.61347		0.120655	0.774692		1.07019	0.598111		0.0390848	0.794147		0.215258	0.722497		0.260591	0.681517
0.297903	0.690005		0.303276	0.696491		0.176834	0.637106		0.319035	0.725996		0.119772	0.700085		0.0201116	0.70634		0.59324	0.525464		0.671838	0.676619		0.128713	0.69161		0.149359	0.836504		0.536498	0.603381		0.430001	0.553537		0.285346	0.794907		0.646594	0.52914		0.0620164	0.793151		0.208231	0.760499		0.170714	0.677056
0.571346	0.632006		0.325228	0.723755		0.103524	0.607697		0.247781	0.720099		0.21772	0.54557		0.0128627	0.722154		0.59126	0.537287		0.235425	0.676789		0.0938648	0.689867		0.153667	0.815379		0.807105	0.568961		0.698411	0.501817		0.286698	0.7708		0.746828	0.574878		0.102271	0.797158		0.10918	0.728041		0.188436	0.707112
0.53539	0.635804		0.282279	0.692129		0.331551	0.743147		0.229919	0.719351		0.0153367	0.656122		0.102198	0.722852		0.603056	0.531203		0.2171	0.688432		0.0443319	0.706282		0.130121	0.770408		0.501539	0.564279		0.331597	0.53051		0.0640276	0.76318		0.469984	0.579243		0.0966274	0.773171		0.220231	0.76277		0.246922	0.65648
0.343238	0.659389		0.285267	0.724659		0.144731	0.757057		0.229052	0.715293		0.0311193	0.586439		0.137232	0.658696		0.595419	0.537986		0.419144	0.669139		0.015625	0.681846		0.133613	0.77674		0.622319	0.571831		0.394401	0.550238		0.111955	0.799938		0.395357	0.581408		0.0732992	0.751391		0.248491	0.735504		0.283882	0.6545
0.283002	0.64209		0.568171	0.689241		0.187422	0.672573		0.230472	0.671677		0.36264	0.555337		0.0163173	0.737565		0.515062	0.538907		0.596521	0.683401		0.0896087	0.72244		0.115004	0.778341		0.635366	0.512018		0.427984	0.545838		0.0420751	0.754321		0.365305	0.611724		0.0943806	0.81745		0.273236	0.732975		0.374391	0.644529
0.336937	0.648994		0.739184	0.679578		0.108254	0.630217		0.22447	0.705475		0.00915602	0.692042		0.0115391	0.721142		0.528115	0.523968		0.165552	0.669191		0.0804646	0.713063		0.118488	0.788852		0.583769	0.524511		0.655562	0.488374		0.121458	0.743926		0.653668	0.556875		0.116576	0.810614		0.278441	0.752866		0.362386	0.643685
0.339355	0.675208		0.330629	0.686957		0.120626	0.633651		0.203701	0.699256		0.0109242	0.674103		0.0922568	0.645627		0.533022	0.520964		0.131347	0.702063		0.101427	0.663348		0.092489	0.813359		0.559529	0.589428		0.635618	0.510507		0.0942895	0.764641		0.843097	0.568022		0.109402	0.811462		0.268633	0.74675		0.300948	0.655996
0.370267	0.656387		0.240146	0.715388		0.152361	0.649443		0.209493	0.698457		0.202223	0.533952		0.0238681	0.730849		0.548996	0.51412		0.502435	0.667367		0.116902	0.659495		0.0956555	0.846946		0.749702	0.528885		0.319538	0.538057		0.0121644	0.735579		0.625308	0.556188		0.115059	0.797906		0.31744	0.753464		0.283296	0.634693
0.386473	0.598208		0.257955	0.730541		0.161719	0.620203		0.189818	0.676372		0.252693	0.624318		0.0251533	0.754995		0.544529	0.53209		0.597131	0.660407		0.0915361	0.65683		0.0995469	0.772775		0.717476	0.548374		0.0145113	0.584088		0.171942	0.794493		0.710813	0.580906		0.120286	0.791222		0.322725	0.757995		0.211995	0.631412
0.328736	0.635206		0.299646	0.712874		0.181821	0.619975		0.214458	0.6789		0.0069499	0.647363		0.00406472	0.750457		0.576308	0.541103		0.130673	0.680898		0.113447	0.650286		0.210097	0.765659		0.484343	0.555876		0.091795	0.739621		0.124662	0.754356		0.821443	0.594092		0.0871782	0.758393		0.279395	0.774524		0.0697106	0.741176
0.373804	0.636249		0.283842	0.723302		0.383471	0.747193		0.164461	0.666266		0.0133631	0.719316		0.0775121	0.702885		0.521924	0.530236		0.340882	0.645258		0.0762749	0.64814		0.225357	0.780862		0.372323	0.552367		0.271345	0.682569		0.190953	0.767295		0.861323	0.561314		0.027826	0.787125		0.274269	0.775204		0.169367	0.659845
0.498742	0.615765		0.276953	0.704935		0.344938	0.739529		0.162605	0.681836		0.249441	0.531953		0.010458	0.717566		0.514024	0.526882		0.668981	0.603218		0.090768	0.654095		0.192742	0.78441		0.483933	0.568848		0.39415	0.620394		0.395483	0.801773		0.866699	0.57517		0.0826974	0.797838		0.227345	0.770416		0.156486	0.701085
0.570539	0.583383		0.593101	0.65033		0.153358	0.693608		0.156479	0.670952		0.316894	0.59957		0.015501	0.729668		0.496676	0.526311		0.505686	0.582998		0.100337	0.611115		0.136588	0.804399		0.441832	0.525309		0.275111	0.630382		0.0944773	0.790212		0.473181	0.535423		0.0964601	0.795223		0.234529	0.765882		0.0993011	0.693926
0.965309	0.450102		0.914378	0.670845		0.0666777	0.766875		0.181401	0.659186		0.238057	0.59337		0.124761	0.681575		0.461188	0.543643		0.14988	0.648353		0.130314	0.597308		0.093752	0.743753		0.376628	0.528221		0.343032	0.627988		0.0258325	0.781531		0.814673	0.58758		0.0733516	0.757487		0.236845	0.777309		0.117414	0.660105
0.866449	0.532882		0.816787	0.656802		0.00651817	0.731101		0.153218	0.691482		0.310297	0.53003		0.0468825	0.779227		0.492834	0.526661		0.135382	0.614422		0.120998	0.607696		0.0663085	0.768382		0.323896	0.577154		0.464786	0.566905		0.0476643	0.753083		0.649093	0.586308		0.0398292	0.78566		0.245938	0.753413		0.17692	0.719557
0.417636	0.645706		0.48912	0.640682		0.152185	0.674511		0.175758	0.67045		0.102498	0.628177		0.100721	0.687107		0.648603	0.538552		0.260831	0.649084		0.0963769	0.649673		0.0721437	0.772473		0.3486	0.557545		0.702938	0.497319		0.2021	0.773103		0.550637	0.539425		0.00602881	0.672882		0.246939	0.765261		0.156805	0.675157
0.2732	0.666338		0.308141	0.722146		0.0968635	0.7125		0.137276	0.67925		0.220306	0.499477		0.161912	0.625035		0.75424	0.535037		0.429693	0.641875		0.134335	0.651669		0.0753262	0.740547		0.258446	0.589934		0.356259	0.561373		0.09321	0.743534		0.469216	0.55231		0.133625	0.62927		0.227148	0.760767		0.114333	0.714115
0.25718	0.671483		0.267913	0.722021		0.317366	0.725514		0.132959	0.674752		0.606192	0.533287		0.308304	0.608262		0.69099	0.533558		0.190097	0.652131		0.136331	0.662738		0.0855068	0.751085		0.318205	0.547673		0.48906	0.547736		0.013128	0.747629		0.508083	0.565279		0.00517685	0.681183		0.20625	0.753164		0.17113	0.68083
0.240166	0.706394		0.283984	0.732584		0.379478	0.733938		0.13132	0.667181		0.319447	0.449918		0.22493	0.647363		0.561695	0.531484		0.488286	0.613509		0.0968769	0.661273		0.0935236	0.778575		0.493315	0.559867		0.544133	0.523845		0.000512216	0.772747		0.416165	0.609143		0.00801557	0.775439		0.196895	0.762485		0.144143	0.70669
0.276209	0.716314		0.395183	0.687047		0.0849461	0.752878		0.127321	0.693196		0.00926653	0.598437		0.0577224	0.768427		0.531317	0.508523		0.59039	0.641803		0.121948	0.647119		0.0868589	0.739079		0.747125	0.539823		0.37929	0.528571		0.00859958	0.748155		0.317953	0.579832		0.0218228	0.770221		0.206333	0.742731		0.219315	0.644032
0.625583	0.616065		0.290381	0.716411		0.116686	0.690714		0.142921	0.678893		0.00681175	0.682922		0.00648561	0.710397		0.570845	0.529287		0.219511	0.647967		0.124479	0.646757		0.116637	0.742772		0.78004	0.544538		0.480698	0.510034		0.101508	0.78759		0.354818	0.601992		0.00718493	0.790175		0.219721	0.755705		0.181601	0.699126
0.453184	0.649295		0.525497	0.674234		0.183427	0.64605		0.150206	0.689772		0.053347	0.699586		0.0577572	0.677264		0.593701	0.513286		0.0968116	0.652191		0.119797	0.636812		0.00651293	0.772191		0.726112	0.518151		0.639751	0.519474		0.444066	0.76562		0.290165	0.601566		0.00266709	0.734719		0.26746	0.736533		0.177239	0.689608
0.281972	0.695676		0.49318	0.640104		0.125587	0.67457		0.112307	0.664018		0.0269639	0.724676		0.112368	0.687911		0.589146	0.496086		0.238792	0.645766		0.139525	0.637563		0.00273509	0.736624		0.733112	0.529277		0.318512	0.578077		0.385191	0.712152		0.296692	0.611364		0.0167885	0.741634		0.259477	0.744087		0.167772	0.67435
0.218937	0.756229		0.161865	0.817447		0.146367	0.854876		0.35954	0.750565		0.156697	0.67907		0.0381987	0.786449		0.244703	0.551596		0.307712	0.729687		0.124488	0.644293		0.0748317	0.788975		0.0242411	0.803876		0.078371	0.759706		0.0971773	0.853301		0.0794334	0.756363		0.00991491	0.838079		0.399777	0.799872		0.0450559	0.829902
0.0998773	0.641808		0.167626	0.851233		0.0156552	0.876512		0.416485	0.762192		0.0553265	0.772919		0.0937474	0.795546		0.196689	0.558327		0.198651	0.679512		0.111062	0.76735		0.0288651	0.831103		0.0215269	0.731726		0.554438	0.755705		0.097464	0.845275		0.0769243	0.725373		0.00808252	0.903194		0.666716	0.798396		0.0289788	0.871342
0.00410348	0.780885		0.0613126	0.81296		0.196143	0.787114		0.348711	0.699972		0.145332	0.681962		0.0739897	0.805507		0.140557	0.642304		0.0708014	0.723713		0.0713547	0.757926		0.0474033	0.860835		0.0325203	0.816394		0.119948	0.791705		0.0529346	0.830478		0.196611	0.693596		0.000789121	0.896337		0.645917	0.827147		0.0118981	0.829559
0.0353944	0.698842		0.0634748	0.839506		0.0228723	0.876137		0.367695	0.713419		0.177177	0.657913		0.0340075	0.739523		0.142869	0.61348		0.0691615	0.755445		0.0168698	0.721216		0.0169885	0.841367		0.0195046	0.74544		0.525771	0.783336		0.0770854	0.841944		0.0982977	0.70337		0.010349	0.895203		0.569099	0.804286		0.0912151	0.744578
0.0140689	0.786031		0.0302987	0.811275		0.0661619	0.833603		0.228723	0.824398		0.202495	0.652274		0.0687648	0.788635		0.171583	0.592332		0.0420433	0.751478		0.0145933	0.771255		0.00747261	0.861017		0.0790124	0.770463		0.252018	0.805029		0.059651	0.875676		0.0139993	0.715207		0.0177447	0.932517		0.210986	0.811507		0.248031	0.739514
0			0			0			0			0			0			0			0			0			0			0			0			0			0			0			0			0
0.0651201	0.780237		0.145433	0.79451		0.175397	0.827731		0.0799308	0.856246		0.137452	0.643609		0.069956	0.789192		0.165678	0.665502		0.123605	0.688149		0.0259576	0.660544		0.0177926	0.87273		0.139243	0.751113		0.0174898	0.7656		0.149707	0.829995		0.0350216	0.675019		0.00229964	0.920707		0.0468591	0.844931		0.00807067	0.840947
0.0103564	0.741282		0.162854	0.848916		0.00390873	0.882778		0.0924509	0.827451		0.282169	0.68864		0.0560089	0.805473		0.386339	0.573303		0.555389	0.681458		0.0381037	0.723702		0.0092051	0.876746		0.236405	0.720247		0.0249807	0.76525		0.273743	0.840782		0.0417462	0.77649		0.00325541	0.92409		0.0651285	0.811184		0.00173063	0.865397
0.0647913	0.77097		0.0280173	0.804689		0.275281	0.67431		0.103908	0.824592		0.280345	0.689653		0.0156608	0.764896		0.34648	0.538166		0.105579	0.681449		0.0955124	0.625603		0.011339	0.84942		0.00771348	0.79219		0.0955497	0.698914		0.230992	0.852832		0.0784996	0.659432		0.0303891	0.910452		0.00055082	0.837085		0.0949283	0.763185
0.00957787	0.799288		0.0542396	0.796418		0.098387	0.893636		0.11519	0.808402		0.11814	0.78999		0.0358058	0.792729		0.204211	0.562863		0.0692984	0.72042		0.0299265	0.699163		0.0209629	0.872238		0.0452654	0.76218		0.101515	0.779641		0.102146	0.834035		0.0982081	0.706224		0.0101015	0.920054		0.0666913	0.769737		0.174302	0.753176
0.0809718	0.72072		0.0536805	0.863205		0.137138	0.843893		0.0408602	0.855406		0.168066	0.667214		0.0123498	0.795254		0.241504	0.575523		0.0446772	0.773731		0.0515215	0.74356		0.010857	0.863992		0.174159	0.695092		0.0646098	0.686501		0.105185	0.849997		0.0489198	0.762747		0.00128791	0.8972		0.0139416	0.796256		0.285413	0.736199
0.0785956	0.71709		0.259438	0.779123		0.324163	0.70375		0.11115	0.805647		0.00677206	0.626114		0.00873078	0.784145		0.107663	0.602624		0.0192302	0.668157		0.0928752	0.721306		0.00532412	0.81808		0.182737	0.670447		0.137165	0.689457		0.0924037	0.865541		0.00753927	0.761497		0.0167372	0.911258		0.0753722	0.754087		0.310311	0.757091
0.0319984	0.755305		0.1029	0.824516		0.0723533	0.792982		0.0924182	0.795915		0.0738167	0.676532		0.041202	0.790851		0.0780914	0.695628		0.024352	0.754656		0.0781704	0.683983		0.0275089	0.834338		0.0968469	0.801168		0.0628952	0.651333		0.16689	0.813099		0.0250249	0.732009		0.00300822	0.915102		0.0545158	0.772741		0.226885	0.773784
0.0349208	0.806239		0.195614	0.811126		0.03752	0.8926		0.0445827	0.802119		0.0598595	0.704029		0.0178538	0.787377		0.178068	0.569024		0.0292186	0.689203		0.138079	0.609854		0.0339291	0.865809		0.0303831	0.776089		0.326777	0.593928		0.0588312	0.880626		0.00390808	0.742538		0.011441	0.906537		0.634079	0.793693		0.31233	0.74176
0.0281075	0.723235		0.0181225	0.823717		0.00878791	0.897345		0.0569184	0.791637		0.14147	0.643474		0.00587507	0.790205		0.00283379	0.777722		0.0813338	0.729745		0.00131822	0.677529		0.0106946	0.853519		0.0867937	0.756332		0.0709965	0.70061		0.0792092	0.867114		0.02088	0.759593		0.00661489	0.896408		0.525072	0.822809		0.164518	0.755183
0.0753481	0.745329		0.087491	0.820678		0.069322	0.83285		0.0661914	0.810147		0.283259	0.613987		0.00115439	0.781702		0.0969682	0.670634		0.0378847	0.737462		0.0638214	0.704219		0.0470204	0.857584		0.144898	0.745736		0.198262	0.598333		0.026914	0.89029		0.0212276	0.73159		0.00869233	0.902938		0.476187	0.836053		0.192945	0.774914
0.00711305	0.670007		0.126807	0.796194		0.214338	0.845316		0.0930109	0.804127		0.20795	0.599288		0.0413805	0.813184		0.0852717	0.656688		0.057257	0.700869		0.0542113	0.723269		0.0424787	0.85923		0.0228339	0.783107		0.141803	0.613113		0.0220411	0.858084		0.117954	0.682964		0.0228476	0.909452		0.0785317	0.799701		0.223656	0.756434
0.014825	0.687933		0.346035	0.806447		0.385439	0.699483		0.0856633	0.809571		0.191696	0.716358		0.0271593	0.763073		0.343004	0.519173		0.290912	0.66317		0.0500965	0.665771		0.0234212	0.851275		0.0417268	0.747458		0.422412	0.759538		0.00141459	0.793146		0.0493762	0.733741		0.00702486	0.901011		0.101334	0.809507		0.101474	0.79607
0.0369865	0.722815		0.129674	0.824442		0.209088	0.650793		0.199603	0.751654		0.200056	0.625552		0.032953	0.716421		0.230367	0.550618		0.09291	0.71735		0.0791368	0.722412		0.0215325	0.837373		0.0199839	0.734582		0.0176705	0.763633		0.299246	0.867561		0.0127338	0.711529		0.0194332	0.903066		0.0106224	0.829044		0.0889631	0.810842
0.0278914	0.802612		0.258039	0.777029		0.0888654	0.887084		0.0156667	0.807143		0.300329	0.638735		0.0164335	0.74329		0.0979817	0.598356		0.156431	0.706905		0.0761378	0.699889		0.0105298	0.84698		0.203154	0.629429		0.00731338	0.742287		0.0447328	0.844038		0.134349	0.703947		0.0381662	0.886956		0.251813	0.752418		0.114363	0.790829
0.0808981	0.744535		0.332835	0.73313		0.166115	0.799915		0.00393576	0.777612		0.303936	0.62215		0.0107517	0.75026		0.164944	0.569211		0.207663	0.693133		0.0911552	0.68328		0.0308236	0.866977		0.0527799	0.74527		0.0872772	0.657328		0.135683	0.838047			0.724165		0.0210938	0.892825		0.0684004	0.774697		0.0923805	0.817537
0.0780933	0.714443		0.176463	0.702968		0.162415	0.780417		0.0851417	0.80265		0.245266	0.646371		0.0571281	0.752867		0.0577688	0.69812		0.373396	0.66581		0.0144513	0.675143		0.00654989	0.836462		0.0117332	0.718622		0.180938	0.616606		0.154091	0.850427		0.0500302	0.710536		0.00981982	0.893529		0.0867613	0.815975		0.0770024	0.813789
0.149591	0.757069		0.0469754	0.784403		0.038377	0.849838		0.0649012	0.82806		0.301838	0.641062		0.0465423	0.784746		0.0726798	0.703954		0.136055	0.755122		0.0589901	0.660434		0.0279526	0.751001		0.0378125	0.732117		0.374582	0.596562		0.0806449	0.881073		0.132163	0.705236		0.0272563	0.894944		0.123875	0.80652		0.0732387	0.773063
0.139606	0.705356		0.0443078	0.816909		0.131349	0.850866		0.0192592	0.846997		0.0891665	0.709757		0.0721985	0.76195		0.242301	0.535186		0.0190908	0.645733		0.0478793	0.639141		0.0762545	0.765233		0.177412	0.668776		0.104801	0.68254		0.137511	0.864983			0.71059		0.00943805	0.893731		0.213414	0.793538		0.0892441	0.810131
0.0591808	0.684259		0.0757326	0.793463		0.38452	0.630455		0.0794503	0.81817		0.103522	0.697146		0.025378	0.741583		0.0951992	0.610225		0.0103508	0.719771		0.11103	0.72096		0.0850663	0.789634		0.00487776	0.706475		0.519928	0.795118		0.0276432	0.850842		0.0138772	0.705682		0.0243828	0.899857		0.0867726	0.764089		0.11274	0.744411
0.0449733	0.721533		0.100906	0.802173		0.397996	0.610461		0.115794	0.826384		0.0983517	0.696238		0.0043056	0.755683		0.102679	0.747222		0.0823436	0.663539		0.114958	0.685564		0.0659124	0.798014		0.0841548	0.72099		0.0267514	0.758435		0.147832	0.845049		0.180442	0.622117		0.0410411	0.888751		0.121942	0.750952		0.0623684	0.799687
0.110892	0.71676		0.476415	0.76296		0.400272	0.618659		0.104516	0.816806		0.118508	0.834602		0.0015445	0.710661		0.291043	0.494292		0.0373922	0.688979		0.123162	0.737111		0.0899014	0.784522		0.0621186	0.720423		0.00387179	0.702746		0.14193	0.836877		0.176281	0.749631		0.011364	0.894639		0.133691	0.758975		0.109808	0.804281
0.917981	0.538119		0.945536	0.755847		0.380998	0.680494		0.0724773	0.811155		0.192371	0.575163		0.0248388	0.750205		0.132467	0.594028		0.469666	0.700535		0.066978	0.654661		0.051567	0.754542		0.00400421	0.735038		0.00408951	0.719608		0.104841	0.857674		0.350097	0.671004		0.0131218	0.870181		0.184501	0.772241		0.142019	0.78328
0.858663	0.564997		0.854356	0.784716		0.371795	0.653472		0.0930352	0.776635		0.026755	0.751141		0.0786865	0.770231		0.00376079	0.759561		0.0674208	0.684058		0.067203	0.690217		0.0269845	0.794019		0.23298	0.63445		0.073546	0.657942		0.177597	0.8051		0.120878	0.747346		0.0270986	0.882333		0.0961085	0.767566		0.166959	0.726372
0.544287	0.678165		0.640337	0.75674		0.384395	0.659347		0.0418527	0.754644		0.201269	0.71448		0.0236823	0.769492		0.386176	0.503126		0.0907453	0.691238		0.100866	0.689587		0.0156915	0.829015		0.143587	0.662374		0.0212414	0.687348		0.0549156	0.862128		0.274364	0.75645		0.0317197	0.879756		0.0752745	0.70629		0.11662	0.830393
0.72443	0.646648		0.668673	0.687051		0.210147	0.659851		0.488484	0.696205		0.243035	0.604354		0.208394	0.751604		0.986751	0.596718		0.264146	0.720311		0.0473693	0.578742		0.0922961	0.765603		0.806519	0.604362		0.0106627	0.726118		0.660273	0.723797		1.01992	0.556961		0.0949446	0.753589		0.189816	0.695765		0.0145934	0.754583
0.622599	0.629284		0.980528	0.719177		0.262698	0.74446		0.640743	0.66624		0.222219	0.549034		0.189379	0.767286		0.900219	0.621211		0.828873	0.677265		0.111754	0.657993		0.107897	0.820216		0.777106	0.604072		0.123996	0.688595		0.268199	0.816061		1.04747	0.593243		0.095848	0.762585		0.612023	0.723331		0.00835572	0.787011
0.340046	0.663283		0.903598	0.705907		0.128568	0.780486		0.538898	0.697404		0.0277564	0.692176		0.140453	0.777002		0.812703	0.610544		0.294626	0.69085		0.218951	0.574489		0.115175	0.829171		0.75247	0.583023		0.243777	0.607679		0.196843	0.774857		0.964678	0.554618		0.116177	0.753301		0.524052	0.72402		0.0108207	0.79564
0.343251	0.692628		0.618831	0.704645		0.100914	0.741082		0.332159	0.72549		0.0897259	0.584459		0.126737	0.734856		0.751666	0.575613		0.20091	0.718708		0.144474	0.598345		0.130094	0.825925		0.743694	0.603586		0.106984	0.648296		0.0692973	0.78194		0.938751	0.519175		0.14713	0.730954		0.521239	0.710024		0.00767504	0.770482
0.453639	0.646672		0.268819	0.714752		0.227138	0.670911		0.371726	0.659208		0.016708	0.672137		0.149021	0.703073		0.77588	0.61494		0.376911	0.659569		0.0691231	0.626269		0.139783	0.810727		0.753925	0.589605		0.18619	0.668261		0.0887854	0.765679		0.670402	0.521126		0.138816	0.737158		0.486682	0.738791		0.0162219	0.809166
0.351078	0.676716		0.261677	0.763741		0.247064	0.618303		0.367691	0.71668		0.293302	0.590973		0.0658203	0.672071		0.778663	0.600489		0.568185	0.654291		0.225915	0.638293		0.113946	0.802074		0.57679	0.595358		0.280529	0.604088		0.0164698	0.76721		1.08255	0.588857		0.0871838	0.775579		0.407331	0.728265		0.0127617	0.788181
0.334008	0.665811		0.356031	0.747127		0.272171	0.548966		0.616069	0.66494		0.197321	0.529456		0.159103	0.740991		0.758289	0.602882		0.543083	0.678517		0.193262	0.64566		0.123633	0.809356		0.746461	0.597738		0.0606447	0.656327		0.0610041	0.813537		1.0562	0.57892		0.0568295	0.787834		0.426244	0.720602		0.0125592	0.79942
0.311972	0.708059		0.272977	0.725898		0.242995	0.645833		0.547758	0.70814		0.0827225	0.654307		0.0888763	0.681076		0.764823	0.596205		0.713881	0.680911		0.11412	0.670238		0.141886	0.821834		0.457486	0.584817		0.177983	0.607838		0.225695	0.81948		0.632595	0.521925		0.0797611	0.77406		0.419217	0.748175		0.0773175	0.747682
0.585415	0.606898		0.294929	0.70944		0.169686	0.581892		0.476504	0.703706		0.0152255	0.617851		0.0559021	0.696294		0.762844	0.574371		0.277469	0.715183		0.0792714	0.681591		0.146194	0.82423		0.728092	0.560883		0.446393	0.562202		0.227047	0.771506		0.732829	0.528344		0.120016	0.789452		0.320165	0.694		0.0595949	0.737264
0.549459	0.625248		0.25198	0.714459		0.26539	0.777273		0.458642	0.704657		0.217832	0.569224		0.0334337	0.693648		0.77464	0.600758		0.259143	0.690443		0.0297386	0.690155		0.122649	0.801142		0.422527	0.596182		0.0795789	0.58867		0.00437659	0.779219		0.455985	0.550523		0.114372	0.775825		0.431217	0.754632		0.00110969	0.752419
0.357307	0.63923		0.254968	0.763354		0.0785694	0.7776		0.457775	0.713685		0.171376	0.540125		0.0684672	0.650702		0.767003	0.589043		0.461187	0.665628		0.0010317	0.686855		0.12614	0.821298		0.543307	0.58558		0.142383	0.621872		0.0523045	0.805967		0.381358	0.586705		0.0910439	0.735263		0.459476	0.743927		0.0358508	0.742383
0.297071	0.657022		0.537873	0.728568		0.253584	0.637049		0.459195	0.659882		0.160145	0.741993		0.0524474	0.711877		0.686645	0.58861		0.638564	0.679681		0.0750154	0.722818		0.107531	0.800182		0.556354	0.531614		0.175967	0.582257		0.0175759	0.775026		0.351305	0.592403		0.112125	0.808137		0.484221	0.741947		0.12636	0.755716
0.351006	0.668121		0.708885	0.696255		0.174416	0.658228		0.453193	0.681058		0.193339	0.651892		0.0572257	0.672651		0.699699	0.580326		0.207595	0.684347		0.0658712	0.680659		0.111015	0.808476		0.504756	0.548243		0.403544	0.548608		0.0618068	0.774417		0.639669	0.613814		0.134321	0.800417		0.489426	0.730012		0.114354	0.769388
0.353424	0.678675		0.300331	0.686928		0.186788	0.651781		0.432425	0.693182		0.213419	0.613631		0.023492	0.647757		0.704605	0.592967		0.17339	0.734796		0.0868335	0.672103		0.0850164	0.822041		0.480516	0.592756		0.3836	0.584974		0.0346385	0.768087		0.829097	0.614996		0.127147	0.801182		0.479619	0.75152		0.0529168	0.760654
0.384336	0.708766		0.209848	0.734852		0.218523	0.63837		0.438216	0.703282		0.000271987	0.578043		0.0448967	0.716327		0.720579	0.582808		0.544478	0.677598		0.102309	0.650407		0.0881829	0.828989		0.67069	0.525684		0.0675203	0.613666		0.0474866	0.748284		0.611309	0.564935		0.132804	0.789838		0.528426	0.712419		0.0352649	0.736428
0.400542	0.613059		0.227657	0.750472		0.227881	0.591123		0.418541	0.653554		0.0501979	0.668594		0.0436115	0.770236		0.716112	0.591631		0.639175	0.700804		0.0769427	0.642194		0.0920743	0.821654		0.638463	0.553211		0.266529	0.656687		0.112291	0.790734		0.696814	0.503126		0.138031	0.788143		0.53371	0.717699		0.0360367	0.698476
0.342805	0.644695		0.269347	0.751981		0.247983	0.598578		0.443181	0.64905		0.209445	0.561241		0.0728295	0.755794		0.747891	0.598596		0.172716	0.722679		0.0988537	0.636096		0.202624	0.767434		0.405331	0.546151		0.160223	0.75189		0.0650105	0.754578		0.807444	0.567017		0.104923	0.749315		0.490381	0.742484		0.178321	0.671756
0.387872	0.672053		0.253543	0.713544		0.317309	0.761486		0.393184	0.639572		0.189132	0.579764		0.00874729	0.738122		0.693507	0.575031		0.382925	0.676552		0.0616816	0.657212		0.217885	0.818181		0.29331	0.596566		0.0193269	0.714882		0.131302	0.775097		0.847324	0.495345		0.0455707	0.779837		0.485255	0.733318		0.0786647	0.757911
0.512811	0.596811		0.246654	0.760193		0.278776	0.773352		0.391328	0.633323		0.0469459	0.565126		0.0792227	0.733194		0.685607	0.578652		0.711025	0.620729		0.0761747	0.670612		0.185269	0.80433		0.40492	0.583132		0.142132	0.658765		0.335832	0.802642		0.8527	0.518844		0.100442	0.792661		0.438331	0.738213		0.091545	0.705683
0.584608	0.579361		0.562802	0.716355		0.0871966	0.740482		0.385203	0.635366		0.114399	0.683521		0.0842658	0.703845		0.668259	0.586169		0.547729	0.599011		0.0857438	0.636171		0.129116	0.795869		0.36282	0.571064		0.0230937	0.715723		0.0348263	0.799307		0.459182	0.508077		0.114205	0.787843		0.445515	0.73653		0.14873	0.676257
0.979378	0.451101		0.88408	0.7029		0.000515753	0.789788		0.410124	0.634703		0.0355618	0.594057		0.0559965	0.701695		0.632772	0.559375		0.191923	0.650554		0.115721	0.594166		0.0862794	0.787339		0.297616	0.565644		0.091014	0.663022		0.0338185	0.782922		0.800674	0.55118		0.0910963	0.754154		0.447831	0.742009		0.130617	0.723614
0.880518	0.495072		0.786489	0.678885		0.0596438	0.746835		0.381941	0.66425		0.107802	0.649918		0.115647	0.703718		0.664417	0.567115		0.177426	0.640391		0.106404	0.616367		0.0588359	0.776292		0.244884	0.628404		0.212768	0.594863		0.0119867	0.767952		0.635094	0.539487		0.0575739	0.784368		0.456924	0.718568		0.0711113	0.751404
0.431704	0.63788		0.458821	0.663357		0.218347	0.687882		0.404481	0.651806		0.0999974	0.50257		0.0319559	0.673374		0.820187	0.571593		0.302875	0.676185		0.0817836	0.651578		0.0646711	0.78091		0.269588	0.565465		0.450921	0.584782		0.142449	0.781981		0.536638	0.537282		0.0117159	0.652118		0.457924	0.722938		0.0912259	0.736872
0.287268	0.687212		0.277842	0.748649		0.163025	0.696636		0.365999	0.644943		0.0178115	0.473337		0.0931468	0.611525		0.925823	0.580521		0.471737	0.647719		0.119742	0.640663		0.0678536	0.789644		0.179433	0.604128		0.104241	0.59521		0.033559	0.741689		0.455216	0.511809		0.11588	0.636252		0.438133	0.707031		0.133698	0.707282
0.271249	0.683122		0.237614	0.72838		0.251205	0.723924		0.361682	0.633361		0.403697	0.694396		0.23954	0.631317		0.862573	0.579037		0.23214	0.65668		0.121737	0.681093		0.0780342	0.806999		0.239192	0.567115		0.237042	0.596429		0.046523	0.785019		0.494084	0.568163		0.0125679	0.679643		0.417235	0.699528		0.0769013	0.755484
0.254235	0.709632		0.253685	0.712377		0.313316	0.787006		0.360043	0.632064		0.116952	0.516543		0.156165	0.690762		0.733279	0.586206		0.530329	0.617829		0.0822836	0.671751		0.086051	0.803978		0.414302	0.554699		0.292116	0.555592		0.0601632	0.776999		0.402166	0.602172		0.0257603	0.770068		0.40788	0.70557		0.103889	0.709595
0.290278	0.685369		0.364884	0.718824		0.0187842	0.773038		0.356044	0.654286		0.193228	0.463195		0.126487	0.735801		0.7029	0.582439		0.632434	0.661954		0.107355	0.673962		0.0793863	0.793117		0.668112	0.536085		0.127272	0.599062		0.0510514	0.78065		0.303954	0.589946		0.0395675	0.75362		0.417319	0.696484		0.0287163	0.728292
0.639651	0.594338		0.260082	0.703647		0.182848	0.697644		0.371644	0.654226		0.209307	0.572465		0.0622792	0.710826		0.742429	0.55728		0.261555	0.630715		0.109886	0.664743		0.109164	0.75053		0.701028	0.560339		0.22868	0.596934		0.0418571	0.787955		0.340818	0.578743		0.0105598	0.78068		0.430707	0.705923		0.0664307	0.753219
0.467253	0.64806		0.495199	0.732407		0.249589	0.627283		0.37893	0.665435		0.149148	0.561184		0.0110076	0.679199		0.765284	0.56926		0.138855	0.680132		0.105204	0.652209		0.0139855	0.778766		0.6471	0.541761		0.387733	0.559284		0.384415	0.77334		0.276165	0.61808		0.0204118	0.722378		0.478446	0.685039		0.0707926	0.751568
0.296041	0.717838		0.462881	0.693546		0.191749	0.668774		0.34103	0.640921		0.175531	0.564568		0.0436029	0.662793		0.76073	0.556594		0.280835	0.668154		0.124932	0.665269		0.00473752	0.736606		0.654099	0.548861		0.0664942	0.617787		0.32554	0.738454		0.282692	0.57589		0.000956156	0.741408		0.470462	0.718726		0.0802589	0.746485
0.153817	0.750506		0.0164325	0.841323		0.321764	0.810533		0.439471	0.746544		0.0192453	0.727336		0.0317573	0.808334		0.0790247	0.625563		0.184107	0.708697		0.150446	0.580815		0.0570391	0.812098		0.163484	0.747713		0.0608812	0.738451		0.246884	0.818967		0.0444118	0.695573		0.0122146	0.838842		0.446636	0.797442		0.0369852	0.802676
0.0347572	0.758723		0.0221934	0.815792		0.191052	0.822607		0.496415	0.772207		0.192778	0.68504		0.0237913	0.791865		0.0310106	0.621282		0.075046	0.672773		0.137019	0.694492		0.0110725	0.827396		0.117716	0.75858		0.536948	0.718229		0.247171	0.802227		0.0419027	0.692444		0.0103822	0.897154		0.713575	0.781128		0.0370495	0.8355
0.0692236	0.745486		0.0841201	0.805514		0.0207459	0.836527		0.428641	0.689233		0.00788078	0.681169		0.00403362	0.837296		0.0251208	0.670332		0.052804	0.695579		0.0973123	0.647715		0.0296107	0.868678		0.171763	0.73142		0.102458	0.759933		0.202642	0.74489		0.161589	0.688733		0.00308877	0.900619		0.692776	0.795571		0.0199687	0.827181
0.100514	0.728769		0.0819579	0.828436		0.152525	0.850315		0.447626	0.696522		0.0397257	0.757134		0.103964	0.76801		0.0228095	0.529868		0.054444	0.710208		0.0428274	0.687869		0.000804172	0.868273		0.119738	0.733128		0.508282	0.74359		0.226792	0.796557		0.0632761	0.717004		0.0126486	0.899683		0.615959	0.77848		0.0831444	0.750382
0.0510512	0.709309		0.175731	0.796423		0.109235	0.811444		0.308654	0.782917		0.0650433	0.787057		0.00119127	0.847976		0.005905	0.713418		0.0815622	0.704956		0.0113643	0.701		0.0252652	0.896655		0.0602305	0.701033		0.234528	0.74536		0.209358	0.83013		0.0490209	0.740158		0.0200443	0.934243		0.257845	0.781076		0.239961	0.713727
0.0651201	0.780237		0.145433	0.79451		0.175397	0.827731		0.0799308	0.856246		0.137452	0.643609		0.069956	0.789192		0.165678	0.665502		0.123605	0.688149		0.0259576	0.660544		0.0177926	0.87273		0.139243	0.751113		0.0174898	0.7656		0.149707	0.829995		0.0350216	0.675019		0.00229964	0.920707		0.0468591	0.844931		0.00807067	0.840947
0			0			0			0			0			0			0			0			0			0			0			0			0			0			0			0			0
0.0754765	0.769045		0.0174216	0.832585		0.171488	0.827272		0.0125201	0.848172		0.144717	0.692533		0.0139472	0.823136		0.22066	0.649724		0.431784	0.704366		0.012146	0.654117		0.00858754	0.878415		0.0971622	0.72405		0.0424705	0.761475		0.124036	0.836547		0.0067246	0.714523		0.00555506	0.924942		0.111988	0.816813		0.00634004	0.854127
0.129911	0.714593		0.117415	0.857318		0.099884	0.715814		0.0239772	0.846904		0.142894	0.657048		0.0542953	0.766684		0.180802	0.643611		0.0180262	0.693417		0.0695548	0.644145		0.00645359	0.893781		0.131529	0.721644		0.113039	0.703967		0.081285	0.814032		0.0434781	0.695473		0.0326887	0.911584		0.04741	0.827325		0.0868576	0.791346
0.074698	0.814877		0.199672	0.808372		0.273784	0.847233		0.0352595	0.849161		0.255591	0.663472		0.0341503	0.798893		0.0385323	0.584602		0.0543071	0.727928		0.00396893	0.71599		0.00317025	0.874029		0.0939774	0.712244		0.0840251	0.745046		0.251853	0.812611		0.0631865	0.722834		0.00780182	0.934977		0.0198322	0.798364		0.166231	0.727061
0.146092	0.778108		0.0917522	0.882605		0.0382592	0.850402		0.0390706	0.874037		0.0306145	0.756273		0.0576062	0.797706		0.0758254	0.608049		0.0789283	0.745864		0.0255639	0.688756		0.00693559	0.908667		0.0349158	0.733327		0.0820996	0.675611		0.254892	0.824415		0.0839414	0.707201		0.00358756	0.90388		0.0329175	0.802888		0.277342	0.753026
0.143716	0.745349		0.114005	0.814699		0.148766	0.708858		0.0312195	0.818602		0.144224	0.688053		0.0786868	0.831399		0.0580156	0.602359		0.142836	0.666427		0.0669175	0.655669		0.0231168	0.865977		0.043494	0.695454		0.154655	0.714784		0.242111	0.812417		0.0274823	0.679311		0.0144375	0.917869		0.028513	0.7876		0.30224	0.754805
0.0331217	0.768261		0.0425331	0.824805		0.103044	0.753014		0.0124874	0.813214		0.0636349	0.665697		0.0287541	0.825184		0.0875868	0.693942		0.147957	0.738692		0.0522128	0.638438		0.0453015	0.886024		0.23609	0.695451		0.0803849	0.707858		0.316597	0.737032		0.00999667	0.773465		0.000708578	0.917408		0.00765663	0.810197		0.218814	0.746884
0.100041	0.784742		0.0501816	0.823935		0.212917	0.827889		0.124513	0.794273		0.197311	0.727356		0.0521022	0.795687		0.0123895	0.568499		0.0943868	0.721458		0.112121	0.623698		0.0517218	0.871492		0.10886	0.718634		0.344266	0.649425		0.208538	0.842918		0.0311135	0.737161		0.0137407	0.913945		0.680938	0.788149		0.304259	0.759009
0.0932276	0.729205		0.12731	0.820476		0.166609	0.833391		0.0230124	0.769327		0.00401818	0.783043		0.064081	0.790932		0.162844	0.626063		0.0422717	0.701334		0.0246394	0.67155		0.0284872	0.861786		0.0524491	0.722045		0.0884863	0.721247		0.228916	0.811582		0.0141416	0.681553		0.00891453	0.902145		0.571931	0.807187		0.156447	0.787322
0.140468	0.712014		0.0579417	0.789516		0.106075	0.810116		0.0137394	0.787832		0.145807	0.71442		0.0688017	0.783818		0.06871	0.744973		0.0857208	0.734136		0.0378638	0.695238		0.0648131	0.875342		0.00565532	0.792524		0.215751	0.67156		0.176621	0.825857		0.0562492	0.767565		0.010992	0.910575		0.523046	0.809255		0.184874	0.763079
0.058007	0.713822		0.27224	0.805923		0.0389406	0.834792		0.0130801	0.810678		0.0704988	0.569201		0.0285755	0.813921		0.0804065	0.530604		0.0663485	0.706017		0.0282537	0.640301		0.0602713	0.864454		0.162077	0.725555		0.159293	0.658949		0.171748	0.752543		0.0829328	0.715799		0.0251473	0.908061		0.125391	0.778538		0.215586	0.764669
0.0799451	0.736537		0.200602	0.809031		0.210042	0.720152		0.00573248	0.853749		0.0542448	0.771107		0.0427968	0.811762		0.177325	0.662306		0.167307	0.708738		0.0241389	0.665536		0.0412139	0.866351		0.0975161	0.71731		0.404922	0.724898		0.151122	0.731569		0.0143546	0.674121		0.00932451	0.90769		0.148193	0.792067		0.0934031	0.828917
0.102107	0.751144		0.0157583	0.822601		0.0336912	0.677996		0.279534	0.718915		0.0626043	0.661793		0.102909	0.706464		0.0646884	0.568336		0.0306955	0.721886		0.0531792	0.674908		0.0393251	0.839021		0.119259	0.648026		0.000180687	0.768817		0.149539	0.825064		0.0477554	0.732431		0.0217328	0.899906		0.0574815	0.805181		0.0808925	0.817341
0.0930115	0.767283		0.112606	0.751792		0.264263	0.838647		0.0642642	0.78292		0.162877	0.757133		0.0863895	0.718006		0.0676965	0.592911		0.0328256	0.715135		0.0501802	0.680945		0.0283225	0.874858		0.0639115	0.704494		0.0101764	0.766439		0.19444	0.840536		0.0993278	0.65943		0.0404659	0.882504		0.298672	0.773773		0.106292	0.794013
0.146018	0.6796		0.187403	0.765306		0.00928182	0.781075		0.0838666	0.758228		0.166484	0.687308		0.0807077	0.756255		0.000734669	0.565601		0.0840577	0.734013		0.0651976	0.674582		0.013031	0.839355		0.192023	0.703488		0.104767	0.707628		0.28539	0.800523			0.634573		0.0233934	0.88492		0.0215413	0.792072		0.0843098	0.857129
0.143213	0.717513		0.0310301	0.73735		0.012982	0.75755		0.0052109	0.804421		0.107814	0.735292		0.127084	0.718904		0.107909	0.689869		0.249791	0.663741		0.0115063	0.612649		0.0112428	0.862579		0.12751	0.719734		0.198428	0.667414		0.303798	0.781547		0.0850518	0.714358		0.0121195	0.894582		0.0399021	0.806497		0.0689317	0.834434
0.214711	0.722701		0.0984572	0.704115		0.13702	0.810146		0.0150296	0.807783		0.164387	0.7668		0.0234138	0.80814		0.0929984	0.50943		0.0124499	0.717032		0.0330325	0.625285		0.0457453	0.796969		0.177055	0.660702		0.392072	0.651104		0.230352	0.822993		0.0971412	0.792261		0.0295559	0.90821		0.077016	0.795258		0.065168	0.771504
0.204726	0.721606		0.101125	0.804877		0.0440478	0.82917		0.0606716	0.81522		0.0482851	0.685714		0.00224243	0.854428		0.0766225	0.605931		0.142696	0.68551		0.0219217	0.659482		0.0940471	0.813656		0.0381696	0.690664		0.0873108	0.709641		0.0121957	0.783816			0.684083		0.0117377	0.889136		0.260273	0.791194		0.0811735	0.814323
0.124301	0.709453		0.221165	0.837449		0.209123	0.68981		0.000480553	0.826754		0.0339298	0.742891		0.044578	0.782233		0.070479	0.534209		0.133956	0.688398		0.0850725	0.658706		0.102859	0.843155		0.144121	0.646527		0.502439	0.71308		0.122064	0.828976		0.0488988	0.799436		0.0266825	0.890172		0.133632	0.770587		0.10467	0.76989
0.110093	0.745138		0.0445265	0.821674		0.222599	0.674357		0.0358633	0.826631		0.0390999	0.752689		0.0656504	0.761432		0.268357	0.637554		0.0412618	0.705142		0.0890008	0.64859		0.0837051	0.845299		0.0550881	0.686547		0.00926166	0.724213		0.297539	0.789891		0.145421	0.709674		0.0433408	0.89502		0.0750826	0.751619		0.0542977	0.811064
0.176012	0.737684		0.330983	0.819719		0.224875	0.613528		0.0245853	0.823775		0.255959	0.708217		0.0715005	0.702299		0.125365	0.604592		0.160998	0.673482		0.0972049	0.624125		0.107694	0.825855		0.0771242	0.644118		0.0213616	0.736441		0.291637	0.790182		0.211303	0.689596		0.0136636	0.892539		0.0868315	0.76663		0.101738	0.812692
0.852861	0.574675		0.800104	0.782922		0.205601	0.664441		0.00745346	0.81953		0.054919	0.711537		0.0451172	0.787069		0.0332107	0.507635		0.346061	0.687262		0.0410204	0.646064		0.0693596	0.808651		0.143247	0.704962		0.0215793	0.696725		0.254548	0.767895		0.315075	0.780217		0.0154214	0.862913		0.231361	0.733015		0.133948	0.811641
0.793543	0.606782		0.708923	0.791283		0.196398	0.653084		0.0131043	0.794736		0.164207	0.743874		0.00873042	0.807117		0.161917	0.641485		0.0561846	0.656481		0.0412454	0.67825		0.0447772	0.82768		0.0937374	0.703728		0.0910358	0.709653		0.327304	0.718136		0.0858569	0.65944		0.0293982	0.880962		0.0492493	0.764107		0.158888	0.740713
0.479167	0.698007		0.494904	0.752376		0.208998	0.635157		0.121783	0.783606		0.0638177	0.698951		0.0462738	0.722425		0.220498	0.598596		0.0328602	0.705561		0.0749085	0.652387		0.0334841	0.842145		0.28283	0.612614		0.0387312	0.715613		0.204623	0.772439		0.239343	0.70497		0.0340193	0.879458		0.0284154	0.732343		0.108549	0.833588
0.659309	0.635196		0.52324	0.686236		0.385544	0.616613		0.568414	0.692886		0.105584	0.620549		0.138438	0.785366		0.821073	0.573192		0.140541	0.714052		0.0733269	0.543626		0.0745035	0.735524		0.945762	0.590566		0.0281525	0.746713		0.510566	0.713732		0.984894	0.603308		0.0972443	0.771944		0.236675	0.675856		0.00652272	0.732825
0.557479	0.643342		0.835096	0.723688		0.438095	0.717906		0.720673	0.660546		0.0847674	0.604726		0.119423	0.816836		0.734541	0.583462		0.705268	0.644324		0.0857963	0.612797		0.0901042	0.80714		0.916349	0.604119		0.141486	0.721421		0.118492	0.78329		1.01245	0.608547		0.0981476	0.77989		0.658882	0.714279		0.0164264	0.773789
0.274926	0.724433		0.758165	0.719059		0.303965	0.74166		0.618828	0.671816		0.165208	0.589951		0.0704971	0.78329		0.647025	0.570209		0.171021	0.684107		0.192993	0.632042		0.0973822	0.803283		0.891712	0.577614		0.261267	0.663965		0.0471358	0.776647		0.929656	0.570933		0.118477	0.764629		0.570911	0.715879		0.0188914	0.778314
0.278131	0.70536		0.473398	0.723419		0.0744832	0.761458		0.41209	0.690683		0.0477257	0.631548		0.0567814	0.741567		0.585988	0.555792		0.0773047	0.686063		0.118517	0.553014		0.112301	0.831001		0.882937	0.572849		0.124474	0.668421		0.0804097	0.797671		0.90373	0.564851		0.14943	0.740623		0.568098	0.701592		0.0157457	0.779507
0.388519	0.679354		0.123387	0.729353		0.0517413	0.657435		0.451657	0.690524		0.120744	0.635432		0.0790648	0.761869		0.610201	0.583203		0.253305	0.678829		0.0950807	0.598561		0.12199	0.776007		0.893168	0.577585		0.20368	0.684904		0.0609216	0.725563		0.635381	0.525069		0.141115	0.737542		0.533542	0.723805		0.0242926	0.793606
0.285958	0.716037		0.116244	0.737098		0.0716669	0.61611		0.447622	0.689987		0.155851	0.66472		0.00413576	0.708535		0.612985	0.576822		0.44458	0.641286		0.251873	0.576301		0.0961534	0.794102		0.716033	0.589127		0.298019	0.646423		0.133237	0.763006		1.04753	0.614354		0.0894835	0.792661		0.45419	0.716777		0.0208323	0.790106
0.268888	0.704297		0.210598	0.7132		0.0967742	0.555487		0.696	0.659375		0.0598696	0.570554		0.0891467	0.806027		0.592611	0.569259		0.419478	0.736909		0.219219	0.647638		0.10584	0.826492		0.885704	0.591587		0.0781345	0.698359		0.0887028	0.743223		1.02117	0.632425		0.0591292	0.802169		0.473103	0.692999		0.0206299	0.792936
0.246852	0.70186		0.127545	0.717514		0.0675984	0.662486		0.627689	0.688223		0.0547292	0.7461		0.0189203	0.68069		0.599145	0.564707		0.590275	0.648991		0.140077	0.675547		0.124093	0.838767		0.596729	0.590829		0.195473	0.659251		0.0759878	0.751776		0.597573	0.548719		0.0820607	0.791621		0.466076	0.719634		0.0692468	0.739262
0.520295	0.650797		0.149496	0.756618		0.00571102	0.612388		0.556435	0.686778		0.152677	0.584453		0.0140539	0.709774		0.597165	0.581331		0.153863	0.696799		0.105229	0.630706		0.128401	0.832085		0.867335	0.555028		0.463883	0.611672		0.0773398	0.836059		0.697808	0.614968		0.122316	0.795821		0.367024	0.701456		0.0515242	0.709879
0.484339	0.658465		0.106547	0.701216		0.440787	0.755319		0.538573	0.683269		0.08038	0.714635		0.10339	0.68712		0.608961	0.573577		0.135538	0.705646		0.0556962	0.645013		0.104856	0.79475		0.561769	0.574486		0.0970687	0.63762		0.14533	0.738666		0.420963	0.568753		0.116672	0.777287		0.478076	0.729		0.00696098	0.74731
0.292186	0.629967		0.109536	0.752114		0.253967	0.752408		0.537706	0.701299		0.033924	0.523244		0.138423	0.603964		0.601324	0.580197		0.337582	0.741318		0.0269893	0.631806		0.108347	0.790974		0.682549	0.595345		0.159873	0.65806		0.0974025	0.745805		0.346336	0.595506		0.0933436	0.749181		0.506336	0.720689		0.0439215	0.739955
0.231951	0.700554		0.39244	0.71601		0.078187	0.662364		0.539126	0.670014		0.297597	0.558905		0.0175086	0.705072		0.520967	0.559594		0.514959	0.643581		0.100973	0.65361		0.0897388	0.778166		0.695597	0.51963		0.193456	0.65955		0.167283	0.732872		0.316284	0.624633		0.114425	0.818471		0.531081	0.708067		0.13443	0.766161
0.285886	0.714763		0.563453	0.71638		0.000981108	0.630339		0.533124	0.683801		0.0558873	0.683615		0.0127303	0.687306		0.53402	0.585225		0.08399	0.676919		0.0918289	0.64473		0.0932223	0.797582		0.643999	0.559131		0.421034	0.590669		0.0879001	0.755333		0.604647	0.538545		0.13662	0.806461		0.536285	0.715283		0.122425	0.762747
0.288304	0.649782		0.154898	0.723395		0.0113907	0.622632		0.512355	0.69502		0.0759675	0.705962		0.0934481	0.62783		0.538927	0.561181		0.0497844	0.70475		0.112791	0.604867		0.0672237	0.820561		0.619759	0.582905		0.40109	0.619038		0.115068	0.734084		0.794076	0.58097		0.129447	0.80238		0.526478	0.728289		0.0609875	0.757491
0.319216	0.669449		0.0644152	0.707689		0.043126	0.619183		0.518147	0.695363		0.13718	0.520307		0.0250594	0.685589		0.554901	0.545527		0.420873	0.714442		0.128267	0.602542		0.0703903	0.853269		0.809932	0.531951		0.0850101	0.662813		0.197194	0.73065		0.576288	0.560927		0.135103	0.797588		0.575285	0.685294		0.0433355	0.719567
0.335422	0.659156		0.0822241	0.721014		0.0524838	0.578104		0.498472	0.643774		0.187649	0.670401		0.0263445	0.731009		0.550434	0.562494		0.515569	0.670379		0.1029	0.573485		0.0742817	0.794381		0.777706	0.52756		0.249039	0.661285		0.0374156	0.783164		0.661793	0.611851		0.140331	0.794753		0.580569	0.696979		0.0279661	0.728013
0.277685	0.671421		0.123915	0.721454		0.0725862	0.65477		0.523112	0.646077		0.0719932	0.657522		0.00287345	0.740683		0.582213	0.58689		0.049111	0.713064		0.124811	0.545788		0.184831	0.779954		0.544574	0.544016		0.142733	0.746331		0.0846964	0.725029		0.772422	0.577467		0.107222	0.752036		0.53724	0.719854		0.17025	0.667331
0.322752	0.667479		0.10811	0.786755		0.492706	0.709066		0.473115	0.626966		0.0516802	0.716997		0.0787033	0.672764		0.527829	0.570949		0.25932	0.709027		0.0876392	0.574364		0.200092	0.786677		0.432553	0.565824		0.0368167	0.723647		0.018405	0.734142		0.812302	0.549793		0.0478703	0.798126		0.532114	0.711516		0.0705941	0.768403
0.447691	0.615207		0.101221	0.760625		0.454174	0.721171		0.471259	0.634078		0.184398	0.536765		0.00926669	0.713996		0.519929	0.567543		0.587419	0.600553		0.102132	0.582296		0.167477	0.80277		0.544163	0.570355		0.159622	0.656592		0.186125	0.782399		0.817678	0.613044		0.102742	0.808385		0.48519	0.710317		0.0834744	0.698948
0.519488	0.567814		0.41737	0.701243		0.262594	0.748309		0.465133	0.631135		0.251851	0.605326		0.0143098	0.715242		0.502581	0.557111		0.424124	0.585982		0.111701	0.556769		0.111323	0.800896		0.502063	0.540059		0.0405835	0.737712		0.114881	0.749306		0.42416	0.533851		0.116504	0.797335		0.492374	0.712063		0.14066	0.701917
0.914258	0.43744		0.738647	0.704963		0.175913	0.781559		0.490055	0.621675		0.173013	0.651018		0.125953	0.661664		0.467093	0.557229		0.0683181	0.64594		0.141678	0.535038		0.0684867	0.758593		0.436859	0.548393		0.108504	0.685279		0.183525	0.761162		0.765652	0.617009		0.093396	0.736135		0.49469	0.717502		0.122547	0.71954
0.815398	0.536354		0.641056	0.695689		0.115753	0.709332		0.461872	0.642554		0.245254	0.550902		0.0456913	0.779546		0.498739	0.564334		0.0538203	0.65795		0.132362	0.539926		0.0410432	0.783134		0.384127	0.605205		0.230258	0.643315		0.161694	0.693385		0.600072	0.601616		0.0598735	0.774747		0.503783	0.692218		0.0630406	0.738035
0.366584	0.666048		0.313388	0.6815		0.0429498	0.663128		0.484412	0.646786		0.0374542	0.647173		0.101912	0.635713		0.654508	0.565666		0.179269	0.703169		0.107741	0.586258		0.0468785	0.780981		0.408831	0.548148		0.46841	0.628229		0.00725815	0.781051		0.501616	0.528543		0.0140155	0.656225		0.504783	0.694411		0.0831553	0.726587
0.222148	0.678045		0.132409	0.723782		0.0123717	0.703996		0.44593	0.637518		0.155263	0.526336		0.163103	0.600515		0.760145	0.555808		0.348131	0.616681		0.145699	0.575622		0.0500609	0.764817		0.318676	0.620305		0.121731	0.662376		0.116148	0.726376		0.420195	0.538202		0.11358	0.6267		0.484992	0.694615		0.125627	0.721872
0.206129	0.707054		0.0921818	0.725514		0.426602	0.678227		0.441613	0.625511		0.541148	0.573908		0.309496	0.585788		0.696895	0.572008		0.108535	0.637783		0.147695	0.581165		0.0602416	0.768656		0.378435	0.560538		0.254532	0.644186		0.19623	0.721823		0.459062	0.560738		0.0148675	0.685296		0.464094	0.684709		0.0688306	0.754921
0.189115	0.724092		0.108252	0.735343		0.488714	0.723093		0.439974	0.610842		0.254404	0.441614		0.226121	0.622928		0.5676	0.553387		0.406724	0.652207		0.108241	0.593441		0.0682583	0.810955		0.553545	0.550802		0.309606	0.640611		0.20987	0.736814		0.367144	0.598603		0.0280599	0.766381		0.454739	0.696502		0.0958181	0.700487
0.225158	0.650422		0.219452	0.744099		0.194181	0.757538		0.435975	0.638722		0.0557768	0.574177		0.0565311	0.790603		0.537222	0.556629		0.508828	0.624966		0.133312	0.554238		0.0615937	0.774653		0.807355	0.534653		0.144762	0.665008		0.200758	0.712996		0.268932	0.592027		0.0418672	0.76354		0.464178	0.685758		0.0206456	0.741379
0.574531	0.613678		0.114649	0.754235		0.00745049	0.709163		0.451575	0.626644		0.0718551	0.648599		0.00767688	0.705559		0.57675	0.564856		0.137949	0.663628		0.135844	0.57488		0.0913718	0.762799		0.840271	0.524975		0.24617	0.638966		0.10785	0.790077		0.305797	0.614503		0.0128594	0.786876		0.477566	0.691531		0.05836	0.747754
0.402133	0.624806		0.349766	0.734209		0.0741921	0.628929		0.45886	0.650531		0.0116963	0.678278		0.0589484	0.655602		0.599606	0.559089		0.0152494	0.681987		0.131162	0.586518		0.0317782	0.772642		0.786342	0.5561		0.405223	0.614068		0.234708	0.731962		0.241144	0.612134		0.0227114	0.726762		0.525305	0.664696		0.0627219	0.781076
0.230921	0.708537		0.317449	0.679973		0.0163519	0.681169		0.420961	0.61257		0.0380794	0.704145		0.113559	0.648693		0.595051	0.537095		0.157229	0.69117		0.15089	0.557455		0.0225302	0.750771		0.793342	0.542672		0.083984	0.684858		0.175833	0.803818		0.247671	0.613569		0.0032558	0.741767		0.517321	0.710482		0.0721882	0.757168
0.229294	0.69711		0.000989091	0.856216		0.150275	0.860896		0.451991	0.746049		0.125472	0.69563		0.0178101	0.814687		0.141636	0.742371		0.247677	0.800723		0.162592	0.628465		0.0656267	0.764532		0.260646	0.681792		0.103352	0.767303		0.37092	0.795419		0.0376872	0.784218		0.0066595	0.83799		0.334648	0.797651		0.0433253	0.813279
0.110234	0.718192		0.00477187	0.877885		0.0195639	0.873405		0.508935	0.759437		0.337495	0.627732		0.0377385	0.805974		0.18965	0.740845		0.356738	0.737159		0.149165	0.689255		0.01966	0.829842		0.214878	0.681966		0.579419	0.709736		0.371207	0.808362		0.0351781	0.738341		0.00482711	0.882097		0.601587	0.798849		0.0307095	0.895074
0.00625295	0.747081		0.101542	0.875476		0.192234	0.77485		0.441161	0.67186		0.136837	0.726455		0.0179808	0.865705		0.245781	0.661503		0.484588	0.696981		0.109458	0.6404		0.0381982	0.833361		0.268925	0.709578		0.144929	0.723789		0.326677	0.757853		0.154865	0.707806		0.00246629	0.894207		0.580788	0.823651		0.0136287	0.873784
0.025038	0.730443		0.0993794	0.882303		0.0189635	0.876477		0.460146	0.716383		0.104992	0.713865		0.0900164	0.752563		0.24347	0.65847		0.486228	0.745851		0.0549734	0.677137		0.00778337	0.882907		0.2169	0.714272		0.550752	0.748343		0.350828	0.796297		0.0565515	0.724485		0.00709356	0.895932		0.503971	0.791864		0.0894845	0.730236
0.0244253	0.745411		0.193153	0.837831		0.0622532	0.856852		0.321174	0.753518		0.079674	0.695444		0.0127559	0.861283		0.214755	0.683605		0.513346	0.682424		0.0235103	0.749341		0.0166777	0.855244		0.157393	0.716905		0.276998	0.74642		0.333394	0.835759		0.0557455	0.757029		0.0144893	0.927542		0.145857	0.806184		0.246301	0.71582
0.0103564	0.741282		0.162854	0.848916		0.00390873	0.882778		0.0924509	0.827451		0.282169	0.68864		0.0560089	0.805473		0.386339	0.573303		0.555389	0.681458		0.0381037	0.723702		0.0092051	0.876746		0.236405	0.720247		0.0249807	0.76525		0.273743	0.840782		0.0417462	0.77649		0.00325541	0.92409		0.0651285	0.811184		0.00173063	0.865397
0.0754765	0.769045		0.0174216	0.832585		0.171488	0.827272		0.0125201	0.848172		0.144717	0.692533		0.0139472	0.823136		0.22066	0.649724		0.431784	0.704366		0.012146	0.654117		0.00858754	0.878415		0.0971622	0.72405		0.0424705	0.761475		0.124036	0.836547		0.0067246	0.714523		0.00555506	0.924942		0.111988	0.816813		0.00634004	0.854127
0			0			0			0			0			0			0			0			0			0			0			0			0			0			0			0			0
0.0544349	0.702124		0.134837	0.8353		0.271372	0.724441		0.0114571	0.848079		0.00182353	0.734568		0.0403481	0.739422		0.0398586	0.83313		0.44981	0.694858		0.0574088	0.683793		0.00213395	0.887313		0.228692	0.700506		0.0705689	0.700752		0.0427507	0.847175		0.0367535	0.722103		0.0271337	0.918188		0.0645777	0.781073		0.0931977	0.808169
0.00077856	0.814589		0.217094	0.850769		0.102296	0.885596		0.0227395	0.847665		0.400309	0.639068		0.0202031	0.793775		0.182128	0.708166		0.486091	0.712189		0.00817711	0.743267		0.0117578	0.883367		0.19114	0.702192		0.126496	0.811085		0.375889	0.794604		0.0564619	0.730861		0.0133569	0.94435		0.13182	0.777979		0.172571	0.732613
0.0706154	0.772344		0.109174	0.833531		0.133229	0.830469		0.0515906	0.816946		0.114103	0.698697		0.0436591	0.819521		0.144835	0.738793		0.510712	0.726673		0.0134178	0.720871		0.00165195	0.880691		0.0622464	0.651588		0.0396291	0.722842		0.378928	0.83772		0.090666	0.74385		0.0019675	0.908102		0.0790701	0.791065		0.283682	0.7279
0.0682392	0.748303		0.0965837	0.832866		0.320254	0.723142		0.0186994	0.80128		0.288941	0.651368		0.0647397	0.837622		0.278676	0.675773		0.574619	0.652074		0.0547715	0.766523		0.0145292	0.828783		0.0536682	0.656476		0.112184	0.739353		0.366146	0.815854		0.0342069	0.744084		0.0199926	0.924329		0.140501	0.767562		0.308581	0.748192
0.0423549	0.757696		0.0599546	0.85355		0.0684446	0.826622		3.2709e-05	0.823764		0.208352	0.702712		0.0148069	0.793003		0.308247	0.595248		0.579741	0.7427		0.0400668	0.668483		0.036714	0.843789		0.333252	0.691901		0.0379144	0.733736		0.440633	0.743194		0.0167213	0.739704		0.00626363	0.921885		0.119644	0.773862		0.225154	0.750343
0.0245644	0.760822		0.03276	0.838378		0.0414288	0.892562		0.137034	0.786288		0.342028	0.658369		0.0381551	0.814962		0.208271	0.702216		0.52617	0.759385		0.0999751	0.586028		0.0431342	0.862784		0.206022	0.707624		0.301796	0.669873		0.332574	0.849155		0.0378381	0.737541		0.00818562	0.915214		0.56895	0.79372		0.310599	0.740741
0.0177511	0.755699		0.144732	0.863497		0.00487918	0.91774		0.0355324	0.765259		0.140699	0.685371		0.0501338	0.816256		0.383505	0.517524		0.474055	0.745736		0.0367854	0.696842		0.0198997	0.859519		0.149611	0.691339		0.0460158	0.744695		0.352952	0.828665		0.0208662	0.750792		0.00335948	0.920678		0.459943	0.820099		0.162787	0.746749
0.0649917	0.695357		0.0753632	0.885217		0.0654133	0.851448		0.0262595	0.786969		0.00108989	0.687075		0.0548545	0.805352		0.28937	0.606035		0.517504	0.741473		0.0257178	0.736672		0.0562255	0.85595		0.0915069	0.764097		0.173281	0.669696		0.300657	0.804262		0.0629738	0.781787		0.00543692	0.919714		0.411058	0.830823		0.191214	0.761694
0.0174695	0.708996		0.289661	0.792501		0.210429	0.82048		0.000559987	0.784707		0.0742185	0.673905		0.0146284	0.844843		0.301067	0.596096		0.498132	0.76354		0.0161077	0.783228		0.0516838	0.842584		0.259239	0.677934		0.116822	0.646731		0.295784	0.786169		0.0762082	0.699637		0.0195922	0.907805		0.0134032	0.784435		0.221926	0.779584
0.00446857	0.704702		0.183181	0.848222		0.381531	0.708407		0.00678759	0.848085		0.0904725	0.699587		0.0288496	0.768536		0.043335	0.770266		0.264477	0.736188		0.0119929	0.677596		0.0326263	0.867744		0.194678	0.726915		0.447392	0.715784		0.275157	0.73308		0.00762998	0.733815		0.00376945	0.921168		0.0362052	0.76401		0.0997431	0.809083
0.0266301	0.701912		0.0331799	0.876471		0.20518	0.713283		0.292054	0.714813		0.082113	0.650511		0.0889619	0.759822		0.155972	0.746716		0.462479	0.726279		0.0410331	0.716159		0.0307376	0.866535		0.216421	0.652258		0.0426512	0.749531		0.0255033	0.794635		0.05448	0.70404		0.0161778	0.91129		0.0545061	0.824847		0.0872325	0.84028
0.017535	0.725001		0.0951846	0.786868		0.0927741	0.884496		0.0767842	0.768627		0.0181599	0.699665		0.0724424	0.738693		0.288357	0.606053		0.398958	0.750931		0.0380342	0.68991		0.0197349	0.869777		0.0332507	0.7171		0.0322941	0.743519		0.318476	0.856412		0.0926032	0.734668		0.0349108	0.888691		0.186685	0.801058		0.112632	0.832137
0.0705417	0.726186		0.169981	0.768371		0.162207	0.800263		0.0963866	0.76544		0.0217669	0.742443		0.0667605	0.774908		0.221395	0.66434		0.347726	0.697307		0.0530516	0.705967		0.0216186	0.832194		0.289185	0.650384		0.0622965	0.723311		0.409426	0.804881			0.736534		0.0178383	0.895282		0.133529	0.792251		0.0906498	0.85523
0.0677369	0.742224		0.0136086	0.768027		0.158506	0.797319		0.00730916	0.784988		0.0369031	0.679602		0.113137	0.780778		0.32857	0.575917		0.181993	0.758246		0.0236523	0.709456		0.00265521	0.84335		0.224672	0.671515		0.155957	0.67708		0.427833	0.775983		0.0917764	0.729138		0.00656441	0.896057		0.15189	0.788853		0.0752718	0.875513
0.139235	0.724529		0.115879	0.785417		0.0344683	0.858819		0.0275497	0.832376		0.0196692	0.736852		0.0094666	0.786348		0.313659	0.545167		0.419334	0.738718		0.0208864	0.704862		0.0371577	0.749709		0.274218	0.665441		0.349602	0.640796		0.354388	0.828368		0.0904166	0.738385		0.0240009	0.899096		0.189004	0.818269		0.071508	0.823437
0.12925	0.719125		0.118546	0.836619		0.127441	0.84814		0.0731917	0.809352		0.193002	0.703531		0.0161896	0.828512		0.144038	0.70943		0.57448	0.690323		0.00977563	0.684028		0.0854596	0.79262		0.0589926	0.726976		0.129781	0.73259		0.136231	0.774097			0.764813		0.00618264	0.89881		0.148286	0.791492		0.0875135	0.8704
0.0488244	0.728276		0.238587	0.807705		0.380611	0.686383		0.0130006	0.775904		0.178647	0.684148		0.0306308	0.79234		0.291139	0.5761		0.56574	0.687969		0.0729265	0.704664		0.0942714	0.790262		0.241283	0.667701		0.544909	0.735875		0.246099	0.828923		0.0556234	0.730872		0.0211274	0.907294		0.0216441	0.785903		0.11101	0.775962
0.0346169	0.707657		0.061948	0.840696		0.394087	0.654897		0.0233432	0.836071		0.183817	0.715461		0.0517033	0.762145		0.489018	0.497874		0.473045	0.725467		0.0768548	0.651583		0.0751175	0.791149		0.15225	0.697586		0.0517322	0.775708		0.421575	0.764292		0.138696	0.696706		0.0377857	0.884216		0.18707	0.727961		0.0606377	0.83667
0.100535	0.711098		0.313561	0.816991		0.396363	0.623157		0.0120652	0.838302		0.400676	0.656719		0.0575534	0.768303		0.0952956	0.749003		0.592781	0.673579		0.0850588	0.730082		0.0991065	0.783281		0.174286	0.723834		0.0211089	0.744338		0.415673	0.804324		0.218027	0.746781		0.00810858	0.898227		0.198819	0.784452		0.108078	0.87056
0.928338	0.568018		0.782682	0.789771		0.377089	0.666321		0.0199735	0.830057		0.0897984	0.705289		0.0311701	0.77491		0.253871	0.616868		0.0857229	0.791658		0.0288744	0.680588		0.0607721	0.800181		0.240409	0.675896		0.0208912	0.716117		0.378583	0.775792		0.308351	0.677648		0.00986635	0.878713		0.119373	0.783993		0.140288	0.843728
0.86902	0.560385		0.691502	0.801857		0.367886	0.680235		0.000584286	0.793233		0.308924	0.724002		0.0226776	0.790226		0.382578	0.49108		0.487968	0.690344		0.0290993	0.684935		0.0361896	0.836226		0.00342474	0.650038		0.0485653	0.732224		0.45134	0.715578		0.0791323	0.708678		0.0238432	0.888829		0.161237	0.76879		0.165228	0.777375
0.554643	0.674402		0.477483	0.781282		0.380487	0.634142		0.134304	0.778021		0.0808996	0.65236		0.0323266	0.733081		0.000162433	0.732935		0.464644	0.668656		0.0627625	0.675429		0.0248966	0.845989		0.379992	0.574404		0.00373934	0.7076		0.328658	0.763346		0.232618	0.773559		0.0284642	0.881717		0.140403	0.738419		0.114889	0.878615
0.734786	0.615091		0.505818	0.71209		0.214055	0.672373		0.580935	0.709966		0.0391335	0.64172		0.152385	0.776226		0.600413	0.53061		0.291243	0.703033		0.085473	0.613073		0.083091	0.760491		1.04292	0.545155		0.014318	0.778287		0.38653	0.715847		0.978169	0.602402		0.0916892	0.774263		0.124687	0.678261		0.0128628	0.755616
0.632956	0.613215		0.817674	0.735977		0.266607	0.733032		0.733193	0.666957		0.0599499	0.674		0.13337	0.815462		0.51388	0.554526		0.273484	0.746384		0.0736503	0.695419		0.0986918	0.814778		1.01351	0.53678		0.0990156	0.677016		0.00554389	0.788694		1.00572	0.626391		0.0925926	0.781081		0.546895	0.726158		0.0100864	0.824685
0.350403	0.672581		0.740744	0.732945		0.132477	0.751506		0.631349	0.665362		0.309925	0.564909		0.0844443	0.781539		0.426365	0.547073		0.260763	0.733115		0.180847	0.640889		0.10597	0.834096		0.988875	0.530973		0.218796	0.701112		0.0768999	0.78794		0.922931	0.575445		0.112922	0.765008		0.458923	0.741764		0.0125513	0.830854
0.353608	0.6963		0.455976	0.761201		0.0970052	0.699976		0.42461	0.674045		0.192443	0.646058		0.0707285	0.75837		0.365328	0.519513		0.354479	0.725095		0.10637	0.66884		0.120889	0.819045		0.980099	0.530422		0.082003	0.723379		0.204445	0.776901		0.897005	0.533456		0.143875	0.751165		0.45611	0.721405		0.00940567	0.818019
0.463995	0.667443		0.105965	0.775728		0.22323	0.656134		0.464177	0.67521		0.265461	0.616073		0.0930119	0.788575		0.389541	0.52655		0.178478	0.722329		0.107227	0.746923		0.130578	0.78889		0.99033	0.524957		0.16121	0.751595		0.184957	0.710788		0.628656	0.579088		0.13556	0.735366		0.421554	0.758461		0.0179526	0.843549
0.361434	0.668339		0.0988228	0.785508		0.243155	0.598483		0.460142	0.676254		0.0111334	0.691106		0.00981141	0.720818		0.392324	0.518271		0.0127963	0.736371		0.264019	0.657894		0.104741	0.813577		0.813195	0.532962		0.255548	0.641706		0.257273	0.757021		1.0408	0.618578		0.0839284	0.779654		0.342203	0.735063		0.0144923	0.808793
0.344365	0.662093		0.193177	0.754151		0.268263	0.550765		0.70852	0.628648		0.0848477	0.618292		0.103094	0.804323		0.371951	0.512408		0.0123059	0.70493		0.231365	0.694695		0.114428	0.842209		0.982866	0.524871		0.035664	0.742006		0.212739	0.776974		1.01445	0.6109		0.0535741	0.803288		0.361115	0.741834		0.0142899	0.852716
0.322329	0.685046		0.110123	0.78011		0.239087	0.645494		0.640209	0.677263		0.199446	0.623976		0.0328675	0.707452		0.378485	0.495694		0.158492	0.744041		0.152223	0.706744		0.132681	0.819665		0.693891	0.53388		0.153002	0.628783		0.0480479	0.751477		0.590849	0.558936		0.0765057	0.802948		0.354088	0.758501		0.0755869	0.757603
0.595772	0.642656		0.132075	0.763776		0.165777	0.583994		0.568955	0.662973		0.297394	0.588182		0.000106752	0.719378		0.376505	0.510225		0.27792	0.733409		0.117375	0.664861		0.136989	0.815702		0.964497	0.526069		0.421412	0.598528		0.0466959	0.767737		0.691083	0.538009		0.116761	0.797122		0.255037	0.739427		0.0578643	0.741821
0.559816	0.604305		0.0891256	0.77734		0.269298	0.771298		0.551093	0.659429		0.0643373	0.609231		0.0894425	0.737774		0.388301	0.5018		0.296246	0.733226		0.0678423	0.694014		0.113443	0.828141		0.658932	0.509079		0.0545982	0.650049		0.269366	0.761788		0.414238	0.566783		0.111117	0.777152		0.366088	0.773128		0.000620938	0.772369
0.367663	0.612879		0.0921142	0.76759		0.0824781	0.767224		0.550226	0.691858		0.110793	0.615463		0.124476	0.679007		0.380664	0.511854		0.0942016	0.731892		0.0391354	0.69496		0.116935	0.82579		0.779712	0.515663		0.117403	0.660842		0.221438	0.768619		0.339611	0.5732		0.0877885	0.742739		0.394348	0.762787		0.0375814	0.761241
0.307428	0.694089		0.375018	0.746462		0.249675	0.655872		0.551646	0.658774		0.442314	0.563641		0.00356144	0.747629		0.300306	0.505056		0.083175	0.740269		0.113119	0.716138		0.0983263	0.792349		0.792759	0.460587		0.150986	0.64349		0.291319	0.743729		0.309559	0.601367		0.10887	0.813898		0.419093	0.733746		0.12809	0.762829
0.361362	0.666127		0.546031	0.730221		0.170507	0.645417		0.545644	0.670081		0.08883	0.669511		0.00121683	0.757571		0.31336	0.487026		0.347794	0.717549		0.103975	0.68253		0.10181	0.810966		0.741161	0.488083		0.378563	0.637695		0.211936	0.749487		0.597923	0.600261		0.131065	0.810993		0.424298	0.74364		0.116085	0.796101
0.36378	0.648643		0.137477	0.735858		0.182879	0.652989		0.524876	0.692278		0.0687498	0.687074		0.0795009	0.680218		0.318267	0.480988		0.381999	0.707258		0.124937	0.655537		0.0758113	0.833897		0.716921	0.520897		0.358619	0.656746		0.239104	0.745608		0.787351	0.629109		0.123891	0.81534		0.41449	0.754577		0.0546474	0.790715
0.394692	0.629826		0.0469936	0.772817		0.214614	0.640003		0.530667	0.686668		0.281897	0.60564		0.0111122	0.751369		0.334241	0.46586		0.0109109	0.784299		0.140413	0.63963		0.0789778	0.839452		0.907095	0.483288		0.0425395	0.638033		0.321229	0.722972		0.569563	0.543035		0.129548	0.80171		0.463297	0.706485		0.0369955	0.760549
0.410898	0.639274		0.0648025	0.783025		0.223972	0.578294		0.510992	0.635198		0.332367	0.600496		0.0123974	0.758208		0.329774	0.48934		0.0837854	0.773093		0.115046	0.63498		0.0828692	0.818785		0.874868	0.496055		0.29151	0.679326		0.161451	0.770045		0.655068	0.547972		0.134776	0.796133		0.468582	0.722208		0.0343061	0.735896
0.353161	0.589477		0.106493	0.782015		0.244075	0.593199		0.535632	0.626966		0.0727241	0.624496		0.0168206	0.763924		0.361553	0.516004		0.382673	0.694513		0.136957	0.650226		0.193419	0.798322		0.641736	0.474687		0.185203	0.769852		0.208732	0.72752		0.765697	0.601568		0.101667	0.754862		0.425252	0.741491		0.17659	0.681579
0.398229	0.633221		0.0906887	0.76789		0.321218	0.772038		0.485635	0.621234		0.0930371	0.666319		0.0647562	0.723687		0.307168	0.501374		0.172464	0.712943		0.0997853	0.642859		0.20868	0.821616		0.529715	0.528636		0.00565384	0.734526		0.142441	0.772439		0.805578	0.545831		0.0423153	0.787889		0.420126	0.730531		0.0769341	0.769592
0.523168	0.557474		0.0837999	0.782195		0.282685	0.751235		0.483779	0.61665		0.329115	0.58706		0.0232139	0.761478		0.299269	0.506739		0.155635	0.673849		0.114278	0.66897		0.176064	0.798219		0.641325	0.514237		0.117152	0.7504		0.062089	0.777123		0.810954	0.550563		0.0971867	0.809908		0.373202	0.719907		0.0898144	0.731317
0.594964	0.539604		0.399948	0.732747		0.0911053	0.722921		0.477653	0.613518		0.396568	0.605385		0.0282569	0.737438		0.28192	0.525749		0.00765983	0.642349		0.123847	0.614558		0.119911	0.805838		0.599225	0.469626		0.00188703	0.719006		0.238916	0.788324		0.417435	0.537319		0.110949	0.802284		0.380386	0.728687		0.147	0.696469
0.989735	0.426005		0.721225	0.729213		0.00442448	0.768408		0.502575	0.605153		0.317731	0.574439		0.112005	0.690526		0.246433	0.500255		0.363466	0.681929		0.153824	0.562201		0.0770743	0.782637		0.534021	0.456844		0.0660333	0.787572		0.307561	0.764768		0.758928	0.572569		0.0878409	0.757942		0.382702	0.744781		0.128887	0.741363
0.890874	0.503568		0.623634	0.706587		0.055735	0.750354		0.474392	0.637685		0.389971	0.581004		0.0596384	0.769471		0.278079	0.492057		0.377963	0.649279		0.144508	0.581138		0.0496308	0.809188		0.481289	0.541814		0.187787	0.669761		0.285729	0.727575		0.593348	0.557049		0.0543185	0.781148		0.391795	0.697657		0.0693806	0.751817
0.442061	0.631564		0.295967	0.698		0.214438	0.666635		0.496932	0.626701		0.182172	0.591982		0.0879648	0.666649		0.433848	0.48508		0.252514	0.686794		0.119887	0.635808		0.055466	0.782		0.505993	0.516042		0.42594	0.645641		0.131294	0.771424		0.494892	0.534739		0.00846048	0.667358		0.392796	0.72303		0.0894953	0.744562
0.297625	0.673822		0.114988	0.79912		0.159117	0.685323		0.45845	0.629454		0.29998	0.576713		0.149156	0.650113		0.539485	0.522889		0.0836526	0.711001		0.157845	0.611756		0.0586485	0.808128		0.415839	0.550561		0.0792604	0.672525		0.240184	0.720762		0.41347	0.512051		0.119135	0.641413		0.373005	0.708722		0.131967	0.725736
0.281606	0.670088		0.0747603	0.764849		0.255113	0.725104		0.454133	0.620701		0.685866	0.556239		0.295548	0.620706		0.476234	0.484375		0.323249	0.697872		0.159841	0.643567		0.0688291	0.793804		0.475597	0.493719		0.212061	0.642803		0.320266	0.721467		0.452337	0.561046		0.00931244	0.690488		0.352107	0.703517		0.0751706	0.78868
0.264591	0.708461		0.0908308	0.759095		0.317225	0.758898		0.452494	0.601507		0.399121	0.440159		0.212174	0.676097		0.34694	0.531685		0.0250598	0.695242		0.120387	0.626793		0.0768459	0.82104		0.650707	0.503926		0.267135	0.606263		0.333906	0.750392		0.36042	0.613104		0.0225049	0.77518		0.342752	0.714916		0.102158	0.738592
0.300634	0.699417		0.20203	0.729197		0.0226929	0.750183		0.448495	0.629504		0.0889405	0.602731		0.0704783	0.790013		0.316562	0.542492		0.0770445	0.727512		0.145458	0.63568		0.0701812	0.810384		0.904517	0.49396		0.102291	0.630924		0.324794	0.728348		0.262208	0.585391		0.0363121	0.770717		0.35219	0.699288		0.0269857	0.760107
0.650008	0.589792		0.0972279	0.777489		0.178939	0.691725		0.464095	0.61599		0.0728623	0.697858		0.00627029	0.744892		0.35609	0.477155		0.293834	0.662727		0.14799	0.644907		0.0999593	0.772964		0.937433	0.508612		0.203699	0.626378		0.231886	0.777158		0.299072	0.605046		0.00730436	0.795995		0.365578	0.703491		0.0647001	0.781354
0.47761	0.611924		0.332345	0.724305		0.24568	0.643822		0.47138	0.640925		0.133021	0.62219		0.0450013	0.702602		0.378946	0.479969		0.416534	0.694419		0.143308	0.635669		0.0231906	0.780057		0.883505	0.480302		0.362753	0.632205		0.110672	0.76645		0.234419	0.622089		0.0171564	0.732516		0.413317	0.680463		0.0690619	0.781753
0.306397	0.686496		0.300027	0.712256		0.18784	0.664354		0.433481	0.607565		0.106638	0.643413		0.0996118	0.720366		0.374391	0.46907		0.274554	0.685659		0.163036	0.667164		0.0139426	0.766975		0.890504	0.50329		0.0415135	0.676111		0.0517972	0.760062		0.240946	0.60018		0.00229925	0.76044		0.405334	0.732558		0.0785283	0.764852
0.283729	0.754088		0.133848	0.805357		0.421648	0.699719		0.463448	0.719351		0.123648	0.657967		0.022538	0.756538		0.101777	0.767158		0.202133	0.709621		0.220001	0.53875		0.0634927	0.779988		0.0319546	0.759319		0.173921	0.661611		0.328169	0.839397		0.000933782	0.755069		0.0204742	0.833562		0.399226	0.802506		0.0498724	0.788567
0.164669	0.690924		0.139609	0.797338		0.290936	0.686478		0.520393	0.72803		0.335672	0.614811		0.0780866	0.7702		0.149791	0.736256		0.0930722	0.729642		0.206574	0.666446		0.0175261	0.830541		0.0138134	0.750689		0.649988	0.629843		0.328456	0.825611		0.00157539	0.675303		0.0223066	0.875964		0.666165	0.793011		0.123907	0.823624
0.0606879	0.764457		0.0332953	0.826798		0.0791381	0.736211		0.452619	0.670948		0.135013	0.757265		0.0583289	0.72939		0.205923	0.661313		0.0347778	0.708373		0.166867	0.662621		0.0360642	0.852921		0.0402338	0.799912		0.215498	0.586798		0.283927	0.766068		0.118111	0.750168		0.0296	0.885432		0.645366	0.81029		0.106826	0.802953
0.0293969	0.743382		0.0354575	0.817136		0.252409	0.744813		0.471603	0.707753		0.103168	0.701967		0.0496683	0.779624		0.203611	0.633073		0.0364178	0.700908		0.112382	0.684585		0.00564942	0.869959		0.0117911	0.75754		0.621321	0.658114		0.308077	0.789186		0.019798	0.69726		0.0200401	0.878202		0.568549	0.786709		0.00371321	0.762538
0.0788602	0.727108		0.0583159	0.849001		0.209119	0.682092		0.332631	0.742089		0.0778505	0.719237		0.053104	0.778104		0.174897	0.67093		0.063536	0.687226		0.0809191	0.686743		0.0188117	0.872993		0.0712989	0.775402		0.347567	0.61855		0.290643	0.859737		0.092499	0.643813		0.0126444	0.910802		0.210435	0.800961		0.153103	0.716631
0.0647913	0.77097		0.0280173	0.804689		0.275281	0.67431		0.103908	0.824592		0.280345	0.689653		0.0156608	0.764896		0.34648	0.538166		0.105579	0.681449		0.0955124	0.625603		0.011339	0.84942		0.00771348	0.79219		0.0955497	0.698914		0.230992	0.852832		0.0784996	0.659432		0.0303891	0.910452		0.00055082	0.837085		0.0949283	0.763185
0.129911	0.714593		0.117415	0.857318		0.099884	0.715814		0.0239772	0.846904		0.142894	0.657048		0.0542953	0.766684		0.180802	0.643611		0.0180262	0.693417		0.0695548	0.644145		0.00645359	0.893781		0.131529	0.721644		0.113039	0.703967		0.081285	0.814032		0.0434781	0.695473		0.0326887	0.911584		0.04741	0.827325		0.0868576	0.791346
0.0544349	0.702124		0.134837	0.8353		0.271372	0.724441		0.0114571	0.848079		0.00182353	0.734568		0.0403481	0.739422		0.0398586	0.83313		0.44981	0.694858		0.0574088	0.683793		0.00213395	0.887313		0.228692	0.700506		0.0705689	0.700752		0.0427507	0.847175		0.0367535	0.722103		0.0271337	0.918188		0.0645777	0.781073		0.0931977	0.808169
0			0			0			0			0			0			0			0			0			0			0			0			0			0			0			0			0
0.0552135	0.714605		0.0822568	0.850757		0.373668	0.692103		0.0112823	0.855952		0.398485	0.620997		0.020145	0.801075		0.14227	0.712157		0.0362809	0.726318		0.0655859	0.806463		0.00962384	0.858979		0.037552	0.769333		0.197065	0.692198		0.333138	0.794007		0.0197085	0.683655		0.0404905	0.925197		0.0672421	0.765884		0.0793736	0.755148
0.0161805	0.738497		0.0256632	0.860311		0.138143	0.692653		0.0630478	0.838597		0.112279	0.714205		0.00331098	0.74665		0.104976	0.694783		0.0609021	0.70499		0.0439909	0.785431		0.000481998	0.889218		0.166445	0.625999		0.0309399	0.690499		0.336177	0.79418		0.127419	0.666179		0.0291012	0.913748		0.0144924	0.810121		0.190485	0.783705
0.0138043	0.756477		0.231421	0.791464		0.048882	0.667274		0.00724226	0.842556		0.287117	0.603314		0.0243916	0.81163		0.238817	0.637125		0.124809	0.698383		0.00263729	0.739539		0.0166632	0.830541		0.175023	0.6527		0.0416155	0.726031		0.323396	0.816352		0.0709604	0.692082		0.0471263	0.931006		0.075923	0.819917		0.215383	0.758828
0.0967898	0.696425		0.0748823	0.826418		0.202928	0.733693		0.0114899	0.837949		0.206529	0.720115		0.0255412	0.769264		0.268389	0.566646		0.129931	0.751107		0.017342	0.757703		0.0388479	0.856822		0.10456	0.829453		0.0326545	0.738887		0.397882	0.759998		0.0534747	0.707171		0.0333973	0.927821		0.0550666	0.807501		0.131957	0.773376
0.0298705	0.739405		0.167597	0.812909		0.312801	0.683459		0.148491	0.78116		0.340205	0.604028		0.00219303	0.75255		0.168412	0.638652		0.0763606	0.720816		0.0425663	0.642081		0.0452682	0.850968		0.0226696	0.749195		0.231227	0.67504		0.289823	0.834875		0.0745916	0.627046		0.018948	0.927762		0.633528	0.79308		0.217402	0.782553
0.0366838	0.748277		0.00989477	0.80589		0.266493	0.716346		0.0469896	0.776899		0.138876	0.720704		0.00978571	0.758591		0.343646	0.475987		0.0242455	0.749215		0.0941942	0.761653		0.0220337	0.87828		0.0790802	0.712997		0.0245532	0.705428		0.310201	0.832831		0.0576196	0.682101		0.0237742	0.9275		0.524521	0.819341		0.0695896	0.780691
0.0105568	0.79086		0.0594737	0.76911		0.205959	0.691431		0.0377166	0.794372		0.00291342	0.756498		0.0145064	0.738458		0.249512	0.597566		0.0676946	0.74047		0.031691	0.765132		0.0583595	0.85173		0.137185	0.701331		0.102712	0.753361		0.257906	0.820656		0.0997272	0.68268		0.0216967	0.914154		0.475636	0.824379		0.0980168	0.784746
0.0719044	0.675018		0.154824	0.813071		0.0609435	0.613813		0.0108972	0.839046		0.072395	0.685998		0.0257197	0.753911		0.261208	0.562224		0.0483223	0.702026		0.0413011	0.72544		0.0538177	0.857941		0.0305474	0.774838		0.0462533	0.696259		0.253033	0.791097		0.0394547	0.750671		0.00754144	0.920218		0.0779809	0.746906		0.128728	0.784001
0.0499663	0.685567		0.318018	0.812663		0.110158	0.716637		0.0182447	0.833144		0.088649	0.720456		0.0114985	0.78767		0.00347636	0.792793		0.185333	0.681062		0.0454159	0.804554		0.0347603	0.846109		0.0340133	0.729381		0.517961	0.637018		0.232407	0.736068		0.0291235	0.661427		0.0233642	0.916471		0.100783	0.772019		0.00654547	0.767244
0.0278048	0.729357		0.101657	0.825765		0.0661928	0.780281		0.303511	0.718748		0.0802894	0.663618		0.0486138	0.709979		0.116113	0.719322		0.0126693	0.697936		0.0163757	0.774491		0.0328715	0.865503		0.0122704	0.752448		0.11322	0.718792		0.068254	0.8307		0.0912335	0.660287		0.0109559	0.926959		0.0100716	0.829219		0.00596515	0.770888
0.0368999	0.715137		0.230022	0.726657		0.364147	0.683262		0.0882414	0.75609		0.0199834	0.740875		0.0320943	0.743622		0.248498	0.610424		0.0508518	0.734431		0.0193746	0.7559		0.0218689	0.85684		0.195441	0.624425		0.102863	0.760375		0.275725	0.825184		0.0558498	0.682146		0.00777713	0.907208		0.251262	0.771084		0.0194345	0.8039
0.0161068	0.744613		0.304818	0.742202		0.109166	0.676754		0.107844	0.81254		0.0235904	0.732816		0.0264125	0.724796		0.181537	0.633514		0.102084	0.697311		0.00435723	0.771417		0.0194846	0.8533		0.0604934	0.800461		0.00827246	0.706539		0.366675	0.791945			0.637762		0.00929532	0.897883		0.0689513	0.766678		0.00254782	0.784937
0.0133019	0.65958		0.148446	0.710453		0.112866	0.72029		0.0187663	0.802931		0.0350796	0.69946		0.0727889	0.69047		0.288711	0.54677		0.267817	0.686771		0.0810611	0.6769		0.00478916	0.836586		0.00401973	0.698897		0.0853883	0.745666		0.385083	0.800756		0.12853	0.690386		0.0205693	0.918409		0.0873121	0.807737		0.0179259	0.809635
0.0847996	0.727528		0.0189582	0.706766		0.236904	0.713738		0.0390068	0.788773		0.0214927	0.78259		0.0308815	0.733421		0.2738	0.490761		0.0304761	0.710831		0.0365223	0.742856		0.0392917	0.730245		0.045526	0.770586		0.279033	0.702962		0.311637	0.843056		0.0536631	0.658164		0.00313277	0.90463		0.124426	0.782317		0.0216896	0.802725
0.0748149	0.687839		0.0162906	0.83324		0.143932	0.652476		0.0846488	0.812896		0.191179	0.708257		0.0565377	0.736722		0.104179	0.714205		0.12467	0.687997		0.0476332	0.757836		0.0875935	0.790591		0.169699	0.624779		0.20035	0.674367		0.0934806	0.796519			0.659584		0.020951	0.905766		0.212863	0.789776		0.00568417	0.828011
0.00561052	0.628628		0.10375	0.840201		0.109239	0.668733		0.0244578	0.824405		0.176824	0.749005		0.00971726	0.76492		0.251281	0.570328		0.11593	0.730372		0.0155177	0.765827		0.0964053	0.812111		0.0125912	0.740496		0.615478	0.651468		0.203349	0.850254		0.0923769	0.646717		0.00600624	0.905906		0.0862218	0.770632		0.017812	0.726861
0.019818	0.707676		0.0728889	0.850666		0.122715	0.618304		0.0118861	0.78312		0.181994	0.687448		0.0113552	0.738114		0.449159	0.503648		0.0232357	0.737082		0.019446	0.750025		0.0772515	0.79191		0.0764413	0.722818		0.122301	0.641084		0.378824	0.745957		0.101942	0.709391		0.0106521	0.908226		0.122493	0.754731		0.0325599	0.785587
0.0461006	0.718495		0.448398	0.778517		0.124991	0.648226		0.000608058	0.821361		0.398853	0.628866		0.0172053	0.700721		0.055437	0.674609		0.142971	0.680998		0.02765	0.694332		0.10124	0.789736		0.0544052	0.717009		0.0916779	0.747868		0.372922	0.755731		0.254781	0.603504		0.0190251	0.909569		0.134241	0.770622		0.0148802	0.814901
0.982773	0.548368		0.917519	0.776354		0.105717	0.64796		0.0314307	0.809812		0.0879748	0.758033		0.00917802	0.769849		0.214013	0.588555		0.364087	0.692818		0.0285344	0.75661		0.062906	0.780211		0.0117177	0.700546		0.0914602	0.712632		0.335833	0.784976		0.271597	0.684902		0.0172673	0.883878		0.183951	0.774101		0.0470905	0.788816
0.923455	0.552886		0.826339	0.785378		0.096514	0.695167		0.0108729	0.823784		0.3071	0.692026		0.0630257	0.703189		0.342719	0.489814		0.0381584	0.700202		0.0283094	0.782627		0.0383236	0.829386		0.225267	0.638653		0.0220037	0.737162		0.408589	0.7429		0.0423789	0.646815		0.00329048	0.90519		0.0966593	0.71591		0.0720308	0.707479
0.609078	0.6563		0.61232	0.770955		0.109114	0.653077		0.145761	0.78322		0.0790761	0.681576		0.00802149	0.717346		0.0396962	0.741801		0.014834	0.71219		0.00535368	0.772549		0.0270305	0.8402		0.1513	0.679514		0.0743083	0.787805		0.285908	0.773431		0.195865	0.650753		0.00133058	0.901524		0.0758254	0.719433		0.0216914	0.779009
0.789221	0.665414		0.640655	0.671846		0.485428	0.596668		0.592392	0.6877		0.0373099	0.677771		0.192733	0.696347		0.640271	0.555386		0.158567	0.719249		0.142882	0.603687		0.0809571	0.729218		0.814232	0.592231		0.084887	0.676941		0.429281	0.707229		0.941416	0.607652		0.0645556	0.771617		0.189265	0.688532		0.0803349	0.710608
0.687391	0.609112		0.952511	0.72079		0.537979	0.578435		0.744651	0.648221		0.0581264	0.655985		0.173718	0.744605		0.553739	0.55666		0.723294	0.677845		0.0162415	0.568838		0.0965578	0.81748		0.784819	0.583413		0.0284467	0.70322		0.0372069	0.809861		0.968968	0.633939		0.0654589	0.773549		0.611472	0.728115		0.103284	0.739575
0.404838	0.700618		0.875581	0.719401		0.403849	0.579142		0.642806	0.647579		0.308102	0.572541		0.124792	0.733104		0.466223	0.553158		0.189047	0.735		0.123438	0.561385		0.103836	0.822383		0.760183	0.556134		0.148227	0.701649		0.0341492	0.755083		0.886178	0.602401		0.0857883	0.770204		0.523501	0.728979		0.105749	0.783653
0.408043	0.67073		0.590813	0.71719		0.174367	0.525775		0.436067	0.663433		0.19062	0.663327		0.111077	0.692258		0.405186	0.526397		0.0953309	0.726934		0.0489617	0.549606		0.118755	0.80826		0.751408	0.574078		0.0114341	0.718957		0.161695	0.749778		0.860252	0.590354		0.116741	0.758449		0.520688	0.718204		0.102603	0.756508
0.51843	0.609823		0.240802	0.716377		0.0481427	0.637372		0.475634	0.677705		0.263637	0.592738		0.13336	0.696143		0.4294	0.532153		0.271331	0.713908		0.164636	0.575024		0.128444	0.777892		0.761638	0.594553		0.0906407	0.68372		0.142207	0.696194		0.591903	0.61925		0.108427	0.749992		0.486132	0.732915		0.11115	0.760365
0.415869	0.668737		0.23366	0.738569		0.0282171	0.582648		0.471599	0.677409		0.0129569	0.691324		0.0501595	0.668358		0.432183	0.530169		0.462606	0.672029		0.321428	0.572595		0.102607	0.787519		0.584503	0.555037		0.184979	0.695138		0.214522	0.747958		1.00405	0.632981		0.0567947	0.781724		0.40678	0.722902		0.10769	0.769073
0.3988	0.672321		0.328014	0.715391		0.00310981	0.567999		0.719977	0.638294		0.0830242	0.625671		0.143442	0.735717		0.411809	0.51895		0.437504	0.678815		0.288774	0.725714		0.112294	0.828566		0.754174	0.561288		0.034905	0.676342		0.169988	0.754671		0.977696	0.647579		0.0264405	0.803053		0.425693	0.706743		0.107488	0.756219
0.376764	0.688004		0.24496	0.725493		0.0322857	0.587866		0.651666	0.672419		0.197623	0.664658		0.0732156	0.704059		0.418343	0.516407		0.608301	0.67019		0.209632	0.743089		0.130547	0.825856		0.465199	0.577381		0.0824331	0.693487		0.00529711	0.798728		0.554095	0.641262		0.049372	0.787774		0.418666	0.731894		0.0176108	0.807301
0.650207	0.614998		0.266912	0.756842		0.105595	0.652681		0.580412	0.66451		0.295571	0.525424		0.0402413	0.724397		0.416364	0.520845		0.171889	0.72676		0.174784	0.669434		0.134855	0.802568		0.735806	0.558931		0.350844	0.693717		0.00394518	0.801991		0.654329	0.596381		0.0896271	0.793271		0.319614	0.702424		0.0353334	0.734203
0.614251	0.594136		0.223963	0.708429		0.540671	0.608486		0.56255	0.660198		0.0625138	0.653814		0.0490945	0.665156		0.428159	0.513411		0.153564	0.727725		0.125251	0.708534		0.111309	0.827052		0.43024	0.560079		0.0159708	0.634771		0.226615	0.746025		0.377485	0.599499		0.0839831	0.789465		0.430666	0.745431		0.0938186	0.70205
0.422098	0.617484		0.226951	0.760936		0.353851	0.576425		0.561683	0.672538		0.10897	0.631445		0.084128	0.651857		0.420523	0.527636		0.355608	0.677818		0.0965441	0.69281		0.114801	0.804608		0.55102	0.571643		0.0468336	0.691862		0.178687	0.77979		0.302858	0.632017		0.0606549	0.749928		0.458926	0.733127		0.130779	0.719837
0.361862	0.684998		0.509855	0.726419		0.021697	0.640506		0.563103	0.64217		0.440491	0.527186		0.0367867	0.704049		0.340165	0.512668		0.532985	0.677288		0.170528	0.719828		0.0961924	0.786795		0.564067	0.505605		0.0804169	0.660345		0.248568	0.714227		0.272806	0.631263		0.0817363	0.803653		0.483671	0.718528		0.221288	0.730451
0.415797	0.648048		0.680868	0.707844		0.100865	0.590591		0.557101	0.6603		0.0870065	0.733471		0.0415649	0.719579		0.353219	0.508228		0.102016	0.717507		0.161384	0.718716		0.0996759	0.78898		0.51247	0.534817		0.307995	0.655506		0.169185	0.735945		0.561169	0.602921		0.103932	0.796723		0.488875	0.72557		0.209282	0.718708
0.418215	0.613592		0.272313	0.706103		0.0884933	0.564901		0.536333	0.675771		0.0669263	0.703719		0.0391528	0.649964		0.358125	0.508057		0.0678106	0.733741		0.182346	0.652051		0.0736773	0.82391		0.48823	0.581107		0.28805	0.660786		0.196353	0.743663		0.750598	0.612539		0.0967578	0.810239		0.479068	0.743121		0.147845	0.73328
0.449127	0.673469		0.181831	0.73499		0.056758	0.549539		0.542124	0.686681		0.280073	0.578779		0.0292359	0.694954		0.374099	0.498058		0.438899	0.693434		0.197821	0.666752		0.0768439	0.830007		0.678403	0.529194		0.0280294	0.705502		0.278479	0.715757		0.532809	0.609105		0.102415	0.791968		0.527875	0.682159		0.130193	0.725409
0.465333	0.625483		0.199639	0.754593		0.0474002	0.536991		0.522449	0.637331		0.330543	0.583878		0.0279507	0.693658		0.369632	0.526055		0.533595	0.708817		0.172455	0.640109		0.0807353	0.802036		0.646177	0.54223		0.362079	0.637047		0.118701	0.770012		0.618314	0.576269		0.107642	0.798365		0.533159	0.699849		0.0588916	0.737026
0.407596	0.664308		0.24133	0.753249		0.0272978	0.570046		0.547089	0.623828		0.0709006	0.713122		0.0571687	0.724449		0.401411	0.530885		0.0671372	0.702219		0.194366	0.635811		0.191285	0.776974		0.413044	0.553147		0.255772	0.671918		0.165981	0.725965		0.728944	0.601728		0.0745338	0.751611		0.48983	0.718112		0.0833925	0.708977
0.452664	0.646844		0.225526	0.766792		0.59259	0.62951		0.497092	0.622137		0.0912136	0.65986		0.0244081	0.716605		0.347027	0.532662		0.277346	0.702206		0.157194	0.663777		0.206546	0.82314		0.301024	0.591479		0.0762228	0.684676		0.0996899	0.748856		0.768824	0.581422		0.0151816	0.803337		0.484704	0.723635		0.0162635	0.714555
0.577602	0.621034		0.218637	0.75517		0.554058	0.595576		0.495236	0.597981		0.327291	0.561031		0.063562	0.703305		0.339127	0.534707		0.605445	0.602129		0.171687	0.663755		0.17393	0.805493		0.412634	0.583832		0.0465826	0.75421		0.10484	0.817804		0.7742	0.569856		0.070053	0.813499		0.43778	0.721725		0.00338325	0.794806
0.649399	0.593139		0.534785	0.694899		0.362478	0.63116		0.489111	0.604015		0.394745	0.57997		0.068605	0.719017		0.321779	0.540632		0.44215	0.625757		0.181256	0.63607		0.117777	0.814324		0.370533	0.553903		0.072456	0.700929		0.196166	0.78603		0.380682	0.605626		0.0838157	0.798671		0.444964	0.701509		0.0538019	0.659707
1.04417	0.467144		0.856062	0.705447		0.275797	0.619989		0.514032	0.598225		0.315907	0.621938		0.0716573	0.658222		0.286292	0.526193		0.0863442	0.680219		0.211233	0.606109		0.0749403	0.778641		0.30533	0.538799		0.00453567	0.667388		0.26481	0.738749		0.722174	0.605335		0.0607073	0.769679		0.44728	0.711348		0.0356891	0.738613
0.945309	0.515117		0.758471	0.683981		0.215637	0.637059		0.485849	0.625883		0.388148	0.576845		0.0999865	0.727086		0.317937	0.521718		0.0718465	0.665103		0.201917	0.634411		0.0474968	0.800968		0.252597	0.61665		0.117218	0.715648		0.242979	0.728814		0.556594	0.619236		0.0271848	0.784155		0.456373	0.700044		0.023817	0.728499
0.496496	0.623598		0.430804	0.671572		0.0569343	0.60646		0.508389	0.619351		0.180348	0.62145		0.0476167	0.673496		0.473707	0.53304		0.197295	0.694253		0.177296	0.679809		0.0533321	0.77423		0.277301	0.570997		0.355371	0.702834		0.0885431	0.769085		0.458138	0.534227		0.0186732	0.656221		0.457373	0.704876		0.00370237	0.725177
0.35206	0.644236		0.249825	0.737034		0.112256	0.649581		0.469907	0.615453		0.298157	0.540083		0.108808	0.614919		0.579343	0.550641		0.366157	0.6399		0.215254	0.656613		0.0565145	0.787392		0.187147	0.620539		0.00869148	0.638397		0.197433	0.72221		0.376717	0.582199		0.146269	0.649135		0.437582	0.70308		0.0387696	0.701862
0.33604	0.664417		0.209597	0.739011		0.526486	0.603531		0.46559	0.607222		0.684042	0.531503		0.2552	0.613288		0.516093	0.526926		0.126561	0.661777		0.21725	0.700747		0.0666952	0.774616		0.246906	0.563276		0.141492	0.700587		0.277515	0.724563		0.415584	0.581072		0.0178212	0.695359		0.416684	0.685104		0.018027	0.769591
0.319026	0.676001		0.225668	0.739693		0.588598	0.578793		0.463951	0.586052		0.397298	0.450799		0.171826	0.665501		0.386799	0.550918		0.42475	0.632045		0.177796	0.686676		0.0747119	0.807819		0.422016	0.533183		0.196566	0.668814		0.291155	0.712034		0.323666	0.640021		0.0046288	0.787646		0.407329	0.700343		0.00896045	0.742237
0.355069	0.651483		0.336867	0.733001		0.294065	0.601105		0.459952	0.624735		0.087117	0.625518		0.110826	0.678665		0.35642	0.546385		0.526854	0.652114		0.202867	0.682763		0.0680473	0.786933		0.675826	0.507957		0.0317223	0.70059		0.282043	0.726272		0.225454	0.657342		0.00917847	0.770312		0.416768	0.679366		0.066212	0.747293
0.704443	0.614453		0.232065	0.744038		0.0924335	0.644371		0.475552	0.601203		0.0710387	0.738564		0.0466184	0.674449		0.395948	0.520549		0.155975	0.66022		0.205399	0.684943		0.0978254	0.753399		0.708741	0.545166		0.13313	0.673195		0.189135	0.787248		0.262319	0.638144		0.0198293	0.80004		0.430156	0.684617		0.0284976	0.81364
0.532045	0.601116		0.467181	0.733931		0.025692	0.641138		0.482838	0.63155		0.131197	0.714105		0.00465317	0.686886		0.418804	0.505994		0.0332756	0.708463		0.200717	0.683402		0.0253246	0.747346		0.654813	0.540994		0.292184	0.624874		0.153423	0.77916		0.197666	0.672136		0.00997729	0.730829		0.477895	0.686369		0.0241357	0.739434
0.360832	0.678364		0.434864	0.668639		0.0835321	0.60529		0.444938	0.606905		0.104814	0.681881		0.0592637	0.620249		0.41425	0.499009		0.175255	0.680471		0.220444	0.660968		0.0160766	0.744544		0.661813	0.534377		0.0290554	0.692432		0.094548	0.753826		0.204193	0.652085		0.0294329	0.740779		0.469912	0.711229		0.0146694	0.740728
0.228515	0.747413		0.216105	0.818685		0.0479797	0.867058		0.47473	0.726368		0.274837	0.644883		0.002393	0.790841		0.0404924	0.676033		0.238414	0.716712		0.154415	0.570837		0.0538689	0.789398		0.0695066	0.774995		0.0231439	0.795483		0.00496897	0.787956		0.0187747	0.705932		0.0200164	0.843387		0.466468	0.811507		0.129246	0.736189
0.109455	0.716113		0.221866	0.813891		0.0827318	0.87454		0.531675	0.759993		0.0628131	0.868938		0.0579416	0.787604		0.00752166	0.707154		0.129353	0.695482		0.140988	0.687142		0.00790222	0.810879		0.0237386	0.714599		0.452923	0.753432		0.00468227	0.796745		0.0212839	0.696334		0.018184	0.890819		0.733407	0.788508		0.203281	0.747116
0.00547439	0.79991		0.115552	0.848389		0.29453	0.800292		0.463901	0.667658		0.263472	0.607171		0.0381839	0.792556		0.0636531	0.695114		0.00150304	0.685342		0.101281	0.703486		0.0264404	0.840553		0.0777858	0.726265		0.0184332	0.765085		0.0492116	0.758468		0.098403	0.71207		0.0108906	0.894331		0.712608	0.779363		0.1862	0.738419
0.0258165	0.761094		0.117714	0.838101		0.121259	0.881635		0.482885	0.693793		0.295317	0.652986		0.0698133	0.769135		0.0613418	0.691113		0.000136939	0.780337		0.0467963	0.743196		0.00397443	0.844702		0.0257608	0.767445		0.424257	0.773109		0.0250609	0.828507		8.95818e-05	0.792466		0.0204504	0.901768		0.635791	0.773009		0.0830868	0.731659
0.0236467	0.791356		0.0239409	0.843134		0.164549	0.841701		0.343914	0.735068		0.320635	0.655753		0.032959	0.816878		0.0326273	0.639407		0.0272551	0.745862		0.0153332	0.72862		0.0284355	0.850369		0.033747	0.718862		0.150503	0.770958		0.0424953	0.826156		0.112207	0.700228		0.0278462	0.926664		0.277677	0.720774		0.0737295	0.740443
0.00957787	0.799288		0.0542396	0.796418		0.098387	0.893636		0.11519	0.808402		0.11814	0.78999		0.0358058	0.792729		0.204211	0.562863		0.0692984	0.72042		0.0299265	0.699163		0.0209629	0.872238		0.0452654	0.76218		0.101515	0.779641		0.102146	0.834035		0.0982081	0.706224		0.0101015	0.920054		0.0666913	0.769737		0.174302	0.753176
0.074698	0.814877		0.199672	0.808372		0.273784	0.847233		0.0352595	0.849161		0.255591	0.663472		0.0341503	0.798893		0.0385323	0.584602		0.0543071	0.727928		0.00396893	0.71599		0.00317025	0.874029		0.0939774	0.712244		0.0840251	0.745046		0.251853	0.812611		0.0631865	0.722834		0.00780182	0.934977		0.0198322	0.798364		0.166231	0.727061
0.00077856	0.814589		0.217094	0.850769		0.102296	0.885596		0.0227395	0.847665		0.400309	0.639068		0.0202031	0.793775		0.182128	0.708166		0.486091	0.712189		0.00817711	0.743267		0.0117578	0.883367		0.19114	0.702192		0.126496	0.811085		0.375889	0.794604		0.0564619	0.730861		0.0133569	0.94435		0.13182	0.777979		0.172571	0.732613
0.0552135	0.714605		0.0822568	0.850757		0.373668	0.692103		0.0112823	0.855952		0.398485	0.620997		0.020145	0.801075		0.14227	0.712157		0.0362809	0.726318		0.0655859	0.806463		0.00962384	0.858979		0.037552	0.769333		0.197065	0.692198		0.333138	0.794007		0.0197085	0.683655		0.0404905	0.925197		0.0672421	0.765884		0.0793736	0.755148
0			0			0			0			0			0			0			0			0			0			0			0			0			0			0			0			0
0.0713939	0.755456		0.10792	0.799491		0.235525	0.834238		0.0743301	0.843667		0.286206	0.653076		0.0234559	0.772234		0.0372931	0.676617		0.0246212	0.721132		0.021595	0.837002		0.0101058	0.900581		0.128893	0.674934		0.166125	0.718744		0.00303863	0.829066		0.147128	0.643437		0.0113894	0.927802		0.0527497	0.782361		0.111111	0.806968
0.0690177	0.764522		0.313677	0.791231		0.42255	0.691579		0.00404006	0.843546		0.111368	0.677653		0.0445365	0.823797		0.0965479	0.671927		0.0885286	0.655348		0.0629486	0.783828		0.026287	0.812294		0.137471	0.683054		0.23868	0.739001		0.00974256	0.815317		0.0906688	0.686564		0.00663572	0.940762		0.00868083	0.766523		0.136009	0.728589
0.0415763	0.820394		0.157139	0.820054		0.17074	0.805369		0.0227722	0.848525		0.191956	0.601073		0.00539625	0.773341		0.126119	0.593263		0.0936503	0.759812		0.0482439	0.806012		0.0484718	0.862846		0.142112	0.776132		0.16441	0.771328		0.0647441	0.826847		0.0731832	0.670903		0.00709324	0.942399		0.0121755	0.7714		0.052583	0.765417
0.0253429	0.786186		0.249854	0.777109		0.0608669	0.908886		0.159773	0.780778		0.0582801	0.723272		0.0179519	0.764864		0.0261429	0.664692		0.0400798	0.724797		0.108152	0.676916		0.054892	0.88982		0.0148824	0.766837		0.428291	0.645737		0.043315	0.811936		0.0943	0.647817		0.0215425	0.943138		0.70077	0.789548		0.138028	0.775166
0.0185296	0.755626		0.0723621	0.851954		0.107175	0.889344		0.0582719	0.787214		0.259609	0.626771		0.0299307	0.799806		0.201377	0.4952		0.0120354	0.720251		0.0286083	0.844179		0.0316575	0.842485		0.0415283	0.729319		0.172511	0.742779		0.022937	0.816758		0.0773281	0.664463		0.0167163	0.933033		0.591763	0.792971		0.00978399	0.755345
0.0657702	0.696432		0.141731	0.838644		0.167709	0.858312		0.048999	0.793981		0.401398	0.653222		0.0346514	0.775782		0.107242	0.558015		0.0314137	0.722025		0.0338949	0.845815		0.0679833	0.848576		0.0996328	0.7396		0.299776	0.663169		0.0752323	0.842273		0.119436	0.655584		0.0187938	0.939028		0.542878	0.787593		0.0186432	0.711968
0.0166909	0.723243		0.0725676	0.826837		0.312725	0.837282		0.0221795	0.798301		0.32609	0.569617		0.00557477	0.781194		0.118939	0.648917		0.0120414	0.735075		0.0242848	0.815385		0.0634416	0.858619		0.0680993	0.770765		0.243318	0.678964		0.0801051	0.783781		0.0197463	0.733784		0.0329491	0.937416		0.145223	0.730798		0.0493544	0.788153
0.00524713	0.744998		0.400274	0.77682		0.483826	0.685046		0.0295271	0.864524		0.309836	0.687123		0.00864648	0.766565		0.138793	0.678158		0.221614	0.712848		0.02017	0.838734		0.0443841	0.855948		0.00353864	0.715471		0.320897	0.754831		0.100732	0.741309		0.0488319	0.710297		0.0171263	0.94404		0.168025	0.751998		0.0728281	0.725433
0.0274086	0.739298		0.183914	0.833001		0.307475	0.702811		0.314794	0.702036		0.318196	0.623222		0.0687588	0.740118		0.0261561	0.708188		0.0236116	0.728718		0.0492102	0.871992		0.0424954	0.854229		0.0252815	0.759529		0.0838444	0.783241		0.401392	0.789967		0.110942	0.678859		0.0295347	0.933564		0.0773137	0.805166		0.0853387	0.748885
0.0183135	0.770988		0.312278	0.720436		0.00952157	0.901657		0.0995237	0.776661		0.418468	0.629181		0.0522392	0.740215		0.106229	0.634674		0.0871327	0.747529		0.0462113	0.834722		0.0314927	0.873575		0.157889	0.619189		0.0942015	0.75237		0.0574135	0.833855		0.0361413	0.742822		0.0482677	0.917714		0.318504	0.722803		0.0599391	0.781039
0.0713203	0.691285		0.387075	0.689744		0.264502	0.789841		0.119126	0.782344		0.422075	0.605088		0.0465574	0.731054		0.039267	0.703493		0.138365	0.692357		0.0612287	0.84769		0.00986076	0.844989		0.0980453	0.732763		0.188792	0.710891		0.0335371	0.865807			0.723751		0.0311952	0.926352		0.00170911	0.789409		0.0819214	0.693511
0.0685154	0.775368		0.230702	0.714582		0.260802	0.763108		0.0300486	0.796122		0.363405	0.635974		0.0929338	0.712019		0.146442	0.523196		0.304098	0.690459		0.0154752	0.745965		0.014413	0.841231		0.0335322	0.722728		0.282453	0.682584		0.0519445	0.811389		0.148238	0.768945		0.0199213	0.926505		0.0200699	0.771522		0.0972995	0.720786
0.140013	0.740235		0.101215	0.737204		0.136764	0.871575		0.0502891	0.837889		0.419978	0.654252		0.0107365	0.777291		0.131531	0.550079		0.066757	0.749891		0.0290636	0.810876		0.0489155	0.74837		0.0830779	0.729284		0.476097	0.627753		0.0215013	0.808277		0.0339546	0.694554		0.0373578	0.931314		0.0571838	0.782151		0.101063	0.72396
0.130028	0.75288		0.0985474	0.810695		0.229736	0.840544		0.0959311	0.804348		0.207306	0.735562		0.0363927	0.780981		0.0380902	0.674063		0.0883891	0.72958		0.0179527	0.81689		0.0972174	0.778878		0.132147	0.677574		0.00328566	0.711621		0.239658	0.801594			0.671762		0.0195395	0.922196		0.280106	0.798512		0.0850577	0.708306
0.0496029	0.773206		0.021493	0.839763		0.482907	0.636725		0.0357401	0.807455		0.221661	0.684465		0.0104277	0.741619		0.109011	0.620935		0.0796492	0.739343		0.0811036	0.839756		0.106029	0.804258		0.0501432	0.644303		0.418414	0.768264		0.12979	0.824687		0.112085	0.675589		0.0344843	0.92379		0.153464	0.730119		0.0615616	0.713998
0.0353955	0.707334		0.155146	0.797997		0.496383	0.630002		0.000603778	0.841082		0.216491	0.732995		0.0315001	0.749922		0.30689	0.498431		0.0130452	0.717074		0.0850319	0.832297		0.0868753	0.825263		0.0388893	0.712558		0.0747634	0.76975		0.045686	0.804844		0.082234	0.676759		0.0511426	0.919692		0.0552504	0.779811		0.111933	0.693655
0.101314	0.740293		0.530655	0.781277		0.498659	0.619323		0.0106743	0.845355		0.000367936	0.79946		0.0373502	0.71365		0.0868325	0.65648		0.106691	0.683048		0.0932359	0.769143		0.110864	0.789039		0.0168532	0.71306		0.105387	0.742806		0.0397838	0.804334		0.274489	0.669278		0.0214655	0.927364		0.0669993	0.802012		0.0644934	0.731241
0.927559	0.54745		0.999776	0.747462		0.479385	0.674036		0.042713	0.842955		0.31051	0.586173		0.0109669	0.786291		0.0717431	0.644004		0.400368	0.717014		0.0370515	0.823862		0.0725299	0.775957		0.0492696	0.749212		0.105604	0.730683		0.00269449	0.833093		0.251889	0.625136		0.0232232	0.897716		0.251193	0.716613		0.0322831	0.700007
0.868241	0.566661		0.908596	0.763118		0.470182	0.641221		0.0221552	0.860795		0.0913846	0.733091		0.0428807	0.751729		0.20045	0.520797		0.00187757	0.724204		0.0372765	0.852384		0.0479474	0.808575		0.187715	0.636707		0.175061	0.695332		0.075451	0.761835		0.0226704	0.701395		0.0372001	0.914403		0.0294171	0.767055		0.00734279	0.736523
0.553865	0.649506		0.694576	0.743766		0.482782	0.641511		0.157043	0.785988		0.319409	0.714243		0.0121235	0.715953		0.181966	0.649655		0.0214469	0.735356		0.0709396	0.829027		0.0366544	0.837351		0.188852	0.677519		0.122756	0.693409		0.0472307	0.808171		0.176156	0.66282		0.0418211	0.912592		0.00858322	0.766614		0.0576822	0.725243
0.734007	0.658296		0.722912	0.668462		0.11176	0.674211		0.603674	0.703612		0.361175	0.623138		0.172588	0.730646		0.782541	0.48875		0.194848	0.720139		0.0772958	0.635273		0.0713332	0.736047		0.851784	0.608283		0.112178	0.76922		0.762419	0.682727		0.921707	0.551053		0.105046	0.78723		0.256507	0.654892		0.159708	0.641625
0.632177	0.648698		1.03477	0.695777		0.164311	0.776283		0.755933	0.678939		0.340359	0.5228		0.153573	0.758481		0.696008	0.506645		0.759575	0.702163		0.0818274	0.657301		0.086934	0.799965		0.822371	0.602457		0.225511	0.697746		0.370345	0.757549		0.949259	0.565055		0.105949	0.789409		0.678715	0.708445		0.182658	0.670849
0.349624	0.699976		0.957837	0.684504		0.0301814	0.800192		0.654088	0.668029		0.0903832	0.656285		0.104647	0.772526		0.608493	0.500428		0.225328	0.713752		0.189024	0.624145		0.0942119	0.824425		0.797735	0.587184		0.345292	0.684668		0.298989	0.74988		0.86647	0.552078		0.126279	0.77724		0.590743	0.707713		0.185123	0.677887
0.352829	0.739542		0.67307	0.67764		0.199301	0.748903		0.447349	0.68551		0.207865	0.550995		0.0909317	0.713205		0.547456	0.472623		0.131612	0.744368		0.114548	0.630898		0.109131	0.821732		0.78896	0.592134		0.208499	0.753871		0.171444	0.75256		0.840543	0.543296		0.157232	0.771396		0.58793	0.714307		0.181977	0.666084
0.463217	0.684187		0.323059	0.708094		0.325525	0.657612		0.486917	0.690245		0.134848	0.667331		0.113215	0.706137		0.571669	0.475414		0.307612	0.721919		0.0990496	0.672821		0.11882	0.793448		0.79919	0.599408		0.287705	0.728635		0.190932	0.711273		0.572194	0.591107		0.148917	0.751346		0.553374	0.717987		0.190524	0.695101
0.360656	0.699329		0.315917	0.718954		0.345451	0.620909		0.482882	0.688161		0.411442	0.538278		0.0300145	0.678243		0.574452	0.487232		0.498887	0.667665		0.255842	0.678246		0.0929832	0.788802		0.622055	0.574973		0.382044	0.653487		0.118616	0.749993		0.984342	0.572537		0.0972853	0.794663		0.474022	0.716054		0.187064	0.695237
0.343586	0.698082		0.410271	0.700461		0.370558	0.564389		0.731259	0.646986		0.315461	0.526082		0.123297	0.752752		0.554079	0.477711		0.473785	0.700846		0.223188	0.807214		0.10267	0.809503		0.791726	0.574677		0.16216	0.709761		0.16315	0.761966		0.957987	0.585927		0.066931	0.824961		0.492935	0.672681		0.186861	0.69753
0.32155	0.734883		0.327217	0.689144		0.341382	0.642718		0.662948	0.685549		0.200862	0.686908		0.0530706	0.673878		0.560613	0.474977		0.644582	0.689907		0.144046	0.818227		0.120923	0.820888		0.502751	0.631178		0.279498	0.611143		0.327841	0.743543		0.534387	0.612789		0.0898626	0.811178		0.485908	0.710369		0.0969844	0.747983
0.594993	0.665795		0.349169	0.712327		0.268073	0.611059		0.591694	0.685402		0.102914	0.66753		0.0200964	0.710636		0.558633	0.453321		0.20817	0.708268		0.109198	0.77573		0.125231	0.81744		0.773358	0.584224		0.547908	0.595018		0.329193	0.749057		0.634621	0.544648		0.130118	0.816215		0.386856	0.706511		0.114707	0.706214
0.559037	0.662135		0.306219	0.699692		0.167003	0.794196		0.573833	0.668277		0.335971	0.572853		0.0692394	0.660528		0.570429	0.464593		0.189845	0.734529		0.0596652	0.797453		0.101686	0.815114		0.467792	0.561499		0.181094	0.633266		0.106523	0.751795		0.357776	0.60737		0.124474	0.794803		0.497908	0.721403		0.173192	0.655292
0.366884	0.672624		0.309208	0.717229		0.0198176	0.785096		0.572965	0.688912		0.289515	0.482975		0.104273	0.632742		0.562792	0.485675		0.391889	0.720531		0.0309582	0.785581		0.105177	0.806753		0.588572	0.58558		0.243898	0.648674		0.154451	0.747775		0.283149	0.633264		0.101145	0.775293		0.526168	0.724488		0.210153	0.645355
0.306649	0.664295		0.592112	0.692405		0.351971	0.64571		0.574385	0.667228		0.0420058	0.740108		0.0166417	0.683026		0.482434	0.496777		0.569266	0.664668		0.104942	0.809269		0.0865685	0.778241		0.601619	0.536093		0.277481	0.616933		0.0845704	0.720309		0.253097	0.650079		0.122227	0.834636		0.550913	0.711647		0.300661	0.64262
0.360584	0.669759		0.763125	0.663277		0.272803	0.636867		0.568383	0.669955		0.311479	0.612803		0.02142	0.682996		0.495488	0.492765		0.138297	0.732836		0.0957978	0.805725		0.0900521	0.786745		0.550022	0.551081		0.505059	0.591514		0.163953	0.768257		0.541461	0.570764		0.144422	0.826134		0.556117	0.701405		0.288656	0.642814
0.363002	0.688697		0.35457	0.683379		0.285175	0.662671		0.547615	0.704102		0.331559	0.561384		0.0592978	0.61799		0.500395	0.472399		0.104091	0.723289		0.11676	0.732519		0.0640535	0.799973		0.525782	0.60081		0.485115	0.628091		0.136785	0.721753		0.730889	0.593494		0.137248	0.8293		0.54631	0.720391		0.227219	0.655031
0.393914	0.676688		0.264087	0.698659		0.31691	0.637584		0.553406	0.691964		0.118412	0.565813		0.00909094	0.715451		0.516369	0.469195		0.47518	0.721752		0.132236	0.754634		0.06722	0.833912		0.715955	0.530032		0.169035	0.62369		0.0546597	0.714969		0.513101	0.578859		0.142905	0.811544		0.595117	0.672782		0.209567	0.656939
0.41012	0.634282		0.281896	0.718205		0.326268	0.610434		0.533731	0.645855		0.0679417	0.697205		0.00780576	0.725433		0.511902	0.471264		0.569876	0.715324		0.106869	0.734506		0.0711114	0.805112		0.683729	0.537011		0.165014	0.675355		0.214438	0.750354		0.598606	0.543956		0.148133	0.819769		0.600401	0.683933		0.138265	0.644082
0.352383	0.672707		0.323587	0.724769		0.34637	0.622791		0.558371	0.651386		0.327584	0.575365		0.0370237	0.727312		0.543681	0.491535		0.103418	0.711522		0.12878	0.72618		0.181661	0.756525		0.450596	0.566161		0.0587078	0.764818		0.167157	0.736151		0.709236	0.58075		0.115024	0.769049		0.557072	0.695966		0.00401891	0.692183
0.39745	0.692316		0.307782	0.730436		0.218922	0.769109		0.508374	0.642066		0.307271	0.632199		0.044553	0.696755		0.489296	0.478016		0.313627	0.714111		0.0916082	0.747987		0.196922	0.802093		0.338576	0.544466		0.120842	0.734474		0.233448	0.724432		0.749116	0.539101		0.0556721	0.814134		0.551946	0.698477		0.0956371	0.683978
0.522389	0.611684		0.300894	0.717859		0.180389	0.79818		0.506518	0.627514		0.0711937	0.526765		0.043417	0.678483		0.481397	0.472307		0.641726	0.615923		0.106101	0.733233		0.164306	0.792471		0.450186	0.548191		0.243647	0.74831		0.437978	0.733634		0.754492	0.562053		0.110544	0.832224		0.505022	0.699597		0.0827568	0.705938
0.594186	0.569626		0.617042	0.671078		0.0111904	0.756452		0.500393	0.639355		0.00374036	0.663664		0.0484601	0.699955		0.464048	0.470236		0.478431	0.593818		0.11567	0.699902		0.108153	0.767088		0.408085	0.538884		0.124609	0.744511		0.136973	0.742784		0.360973	0.587052		0.124306	0.821651		0.512206	0.706456		0.0255716	0.672705
0.988956	0.426706		0.938319	0.675432		0.0978712	0.779086		0.525314	0.63912		0.0825778	0.617335		0.0918023	0.689945		0.428561	0.464054		0.122625	0.676822		0.145647	0.663862		0.0653165	0.758823		0.342881	0.548555		0.192529	0.732897		0.0683278	0.745111		0.702466	0.550278		0.101198	0.782252		0.514522	0.710713		0.0436845	0.680905
0.890096	0.504442		0.840728	0.650967		0.158031	0.720723		0.497132	0.642691		0.0103372	0.577951		0.0798416	0.736329		0.460207	0.484179		0.108127	0.680003		0.136331	0.687386		0.037873	0.777983		0.290149	0.604029		0.314283	0.684681		0.0901596	0.75907		0.536886	0.575653		0.0676753	0.79817		0.523615	0.693037		0.103191	0.674028
0.441282	0.645401		0.513061	0.63851		0.316734	0.666549		0.519671	0.638651		0.218137	0.565863		0.0677616	0.666965		0.615976	0.46631		0.233576	0.686694		0.11171	0.758275		0.0437083	0.763162		0.314853	0.588451		0.552435	0.617234		0.244595	0.721131		0.43843	0.573986		0.0218174	0.688528		0.524616	0.683771		0.0830759	0.69347
0.296846	0.648991		0.332082	0.702314		0.261412	0.685113		0.481189	0.649466		0.100328	0.509663		0.128953	0.591007		0.721613	0.507879		0.402438	0.660485		0.149668	0.718285		0.0468907	0.784059		0.224699	0.607639		0.205756	0.643558		0.135705	0.706235		0.357008	0.591033		0.105778	0.652659		0.504824	0.684448		0.040604	0.716294
0.280827	0.712537		0.291854	0.732133		0.152818	0.741546		0.476873	0.631346		0.285557	0.675556		0.275345	0.595368		0.658362	0.497437		0.162842	0.677704		0.151664	0.755883		0.0570713	0.792388		0.284458	0.561733		0.338557	0.639797		0.0556233	0.729495		0.395876	0.603412		0.0226693	0.696821		0.483927	0.684555		0.0974006	0.706505
0.263813	0.729257		0.307925	0.715309		0.214929	0.808281		0.475233	0.622906		0.00118718	0.504344		0.191971	0.645489		0.529068	0.496104		0.461031	0.653517		0.11221	0.76468		0.0650881	0.796018		0.459568	0.567461		0.393631	0.577337		0.0419831	0.740971		0.303958	0.647057		0.0358617	0.782139		0.474571	0.675309		0.0704131	0.724141
0.299856	0.693423		0.419124	0.696487		0.0796028	0.779966		0.471235	0.641084		0.311368	0.459886		0.0906814	0.742552		0.49869	0.468797		0.563135	0.641004		0.137281	0.745228		0.0584234	0.776805		0.713378	0.520299		0.228787	0.641193		0.0510949	0.730867		0.205746	0.643671		0.049669	0.787721		0.48401	0.676404		0.145586	0.643226
0.649229	0.616358		0.314322	0.727048		0.281235	0.700415		0.486835	0.630992		0.327446	0.567149		0.0264734	0.709016		0.538218	0.476187		0.192256	0.648712		0.139813	0.766008		0.0882015	0.756115		0.746293	0.567641		0.330195	0.608411		0.144003	0.777251		0.24261	0.606385		0.0206612	0.807815		0.497398	0.688054		0.107871	0.734084
0.476831	0.63855		0.549438	0.677739		0.347976	0.636294		0.49412	0.659401		0.267288	0.620518		0.0247981	0.634844		0.561074	0.464734		0.0695565	0.698564		0.135131	0.753598		0.0349484	0.765924		0.692365	0.52855		0.489248	0.581612		0.486561	0.696856		0.177957	0.652179		0.0305133	0.745273		0.545137	0.65078		0.103509	0.690042
0.305619	0.743217		0.517121	0.6411		0.290136	0.680118		0.45622	0.633807		0.293671	0.576477		0.0794087	0.651662		0.556519	0.451758		0.211536	0.714698		0.154858	0.726266		0.0257004	0.751786		0.699365	0.550876		0.168009	0.673439		0.427686	0.732436		0.184484	0.656085		0.0110576	0.767101		0.537154	0.691958		0.094043	0.712998
0.299909	0.704037		0.108185	0.828951		0.283505	0.786294		0.4004	0.747487		0.0113691	0.632175		0.0258489	0.776815		0.0031993	0.701289		0.263035	0.749048		0.17601	0.588988		0.0639747	0.809165		0.1984	0.677913		0.142981	0.695327		0.0080076	0.815071		0.128353	0.738007		0.008627	0.821692		0.413718	0.756452		0.240357	0.733489
0.180849	0.729794		0.113946	0.822879		0.152793	0.823297		0.457345	0.773514		0.223393	0.639463		0.0813976	0.773662		0.0448148	0.710697		0.153974	0.704369		0.162583	0.716565		0.0180081	0.828963		0.152632	0.671545		0.619048	0.627161		0.0077209	0.846473		0.125844	0.710313		0.0067946	0.87509		0.680657	0.810695		0.314392	0.739274
0.0768683	0.770816		0.00763212	0.801264		0.0590051	0.810239		0.389571	0.72129		0.0227337	0.720486		0.0616399	0.807787		0.100946	0.628615		0.0261243	0.728184		0.122876	0.723358		0.0365462	0.864679		0.206679	0.649653		0.184558	0.649772		0.0522503	0.769498		0.245531	0.674026		0.000498794	0.882658		0.659858	0.808641		0.297311	0.73898
0.0455774	0.741205		0.00979434	0.819101		0.114266	0.81671		0.408555	0.713729		0.00911124	0.716582		0.0463573	0.746966		0.0986349	0.643965		0.0244843	0.729702		0.0683913	0.728472		0.00613142	0.854417		0.154654	0.646089		0.590381	0.645975		0.0280995	0.837966		0.147218	0.698119		0.00906105	0.88147		0.583041	0.800212		0.194198	0.757321
0.0950407	0.739969		0.0839791	0.798276		0.070976	0.818892		0.269583	0.791542		0.0344289	0.766616		0.056415	0.820582		0.0699204	0.643674		0.0026339	0.773924		0.0369282	0.712525		0.0183297	0.888375		0.0951462	0.682879		0.316628	0.651104		0.0455339	0.869697		0.0349205	0.697768		0.0164568	0.896752		0.224927	0.796992		0.0373817	0.740602
0.0809718	0.72072		0.0536805	0.863205		0.137138	0.843893		0.0408602	0.855406		0.168066	0.667214		0.0123498	0.795254		0.241504	0.575523		0.0446772	0.773731		0.0515215	0.74356		0.010857	0.863992		0.174159	0.695092		0.0646098	0.686501		0.105185	0.849997		0.0489198	0.762747		0.00128791	0.8972		0.0139416	0.796256		0.285413	0.736199
0.146092	0.778108		0.0917522	0.882605		0.0382592	0.850402		0.0390706	0.874037		0.0306145	0.756273		0.0576062	0.797706		0.0758254	0.608049		0.0789283	0.745864		0.0255639	0.688756		0.00693559	0.908667		0.0349158	0.733327		0.0820996	0.675611		0.254892	0.824415		0.0839414	0.707201		0.00358756	0.90388		0.0329175	0.802888		0.277342	0.753026
0.0706154	0.772344		0.109174	0.833531		0.133229	0.830469		0.0515906	0.816946		0.114103	0.698697		0.0436591	0.819521		0.144835	0.738793		0.510712	0.726673		0.0134178	0.720871		0.00165195	0.880691		0.0622464	0.651588		0.0396291	0.722842		0.378928	0.83772		0.090666	0.74385		0.0019675	0.908102		0.0790701	0.791065		0.283682	0.7279
0.0161805	0.738497		0.0256632	0.860311		0.138143	0.692653		0.0630478	0.838597		0.112279	0.714205		0.00331098	0.74665		0.104976	0.694783		0.0609021	0.70499		0.0439909	0.785431		0.000481998	0.889218		0.166445	0.625999		0.0309399	0.690499		0.336177	0.79418		0.127419	0.666179		0.0291012	0.913748		0.0144924	0.810121		0.190485	0.783705
0.0713939	0.755456		0.10792	0.799491		0.235525	0.834238		0.0743301	0.843667		0.286206	0.653076		0.0234559	0.772234		0.0372931	0.676617		0.0246212	0.721132		0.021595	0.837002		0.0101058	0.900581		0.128893	0.674934		0.166125	0.718744		0.00303863	0.829066		0.147128	0.643437		0.0113894	0.927802		0.0527497	0.782361		0.111111	0.806968
0			0			0			0			0			0			0			0			0			0			0			0			0			0			0			0			0
0.00237621	0.747966		0.205757	0.80323		0.187025	0.754775		0.07029	0.845155		0.174838	0.678789		0.0210806	0.789696		0.133841	0.663556		0.0639073	0.703015		0.0413537	0.799676		0.0161812	0.873936		0.00857823	0.698454		0.0725553	0.70737		0.0127812	0.862969		0.0564591	0.731122		0.0180251	0.928519		0.0614306	0.778907		0.0248982	0.769102
0.11297	0.722264		0.0492191	0.81928		0.0647846	0.741986		0.0515579	0.827595		0.0942493	0.737814		0.0288522	0.800192		0.163412	0.571037		0.0690291	0.764254		0.0266489	0.782529		0.0383659	0.902938		0.271006	0.617852		0.00171467	0.638228		0.0617054	0.777372		0.0739447	0.709334		0.00429614	0.925436		0.0405742	0.768361		0.0585281	0.791233
0.046051	0.77619		0.141934	0.832399		0.174658	0.843821		0.0854429	0.836454		0.227926	0.705115		0.00550402	0.802997		0.063436	0.776285		0.0154585	0.761134		0.0865572	0.67208		0.0447862	0.888723		0.143776	0.671472		0.262167	0.641856		0.0463537	0.85812		0.0528279	0.742908		0.0101531	0.929669		0.64802	0.814864		0.0269171	0.796245
0.0528643	0.77572		0.035558	0.805461		0.12835	0.82406		0.0160582	0.777849		0.0265963	0.725656		0.00647473	0.795515		0.23867	0.53497		0.0366566	0.766683		0.0502033	0.834784		0.0215517	0.865879		0.0873649	0.654811		0.00638669	0.673811		0.0259757	0.827125		0.0697998	0.740417		0.00532697	0.934778		0.539014	0.826369		0.120895	0.795257
0.00562372	0.737004		0.0338105	0.788145		0.0678159	0.842117		0.0253311	0.803689		0.115193	0.735557		0.0111954	0.767403		0.144535	0.58577		0.00679251	0.779528		0.0122999	0.837529		0.0578775	0.890031		0.0292605	0.719875		0.133652	0.630616		0.0782709	0.858544		0.0276922	0.747871		0.00740442	0.921375		0.490129	0.8303		0.0924679	0.735147
0.0880848	0.758838		0.180488	0.818119		0.0771997	0.81698		0.0521506	0.820916		0.0398844	0.649217		0.0290307	0.823595		0.156232	0.611305		0.0125798	0.750703		0.00268982	0.818056		0.0533357	0.865723		0.196993	0.667862		0.0771932	0.615273		0.0831438	0.807563		0.166874	0.678234		0.0215597	0.922833		0.0924733	0.762618		0.0617567	0.801456
0.0661468	0.732308		0.292354	0.820256		0.248301	0.714957		0.044803	0.84505		0.0236304	0.655977		0.0148095	0.750271		0.1015	0.710012		0.246235	0.729033		0.00142499	0.806942		0.0342783	0.882193		0.132432	0.699788		0.487021	0.612101		0.10377	0.781948		0.098296	0.691395		0.00573695	0.922324		0.115275	0.730679		0.183939	0.740949
0.0439853	0.761735		0.0759939	0.829824		0.0719504	0.668347		0.240464	0.751844		0.0319899	0.707886		0.0453028	0.735176		0.0111371	0.697043		0.0482328	0.785587		0.0276153	0.854224		0.0323896	0.858363		0.154175	0.624094		0.0822803	0.682674		0.404431	0.834349		0.036186	0.649126		0.0181453	0.924169		0.024564	0.841745		0.19645	0.739495
0.0530804	0.734933		0.204358	0.789747		0.226003	0.836108		0.0251936	0.804697		0.132263	0.769036		0.0287833	0.779489		0.143522	0.623408		0.111754	0.754808		0.0246164	0.831678		0.0213869	0.903089		0.0289957	0.704463		0.0719232	0.705188		0.0604521	0.852041		0.183269	0.652353		0.0368783	0.926505		0.265755	0.792646		0.17105	0.751602
7.36623e-05	0.676936		0.279155	0.7733		0.0289773	0.824998		0.044796	0.795851		0.13587	0.68342		0.0231015	0.779867		0.0765601	0.662485		0.162986	0.719279		0.0396337	0.812661		0.0199666	0.849653		0.226939	0.661332		0.0226674	0.703567		0.0304985	0.853206			0.69662		0.0198058	0.922645		0.0544588	0.789303		0.193033	0.700753
0.00287852	0.71301		0.122782	0.731715		0.0252771	0.801872		0.0442815	0.826531		0.0771997	0.801091		0.0694779	0.768141		0.183735	0.543733		0.328719	0.691046		0.0370702	0.746358		0.00430716	0.853032		0.162425	0.705624		0.116328	0.688836		0.0489058	0.807316		0.00111044	0.655544		0.0085319	0.932347		0.0728197	0.793909		0.208411	0.710667
0.0686192	0.729951		0.00670503	0.734823		0.0987609	0.806318		0.024041	0.824546		0.133772	0.732107		0.0341925	0.790371		0.168824	0.557608		0.0913782	0.733361		0.0074686	0.784816		0.0388097	0.762592		0.211971	0.624473		0.309973	0.641811		0.02454	0.857923		0.181083	0.72712		0.0259684	0.917635		0.109934	0.793469		0.212174	0.727401
0.0586345	0.747341		0.00937262	0.826932		0.00578864	0.849145		0.021601	0.859866		0.0788996	0.656115		0.0598487	0.802871		0.000797113	0.715491		0.0637679	0.690695		0.00364222	0.794205		0.0871115	0.802683		0.00325383	0.696012		0.16941	0.686738		0.242696	0.836045			0.668156		0.00815013	0.917963		0.227356	0.742264		0.196169	0.701915
0.021791	0.671555		0.129413	0.835537		0.247382	0.670431		0.03859	0.792815		0.0645443	0.760974		0.0130282	0.762508		0.146304	0.577385		0.055028	0.754194		0.0595086	0.836236		0.0959233	0.841635		0.179036	0.610855		0.584538	0.614273		0.132828	0.828026		0.0350426	0.74365		0.0230949	0.91093		0.100714	0.827705		0.172673	0.704268
0.0359985	0.754983		0.0472257	0.837745		0.260858	0.641872		0.0749339	0.812077		0.0697144	0.707333		0.0080442	0.765485		0.344183	0.514094		0.0376664	0.764968		0.0634369	0.825155		0.0767695	0.847932		0.0900039	0.710771		0.0913613	0.670042		0.0426474	0.79776		0.229362	0.660923		0.0397532	0.906531		0.108	0.787926		0.223045	0.687971
0.0299201	0.740867		0.422735	0.796182		0.263134	0.579343		0.0636558	0.821121		0.286574	0.702967		0.0138943	0.733937		0.0495394	0.704237		0.0820693	0.715024		0.071641	0.787749		0.100758	0.819467		0.11204	0.692574		0.060738	0.613762		0.0367452	0.842124		0.127361	0.669906		0.0100761	0.920408		0.119749	0.779345		0.175605	0.723281
0.998953	0.552542		0.891856	0.780969		0.24386	0.673971		0.0316171	0.862086		0.0243045	0.682279		0.012489	0.755869		0.109036	0.652911		0.424989	0.725655		0.0154565	0.815065		0.062424	0.784021		0.178163	0.698445		0.0605203	0.678686		0.000344137	0.823487		0.399017	0.702773		0.0118338	0.910576		0.198443	0.778254		0.143394	0.706678
0.939635	0.557082		0.800676	0.796734		0.234657	0.641958		0.0521749	0.815644		0.194821	0.70984		0.0663367	0.772746		0.237743	0.494294		0.0227437	0.70997		0.0156815	0.824541		0.0378416	0.816088		0.0588217	0.72451		0.00893618	0.650141		0.0724124	0.756504		0.169798	0.768966		0.0258107	0.918243		0.0821669	0.729574		0.118454	0.709365
0.625259	0.654406		0.586656	0.770658		0.247258	0.663991		0.0827129	0.765728		0.0332032	0.667749		0.0113325	0.777394		0.144673	0.670726		0.0460681	0.721393		0.0493446	0.82834		0.0265485	0.840613		0.317745	0.589732		0.0433684	0.691968		0.0502693	0.831998		0.323284	0.714061		0.0304317	0.901944		0.0613329	0.696632		0.168793	0.714819
0.805401	0.594841		0.614992	0.699856		0.347285	0.595498		0.529344	0.723624		0.0749694	0.665113		0.196044	0.744668		0.745248	0.478574		0.219469	0.736145		0.0988908	0.636698		0.0814391	0.710067		0.980678	0.559025		0.0539471	0.677164		0.765458	0.757213		1.06884	0.555363		0.0936567	0.774519		0.203757	0.663651		0.27082	0.655773
0.703571	0.594767		0.926848	0.73209		0.399836	0.681509		0.681603	0.693042		0.054153	0.589951		0.177029	0.777845		0.658715	0.503204		0.784196	0.678682		0.0602324	0.671276		0.0970398	0.805228		0.951264	0.557197		0.0593866	0.649052		0.373384	0.800098		1.09639	0.592902		0.0945601	0.762558		0.625965	0.730146		0.293769	0.67835
0.421018	0.654648		0.849917	0.727975		0.265706	0.719005		0.579758	0.703638		0.195822	0.586681		0.128103	0.756337		0.5712	0.506215		0.249949	0.731031		0.167429	0.577486		0.104318	0.810223		0.926628	0.537487		0.179167	0.671651		0.302028	0.771583		1.0136	0.544141		0.114889	0.760509		0.537993	0.733731		0.296234	0.695241
0.424223	0.67268		0.56515	0.726905		0.0362241	0.745776		0.373019	0.722747		0.0783402	0.637193		0.114388	0.755733		0.510163	0.461709		0.156233	0.744813		0.0929526	0.607591		0.119237	0.835642		0.917853	0.544804		0.0423739	0.677379		0.174482	0.801441		0.987671	0.546102		0.145843	0.775279		0.53518	0.726753		0.293088	0.681073
0.53461	0.652187		0.215139	0.728753		0.0900005	0.669347		0.412587	0.685353		0.151358	0.647544		0.136671	0.762132		0.534376	0.466033		0.332234	0.70591		0.120645	0.651858		0.128926	0.785299		0.928083	0.525719		0.121581	0.715678		0.19397	0.785134		0.719322	0.476049		0.137528	0.745132		0.500624	0.743792		0.301635	0.704724
0.43205	0.67857		0.207997	0.772253		0.109926	0.58663		0.408551	0.703833		0.125236	0.695084		0.0534705	0.701192		0.537159	0.458212		0.523508	0.683643		0.277437	0.69441		0.103089	0.78076		0.750949	0.560567		0.215919	0.652522		0.121655	0.741934		1.13147	0.587092		0.0858959	0.779675		0.421273	0.723635		0.298175	0.697992
0.41498	0.688634		0.302351	0.744797		0.135033	0.511505		0.656929	0.686176		0.0292551	0.547079		0.146753	0.761872		0.516786	0.456758		0.498406	0.678356		0.244783	0.752545		0.112776	0.820874		0.920619	0.565919		0.00396511	0.700681		0.166189	0.793856		1.10512	0.598913		0.0555416	0.80913		0.440186	0.712921		0.297972	0.700448
0.392944	0.667372		0.219297	0.741792		0.105858	0.638235		0.588618	0.717311		0.0853436	0.686873		0.0765265	0.710287		0.52332	0.453034		0.669204	0.678861		0.165641	0.788884		0.131029	0.839051		0.631645	0.555721		0.113373	0.661439		0.33088	0.776405		0.681515	0.516005		0.0784732	0.796695		0.433158	0.739704		0.208096	0.77672
0.666387	0.615816		0.241249	0.744669		0.0325481	0.597865		0.517364	0.715865		0.183292	0.622268		0.0435523	0.681311		0.52134	0.457623		0.232791	0.738241		0.130793	0.777629		0.135337	0.837745		0.902251	0.508019		0.381783	0.617966		0.332232	0.783759		0.781749	0.54983		0.118728	0.801609		0.334107	0.710912		0.225818	0.714594
0.630431	0.602263		0.198299	0.725751		0.402528	0.712027		0.499503	0.716606		0.0497655	0.689236		0.0457835	0.758663		0.533136	0.473249		0.214466	0.71322		0.0812601	0.774525		0.111791	0.803866		0.596685	0.546346		0.0149691	0.63769		0.109561	0.790116		0.504904	0.542582		0.113084	0.769529		0.445158	0.752099		0.284303	0.656227
0.438278	0.613625		0.201288	0.762634		0.215707	0.7499		0.498635	0.72017		0.00330955	0.601647		0.0808171	0.670219		0.525499	0.457533		0.41651	0.706464		0.0525532	0.756929		0.115283	0.804645		0.717465	0.560371		0.0777734	0.654007		0.157489	0.786021		0.430277	0.56017		0.089756	0.768144		0.473418	0.738139		0.321264	0.643156
0.378043	0.697512		0.484192	0.740397		0.116446	0.652634		0.500055	0.679636		0.328211	0.580826		0.0400976	0.740121		0.445141	0.47759		0.593887	0.691996		0.126537	0.804382		0.0966744	0.776781		0.730512	0.499586		0.111357	0.617136		0.087609	0.784699		0.400225	0.576844		0.110837	0.812827		0.498163	0.736486		0.411773	0.66861
0.431978	0.676313		0.655205	0.714877		0.037278	0.618321		0.494053	0.706476		0.0252728	0.69342		0.0448759	0.692562		0.458195	0.455403		0.162918	0.717753		0.117393	0.782745		0.100158	0.791285		0.678915	0.511374		0.338934	0.666398		0.166992	0.788198		0.688589	0.594388		0.133033	0.809336		0.503368	0.730312		0.399767	0.649335
0.434396	0.620367		0.24665	0.714527		0.0496499	0.651585		0.473285	0.711067		0.045353	0.694718		0.0358418	0.650976		0.463102	0.445463		0.128713	0.734393		0.138355	0.751382		0.0741593	0.813781		0.654675	0.532513		0.31899	0.623632		0.139823	0.77375		0.878017	0.58993		0.125859	0.814127		0.49356	0.741949		0.33833	0.658406
0.465308	0.625337		0.156167	0.741376		0.0813852	0.642411		0.479076	0.71965		0.167794	0.582687		0.0325469	0.748354		0.479076	0.454726		0.499801	0.702873		0.153831	0.715413		0.0773259	0.847908		0.844848	0.489009		0.00291045	0.614901		0.0576983	0.753932		0.660229	0.572869		0.131516	0.80294		0.542367	0.710158		0.320678	0.653776
0.481514	0.640513		0.173976	0.75977		0.090743	0.572809		0.459401	0.672654		0.218264	0.621582		0.0312617	0.738095		0.474609	0.449629		0.594497	0.711005		0.128464	0.71902		0.0812173	0.797028		0.812622	0.460361		0.331139	0.629661		0.217476	0.794645		0.745734	0.536997		0.136743	0.805382		0.547652	0.724498		0.249376	0.654006
0.423776	0.620722		0.215667	0.750975		0.110845	0.595093		0.484041	0.667579		0.0413788	0.679576		0.0604797	0.771661		0.506388	0.472363		0.128039	0.737793		0.150375	0.728643		0.191767	0.775334		0.57949	0.508257		0.224832	0.693697		0.170195	0.74829		0.856363	0.549757		0.103635	0.757564		0.504322	0.731308		0.107092	0.669078
0.468844	0.648785		0.199862	0.779543		0.454447	0.696465		0.434044	0.650062		0.0210658	0.68669		0.0210971	0.699397		0.452003	0.461767		0.338248	0.694604		0.113203	0.73475		0.207028	0.800892		0.467469	0.501089		0.0452829	0.720355		0.236487	0.77097		0.896244	0.534949		0.0442828	0.800343		0.499196	0.734974		0.206748	0.682397
0.593783	0.609296		0.192974	0.773182		0.415914	0.707911		0.432188	0.646958		0.215012	0.56198		0.0668729	0.732905		0.444104	0.46322		0.666347	0.592388		0.127696	0.741064		0.174412	0.785701		0.579079	0.502596		0.0775224	0.692269		0.441017	0.776217		0.90162	0.563666		0.0991542	0.832611		0.452272	0.736348		0.193868	0.692045
0.66558	0.544185		0.509122	0.736493		0.224335	0.714884		0.426063	0.64185		0.282465	0.616652		0.071916	0.72211		0.426755	0.467652		0.503052	0.594541		0.137265	0.696948		0.118259	0.80091		0.536978	0.491228		0.0415161	0.700074		0.140011	0.797655		0.508101	0.49049		0.112917	0.822046		0.459457	0.718987		0.136683	0.699739
1.06035	0.413726		0.830399	0.723423		0.137654	0.778902		0.450984	0.637245		0.203628	0.603898		0.0683463	0.690415		0.391268	0.460108		0.147246	0.665687		0.167242	0.681218		0.0754223	0.750841		0.471775	0.516434		0.0264042	0.702762		0.0713664	0.799654		0.849594	0.551268		0.0898084	0.772879		0.461773	0.735101		0.154796	0.724856
0.96149	0.507802		0.732808	0.704598		0.0774942	0.721531		0.422801	0.662599		0.275868	0.608232		0.103298	0.724473		0.422914	0.449755		0.132749	0.653721		0.157926	0.677181		0.0479788	0.782396		0.419043	0.547966		0.148158	0.633283		0.0931982	0.744196		0.684014	0.531561		0.056286	0.795242		0.470865	0.703114		0.214302	0.690436
0.512676	0.621295		0.405141	0.673828		0.0812089	0.674479		0.445341	0.658522		0.0680687	0.690896		0.0443057	0.683319		0.578683	0.456235		0.258198	0.691979		0.133305	0.757178		0.0538141	0.767483		0.443747	0.503537		0.386311	0.656856		0.247634	0.792799		0.585558	0.573464		0.010428	0.695156		0.471866	0.713512		0.194187	0.706171
0.36824	0.649956		0.224162	0.74814		0.0258875	0.719288		0.406859	0.654975		0.185878	0.531667		0.105497	0.63706		0.68432	0.483301		0.427059	0.644928		0.171263	0.728025		0.0569965	0.767457		0.353592	0.559024		0.0396313	0.601881		0.138744	0.728357		0.504136	0.512059		0.117168	0.645982		0.452075	0.724549		0.151715	0.732964
0.352221	0.644856		0.183934	0.752557		0.388342	0.652821		0.402543	0.643484		0.571763	0.574903		0.251889	0.626398		0.621069	0.477017		0.187463	0.661515		0.173259	0.75872		0.0671772	0.785762		0.413351	0.536262		0.172432	0.652663		0.058662	0.761927		0.543003	0.542024		0.0112799	0.69331		0.431177	0.709884		0.208512	0.70958
0.335207	0.704769		0.200005	0.752147		0.450454	0.714209		0.400903	0.630661		0.285018	0.530866		0.168515	0.687663		0.491775	0.481823		0.485652	0.632374		0.133805	0.769866		0.0751939	0.807715		0.588461	0.511265		0.227506	0.636044		0.0450217	0.792077		0.451086	0.581066		0.0244724	0.77722		0.421822	0.715786		0.181524	0.697163
0.37125	0.652116		0.311204	0.739699		0.155922	0.771429		0.396904	0.661001		0.0251623	0.599584		0.114137	0.731955		0.461397	0.484904		0.587756	0.638635		0.158876	0.740552		0.0685293	0.770212		0.842271	0.475306		0.0626622	0.61349		0.0541335	0.756217		0.352874	0.563712		0.0382796	0.776976		0.43126	0.704543		0.256697	0.657331
0.720623	0.572084		0.206402	0.747236		0.0457096	0.72492		0.412504	0.652647		0.0412406	0.678856		0.0499294	0.712383		0.500925	0.431093		0.216877	0.666992		0.161408	0.76552		0.0983074	0.747041		0.875186	0.500662		0.16407	0.613118		0.147042	0.801717		0.389738	0.557801		0.00927186	0.795775		0.444649	0.710228		0.218982	0.75084
0.548225	0.564293		0.441518	0.755445		0.112451	0.652473		0.41979	0.668982		0.0189182	0.655968		0.00134219	0.715842		0.523781	0.443468		0.0941777	0.718578		0.156726	0.761967		0.0248426	0.764156		0.821258	0.502847		0.323124	0.59055		0.4896	0.756645		0.325085	0.589672		0.0191239	0.749944		0.492387	0.699136		0.21462	0.692555
0.377013	0.67145		0.409201	0.707893		0.0546111	0.663393		0.38189	0.638778		0.00746499	0.686131		0.0559527	0.699907		0.519226	0.420605		0.236158	0.679774		0.176453	0.750199		0.0155946	0.745304		0.828258	0.511288		0.0018844	0.629891		0.430725	0.751962		0.331612	0.566603		0.000331758	0.761035		0.484404	0.720564		0.205154	0.689912
0.297533	0.735466		0.0975728	0.875455		0.47053	0.669368		0.47069	0.723235		0.163469	0.720453		0.0469295	0.821131		0.13704	0.648375		0.326943	0.662327		0.217363	0.522169		0.0801559	0.77265		0.206978	0.615454		0.215536	0.722504		0.00477359	0.824537		0.0718942	0.762263		0.0266521	0.846462		0.475149	0.759977		0.265255	0.747834
0.178473	0.75601		0.0918118	0.813433		0.339818	0.680881		0.527635	0.728854		0.0485544	0.695543		0.102478	0.824216		0.0890263	0.640528		0.217882	0.631848		0.203937	0.679495		0.0341892	0.788037		0.16121	0.614599		0.691603	0.662819		0.00506029	0.885249		0.069385	0.707204		0.0248197	0.900914		0.742088	0.774313		0.33929	0.758448
0.0744921	0.767488		0.198125	0.77546		0.12802	0.687915		0.459861	0.681475		0.152104	0.619358		0.0827204	0.832423		0.0328948	0.631808		0.0900316	0.679707		0.16423	0.685229		0.0527274	0.801181		0.215257	0.636983		0.257113	0.697491		0.0394691	0.791984		0.189072	0.672772		0.0175263	0.904276		0.721289	0.781768		0.322209	0.740904
0.0432012	0.762436		0.195963	0.799563		0.301291	0.684265		0.478845	0.697982		0.183949	0.603374		0.0252767	0.777492		0.0352061	0.614018		0.0883916	0.663663		0.109745	0.691421		0.0223126	0.820357		0.163232	0.650624		0.662937	0.683477		0.0153183	0.830058		0.0907584	0.688759		0.0270861	0.890194		0.644472	0.756676		0.219096	0.751286
0.0926645	0.741476		0.289737	0.766114		0.258001	0.732927		0.339874	0.762529		0.209267	0.639754		0.0774956	0.832512		0.0639206	0.637482		0.0612734	0.647187		0.0782818	0.733345		0.00214848	0.851466		0.103724	0.684741		0.389183	0.653254		0.0327527	0.86285		0.0215386	0.663479		0.0344819	0.919269		0.286358	0.762223		0.0622798	0.798732
0.0785956	0.71709		0.259438	0.779123		0.324163	0.70375		0.11115	0.805647		0.00677206	0.626114		0.00873078	0.784145		0.107663	0.602624		0.0192302	0.668157		0.0928752	0.721306		0.00532412	0.81808		0.182737	0.670447		0.137165	0.689457		0.0924037	0.865541		0.00753927	0.761497		0.0167372	0.911258		0.0753722	0.754087		0.310311	0.757091
0.143716	0.745349		0.114005	0.814699		0.148766	0.708858		0.0312195	0.818602		0.144224	0.688053		0.0786868	0.831399		0.0580156	0.602359		0.142836	0.666427		0.0669175	0.655669		0.0231168	0.865977		0.043494	0.695454		0.154655	0.714784		0.242111	0.812417		0.0274823	0.679311		0.0144375	0.917869		0.028513	0.7876		0.30224	0.754805
0.0682392	0.748303		0.0965837	0.832866		0.320254	0.723142		0.0186994	0.80128		0.288941	0.651368		0.0647397	0.837622		0.278676	0.675773		0.574619	0.652074		0.0547715	0.766523		0.0145292	0.828783		0.0536682	0.656476		0.112184	0.739353		0.366146	0.815854		0.0342069	0.744084		0.0199926	0.924329		0.140501	0.767562		0.308581	0.748192
0.0138043	0.756477		0.231421	0.791464		0.048882	0.667274		0.00724226	0.842556		0.287117	0.603314		0.0243916	0.81163		0.238817	0.637125		0.124809	0.698383		0.00263729	0.739539		0.0166632	0.830541		0.175023	0.6527		0.0416155	0.726031		0.323396	0.816352		0.0709604	0.692082		0.0471263	0.931006		0.075923	0.819917		0.215383	0.758828
0.0690177	0.764522		0.313677	0.791231		0.42255	0.691579		0.00404006	0.843546		0.111368	0.677653		0.0445365	0.823797		0.0965479	0.671927		0.0885286	0.655348		0.0629486	0.783828		0.026287	0.812294		0.137471	0.683054		0.23868	0.739001		0.00974256	0.815317		0.0906688	0.686564		0.00663572	0.940762		0.00868083	0.766523		0.136009	0.728589
0.00237621	0.747966		0.205757	0.80323		0.187025	0.754775		0.07029	0.845155		0.174838	0.678789		0.0210806	0.789696		0.133841	0.663556		0.0639073	0.703015		0.0413537	0.799676		0.0161812	0.873936		0.00857823	0.698454		0.0725553	0.70737		0.0127812	0.862969		0.0564591	0.731122		0.0180251	0.928519		0.0614306	0.778907		0.0248982	0.769102
0			0			0			0			0			0			0			0			0			0			0			0			0			0			0			0			0
0.110594	0.803709		0.156538	0.869051		0.25181	0.695451		0.0187321	0.84579		0.0805888	0.647248		0.0499328	0.807023		0.0295712	0.603855		0.00512178	0.711769		0.0147047	0.780869		0.0221847	0.88219		0.279584	0.667276		0.07427	0.733133		0.0744866	0.790286		0.0174856	0.682321		0.013729	0.956848		0.0208564	0.76267		0.0834263	0.817547
0.0436748	0.732995		0.0638237	0.822219		0.361683	0.704929		0.155733	0.778427		0.0530874	0.811858		0.0265846	0.786271		0.0704051	0.690402		0.0484488	0.674086		0.0452036	0.615143		0.028605	0.837994		0.152354	0.676147		0.189611	0.755212		0.0335725	0.843618		0.00363119	0.687005		0.0281782	0.945098		0.709451	0.780634		0.00201889	0.844661
0.0504881	0.739851		0.241315	0.817718		0.315375	0.696276		0.0542318	0.792494		0.148242	0.646547		0.0146059	0.811928		0.104829	0.611214		0.100564	0.678795		0.0915569	0.74932		0.00537048	0.841452		0.0959432	0.72772		0.0661686	0.778466		0.0131945	0.836467		0.0133407	0.749814		0.0233521	0.947376		0.600444	0.803781		0.145793	0.769793
0.00324751	0.742355		0.171947	0.815786		0.254841	0.681428		0.0449589	0.784241		0.290031	0.608633		0.00988517	0.808859		0.0106944	0.628247		0.0571148	0.712394		0.0290537	0.821115		0.0416963	0.840697		0.0378387	0.696757		0.0610964	0.726627		0.0654897	0.860376		0.0287668	0.712383		0.0254295	0.950542		0.551559	0.808975		0.117366	0.79779
0.0857086	0.738779		0.386245	0.772627		0.109825	0.71499		0.0181394	0.850377		0.214723	0.57813		0.0501113	0.81895		0.0223909	0.616135		0.0764871	0.6274		0.0386638	0.841393		0.0371546	0.806114		0.205571	0.644217		0.00463789	0.700332		0.0703626	0.838631		0.110415	0.708734		0.0395848	0.93877		0.153904	0.742914		0.0866549	0.771906
0.0637706	0.733993		0.086597	0.886234		0.0612763	0.717225		0.025487	0.823174		0.198468	0.590323		0.0358901	0.788563		0.235341	0.647446		0.310143	0.659177		0.0427786	0.763898		0.0180971	0.834656		0.14101	0.664902		0.559577	0.650279		0.0909891	0.813182		0.0418369	0.723449		0.023762	0.934317		0.176706	0.702902		0.208837	0.765729
0.0416091	0.737224		0.129764	0.859334		0.115075	0.664914		0.310754	0.718424		0.206828	0.589097		0.0242222	0.747039		0.122704	0.632457		0.11214	0.71254		0.0137384	0.818581		0.0162084	0.8061		0.162753	0.698698		0.154836	0.694486		0.39165	0.850452		0.0202731	0.652884		0.0361704	0.939193		0.0859945	0.760576		0.221348	0.743582
0.0507042	0.699511		0.00139907	0.805831		0.413029	0.689844		0.0954836	0.751213		0.307101	0.666161		0.00770271	0.763398		0.00968086	0.681629		0.175661	0.646799		0.0167373	0.812468		0.00520569	0.863182		0.0204174	0.732019		0.144479	0.755771		0.0476709	0.846669		0.12681	0.680018		0.0549034	0.928463		0.327185	0.77869		0.195948	0.744272
0.00230255	0.677128		0.0733973	0.801546		0.158048	0.702298		0.115086	0.776843		0.310708	0.596607		0.00202088	0.76633		0.0572809	0.631033		0.226893	0.633642		0.00171995	0.782212		0.0361478	0.808489		0.235517	0.65663		0.0498879	0.732588		0.0432797	0.839559			0.742543		0.0378309	0.936416		0.00697172	0.778056		0.217931	0.747584
0.000502313	0.727034		0.0829751	0.791046		0.161748	0.677869		0.0260086	0.801227		0.252038	0.619403		0.0483973	0.757853		0.0498938	0.648284		0.392626	0.644739		0.0784238	0.770424		0.011874	0.813153		0.171004	0.669005		0.0437728	0.71739		0.061687	0.835737		0.0575695	0.711116		0.026557	0.93962		0.0113891	0.767149		0.233309	0.706681
0.0709954	0.749346		0.212462	0.734392		0.285786	0.686128		0.0462491	0.795066		0.30861	0.636484		0.0552731	0.794079		0.0349828	0.645391		0.155286	0.639041		0.0338851	0.7481		0.0226285	0.756541		0.220549	0.707938		0.237417	0.689487		0.0117588	0.888403		0.124623	0.666209		0.0439935	0.935471		0.048503	0.751915		0.237072	0.73409
0.0610107	0.717251		0.21513	0.786944		0.192814	0.736336		0.0918911	0.819443		0.0959386	0.60853		0.0809293	0.817412		0.134638	0.622165		0.000139427	0.667572		0.0449959	0.730204		0.0709304	0.766003		0.0053244	0.711447		0.241966	0.720454		0.229915	0.852303			0.69363		0.0261752	0.938336		0.288786	0.773293		0.221067	0.728896
0.0194148	0.731431		0.33517	0.743013		0.060357	0.68959		0.0317	0.796694		0.110294	0.767807		0.0341088	0.784322		0.0124633	0.640752		0.00887937	0.708449		0.018155	0.812044		0.0797421	0.793948		0.187615	0.596408		0.657094	0.64665		0.120047	0.851454		0.0214165	0.662792		0.04112	0.930492		0.162145	0.758006		0.197571	0.726294
0.0336223	0.743403		0.158532	0.776467		0.073833	0.659323		0.00464384	0.803083		0.105124	0.613852		0.0130364	0.775295		0.210342	0.593856		0.101574	0.710696		0.0220833	0.789459		0.0605883	0.782956		0.0985821	0.705115		0.163917	0.722768		0.0554286	0.850609		0.172903	0.63721		0.0577783	0.924026		0.0465696	0.761575		0.247943	0.715457
0.0322963	0.742944		0.216977	0.860878		0.0761091	0.583178		0.0066342	0.830804		0.111735	0.666076		0.00718629	0.735204		0.18338	0.623376		0.018162	0.670655		0.0302873	0.808698		0.0845772	0.782126		0.120618	0.70559		0.133293	0.704116		0.0495264	0.838812		0.18382	0.697488		0.0281012	0.933392		0.0583185	0.743202		0.200503	0.733561
0.996577	0.55528		0.686098	0.84745		0.0568351	0.69053		0.0386729	0.83811		0.199143	0.590284		0.0335696	0.793731		0.0248049	0.647246		0.488896	0.640214		0.0258971	0.767672		0.0462428	0.76045		0.186741	0.622692		0.133076	0.767472		0.0124371	0.834576		0.342558	0.645544		0.0298589	0.916522		0.259874	0.748741		0.168292	0.722827
0.937259	0.56615		0.594918	0.824015		0.047632	0.616112		0.0181151	0.817599		0.0199829	0.637868		0.0874173	0.791086		0.103902	0.580963		0.086651	0.705787		0.0256722	0.789279		0.0216604	0.78394		0.0502434	0.743161		0.0636191	0.743071		0.0851936	0.788503		0.113339	0.700879		0.0438358	0.927011		0.0207363	0.725161		0.143352	0.662266
0.622883	0.661838		0.380899	0.826346		0.0602324	0.681929		0.153003	0.726251		0.208041	0.61394		0.0324131	0.742977		0.278514	0.619538		0.109975	0.677391		0.00799097	0.804478		0.0103674	0.798921		0.326324	0.65637		0.115924	0.762137		0.0374881	0.856791		0.266825	0.70586		0.0484568	0.918704		9.76122e-05	0.740238		0.193691	0.739141
0.803025	0.632543		0.409235	0.746284		0.53431	0.539605		0.599634	0.692818		0.249808	0.610241		0.217125	0.768276		0.879089	0.521093		0.283377	0.666268		0.140244	0.592609		0.0976203	0.694934		0.989256	0.601852		0.126502	0.725381		0.752676	0.725735		1.01238	0.54366		0.111682	0.789733		0.265188	0.634386		0.295718	0.692831
0.701195	0.63536		0.72109	0.770715		0.586861	0.544881		0.751893	0.649721		0.228991	0.601107		0.198109	0.795397		0.792556	0.522507		0.848103	0.638139		0.0188788	0.632317		0.113221	0.758631		0.959843	0.599194		0.0131688	0.752007		0.360603	0.805606		1.03993	0.597313		0.112585	0.794517		0.687395	0.701967		0.318667	0.705894
0.418642	0.678811		0.64416	0.76888		0.452731	0.584518		0.650048	0.657034		0.0209843	0.525881		0.149184	0.780309		0.705041	0.51281		0.313856	0.659028		0.126076	0.609949		0.120499	0.761611		0.935206	0.598766		0.106612	0.743731		0.289247	0.776708		0.957138	0.554812		0.132915	0.762394		0.599424	0.709849		0.321132	0.704124
0.421847	0.690927		0.359393	0.794363		0.223249	0.59904		0.443309	0.677034		0.0964979	0.572914		0.135468	0.744339		0.644004	0.499022		0.22014	0.681492		0.051599	0.59605		0.135418	0.794002		0.926431	0.587871		0.0301814	0.742763		0.161701	0.777153		0.931212	0.532665		0.163868	0.776687		0.596611	0.706525		0.317986	0.688006
0.532234	0.647478		0.00938151	0.80568		0.0970247	0.655251		0.482877	0.667967		0.0234801	0.526537		0.157752	0.760591		0.668217	0.503771		0.396141	0.642945		0.161998	0.689736		0.145107	0.739572		0.936662	0.571825		0.0490252	0.738293		0.181189	0.772717		0.662863	0.494094		0.155553	0.756638		0.562055	0.719167		0.326533	0.717042
0.429673	0.680322		0.00223914	0.822094		0.0770991	0.568852		0.478841	0.678824		0.300074	0.617073		0.0745511	0.712611		0.671	0.485993		0.587416	0.637993		0.318791	0.62841		0.11927	0.746045		0.759527	0.532218		0.143364	0.722446		0.108874	0.756993		1.07501	0.582008		0.103921	0.803904		0.482703	0.702194		0.323073	0.714181
0.412604	0.692977		0.0965932	0.796553		0.0519918	0.533612		0.727219	0.642039		0.204093	0.503583		0.167834	0.795416		0.650627	0.479747		0.562313	0.61358		0.286137	0.725482		0.128957	0.797402		0.929198	0.56218		0.0765204	0.722987		0.153408	0.779926		1.04866	0.599469		0.0735667	0.823937		0.501616	0.680933		0.32287	0.73517
0.390568	0.712565		0.0135394	0.768294		0.0811676	0.582902		0.658908	0.67883		0.0894945	0.634652		0.0976071	0.703068		0.657161	0.48149		0.733111	0.630552		0.206995	0.760318		0.14721	0.799745		0.640223	0.590785		0.0408177	0.693083		0.318099	0.794769		0.625056	0.532105		0.0964983	0.8176		0.494589	0.723425		0.232994	0.726936
0.664011	0.63336		0.0354911	0.77821		0.154477	0.528819		0.587654	0.674077		0.00845346	0.731222		0.0646329	0.743286		0.655181	0.482959		0.296699	0.694544		0.172147	0.740574		0.151518	0.809107		0.910829	0.575921		0.309228	0.670451		0.31945	0.777525		0.72529	0.568547		0.136753	0.817227		0.395537	0.684988		0.250716	0.713531
0.628055	0.630338		0.00745804	0.751324		0.589553	0.559728		0.569793	0.672285		0.224604	0.574059		0.0247029	0.677284		0.666977	0.491749		0.278373	0.657576		0.122614	0.75485		0.127973	0.742743		0.605263	0.52781		0.0575862	0.690148		0.0967803	0.786756		0.448445	0.564388		0.131109	0.795275		0.506589	0.725135		0.309201	0.69252
0.435902	0.647394		0.00446948	0.7655		0.402732	0.629744		0.568925	0.681697		0.178148	0.474407		0.0597365	0.665841		0.65934	0.480092		0.480418	0.618187		0.0939069	0.753447		0.131464	0.765015		0.726043	0.571952		0.00521811	0.673418		0.144708	0.808532		0.373818	0.588875		0.107781	0.759566		0.534849	0.706518		0.346162	0.671653
0.375667	0.682265		0.278435	0.722942		0.070579	0.587049		0.570345	0.654374		0.153373	0.53895		0.0611782	0.728948		0.578982	0.481249		0.657794	0.627413		0.167891	0.781173		0.112856	0.764154		0.739091	0.512126		0.0388015	0.713538		0.0748279	0.762318		0.343766	0.590215		0.128863	0.82021		0.559594	0.710053		0.436671	0.676852
0.429602	0.666731		0.449447	0.776426		0.149747	0.566497		0.564343	0.655879		0.200111	0.541031		0.0659565	0.730535		0.592036	0.46858		0.226826	0.654222		0.158746	0.736157		0.116339	0.770163		0.687493	0.526095		0.266379	0.72219		0.154211	0.792625		0.63213	0.62005		0.151058	0.816779		0.564798	0.699668		0.424665	0.676108
0.432019	0.651756		0.0408928	0.776475		0.137375	0.635673		0.543575	0.681192		0.220191	0.575393		0.0147612	0.66775		0.596943	0.464093		0.19262	0.661742		0.179709	0.702468		0.0903405	0.781167		0.663253	0.566841		0.246435	0.723056		0.127042	0.783301		0.821558	0.604134		0.143884	0.827988		0.554991	0.710033		0.363228	0.678493
0.462932	0.64544		0.0495901	0.766378		0.10564	0.643883		0.549366	0.680972		0.00704405	0.666524		0.0536275	0.716907		0.612917	0.458649		0.563708	0.638572		0.195184	0.678331		0.093507	0.812322		0.853427	0.548763		0.0696449	0.687516		0.0449172	0.766566		0.60377	0.551788		0.149541	0.814547		0.603798	0.67201		0.345576	0.653099
0.479137	0.63642		0.0317812	0.794264		0.0962822	0.586562		0.529691	0.638402		0.0434258	0.560919		0.0523423	0.743414		0.60845	0.470035		0.658405	0.652864		0.169818	0.677963		0.0973985	0.766855		0.8212	0.535168		0.403694	0.652437		0.204695	0.807492		0.689275	0.491726		0.154768	0.822923		0.609082	0.697683		0.274274	0.680079
0.4214	0.643159		0.00990952	0.782217		0.0761798	0.497944		0.554331	0.634363		0.216217	0.596627		0.0815603	0.753828		0.640229	0.501737		0.191947	0.681235		0.191729	0.670121		0.207948	0.775627		0.588068	0.534783		0.297388	0.723399		0.157414	0.756487		0.799904	0.576237		0.12166	0.779411		0.565753	0.705246		0.13199	0.738038
0.466468	0.641715		0.00589499	0.770048		0.641472	0.585465		0.504334	0.628612		0.195904	0.643311		1.6506e-05	0.717183		0.585844	0.480669		0.402155	0.653947		0.154557	0.716333		0.223209	0.761983		0.476047	0.503572		0.117838	0.728536		0.223706	0.754715		0.839784	0.537328		0.0623079	0.816612		0.560627	0.701722		0.231646	0.706057
0.591407	0.614779		0.0127838	0.777172		0.60294	0.575054		0.502478	0.612171		0.0401738	0.677801		0.0879535	0.731653		0.577945	0.486664		0.730255	0.56047		0.16905	0.717548		0.190593	0.759387		0.587657	0.520272		0.00496714	0.759404		0.428235	0.778047		0.845161	0.538203		0.117179	0.83316		0.513703	0.690431		0.218766	0.706881
0.663204	0.561719		0.303365	0.735383		0.41136	0.591113		0.496353	0.615873		0.107627	0.57811		0.0929966	0.762747		0.560596	0.482669		0.566959	0.544857		0.178619	0.654609		0.13444	0.784162		0.545557	0.505302		0.114071	0.762951		0.12723	0.803443		0.451642	0.523731		0.130942	0.834843		0.520887	0.687752		0.161581	0.694026
1.05797	0.442222		0.624642	0.769174		0.324679	0.624716		0.521274	0.613714		0.0287897	0.499205		0.0472657	0.683982		0.525109	0.473795		0.211154	0.661475		0.208596	0.609563		0.0916035	0.717849		0.480353	0.520991		0.0461511	0.734908		0.0585853	0.817801		0.793135	0.559243		0.107834	0.787524		0.523203	0.692468		0.179694	0.714918
0.959114	0.527057		0.527051	0.734669		0.264519	0.670216		0.493092	0.644174		0.10103	0.545957		0.124378	0.794345		0.556755	0.473358		0.196656	0.644893		0.19928	0.628833		0.06416	0.767088		0.427621	0.554157		0.075603	0.768511		0.080417	0.764267		0.627555	0.550691		0.0743111	0.80134		0.532296	0.680964		0.2392	0.742578
0.5103	0.636749		0.199383	0.745289		0.105816	0.638372		0.515631	0.632217		0.106769	0.594936		0.0232251	0.688439		0.712524	0.458679		0.322105	0.621598		0.174659	0.712221		0.0699953	0.782975		0.452325	0.515761		0.313755	0.696653		0.234853	0.795491		0.529099	0.551753		0.0284531	0.697441		0.533296	0.680824		0.219085	0.698288
0.365864	0.637946		0.0184041	0.765438		0.161138	0.672042		0.477149	0.626431		0.0110395	0.676433		0.084416	0.620409		0.818161	0.498751		0.490967	0.586045		0.212617	0.68778		0.0731777	0.729245		0.36217	0.571764		0.032924	0.689065		0.125963	0.747712		0.447677	0.533431		0.0991426	0.658883		0.513505	0.683846		0.176613	0.702194
0.349845	0.664925		0.0218234	0.793781		0.575368	0.546895		0.472833	0.627862		0.396925	0.646198		0.230809	0.606996		0.75491	0.473775		0.25137	0.617759		0.214612	0.720232		0.0833583	0.723697		0.421929	0.544726		0.0998769	0.68043		0.0458808	0.786844		0.486544	0.57234		0.029305	0.702567		0.492607	0.667144		0.23341	0.703164
0.332831	0.665401		0.00575286	0.768162		0.63748	0.588149		0.471193	0.618431		0.11018	0.392904		0.147434	0.657793		0.625616	0.50879		0.549559	0.582419		0.175159	0.722545		0.0913751	0.789826		0.597039	0.535018		0.154951	0.699408		0.0322405	0.792158		0.394626	0.583136		0.0424975	0.803714		0.483252	0.685615		0.206422	0.719771
0.368874	0.681432		0.105446	0.780701		0.342947	0.620819		0.467195	0.631732		0.2	0.518502		0.135218	0.794957		0.595238	0.480688		0.651664	0.596255		0.20023	0.711489		0.0847104	0.770644		0.850849	0.531388		0.00989316	0.675111		0.0413523	0.77257		0.296415	0.588472		0.0563047	0.796601		0.492691	0.677758		0.281595	0.690867
0.718247	0.575112		0.000644243	0.770169		0.141315	0.635063		0.482795	0.624471		0.216079	0.534526		0.07101	0.721866		0.634766	0.437864		0.280785	0.606076		0.202761	0.7387		0.114489	0.729463		0.883765	0.5776		0.0915149	0.671779		0.134261	0.794417		0.333279	0.601499		0.027297	0.816663		0.506079	0.674305		0.24388	0.730951
0.545849	0.599073		0.235761	0.709075		0.0745739	0.607744		0.49008	0.645486		0.15592	0.619707		0.0197384	0.667206		0.657622	0.440931		0.158085	0.664588		0.198079	0.719372		0.00866142	0.752433		0.829837	0.550685		0.250568	0.674698		0.476818	0.756273		0.268626	0.603966		0.037149	0.765267		0.553818	0.652775		0.239519	0.719102
0.374636	0.681786		0.203443	0.760464		0.132414	0.629383		0.45218	0.614895		0.182303	0.567822		0.0348722	0.671142		0.653067	0.435493		0.300065	0.621519		0.217807	0.737393		0.000586604	0.746206		0.836836	0.543696		0.0706709	0.707884		0.417944	0.71991		0.275153	0.599095		0.0176933	0.769577		0.545835	0.695529		0.230052	0.696997
0.186939	0.762586		0.0589655	0.857599		0.21872	0.787433		0.451958	0.730078		0.0828802	0.647117		0.00300325	0.78479		0.166612	0.578081		0.332064	0.744613		0.202659	0.522598		0.102341	0.798238		0.0726057	0.745523		0.141266	0.69696		0.069713	0.772034		0.0544085	0.736013		0.0129231	0.837346		0.454293	0.802636		0.181829	0.741172
0.0678789	0.769184		0.0647265	0.830775		0.0880085	0.812146		0.508903	0.751667		0.129143	0.563391		0.0525454	0.769844		0.118597	0.595289		0.223003	0.684869		0.189232	0.646585		0.056374	0.79874		0.118374	0.738251		0.617333	0.662836		0.0694263	0.742046		0.0518993	0.724564		0.0110907	0.896017		0.721232	0.784087		0.255864	0.760162
0.0361019	0.783227		0.041587	0.812539		0.12379	0.715805		0.441129	0.659755		0.0715157	0.786039		0.0327877	0.790028		0.062466	0.644226		0.0951534	0.716721		0.149525	0.640144		0.0749122	0.842719		0.0643265	0.810859		0.182843	0.640952		0.113956	0.787345		0.171586	0.693443		0.00379734	0.896604		0.700432	0.798359		0.238783	0.748851
0.0673928	0.768801		0.0394248	0.787937		0.0494811	0.783996		0.460113	0.69812		0.103361	0.709586		0.0752095	0.769463		0.0647773	0.632814		0.0935134	0.761166		0.0950402	0.644195		0.0444973	0.832562		0.116351	0.735308		0.588667	0.659576		0.0898049	0.779199		0.0732728	0.657269		0.0133572	0.888243		0.623615	0.786343		0.13567	0.75631
0.0179296	0.801341		0.133198	0.83283		0.0061914	0.849416		0.321141	0.757176		0.128678	0.688297		0.0275628	0.799589		0.0934918	0.688938		0.0663952	0.708371		0.0635771	0.71185		0.0200363	0.87636		0.175859	0.759427		0.314913	0.62476		0.107239	0.815678		0.0390242	0.742073		0.0207529	0.914137		0.265501	0.737341		0.0211465	0.827056
0.0319984	0.755305		0.1029	0.824516		0.0723533	0.792982		0.0924182	0.795915		0.0738167	0.676532		0.041202	0.790851		0.0780914	0.695628		0.024352	0.754656		0.0781704	0.683983		0.0275089	0.834338		0.0968469	0.801168		0.0628952	0.651333		0.16689	0.813099		0.0250249	0.732009		0.00300822	0.915102		0.0545158	0.772741		0.226885	0.773784
0.0331217	0.768261		0.0425331	0.824805		0.103044	0.753014		0.0124874	0.813214		0.0636349	0.665697		0.0287541	0.825184		0.0875868	0.693942		0.147957	0.738692		0.0522128	0.638438		0.0453015	0.886024		0.23609	0.695451		0.0803849	0.707858		0.316597	0.737032		0.00999667	0.773465		0.000708578	0.917408		0.00765663	0.810197		0.218814	0.746884
0.0423549	0.757696		0.0599546	0.85355		0.0684446	0.826622		3.2709e-05	0.823764		0.208352	0.702712		0.0148069	0.793003		0.308247	0.595248		0.579741	0.7427		0.0400668	0.668483		0.036714	0.843789		0.333252	0.691901		0.0379144	0.733736		0.440633	0.743194		0.0167213	0.739704		0.00626363	0.921885		0.119644	0.773862		0.225154	0.750343
0.0967898	0.696425		0.0748823	0.826418		0.202928	0.733693		0.0114899	0.837949		0.206529	0.720115		0.0255412	0.769264		0.268389	0.566646		0.129931	0.751107		0.017342	0.757703		0.0388479	0.856822		0.10456	0.829453		0.0326545	0.738887		0.397882	0.759998		0.0534747	0.707171		0.0333973	0.927821		0.0550666	0.807501		0.131957	0.773376
0.0415763	0.820394		0.157139	0.820054		0.17074	0.805369		0.0227722	0.848525		0.191956	0.601073		0.00539625	0.773341		0.126119	0.593263		0.0936503	0.759812		0.0482439	0.806012		0.0484718	0.862846		0.142112	0.776132		0.16441	0.771328		0.0647441	0.826847		0.0731832	0.670903		0.00709324	0.942399		0.0121755	0.7714		0.052583	0.765417
0.11297	0.722264		0.0492191	0.81928		0.0647846	0.741986		0.0515579	0.827595		0.0942493	0.737814		0.0288522	0.800192		0.163412	0.571037		0.0690291	0.764254		0.0266489	0.782529		0.0383659	0.902938		0.271006	0.617852		0.00171467	0.638228		0.0617054	0.777372		0.0739447	0.709334		0.00429614	0.925436		0.0405742	0.768361		0.0585281	0.791233
0.110594	0.803709		0.156538	0.869051		0.25181	0.695451		0.0187321	0.84579		0.0805888	0.647248		0.0499328	0.807023		0.0295712	0.603855		0.00512178	0.711769		0.0147047	0.780869		0.0221847	0.88219		0.279584	0.667276		0.07427	0.733133		0.0744866	0.790286		0.0174856	0.682321		0.013729	0.956848		0.0208564	0.76267		0.0834263	0.817547
0			0			0			0			0			0			0			0			0			0			0			0			0			0			0			0			0
0.0669192	0.753251		0.0927146	0.851123		0.109873	0.812691		0.137001	0.781481		0.133676	0.63492		0.0233482	0.82508		0.0999763	0.595938		0.0535706	0.746194		0.0599083	0.731445		0.00642026	0.868906		0.12723	0.759728		0.263881	0.706299		0.108059	0.793227		0.0211168	0.6888		0.0144493	0.948997		0.688594	0.806648		0.0854452	0.837417
0.0601059	0.730086		0.0847771	0.842277		0.0635654	0.79568		0.0354997	0.802802		0.0676531	0.660251		0.0353269	0.760334		0.0752576	0.694025		0.105686	0.750114		0.0768522	0.769822		0.0168143	0.845025		0.183641	0.717342		0.00810136	0.753072		0.0876811	0.787634		0.0041449	0.69915		0.00962311	0.950358		0.579588	0.814943		0.062367	0.792175
0.107347	0.710067		0.0154086	0.821046		0.0030313	0.746941		0.0262268	0.763632		0.209442	0.710584		0.0400476	0.775814		0.0188769	0.695295		0.0622366	0.778679		0.014349	0.773723		0.0195116	0.851904		0.241745	0.719038		0.135366	0.707955		0.139976	0.810781		0.0462525	0.744404		0.0117006	0.954914		0.530703	0.800294		0.0339397	0.778492
0.0248854	0.737709		0.229707	0.816697		0.141984	0.696387		0.000592696	0.841566		0.134134	0.768419		0.000178518	0.824276		0.00718035	0.647784		0.0816089	0.730473		0.0239591	0.753921		0.0149698	0.855767		0.074013	0.79182		0.0789079	0.722454		0.144849	0.79692		0.0929295	0.735944		0.0258559	0.944309		0.133048	0.722913		0.00322856	0.769414
0.0468234	0.765779		0.243135	0.865361		0.313086	0.702633		0.00675488	0.802266		0.11788	0.636179		0.0140427	0.838584		0.264912	0.58194		0.315264	0.708473		0.0280739	0.812055		0.00408765	0.832258		0.138574	0.725884		0.485307	0.663469		0.165476	0.753167		0.0243513	0.664259		0.0100331	0.943364		0.15585	0.815878		0.125411	0.740582
0.0689849	0.728337		0.0267748	0.851679		0.136735	0.74934		0.292022	0.717726		0.126239	0.61086		0.074155	0.725768		0.152275	0.628994		0.117262	0.772599		0.000966368	0.804186		0.00597637	0.839759		0.116831	0.759076		0.0805656	0.704084		0.466136	0.776905		0.0377588	0.788369		0.0224414	0.952478		0.0651382	0.759697		0.137922	0.735873
0.0598898	0.775683		0.155139	0.791942		0.161219	0.78984		0.0767515	0.770044		0.226512	0.655484		0.0576355	0.790681		0.0198904	0.63364		0.180783	0.780614		0.00203257	0.817008		0.0169791	0.892031		0.300001	0.643099		0.0702085	0.718532		0.122158	0.76101		0.109324	0.682132		0.0411744	0.935484		0.306329	0.714708		0.112522	0.74928
0.112897	0.666726		0.229936	0.74941		0.093762	0.653347		0.0963539	0.777573		0.230119	0.650597		0.0519537	0.798043		0.0868522	0.654107		0.232015	0.697939		0.0129848	0.780834		0.0583325	0.83258		0.044067	0.759132		0.0243821	0.753546		0.0312069	0.791922			0.628381		0.024102	0.945671		0.0138847	0.757173		0.134504	0.753967
0.110092	0.718709		0.0735632	0.719866		0.0900618	0.715499		0.00727645	0.829735		0.171449	0.736189		0.0983301	0.741729		0.0203226	0.694983		0.397748	0.704581		0.0637191	0.690257		0.0340588	0.836397		0.10858	0.7455		0.118043	0.728917		0.0127996	0.779681		0.0750552	0.731897		0.012828	0.94751		0.0322455	0.775651		0.149882	0.732842
0.181589	0.728257		0.0559242	0.769264		0.0339763	0.813225		0.0275169	0.835919		0.228021	0.694785		0.00534028	0.781658		0.0054116	0.616222		0.160407	0.728487		0.0191803	0.731527		0.000443773	0.773264		0.0590344	0.790194		0.311687	0.726211		0.0862454	0.791102		0.107138	0.765934		0.0302645	0.950816		0.0693593	0.779884		0.153646	0.725434
0.171605	0.702466		0.0585917	0.764177		0.058996	0.725093		0.073159	0.800903		0.0153498	0.666075		0.0309965	0.843976		0.164209	0.612762		0.0052612	0.742466		0.0302911	0.782431		0.0487456	0.787526		0.274259	0.652731		0.167696	0.731348		0.304402	0.77826			0.726081		0.0124463	0.946407		0.26793	0.784109		0.137641	0.723009
0.0911792	0.795212		0.178632	0.774327		0.312167	0.654366		0.0129679	0.775733		0.0297051	0.691924		0.015824	0.811737		0.0171079	0.589404		0.0140011	0.742278		0.0328597	0.792407		0.0575574	0.830794		0.0919691	0.684423		0.582824	0.651336		0.194534	0.777261		0.0389021	0.784584		0.0273911	0.938697		0.141288	0.727022		0.114145	0.762549
0.0769718	0.74833		0.00199341	0.797345		0.325643	0.650806		0.0233759	0.836214		0.024535	0.652235		0.0368964	0.759342		0.180771	0.69319		0.106696	0.763933		0.036788	0.776762		0.0384036	0.809698		0.181002	0.692534		0.0896466	0.691218		0.019058	0.798917		0.155417	0.63849		0.0440494	0.932362		0.067426	0.729304		0.164516	0.714192
0.14289	0.707095		0.373516	0.835546		0.327919	0.637169		0.0120979	0.82263		0.192324	0.657314		0.0427465	0.760554		0.212952	0.609479		0.0130402	0.732887		0.0449921	0.734431		0.0623925	0.803849		0.158966	0.710319		0.0590234	0.742349		0.0249603	0.795131		0.201306	0.696156		0.0143722	0.942055		0.0791749	0.792772		0.117076	0.725617
0.885983	0.567996		0.842637	0.796476		0.308645	0.631111		0.0199408	0.849539		0.118554	0.693484		0.0163632	0.766896		0.0543761	0.648892		0.494018	0.727651		0.0111924	0.800976		0.0240581	0.775172		0.0928426	0.711266		0.0588056	0.688356		0.0620496	0.837072		0.325072	0.765773		0.01613	0.913679		0.239017	0.738734		0.0848661	0.733173
0.826665	0.608562		0.751457	0.791154		0.299442	0.650425		0.000616995	0.861031		0.100572	0.645759		0.0374845	0.780821		0.0743306	0.721164		0.0917728	0.746829		0.0109674	0.781686		0.000524351	0.794281		0.329827	0.627688		0.0106509	0.727036		0.010707	0.809298		0.0958536	0.666473		0.0301068	0.933158		0.0415927	0.761692		0.0599258	0.697924
0.512289	0.706592		0.537437	0.803613		0.312042	0.670775		0.134271	0.782828		0.127453	0.665671		0.0175197	0.735385		0.308085	0.554543		0.115097	0.723016		0.0226957	0.790619		0.0118174	0.836928		0.04674	0.71616		0.0416538	0.711025		0.111975	0.784018		0.24934	0.735351		0.0347279	0.932593		0.0207588	0.729051		0.110265	0.734742
0.692431	0.681597		0.565773	0.708129		0.2825	0.714445		0.580902	0.711167		0.169219	0.609899		0.167192	0.757567		0.90866	0.555932		0.288498	0.735971		0.12554	0.612284		0.119805	0.699173		0.709672	0.641913		0.0522325	0.721116		0.827163	0.677631		0.994891	0.597364		0.0979529	0.789763		0.244332	0.705811		0.212291	0.695363
0.590601	0.673688		0.877629	0.737334		0.335052	0.676984		0.733161	0.668678		0.148402	0.633448		0.148177	0.80649		0.822128	0.582193		0.853225	0.692775		0.0335835	0.620613		0.135406	0.772505		0.680259	0.624861		0.0611012	0.696618		0.435089	0.700136		1.02244	0.623965		0.0988562	0.806134		0.666539	0.745102		0.235241	0.704612
0.308048	0.651423		0.800698	0.732569		0.200922	0.689794		0.631316	0.672135		0.101573	0.587129		0.0992512	0.792363		0.734612	0.565521		0.318978	0.739209		0.14078	0.545891		0.142684	0.774083		0.655623	0.610996		0.180882	0.716474		0.363733	0.701194		0.939653	0.554407		0.119186	0.777838		0.578568	0.715921		0.237706	0.710705
0.311253	0.740091		0.515931	0.748012		0.0285606	0.638752		0.424577	0.696721		0.0159091	0.673988		0.0855354	0.731502		0.673575	0.544356		0.225262	0.746089		0.0663037	0.531032		0.157602	0.820891		0.646848	0.623425		0.0440886	0.707176		0.236188	0.695196		0.913727	0.523078		0.150139	0.784987		0.575754	0.710833		0.23456	0.70404
0.42164	0.714751		0.16592	0.790357		0.154785	0.668874		0.464144	0.70017		0.0571087	0.584506		0.107819	0.76237		0.697788	0.56197		0.401263	0.7299		0.147294	0.595821		0.167292	0.763231		0.657078	0.62708		0.123295	0.731046		0.255676	0.687262		0.645377	0.551121		0.141824	0.775651		0.541198	0.734854		0.243107	0.71458
0.319079	0.725314		0.158777	0.799414		0.174711	0.584788		0.460109	0.686998		0.219486	0.676167		0.0246183	0.69212		0.700572	0.579102		0.592537	0.686063		0.304086	0.654431		0.141455	0.764647		0.479943	0.584783		0.217634	0.719721		0.18336	0.706743		1.05753	0.601245		0.090192	0.80982		0.461847	0.720275		0.239646	0.72817
0.30201	0.684053		0.253132	0.75257		0.199818	0.555862		0.708487	0.653063		0.123504	0.621518		0.117901	0.775794		0.680198	0.564079		0.567435	0.691008		0.271432	0.758548		0.151142	0.81486		0.649614	0.589878		0.00225044	0.703449		0.227894	0.734818		1.03117	0.599738		0.0598378	0.834699		0.48076	0.717732		0.239444	0.731085
0.279974	0.736344		0.170078	0.742564		0.170642	0.607923		0.640176	0.695647		0.00890572	0.62383		0.0476743	0.698351		0.686732	0.546245		0.738233	0.693033		0.19229	0.764535		0.169395	0.819318		0.360639	0.614792		0.115088	0.652306		0.392585	0.734303		0.60757	0.556186		0.0827693	0.817445		0.473733	0.732376		0.149567	0.76061
0.553417	0.671832		0.192029	0.747915		0.0973328	0.614554		0.568922	0.685125		0.0890423	0.579697		0.0147001	0.714535		0.684752	0.560225		0.301821	0.742078		0.157442	0.759475		0.173703	0.822544		0.631245	0.601931		0.383498	0.654244		0.393937	0.695309		0.707804	0.572886		0.123024	0.827584		0.374681	0.69087		0.16729	0.741904
0.517461	0.691112		0.14908	0.762116		0.337743	0.725806		0.551061	0.67777		0.144015	0.677174		0.0746357	0.717673		0.696548	0.573635		0.283495	0.755754		0.107909	0.76416		0.150157	0.779489		0.32568	0.597607		0.0166838	0.632642		0.171267	0.717426		0.43096	0.569771		0.11738	0.797773		0.485732	0.743762		0.225775	0.707927
0.325308	0.681177		0.152069	0.765893		0.150923	0.683773		0.550193	0.697765		0.0975589	0.719658		0.109669	0.657723		0.688911	0.556174		0.485539	0.709996		0.0792021	0.712543		0.153649	0.780854		0.44646	0.612668		0.0794881	0.716296		0.219195	0.714325		0.356333	0.585668		0.0940522	0.767583		0.513992	0.736717		0.262736	0.705426
0.265073	0.647464		0.434973	0.739002		0.181231	0.645896		0.551613	0.686119		0.233962	0.585582		0.0112454	0.763109		0.608554	0.571517		0.662916	0.674453		0.153186	0.778321		0.13504	0.768669		0.459507	0.569617		0.113071	0.656653		0.149314	0.706945		0.32628	0.627135		0.115134	0.831397		0.538737	0.713267		0.353244	0.699423
0.319008	0.679127		0.605986	0.756866		0.102063	0.633064		0.545611	0.676576		0.119522	0.687599		0.0160237	0.717808		0.621607	0.562226		0.231947	0.70881		0.144042	0.803196		0.138524	0.767235		0.407909	0.580857		0.340649	0.631222		0.228697	0.706492		0.614644	0.561324		0.137329	0.828739		0.543942	0.723928		0.341239	0.691962
0.321425	0.696433		0.197431	0.772128		0.114434	0.600211		0.524843	0.709044		0.139602	0.675119		0.064694	0.661628		0.626514	0.555149		0.197742	0.74432		0.165004	0.719266		0.112525	0.783932		0.383669	0.600712		0.320705	0.703572		0.201529	0.718722		0.804072	0.634683		0.130155	0.828062		0.534134	0.727271		0.279802	0.697791
0.352338	0.694016		0.106948	0.776485		0.14617	0.631914		0.530634	0.709513		0.0735447	0.6486		0.00369469	0.672828		0.642488	0.53045		0.56883	0.723234		0.180479	0.744368		0.115692	0.844068		0.573843	0.583547		0.00462512	0.712591		0.119404	0.711706		0.586284	0.556147		0.135812	0.822005		0.582941	0.694157		0.26215	0.691157
0.368543	0.647214		0.124757	0.770331		0.155528	0.607587		0.510959	0.662131		0.124015	0.548541		0.00240951	0.723456		0.638021	0.547091		0.663526	0.727503		0.155113	0.71084		0.119583	0.771985		0.541616	0.59687		0.329424	0.672177		0.279182	0.724323		0.671789	0.597441		0.141039	0.833565		0.588226	0.70112		0.190848	0.69251
0.310806	0.653957		0.166448	0.770619		0.17563	0.613443		0.535599	0.652082		0.135628	0.653828		0.0316275	0.773263		0.6698	0.565567		0.197068	0.737856		0.177024	0.723385		0.230133	0.758383		0.308484	0.581492		0.223118	0.699732		0.231901	0.724802		0.782419	0.563913		0.107931	0.796382		0.544897	0.721463		0.0485641	0.756078
0.355874	0.690813		0.150643	0.763932		0.389663	0.753125		0.485602	0.667487		0.115315	0.650545		0.0499493	0.690788		0.615416	0.555725		0.407277	0.72099		0.139852	0.737086		0.245394	0.762319		0.196463	0.599926		0.0435683	0.702424		0.298192	0.703122		0.822299	0.507105		0.0485789	0.825872		0.53977	0.724937		0.14822	0.694467
0.480813	0.647971		0.143754	0.764031		0.35113	0.700677		0.483746	0.646621		0.120763	0.68204		0.0380207	0.761923		0.607516	0.552288		0.735377	0.614073		0.154345	0.749971		0.212778	0.77795		0.308073	0.598221		0.0792371	0.763273		0.502722	0.694862		0.827675	0.554616		0.10345	0.845784		0.492846	0.715245		0.13534	0.743925
0.55261	0.61207		0.459903	0.708089		0.15955	0.665715		0.477621	0.657563		0.188216	0.60814		0.0430638	0.692684		0.590167	0.543841		0.572081	0.607305		0.163914	0.709941		0.156625	0.79026		0.265973	0.580786		0.0398014	0.712005		0.201717	0.681436		0.434157	0.530091		0.117213	0.843922		0.500031	0.717296		0.0781546	0.668539
0.94738	0.489914		0.78118	0.731178		0.0728691	0.677044		0.502542	0.645068		0.109378	0.595211		0.0971985	0.685008		0.55468	0.546061		0.216275	0.673755		0.193891	0.669076		0.113788	0.725841		0.200769	0.600877		0.0281189	0.722599		0.133072	0.720989		0.775649	0.604346		0.0941046	0.790724		0.502347	0.724156		0.0962675	0.723782
0.84852	0.563795		0.683589	0.707354		0.0127096	0.719242		0.474359	0.662125		0.181619	0.69631		0.0744453	0.753148		0.586326	0.536807		0.201778	0.656693		0.184575	0.679756		0.0863448	0.777052		0.148037	0.649236		0.149873	0.699654		0.154904	0.729044		0.610069	0.612723		0.0605821	0.810465		0.511439	0.699095		0.155774	0.735521
0.399706	0.696318		0.355922	0.709373		0.145994	0.653929		0.496899	0.663134		0.0261806	0.554444		0.0731579	0.667648		0.742095	0.544945		0.327227	0.698726		0.159954	0.727465		0.09218	0.78666		0.172741	0.604992		0.388025	0.688813		0.309339	0.691802		0.511613	0.482376		0.0147241	0.692148		0.51244	0.701975		0.135659	0.704465
0.25527	0.7197		0.174942	0.784442		0.0906721	0.70705		0.458417	0.673247		0.0916283	0.562634		0.134349	0.63642		0.847732	0.541967		0.496088	0.650363		0.197912	0.740557		0.0953624	0.734352		0.0825866	0.645578		0.041346	0.696757		0.200449	0.675736		0.430191	0.506767		0.112872	0.670032		0.492649	0.689895		0.093187	0.711967
0.239251	0.705042		0.134715	0.78611		0.323558	0.746948		0.454101	0.652811		0.477513	0.630604		0.280742	0.602651		0.784481	0.544638		0.256492	0.668201		0.199908	0.745481		0.105543	0.748839		0.142345	0.602379		0.174147	0.692775		0.120367	0.712096		0.469059	0.560156		0.0155761	0.709273		0.471751	0.694636		0.149984	0.741502
0.222237	0.717825		0.150785	0.763842		0.38567	0.711387		0.452461	0.648345		0.190769	0.453577		0.197367	0.652721		0.655187	0.5615		0.554681	0.642813		0.160454	0.767427		0.11356	0.793971		0.317455	0.601999		0.229221	0.634832		0.106727	0.706869		0.377141	0.592983		0.0287685	0.799299		0.462396	0.698841		0.122996	0.71196
0.25828	0.723041		0.261985	0.751458		0.0911375	0.674119		0.448462	0.672268		0.119412	0.590023		0.0852851	0.754803		0.624809	0.530664		0.656786	0.668452		0.185525	0.761661		0.106895	0.752435		0.571266	0.576604		0.0643768	0.677519		0.115839	0.712323		0.278929	0.604441		0.0425758	0.810765		0.471835	0.690516		0.198169	0.710922
0.607653	0.64024		0.157183	0.757157		0.110494	0.621283		0.464062	0.666326		0.13549	0.685743		0.0210772	0.714893		0.664337	0.548995		0.285907	0.689241		0.188057	0.753687		0.136673	0.744458		0.604181	0.599137		0.165785	0.683077		0.208747	0.70693		0.315794	0.611633		0.013568	0.828709		0.485223	0.693268		0.160454	0.763032
0.435255	0.682754		0.392299	0.693599		0.177236	0.639998		0.471348	0.677255		0.0753312	0.616908		0.0301944	0.696047		0.687193	0.538321		0.163207	0.731103		0.183374	0.769131		0.0135233	0.760884		0.550253	0.563982		0.324838	0.658748		0.551305	0.691163		0.25114	0.613967		0.02342	0.767852		0.532962	0.680059		0.156092	0.73877
0.264042	0.73391		0.359982	0.733997		0.119396	0.647877		0.433448	0.644003		0.101714	0.631154		0.0848049	0.655389		0.682638	0.529546		0.305187	0.683376		0.203102	0.732186		0.0227714	0.755473		0.557253	0.583769		0.00359907	0.725207		0.49243	0.633469		0.257667	0.612026		0.00396438	0.776386		0.524978	0.714362		0.146626	0.729969
0.253858	0.75907		0.0337491	0.824174		0.108847	0.872954		0.314957	0.780482		0.216556	0.703249		0.0203449	0.786008		0.0666353	0.707093		0.278494	0.741927		0.262567	0.494358		0.108761	0.782534		0.0546242	0.724809		0.405148	0.636414		0.0383461	0.82768		0.0755253	0.687835		0.00152611	0.839928		0.234302	0.836801		0.267274	0.740237
0.134798	0.692333		0.0279881	0.827473		0.0218648	0.90611		0.371902	0.802769		0.00453299	0.750915		0.0758936	0.772232		0.0186212	0.70661		0.169433	0.718453		0.24914	0.567405		0.0627942	0.791627		0.00885621	0.693614		0.881215	0.609049		0.0386328	0.821569		0.0730162	0.696435		0.00335851	0.890161		0.0326373	0.928546		0.341309	0.759395
0.0308173	0.811143		0.134302	0.774762		0.233663	0.789881		0.304128	0.756699		0.205192	0.60642		0.0561358	0.78651		0.0375103	0.656231		0.0415828	0.694201		0.209433	0.623149		0.0813324	0.835174		0.0629034	0.707579		0.446725	0.597249		0.00589661	0.782528		0.192703	0.65222		0.0106519	0.887614		0.0118381	0.907147		0.324228	0.733683
0.000473592	0.734968		0.132139	0.805229		0.0603923	0.870258		0.323112	0.750535		0.237037	0.612508		0.0518613	0.737812		0.0351989	0.689273		0.0399428	0.74576		0.154948	0.573726		0.0509176	0.828362		0.0108785	0.738575		0.852548	0.629767		0.0182542	0.798489		0.0943896	0.678066		0.00109206	0.882883		0.0649791	0.910653		0.221115	0.758328
0.0489897	0.759078		0.225913	0.78352		0.103682	0.870288		0.184141	0.808138		0.262354	0.626613		0.050911	0.795448		0.00648446	0.666443		0.0128246	0.708888		0.123485	0.625064		0.0264565	0.854246		0.0486293	0.711465		0.578794	0.555979		0.000819736	0.841613		0.0179074	0.723093		0.00630367	0.909996		0.423093	0.82397		0.0642987	0.803043
0.0349208	0.806239		0.195614	0.811126		0.03752	0.8926		0.0445827	0.802119		0.0598595	0.704029		0.0178538	0.787377		0.178068	0.569024		0.0292186	0.689203		0.138079	0.609854		0.0339291	0.865809		0.0303831	0.776089		0.326777	0.593928		0.0588312	0.880626		0.00390808	0.742538		0.011441	0.906537		0.634079	0.793693		0.31233	0.74176
0.100041	0.784742		0.0501816	0.823935		0.212917	0.827889		0.124513	0.794273		0.197311	0.727356		0.0521022	0.795687		0.0123895	0.568499		0.0943868	0.721458		0.112121	0.623698		0.0517218	0.871492		0.10886	0.718634		0.344266	0.649425		0.208538	0.842918		0.0311135	0.737161		0.0137407	0.913945		0.680938	0.788149		0.304259	0.759009
0.0245644	0.760822		0.03276	0.838378		0.0414288	0.892562		0.137034	0.786288		0.342028	0.658369		0.0381551	0.814962		0.208271	0.702216		0.52617	0.759385		0.0999751	0.586028		0.0431342	0.862784		0.206022	0.707624		0.301796	0.669873		0.332574	0.849155		0.0378381	0.737541		0.00818562	0.915214		0.56895	0.79372		0.310599	0.740741
0.0298705	0.739405		0.167597	0.812909		0.312801	0.683459		0.148491	0.78116		0.340205	0.604028		0.00219303	0.75255		0.168412	0.638652		0.0763606	0.720816		0.0425663	0.642081		0.0452682	0.850968		0.0226696	0.749195		0.231227	0.67504		0.289823	0.834875		0.0745916	0.627046		0.018948	0.927762		0.633528	0.79308		0.217402	0.782553
0.0253429	0.786186		0.249854	0.777109		0.0608669	0.908886		0.159773	0.780778		0.0582801	0.723272		0.0179519	0.764864		0.0261429	0.664692		0.0400798	0.724797		0.108152	0.676916		0.054892	0.88982		0.0148824	0.766837		0.428291	0.645737		0.043315	0.811936		0.0943	0.647817		0.0215425	0.943138		0.70077	0.789548		0.138028	0.775166
0.046051	0.77619		0.141934	0.832399		0.174658	0.843821		0.0854429	0.836454		0.227926	0.705115		0.00550402	0.802997		0.063436	0.776285		0.0154585	0.761134		0.0865572	0.67208		0.0447862	0.888723		0.143776	0.671472		0.262167	0.641856		0.0463537	0.85812		0.0528279	0.742908		0.0101531	0.929669		0.64802	0.814864		0.0269171	0.796245
0.0436748	0.732995		0.0638237	0.822219		0.361683	0.704929		0.155733	0.778427		0.0530874	0.811858		0.0265846	0.786271		0.0704051	0.690402		0.0484488	0.674086		0.0452036	0.615143		0.028605	0.837994		0.152354	0.676147		0.189611	0.755212		0.0335725	0.843618		0.00363119	0.687005		0.0281782	0.945098		0.709451	0.780634		0.00201889	0.844661
0.0669192	0.753251		0.0927146	0.851123		0.109873	0.812691		0.137001	0.781481		0.133676	0.63492		0.0233482	0.82508		0.0999763	0.595938		0.0535706	0.746194		0.0599083	0.731445		0.00642026	0.868906		0.12723	0.759728		0.263881	0.706299		0.108059	0.793227		0.0211168	0.6888		0.0144493	0.948997		0.688594	0.806648		0.0854452	0.837417
0			0			0			0			0			0			0			0			0			0			0			0			0			0			0			0			0
0.0068133	0.76632		0.177492	0.783948		0.046308	0.899875		0.101501	0.742658		0.201329	0.701799		0.0119787	0.788046		0.175234	0.531088		0.0521151	0.746321		0.13676	0.6452		0.0232345	0.851086		0.0564106	0.737082		0.25578	0.717082		0.020378	0.825288		0.0169719	0.784798		0.00482614	0.943596		0.109007	0.914539		0.147812	0.807975
0.0404273	0.713457		0.108123	0.776573		0.106842	0.867353		0.110774	0.820608		0.343118	0.629439		0.0166994	0.797164		0.0810994	0.548179		0.00866602	0.783054		0.0742573	0.675869		0.0130913	0.844229		0.114515	0.741174		0.128515	0.741369		0.0319173	0.843619		0.0251356	0.734849		0.0027487	0.948671		0.157892	0.907667		0.119385	0.760812
0.0420338	0.733947		0.322421	0.782827		0.251858	0.832244		0.137594	0.73502		0.26781	0.547473		0.0235267	0.817154		0.092796	0.647402		0.0280383	0.763484		0.0838674	0.611632		0.00854955	0.84385		0.053217	0.78131		0.184974	0.727804		0.0367901	0.827483		0.114046	0.644099		0.0114066	0.940865		0.555547	0.750712		0.0886738	0.799318
0.0200958	0.739352		0.150421	0.853484		0.422959	0.678346		0.130246	0.782378		0.251556	0.64373		0.00930545	0.786665		0.164936	0.664941		0.261694	0.757892		0.0879822	0.702957		0.0105079	0.846432		0.0113437	0.779854		0.749188	0.601374		0.0574167	0.73737		0.0454681	0.731313		0.00441617	0.942215		0.532745	0.774359		0.210856	0.794279
0.0020657	0.753388		0.0659399	0.844353		0.246608	0.695215		0.155021	0.828313		0.259915	0.611826		0.0508068	0.741144		0.0522989	0.651099		0.0636913	0.760109		0.0589419	0.686341		0.0123966	0.835221		0.0103992	0.72343		0.344447	0.643807		0.358077	0.842088		0.0166419	0.720326		0.00799216	0.94832		0.623456	0.825137		0.223367	0.72066
0.00702937	0.816745		0.0624246	0.798092		0.0513454	0.908971		0.0602493	0.766193		0.360188	0.647561		0.0342873	0.721137		0.0800859	0.625145		0.127212	0.76124		0.0619409	0.688		0.0233993	0.86491		0.172771	0.661115		0.33409	0.707115		0.0140984	0.844223		0.130441	0.654073		0.0267252	0.93063		0.382265	0.809018		0.197967	0.797617
0.0459773	0.736521		0.137221	0.77623		0.203635	0.774439		0.0406469	0.769192		0.363795	0.595171		0.0286055	0.765128		0.0131241	0.629629		0.178445	0.699885		0.0469235	0.65689		0.0647528	0.837598		0.083163	0.737825		0.239499	0.715593		0.0768522	0.82024			0.651557		0.00965273	0.938363		0.702479	0.765733		0.21995	0.752949
0.0431725	0.743966		0.0191514	0.737116		0.199935	0.772179		0.129724	0.777313		0.305125	0.619746		0.0749819	0.781415		0.120299	0.504368		0.344177	0.663412		0.123627	0.623819		0.040479	0.845714		0.0186499	0.704289		0.145839	0.72328		0.0952595	0.815161		0.0539383	0.648818		0.00162121	0.940002		0.72084	0.786187		0.235328	0.736771
0.11467	0.793805		0.148639	0.728793		0.0758971	0.86758		0.109484	0.788735		0.361698	0.638625		0.0286885	0.780705		0.105388	0.568016		0.106837	0.762286		0.0790886	0.596597		0.00597649	0.745927		0.0681956	0.710223		0.0478058	0.718827		0.0218137	0.870254		0.128255	0.728841		0.0158153	0.948148		0.757954	0.796594		0.239091	0.764163
0.104685	0.748777		0.151306	0.788494		0.168869	0.863795		0.0638419	0.830974		0.149026	0.596297		0.0543447	0.812019		0.0642331	0.669966		0.0483094	0.699301		0.0901994	0.630837		0.0423254	0.774727		0.147029	0.732353		0.431577	0.702109		0.196343	0.814002			0.722279		0.00200298	0.934368		0.420664	0.819127		0.223086	0.74512
0.02426	0.707117		0.271347	0.7416		0.42204	0.667402		0.124033	0.7903		0.163381	0.784482		0.00752423	0.826214		0.0828684	0.59234		0.0395694	0.748961		0.0270486	0.663451		0.0511371	0.800682		0.0352608	0.635398		0.846705	0.560237		0.0864745	0.829222		0.0177853	0.729637		0.0129418	0.937952		0.547306	0.809911		0.19959	0.78396
0.0100525	0.760527		0.094708	0.816707		0.435516	0.663332		0.160377	0.773716		0.158211	0.67181		0.0135482	0.756181		0.280747	0.489108		0.053125	0.749362		0.0231203	0.63541		0.0319833	0.799519		0.0537717	0.685878		0.353528	0.654665		0.0890011	0.800937		0.176534	0.656698		0.0296001	0.934503		0.75602	0.773684		0.249962	0.72664
0.0759711	0.740024		0.280801	0.816839		0.437792	0.640771		0.149099	0.822627		0.058648	0.746888		0.0193983	0.752664		0.112975	0.630227		0.0666108	0.696945		0.0149162	0.616718		0.0559722	0.789049		0.0317356	0.692967		0.322905	0.665128		0.0830988	0.819537		0.180189	0.734966		7.70371e-05	0.942441		0.767769	0.797766		0.202522	0.761934
0.952902	0.558279		0.749922	0.811568		0.418518	0.673816		0.11706	0.820481		0.25223	0.60038		0.00698498	0.777577		0.0456002	0.66879		0.440448	0.747595		0.0711007	0.710822		0.0176378	0.763142		0.0343873	0.742815		0.322687	0.659423		0.0460095	0.80811		0.346189	0.704673		0.00168073	0.921953		0.449577	0.808023		0.170311	0.757344
0.893584	0.613706		0.658742	0.820094		0.409315	0.656497		0.137618	0.785692		0.0331045	0.712984		0.0608327	0.778569		0.174307	0.489658		0.0382022	0.715209		0.0708757	0.682472		0.00694461	0.787842		0.202597	0.655773		0.253231	0.751522		0.118766	0.753477		0.11697	0.701972		0.0156576	0.934201		0.730187	0.748566		0.145371	0.680913
0.579208	0.708586		0.444723	0.804123		0.421916	0.658261		0.00273003	0.731961		0.261129	0.638536		0.00582845	0.760964		0.208109	0.587113		0.0615266	0.699899		0.0372126	0.673845		0.0182376	0.823578		0.17397	0.660402		0.305535	0.724672		0.00391565	0.825766		0.270456	0.764856		0.0202786	0.931069		0.709353	0.730588		0.19571	0.749082
0.75935	0.657781		0.473058	0.720926		0.172627	0.670514		0.443901	0.739265		0.302895	0.565974		0.19054	0.756423		0.808684	0.477273		0.234928	0.707935		0.185448	0.482701		0.126225	0.731541		0.836902	0.613151		0.316114	0.640079		0.719104	0.743267		1.01601	0.59447		0.0835036	0.794736		0.444263	0.679668		0.297737	0.680433
0.65752	0.667484		0.784914	0.737549		0.225178	0.767399		0.59616	0.735592		0.282079	0.559996		0.171525	0.804142		0.722151	0.506785		0.799655	0.681306		0.0263248	0.589618		0.141826	0.795432		0.807489	0.596638		0.20278	0.681052		0.32703	0.795174		1.04356	0.594325		0.084407	0.77991		0.0220552	0.80034		0.320686	0.702747
0.374967	0.698495		0.707984	0.763656		0.0910483	0.801035		0.494315	0.759701		0.0321031	0.619898		0.122599	0.789402		0.634636	0.490104		0.265408	0.720005		0.0808721	0.555227		0.149104	0.801519		0.782853	0.597322		0.0829998	0.716504		0.255674	0.770202		0.96077	0.580287		0.104736	0.769419		0.110027	0.781283		0.323151	0.727577
0.378172	0.758878		0.423216	0.766411		0.138434	0.747856		0.287576	0.730786		0.149585	0.545638		0.108884	0.712202		0.573599	0.455921		0.171692	0.714437		0.00639541	0.486736		0.164023	0.822044		0.774077	0.594185		0.219793	0.692788		0.128129	0.792275		0.934843	0.562112		0.135689	0.776978		0.11284	0.777627		0.320005	0.703307
0.488559	0.713995		0.0732052	0.753052		0.264658	0.666994		0.327144	0.701089		0.0765675	0.584505		0.131167	0.790927		0.597812	0.476303		0.347692	0.746447		0.207202	0.527752		0.173712	0.786075		0.784308	0.589369		0.140586	0.71917		0.147617	0.749649		0.666494	0.453734		0.127375	0.768486		0.147396	0.800822		0.328552	0.718511
0.385998	0.723098		0.0660628	0.784167		0.284584	0.631356		0.323109	0.723262		0.353162	0.588345		0.0479665	0.703044		0.600595	0.480896		0.538967	0.715496		0.363994	0.55845		0.147875	0.775114		0.607173	0.592871		0.0462476	0.730561		0.0753011	0.765248		1.07864	0.583109		0.0757428	0.799625		0.226747	0.770468		0.325092	0.716505
0.368929	0.737391		0.160417	0.778826		0.309691	0.56058		0.571486	0.727319		0.257181	0.472952		0.141249	0.789577		0.580222	0.47641		0.513865	0.691907		0.33134	0.626203		0.157562	0.803573		0.776844	0.573933		0.266132	0.697311		0.119835	0.772108		1.05229	0.588886		0.0453885	0.824657		0.207835	0.784842		0.324889	0.728872
0.346893	0.739148		0.0773631	0.770979		0.280516	0.650087		0.503175	0.718545		0.142582	0.690645		0.0710225	0.66594		0.586756	0.469482		0.684662	0.695438		0.252198	0.639388		0.175815	0.814332		0.487869	0.586067		0.148794	0.675512		0.284526	0.790368		0.628687	0.48141		0.0683201	0.806225		0.214862	0.824758		0.235013	0.734087
0.620336	0.648843		0.0993148	0.771092		0.207206	0.596869		0.431921	0.755273		0.0446339	0.763659		0.0380483	0.731091		0.584776	0.472143		0.24825	0.718512		0.21735	0.66167		0.180123	0.819884		0.758475	0.579107		0.119617	0.664084		0.285878	0.799266		0.728921	0.556078		0.108575	0.82838		0.313913	0.758767		0.252735	0.739632
0.58438	0.665571		0.0563656	0.723097		0.22787	0.80988		0.41406	0.748169		0.277691	0.582685		0.0512875	0.741443		0.596572	0.481095		0.229924	0.745009		0.167817	0.647203		0.156578	0.801562		0.45291	0.576961		0.247198	0.688169		0.0632078	0.7699		0.452077	0.52712		0.102931	0.793001		0.202862	0.814548		0.31122	0.694639
0.392227	0.697359		0.0593542	0.778437		0.0410493	0.7988		0.413192	0.718405		0.231235	0.460294		0.0863211	0.678455		0.588935	0.461127		0.431969	0.711155		0.13911	0.617818		0.160069	0.811308		0.57369	0.569305		0.184393	0.674293		0.111136	0.802308		0.37745	0.548341		0.0796029	0.763015		0.174602	0.796938		0.348181	0.683904
0.331992	0.733359		0.342258	0.732605		0.291104	0.653275		0.414612	0.666509		0.100286	0.610533		0.0345936	0.747941		0.508577	0.477615		0.609345	0.680167		0.213094	0.651159		0.141461	0.779145		0.586737	0.536827		0.15081	0.697083		0.0412554	0.790648		0.347397	0.598079		0.100684	0.824894		0.149857	0.784432		0.43869	0.696369
0.385927	0.705137		0.513271	0.760983		0.211936	0.661664		0.40861	0.717652		0.253198	0.606758		0.0393719	0.724927		0.521631	0.450269		0.178377	0.725035		0.20395	0.694135		0.144944	0.797935		0.535139	0.558186		0.0767676	0.75931		0.120638	0.76876		0.635761	0.607943		0.12288	0.817833		0.144652	0.801731		0.426684	0.67561
0.388345	0.713877		0.104717	0.753429		0.224308	0.65811		0.387842	0.707775		0.273279	0.582195		0.0413458	0.655496		0.526538	0.456634		0.144171	0.698333		0.224912	0.604157		0.118945	0.789428		0.510899	0.581495		0.0568234	0.744644		0.0934697	0.755389		0.825189	0.571694		0.115706	0.828056		0.15446	0.810709		0.365247	0.692301
0.419257	0.695966		0.0142336	0.786754		0.256043	0.644482		0.393633	0.709617		0.0601315	0.652156		0.0270429	0.70753		0.542512	0.447491		0.51526	0.722214		0.240388	0.611151		0.122112	0.821756		0.701073	0.549539		0.259256	0.686597		0.0113447	0.733683		0.607401	0.530274		0.121363	0.816391		0.105653	0.817941		0.347595	0.670341
0.435463	0.685529		0.0320425	0.76608		0.265401	0.602633		0.373958	0.673247		0.0096616	0.637707		0.0257577	0.741911		0.538045	0.468305		0.609956	0.730743		0.215021	0.623099		0.126003	0.796254		0.668846	0.53352		0.593306	0.652802		0.171123	0.762979		0.692906	0.520781		0.12659	0.829788		0.100368	0.814227		0.276293	0.702175
0.377725	0.677363		0.0737332	0.755808		0.285503	0.619721		0.398598	0.662075		0.269304	0.566544		0.0549757	0.766083		0.569824	0.473803		0.143498	0.704322		0.236932	0.629884		0.236553	0.760952		0.435714	0.584364		0.486999	0.652076		0.123842	0.757832		0.803536	0.585942		0.0934818	0.788621		0.143698	0.820786		0.134009	0.753824
0.422793	0.710827		0.0579287	0.789178		0.279789	0.791902		0.348601	0.657276		0.248991	0.618453		0.0266011	0.728006		0.515439	0.457624		0.353707	0.697686		0.19976	0.602809		0.251814	0.790358		0.323693	0.564226		0.30745	0.661157		0.190133	0.749343		0.843416	0.519329		0.0341296	0.820071		0.148824	0.817331		0.233665	0.701758
0.547732	0.648203		0.0510399	0.787812		0.241256	0.800714		0.346745	0.655805		0.0129136	0.657671		0.0613689	0.748704		0.50754	0.467756		0.681806	0.615244		0.214253	0.605444		0.219198	0.797412		0.435303	0.577239		0.184644	0.686937		0.394663	0.775643		0.848792	0.526459		0.0890011	0.840838		0.195748	0.8316		0.220785	0.738565
0.619529	0.586218		0.367188	0.710823		0.0496765	0.74033		0.34062	0.63692		0.0545398	0.679653		0.066412	0.710554		0.490191	0.465922		0.518511	0.629858		0.223823	0.560178		0.163045	0.782371		0.393203	0.540787		0.303683	0.694098		0.0936575	0.788576		0.455273	0.491285		0.102764	0.831676		0.188564	0.834225		0.1636	0.694908
1.0143	0.45586		0.688465	0.736546		0.0370043	0.786535		0.365541	0.63211		0.0242977	0.549273		0.0738503	0.652732		0.454704	0.463741		0.162705	0.673898		0.253799	0.541209		0.120208	0.756804		0.327999	0.559948		0.235763	0.727468		0.0250128	0.768889		0.796766	0.54832		0.0796553	0.804086		0.186248	0.826259		0.181713	0.701619
0.915439	0.553953		0.590874	0.727184		0.0971638	0.745719		0.337359	0.666573		0.0479429	0.574535		0.0977935	0.748983		0.48635	0.443885		0.148207	0.630011		0.244483	0.577794		0.092765	0.767322		0.275267	0.61119		0.114008	0.737519		0.0468446	0.749084		0.631186	0.56313		0.0461328	0.808355		0.177155	0.82388		0.241219	0.714239
0.466625	0.676651		0.263207	0.737523		0.255867	0.666854		0.359898	0.666169		0.159857	0.607781		0.0498097	0.656596		0.642119	0.454191		0.273656	0.694884		0.219862	0.598405		0.0986003	0.773497		0.299971	0.566263		0.124144	0.698282		0.20128	0.794893		0.53273	0.557626		0.000274864	0.685897		0.176154	0.813722		0.221104	0.70829
0.322189	0.697362		0.0822278	0.771595		0.200545	0.697018		0.321416	0.670763		0.0420479	0.644727		0.111001	0.65154		0.747756	0.480056		0.442518	0.661621		0.257821	0.62754		0.101783	0.753918		0.209817	0.597314		0.222535	0.708874		0.0923903	0.728748		0.451308	0.504389		0.127321	0.662416		0.195945	0.819972		0.178632	0.730639
0.30617	0.710292		0.0420003	0.762063		0.213684	0.741966		0.3171	0.650862		0.343837	0.695112		0.257393	0.609894		0.684505	0.446185		0.202921	0.664905		0.259816	0.611757		0.111963	0.783011		0.269575	0.578774		0.0897345	0.659189		0.0123083	0.755705		0.490176	0.497787		0.00112683	0.710167		0.216843	0.815958		0.235429	0.739605
0.289156	0.706203		0.0580708	0.74137		0.275796	0.812197		0.31546	0.642001		0.0570929	0.473552		0.174019	0.670008		0.555211	0.492202		0.501111	0.648892		0.220362	0.634838		0.11998	0.801416		0.444685	0.557835		0.0346608	0.702078		0.00133195	0.776485		0.398258	0.569382		0.0143192	0.79444		0.226198	0.8138		0.208441	0.762815
0.325199	0.697374		0.16927	0.764546		0.0187358	0.771924		0.311462	0.66966		0.253088	0.505422		0.108633	0.762176		0.524833	0.494359		0.603215	0.671704		0.245433	0.621916		0.113315	0.785538		0.698495	0.517359		0.199505	0.665119		0.00777984	0.76737		0.300046	0.554246		0.0281265	0.795743		0.21676	0.808378		0.283614	0.697815
0.674572	0.602318		0.0644679	0.764509		0.220368	0.702055		0.327062	0.663788		0.269166	0.536495		0.0444254	0.713903		0.564361	0.444007		0.232336	0.644746		0.247965	0.620651		0.143094	0.766299		0.731411	0.555599		0.0980966	0.681059		0.100688	0.812506		0.33691	0.576145		0.000881258	0.814769		0.203372	0.8206		0.245899	0.759252
0.502174	0.63351		0.299585	0.734317		0.287109	0.640521		0.334347	0.66843		0.209007	0.579388		0.0068462	0.69906		0.587217	0.436723		0.109636	0.706017		0.243283	0.620878		0.0199436	0.767362		0.677483	0.55844		0.0609567	0.713985		0.443246	0.759111		0.272257	0.573008		0.00897076	0.756169		0.155633	0.792714		0.241537	0.721169
0.330962	0.754951		0.267267	0.707763		0.229269	0.668171		0.296447	0.646525		0.235391	0.564938		0.0614568	0.676085		0.582662	0.405778		0.251616	0.670445		0.263011	0.619993		0.0291916	0.748457		0.684482	0.572978		0.260282	0.720909		0.384371	0.762703		0.278784	0.565085		0.0104849	0.766718		0.163616	0.775151		0.232071	0.71946
0.247045	0.730575		0.143743	0.851083		0.155155	0.872936		0.416459	0.776982		0.0152271	0.680688		0.0323237	0.779683		0.241869	0.481643		0.226379	0.776477		0.125806	0.594695		0.0855264	0.766441		0.111035	0.705277		0.149367	0.701164		0.0179681	0.856932		0.0585534	0.76697		0.00330003	0.83041		0.125295	0.851891		0.119462	0.763448
0.127985	0.670488		0.149504	0.827959		0.0244431	0.890169		0.473403	0.759104		0.196796	0.651514		0.0878723	0.784668		0.193855	0.472355		0.117318	0.724867		0.11238	0.669483		0.0395597	0.817515		0.0652669	0.690272		0.625435	0.670467		0.0182548	0.823932		0.0560442	0.750827		0.00146763	0.896339		0.141644	0.921275		0.193497	0.758128
0.024004	0.808418		0.0431901	0.897127		0.187355	0.811802		0.405629	0.726817		0.0038626	0.666006		0.0681146	0.817065		0.137724	0.579443		0.0105323	0.717551		0.0726729	0.698823		0.0580979	0.844304		0.119314	0.735128		0.190945	0.653549		0.0262746	0.796778		0.175731	0.719388		0.00582577	0.899445		0.120845	0.926214		0.176416	0.759115
0.0072869	0.766566		0.0453523	0.843136		0.0140844	0.898107		0.424613	0.730474		0.0357075	0.738554		0.0398826	0.710014		0.140035	0.593887		0.0121723	0.717671		0.018188	0.690143		0.0276831	0.849569		0.0672891	0.758949		0.596768	0.670656		0.00212381	0.820452		0.0774177	0.68465		0.00373408	0.894335		0.0440274	0.904008		0.0733028	0.786863
0.0421763	0.751767		0.0484212	0.824743		0.057374	0.835882		0.285642	0.786498		0.0610251	0.691269		0.0628897	0.802345		0.168749	0.550701		0.0392905	0.699195		0.0132751	0.691344		0.003222	0.846851		0.00778132	0.761653		0.323014	0.649846		0.0195583	0.812213		0.0348793	0.710802		0.0111298	0.905255		0.314086	0.845292		0.0835135	0.76815
0.0281075	0.723235		0.0181225	0.823717		0.00878791	0.897345		0.0569184	0.791637		0.14147	0.643474		0.00587507	0.790205		0.00283379	0.777722		0.0813338	0.729745		0.00131822	0.677529		0.0106946	0.853519		0.0867937	0.756332		0.0709965	0.70061		0.0792092	0.867114		0.02088	0.759593		0.00661489	0.896408		0.525072	0.822809		0.164518	0.755183
0.0932276	0.729205		0.12731	0.820476		0.166609	0.833391		0.0230124	0.769327		0.00401818	0.783043		0.064081	0.790932		0.162844	0.626063		0.0422717	0.701334		0.0246394	0.67155		0.0284872	0.861786		0.0524491	0.722045		0.0884863	0.721247		0.228916	0.811582		0.0141416	0.681553		0.00891453	0.902145		0.571931	0.807187		0.156447	0.787322
0.0177511	0.755699		0.144732	0.863497		0.00487918	0.91774		0.0355324	0.765259		0.140699	0.685371		0.0501338	0.816256		0.383505	0.517524		0.474055	0.745736		0.0367854	0.696842		0.0198997	0.859519		0.149611	0.691339		0.0460158	0.744695		0.352952	0.828665		0.0208662	0.750792		0.00335948	0.920678		0.459943	0.820099		0.162787	0.746749
0.0366838	0.748277		0.00989477	0.80589		0.266493	0.716346		0.0469896	0.776899		0.138876	0.720704		0.00978571	0.758591		0.343646	0.475987		0.0242455	0.749215		0.0941942	0.761653		0.0220337	0.87828		0.0790802	0.712997		0.0245532	0.705428		0.310201	0.832831		0.0576196	0.682101		0.0237742	0.9275		0.524521	0.819341		0.0695896	0.780691
0.0185296	0.755626		0.0723621	0.851954		0.107175	0.889344		0.0582719	0.787214		0.259609	0.626771		0.0299307	0.799806		0.201377	0.4952		0.0120354	0.720251		0.0286083	0.844179		0.0316575	0.842485		0.0415283	0.729319		0.172511	0.742779		0.022937	0.816758		0.0773281	0.664463		0.0167163	0.933033		0.591763	0.792971		0.00978399	0.755345
0.0528643	0.77572		0.035558	0.805461		0.12835	0.82406		0.0160582	0.777849		0.0265963	0.725656		0.00647473	0.795515		0.23867	0.53497		0.0366566	0.766683		0.0502033	0.834784		0.0215517	0.865879		0.0873649	0.654811		0.00638669	0.673811		0.0259757	0.827125		0.0697998	0.740417		0.00532697	0.934778		0.539014	0.826369		0.120895	0.795257
0.0504881	0.739851		0.241315	0.817718		0.315375	0.696276		0.0542318	0.792494		0.148242	0.646547		0.0146059	0.811928		0.104829	0.611214		0.100564	0.678795		0.0915569	0.74932		0.00537048	0.841452		0.0959432	0.72772		0.0661686	0.778466		0.0131945	0.836467		0.0133407	0.749814		0.0233521	0.947376		0.600444	0.803781		0.145793	0.769793
0.0601059	0.730086		0.0847771	0.842277		0.0635654	0.79568		0.0354997	0.802802		0.0676531	0.660251		0.0353269	0.760334		0.0752576	0.694025		0.105686	0.750114		0.0768522	0.769822		0.0168143	0.845025		0.183641	0.717342		0.00810136	0.753072		0.0876811	0.787634		0.0041449	0.69915		0.00962311	0.950358		0.579588	0.814943		0.062367	0.792175
0.0068133	0.76632		0.177492	0.783948		0.046308	0.899875		0.101501	0.742658		0.201329	0.701799		0.0119787	0.788046		0.175234	0.531088		0.0521151	0.746321		0.13676	0.6452		0.0232345	0.851086		0.0564106	0.737082		0.25578	0.717082		0.020378	0.825288		0.0169719	0.784798		0.00482614	0.943596		0.109007	0.914539		0.147812	0.807975
0			0			0			0			0			0			0			0			0			0			0			0			0			0			0			0			0
0.0472406	0.732831		0.0693685	0.864351		0.0605341	0.857053		0.00927294	0.780114		0.141789	0.708458		0.00472068	0.78448		0.0941344	0.689125		0.0434491	0.744763		0.0625032	0.803175		0.0363258	0.846555		0.0581045	0.753748		0.127265	0.721682		0.0522953	0.838223		0.0421076	0.737682		0.00207744	0.944171		0.048885	0.94203		0.0284272	0.76928
0.0352205	0.724152		0.14493	0.857285		0.20555	0.837444		0.0360924	0.797596		0.0664806	0.565627		0.0355054	0.8109		0.0824379	0.647745		0.0240768	0.742392		0.0528931	0.821064		0.0317841	0.860734		0.109628	0.756299		0.0708065	0.721172		0.0571681	0.815817		0.0970744	0.673181		0.0162328	0.940877		0.44654	0.781087		0.0591384	0.799705
0.0132825	0.750244		0.327912	0.816502		0.376651	0.682211		0.0287448	0.764593		0.0502266	0.781579		0.0212842	0.754042		0.34017	0.530858		0.209579	0.691064		0.0487783	0.796103		0.0127266	0.836103		0.0450669	0.716687		0.493408	0.660427		0.0777946	0.755332		0.0284962	0.756651		0.000409977	0.94504		0.423738	0.802645		0.0630441	0.78354
0.008879	0.800866		0.111552	0.837973		0.2003	0.690564		0.256522	0.76518		0.0585862	0.691439		0.0388281	0.739936		0.227533	0.55296		0.0115762	0.750409		0.0778186	0.839261		0.0108379	0.865793		0.0668098	0.696263		0.088667	0.688672		0.378455	0.820169		0.0336139	0.683265		0.0128183	0.945138		0.51445	0.845886		0.0755547	0.739145
0.000216071	0.706333		0.239916	0.747617		0.0976533	0.892338		0.0412518	0.827246		0.158859	0.753604		0.0223086	0.748528		0.0951479	0.637897		0.0750973	0.773366		0.0748196	0.808533		0.000164786	0.855628		0.116361	0.635064		0.0783099	0.724136		0.0344764	0.831608		0.113469	0.677273		0.0315513	0.935148		0.273259	0.822351		0.0501551	0.772196
0.0527907	0.75332		0.314713	0.715798		0.157327	0.823651		0.0608542	0.789886		0.162466	0.672011		0.0166267	0.775603		0.16211	0.578484		0.126329	0.727137		0.089837	0.810717		0.0415183	0.864494		0.139574	0.731599		0.0162807	0.763366		0.0564742	0.807667			0.708272		0.0144789	0.934012		0.593472	0.777137		0.0721374	0.753749
0.0499858	0.729271		0.15834	0.719675		0.153627	0.801879		0.0282233	0.796333		0.103796	0.702102		0.0630032	0.746443		0.054935	0.737494		0.292062	0.736415		0.0131331	0.734645		0.0172445	0.823641		0.0750605	0.681953		0.109941	0.730629		0.0748815	0.809199		0.0709103	0.672964		0.00320493	0.94353		0.611833	0.804295		0.0875155	0.741662
0.121483	0.736326		0.0288529	0.773058		0.0295891	0.863533		0.00798278	0.800518		0.160368	0.737582		0.0406672	0.826518		0.069846	0.750248		0.0547216	0.747967		0.0576719	0.81227		0.017258	0.73751		0.124606	0.694281		0.303586	0.709071		0.0014357	0.838025		0.111283	0.707033		0.0206414	0.936825		0.648947	0.803928		0.0912792	0.756319
0.111499	0.743003		0.0261854	0.822813		0.122561	0.847225		0.0376592	0.792961		0.0523033	0.703048		0.0663234	0.793965		0.239467	0.51642		0.100425	0.6966		0.0465611	0.824389		0.0655599	0.777734		0.0906188	0.678463		0.175797	0.751966		0.216721	0.81832			0.783721		0.00282316	0.942712		0.311658	0.834879		0.0752738	0.725415
0.0310733	0.705701		0.093855	0.832552		0.375732	0.643983		0.0225318	0.76882		0.037948	0.748463		0.019503	0.764922		0.0923655	0.57718		0.0916846	0.740337		0.109712	0.808569		0.0743717	0.78855		0.0916715	0.664953		0.590925	0.653683		0.106852	0.84691		0.0347572	0.681086		0.0177679	0.929281		0.438299	0.830204		0.0517776	0.753986
0.0168659	0.710164		0.0827837	0.776394		0.389208	0.635457		0.0588757	0.769038		0.0431181	0.710736		0.00156947	0.777039		0.105513	0.806245		0.00100984	0.716682		0.11364	0.780885		0.0552178	0.788258		0.00263896	0.670673		0.097748	0.689884		0.0686231	0.814944		0.159562	0.652973		0.0344263	0.923814		0.647014	0.775685		0.102149	0.746777
0.0827844	0.720359		0.458293	0.789041		0.391484	0.612053		0.0475976	0.782697		0.259977	0.725881		0.00741957	0.717265		0.288209	0.522977		0.118726	0.698006		0.121844	0.767188		0.0792068	0.781821		0.0246751	0.691837		0.0671247	0.696162		0.0627208	0.816097		0.197161	0.746098		0.00474911	0.937685		0.658763	0.805308		0.0547094	0.741083
0.946089	0.539578		0.927414	0.758424		0.37221	0.677256		0.0155589	0.772126		0.0509008	0.728294		0.0189637	0.767593		0.129634	0.641702		0.388332	0.757967		0.0656598	0.782766		0.0408724	0.772279		0.0907979	0.711858		0.066907	0.729492		0.0256315	0.795705		0.329217	0.678517		0.00650688	0.927988		0.340571	0.815889		0.0224991	0.744402
0.886771	0.5817		0.836234	0.773254		0.363007	0.681211		0.0361167	0.790957		0.168225	0.768312		0.0728114	0.789072		0.000927001	0.810101		0.0139129	0.686153		0.0658848	0.811166		0.0162899	0.830873		0.146187	0.683356		0.0025495	0.72625		0.0983881	0.777379		0.0999985	0.736348		0.0204837	0.937972		0.62118	0.775369		0.0024412	0.690648
0.572395	0.685016		0.622214	0.755132		0.375608	0.625838		0.0987711	0.735144		0.0597995	0.664816		0.0178072	0.743762		0.383342	0.541185		0.0094115	0.705046		0.0995479	0.788368		0.00499689	0.846496		0.230381	0.649151		0.0497551	0.70311		0.0242936	0.819281		0.253484	0.766189		0.0251048	0.93032		0.600346	0.740775		0.0478982	0.741833
0.752537	0.675858		0.65055	0.691601		0.218935	0.649714		0.545402	0.676706		0.101566	0.62226		0.202519	0.741989		0.983918	0.585942		0.182813	0.71375		0.0486875	0.63877		0.102991	0.748028		0.893313	0.588872		0.0603338	0.728905		0.739482	0.693527		0.999035	0.611463		0.0883298	0.787769		0.335256	0.692829		0.149924	0.696199
0.650707	0.660628		0.962406	0.735792		0.271486	0.734684		0.697661	0.649578		0.0807492	0.633899		0.183503	0.751575		0.897385	0.60139		0.747539	0.71865		0.110436	0.639992		0.118591	0.819132		0.863899	0.612882		0.0529999	0.693172		0.347408	0.801433		1.02659	0.637499		0.0892331	0.778482		0.0869514	0.799818		0.172874	0.707179
0.368154	0.683921		0.885475	0.704903		0.137356	0.775882		0.595816	0.681792		0.169226	0.625116		0.134578	0.77764		0.80987	0.594595		0.213293	0.745656		0.217633	0.579991		0.125869	0.822589		0.839263	0.576949		0.17278	0.689945		0.276052	0.761		0.943798	0.592513		0.109562	0.769869		0.00102015	0.782393		0.175339	0.716113
0.371359	0.732572		0.600708	0.720389		0.092126	0.735893		0.389077	0.693996		0.0517439	0.64058		0.120862	0.742515		0.748833	0.573913		0.119576	0.737755		0.143156	0.611036		0.140788	0.809342		0.830488	0.589221		0.0359873	0.720408		0.148507	0.799253		0.917871	0.586698		0.140516	0.780624		0.00383333	0.780218		0.172193	0.708688
0.481746	0.680389		0.250697	0.738704		0.218351	0.653993		0.428645	0.638341		0.124762	0.646244		0.143146	0.723001		0.773046	0.606738		0.295577	0.705191		0.0704413	0.682238		0.150477	0.802913		0.840719	0.57454		0.115194	0.774343		0.167995	0.749155		0.649522	0.517562		0.132201	0.749196		0.0383895	0.819043		0.18074	0.724308
0.379185	0.711703		0.243555	0.747506		0.238276	0.624432		0.42461	0.691629		0.151833	0.667888		0.0599452	0.697256		0.775829	0.591166		0.486852	0.730583		0.227234	0.698716		0.124641	0.810894		0.663584	0.556807		0.209533	0.688204		0.0956791	0.769723		1.06167	0.604671		0.0805689	0.788972		0.117741	0.799613		0.17728	0.714242
0.362116	0.716568		0.337909	0.729848		0.263383	0.555763		0.672987	0.664401		0.0558514	0.561336		0.153228	0.749708		0.755456	0.583904		0.461749	0.696378		0.19458	0.788922		0.134327	0.851301		0.833254	0.589272		0.0103518	0.760695		0.140213	0.769709		1.03532	0.611599		0.0502146	0.821461		0.098828	0.786965		0.177077	0.719864
0.34008	0.734275		0.254855	0.721682		0.234208	0.655643		0.604676	0.709248		0.0587473	0.703072		0.0830013	0.697939		0.761989	0.596826		0.632547	0.722047		0.115438	0.801879		0.152581	0.817454		0.54428	0.580293		0.106986	0.691343		0.304904	0.794996		0.611715	0.519822		0.0731462	0.809528		0.105855	0.829263		0.0872004	0.751166
0.613523	0.638603		0.276807	0.723591		0.160898	0.595389		0.533422	0.673285		0.156695	0.54982		0.0500271	0.689001		0.76001	0.578067		0.196135	0.750828		0.0805897	0.764782		0.156889	0.815227		0.814886	0.579339		0.375397	0.69389		0.306256	0.784871		0.711949	0.586105		0.113401	0.812576		0.204907	0.769273		0.104923	0.746758
0.577567	0.644593		0.233857	0.71113		0.274177	0.767715		0.515561	0.671285		0.0763618	0.698452		0.0393087	0.698488		0.771806	0.607353		0.177809	0.751328		0.0310568	0.768203		0.133343	0.820918		0.50932	0.55185		0.00858241	0.740128		0.0835858	0.76707		0.435105	0.521109		0.107757	0.779085		0.0938552	0.835376		0.163408	0.703433
0.385414	0.686455		0.236846	0.729782		0.0873573	0.781951		0.514694	0.69768		0.0299058	0.532245		0.0743423	0.631939		0.764169	0.590254		0.379854	0.683165		0.00234992	0.776441		0.136835	0.826587		0.6301	0.560662		0.0713867	0.739275		0.131514	0.79186		0.360478	0.570442		0.0844291	0.770498		0.0655955	0.820748		0.200369	0.687902
0.325179	0.708322		0.51975	0.713119		0.244796	0.658759		0.516113	0.72107		0.301615	0.563381		0.0465724	0.664802		0.683811	0.587628		0.55723	0.729165		0.0763336	0.791377		0.118226	0.815291		0.643148	0.51489		0.10497	0.677021		0.0616334	0.7353		0.330425	0.587835		0.10551	0.815831		0.0408505	0.814313		0.290878	0.72312
0.379113	0.684424		0.690763	0.699327		0.165628	0.672291		0.510111	0.69536		0.0518691	0.719043		0.0513506	0.711563		0.696865	0.589355		0.126262	0.726137		0.0671895	0.773871		0.12171	0.818879		0.59155	0.542113		0.332548	0.688654		0.141016	0.784486		0.618789	0.647853		0.127706	0.817383		0.0356458	0.823603		0.278872	0.692776
0.381531	0.63407		0.282208	0.720576		0.178	0.662904		0.489343	0.731456		0.0719493	0.745953		0.0293671	0.625384		0.701772	0.586739		0.0920561	0.754472		0.0881517	0.748105		0.095711	0.831413		0.56731	0.573817		0.312603	0.705305		0.113848	0.77051		0.808217	0.584104		0.120532	0.825103		0.0454534	0.832166		0.217435	0.702037
0.412443	0.624112		0.191725	0.724236		0.209735	0.636236		0.495134	0.735306		0.141198	0.525785		0.0390216	0.726653		0.717746	0.576745		0.463144	0.734258		0.103627	0.732391		0.0988775	0.835259		0.757483	0.519683		0.00347624	0.688188		0.0317227	0.758992		0.590429	0.516121		0.126189	0.8061		0.00335365	0.804158		0.199783	0.685387
0.428649	0.673822		0.209534	0.747685		0.219093	0.577458		0.475459	0.702946		0.191668	0.69697		0.0377364	0.732221		0.713279	0.567147		0.557841	0.75068		0.0782609	0.738151		0.102769	0.833534		0.725257	0.547371		0.337526	0.710094		0.191501	0.789976		0.675934	0.494811		0.131416	0.822272		0.00863817	0.830249		0.128481	0.688676
0.370912	0.67188		0.251225	0.745974		0.239195	0.61233		0.5001	0.687889		0.067975	0.676299		0.0669544	0.758148		0.745058	0.599204		0.0913827	0.727012		0.100172	0.733412		0.213319	0.793793		0.492125	0.557407		0.231219	0.718822		0.14422	0.750992		0.786564	0.633833		0.098308	0.773743		0.034691	0.836856		0.0138029	0.713402
0.41598	0.709826		0.23542	0.741162		0.326097	0.750952		0.450103	0.684056		0.0476621	0.715999		0.0146224	0.695266		0.690673	0.581292		0.301591	0.701919		0.0629998	0.755878		0.228579	0.840727		0.380104	0.528765		0.0516696	0.738431		0.210511	0.760434		0.826444	0.571004		0.0389558	0.811473		0.0398172	0.842397		0.0858531	0.711897
0.540919	0.633042		0.228532	0.751964		0.287564	0.758424		0.448246	0.6664		0.188416	0.514569		0.0733477	0.69484		0.682774	0.573826		0.629691	0.644622		0.0774929	0.731147		0.195964	0.819475		0.491714	0.545856		0.0711358	0.742867		0.415041	0.79621		0.83182	0.514144		0.0938272	0.841015		0.0867413	0.845548		0.0729728	0.716915
0.612715	0.584879		0.54468	0.698609		0.0959845	0.747389		0.442121	0.668635		0.255869	0.634885		0.0783907	0.764808		0.665425	0.582439		0.466395	0.660359		0.087062	0.716158		0.13981	0.814408		0.449613	0.548179		0.0479028	0.736429		0.114036	0.785297		0.438301	0.501516		0.10759	0.833889		0.079557	0.835214		0.0157877	0.673027
1.00749	0.416307		0.865957	0.712176		0.00930366	0.790454		0.467043	0.67101		0.177032	0.736118		0.0618716	0.682698		0.629938	0.559799		0.11059	0.666615		0.117039	0.676796		0.096974	0.798894		0.38441	0.561795		0.0200175	0.75512		0.0453908	0.779389		0.779794	0.579803		0.0844814	0.791365		0.077241	0.836061		0.0339005	0.734431
0.908626	0.520375		0.768366	0.684966		0.0508558	0.737544		0.43886	0.688675		0.249272	0.599716		0.109772	0.729758		0.661583	0.575486		0.096092	0.664292		0.107723	0.68398		0.0695305	0.806899		0.331678	0.550483		0.141772	0.733916		0.0672226	0.73662		0.614214	0.55776		0.050959	0.804508		0.0681484	0.825863		0.0934066	0.714524
0.459812	0.628132		0.440699	0.675623		0.209559	0.667234		0.461399	0.662075		0.0414724	0.656088		0.0378309	0.683587		0.817353	0.568929		0.221541	0.731247		0.0831018	0.752558		0.0753657	0.791252		0.356382	0.545123		0.379924	0.696322		0.221658	0.773668		0.515758	0.539088		0.00510101	0.714713		0.0671477	0.832713		0.073292	0.693404
0.315376	0.679876		0.259719	0.739602		0.154238	0.678082		0.422917	0.678525		0.159281	0.561423		0.0990218	0.623331		0.92299	0.57593		0.390403	0.684578		0.12106	0.713418		0.0785482	0.801971		0.266227	0.574542		0.0332446	0.758131		0.112768	0.728532		0.434336	0.50468		0.122495	0.65638		0.0869388	0.831		0.03082	0.701027
0.299357	0.696661		0.219492	0.753083		0.259992	0.711094		0.418601	0.676586		0.545166	0.606153		0.245415	0.620303		0.859739	0.570449		0.150806	0.699796		0.123055	0.778885		0.0887288	0.799267		0.325986	0.532327		0.166046	0.696608		0.0326863	0.76561		0.473204	0.51692		0.00595297	0.701589		0.107837	0.81714		0.0876166	0.737935
0.282342	0.717696		0.235563	0.730122		0.322104	0.773866		0.416961	0.65594		0.258422	0.47147		0.16204	0.642647		0.730445	0.582463		0.448996	0.671087		0.0836018	0.74828		0.0967456	0.807625		0.501096	0.554967		0.221119	0.714859		0.019046	0.757755		0.381286	0.587133		0.0191454	0.782136		0.117192	0.823679		0.0606291	0.708016
0.318386	0.672782		0.346762	0.724087		0.0275721	0.779181		0.412963	0.678507		0.0517586	0.618934		0.120612	0.767543		0.700066	0.575043		0.5511	0.705422		0.108673	0.753135		0.0900809	0.801616		0.754906	0.540903		0.0562755	0.727732		0.0281578	0.771379		0.283074	0.591425		0.0329527	0.805147		0.107753	0.812886		0.135802	0.683666
0.667759	0.603352		0.24196	0.72284		0.17406	0.71076		0.428563	0.67098		0.0678369	0.668575		0.0564041	0.736797		0.739595	0.554338		0.180221	0.677053		0.111204	0.75663		0.119859	0.782927		0.787821	0.553668		0.157683	0.701573		0.121066	0.774617		0.319938	0.576606		0.00394488	0.818729		0.094365	0.818576		0.0980872	0.766933
0.495361	0.586699		0.477076	0.680601		0.240801	0.638619		0.435848	0.68899		0.00767811	0.689755		0.00513254	0.676846		0.762451	0.555907		0.0575211	0.723556		0.106522	0.750516		0.00329094	0.77847		0.733893	0.527063		0.316737	0.656325		0.463624	0.755828		0.255285	0.596792		0.0137969	0.765629		0.046626	0.796195		0.0937253	0.723346
0.324148	0.713609		0.444759	0.687144		0.182961	0.672278		0.397948	0.665663		0.0340613	0.64687		0.049478	0.645563		0.757896	0.554675		0.199501	0.701673		0.12625	0.754896		0.00595708	0.762421		0.740893	0.53		0.00450228	0.741267		0.404749	0.749315		0.261812	0.56327		0.00565873	0.772978		0.0546096	0.801493		0.084259	0.710083
0.294285	0.693632		0.0743742	0.840083		0.215689	0.808252		0.425732	0.759884		0.126562	0.612232		0.0370444	0.78843		0.147735	0.560612		0.269828	0.761826		0.18831	0.50123		0.121852	0.853568		0.169139	0.745693		0.276633	0.634725		0.0702633	0.833906		0.100661	0.71418		0.00122258	0.824783		0.0764101	0.838601		0.147889	0.761189
0.175225	0.711791		0.0801351	0.848364		0.0849772	0.851112		0.482676	0.760788		0.338585	0.605785		0.092593	0.782955		0.0997206	0.573857		0.160767	0.756451		0.174883	0.670561		0.0758855	0.876919		0.123371	0.759643		0.7527	0.605437		0.07055	0.835344		0.0981518	0.715032		0.000609813	0.884645		0.190529	0.916384		0.221924	0.770805
0.0712446	0.749075		0.0261784	0.887599		0.126821	0.795974		0.414902	0.714101		0.137926	0.725158		0.0728353	0.775961		0.0435892	0.642194		0.0329168	0.716638		0.135176	0.738117		0.0944237	0.884174		0.177419	0.733455		0.31821	0.573611		0.0260207	0.790686		0.217839	0.681549		0.00790321	0.894515		0.16973	0.921088		0.204843	0.751864
0.0399537	0.738916		0.0240162	0.88673		0.0464498	0.823827		0.433886	0.739533		0.106082	0.783954		0.0351619	0.746146		0.0459005	0.506423		0.0312768	0.752157		0.0806912	0.735729		0.0640089	0.851198		0.125394	0.763406		0.724033	0.641893		0.0501715	0.823699		0.119525	0.693623		0.00165664	0.880388		0.0929124	0.904249		0.10173	0.707385
0.0894169	0.689414		0.11779	0.806856		0.0031601	0.811925		0.294915	0.75013		0.0807639	0.776394		0.0676104	0.770851		0.074615	0.661923		0.0041586	0.686684		0.0492281	0.717475		0.0395478	0.879335		0.0658858	0.725592		0.450279	0.566907		0.032737	0.870021		0.00722825	0.759586		0.00905237	0.905219		0.265201	0.851602		0.0550862	0.755661
0.0753481	0.745329		0.087491	0.820678		0.069322	0.83285		0.0661914	0.810147		0.283259	0.613987		0.00115439	0.781702		0.0969682	0.670634		0.0378847	0.737462		0.0638214	0.704219		0.0470204	0.857584		0.144898	0.745736		0.198262	0.598333		0.026914	0.89029		0.0212276	0.73159		0.00869233	0.902938		0.476187	0.836053		0.192945	0.774914
0.140468	0.712014		0.0579417	0.789516		0.106075	0.810116		0.0137394	0.787832		0.145807	0.71442		0.0688017	0.783818		0.06871	0.744973		0.0857208	0.734136		0.0378638	0.695238		0.0648131	0.875342		0.00565532	0.792524		0.215751	0.67156		0.176621	0.825857		0.0562492	0.767565		0.010992	0.910575		0.523046	0.809255		0.184874	0.763079
0.0649917	0.695357		0.0753632	0.885217		0.0654133	0.851448		0.0262595	0.786969		0.00108989	0.687075		0.0548545	0.805352		0.28937	0.606035		0.517504	0.741473		0.0257178	0.736672		0.0562255	0.85595		0.0915069	0.764097		0.173281	0.669696		0.300657	0.804262		0.0629738	0.781787		0.00543692	0.919714		0.411058	0.830823		0.191214	0.761694
0.0105568	0.79086		0.0594737	0.76911		0.205959	0.691431		0.0377166	0.794372		0.00291342	0.756498		0.0145064	0.738458		0.249512	0.597566		0.0676946	0.74047		0.031691	0.765132		0.0583595	0.85173		0.137185	0.701331		0.102712	0.753361		0.257906	0.820656		0.0997272	0.68268		0.0216967	0.914154		0.475636	0.824379		0.0980168	0.784746
0.0657702	0.696432		0.141731	0.838644		0.167709	0.858312		0.048999	0.793981		0.401398	0.653222		0.0346514	0.775782		0.107242	0.558015		0.0314137	0.722025		0.0338949	0.845815		0.0679833	0.848576		0.0996328	0.7396		0.299776	0.663169		0.0752323	0.842273		0.119436	0.655584		0.0187938	0.939028		0.542878	0.787593		0.0186432	0.711968
0.00562372	0.737004		0.0338105	0.788145		0.0678159	0.842117		0.0253311	0.803689		0.115193	0.735557		0.0111954	0.767403		0.144535	0.58577		0.00679251	0.779528		0.0122999	0.837529		0.0578775	0.890031		0.0292605	0.719875		0.133652	0.630616		0.0782709	0.858544		0.0276922	0.747871		0.00740442	0.921375		0.490129	0.8303		0.0924679	0.735147
0.00324751	0.742355		0.171947	0.815786		0.254841	0.681428		0.0449589	0.784241		0.290031	0.608633		0.00988517	0.808859		0.0106944	0.628247		0.0571148	0.712394		0.0290537	0.821115		0.0416963	0.840697		0.0378387	0.696757		0.0610964	0.726627		0.0654897	0.860376		0.0287668	0.712383		0.0254295	0.950542		0.551559	0.808975		0.117366	0.79779
0.107347	0.710067		0.0154086	0.821046		0.0030313	0.746941		0.0262268	0.763632		0.209442	0.710584		0.0400476	0.775814		0.0188769	0.695295		0.0622366	0.778679		0.014349	0.773723		0.0195116	0.851904		0.241745	0.719038		0.135366	0.707955		0.139976	0.810781		0.0462525	0.744404		0.0117006	0.954914		0.530703	0.800294		0.0339397	0.778492
0.0404273	0.713457		0.108123	0.776573		0.106842	0.867353		0.110774	0.820608		0.343118	0.629439		0.0166994	0.797164		0.0810994	0.548179		0.00866602	0.783054		0.0742573	0.675869		0.0130913	0.844229		0.114515	0.741174		0.128515	0.741369		0.0319173	0.843619		0.0251356	0.734849		0.0027487	0.948671		0.157892	0.907667		0.119385	0.760812
0.0472406	0.732831		0.0693685	0.864351		0.0605341	0.857053		0.00927294	0.780114		0.141789	0.708458		0.00472068	0.78448		0.0941344	0.689125		0.0434491	0.744763		0.0625032	0.803175		0.0363258	0.846555		0.0581045	0.753748		0.127265	0.721682		0.0522953	0.838223		0.0421076	0.737682		0.00207744	0.944171		0.048885	0.94203		0.0284272	0.76928
0			0			0			0			0			0			0			0			0			0			0			0			0			0			0			0			0
0.0824611	0.686317		0.214298	0.784296		0.145016	0.787546		0.0268195	0.767744		0.0753084	0.717738		0.0402261	0.792943		0.0116965	0.529586		0.0193723	0.745684		0.00961013	0.855462		0.00454174	0.849379		0.167732	0.711824		0.0564585	0.737278		0.00487284	0.810078		0.139182	0.706276		0.0141553	0.942746		0.397655	0.800598		0.0307112	0.776219
0.0605231	0.702382		0.258544	0.809452		0.316117	0.679424		0.0194719	0.819548		0.0915624	0.687187		0.0260049	0.743996		0.246035	0.63657		0.253028	0.736864		0.0137249	0.830797		0.0235992	0.888508		0.103171	0.743376		0.620673	0.6051		0.0254994	0.769679		0.0706037	0.691916		0.00166747	0.949168		0.374853	0.795976		0.0914714	0.741465
0.0383616	0.716351		0.0421834	0.832533		0.139766	0.698817		0.265795	0.786292		0.0832029	0.66613		0.0341074	0.778685		0.133398	0.606989		0.0550253	0.747398		0.0153153	0.879086		0.0254879	0.854826		0.124914	0.711614		0.215932	0.660457		0.32616	0.85999		0.00849373	0.712784		0.0107409	0.945822		0.465565	0.851794		0.103982	0.769069
0.0474567	0.730698		0.170548	0.740178		0.158187	0.862478		0.0505247	0.758748		0.01707	0.764946		0.0175879	0.736515		0.0010135	0.613982		0.118546	0.757491		0.0123164	0.834658		0.0364906	0.874338		0.0582561	0.694668		0.205575	0.694096		0.0178189	0.849956		0.155577	0.702114		0.0294739	0.925892		0.224374	0.831879		0.0785823	0.747658
0.00555006	0.697686		0.245344	0.718151		0.0967933	0.802832		0.0701271	0.803939		0.020677	0.717425		0.0119061	0.745654		0.0679753	0.617746		0.169779	0.700318		0.0273338	0.871301		0.0778441	0.852814		0.197678	0.715327		0.110984	0.694439		0.108769	0.85261			0.67311		0.0124014	0.937439		0.544587	0.78474		0.100565	0.774116
0.0027452	0.676539		0.0889718	0.733013		0.0930931	0.802293		0.0189503	0.796637		0.037993	0.75272		0.0582825	0.797334		0.0391995	0.778296		0.335511	0.681465		0.0493701	0.748292		0.0535703	0.897081		0.133165	0.746856		0.0173236	0.757664		0.127177	0.83587		0.0288027	0.677922		0.00112749	0.945524		0.562948	0.810344		0.115943	0.730938
0.0742429	0.726016		0.0405155	0.779469		0.030945	0.829859		0.00129016	0.799567		0.0185793	0.787665		0.0453879	0.81585		0.0242885	0.596907		0.0981707	0.739256		0.00483135	0.790767		0.0190678	0.792198		0.182711	0.683473		0.176321	0.69761		0.053731	0.879347		0.15339	0.767039		0.018564	0.951347		0.600062	0.811355		0.119706	0.730755
0.0642582	0.688544		0.0431831	0.830268		0.0620273	0.795921		0.0469322	0.808025		0.194092	0.687793		0.0710441	0.807299		0.145333	0.654027		0.0569754	0.685209		0.0159422	0.805296		0.0292341	0.822414		0.0325143	0.73196		0.303062	0.677011		0.164425	0.864889			0.749223		0.000745716	0.936479		0.262773	0.831264		0.103701	0.756798
0.0161673	0.686015		0.163224	0.795732		0.315198	0.688008		0.0132589	0.744001		0.179737	0.69373		0.0242237	0.774248		0.00176898	0.558926		0.0482355	0.716336		0.0472087	0.844207		0.0380458	0.844555		0.149776	0.689692		0.71819	0.590634		0.0545572	0.863729		0.00735036	0.784226		0.0156905	0.937629		0.389414	0.83562		0.0802048	0.743214
0.0303747	0.77263		0.0134152	0.769518		0.328674	0.620608		0.0496027	0.743674		0.184907	0.719041		0.00315121	0.770653		0.199647	0.686782		0.044459	0.764747		0.051137	0.825641		0.018892	0.851602		0.0607434	0.708275		0.225013	0.620487		0.120918	0.841724		0.20167	0.707035		0.0323488	0.928882		0.598129	0.780961		0.130577	0.728428
0.0355438	0.716502		0.388924	0.775708		0.33095	0.584661		0.0383247	0.801559		0.401766	0.620334		0.00269889	0.764139		0.194075	0.628896		0.0752768	0.699821		0.059341	0.818454		0.0428809	0.836839		0.0827795	0.737286		0.19439	0.723894		0.115016	0.847148		0.155053	0.73581		0.00267166	0.938197		0.609878	0.798326		0.0831367	0.745541
0.993329	0.537213		0.858045	0.74145		0.311676	0.667548		0.00628596	0.780108		0.0908883	0.741453		0.0236844	0.783255		0.0354992	0.568631		0.431782	0.755006		0.00315657	0.833694		0.00454655	0.774525		0.148902	0.776924		0.194172	0.659921		0.0779268	0.84295		0.371325	0.762281		0.00442943	0.913043		0.291686	0.829626		0.0509263	0.742282
0.934011	0.560393		0.766865	0.749543		0.302473	0.619621		0.0268438	0.783629		0.310014	0.657798		0.0775321	0.811019		0.0932074	0.697864		0.0295362	0.727808		0.00338155	0.876167		0.0200359	0.828805		0.0880821	0.687261		0.124716	0.776258		0.150683	0.776266		0.142106	0.67522		0.0184063	0.939596		0.572295	0.782246		0.025986	0.685164
0.619635	0.642443		0.552846	0.733481		0.315073	0.641179		0.108044	0.763211		0.0819895	0.697035		0.0225279	0.719593		0.289208	0.599301		0.0528606	0.691352		0.0370447	0.883304		0.0313289	0.842229		0.288485	0.619523		0.17702	0.741377		0.0280016	0.866023		0.295592	0.790445		0.0230273	0.930197		0.551462	0.740555		0.0763254	0.743604
0.799778	0.639302		0.581182	0.682413		0.279469	0.602622		0.554675	0.706788		0.0402234	0.632646		0.207239	0.723031		0.889783	0.564229		0.226262	0.738881		0.111191	0.574981		0.139317	0.728192		0.951417	0.59688		0.187599	0.64887		0.687187	0.724316		1.04114	0.666787		0.0862523	0.789305		0.286371	0.700042		0.178352	0.718015
0.697947	0.600009		0.893037	0.719531		0.33202	0.697993		0.706934	0.685906		0.0610398	0.646024		0.188224	0.752719		0.803251	0.577408		0.790989	0.698497		0.0479325	0.657468		0.154917	0.805553		0.922004	0.583317		0.0742652	0.67685		0.295113	0.822027		1.06869	0.687059		0.0871557	0.793693		0.135836	0.811893		0.201301	0.718462
0.415395	0.656617		0.816107	0.69118		0.19789	0.72801		0.605089	0.705704		0.311015	0.563121		0.139299	0.762845		0.715735	0.553439		0.256742	0.733153		0.155129	0.606407		0.162195	0.827695		0.897368	0.566151		0.0455153	0.705501		0.223757	0.790575		0.985905	0.625273		0.107485	0.758382		0.0478648	0.79166		0.203766	0.733002
0.418599	0.666479		0.53134	0.711154		0.0315919	0.702293		0.39835	0.668512		0.193533	0.65514		0.125583	0.733823		0.654698	0.541302		0.163026	0.744259		0.0806527	0.586829		0.177114	0.840854		0.888593	0.566877		0.0912778	0.685178		0.0962113	0.780937		0.959979	0.577762		0.138438	0.771707		0.0450516	0.790135		0.20062	0.706294
0.528987	0.615962		0.181328	0.741698		0.157816	0.636368		0.437918	0.658424		0.266551	0.615967		0.147866	0.775975		0.678911	0.557035		0.339026	0.722002		0.132945	0.644411		0.186803	0.789505		0.898823	0.555361		0.0120712	0.688858		0.115699	0.767956		0.69163	0.535992		0.130124	0.750183		0.0104954	0.830091		0.209167	0.742358
0.426426	0.66901		0.174186	0.753643		0.177742	0.586538		0.433883	0.706546		0.0100435	0.7143		0.0646659	0.705507		0.681695	0.560047		0.530301	0.693794		0.289737	0.693409		0.160966	0.784498		0.721688	0.588207		0.0822675	0.711173		0.0433838	0.745735		1.10378	0.671488		0.0784915	0.790593		0.0688559	0.809116		0.205707	0.738567
0.409356	0.680118		0.26854	0.729085		0.202849	0.532669		0.68226	0.679367		0.0859376	0.6247		0.157948	0.726331		0.661321	0.556939		0.505199	0.685414		0.257083	0.770458		0.170653	0.817945		0.891359	0.572433		0.137617	0.691176		0.0879181	0.785115		1.07742	0.655053		0.0481372	0.81659		0.049943	0.796061		0.205504	0.73286
0.38732	0.685931		0.185486	0.732048		0.173673	0.641812		0.613949	0.688008		0.200536	0.666373		0.0877219	0.676865		0.667855	0.555607		0.675996	0.711112		0.177941	0.826271		0.188906	0.852376		0.602384	0.580647		0.0202787	0.682088		0.252609	0.817321		0.653822	0.545153		0.0710688	0.807989		0.0569701	0.843503		0.115628	0.754582
0.660763	0.614838		0.207438	0.724606		0.100364	0.57507		0.542695	0.71375		0.298484	0.542643		0.0547477	0.729461		0.665875	0.563277		0.239584	0.733987		0.143093	0.77524		0.193215	0.833905		0.87299	0.544021		0.248132	0.688707		0.253961	0.804697		0.754057	0.599668		0.111324	0.81585		0.156022	0.772621		0.13335	0.712992
0.624807	0.60783		0.164489	0.74807		0.334712	0.72998		0.524834	0.697059		0.0654272	0.665304		0.0345881	0.699698		0.677671	0.570533		0.221258	0.763584		0.0935601	0.795491		0.169669	0.798015		0.567425	0.553702		0.118683	0.664229		0.0312906	0.795674		0.477212	0.543067		0.10568	0.78467		0.0449703	0.834807		0.191835	0.705507
0.432655	0.615217		0.167477	0.729484		0.147891	0.726291		0.523967	0.690438		0.111883	0.625035		0.0696216	0.692232		0.670034	0.546791		0.423303	0.69704		0.0648531	0.769363		0.17316	0.80635		0.688205	0.558015		0.0558783	0.679232		0.0792184	0.803149		0.402585	0.589408		0.0823516	0.749677		0.0167106	0.823096		0.228796	0.704614
0.372419	0.67409		0.450382	0.712423		0.184262	0.64438		0.525386	0.638757		0.443404	0.509422		0.051293	0.727862		0.589677	0.54309		0.600679	0.696278		0.138837	0.811883		0.154552	0.781307		0.701252	0.499584		0.022295	0.711661		0.00933811	0.773262		0.372533	0.602028		0.103433	0.826256		0.00803443	0.817183		0.319305	0.705663
0.426354	0.67923		0.621394	0.681369		0.105094	0.620196		0.519384	0.681136		0.0899199	0.697322		0.0560713	0.738728		0.60273	0.536514		0.169711	0.731533		0.129693	0.795777		0.158035	0.81175		0.649654	0.525802		0.205283	0.705747		0.0887208	0.796894		0.660897	0.621074		0.125628	0.813913		0.0132392	0.825547		0.307299	0.701928
0.428772	0.641305		0.21284	0.693666		0.117466	0.640485		0.498616	0.703147		0.0698397	0.66251		0.0246464	0.675665		0.607637	0.533277		0.135505	0.712661		0.150655	0.746174		0.132037	0.836901		0.625414	0.560921		0.185338	0.700359		0.0615525	0.784348		0.850325	0.642135		0.118455	0.818668		0.0034316	0.837797		0.245862	0.712985
0.459684	0.643801		0.122357	0.720154		0.149201	0.602324		0.504407	0.699671		0.282987	0.569556		0.0437423	0.709458		0.623611	0.511233		0.506594	0.713346		0.16613	0.718307		0.135203	0.852178		0.815588	0.517243		0.130741	0.724714		0.0205726	0.772137		0.632537	0.574822		0.124111	0.808059		0.0522386	0.806752		0.22821	0.68913
0.47589	0.604624		0.140166	0.747483		0.158559	0.552079		0.484732	0.659474		0.333457	0.558536		0.0424571	0.753654		0.619144	0.526435		0.60129	0.724391		0.140764	0.706723		0.139095	0.800273		0.783361	0.493394		0.464791	0.620627		0.139205	0.827064		0.718042	0.598357		0.129339	0.822493		0.0575231	0.826341		0.156908	0.699105
0.418153	0.658869		0.181856	0.738422		0.178661	0.597841		0.509372	0.640292		0.073814	0.68268		0.0716751	0.737287		0.650923	0.553155		0.134832	0.696724		0.162675	0.70317		0.249644	0.772479		0.550229	0.520587		0.358484	0.637193		0.0919245	0.760061		0.828671	0.648419		0.0962305	0.788175		0.0141939	0.842302		0.0146243	0.721691
0.463221	0.666192		0.166052	0.719939		0.386631	0.698101		0.459375	0.640395		0.094127	0.673608		0.00990168	0.700844		0.596539	0.546458		0.345041	0.702636		0.125503	0.732014		0.264905	0.809666		0.438208	0.534989		0.178935	0.637782		0.158216	0.808824		0.868551	0.603426		0.0368783	0.814774		0.00906773	0.84201		0.11428	0.717241
0.588159	0.617602		0.159163	0.761489		0.348098	0.714091		0.457519	0.617055		0.330205	0.566436		0.0780684	0.723801		0.588639	0.540306		0.67314	0.611791		0.139996	0.728082		0.23229	0.786099		0.549818	0.555908		0.0561293	0.706931		0.362746	0.801852		0.873928	0.604256		0.0917498	0.83396		0.0378564	0.846175		0.1014	0.731703
0.659956	0.552796		0.475311	0.7108		0.156519	0.704151		0.451394	0.60927		0.397658	0.560043		0.0831114	0.757593		0.571291	0.544149		0.509845	0.624464		0.149565	0.697242		0.176136	0.826283		0.507718	0.540492		0.175168	0.677806		0.0617403	0.814768		0.480409	0.517386		0.105512	0.833264		0.030672	0.835665		0.0442149	0.696649
1.05473	0.433556		0.796589	0.69694		0.0698378	0.774455		0.476316	0.634909		0.318821	0.609908		0.0571509	0.693552		0.535803	0.535413		0.154039	0.690576		0.179542	0.647519		0.1333	0.776666		0.442514	0.529817		0.107248	0.701574		0.00690449	0.80347		0.821902	0.614228		0.082404	0.78919		0.028356	0.834424		0.0623277	0.701508
0.955866	0.509665		0.698998	0.667076		0.00967826	0.681591		0.448133	0.647837		0.391061	0.530843		0.114493	0.745979		0.567449	0.538828		0.139541	0.66282		0.170226	0.66821		0.105856	0.78269		0.389782	0.569518		0.0145066	0.753392		0.0149273	0.770684		0.656321	0.584567		0.0488815	0.797515		0.0192634	0.828574		0.121834	0.75899
0.507053	0.615106		0.37133	0.653275		0.149025	0.670425		0.470672	0.631832		0.183261	0.603998		0.0331103	0.691518		0.723218	0.546139		0.26499	0.708147		0.145605	0.74799		0.111692	0.764069		0.414486	0.536358		0.252659	0.697567		0.169363	0.801782		0.557865	0.545037		0.00302356	0.685638		0.0182628	0.831782		0.101719	0.738721
0.362617	0.65313		0.190351	0.745992		0.0937034	0.667768		0.43219	0.629551		0.30107	0.536951		0.0943012	0.630629		0.828855	0.526105		0.433852	0.672779		0.183563	0.708576		0.114874	0.765802		0.324332	0.588109		0.0940204	0.698374		0.060473	0.76761		0.476444	0.538333		0.124572	0.66569		0.0380538	0.834587		0.0592472	0.71605
0.346597	0.656246		0.150124	0.755053		0.320527	0.685207		0.427874	0.632221		0.686955	0.492176		0.240694	0.62505		0.765605	0.538262		0.194255	0.698619		0.185559	0.754116		0.125055	0.792787		0.38409	0.517925		0.0387805	0.721557		0.019609	0.788334		0.515311	0.572441		0.00387552	0.697376		0.0589517	0.809648		0.116044	0.727481
0.329583	0.681834		0.166194	0.719644		0.382638	0.731128		0.426234	0.607687		0.400211	0.409402		0.15732	0.675481		0.63631	0.557497		0.492445	0.670486		0.146105	0.765994		0.133071	0.782691		0.559201	0.553747		0.0938542	0.725682		0.0332492	0.794732		0.423393	0.616711		0.0170679	0.794112		0.0683068	0.829444		0.0890564	0.717729
0.365626	0.665569		0.277393	0.706347		0.0881062	0.762437		0.422236	0.639265		0.0900304	0.603537		0.125333	0.759977		0.605932	0.532947		0.594549	0.692434		0.171176	0.735266		0.126407	0.752427		0.813011	0.513968		0.0709896	0.683375		0.0241374	0.749311		0.325182	0.600077		0.0308752	0.79323		0.0588682	0.809946		0.164229	0.719862
0.715	0.603239		0.172591	0.727861		0.113526	0.712243		0.437836	0.635814		0.0739521	0.720421		0.0611248	0.744035		0.64546	0.512051		0.22367	0.694953		0.173708	0.771575		0.156185	0.736159		0.845926	0.529967		0.0304185	0.677317		0.0687711	0.807025		0.362046	0.589922		0.00186744	0.816961		0.04548	0.815828		0.126514	0.738325
0.542601	0.602112		0.407708	0.672326		0.180267	0.625628		0.445121	0.653358		0.134111	0.719315		0.00985322	0.695025		0.668316	0.514312		0.10097	0.7336		0.169026	0.756337		0.0330349	0.75782		0.791998	0.518079		0.189472	0.655717		0.411329	0.763664		0.297393	0.609187		0.0117195	0.756293		0.00225894	0.778338		0.122153	0.763954
0.371389	0.661641		0.37539	0.685853		0.122427	0.629033		0.407221	0.624332		0.107728	0.735866		0.0447573	0.679599		0.663761	0.510745		0.24295	0.684207		0.188753	0.753864		0.0422829	0.733936		0.798998	0.519181		0.131767	0.701215		0.352454	0.732393		0.30392	0.616653		0.00773617	0.768862		0.00572461	0.802681		0.112686	0.740756
0.211824	0.72034		0.288672	0.825846		0.360704	0.774428		0.452551	0.738414		0.0512535	0.590795		0.00318177	0.812955		0.159431	0.59838		0.250455	0.743353		0.1787	0.539303		0.11731	0.799387		0.00140722	0.73876		0.220174	0.622932		0.0751362	0.827172		0.0385209	0.714374		0.0129327	0.823883		0.321245	0.695556		0.1786	0.764508
0.0927642	0.781199		0.294433	0.799634		0.229993	0.802804		0.509495	0.748717		0.263277	0.534988		0.0523669	0.822124		0.111417	0.615769		0.141395	0.752115		0.165273	0.656657		0.0713438	0.813547		0.0443608	0.720733		0.696241	0.629074		0.0754229	0.81582		0.0410301	0.707579		0.0147651	0.887992		0.588184	0.751979		0.252635	0.778125
0.0112165	0.72582		0.18812	0.833452		0.0181946	0.752659		0.441721	0.692309		0.062618	0.720365		0.0326092	0.820401		0.0552857	0.635268		0.0135445	0.70843		0.125566	0.71105		0.089882	0.868775		0.00968644	0.807812		0.261751	0.576897		0.0308935	0.853763		0.0786567	0.75295		0.0220585	0.883692		0.567385	0.77493		0.235554	0.781243
0.0425074	0.710739		0.190282	0.77958		0.191465	0.832383		0.460706	0.718634		0.0307731	0.659596		0.075388	0.735172		0.057597	0.745961		0.0119045	0.736526		0.0710811	0.68093		0.0594671	0.832154		0.0423385	0.778062		0.667575	0.619816		0.0550443	0.819273		0.0196567	0.765309		0.0124987	0.881164		0.490568	0.765026		0.132441	0.723695
0.00695582	0.708777		0.0965085	0.803045		0.148176	0.792284		0.321734	0.747579		0.00545552	0.694509		0.0273843	0.830022		0.0863115	0.588702		0.0152137	0.720093		0.039618	0.715632		0.0350061	0.845754		0.101846	0.766235		0.393821	0.558658		0.0376099	0.853607		0.131954	0.678109		0.00510294	0.901633		0.132454	0.814742		0.0243751	0.745547
0.00711305	0.670007		0.126807	0.796194		0.214338	0.845316		0.0930109	0.804127		0.20795	0.599288		0.0413805	0.813184		0.0852717	0.656688		0.057257	0.700869		0.0542113	0.723269		0.0424787	0.85923		0.0228339	0.783107		0.141803	0.613113		0.0220411	0.858084		0.117954	0.682964		0.0228476	0.909452		0.0785317	0.799701		0.223656	0.756434
0.058007	0.713822		0.27224	0.805923		0.0389406	0.834792		0.0130801	0.810678		0.0704988	0.569201		0.0285755	0.813921		0.0804065	0.530604		0.0663485	0.706017		0.0282537	0.640301		0.0602713	0.864454		0.162077	0.725555		0.159293	0.658949		0.171748	0.752543		0.0829328	0.715799		0.0251473	0.908061		0.125391	0.778538		0.215586	0.764669
0.0174695	0.708996		0.289661	0.792501		0.210429	0.82048		0.000559987	0.784707		0.0742185	0.673905		0.0146284	0.844843		0.301067	0.596096		0.498132	0.76354		0.0161077	0.783228		0.0516838	0.842584		0.259239	0.677934		0.116822	0.646731		0.295784	0.786169		0.0762082	0.699637		0.0195922	0.907805		0.0134032	0.784435		0.221926	0.779584
0.0719044	0.675018		0.154824	0.813071		0.0609435	0.613813		0.0108972	0.839046		0.072395	0.685998		0.0257197	0.753911		0.261208	0.562224		0.0483223	0.702026		0.0413011	0.72544		0.0538177	0.857941		0.0305474	0.774838		0.0462533	0.696259		0.253033	0.791097		0.0394547	0.750671		0.00754144	0.920218		0.0779809	0.746906		0.128728	0.784001
0.0166909	0.723243		0.0725676	0.826837		0.312725	0.837282		0.0221795	0.798301		0.32609	0.569617		0.00557477	0.781194		0.118939	0.648917		0.0120414	0.735075		0.0242848	0.815385		0.0634416	0.858619		0.0680993	0.770765		0.243318	0.678964		0.0801051	0.783781		0.0197463	0.733784		0.0329491	0.937416		0.145223	0.730798		0.0493544	0.788153
0.0880848	0.758838		0.180488	0.818119		0.0771997	0.81698		0.0521506	0.820916		0.0398844	0.649217		0.0290307	0.823595		0.156232	0.611305		0.0125798	0.750703		0.00268982	0.818056		0.0533357	0.865723		0.196993	0.667862		0.0771932	0.615273		0.0831438	0.807563		0.166874	0.678234		0.0215597	0.922833		0.0924733	0.762618		0.0617567	0.801456
0.0857086	0.738779		0.386245	0.772627		0.109825	0.71499		0.0181394	0.850377		0.214723	0.57813		0.0501113	0.81895		0.0223909	0.616135		0.0764871	0.6274		0.0386638	0.841393		0.0371546	0.806114		0.205571	0.644217		0.00463789	0.700332		0.0703626	0.838631		0.110415	0.708734		0.0395848	0.93877		0.153904	0.742914		0.0866549	0.771906
0.0248854	0.737709		0.229707	0.816697		0.141984	0.696387		0.000592696	0.841566		0.134134	0.768419		0.000178518	0.824276		0.00718035	0.647784		0.0816089	0.730473		0.0239591	0.753921		0.0149698	0.855767		0.074013	0.79182		0.0789079	0.722454		0.144849	0.79692		0.0929295	0.735944		0.0258559	0.944309		0.133048	0.722913		0.00322856	0.769414
0.0420338	0.733947		0.322421	0.782827		0.251858	0.832244		0.137594	0.73502		0.26781	0.547473		0.0235267	0.817154		0.092796	0.647402		0.0280383	0.763484		0.0838674	0.611632		0.00854955	0.84385		0.053217	0.78131		0.184974	0.727804		0.0367901	0.827483		0.114046	0.644099		0.0114066	0.940865		0.555547	0.750712		0.0886738	0.799318
0.0352205	0.724152		0.14493	0.857285		0.20555	0.837444		0.0360924	0.797596		0.0664806	0.565627		0.0355054	0.8109		0.0824379	0.647745		0.0240768	0.742392		0.0528931	0.821064		0.0317841	0.860734		0.109628	0.756299		0.0708065	0.721172		0.0571681	0.815817		0.0970744	0.673181		0.0162328	0.940877		0.44654	0.781087		0.0591384	0.799705
0.0824611	0.686317		0.214298	0.784296		0.145016	0.787546		0.0268195	0.767744		0.0753084	0.717738		0.0402261	0.792943		0.0116965	0.529586		0.0193723	0.745684		0.00961013	0.855462		0.00454174	0.849379		0.167732	0.711824		0.0564585	0.737278		0.00487284	0.810078		0.139182	0.706276		0.0141553	0.942746		0.397655	0.800598		0.0307112	0.776219
0			0			0			0			0			0			0			0			0			0			0			0			0			0			0			0			0
0.021938	0.747756		0.472842	0.773516		0.171102	0.650025		0.00734757	0.816849		0.016254	0.561409		0.0142212	0.810482		0.257732	0.618207		0.233655	0.726563		0.00411481	0.788966		0.0190575	0.828759		0.0645607	0.735566		0.564215	0.623257		0.0206265	0.835235		0.0685782	0.712208		0.0158228	0.951701		0.022802	0.725879		0.122183	0.789435
0.0440995	0.767887		0.256482	0.78628		0.00524933	0.584333		0.292614	0.72404		0.00789448	0.589675		0.0743335	0.767502		0.145095	0.658045		0.035653	0.731738		0.0249255	0.858903		0.0209462	0.846685		0.0428178	0.723897		0.159473	0.665617		0.321287	0.84049		0.130688	0.699137		0.00341445	0.959692		0.0679093	0.800362		0.134693	0.772402
0.0350045	0.677243		0.384846	0.718212		0.303203	0.830121		0.0773442	0.760787		0.0923784	0.656287		0.057814	0.757946		0.01271	0.671494		0.0991741	0.742484		0.0219265	0.793088		0.0319489	0.835108		0.225988	0.638443		0.149116	0.671645		0.0226917	0.800283		0.016395	0.703729		0.0153186	0.928216		0.173281	0.726401		0.109294	0.804538
0.0880112	0.634635		0.459642	0.692648		0.0482224	0.785309		0.0969466	0.803473		0.0959854	0.655863		0.0521322	0.800747		0.0796718	0.651907		0.150406	0.714837		0.0369439	0.80741		0.0733023	0.875009		0.029946	0.749727		0.0545258	0.683112		0.113642	0.803795			0.664948		0.00175388	0.93863		0.146932	0.754375		0.131276	0.763111
0.0852063	0.724995		0.30327	0.696401		0.0519226	0.731889		0.00786915	0.8244		0.0373154	0.648756		0.0985086	0.760666		0.027503	0.56082		0.316139	0.671623		0.03976	0.795639		0.0490286	0.83345		0.0345671	0.772496		0.0391349	0.702979		0.13205	0.852013		0.167985	0.728512		0.0130278	0.949521		0.165293	0.75973		0.146654	0.759722
0.156704	0.718039		0.173783	0.78274		0.175961	0.824012		0.0281096	0.794294		0.0938877	0.669155		0.00516177	0.812432		0.0125919	0.735373		0.0787984	0.763566		0.00477877	0.802963		0.014526	0.751346		0.0149786	0.756693		0.232779	0.726924		0.0586038	0.862774		0.0142084	0.672166		0.00440866	0.945474		0.202407	0.764389		0.150418	0.785492
0.146719	0.733773		0.171115	0.786151		0.0829884	0.845034		0.0737516	0.812725		0.118784	0.62363		0.030818	0.830612		0.157029	0.575263		0.0763477	0.682946		0.00633204	0.808546		0.0337758	0.775631		0.200246	0.667534		0.246604	0.681591		0.159552	0.815955			0.667387		0.0134096	0.942813		0.134883	0.709769		0.134412	0.755636
0.0662939	0.692074		0.0510746	0.832347		0.170182	0.63474		0.0135606	0.793653		0.104429	0.597326		0.0160025	0.815001		0.00992754	0.680496		0.0676078	0.729067		0.0568188	0.827656		0.0425876	0.810183		0.0179561	0.627488		0.661732	0.599194		0.0496844	0.836464		0.131832	0.715025		0.0015352	0.936337		0.00824088	0.781735		0.110916	0.763406
0.0520864	0.756274		0.227713	0.754284		0.183658	0.652834		0.0227833	0.775728		0.109599	0.68881		0.0370749	0.808615		0.187951	0.642297		0.0250867	0.723797		0.0607471	0.789628		0.0234338	0.7974		0.106989	0.698481		0.168554	0.63011		0.125791	0.839922		0.0624877	0.71397		0.0181935	0.938745		0.200473	0.747091		0.161288	0.750292
0.118005	0.678168		0.603222	0.758895		0.185935	0.590657		0.0115052	0.807731		0.326458	0.572735		0.042925	0.740227		0.205771	0.58638		0.0946491	0.654463		0.0689512	0.874851		0.0474227	0.794673		0.0849525	0.650306		0.137931	0.700806		0.119889	0.807358		0.294235	0.646218		0.0114836	0.936956		0.212222	0.743415		0.113848	0.785356
0.910868	0.584042		1.07234	0.728144		0.16666	0.651679		0.0205335	0.79845		0.0155799	0.708781		0.0165417	0.78471		0.0471958	0.70587		0.412409	0.728292		0.0127667	0.803882		0.00908829	0.757486		0.0188297	0.731261		0.137714	0.64592		0.0827996	0.851805		0.232143	0.689925		0.00972588	0.902578		0.10597	0.759291		0.0816375	0.779736
0.85155	0.563995		0.981163	0.749601		0.157457	0.602148		2.42987e-05	0.798859		0.234705	0.623142		0.037306	0.806676		0.0815109	0.646904		0.0101639	0.700377		0.0129917	0.830545		0.0154942	0.803284		0.255814	0.63433		0.068257	0.751462		0.155556	0.828476		0.00292412	0.689625		0.00425095	0.933569		0.17464	0.72077		0.0566972	0.769353
0.537174	0.668997		0.767144	0.740058		0.170058	0.608016		0.134864	0.767968		0.00668114	0.578555		0.0176982	0.79423		0.300905	0.561097		0.0334883	0.690066		0.0466548	0.830569		0.0267872	0.830735		0.120753	0.69465		0.120562	0.670978		0.0328745	0.842383		0.15641	0.638768		0.00887202	0.933377		0.153806	0.652138		0.107037	0.771764
0.717316	0.643868		0.79548	0.675273		0.424484	0.579545		0.581495	0.698987		0.035085	0.583999		0.167013	0.796379		0.90148	0.519506		0.206889	0.720211		0.101581	0.612939		0.134775	0.756484		0.783685	0.622849		0.13114	0.628345		0.682314	0.700326		0.901961	0.612647		0.072097	0.779828		0.111284	0.646134		0.209063	0.690651
0.615486	0.635922		1.10734	0.704414		0.477036	0.662904		0.733753	0.672199		0.0142686	0.693735		0.147998	0.810855		0.814947	0.514587		0.771616	0.702376		0.0575426	0.672484		0.150376	0.799732		0.754272	0.612172		0.0178066	0.631625		0.29024	0.768595		0.929513	0.653735		0.0730004	0.792574		0.533492	0.683736		0.232012	0.712279
0.332933	0.665877		1.0304	0.698985		0.342906	0.710703		0.631908	0.677529		0.235707	0.482836		0.0990727	0.80359		0.727432	0.519501		0.237369	0.747231		0.164739	0.609253		0.157654	0.809533		0.729636	0.597224		0.101974	0.676901		0.218884	0.730588		0.846723	0.63162		0.0933297	0.765179		0.44552	0.682964		0.234477	0.739783
0.336138	0.695802		0.745638	0.662414		0.113424	0.752273		0.42517	0.672843		0.118225	0.704918		0.0853569	0.77384		0.666395	0.465194		0.143653	0.728876		0.0902628	0.646045		0.172572	0.815316		0.720861	0.591871		0.0348193	0.699098		0.0913384	0.719592		0.820797	0.612474		0.124283	0.770121		0.442707	0.683683		0.231331	0.716616
0.446526	0.69886		0.395627	0.688336		0.0128008	0.633095		0.464737	0.683241		0.191242	0.527566		0.10764	0.779644		0.690608	0.506193		0.319654	0.708399		0.123334	0.733967		0.182262	0.797648		0.731091	0.604543		0.0443873	0.689072		0.110827	0.810638		0.552448	0.623898		0.115968	0.759076		0.408151	0.716163		0.239878	0.73827
0.343965	0.703826		0.388484	0.708255		0.0327264	0.596863		0.460702	0.660735		0.0853519	0.612844		0.0244398	0.723789		0.693391	0.490105		0.510928	0.71092		0.280127	0.718145		0.156425	0.789348		0.553956	0.560547		0.138726	0.700227		0.038511	0.741281		0.964596	0.642222		0.0643362	0.794246		0.328799	0.684961		0.236418	0.736084
0.326895	0.704349		0.482838	0.692846		0.0578337	0.496852		0.70908	0.666089		0.0106293	0.746747		0.117722	0.795482		0.673018	0.499119		0.485826	0.710713		0.247473	0.768137		0.166111	0.807042		0.723627	0.603305		0.0811583	0.669226		0.0830453	0.780263		0.938241	0.659611		0.0339819	0.825774		0.347712	0.687184		0.236216	0.742075
0.304859	0.711517		0.399784	0.692522		0.0286578	0.618762		0.640769	0.704627		0.125228	0.552551		0.0474958	0.703437		0.679552	0.495615		0.656624	0.727775		0.168331	0.805893		0.184365	0.818804		0.434652	0.586866		0.0361798	0.686602		0.247736	0.789439		0.51464	0.667526		0.0569135	0.805138		0.340685	0.70423		0.146339	0.773917
0.578302	0.669867		0.421736	0.690158		0.0446516	0.530077		0.569515	0.684742		0.223176	0.520848		0.0145216	0.739269		0.677572	0.482328		0.220212	0.712736		0.133483	0.784754		0.188673	0.813331		0.705258	0.597449		0.30459	0.690295		0.249088	0.712423		0.614875	0.630437		0.0971686	0.821305		0.241633	0.691809		0.164061	0.721551
0.542346	0.656479		0.378787	0.689485		0.479727	0.688052		0.551653	0.681022		0.00988115	0.578068		0.0748142	0.716516		0.689368	0.503715		0.201886	0.730292		0.0839499	0.798695		0.165127	0.797653		0.399693	0.556594		0.0622241	0.677107		0.0264177	0.708477		0.33803	0.631019		0.0915245	0.794774		0.352685	0.730993		0.222547	0.680478
0.350193	0.648965		0.381776	0.714648		0.292907	0.753403		0.550786	0.702536		0.0365748	0.754552		0.109848	0.678715		0.681731	0.500405		0.403931	0.739102		0.055243	0.783996		0.168619	0.809479		0.520473	0.570692		0.000580215	0.715717		0.0743456	0.810074		0.263403	0.705442		0.0681963	0.775029		0.380945	0.713048		0.259507	0.673912
0.289958	0.681483		0.66468	0.691372		0.0392464	0.610613		0.552206	0.689254		0.368096	0.540108		0.0110669	0.749134		0.601373	0.535631		0.581307	0.703031		0.129227	0.809737		0.15001	0.812374		0.53352	0.527972		0.0341636	0.712496		0.00446527	0.75678		0.233351	0.707808		0.0892777	0.822924		0.40569	0.703731		0.350016	0.693673
0.343893	0.701734		0.835692	0.67634		0.0399217	0.598618		0.546204	0.688533		0.0146115	0.625491		0.0158452	0.739052		0.614427	0.501705		0.150338	0.714963		0.120083	0.767098		0.153494	0.802817		0.481922	0.570314		0.261741	0.686648		0.083848	0.74046		0.521715	0.656921		0.111473	0.826684		0.410894	0.713058		0.33801	0.690167
0.346311	0.61456		0.427138	0.707613		0.0275498	0.607247		0.525435	0.714596		0.00546867	0.595451		0.0648725	0.679263		0.619334	0.518294		0.116133	0.729239		0.141045	0.77072		0.127495	0.823148		0.457682	0.588189		0.241797	0.684492		0.0566796	0.73299		0.711143	0.656697		0.104299	0.824637		0.401087	0.724868		0.276573	0.710626
0.377223	0.64309		0.336655	0.684934		0.00418549	0.639218		0.531227	0.710492		0.207678	0.680398		0.00351617	0.755197		0.635308	0.502069		0.487221	0.723373		0.15652	0.732829		0.130662	0.834923		0.647856	0.531576		0.0742827	0.714119		0.0254454	0.733244		0.493355	0.649137		0.109956	0.814979		0.449894	0.693682		0.258921	0.682192
0.393429	0.678335		0.354464	0.703628		0.0135433	0.570314		0.511552	0.672885		0.258148	0.48221		0.00223099	0.779449		0.630841	0.489219		0.581918	0.740979		0.131154	0.738632		0.134553	0.809678		0.615629	0.548975		0.408332	0.654548		0.134332	0.740391		0.57886	0.629286		0.115184	0.832383		0.455178	0.704094		0.18762	0.697331
0.335692	0.617027		0.396155	0.718677		0.0336457	0.551575		0.536192	0.642773		0.00149438	0.597578		0.031449	0.802632		0.66262	0.519383		0.115459	0.692388		0.153065	0.749081		0.245103	0.769358		0.382497	0.555443		0.302026	0.636335		0.0870517	0.767158		0.689489	0.637268		0.0820752	0.783655		0.411849	0.709308		0.0453355	0.7022
0.380759	0.700887		0.38035	0.718041		0.531647	0.664396		0.486195	0.656691		0.0188186	0.605173		0.0501278	0.73294		0.608235	0.486676		0.325668	0.705345		0.115893	0.762006		0.260363	0.818944		0.270476	0.536162		0.122476	0.651549		0.153343	0.740684		0.729369	0.625746		0.022723	0.81375		0.406723	0.72263		0.144992	0.698245
0.505698	0.599694		0.373461	0.701299		0.493114	0.693778		0.484339	0.638422		0.254896	0.68093		0.0378422	0.779042		0.600336	0.48944		0.653768	0.621674		0.130386	0.757429		0.227748	0.815594		0.382086	0.550942		0.000329249	0.692555		0.357873	0.751617		0.734746	0.612029		0.0775945	0.835288		0.359799	0.699118		0.132111	0.729373
0.577495	0.569358		0.68961	0.675841		0.301534	0.687674		0.478213	0.640651		0.32235	0.638751		0.0428853	0.738632		0.582987	0.493178		0.490472	0.646537		0.139955	0.710143		0.171594	0.813817		0.339986	0.538307		0.118709	0.673537		0.0568674	0.754758		0.341227	0.668233		0.0913572	0.835748		0.366983	0.701831		0.0749261	0.692842
0.972265	0.459909		1.01089	0.688903		0.214853	0.762589		0.503135	0.630943		0.243512	0.529524		0.097377	0.692886		0.5475	0.486008		0.134667	0.678947		0.169932	0.668581		0.128758	0.803286		0.274782	0.58152		0.050789	0.667864		0.0117773	0.746401		0.68272	0.65205		0.0682487	0.783931		0.369299	0.705044		0.0930389	0.721497
0.873405	0.531792		0.913296	0.661045		0.154694	0.710528		0.474952	0.664648		0.315753	0.57639		0.0742668	0.764547		0.579146	0.488072		0.120169	0.64838		0.160616	0.673086		0.101315	0.763243		0.22205	0.59542		0.0709651	0.718681		0.0100545	0.75995		0.51714	0.655038		0.0347262	0.808335		0.378392	0.694934		0.152545	0.730585
0.424591	0.63596		0.585628	0.647794		0.00400922	0.625751		0.497492	0.659223		0.107953	0.508151		0.0733364	0.688986		0.734915	0.48907		0.245618	0.704505		0.135995	0.772494		0.10715	0.777507		0.246754	0.539163		0.309118	0.700306		0.16449	0.716467		0.418683	0.584691		0.0111317	0.678616		0.379392	0.694668		0.13243	0.746127
0.280155	0.658997		0.404649	0.688219		0.0513122	0.651348		0.45901	0.656667		0.225762	0.557251		0.134527	0.639394		0.840552	0.516268		0.41448	0.673068		0.173953	0.731084		0.110332	0.776404		0.1566	0.604668		0.0375619	0.720737		0.0556002	0.714806		0.337262	0.625534		0.138727	0.655359		0.359601	0.689985		0.0899584	0.7426
0.264136	0.657065		0.364422	0.716395		0.465542	0.641874		0.454693	0.640517		0.611647	0.543939		0.28092	0.615056		0.777301	0.500213		0.174883	0.685602		0.175949	0.784944		0.120513	0.794992		0.216358	0.551689		0.095239	0.735648		0.0244818	0.75398		0.376129	0.649504		0.0102798	0.688555		0.338703	0.677834		0.146755	0.748274
0.247122	0.682073		0.380492	0.700662		0.527654	0.709633		0.453054	0.634088		0.324903	0.380332		0.197546	0.691337		0.648007	0.512745		0.473072	0.68771		0.136495	0.760555		0.12853	0.798167		0.391468	0.567064		0.150313	0.660028		0.0381221	0.779187		0.284211	0.685363		0.00291263	0.781191		0.329348	0.69077		0.119768	0.72312
0.283165	0.669281		0.491692	0.695957		0.233122	0.749495		0.449055	0.652545		0.014722	0.524683		0.0851066	0.813889		0.617629	0.501833		0.575177	0.687098		0.161566	0.764503		0.121865	0.780438		0.645279	0.561353		0.014531	0.716633		0.0290103	0.776528		0.186	0.683125		0.0167199	0.78595		0.338787	0.676979		0.19494	0.705726
0.632538	0.60058		0.386889	0.700068		0.0314901	0.695796		0.464655	0.649759		0.00135623	0.613897		0.0208987	0.749479		0.657157	0.48908		0.204298	0.666553		0.164097	0.78156		0.151643	0.756853		0.678194	0.57993		0.086877	0.665699		0.0638982	0.745257		0.222864	0.660723		0.0122879	0.808564		0.352175	0.682654		0.157226	0.758221
0.46014	0.609175		0.622006	0.668366		0.0352515	0.585175		0.47194	0.667345		0.0588025	0.59513		0.0303729	0.722673		0.680013	0.473537		0.0815979	0.695243		0.159415	0.76382		0.0284931	0.763677		0.624266	0.553604		0.24593	0.663866		0.406456	0.737893		0.158211	0.685514		0.00243585	0.749146		0.399914	0.674927		0.152864	0.739628
0.288928	0.633247		0.589688	0.654372		0.0225886	0.667589		0.434041	0.645478		0.0324194	0.597034		0.0849835	0.706658		0.675458	0.469429		0.223578	0.696427		0.179143	0.796139		0.0377412	0.749814		0.631265	0.581257		0.0753088	0.742348		0.347581	0.662593		0.164738	0.719275		0.0218915	0.762536		0.391931	0.686582		0.143397	0.747651
0.233762	0.690484		0.18417	0.833702		0.531806	0.673868		0.445203	0.753455		0.0349995	0.679563		0.0110395	0.77124		0.0983007	0.725985		0.0167999	0.703887		0.174585	0.492836		0.098253	0.791572		0.0659679	0.761262		0.344041	0.748156		0.0957627	0.749494		0.0300573	0.722706		0.00289005	0.81638		0.298443	0.828848		0.0564179	0.814417
0.114702	0.754106		0.178409	0.827014		0.401095	0.659341		0.502148	0.792007		0.247023	0.709405		0.0665881	0.761485		0.146315	0.666124		0.0922609	0.69853		0.161158	0.638283		0.0522863	0.838791		0.0201999	0.689763		0.132027	0.799253		0.0960494	0.791861		0.0275481	0.728661		0.00105765	0.874955		0.565382	0.768163		0.130453	0.805208
0.0107215	0.72186		0.284722	0.803889		0.189296	0.702353		0.434374	0.707255		0.046364	0.690691		0.0468304	0.760028		0.202446	0.605352		0.220111	0.661944		0.121451	0.702715		0.0708245	0.844091		0.0742471	0.725948		0.302463	0.777339		0.05152	0.79819		0.147235	0.687156		0.00623574	0.884757		0.544583	0.791017		0.113372	0.780318
0.0205694	0.715049		0.28256	0.814697		0.362567	0.681281		0.453358	0.739874		0.0145191	0.74904		0.0611668	0.758367		0.200135	0.604621		0.221751	0.719165		0.0669663	0.698132		0.0404097	0.832699		0.0222222	0.755216		0.10336	0.805814		0.0756708	0.797208		0.0489215	0.719475		0.00332411	0.883749		0.467766	0.774781		0.0102587	0.716834
0.0288939	0.758317		0.376334	0.791484		0.319277	0.684048		0.314387	0.765561		0.0107985	0.690889		0.0416055	0.786867		0.17142	0.639213		0.248869	0.712257		0.0355032	0.685803		0.0159486	0.855994		0.0372856	0.724644		0.170394	0.794542		0.0582364	0.810978		0.0633755	0.707353		0.0107198	0.906016		0.109652	0.728715		0.146558	0.720374
0.014825	0.687933		0.346035	0.806447		0.385439	0.699483		0.0856633	0.809571		0.191696	0.716358		0.0271593	0.763073		0.343004	0.519173		0.290912	0.66317		0.0500965	0.665771		0.0234212	0.851275		0.0417268	0.747458		0.422412	0.759538		0.00141459	0.793146		0.0493762	0.733741		0.00702486	0.901011		0.101334	0.809507		0.101474	0.79607
0.0799451	0.736537		0.200602	0.809031		0.210042	0.720152		0.00573248	0.853749		0.0542448	0.771107		0.0427968	0.811762		0.177325	0.662306		0.167307	0.708738		0.0241389	0.665536		0.0412139	0.866351		0.0975161	0.71731		0.404922	0.724898		0.151122	0.731569		0.0143546	0.674121		0.00932451	0.90769		0.148193	0.792067		0.0934031	0.828917
0.00446857	0.704702		0.183181	0.848222		0.381531	0.708407		0.00678759	0.848085		0.0904725	0.699587		0.0288496	0.768536		0.043335	0.770266		0.264477	0.736188		0.0119929	0.677596		0.0326263	0.867744		0.194678	0.726915		0.447392	0.715784		0.275157	0.73308		0.00762998	0.733815		0.00376945	0.921168		0.0362052	0.76401		0.0997431	0.809083
0.0499663	0.685567		0.318018	0.812663		0.110158	0.716637		0.0182447	0.833144		0.088649	0.720456		0.0114985	0.78767		0.00347636	0.792793		0.185333	0.681062		0.0454159	0.804554		0.0347603	0.846109		0.0340133	0.729381		0.517961	0.637018		0.232407	0.736068		0.0291235	0.661427		0.0233642	0.916471		0.100783	0.772019		0.00654547	0.767244
0.00524713	0.744998		0.400274	0.77682		0.483826	0.685046		0.0295271	0.864524		0.309836	0.687123		0.00864648	0.766565		0.138793	0.678158		0.221614	0.712848		0.02017	0.838734		0.0443841	0.855948		0.00353864	0.715471		0.320897	0.754831		0.100732	0.741309		0.0488319	0.710297		0.0171263	0.94404		0.168025	0.751998		0.0728281	0.725433
0.0661468	0.732308		0.292354	0.820256		0.248301	0.714957		0.044803	0.84505		0.0236304	0.655977		0.0148095	0.750271		0.1015	0.710012		0.246235	0.729033		0.00142499	0.806942		0.0342783	0.882193		0.132432	0.699788		0.487021	0.612101		0.10377	0.781948		0.098296	0.691395		0.00573695	0.922324		0.115275	0.730679		0.183939	0.740949
0.0637706	0.733993		0.086597	0.886234		0.0612763	0.717225		0.025487	0.823174		0.198468	0.590323		0.0358901	0.788563		0.235341	0.647446		0.310143	0.659177		0.0427786	0.763898		0.0180971	0.834656		0.14101	0.664902		0.559577	0.650279		0.0909891	0.813182		0.0418369	0.723449		0.023762	0.934317		0.176706	0.702902		0.208837	0.765729
0.0468234	0.765779		0.243135	0.865361		0.313086	0.702633		0.00675488	0.802266		0.11788	0.636179		0.0140427	0.838584		0.264912	0.58194		0.315264	0.708473		0.0280739	0.812055		0.00408765	0.832258		0.138574	0.725884		0.485307	0.663469		0.165476	0.753167		0.0243513	0.664259		0.0100331	0.943364		0.15585	0.815878		0.125411	0.740582
0.0200958	0.739352		0.150421	0.853484		0.422959	0.678346		0.130246	0.782378		0.251556	0.64373		0.00930545	0.786665		0.164936	0.664941		0.261694	0.757892		0.0879822	0.702957		0.0105079	0.846432		0.0113437	0.779854		0.749188	0.601374		0.0574167	0.73737		0.0454681	0.731313		0.00441617	0.942215		0.532745	0.774359		0.210856	0.794279
0.0132825	0.750244		0.327912	0.816502		0.376651	0.682211		0.0287448	0.764593		0.0502266	0.781579		0.0212842	0.754042		0.34017	0.530858		0.209579	0.691064		0.0487783	0.796103		0.0127266	0.836103		0.0450669	0.716687		0.493408	0.660427		0.0777946	0.755332		0.0284962	0.756651		0.000409977	0.94504		0.423738	0.802645		0.0630441	0.78354
0.0605231	0.702382		0.258544	0.809452		0.316117	0.679424		0.0194719	0.819548		0.0915624	0.687187		0.0260049	0.743996		0.246035	0.63657		0.253028	0.736864		0.0137249	0.830797		0.0235992	0.888508		0.103171	0.743376		0.620673	0.6051		0.0254994	0.769679		0.0706037	0.691916		0.00166747	0.949168		0.374853	0.795976		0.0914714	0.741465
0.021938	0.747756		0.472842	0.773516		0.171102	0.650025		0.00734757	0.816849		0.016254	0.561409		0.0142212	0.810482		0.257732	0.618207		0.233655	0.726563		0.00411481	0.788966		0.0190575	0.828759		0.0645607	0.735566		0.564215	0.623257		0.0206265	0.835235		0.0685782	0.712208		0.0158228	0.951701		0.022802	0.725879		0.122183	0.789435
0			0			0			0			0			0			0			0			0			0			0			0			0			0			0			0			0
0.0221615	0.704235		0.216361	0.872997		0.176351	0.684819		0.285267	0.728422		0.00835953	0.715933		0.0601123	0.73112		0.112637	0.749973		0.198002	0.731261		0.0290403	0.855541		0.00188872	0.85434		0.0217429	0.690747		0.404741	0.737957		0.300661	0.781867		0.06211	0.71079		0.0124083	0.958402		0.0907113	0.768284		0.0125106	0.77232
0.0130664	0.740932		0.087996	0.844394		0.474305	0.66914		0.0699966	0.786692		0.108632	0.702257		0.0435928	0.76575		0.245022	0.657075		0.134481	0.754012		0.0260413	0.811061		0.0128914	0.881339		0.161428	0.6971		0.415098	0.740536		0.0433182	0.740823		0.0849732	0.698068		0.0311413	0.929048		0.150479	0.646165		0.012889	0.809977
0.0660731	0.650708		0.0131997	0.863034		0.219324	0.685898		0.089599	0.765889		0.112239	0.739634		0.0379109	0.798542		0.17806	0.693035		0.0832492	0.659007		0.0410587	0.836803		0.0542449	0.829685		0.0945067	0.690807		0.509689	0.622717		0.134269	0.772592			0.706307		0.0140689	0.942452		0.169734	0.748449		0.00909329	0.79778
0.0632683	0.677396		0.169572	0.802415		0.223024	0.704024		0.000521576	0.805465		0.0535694	0.659222		0.0842874	0.674914		0.285235	0.620412		0.0824837	0.671746		0.0356452	0.718879		0.0299711	0.866962		0.0299936	0.704196		0.60335	0.593602		0.152676	0.814665		0.0994064	0.681699		0.00279495	0.952612		0.188095	0.737539		0.0244714	0.811085
0.134766	0.737722		0.299059	0.752046		0.347062	0.687468		0.0207621	0.825041		0.110142	0.740558		0.019383	0.74478		0.270324	0.569393		0.154857	0.733015		0.00889359	0.80795		0.00453142	0.774716		0.0795393	0.678078		0.796994	0.588715		0.0792303	0.800363		0.0827866	0.669123		0.0202314	0.94716		0.225209	0.775869		0.0282351	0.79157
0.124781	0.719839		0.301727	0.809741		0.25409	0.686381		0.0664041	0.81859		0.10253	0.795869		0.0450392	0.832911		0.100703	0.762337		0.310003	0.694434		0.00221722	0.806305		0.0528333	0.802953		0.135686	0.72254		0.317611	0.663921		0.138926	0.798534			0.682175		0.00241318	0.938614		0.112081	0.810523		0.0122296	0.799098
0.0443558	0.732313		0.421767	0.730127		0.000919267	0.67977		0.00621303	0.801339		0.0881746	0.701109		0.00178123	0.811338		0.247804	0.59002		0.301263	0.703793		0.0609336	0.854536		0.061645	0.812991		0.0466046	0.681587		0.0975169	0.856457		0.0290578	0.772305		0.0632534	0.674646		0.017358	0.933678		0.0145611	0.703584		0.0112665	0.741211
0.0301483	0.752431		0.245129	0.824718		0.0125567	0.675043		0.0301308	0.801244		0.0933447	0.709673		0.0228537	0.814527		0.445683	0.540509		0.208569	0.710717		0.0648619	0.805409		0.0424912	0.835981		0.042428	0.705548		0.39566	0.754645		0.146418	0.804932		0.131066	0.677149		0.0340163	0.9315		0.223275	0.69635		0.0391054	0.796446
0.0960669	0.735676		0.13038	0.878126		0.0148328	0.627872		0.0188528	0.845912		0.310204	0.753954		0.0287038	0.708596		0.0519606	0.779606		0.328305	0.665134		0.073066	0.785035		0.0664801	0.810787		0.0203919	0.732772		0.426283	0.713743		0.140515	0.780617		0.225657	0.698755		0.00433913	0.943941		0.235024	0.767961		0.00833468	0.823987
0.932806	0.598671		0.599501	0.868563		0.00444126	0.698166		0.0131859	0.828882		0.000674142	0.676857		0.00232047	0.799372		0.210536	0.632342		0.178754	0.730871		0.0168815	0.810046		0.0281457	0.787252		0.045731	0.755512		0.426501	0.70889		0.103426	0.813301		0.300721	0.647079		0.0060969	0.915221		0.0831677	0.67933		0.040545	0.800866
0.873488	0.595749		0.508321	0.862408		0.0136443	0.691453		0.00737187	0.807219		0.218451	0.786021		0.0515272	0.781405		0.339243	0.529677		0.223492	0.704494		0.0171065	0.870992		0.00356329	0.829318		0.191254	0.712995		0.495958	0.642946		0.176183	0.805149		0.0715023	0.714222		0.0200737	0.939233		0.197442	0.741897		0.0654853	0.716594
0.559112	0.658053		0.294302	0.856798		0.00104392	0.622999		0.127516	0.812204		0.00957287	0.753361		0.003477	0.709909		0.0431725	0.796708		0.200167	0.703385		0.0507696	0.84177		0.00772973	0.835325		0.185314	0.601536		0.443653	0.605317		0.053501	0.791717		0.224988	0.722754		0.0246948	0.941247		0.176608	0.679704		0.0151459	0.794809
0.739255	0.632384		0.322638	0.789877		0.595586	0.565937		0.574147	0.738788		0.051339	0.651406		0.181234	0.746657		0.643748	0.503941		0.026766	0.687794		0.0974658	0.59841		0.115717	0.731164		0.848246	0.619752		0.433074	0.708834		0.661687	0.664945		0.970539	0.61116		0.0879198	0.782487		0.0884821	0.745677		0.0868804	0.760146
0.637424	0.623299		0.634493	0.785884		0.648138	0.555575		0.726406	0.696061		0.0305226	0.56868		0.162219	0.768948		0.557215	0.509351		0.537961	0.72458		0.0616574	0.629756		0.131318	0.806047		0.818833	0.606633		0.546408	0.630751		0.269613	0.7281		0.998091	0.618333		0.0888231	0.787442		0.51069	0.722807		0.109829	0.754921
0.354871	0.642091		0.557563	0.787255		0.514008	0.592774		0.624561	0.706329		0.219453	0.645418		0.113294	0.792995		0.4697	0.518366		0.00371389	0.694778		0.168854	0.572893		0.138596	0.814778		0.794196	0.600732		0.666188	0.599471		0.198257	0.695597		0.915301	0.594628		0.109152	0.76849		0.422718	0.702205		0.112294	0.770531
0.358076	0.683821		0.272796	0.800984		0.284526	0.600474		0.417822	0.697959		0.101971	0.583663		0.0995781	0.70981		0.408663	0.489431		0.0900022	0.731584		0.0943776	0.545017		0.153515	0.816261		0.785421	0.586134		0.529395	0.616535		0.0707119	0.690149		0.889375	0.579832		0.140106	0.768112		0.419905	0.690111		0.109149	0.740358
0.468464	0.705868		0.0772155	0.821974		0.158301	0.665991		0.45739	0.720787		0.174988	0.647481		0.121862	0.729806		0.432876	0.495731		0.0859982	0.716933		0.11922	0.591491		0.163204	0.777541		0.795652	0.574198		0.608602	0.636931		0.0902	0.763714		0.621026	0.577645		0.131791	0.758885		0.385349	0.735696		0.117696	0.77855
0.365903	0.705346		0.0843578	0.837843		0.138375	0.597518		0.453354	0.733111		0.101606	0.649375		0.038661	0.66797		0.435659	0.495346		0.277273	0.708226		0.276012	0.626109		0.137367	0.781497		0.618517	0.586551		0.702941	0.591707		0.0178844	0.709256		1.03317	0.603044		0.080159	0.794427		0.305997	0.708922		0.114235	0.76127
0.348833	0.668367		0.00999623	0.814868		0.113268	0.598822		0.701732	0.680231		0.00562476	0.51391		0.131943	0.754697		0.415286	0.483516		0.252171	0.663033		0.243358	0.760085		0.147054	0.813628		0.788188	0.591804		0.483056	0.65303		0.0624187	0.7388		1.00682	0.633011		0.0498047	0.822178		0.32491	0.697457		0.114033	0.769083
0.326797	0.680677		0.0730576	0.803307		0.142444	0.611275		0.633421	0.72742		0.108974	0.694081		0.0617171	0.675589		0.42182	0.478106		0.422968	0.691971		0.164216	0.806005		0.165307	0.817244		0.499213	0.581459		0.600394	0.608248		0.227109	0.716717		0.583219	0.589549		0.0727362	0.808089		0.317883	0.731141		0.0241563	0.6897
0.60024	0.67102		0.0511058	0.791411		0.215753	0.603923		0.562167	0.718497		0.206922	0.516005		0.0287429	0.774108		0.41984	0.473624		0.0134438	0.720567		0.129368	0.769316		0.169615	0.825915		0.769819	0.576533		0.868805	0.521565		0.228461	0.685541		0.683453	0.599785		0.112991	0.81613		0.218831	0.622325		0.0418788	0.755788
0.564284	0.645686		0.094055	0.767526		0.650829	0.583533		0.544306	0.711175		0.0261352	0.658521		0.0605929	0.703362		0.431636	0.4881		0.0317695	0.700463		0.0798351	0.788601		0.14607	0.800025		0.464253	0.58501		0.50199	0.57522		0.00579118	0.696882		0.406608	0.624872		0.107347	0.799407		0.329883	0.742652		0.100364	0.716436
0.372132	0.678113		0.0910665	0.802823		0.464009	0.590639		0.543438	0.735361		0.0203208	0.512832		0.0956265	0.643764		0.423999	0.491916		0.170275	0.700246		0.0511282	0.757523		0.149561	0.813628		0.585033	0.591311		0.564795	0.582287		0.0537191	0.731672		0.331981	0.643357		0.0840191	0.774978		0.358143	0.735534		0.137325	0.699482
0.311896	0.639928		0.191838	0.794967		0.131855	0.613232		0.544858	0.694885		0.351842	0.611006		0.0252882	0.732383		0.343641	0.488445		0.347652	0.688233		0.125112	0.801027		0.130953	0.779017		0.598081	0.541272		0.598378	0.591642		0.0161613	0.698522		0.301929	0.661295		0.1051	0.831252		0.382888	0.717976		0.227833	0.731801
0.365831	0.677282		0.36285	0.762707		0.211023	0.599947		0.538856	0.712339		0.00164248	0.686563		0.0300664	0.715144		0.356695	0.466257		0.083317	0.709617		0.115968	0.813788		0.134436	0.821339		0.546483	0.5555		0.825956	0.505578		0.0632214	0.699437		0.590293	0.64721		0.127296	0.826409		0.388092	0.716228		0.215828	0.726499
0.368249	0.665517		0.0457042	0.78634		0.198652	0.606084		0.518088	0.733921		0.0217227	0.733853		0.0506513	0.672177		0.361602	0.475773		0.117523	0.696167		0.13693	0.734102		0.108438	0.839311		0.522243	0.601017		0.806012	0.569176		0.0360531	0.721442		0.779721	0.629701		0.120122	0.83176		0.378285	0.732093		0.154391	0.737124
0.399161	0.67606		0.136187	0.788673		0.166916	0.588394		0.523879	0.73437		0.191424	0.475587		0.0177374	0.693047		0.377576	0.4577		0.253566	0.695724		0.152406	0.732678		0.111604	0.830329		0.712416	0.564643		0.489932	0.609956		0.046072	0.714156		0.561933	0.583671		0.125779	0.814681		0.427092	0.713389		0.136739	0.722571
0.415367	0.618893		0.118378	0.816655		0.157558	0.548766		0.504204	0.687638		0.241894	0.693668		0.0164522	0.728385		0.373109	0.46061		0.348262	0.73039		0.127039	0.698617		0.115496	0.803808		0.68019	0.525484		0.155883	0.655961		0.113706	0.734197		0.647438	0.549234		0.131006	0.818712		0.432376	0.709961		0.065437	0.697689
0.35763	0.647174		0.0766875	0.802724		0.137456	0.592638		0.528844	0.685285		0.0177484	0.674303		0.0456702	0.736039		0.404888	0.489481		0.118196	0.696425		0.14895	0.695498		0.226045	0.77668		0.447058	0.562133		0.262189	0.72645		0.0664251	0.714711		0.758067	0.61302		0.097898	0.780924		0.389047	0.732049		0.076847	0.686107
0.402697	0.66933		0.092492	0.796983		0.702749	0.595775		0.478847	0.672233		0.00256458	0.699521		0.0359066	0.725437		0.350503	0.491662		0.0920128	0.709575		0.111778	0.754255		0.241306	0.814739		0.335037	0.57195		0.441738	0.690072		0.132717	0.696254		0.797948	0.553744		0.0385458	0.815881		0.383921	0.733793		0.022809	0.778354
0.527636	0.647375		0.0993808	0.797432		0.664216	0.584642		0.476991	0.658261		0.238642	0.460718		0.0520635	0.731321		0.342604	0.484794		0.420112	0.648616		0.126271	0.736458		0.20869	0.783161		0.446647	0.567628		0.564544	0.625742		0.337246	0.705839		0.803324	0.576508		0.0934172	0.83572		0.336997	0.736861		0.00992872	0.724484
0.599433	0.585141		0.216768	0.7665		0.472636	0.588394		0.470866	0.659012		0.306096	0.619045		0.0571065	0.674268		0.325255	0.507715		0.256817	0.618279		0.13584	0.691335		0.152537	0.805556		0.404546	0.55987		0.445505	0.649798		0.0362409	0.729146		0.409805	0.586637		0.10718	0.833714		0.344181	0.733732		0.0472565	0.697314
0.994203	0.475944		0.538045	0.77953		0.385955	0.637862		0.495787	0.655063		0.227258	0.686706		0.0831558	0.651931		0.289768	0.480842		0.0989889	0.660698		0.165817	0.659141		0.109701	0.770115		0.339343	0.561903		0.513426	0.639606		0.0324039	0.757185		0.751298	0.599469		0.0840715	0.797298		0.346497	0.745524		0.0291436	0.682971
0.895343	0.528056		0.440454	0.758803		0.325796	0.643785		0.467605	0.677194		0.299499	0.611449		0.088488	0.779567		0.321414	0.474695		0.113487	0.643985		0.156501	0.673095		0.0822571	0.78686		0.286611	0.622148		0.63518	0.583003		0.0105721	0.70171		0.585718	0.586982		0.050549	0.803997		0.35559	0.720511		0.0303625	0.712006
0.446529	0.672897		0.112786	0.73554		0.167093	0.643396		0.490144	0.666746		0.0916991	0.616673		0.0591152	0.635471		0.477183	0.464038		0.0119623	0.694706		0.13188	0.749331		0.0880924	0.759207		0.311315	0.557541		0.873332	0.535312		0.143863	0.700133		0.487262	0.560163		0.00469103	0.686322		0.35659	0.73249		0.0102478	0.716509
0.302093	0.657315		0.0681929	0.80009		0.222414	0.669553		0.451662	0.667683		0.209508	0.464814		0.120306	0.611626		0.58282	0.484973		0.180824	0.690171		0.169838	0.707912		0.0912748	0.766161		0.22116	0.625723		0.526653	0.615745		0.0349736	0.686699		0.40584	0.55732		0.122905	0.656448		0.336799	0.709079		0.0322241	0.724788
0.286074	0.725651		0.10842	0.811138		0.636644	0.572333		0.447346	0.663405		0.595393	0.585847		0.266699	0.585408		0.519569	0.471208		0.0587724	0.66263		0.171834	0.760626		0.101455	0.802953		0.280919	0.551853		0.659454	0.58326		0.0451084	0.733702		0.444707	0.588968		0.00554299	0.700379		0.315902	0.702282		0.0245725	0.7657
0.26906	0.683279		0.0923498	0.795166		0.698756	0.587961		0.445706	0.644844		0.308649	0.457505		0.183324	0.675801		0.390275	0.510132		0.239417	0.672738		0.13238	0.759089		0.109472	0.818288		0.456029	0.580331		0.714527	0.548142		0.0587486	0.739038		0.35279	0.632478		0.0187354	0.777794		0.306546	0.710553		0.00241498	0.7137
0.305103	0.685261		0.0188495	0.801387		0.404224	0.633446		0.441708	0.676652		0.00153197	0.603676		0.0993279	0.751306		0.359897	0.498989		0.341521	0.690905		0.157451	0.755715		0.102808	0.77948		0.709839	0.543681		0.549684	0.573452		0.0496368	0.725914		0.254578	0.615515		0.0325427	0.789461		0.315985	0.697381		0.0727575	0.701765
0.654476	0.62988		0.0859527	0.778798		0.202592	0.624789		0.457308	0.657215		0.0176102	0.656782		0.0351199	0.707461		0.399425	0.445857		0.0293578	0.651237		0.159983	0.777091		0.132586	0.759628		0.742754	0.563022		0.651092	0.564839		0.0432717	0.69148		0.291442	0.635657		0.00353491	0.811429		0.329373	0.70702		0.035043	0.753813
0.482078	0.670218		0.149164	0.743107		0.13585	0.627643		0.464593	0.688757		0.0425485	0.669471		0.0161517	0.706641		0.422281	0.452572		0.152058	0.686685		0.155301	0.750994		0.00943568	0.776695		0.688826	0.563394		0.810145	0.564734		0.385829	0.70906		0.226789	0.624245		0.0133869	0.748071		0.377112	0.667057		0.0306812	0.756116
0.310866	0.706938		0.116846	0.780983		0.19369	0.634308		0.426693	0.652024		0.0161654	0.670294		0.0707622	0.632658		0.417726	0.433819		0.0100777	0.671622		0.175028	0.731608		0.0186837	0.735685		0.695826	0.537779		0.488906	0.607839		0.326955	0.658285		0.233316	0.606805		0.00606871	0.767655		0.369129	0.722671		0.0212149	0.705272
0.255924	0.690659		0.0321908	0.846776		0.355455	0.712671		0.159937	0.834294		0.043359	0.591507		0.0711518	0.720729		0.0143364	0.665253		0.214802	0.739739		0.203625	0.501071		0.0963642	0.771238		0.044225	0.707883		0.0607005	0.753989		0.396423	0.855414		0.0921673	0.71514		0.00951828	0.816025		0.389154	0.77921		0.0439072	0.806167
0.136864	0.678521		0.0379517	0.856926		0.224744	0.71493		0.216881	0.808337		0.255382	0.618263		0.1267	0.738488		0.0336777	0.705072		0.105742	0.685885		0.190198	0.659109		0.0503976	0.815974		0.00154297	0.669125		0.536768	0.728983		0.39671	0.803121		0.0896581	0.686623		0.0113507	0.874203		0.656093	0.822659		0.117942	0.821567
0.032883	0.828462		0.0683618	0.83099		0.0129453	0.657111		0.149107	0.851194		0.0547236	0.616348		0.106943	0.701021		0.0898092	0.654804		0.0221085	0.672671		0.150492	0.725375		0.0689358	0.817512		0.0525042	0.693318		0.102278	0.733453		0.352181	0.790827		0.209345	0.666247		0.0186441	0.880407		0.635294	0.82331		0.100861	0.804034
0.00159211	0.703689		0.0661995	0.869005		0.186216	0.691164		0.168091	0.837693		0.0228786	0.666864		0.00105449	0.791402		0.0874979	0.688817		0.0237485	0.717535		0.0960066	0.748569		0.038521	0.857355		0.00047928	0.72262		0.508101	0.758525		0.376331	0.806248		0.111032	0.66421		0.00908422	0.868036		0.558477	0.824226		0.00225194	0.69504
0.0510554	0.728226		0.159973	0.821626		0.142926	0.717817		0.0291198	0.789189		0.00243896	0.650786		0.101718	0.732088		0.0587834	0.626602		0.0508667	0.670358		0.0645435	0.718583		0.0140599	0.830387		0.0590285	0.731219		0.234347	0.699957		0.358897	0.857655		0.00126547	0.697658		0.00168849	0.898672		0.200363	0.847899		0.159068	0.733228
0.0369865	0.722815		0.129674	0.824442		0.209088	0.650793		0.199603	0.751654		0.200056	0.625552		0.032953	0.716421		0.230367	0.550618		0.09291	0.71735		0.0791368	0.722412		0.0215325	0.837373		0.0199839	0.734582		0.0176705	0.763633		0.299246	0.867561		0.0127338	0.711529		0.0194332	0.903066		0.0106224	0.829044		0.0889631	0.810842
0.102107	0.751144		0.0157583	0.822601		0.0336912	0.677996		0.279534	0.718915		0.0626043	0.661793		0.102909	0.706464		0.0646884	0.568336		0.0306955	0.721886		0.0531792	0.674908		0.0393251	0.839021		0.119259	0.648026		0.000180687	0.768817		0.149539	0.825064		0.0477554	0.732431		0.0217328	0.899906		0.0574815	0.805181		0.0808925	0.817341
0.0266301	0.701912		0.0331799	0.876471		0.20518	0.713283		0.292054	0.714813		0.082113	0.650511		0.0889619	0.759822		0.155972	0.746716		0.462479	0.726279		0.0410331	0.716159		0.0307376	0.866535		0.216421	0.652258		0.0426512	0.749531		0.0255033	0.794635		0.05448	0.70404		0.0161778	0.91129		0.0545061	0.824847		0.0872325	0.84028
0.0278048	0.729357		0.101657	0.825765		0.0661928	0.780281		0.303511	0.718748		0.0802894	0.663618		0.0486138	0.709979		0.116113	0.719322		0.0126693	0.697936		0.0163757	0.774491		0.0328715	0.865503		0.0122704	0.752448		0.11322	0.718792		0.068254	0.8307		0.0912335	0.660287		0.0109559	0.926959		0.0100716	0.829219		0.00596515	0.770888
0.0274086	0.739298		0.183914	0.833001		0.307475	0.702811		0.314794	0.702036		0.318196	0.623222		0.0687588	0.740118		0.0261561	0.708188		0.0236116	0.728718		0.0492102	0.871992		0.0424954	0.854229		0.0252815	0.759529		0.0838444	0.783241		0.401392	0.789967		0.110942	0.678859		0.0295347	0.933564		0.0773137	0.805166		0.0853387	0.748885
0.0439853	0.761735		0.0759939	0.829824		0.0719504	0.668347		0.240464	0.751844		0.0319899	0.707886		0.0453028	0.735176		0.0111371	0.697043		0.0482328	0.785587		0.0276153	0.854224		0.0323896	0.858363		0.154175	0.624094		0.0822803	0.682674		0.404431	0.834349		0.036186	0.649126		0.0181453	0.924169		0.024564	0.841745		0.19645	0.739495
0.0416091	0.737224		0.129764	0.859334		0.115075	0.664914		0.310754	0.718424		0.206828	0.589097		0.0242222	0.747039		0.122704	0.632457		0.11214	0.71254		0.0137384	0.818581		0.0162084	0.8061		0.162753	0.698698		0.154836	0.694486		0.39165	0.850452		0.0202731	0.652884		0.0361704	0.939193		0.0859945	0.760576		0.221348	0.743582
0.0689849	0.728337		0.0267748	0.851679		0.136735	0.74934		0.292022	0.717726		0.126239	0.61086		0.074155	0.725768		0.152275	0.628994		0.117262	0.772599		0.000966368	0.804186		0.00597637	0.839759		0.116831	0.759076		0.0805656	0.704084		0.466136	0.776905		0.0377588	0.788369		0.0224414	0.952478		0.0651382	0.759697		0.137922	0.735873
0.0020657	0.753388		0.0659399	0.844353		0.246608	0.695215		0.155021	0.828313		0.259915	0.611826		0.0508068	0.741144		0.0522989	0.651099		0.0636913	0.760109		0.0589419	0.686341		0.0123966	0.835221		0.0103992	0.72343		0.344447	0.643807		0.358077	0.842088		0.0166419	0.720326		0.00799216	0.94832		0.623456	0.825137		0.223367	0.72066
0.008879	0.800866		0.111552	0.837973		0.2003	0.690564		0.256522	0.76518		0.0585862	0.691439		0.0388281	0.739936		0.227533	0.55296		0.0115762	0.750409		0.0778186	0.839261		0.0108379	0.865793		0.0668098	0.696263		0.088667	0.688672		0.378455	0.820169		0.0336139	0.683265		0.0128183	0.945138		0.51445	0.845886		0.0755547	0.739145
0.0383616	0.716351		0.0421834	0.832533		0.139766	0.698817		0.265795	0.786292		0.0832029	0.66613		0.0341074	0.778685		0.133398	0.606989		0.0550253	0.747398		0.0153153	0.879086		0.0254879	0.854826		0.124914	0.711614		0.215932	0.660457		0.32616	0.85999		0.00849373	0.712784		0.0107409	0.945822		0.465565	0.851794		0.103982	0.769069
0.0440995	0.767887		0.256482	0.78628		0.00524933	0.584333		0.292614	0.72404		0.00789448	0.589675		0.0743335	0.767502		0.145095	0.658045		0.035653	0.731738		0.0249255	0.858903		0.0209462	0.846685		0.0428178	0.723897		0.159473	0.665617		0.321287	0.84049		0.130688	0.699137		0.00341445	0.959692		0.0679093	0.800362		0.134693	0.772402
0.0221615	0.704235		0.216361	0.872997		0.176351	0.684819		0.285267	0.728422		0.00835953	0.715933		0.0601123	0.73112		0.112637	0.749973		0.198002	0.731261		0.0290403	0.855541		0.00188872	0.85434		0.0217429	0.690747		0.404741	0.737957		0.300661	0.781867		0.06211	0.71079		0.0124083	0.958402		0.0907113	0.768284		0.0125106	0.77232
0			0			0			0			0			0			0			0			0			0			0			0			0			0			0			0			0
0.00909507	0.703535		0.128364	0.786589		0.297954	0.696148		0.21527	0.749781		0.100273	0.730131		0.0165195	0.760814		0.132385	0.63376		0.0635211	0.77151		0.00299894	0.86402		0.0110027	0.871729		0.18317	0.637952		0.0103571	0.776588		0.343979	0.823354		0.147083	0.688445		0.018733	0.938643		0.241191	0.795662		0.0253996	0.832736
0.0439116	0.74155		0.203161	0.785084		0.042973	0.60338		0.195668	0.785263		0.10388	0.70027		0.0222014	0.744212		0.065423	0.727223		0.114753	0.715617		0.0120184	0.88732		0.0523561	0.870839		0.0727638	0.779977		0.104948	0.722796		0.434929	0.818912			0.616111		0.00166057	0.94094		0.0790228	0.816803		0.00341733	0.833789
0.0411068	0.73743		0.0467884	0.780972		0.0466732	0.722392		0.284745	0.747393		0.0452098	0.653862		0.0241751	0.757686		0.172598	0.636711		0.280486	0.725114		0.0646855	0.760238		0.0280824	0.825511		0.00825069	0.701363		0.198608	0.681283		0.453337	0.82687		0.0372964	0.680237		0.00961337	0.954845		0.0973837	0.826522		0.0119608	0.819864
0.112604	0.760257		0.0826989	0.736884		0.170711	0.705116		0.264505	0.754165		0.101782	0.709741		0.0794953	0.734348		0.157687	0.604766		0.0431454	0.740365		0.0201467	0.824526		0.00642014	0.754708		0.0577964	0.788546		0.392253	0.67617		0.379891	0.865579		0.144897	0.729979		0.00782311	0.945134		0.134498	0.820194		0.0157245	0.759345
0.10262	0.780167		0.0853665	0.824453		0.077739	0.646433		0.218863	0.796554		0.110889	0.708691		0.105152	0.737397		0.0119342	0.744746		0.112001	0.699518		0.0312575	0.840615		0.054722	0.807384		0.157429	0.66234		0.0871301	0.682989		0.161735	0.85354			0.701713		0.00999515	0.939615		0.202792	0.775749		0.000280983	0.784305
0.0221943	0.680237		0.205407	0.770599		0.175432	0.631241		0.279054	0.724185		0.0965342	0.704603		0.0583311	0.719151		0.135167	0.615972		0.103261	0.700158		0.0318933	0.886797		0.0635338	0.820587		0.0248617	0.719792		0.502258	0.739024		0.271603	0.85283		0.00114337	0.729805		0.00494964	0.938035		0.0761502	0.847818		0.0237772	0.766463
0.00798685	0.710363		0.0287682	0.829703		0.188908	0.654005		0.315398	0.712268		0.101704	0.657584		0.0372586	0.749315		0.333046	0.552636		0.0105664	0.74348		0.0358217	0.870795		0.0443799	0.793355		0.0641709	0.748241		0.00908097	0.719617		0.447078	0.803433		0.193176	0.665651		0.021608	0.948179		0.132564	0.793789		0.0265948	0.788621
0.0739054	0.735354		0.346741	0.839805		0.191184	0.647764		0.30412	0.736874		0.318563	0.661135		0.0314085	0.727801		0.0606765	0.760709		0.130302	0.693887		0.0440257	0.820985		0.0683689	0.784992		0.0421348	0.71216		0.0215423	0.73487		0.441176	0.809177		0.163547	0.75731		0.0080692	0.948539		0.144313	0.785292		0.0208453	0.804129
0.954968	0.575286		0.815862	0.8236		0.17191	0.605387		0.272081	0.736102		0.00768539	0.615182		0.0577918	0.762188		0.0978991	0.694879		0.376756	0.754657		0.0121588	0.840598		0.0300345	0.801216		0.0239881	0.7279		0.02176	0.714938		0.404087	0.831944		0.362831	0.702177		0.00631143	0.919262		0.173879	0.787945		0.0530557	0.781303
0.89565	0.602066		0.724682	0.818521		0.162707	0.682298		0.292639	0.713086		0.226811	0.717939		0.111639	0.703402		0.226606	0.534836		0.0254891	0.685694		0.0119338	0.893084		0.00545202	0.845045		0.212996	0.626132		0.0912165	0.693791		0.476843	0.789497		0.133612	0.613582		0.0076654	0.943455		0.106731	0.768132		0.0779959	0.75672
0.581274	0.703995		0.510663	0.805332		0.175307	0.653043		0.157751	0.69821		0.00121334	0.679565		0.0566353	0.715839		0.15581	0.711858		0.00216471	0.722343		0.0217293	0.884422		0.00584101	0.853335		0.163571	0.721202		0.0389119	0.70716		0.354162	0.841471		0.287098	0.722356		0.0122865	0.947569		0.0858969	0.735564		0.0276566	0.822055
0.761416	0.663267		0.538998	0.740628		0.419235	0.635243		0.28888	0.774352		0.0429795	0.568899		0.241347	0.673691		0.756385	0.477567		0.171236	0.706005		0.126506	0.57527		0.113829	0.752557		0.826503	0.601577		0.0283332	0.710602		0.361027	0.736419		1.03265	0.595238		0.0755114	0.778905		0.179193	0.693026		0.0743698	0.704107
0.659586	0.658615		0.850854	0.755597		0.471787	0.604139		0.441139	0.783226		0.0221631	0.539667		0.222332	0.721879		0.669852	0.487126		0.735963	0.664303		0.0326171	0.645884		0.129429	0.831097		0.79709	0.5682		0.141667	0.698876		0.0310472	0.801183		1.0602	0.585581		0.0764148	0.794996		0.601401	0.73001		0.0973189	0.754265
0.377033	0.701404		0.773923	0.763324		0.337657	0.611143		0.339294	0.804423		0.227812	0.586583		0.173406	0.734913		0.582337	0.471548		0.201716	0.717733		0.139814	0.591726		0.136707	0.847047		0.772453	0.571431		0.261447	0.674496		0.102403	0.762786		0.977411	0.556514		0.0967441	0.771547		0.513429	0.731675		0.0997838	0.763096
0.380238	0.703597		0.489156	0.784613		0.108174	0.550355		0.132556	0.717645		0.11033	0.580866		0.15969	0.721828		0.5213	0.432647		0.108	0.75645		0.0653373	0.588746		0.151626	0.824133		0.763678	0.57054		0.124654	0.682252		0.229949	0.749809		0.951485	0.526311		0.127697	0.76806		0.510616	0.70889		0.0966382	0.760979
0.490625	0.679419		0.139145	0.791821		0.0180501	0.623975		0.172123	0.676397		0.183348	0.638354		0.181974	0.730259		0.545513	0.441806		0.284001	0.710527		0.14826	0.641303		0.161315	0.797488		0.773909	0.564198		0.203861	0.676835		0.210461	0.772647		0.683136	0.525436		0.119383	0.768575		0.47606	0.75903		0.105185	0.786223
0.388064	0.721694		0.132003	0.812964		0.0379757	0.547327		0.168088	0.730147		0.0932464	0.647957		0.0987733	0.757071		0.548296	0.438368		0.475275	0.678017		0.305052	0.659945		0.135479	0.810577		0.596774	0.549443		0.298199	0.631336		0.282776	0.752584		1.09528	0.599608		0.0677506	0.797677		0.396709	0.740548		0.101725	0.770234
0.370995	0.703675		0.226357	0.801106		0.063083	0.56619		0.416465	0.779729		0.00273477	0.506082		0.192056	0.729645		0.527923	0.422333		0.450173	0.684688		0.272398	0.793814		0.145165	0.84665		0.766445	0.544928		0.0783152	0.679949		0.238242	0.778227		1.06893	0.579347		0.0373963	0.82547		0.415622	0.717326		0.101522	0.773495
0.348959	0.731505		0.143303	0.775745		0.0339071	0.580603		0.348154	0.746408		0.117334	0.636523		0.121829	0.740291		0.534457	0.415165		0.620971	0.679317		0.193256	0.838525		0.163419	0.823966		0.47747	0.553689		0.195653	0.669165		0.0735511	0.814512		0.645329	0.525743		0.0603279	0.805113		0.408594	0.76614		0.0116457	0.727859
0.622402	0.64418		0.165255	0.786509		0.0394022	0.664572		0.276901	0.784385		0.215281	0.503782		0.0888551	0.730678		0.532477	0.410873		0.184559	0.737708		0.158408	0.802026		0.167727	0.796732		0.748076	0.546521		0.464064	0.620822		0.0721992	0.792597		0.745563	0.534434		0.100583	0.823249		0.309543	0.740543		0.0293682	0.696861
0.586446	0.687337		0.122306	0.750392		0.474478	0.611448		0.259039	0.76302		0.0177756	0.646666		0.00048065	0.734573		0.544273	0.435984		0.166233	0.714156		0.108875	0.825926		0.144181	0.843054		0.44251	0.535871		0.0972494	0.654162		0.294869	0.751993		0.468718	0.52991		0.0949389	0.800196		0.420594	0.768655		0.0878534	0.711496
0.394293	0.661001		0.125294	0.795557		0.287658	0.580882		0.258172	0.720808		0.0286803	0.498618		0.0355142	0.770521		0.536636	0.440255		0.368278	0.693652		0.0801685	0.816893		0.147673	0.813019		0.56329	0.554625		0.160054	0.662952		0.246942	0.810041		0.394091	0.602067		0.0716108	0.772888		0.448854	0.770926		0.124814	0.711064
0.334058	0.711243		0.408198	0.748527		0.0444958	0.677653		0.259591	0.691984		0.360201	0.529993		0.0854005	0.753259		0.456278	0.447508		0.545654	0.647162		0.154152	0.843008		0.129064	0.79851		0.576338	0.505099		0.193637	0.640437		0.316822	0.762487		0.364039	0.617759		0.0926921	0.82755		0.473599	0.744201		0.215323	0.714521
0.387993	0.707264		0.579211	0.748916		0.0346723	0.602369		0.253589	0.740425		0.00671706	0.612127		0.0901787	0.799596		0.469332	0.424974		0.114685	0.719534		0.145008	0.822024		0.132547	0.819692		0.52474	0.508455		0.421215	0.628633		0.237439	0.761741		0.652403	0.558066		0.114888	0.822959		0.478804	0.760561		0.203317	0.721273
0.39041	0.626302		0.170656	0.765814		0.0223005	0.59662		0.232821	0.729974		0.0133632	0.656954		0.009461	0.771219		0.474239	0.427216		0.0804799	0.721576		0.16597	0.77541		0.106549	0.836841		0.5005	0.545393		0.40127	0.613748		0.264607	0.763321		0.841831	0.600928		0.107714	0.831223		0.468996	0.775042		0.14188	0.733003
0.421323	0.660902		0.0801735	0.783426		0.00943481	0.578053		0.238612	0.726048		0.199784	0.509692		0.0778497	0.693776		0.490213	0.422759		0.451568	0.727227		0.181446	0.761477		0.109715	0.836353		0.690674	0.534779		0.0851907	0.650605		0.346733	0.737047		0.624043	0.546792		0.11337	0.815459		0.517803	0.739492		0.124228	0.723252
0.437528	0.665605		0.0979824	0.798407		0.0187926	0.555514		0.218937	0.711721		0.250254	0.612532		0.0765645	0.753066		0.485746	0.396268		0.546265	0.733558		0.15608	0.736843		0.113607	0.830856		0.658447	0.516781		0.248859	0.660783		0.186955	0.793455		0.709548	0.562354		0.118598	0.831738		0.523088	0.743315		0.0529264	0.703659
0.379791	0.662488		0.139673	0.785416		0.038895	0.566855		0.243578	0.698891		0.00938886	0.67507		0.105783	0.728704		0.517525	0.460806		0.0798065	0.750397		0.17799	0.735882		0.224156	0.775749		0.425315	0.527828		0.142552	0.727625		0.234235	0.749754		0.820177	0.58629		0.0854897	0.782222		0.479759	0.76394		0.0893576	0.666688
0.424859	0.716912		0.123869	0.784061		0.526398	0.635747		0.193581	0.689163		0.0109241	0.654431		0.0242057	0.702962		0.46314	0.429666		0.290015	0.721682		0.140818	0.783608		0.239417	0.82427		0.313294	0.52869		0.0369974	0.698762		0.167944	0.755827		0.860058	0.512951		0.0261375	0.813077		0.474632	0.762657		0.0102984	0.742591
0.549798	0.638987		0.11698	0.809407		0.487865	0.606851		0.191724	0.700395		0.247002	0.47218		0.112176	0.735606		0.455241	0.432522		0.618115	0.618076		0.155311	0.763955		0.206802	0.809662		0.424904	0.537894		0.159803	0.661399		0.0365857	0.808581		0.865434	0.53093		0.0810089	0.837063		0.427708	0.754051		0.0025819	0.68251
0.621594	0.60634		0.433128	0.750096		0.296285	0.614981		0.185599	0.665388		0.314455	0.572258		0.117219	0.692156		0.437892	0.447701		0.454819	0.602204		0.164881	0.722191		0.150648	0.796593		0.382804	0.506102		0.0407642	0.721111		0.26442	0.779859		0.471915	0.5243		0.0947716	0.834236		0.434893	0.752627		0.0597671	0.778495
1.01636	0.438285		0.754405	0.745224		0.209604	0.617437		0.210521	0.673161		0.235618	0.608273		0.0230435	0.723156		0.402405	0.417796		0.0990135	0.654217		0.194858	0.666568		0.107812	0.792643		0.3176	0.54303		0.108684	0.684756		0.333064	0.75999		0.813408	0.571206		0.0716631	0.795771		0.437209	0.767133		0.0416542	0.659517
0.917505	0.539954		0.656814	0.726515		0.149445	0.631394		0.182338	0.702491		0.307858	0.560963		0.1486	0.734105		0.434051	0.426452		0.0845158	0.678223		0.185541	0.701257		0.0803684	0.812759		0.264868	0.595334		0.230439	0.645727		0.311233	0.762776		0.647828	0.597654		0.0381407	0.8023		0.446301	0.739385		0.0178519	0.790728
0.468691	0.643652		0.329147	0.717839		0.00925855	0.622344		0.204878	0.702111		0.100059	0.613379		0.000997145	0.763024		0.58982	0.430189		0.209965	0.684767		0.16092	0.785993		0.0862036	0.777484		0.289572	0.537314		0.468591	0.652042		0.156797	0.788142		0.549372	0.500242		0.0077173	0.67307		0.447302	0.744485		0.00226278	0.768605
0.324255	0.67507		0.148168	0.802536		0.0460629	0.673749		0.166396	0.686131		0.217868	0.441308		0.0601938	0.695397		0.695457	0.461766		0.378827	0.643381		0.198879	0.725422		0.0893861	0.785007		0.199417	0.577378		0.121912	0.630889		0.265687	0.749737		0.46795	0.497318		0.135313	0.65536		0.427511	0.743016		0.0447347	0.771099
0.308236	0.691523		0.10794	0.800702		0.460293	0.622358		0.162079	0.685216		0.603753	0.520608		0.206587	0.68551		0.632206	0.448833		0.13923	0.651186		0.200874	0.805517		0.0995667	0.803763		0.259176	0.524756		0.254713	0.636847		0.345769	0.766945		0.506817	0.529841		0.00686534	0.690686		0.406613	0.740738		0.0120619	0.767929
0.291222	0.696309		0.124011	0.770703		0.522405	0.589047		0.160439	0.66268		0.317008	0.459616		0.123212	0.664917		0.502912	0.469838		0.437419	0.634924		0.16142	0.801923		0.107583	0.806286		0.434286	0.536308		0.309786	0.612002		0.359409	0.761849		0.4149	0.591811		0.00632708	0.777427		0.397258	0.729097		0.0149256	0.721447
0.327265	0.671225		0.23521	0.770158		0.227873	0.608904		0.156441	0.703851		0.00682757	0.600795		0.15944	0.706342		0.472534	0.449922		0.539524	0.654374		0.186491	0.777691		0.100919	0.815456		0.688096	0.520326		0.144942	0.650527		0.350297	0.758505		0.316688	0.613753		0.0201344	0.78661		0.406696	0.721396		0.0602468	0.733372
0.676638	0.617702		0.130408	0.779184		0.0262407	0.626551		0.172041	0.685011		0.00925071	0.649232		0.0952322	0.746078		0.512062	0.4149		0.168645	0.635332		0.189023	0.82068		0.130697	0.769572		0.721012	0.545109		0.24635	0.629756		0.257389	0.789795		0.353552	0.588926		0.00887342	0.818654		0.420085	0.733617		0.0225324	0.723361
0.50424	0.607806		0.365524	0.7221		0.0405008	0.663766		0.179326	0.685573		0.0509081	0.626326		0.0439606	0.72653		0.534918	0.412521		0.0459449	0.722961		0.184341	0.796761		0.00754696	0.767617		0.667084	0.518598		0.405404	0.60302		0.0851686	0.804241		0.288899	0.598154		0.000978599	0.750084		0.467824	0.709216		0.0181706	0.766928
0.333027	0.705803		0.333207	0.74187		0.0173393	0.60305		0.141426	0.693565		0.0245249	0.616461		0.0106499	0.727598		0.530363	0.413034		0.187925	0.687465		0.204069	0.788661		0.016795	0.757958		0.674083	0.547238		0.0841647	0.681841		0.0262939	0.712736		0.295426	0.591365		0.018477	0.761459		0.45984	0.74342		0.00870425	0.792945
0.246829	0.708787		0.0961737	0.770521		0.0575012	0.862564		0.375207	0.76541		0.143632	0.643762		0.0546322	0.718423		0.146721	0.633654		0.151281	0.740905		0.200626	0.525644		0.0853616	0.796499		0.227395	0.622193		0.0710576	0.744056		0.0524445	0.814582		0.054916	0.7166		0.0282513	0.813429		0.147964	0.744393		0.0693069	0.812339
0.127769	0.727695		0.0904128	0.790125		0.0732102	0.881896		0.432151	0.765774		0.355655	0.625436		0.110181	0.723404		0.0987071	0.598039		0.0422204	0.719224		0.187199	0.669355		0.0393949	0.813527		0.181627	0.649423		0.547125	0.689116		0.0527312	0.812103		0.0574251	0.68083		0.0300837	0.873457		0.414903	0.805916		0.143342	0.837787
0.0237879	0.778118		0.196726	0.742498		0.285008	0.7844		0.364377	0.747769		0.154996	0.714558		0.0904232	0.726089		0.0425757	0.638017		0.0856296	0.691873		0.147493	0.705647		0.0579331	0.835466		0.235675	0.633326		0.112635	0.739187		0.00820181	0.780713		0.0622617	0.680554		0.0373771	0.870271		0.394104	0.796485		0.126261	0.821773
0.00750297	0.703556		0.194564	0.749511		0.111738	0.880256		0.383361	0.701637		0.123151	0.730623		0.017574	0.714817		0.044887	0.631409		0.0872696	0.72663		0.0930076	0.717401		0.0275183	0.848545		0.18365	0.641981		0.518458	0.729668		0.0323526	0.789777		0.0360517	0.744993		0.0278172	0.87521		0.317286	0.798241		0.0231477	0.733254
0.0419603	0.750566		0.288338	0.765848		0.155027	0.848567		0.24439	0.8011		0.0978339	0.795222		0.0851983	0.746678		0.0736015	0.59891		0.114388	0.687604		0.0615445	0.707774		0.00305721	0.875794		0.124142	0.645123		0.244704	0.710681		0.0149182	0.850303		0.148349	0.680467		0.0204215	0.879244		0.0408275	0.768822		0.133669	0.738257
0.0278914	0.802612		0.258039	0.777029		0.0888654	0.887084		0.0156667	0.807143		0.300329	0.638735		0.0164335	0.74329		0.0979817	0.598356		0.156431	0.706905		0.0761378	0.699889		0.0105298	0.84698		0.203154	0.629429		0.00731338	0.742287		0.0447328	0.844038		0.134349	0.703947		0.0381662	0.886956		0.251813	0.752418		0.114363	0.790829
0.0930115	0.767283		0.112606	0.751792		0.264263	0.838647		0.0642642	0.78292		0.162877	0.757133		0.0863895	0.718006		0.0676965	0.592911		0.0328256	0.715135		0.0501802	0.680945		0.0283225	0.874858		0.0639115	0.704494		0.0101764	0.766439		0.19444	0.840536		0.0993278	0.65943		0.0404659	0.882504		0.298672	0.773773		0.106292	0.794013
0.017535	0.725001		0.0951846	0.786868		0.0927741	0.884496		0.0767842	0.768627		0.0181599	0.699665		0.0724424	0.738693		0.288357	0.606053		0.398958	0.750931		0.0380342	0.68991		0.0197349	0.869777		0.0332507	0.7171		0.0322941	0.743519		0.318476	0.856412		0.0926032	0.734668		0.0349108	0.888691		0.186685	0.801058		0.112632	0.832137
0.0368999	0.715137		0.230022	0.726657		0.364147	0.683262		0.0882414	0.75609		0.0199834	0.740875		0.0320943	0.743622		0.248498	0.610424		0.0508518	0.734431		0.0193746	0.7559		0.0218689	0.85684		0.195441	0.624425		0.102863	0.760375		0.275725	0.825184		0.0558498	0.682146		0.00777713	0.907208		0.251262	0.771084		0.0194345	0.8039
0.0183135	0.770988		0.312278	0.720436		0.00952157	0.901657		0.0995237	0.776661		0.418468	0.629181		0.0522392	0.740215		0.106229	0.634674		0.0871327	0.747529		0.0462113	0.834722		0.0314927	0.873575		0.157889	0.619189		0.0942015	0.75237		0.0574135	0.833855		0.0361413	0.742822		0.0482677	0.917714		0.318504	0.722803		0.0599391	0.781039
0.0530804	0.734933		0.204358	0.789747		0.226003	0.836108		0.0251936	0.804697		0.132263	0.769036		0.0287833	0.779489		0.143522	0.623408		0.111754	0.754808		0.0246164	0.831678		0.0213869	0.903089		0.0289957	0.704463		0.0719232	0.705188		0.0604521	0.852041		0.183269	0.652353		0.0368783	0.926505		0.265755	0.792646		0.17105	0.751602
0.0507042	0.699511		0.00139907	0.805831		0.413029	0.689844		0.0954836	0.751213		0.307101	0.666161		0.00770271	0.763398		0.00968086	0.681629		0.175661	0.646799		0.0167373	0.812468		0.00520569	0.863182		0.0204174	0.732019		0.144479	0.755771		0.0476709	0.846669		0.12681	0.680018		0.0549034	0.928463		0.327185	0.77869		0.195948	0.744272
0.0598898	0.775683		0.155139	0.791942		0.161219	0.78984		0.0767515	0.770044		0.226512	0.655484		0.0576355	0.790681		0.0198904	0.63364		0.180783	0.780614		0.00203257	0.817008		0.0169791	0.892031		0.300001	0.643099		0.0702085	0.718532		0.122158	0.76101		0.109324	0.682132		0.0411744	0.935484		0.306329	0.714708		0.112522	0.74928
0.00702937	0.816745		0.0624246	0.798092		0.0513454	0.908971		0.0602493	0.766193		0.360188	0.647561		0.0342873	0.721137		0.0800859	0.625145		0.127212	0.76124		0.0619409	0.688		0.0233993	0.86491		0.172771	0.661115		0.33409	0.707115		0.0140984	0.844223		0.130441	0.654073		0.0267252	0.93063		0.382265	0.809018		0.197967	0.797617
0.000216071	0.706333		0.239916	0.747617		0.0976533	0.892338		0.0412518	0.827246		0.158859	0.753604		0.0223086	0.748528		0.0951479	0.637897		0.0750973	0.773366		0.0748196	0.808533		0.000164786	0.855628		0.116361	0.635064		0.0783099	0.724136		0.0344764	0.831608		0.113469	0.677273		0.0315513	0.935148		0.273259	0.822351		0.0501551	0.772196
0.0474567	0.730698		0.170548	0.740178		0.158187	0.862478		0.0505247	0.758748		0.01707	0.764946		0.0175879	0.736515		0.0010135	0.613982		0.118546	0.757491		0.0123164	0.834658		0.0364906	0.874338		0.0582561	0.694668		0.205575	0.694096		0.0178189	0.849956		0.155577	0.702114		0.0294739	0.925892		0.224374	0.831879		0.0785823	0.747658
0.0350045	0.677243		0.384846	0.718212		0.303203	0.830121		0.0773442	0.760787		0.0923784	0.656287		0.057814	0.757946		0.01271	0.671494		0.0991741	0.742484		0.0219265	0.793088		0.0319489	0.835108		0.225988	0.638443		0.149116	0.671645		0.0226917	0.800283		0.016395	0.703729		0.0153186	0.928216		0.173281	0.726401		0.109294	0.804538
0.0130664	0.740932		0.087996	0.844394		0.474305	0.66914		0.0699966	0.786692		0.108632	0.702257		0.0435928	0.76575		0.245022	0.657075		0.134481	0.754012		0.0260413	0.811061		0.0128914	0.881339		0.161428	0.6971		0.415098	0.740536		0.0433182	0.740823		0.0849732	0.698068		0.0311413	0.929048		0.150479	0.646165		0.012889	0.809977
0.00909507	0.703535		0.128364	0.786589		0.297954	0.696148		0.21527	0.749781		0.100273	0.730131		0.0165195	0.760814		0.132385	0.63376		0.0635211	0.77151		0.00299894	0.86402		0.0110027	0.871729		0.18317	0.637952		0.0103571	0.776588		0.343979	0.823354		0.147083	0.688445		0.018733	0.938643		0.241191	0.795662		0.0253996	0.832736
0			0			0			0			0			0			0			0			0			0			0			0			0			0			0			0			0
0.0530067	0.678079		0.0747964	0.823247		0.254981	0.786528		0.0196024	0.759346		0.00360701	0.74212		0.00568183	0.767085		0.0669618	0.663354		0.0512321	0.717142		0.0150174	0.84011		0.0413535	0.863504		0.255934	0.635733		0.0945906	0.726122		0.0909506	0.852981			0.698409		0.0170725	0.939202		0.320214	0.737999		0.0219823	0.793239
0.0502019	0.716984		0.0815761	0.701654		0.251281	0.780434		0.0694751	0.788035		0.055063	0.735091		0.0406946	0.726055		0.040213	0.653919		0.216965	0.726814		0.0616865	0.765967		0.0170797	0.856427		0.191421	0.698474		0.188251	0.695758		0.109358	0.811392		0.18438	0.725517		0.0283464	0.947141		0.338574	0.775311		0.0373604	0.839374
0.1217	0.789029		0.211063	0.74683		0.127242	0.865775		0.0492346	0.816776		0.00150932	0.796485		0.0629758	0.754087		0.025302	0.684583		0.0203757	0.750487		0.0171478	0.785117		0.0174228	0.798412		0.240967	0.649019		0.381896	0.661359		0.0359121	0.867558		0.00218665	0.654234		0.0109099	0.935775		0.375688	0.767309		0.0411241	0.820487
0.111715	0.720213		0.213731	0.70326		0.220215	0.849798		0.00359256	0.772525		0.211162	0.698645		0.088632	0.740125		0.144319	0.648278		0.175522	0.713686		0.0282586	0.796643		0.0657247	0.815592		0.0257418	0.718519		0.0974872	0.704401		0.182244	0.808169			0.699409		0.0287282	0.945032		0.0383988	0.765462		0.0251187	0.830888
0.0312894	0.730266		0.333771	0.703307		0.473386	0.659651		0.0637836	0.780753		0.196807	0.727786		0.0418115	0.743847		0.00278248	0.701868		0.166782	0.729097		0.0348923	0.857045		0.0745364	0.854531		0.208032	0.614533		0.512615	0.715292		0.0723761	0.898342		0.148227	0.669637		0.0137834	0.941097		0.16504	0.803442		0.00162248	0.805537
0.0170819	0.775987		0.157133	0.77634		0.486862	0.643193		0.100127	0.768298		0.201977	0.740685		0.0207391	0.761691		0.200661	0.642287		0.0740875	0.721083		0.0388206	0.843966		0.0553826	0.844478		0.119	0.700883		0.0194381	0.730711		0.103099	0.816396		0.0460927	0.642512		0.00287494	0.927343		0.373755	0.754036		0.0519944	0.816066
0.0830005	0.714968		0.218376	0.834654		0.489138	0.631208		0.0888494	0.775028		0.418836	0.647105		0.014889	0.740851		0.193061	0.633775		0.193823	0.715145		0.0470246	0.778245		0.0793715	0.817186		0.141036	0.686168		0.0111852	0.730035		0.0971972	0.847595		0.31063	0.692848		0.0268022	0.942973		0.385504	0.71202		0.00455433	0.84266
0.945873	0.542458		0.687497	0.832727		0.469864	0.687089		0.0568107	0.794295		0.107958	0.735363		0.0412723	0.716175		0.0344857	0.704134		0.313235	0.75558		0.00915983	0.858787		0.0410372	0.802126		0.207159	0.646633		0.0114029	0.771932		0.0601079	0.809378		0.215748	0.635393		0.0250444	0.927359		0.0673117	0.828879		0.027656	0.818843
0.886555	0.600916		0.596317	0.835252		0.460661	0.669021		0.0773685	0.763786		0.327084	0.723124		0.09512	0.722204		0.0942209	0.656686		0.0890102	0.736471		0.00893485	0.843199		0.0164547	0.815568		0.029826	0.723132		0.0808594	0.708746		0.132864	0.756591		0.0134709	0.656932		0.0110676	0.925131		0.347922	0.721422		0.0525963	0.786502
0.572178	0.693493		0.382298	0.815747		0.473261	0.649447		0.0575193	0.734531		0.0990595	0.688838		0.0401158	0.727659		0.288194	0.65106		0.0656858	0.735345		0.0247283	0.836725		0.00516168	0.848672		0.346741	0.600877		0.0285548	0.734723		0.0101828	0.79416		0.140015	0.705843		0.00644655	0.935396		0.327088	0.731411		0.00225691	0.814785
0.752321	0.650618		0.410634	0.75721		0.121281	0.688699		0.50415	0.713203		0.0572933	0.610775		0.224827	0.693227		0.88877	0.522347		0.107715	0.730929		0.123507	0.570554		0.102826	0.724261		1.00967	0.568348		0.0179761	0.733944		0.705006	0.684894		0.885566	0.571746		0.0567784	0.768221		0.0619972	0.628578		0.0997694	0.732972
0.650491	0.660509		0.722489	0.742572		0.173833	0.774113		0.656409	0.681741		0.0781098	0.681661		0.205812	0.721985		0.802237	0.508976		0.672442	0.724302		0.0356161	0.632986		0.118427	0.790311		0.98026	0.561455		0.13131	0.726449		0.312932	0.806411		0.913118	0.604295		0.0576818	0.775558		0.36021	0.726244		0.122719	0.769593
0.367938	0.685171		0.645559	0.743298		0.0397029	0.781057		0.554564	0.699206		0.328085	0.57305		0.156887	0.746642		0.714722	0.511447		0.138195	0.751357		0.142813	0.570595		0.125705	0.800756		0.955624	0.554203		0.25109	0.706557		0.241576	0.807786		0.830328	0.576367		0.0780111	0.766944		0.272239	0.744675		0.125183	0.790299
0.371143	0.737077		0.360792	0.755566		0.189779	0.753049		0.347826	0.722113		0.210603	0.699532		0.143171	0.686223		0.653685	0.470335		0.0444791	0.752093		0.0683363	0.571251		0.140623	0.828208		0.946849	0.535472		0.114297	0.699508		0.11403	0.788233		0.804402	0.533741		0.108964	0.776823		0.269426	0.735427		0.122038	0.770093
0.48153	0.713851		0.0107806	0.745434		0.316004	0.65841		0.387393	0.627434		0.283621	0.635477		0.165454	0.734448		0.677898	0.481644		0.22048	0.761747		0.145261	0.646118		0.150313	0.773625		0.957079	0.540879		0.193504	0.718237		0.133518	0.726649		0.536053	0.574882		0.10065	0.751688		0.234869	0.755937		0.130585	0.796394
0.378969	0.721596		0.00363821	0.758704		0.335929	0.616946		0.383358	0.698228		0.00702648	0.735415		0.0822538	0.69401		0.680681	0.472398		0.411754	0.70792		0.302053	0.649322		0.124476	0.787334		0.779944	0.544687		0.287842	0.666215		0.0612026	0.756968		0.948201	0.556449		0.0490176	0.789414		0.155518	0.743666		0.127124	0.760661
0.3619	0.730842		0.0979923	0.721167		0.361037	0.550808		0.631735	0.687412		0.103008	0.650915		0.175536	0.711549		0.660308	0.459605		0.386652	0.719071		0.269399	0.754727		0.134163	0.828372		0.949615	0.52238		0.0679581	0.697421		0.105737	0.7571		0.921846	0.598227		0.0186633	0.81185		0.174431	0.73612		0.126922	0.790682
0.339864	0.749379		0.0149385	0.729425		0.331861	0.654168		0.563425	0.704052		0.217606	0.679129		0.10531	0.733259		0.666841	0.464561		0.55745	0.704917		0.190257	0.786097		0.152416	0.828477		0.66064	0.545106		0.185296	0.701943		0.270428	0.785341		0.498245	0.579041		0.0415949	0.7946		0.167404	0.753633		0.0370453	0.740419
0.613307	0.65474		0.0368902	0.727616		0.258551	0.603737		0.492171	0.687139		0.315554	0.546243		0.0723356	0.707764		0.664862	0.471138		0.121038	0.736611		0.155409	0.773609		0.156724	0.834288		0.931247	0.528123		0.453707	0.667721		0.27178	0.790849		0.59848	0.546571		0.08185	0.798924		0.0683521	0.736334		0.0547679	0.763526
0.577351	0.66622		0.00605897	0.71541		0.176524	0.805877		0.474309	0.678721		0.0824972	0.71429		0.0170002	0.74598		0.676658	0.472582		0.102712	0.756487		0.105876	0.792323		0.133178	0.804591		0.625681	0.52568		0.0868923	0.667631		0.0491094	0.768145		0.321635	0.576032		0.0762059	0.787608		0.179404	0.751635		0.113253	0.716356
0.385198	0.659657		0.00307041	0.736935		0.010296	0.791184		0.473442	0.7099		0.128953	0.575674		0.0520338	0.68394		0.669021	0.461094		0.304756	0.728936		0.0771695	0.780832		0.13667	0.801315		0.746461	0.555066		0.149697	0.646688		0.0970373	0.803131		0.247008	0.627456		0.0528777	0.758931		0.207663	0.73411		0.150214	0.70994
0.324963	0.692768		0.279834	0.735624		0.34245	0.654683		0.474862	0.741347		0.460474	0.527263		0.0688809	0.750686		0.588663	0.472038		0.482133	0.695081		0.151153	0.807243		0.118061	0.785631		0.759508	0.466698		0.18328	0.676232		0.027157	0.775944		0.216956	0.597658		0.0739591	0.825816		0.232408	0.744367		0.240722	0.720914
0.378897	0.704854		0.450846	0.745927		0.263281	0.660126		0.468859	0.720862		0.10699	0.671716		0.0736592	0.72258		0.601717	0.463203		0.0511643	0.738039		0.142009	0.80866		0.121545	0.801615		0.70791	0.519517		0.410858	0.639649		0.10654	0.765453		0.50532	0.566412		0.0961545	0.815845		0.237613	0.743301		0.228717	0.734854
0.381315	0.716676		0.0422919	0.712527		0.275653	0.655083		0.448091	0.730083		0.0869097	0.708153		0.00705852	0.700388		0.606624	0.466007		0.0169588	0.742163		0.162971	0.749308		0.0955462	0.810777		0.683671	0.525863		0.390913	0.639223		0.0793713	0.773338		0.694748	0.612681		0.0889807	0.826364		0.227805	0.754117		0.16728	0.746357
0.412227	0.718699		0.048191	0.7255		0.307389	0.636208		0.453883	0.737876		0.300057	0.563949		0.0613302	0.691702		0.622598	0.444703		0.388047	0.747523		0.178447	0.72021		0.0987127	0.850224		0.873844	0.521096		0.0748337	0.653203		0.00275374	0.745692		0.47696	0.595823		0.0946375	0.808933		0.276612	0.702482		0.149628	0.731505
0.428433	0.652852		0.0303821	0.743694		0.316746	0.60096		0.434208	0.720898		0.350527	0.62194		0.060045	0.695676		0.618131	0.460302		0.482743	0.743224		0.153081	0.713209		0.102604	0.806991		0.841618	0.492609		0.259216	0.641529		0.157024	0.783548		0.562465	0.569089		0.099865	0.822588		0.281897	0.726161		0.078326	0.702458
0.370696	0.67977		0.0113086	0.726087		0.336849	0.611492		0.458848	0.71281		0.090884	0.711942		0.089263	0.731217		0.64991	0.473734		0.0162854	0.742804		0.174992	0.746406		0.213154	0.776295		0.608485	0.519743		0.152909	0.751666		0.109743	0.738437		0.673094	0.544573		0.0667566	0.793274		0.238568	0.746314		0.063958	0.704046
0.415764	0.675713		0.00449592	0.724508		0.228444	0.779399		0.408851	0.696254		0.111197	0.73528		0.0076862	0.715352		0.595525	0.449982		0.226494	0.73142		0.137819	0.755586		0.228415	0.794012		0.496464	0.511068		0.0266403	0.739966		0.176035	0.755608		0.712974	0.547158		0.00740447	0.809436		0.233442	0.72792		0.035698	0.751806
0.540703	0.655365		0.0113848	0.715578		0.189911	0.779614		0.406995	0.691836		0.347275	0.55289		0.0956562	0.709292		0.587626	0.448509		0.554593	0.633662		0.152313	0.759781		0.195799	0.791859		0.608075	0.518962		0.149446	0.711684		0.380565	0.780513		0.718351	0.563696		0.0622759	0.838696		0.186518	0.724069		0.0228177	0.719064
0.612499	0.591836		0.304764	0.732164		0.00166885	0.750892		0.400869	0.700769		0.414728	0.594435		0.100699	0.699883		0.570277	0.44856		0.391298	0.644715		0.161882	0.691898		0.139646	0.799057		0.565974	0.497605		0.0304071	0.748888		0.0795591	0.791331		0.324832	0.579424		0.0760386	0.827161		0.193702	0.708845		0.0343674	0.735042
1.00727	0.454847		0.626041	0.756753		0.0883497	0.80015		0.425791	0.690698		0.335891	0.617832		0.039563	0.742407		0.53479	0.436606		0.0354924	0.68918		0.191859	0.659924		0.0968092	0.743067		0.50077	0.515601		0.0983274	0.704383		0.0109144	0.789546		0.666325	0.595166		0.0529301	0.801933		0.196018	0.731329		0.0162546	0.721552
0.908409	0.512728		0.52845	0.727002		0.148509	0.723471		0.397608	0.701027		0.408131	0.582232		0.132081	0.701393		0.566435	0.44081		0.0209947	0.687395		0.182542	0.69536		0.0693657	0.807079		0.448038	0.542153		0.220082	0.706176		0.0327462	0.740517		0.500745	0.578131		0.0194077	0.804865		0.20511	0.696296		0.0432515	0.75092
0.459596	0.657703		0.200782	0.690406		0.307212	0.6639		0.420148	0.684678		0.200331	0.683797		0.0155224	0.716761		0.722205	0.454313		0.146444	0.730682		0.157921	0.749821		0.075201	0.785404		0.472742	0.501472		0.458234	0.643491		0.187182	0.792682		0.402288	0.532508		0.0264503	0.708104		0.206111	0.699463		0.0231369	0.742557
0.31516	0.709504		0.0198031	0.737481		0.251891	0.703402		0.381666	0.694335		0.31814	0.504319		0.0767133	0.672433		0.827842	0.473145		0.315305	0.684335		0.19588	0.72917		0.0783834	0.765039		0.382588	0.570451		0.111555	0.657463		0.0782919	0.765185		0.320867	0.544803		0.154046	0.659634		0.18632	0.723342		0.0193351	0.785026
0.299141	0.709374		0.0204243	0.734547		0.162339	0.739291		0.377349	0.696039		0.704025	0.537691		0.223106	0.670635		0.764591	0.47078		0.0757089	0.711456		0.197875	0.766164		0.088564	0.778833		0.442346	0.535754		0.244355	0.660232		0.00179013	0.751249		0.359734	0.589857		0.0255984	0.694401		0.165422	0.70715		0.0374615	0.82853
0.282126	0.715903		0.0043538	0.735899		0.224451	0.801122		0.37571	0.681735		0.417281	0.435944		0.139732	0.712436		0.635297	0.479866		0.373898	0.691074		0.158421	0.777303		0.0965808	0.805732		0.617457	0.51696		0.299429	0.650452		0.0154304	0.786298		0.267816	0.624777		0.0124059	0.783806		0.156067	0.714409		0.010474	0.796869
0.318169	0.693202		0.106846	0.717234		0.0700812	0.793476		0.371711	0.689305		0.1071	0.624483		0.142921	0.670505		0.604918	0.45284		0.476002	0.683662		0.183492	0.76024		0.0899161	0.787827		0.871267	0.522443		0.134585	0.647936		0.00631857	0.735571		0.169605	0.623454		0.00140134	0.788138		0.165506	0.708993		0.0856465	0.742217
0.667543	0.611873		0.00204331	0.716585		0.271713	0.709509		0.387311	0.691545		0.0910221	0.709336		0.0787127	0.689764		0.644447	0.43949		0.105124	0.693813		0.186024	0.796216		0.119694	0.774698		0.904182	0.530991		0.235993	0.667422		0.0865899	0.806831		0.206469	0.604296		0.0276064	0.805942		0.178894	0.699766		0.0479321	0.776309
0.495145	0.659421		0.23716	0.711875		0.338455	0.631523		0.394596	0.70896		0.151181	0.717904		0.0274411	0.707343		0.667303	0.423156		0.0175762	0.745631		0.181342	0.780577		0.00345572	0.778112		0.850254	0.525143		0.395047	0.61335		0.429147	0.748771		0.141816	0.614315		0.0177544	0.786515		0.226633	0.714263		0.0435702	0.754643
0.323932	0.742322		0.204842	0.714027		0.280614	0.675398		0.356697	0.692627		0.124798	0.699861		0.0271694	0.691352		0.662748	0.429781		0.124404	0.702587		0.20107	0.766085		0.0057923	0.765883		0.857254	0.514746		0.0738076	0.693425		0.370273	0.744588		0.148343	0.60183		0.0372101	0.795968		0.218649	0.731731		0.0341039	0.765444
0.299835	0.675525		0.17097	0.744265		0.312482	0.730952		0.355604	0.782017		0.147239	0.623792		0.0489504	0.75138		0.0797594	0.636903		0.100049	0.714887		0.215643	0.468801		0.0440081	0.806642		0.0285388	0.73119		0.165648	0.649647		0.0385061	0.802859			0.723906		0.0111788	0.823524		0.468177	0.739972		0.0473246	0.765391
0.180775	0.584974		0.165209	0.74831		0.18177	0.752053		0.412549	0.743822		0.359262	0.590414		0.104499	0.757333		0.0317453	0.644491		0.00901169	0.707151		0.202217	0.650145		0.00195854	0.823923		0.0743068	0.72922		0.641715	0.651116		0.0382194	0.79611			0.693882		0.0130112	0.876033		0.735116	0.752086		0.121359	0.825227
0.0767947	0.737929		0.271523	0.713101		0.0300278	0.787033		0.344775	0.748094		0.158603	0.709431		0.0847413	0.760024		0.0243861	0.64881		0.136862	0.641312		0.16251	0.686609		0.0165796	0.844478		0.0202595	0.73839		0.207225	0.62728		0.0827488	0.770831			0.63906		0.0203046	0.872539		0.714317	0.771211		0.104279	0.825134
0.0455038	0.718485		0.26936	0.747556		0.143243	0.790483		0.363759	0.762363		0.126759	0.659241		0.0232558	0.769582		0.0220748	0.647986		0.138502	0.676332		0.108025	0.739077		0.0138352	0.831599		0.0722845	0.75643		0.613049	0.659687		0.058598	0.806684			0.689982		0.0107448	0.871523		0.6375	0.752716		0.00116539	0.718541
0.094967	0.697972		0.363134	0.721422		0.0999534	0.732289		0.224787	0.755911		0.101441	0.772546		0.0795164	0.775251		0.00663966	0.6344		0.16562	0.66688		0.0765619	0.690055		0.0382963	0.85238		0.131792	0.749444		0.339295	0.611952		0.0760324	0.820381			0.657579		0.00334906	0.886547		0.279386	0.769521		0.155651	0.721299
0.0808981	0.744535		0.332835	0.73313		0.166115	0.799915		0.00393576	0.777612		0.303936	0.62215		0.0107517	0.75026		0.164944	0.569211		0.207663	0.693133		0.0911552	0.68328		0.0308236	0.866977		0.0527799	0.74527		0.0872772	0.657328		0.135683	0.838047			0.724165		0.0210938	0.892825		0.0684004	0.774697		0.0923805	0.817537
0.146018	0.6796		0.187403	0.765306		0.00928182	0.781075		0.0838666	0.758228		0.166484	0.687308		0.0807077	0.756255		0.000734669	0.565601		0.0840577	0.734013		0.0651976	0.674582		0.013031	0.839355		0.192023	0.703488		0.104767	0.707628		0.28539	0.800523			0.634573		0.0233934	0.88492		0.0215413	0.792072		0.0843098	0.857129
0.0705417	0.726186		0.169981	0.768371		0.162207	0.800263		0.0963866	0.76544		0.0217669	0.742443		0.0667605	0.774908		0.221395	0.66434		0.347726	0.697307		0.0530516	0.705967		0.0216186	0.832194		0.289185	0.650384		0.0622965	0.723311		0.409426	0.804881			0.736534		0.0178383	0.895282		0.133529	0.792251		0.0906498	0.85523
0.0161068	0.744613		0.304818	0.742202		0.109166	0.676754		0.107844	0.81254		0.0235904	0.732816		0.0264125	0.724796		0.181537	0.633514		0.102084	0.697311		0.00435723	0.771417		0.0194846	0.8533		0.0604934	0.800461		0.00827246	0.706539		0.366675	0.791945			0.637762		0.00929532	0.897883		0.0689513	0.766678		0.00254782	0.784937
0.0713203	0.691285		0.387075	0.689744		0.264502	0.789841		0.119126	0.782344		0.422075	0.605088		0.0465574	0.731054		0.039267	0.703493		0.138365	0.692357		0.0612287	0.84769		0.00986076	0.844989		0.0980453	0.732763		0.188792	0.710891		0.0335371	0.865807			0.723751		0.0311952	0.926352		0.00170911	0.789409		0.0819214	0.693511
7.36623e-05	0.676936		0.279155	0.7733		0.0289773	0.824998		0.044796	0.795851		0.13587	0.68342		0.0231015	0.779867		0.0765601	0.662485		0.162986	0.719279		0.0396337	0.812661		0.0199666	0.849653		0.226939	0.661332		0.0226674	0.703567		0.0304985	0.853206			0.69662		0.0198058	0.922645		0.0544588	0.789303		0.193033	0.700753
0.00230255	0.677128		0.0733973	0.801546		0.158048	0.702298		0.115086	0.776843		0.310708	0.596607		0.00202088	0.76633		0.0572809	0.631033		0.226893	0.633642		0.00171995	0.782212		0.0361478	0.808489		0.235517	0.65663		0.0498879	0.732588		0.0432797	0.839559			0.742543		0.0378309	0.936416		0.00697172	0.778056		0.217931	0.747584
0.112897	0.666726		0.229936	0.74941		0.093762	0.653347		0.0963539	0.777573		0.230119	0.650597		0.0519537	0.798043		0.0868522	0.654107		0.232015	0.697939		0.0129848	0.780834		0.0583325	0.83258		0.044067	0.759132		0.0243821	0.753546		0.0312069	0.791922			0.628381		0.024102	0.945671		0.0138847	0.757173		0.134504	0.753967
0.0459773	0.736521		0.137221	0.77623		0.203635	0.774439		0.0406469	0.769192		0.363795	0.595171		0.0286055	0.765128		0.0131241	0.629629		0.178445	0.699885		0.0469235	0.65689		0.0647528	0.837598		0.083163	0.737825		0.239499	0.715593		0.0768522	0.82024			0.651557		0.00965273	0.938363		0.702479	0.765733		0.21995	0.752949
0.0527907	0.75332		0.314713	0.715798		0.157327	0.823651		0.0608542	0.789886		0.162466	0.672011		0.0166267	0.775603		0.16211	0.578484		0.126329	0.727137		0.089837	0.810717		0.0415183	0.864494		0.139574	0.731599		0.0162807	0.763366		0.0564742	0.807667			0.708272		0.0144789	0.934012		0.593472	0.777137		0.0721374	0.753749
0.00555006	0.697686		0.245344	0.718151		0.0967933	0.802832		0.0701271	0.803939		0.020677	0.717425		0.0119061	0.745654		0.0679753	0.617746		0.169779	0.700318		0.0273338	0.871301		0.0778441	0.852814		0.197678	0.715327		0.110984	0.694439		0.108769	0.85261			0.67311		0.0124014	0.937439		0.544587	0.78474		0.100565	0.774116
0.0880112	0.634635		0.459642	0.692648		0.0482224	0.785309		0.0969466	0.803473		0.0959854	0.655863		0.0521322	0.800747		0.0796718	0.651907		0.150406	0.714837		0.0369439	0.80741		0.0733023	0.875009		0.029946	0.749727		0.0545258	0.683112		0.113642	0.803795			0.664948		0.00175388	0.93863		0.146932	0.754375		0.131276	0.763111
0.0660731	0.650708		0.0131997	0.863034		0.219324	0.685898		0.089599	0.765889		0.112239	0.739634		0.0379109	0.798542		0.17806	0.693035		0.0832492	0.659007		0.0410587	0.836803		0.0542449	0.829685		0.0945067	0.690807		0.509689	0.622717		0.134269	0.772592			0.706307		0.0140689	0.942452		0.169734	0.748449		0.00909329	0.79778
0.0439116	0.74155		0.203161	0.785084		0.042973	0.60338		0.195668	0.785263		0.10388	0.70027		0.0222014	0.744212		0.065423	0.727223		0.114753	0.715617		0.0120184	0.88732		0.0523561	0.870839		0.0727638	0.779977		0.104948	0.722796		0.434929	0.818912			0.616111		0.00166057	0.94094		0.0790228	0.816803		0.00341733	0.833789
0.0530067	0.678079		0.0747964	0.823247		0.254981	0.786528		0.0196024	0.759346		0.00360701	0.74212		0.00568183	0.767085		0.0669618	0.663354		0.0512321	0.717142		0.0150174	0.84011		0.0413535	0.863504		0.255934	0.635733		0.0945906	0.726122		0.0909506	0.852981			0.698409		0.0170725	0.939202		0.320214	0.737999		0.0219823	0.793239
0			0			0			0			0			0			0			0			0			0			0			0			0						0			0			0
0.00280486	0.723828		0.156372	0.782209		0.00370019	0.757513		0.0890775	0.76839		0.05867	0.672908		0.0463764	0.742109		0.107175	0.593833		0.165733	0.679012		0.0767039	0.72362		0.0242738	0.852734		0.0645131	0.709937		0.0936608	0.729258		0.0184073	0.819457			0.695197		0.0112739	0.953337		0.0183608	0.795269		0.0153781	0.874775
0.0686928	0.706379		0.28586	0.712268		0.127738	0.770667		0.068837	0.797278		0.00209769	0.736739		0.0572939	0.746402		0.0922638	0.609297		0.0716078	0.735236		0.0321651	0.826155		0.0587763	0.765441		0.0149674	0.768035		0.287305	0.738975		0.0550385	0.840841			0.64279		0.00616255	0.946109		0.0554747	0.809498		0.0191418	0.802446
[truncated: 2,377 more rows]

## Sheet: brain_observatory_1.1
Session ID:	743475441		Session ID:	750332458		Session ID:	750749662		Session ID:	751348571		Session ID:	754829445		Session ID:	755434585		Session ID:	756029989		Session ID:	757216464		Session ID:	757970808		Session ID:	758798717		Session ID:	759883607		Session ID:	760345702		Session ID:	760693773		Session ID:	762120172		Session ID:	762602078		Session ID:	763673393		Session ID:	791319847
[truncated: 402 more rows]
