# Supplementary material for: Contribution of behavioural variability to representational drift
Source: eLife journal article supplement (doi:10.7554/elife.77907), 2022-08-30

# Sample units with reliable stimulus responses

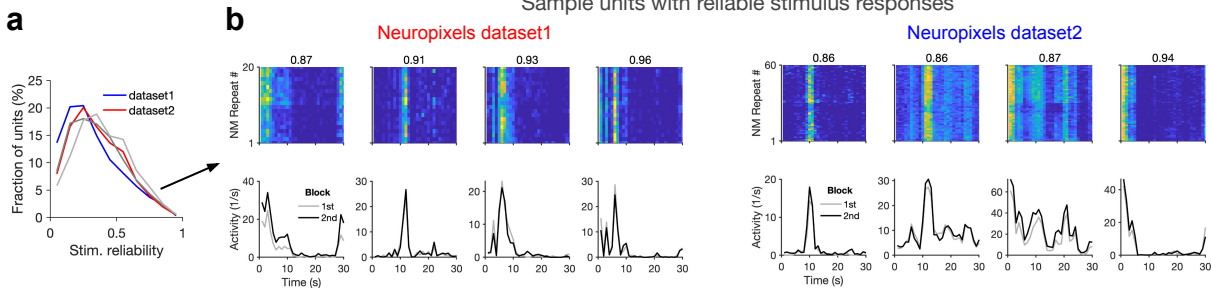

# Sample units with strong behavioral modulation

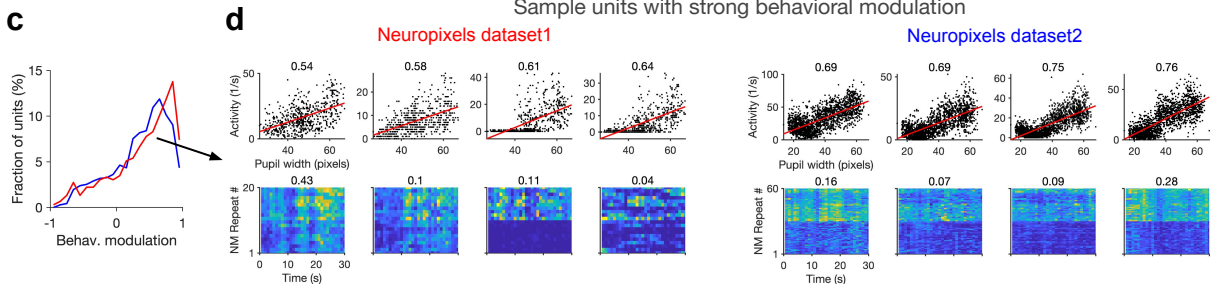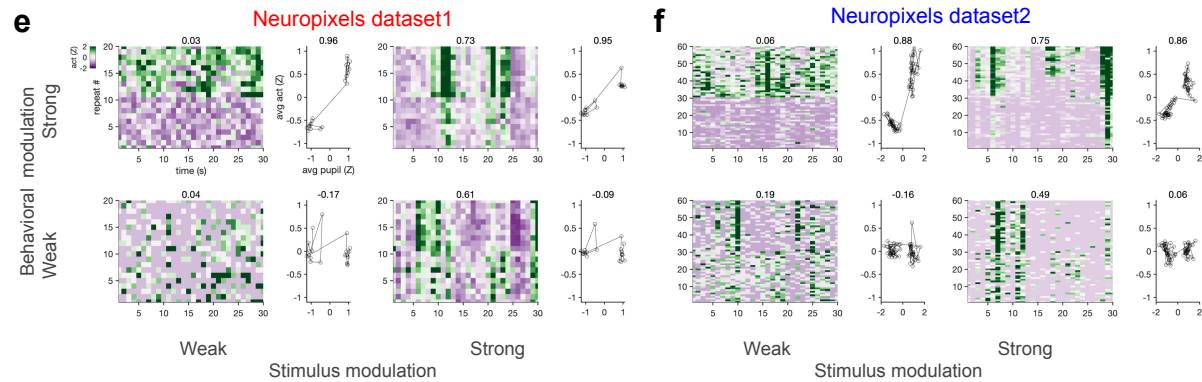

Supplement: supp [file elife-77907-supp-v1.zip › elife_poa_e77907_Figure_2_figure_supplement_2.pdf]
