# Supplementary material for: Contribution of behavioural variability to representational drift
Source: eLife journal article supplement (doi:10.7554/elife.77907), 2022-08-30
Supplement: supp [file elife-77907-supp-v1.zip › elife_poa_e77907_Figure_2_source_data_1.xls]

## Sheet: functional_connectivity
Session ID:	766640955		Session ID:	767871931		Session ID:	771160300		Session ID:	771990200		Session ID:	774875821		Session ID:	778240327		Session ID:	778998620		Session ID:	779839471		Session ID:	781842082		Session ID:	786091066		Session ID:	787025148		Session ID:	794812542		Session ID:	816200189		Session ID:	829720705		Session ID:	831882777		Session ID:	835479236		Session ID:	839068429
Stimulus reliability	Behavioural modulation		Stimulus reliability	Behavioural modulation		Stimulus reliability	Behavioural modulation		Stimulus reliability	Behavioural modulation		Stimulus reliability	Behavioural modulation		Stimulus reliability	Behavioural modulation		Stimulus reliability	Behavioural modulation		Stimulus reliability	Behavioural modulation		Stimulus reliability	Behavioural modulation		Stimulus reliability	Behavioural modulation		Stimulus reliability	Behavioural modulation		Stimulus reliability	Behavioural modulation		Stimulus reliability	Behavioural modulation		Stimulus reliability	Behavioural modulation		Stimulus reliability	Behavioural modulation		Stimulus reliability	Behavioural modulation		Stimulus reliability	Behavioural modulation
0.243913	0.784164		0.226276	0.664048		0.400779	-0.588099		0.264815	-0.578752		0.148589	0.545595		0.138217	-0.662641		0.129672	0.685337		0.103794	0.823649		0.66431	0.262157		0.659071	0.389862		0.062087	0.883721		0.23357	-0.0131132		0.118439	0.399242		0.00441576			0.108897	0.125823		0.122883	0.729177		0.720168	0.209877
0.251248	0.89223		0.0573355	0.897116		0.0996761	-0.215143		0.613419	0.713608		0.167121	0.371368		0.845907	0.286525		0.0881086	0.240411		0.0104257	0.449279		0.278469	0.614698		0.296117	0.713132		0.173673	0.839296		0.0191322	0.607172		0.0576309	-0.200331		0.000610602			0.116388	0.576283		0.0574358	0.682242		0.848026	0.361777
0.327275	-0.066859		0.177234	0.704033		0.661748	0.893368		0.186068	0.954841		0.245495	0.389137		0.845775	-0.0482455		0.222808	-0.567976		0.0780962	0.676849		0.456247	0.559031		0.0185429	0.183865		0.0813189	0.737705		0.101741	-0.50239		0.0422043	-0.22504		-0.00487986			0.16247	0.325247		0.0482627	0.868947		0.396919	0.59647
0.570697	0.778866		0.0480601	-0.219439		0.337255	0.28372		0.76651	0.825875		0.258762	0.852702		0.800474	0.662247		0.0960619	0.894683		0.298282	0.636116		0.577156	0.0791512		0.510737	0.79623		0.556621	0.836727		0.0194734	0.603987		0.163727	0.679706		0.0477643			0.753916	0.538487		0.0728674	-0.263031		0.389708	0.676459
0.388529	-0.655707		0.0905746	-0.687463		0.57227	0.903429		0.36793	0.19188		0.0382434	0.209399		0.918782	0.39752		0.553796	0.747973		0.313641	0.675006		0.680469	0.728058		0.775979	0.600831		0.0842348	0.529121		0.339227	0.734914		0.269453	0.692872		0.0038422			0.45063	0.356174		0.125836	0.399714		0.133473	0.158009
0.380502	-0.17884		0.108995	0.569905		0.669184	0.151964		0.132652	0.908634		0.703928	0.531868		0.537985	0.0729463		0.362428	0.881217		0.388247	0.650882		0.174346	0.75449		0.520011	0.676668		0.384742	0.930259		0.361609	0.689632		0.669262	0.484553		0.030832			0.860545	-0.0557565		0.0792376	-0.240785		0.232959	0.59472
0.354194	0.837004		0.176808	-0.0846906		0.4336	0.421727		0.191747	0.648643		0.246785	0.248145		0.133088	0.680561		0.518929	0.898978		0.622481	0.785875		0.247373	-0.273572		0.868787	0.885314		0.207435	0.941154		0.0974187	0.691213		0.632354	0.633922		0.0883386			0.658336	-0.413473		0.135629	0.332608		0.539842	0.601657
0.030525	-0.113495		0.191173	0.952473		0.291389	-0.769418		0.541853	0.753573		0.0698251	0.885245		0.779604	0.570308		0.159622	-0.600767		0.456282	0.788765		0.641479	0.634611		0.641789	0.425229		0.292309	0.915744		0.141096	-0.095922		0.118881	-0.124514		0.0835027			0.653046	0.798713		0.0905428	0.910955		0.235053	0.728825
0.02935	0.645631		0.0941951	0.592143		0.541987	0.89431		0.137359	0.798692		0.342611	0.865384		0.801973	0.238594		0.111444	0.935557		0.23041	0.200782		0.516145	-0.158973		0.36019	0.311867		0.323269	0.895364		0.0131313	-0.851343		0.0823089	-0.383977		0.074118			0.143523	0.519579		0.05396	0.724518		0.30047	0.122767
0.121528	0.804939		0.0527309	-0.166613		0.676745	-0.0406885		0.487062	-0.572897		0.205961	0.928864		0.103042	0.263124		0.466225	0.931434		0.549316	0.808114		0.314263	0.414406		0.487429	0.525454		0.0608585	0.56367		0.11936	-0.524569		0.511806	0.65957		0.250451			0.580665	0.612707		0.0538177	-0.560405		0.19431	0.587729
0.35478	-0.542064		0.0443347	0.659204		0.222345	0.776999		0.718572	0.804625		0.105822	0.250786		0.325203	0.541609		0.164128	0.919921		0.0859462	0.427951		0.314777	0.138792		0.349395	-0.285466		0.45726	0.922396		0.123965	-0.0607022		0.301303	-0.423368		0.434855			0.377087	0.693264		0.16565	0.791415		0.022924	0.0257298
0.0931193	0.885225		0.195154	-0.113301		0.160455	0.781143		0.0726905	0.748174		0.773265	0.269694		0.459213	0.00146944		0.318151	0.829504		0.291618	0.218338		0.750516	0.394488		0.460255	-0.239471		0.0958686	0.947714		0.178504	-0.356077		0.459615	0.475387		0.0764616			0.230184	0.518278		0.0698429	-0.503067		0.221827	0.000462417
0.30287	0.81847		0.0515464	0.551726		0.234427	0.894488		0.114658	-0.0152637		0.0483655	-0.337038		0.182308	0.477842		0.197798	0.934501		0.25883	0.913839		0.901177	0.424512		0.689628	0.599094		0.509725	0.940905		0.0363805	-0.692364		0.574772	-0.326069		0.145289			0.220225	0.0215933		0.110933	0.384505		0.802406	0.517854
0.484019	0.311024		0.0435477	-0.2801		0.883979	0.656819		0.124939	-0.491768		0.392967	-0.0187661		0.88793	0.327521		0.0567506	0.878447		0.169877	0.823924		0.35179	0.719182		0.76499	0.853133		0.0629533	0.352998		0.0899908	0.0637965		0.845494	0.408359		0.348037			0.87731	-0.385003		0.101239	0.0412471		0.298009	0.475929
0.429058	-0.111336		0.313682	0.332559		0.282695	0.774945		0.531396	0.876606		0.409467	0.096877		0.445202	0.476895		0.752369	0.860351		0.0995864	0.0143884		0.510751	0.694544		0.199305	0.578013		0.162183	0.880748		0.210763	0.176886		0.498632	0.684844		0.142305			0.856159	-0.152944		0.150818	-0.629395		0.184221	-0.0278768
0.0768629	0.572886		0.129521	-0.166156		0.126045	-0.464964		0.373675	0.31326		0.354508	0.872101		0.184047	0.396373		0.301165	0.965779		0.70022	0.591665		0.806465	0.374109		0.771888	0.800955		0.259429	0.864127		0.188893	0.717605		0.540737	0.548276		0.248239			0.253491	0.623032		0.026259	0.358792		0.119332	-0.0902629
0.650225	-0.494913		0.492598	0.336127		0.231335	0.0685563		0.343873	0.78976		0.0950431	0.184132		0.253622	0.232719		0.21907	0.895167		0.542404	0.608106		0.0299794	0.444268		0.515058	0.774115		0.508435	0.825926		0.178427	0.33478		0.526396	0.625856		0.0734518			0.675354	0.560007		0.225044	0.640787		0.382385	0.653345
0.575497	0.77742		0.359705	0.866619		0.257447	-0.0417295		0.537739	0.442376		0.400706	0.325228		0.183622	0.0503256		0.557212	0.939928		0.0562672	0.013558		0.88823	0.657689		0.700913	0.81946		0.233014	0.658591		0.200681	0.46026		0.569913	0.528847		0.0056187			0.614667	0.367485		0.0813493	-0.492516		0.584284	0.473174
0.557102	0.746248		0.393874	0.905351		0.599247	0.821938		0.464183	-0.655122		0.335175	0.397581		0.153068	0.0681953		0.170884	0.874558		0.0305524	-0.388912		0.179485	0.445461		0.680747	0.622997		0.160618	0.951146		0.153531	-0.0238351		0.595713	0.503891		0.0195459			0.841285	0.529444		0.11035	0.214297		0.164519	-0.1564
0.321438	0.776878		0.446548	0.898942		0.620158	-0.279863		0.421981	0.72532		0.148396	0.369778		0.287055	0.0649357		0.175338	0.848776		0.0628662	-0.234712		0.754633	0.693341		0.859751	0.311082		0.387128	0.718403		0.0225381	-0.726005		0.213377	-0.330207		0.0147935			0.616771	0.572455		0.095044	0.620082		0.572925	0.644551
0.168383	0.814144		0.192326	-0.416037		0.34882	0.941114		0.481836	0.820575		0.354891	0.391415		0.41126	0.0669892		0.277377	0.916715		0.535234	-0.298728		0.629203	-0.139132		0.337379	0.774487		0.151232	0.596918		0.0543053	0.866273		0.217639	-0.329084		0.384018			0.820315	0.446547		0.0951329	0.414786		0.283892	0.62381
0.220696	0.530683		0.13115	0.93842		0.431608	0.234254		0.48506	0.513702		0.347928	0.583488		0.246965	-0.128424		0.321487	-0.540496		0.142431	6.73205e-05		0.81125	0.723729		0.680723	0.644126		0.205537	0.935059		0.0525112	-0.638944		0.701582	-0.250801		0.254475			0.466106	-0.319263		0.075488	-0.300542		0.0780604	-0.146453
0.28551	0.836265		0.181925	0.935729		0.727446	0.159161		0.175157	0.603406		0.601491	0.657797		0.668913	0.610736		0.281265	0.80768		0.180033	-0.681289		0.389711	0.0537319		0.671446	0.789653		0.429101	0.861115		0.319494	-0.20486		0.291859	0.309791		0.283534			0.75321	0.577729		0.0878986	0.663121		0.605516	0.459307
0.550557	0.840474		0.612665	0.799011		0.382943	0.801587		0.424504	0.936478		0.563838	0.660592		0.120675	-0.00487104		0.716351	0.271755		0.156954	0.485438		0.411587	0.338148		0.537577	0.737398		0.330153	0.9587		0.184229	-0.447133		0.550936	0.510665		0.249662			0.406467	0.624218		0.364358	0.733559		0.225949	0.463633
0.151113	0.520802		0.325669	0.848658		0.421811	0.544095		0.56685	0.841904		0.353231	0.444861		0.079099	0.211474		0.266286	0.919633		0.160467	0.806935		0.648011	0.159108		0.684507	0.482109		0.244013	0.476629		0.181036	0.299935		0.461637	0.782918		0.257955			0.80311	-0.408601		0.537107	0.681226		0.477938	0.44779
0.54648	0.239304		0.389186	0.24123		0.554854	-0.154969		0.457067	0.182366		0.365365	0.659252		0.763863	0.372465		0.359933	0.640197		0.381999	0.418284		0.88013	0.565524		0.429033	-0.693911		0.357774	0.88068		0.574075	0.649101		0.667359	0.644507		0.116676			0.783721	0.164821		0.76599	0.519256		0.291505	0.569186
0.282453	0.283285		0.361084	0.677171		0.0318364	-0.303394		0.340899	0.188846		0.488254	0.686299		0.425885	0.0183106		0.059382	0.344956		0.725779	0.813897		0.714453	0.707054		0.555407	0.119248		0.0507266	-0.119867		0.0949174	0.593447		0.510259	0.771827		0.132235			0.408843	0.671469		0.306044	0.861304		0.442831	0.422717
0.459667	0.684411		0.163917	-0.399546		0.255245	0.5541		0.30487	0.0183303		0.258116	0.314278		0.516372	0.257893		0.451143	0.928385		0.401826	0.841999		0.766968	0.781069		0.647536	0.437914		0.260533	0.896934		0.386135	0.287169		0.171035	0.421371		0.2107			0.150476	0.684611		0.217245	0.916025		0.305042	0.32244
0.480339	0.799946		0.175985	0.846757		0.428371	0.961261		0.435609	0.869384		0.291189	0.587729		0.742313	0.720461		0.34631	0.927879		0.290411	0.815325		0.838784	0.747304		0.670195	0.818432		0.418236	0.715345		0.00664318	-0.674645		0.285903	0.329767		0.141671			0.390454	0.688243		0.676385	0.582667		0.513626	0.484132
0.481536	0.630064		0.320226	0.762229		0.16057	0.442529		0.314456	0.899698		0.186875	0.750414		0.657281	0.424555		0.365229	0.953986		0.281497	0.00555989		0.631911	0.48565		0.711311	0.86527		0.284367	0.942949		0.125164	-0.28628		0.461859	-0.0370436		0.444781			0.45604	0.545519		0.255083	-0.60871		0.764704	0.726929
0.204772	-0.704438		0.371668	0.89713		0.728025	0.93425		0.478992	-0.425209		0.436422	0.178692		0.588707	0.711576		0.374579	-0.899741		0.51318	0.679976		0.745047	0.420417		0.64577	0.860109		0.338032	0.905477		0.19838	-0.0967472		0.521669	0.648163		0.141242			0.614411	0.201356		0.155552	-0.596048		0.551392	0.636018
0.319174	0.637517		0.211677	0.47837		0.266652	0.395695		0.35305	0.417768		0.272926	0.542582		0.328649	0.36181		0.190653	-0.163465		0.685251	0.250505		0.83227	0.29842		0.30975	0.0753733		0.234398	-0.267373		0.0875196	-0.0101076		0.567657	0.588723		0.0161572			0.419076	0.0186576		0.184654	0.266049		0.517239	0.696336
0.180715	-0.566219		0.277846	0.899664		0.592051	0.843093		0.223508	0.70562		0.188928	0.218177		0.810252	-0.137576		0.391832	0.910605		0.232642	0.549271		0.491889	0.568888		0.655098	0.70677		0.317455	0.91619		0.401573	0.806644		0.454889	0.577969		0.224571			0.684376	0.0153887		0.0190311	-0.676357		0.674363	0.263026
0.664137	-0.391883		0.364854	-0.620465		0.249074	-0.289074		0.229087	0.784427		0.174732	0.654623		0.433984	0.00292611		0.242214	-0.486389		0.611481	0.0962474		0.65345	0.202469		0.47015	0.665814		0.186223	0.903181		0.0355264	0.391784		0.445166	0.705344		0.084425			0.317856	-0.188224		0.309485	0.770479		0.708008	0.700145
0.491356	0.249543		0.376647	0.903306		0.204676	-0.0192376		0.294462	0.916185		0.250855	0.410532		0.54174	-0.0746736		0.297887	0.839138		0.391162	0.797144		0.321566	0.446472		0.300117	-0.0598326		0.295899	0.886208		0.120983	0.323608		0.140521	0.642553		0.27827			0.282722	-0.607311		0.804469	0.545499		0.535486	0.71536
0.327939	0.576948		0.399097	0.753004		0.676361	0.658612		0.372982	0.344231		0.252183	0.787047		0.0890638	-0.109888		0.255113	0.94595		0.766395	0.657186		0.548586	0.205866		0.391737	-0.208863		0.180225	0.0996154		0.435257	0.600096		0.56566	0.512326		0.373413			0.596501	0.670221		0.435333	0.0826301		0.726563	0.554753
0.221549	0.699588		0.310139	0.736725		0.267283	-0.420408		0.185578	0.824139		0.504675	0.841373		0.792225	0.071262		0.193793	0.857129		0.655782	0.775899		0.667618	0.510859		0.134564	0.41888		0.303363	0.933665		0.272861	-0.0425373		0.492851	-0.194862		0.170904			0.276102	-0.465703		0.465526	0.927423		0.670155	0.669127
0.489215	0.647207		0.483074	0.912159		0.308227	0.381923		0.180681	0.530442		0.317023	0.67582		0.67248	0.51751		0.322132	0.425201		0.475811	0.181942		0.816084	0.268813		0.526472	-0.24275		0.243152	0.457528		0.203569	-0.152025		0.389872	0.0837428		0.253306			0.29346	-0.0941075		0.0854006	0.532221		0.524824	0.721004
0.437267	0.740636		0.406238	0.628903		0.385697	0.891726		0.210732	-0.374313		0.116371	0.8405		0.421726	0.152027		0.223297	0.328266		0.839153	0.8163		0.312515	0.696601		0.224509	0.660884		0.303809	0.449782		0.187543	-0.592687		0.422983	0.351562		0.130158			0.173478	-0.163041		0.407083	0.488352		0.528192	0.106535
0.479161	0.818788		0.501677	0.631684		0.245499	0.623149		0.0610401	0.331407		0.398968	0.433286		0.405334	-0.108769		0.357375	0.750918		0.172028	0.668464		0.556039	-0.0977155		0.291936	0.74133		0.126707	0.762679		0.225349	-0.294103		0.353719	0.14019		0.193291			0.267984	-0.34938		0.458583	0.862011		0.546987	0.159991
0.281451	0.66891		0.26133	0.61029		0.326209	0.32509		0.236166	0.90605		0.492112	0.393097		0.673087	0.568109		0.249766	0.680527		0.343091	0.732854		0.394499	0.635416		0.232013	0.276788		0.19222	0.197431		0.21627	0.386475		0.394424	0.555371		0.17505			0.0764769	0.521187		0.345933	-0.213659		0.288191	0.614802
0.202455	0.908409		0.525761	0.566275		0.255918	0.570671		0.113288	-0.0625101		0.479803	0.702204		0.838567	0.599853		0.244131	0.830002		0.365104	0.251945		0.616778	0.682274		0.188213	0.464315		0.276867	0.21374		0.111461	0.509327		0.252775	0.773209		0.312427			0.507408	0.143525		0.641098	-0.428698		0.629214	0.748607
0.318776	0.641537		0.539209	0.4097		0.522992	0.807156		0.10762	0.809702		0.264295	0.713573		0.601148	0.314927		0.282333	0.893837		0.742815	0.663514		0.658412	0.236083		0.739446	0.340322		0.469797	0.823543		0.142896	-0.696068		0.0186391	0.0840763		0.273145			0.664989	0.635826		0.333137	0.539456		0.378934	0.59898
0.130096	0.916374		0.200086	0.733335		0.431691	0.420685		0.506183	0.483164		0.306944	0.338551		0.699886	0.692428		0.12282	0.74188		0.697507	0.739873		0.362162	0.113386		0.263572	0.656203		0.151416	-0.424963		0.223671	-0.0468657		0.44767	0.458244		0.258624			0.438838	-0.449522		0.266834	-0.143474		0.268537	-0.489032
0.293462	0.372925		0.195026	0.62256		0.222115	0.712646		0.36512	0.862228		0.151846	0.484967		0.909077	0.143411		0.078587	0.734048		0.308676	0.669324		0.605365	0.510824		0.119141	0.690241		0.464348	0.86994		0.0227179	-0.159226		0.336076	0.502653		0.0526146			0.605992	0.591507		0.00909946	0.260851		0.580359	0.456089
0.17423	0.432209		0.152892	0.258072		0.298163	0.45707		0.159546	0.805686		0.22065	0.475735		0.595969	0.657717		0.126746	0.80586		0.674926	0.818561		0.574512	0.250592		0.108786	0.706327		0.0729174	0.944949		0.108847	0.325874		0.476395	0.434856		0.179622			0.591688	-0.731934		0.265561	0.404475		0.259584	-0.0832029
0.164137	0.388682		0.233293	0.349547		0.28079	0.586671		0.0931387	-0.294315		0.355125	-0.0540311		0.817156	0.31177		0.138925	0.570773		0.543299	0.604039		0.277001	0.624966		0.461276	0.870032		0.157923	0.832752		0.193502	0.261059		0.344738	0.767598		0.228021			0.21898	0.637815		0.300047	0.72533		0.457189	0.284172
0.0744068	0.665217		0.348703	0.718553		0.447107	0.733766		0.523145	0.67902		0.0932472	-0.424667		0.506539	-0.0501345		0.221059	0.247002		0.542666	0.830773		0.52407	0.445833		0.254346	0.381336		0.375807	0.865124		0.204167	0.470716		0.303111	0.000409165		0.107719			0.380783	0.0379288		0.330886	0.604277		0.206668	0.456829
0.33654	-0.519161		0.342536	0.3816		0.143458	0.754637		0.310053	0.693172		0.274854	0.21647		0.829671	0.308271		0.0969549	0.565871		0.32207	0.615327		0.323677	0.0927507		0.216018	0.446157		0.219111	0.340346		0.084968	-0.376397		0.507077	0.35147		0.0345862			0.641968	0.294068		0.255558	0.745094		0.27779	0.868941
0.316042	-0.654213		0.302984	-0.284642		0.160189	0.889788		0.121036	0.490692		0.593801	0.203239		0.85191	0.562733		0.135187	0.796895		0.561317	0.685231		0.441411	0.284435		0.113429	0.270115		0.168655	0.651803		0.175604	-0.448523		0.415882	0.608444		0.743059			0.126029	-0.401299		0.690177	0.865619		0.295176	0.14623
0.296809	-0.637599		0.357082	0.943969		0.232411	0.344807		0.197524	0.188801		0.340461	0.592183		0.291716	0.292351		0.1063	0.629366		0.583661	0.796871		0.220947	0.530837		0.936117	0.603741		0.248479	0.404193		0.0531958	0.0218012		0.280609	0.464855		0.647934			0.0863432	0.0213822		0.429027	-0.354396		0.279635	0.062146
0.20247	0.388584		0.0726938	-0.299002		0.262434	0.635482		0.311224	0.790712		0.208752	0.823675		0.582094	0.283481		0.31842	0.852254		0.538661	0.773394		0.55072	0.149629		0.252176	0.0976675		0.0997547	0.505031		0.169915	-0.214479		0.387949	0.359445		0.0300425			0.493787	0.531221		0.770261	0.79932		0.127597	0.529629
			0.187016	-0.756998		0.177153	0.628827		0.0965667	0.349639		0.045358	0.531557		0.168896	-0.00103315		0.100041	0.76663		0.482682	0.165164		0.262555	0.389096		0.252739	0.478392		0.225312	0.864965		0.270621	0.593503		0.510027	0.580274					0.421501	0.099028		0.624738	0.740836		0.224602	0.400579
			0.466033	-0.404401		0.331535	0.254196		0.15952	0.499715		-0.00313959	0.449596		0.615517	-0.162122		0.308763	0.754959		0.299622	0.69927		0.430656	0.453822		0.23186	0.574897		0.438708	0.144281		0.224773	0.267322		0.178185	0.524084					0.342988	0.0169634		0.323784	0.773761		0.438854	-0.120833
			0.459744	-0.517238		0.238827	0.182858					0.316779	0.782707		0.18864	0.346066		0.371037	0.845532		0.454594	0.40839		0.370866	0.22722		0.268726	0.553198		0.274917	0.787065		0.203403	0.810345		0.346565	0.388647					0.701645	0.131321		0.512513	0.650077		0.15817	0.262302
			0.238566	0.710559		0.234154	0.26425					0.0836554	0.744653		0.724029	0.32784		0.165744	-0.269127		0.465949	0.0514157		0.410479	0.552429		0.224312	0.549656		0.13277	-0.705402		0.143381	-0.0408225		0.268238	-0.397342					0.0551737	0.653316		0.269227	0.584891		0.17234	0.80203
			0.228513	0.663146		0.130027	0.708677					0.321061	0.763389		0.454117	0.0885746		0.298176	0.607338		0.193202	-0.511989		0.167878	0.443336		0.4972	0.649797		0.36011	-0.6219		0.0840668	-0.359736		0.317856	0.253068					0.179421	0.391598		0.487692	0.662759		0.176965	0.216046
			0.341542	0.299875		0.0510366	0.609185					0.187953	0.172493		0.34759	0.294063		0.476518	0.517728		0.40179	0.597179		0.458234	0.142167		0.139057	-0.463299		0.109452	0.914513		0.141581	-0.372249		0.213274	-0.00743024					0.12955	0.550559		0.498529	0.710318		0.0685852	-0.0326548
			0.219593	0.143827		0.147249	0.802667					0.326712	-0.340743		0.557264	-0.11171		0.288854	0.590677		0.305023	0.231061		0.299545	0.406027		0.288037	-0.329519		0.0701763	-0.899054		0.0487488	-0.351005		0.253774	0.110946					0.772295	0.52197		0.293393	0.65102		0.180885	0.131938
			0.260787	0.151628		0.0814755	0.736853					0.713026	0.57153		0.542354	0.567253		0.352103	0.354912		0.513659	0.805775		0.22987	0.330116		0.120516	0.378234		0.201565	0.110497		0.0965524	-0.270049		0.452265	0.378355					0.525581	-0.393137		0.196504	0.591109		0.383199	0.530847
			0.323856	0.908722		0.077704	0.769117					0.226709	0.295571		0.165336	0.428011		0.492062	0.0581708		0.342356	0.613335		0.359575	-0.110579		0.371626	0.527161		0.0595257	0.820819		0.242462	0.833722		0.0703762	-0.546786					0.343421	-0.185955		0.563729	0.786225		0.472743	0.227536
			0.0930605	0.0275043		0.143194	0.242044					0.377345	0.489591		0.120754	-0.186746		0.138712	0.837758		0.326604	0.530598		0.281223	0.546267		0.335793	0.764432		0.0566171	0.780532		0.299318	0.294118								0.352549	0.500517		0.314376	0.582511		0.340859	0.435677
			0.283977	0.115033		0.0892389	0.200915					0.315122	0.641332		0.145207	0.332331		0.313653	0.721504		0.289592	0.259163		0.377249	0.0436808		0.261989	0.386465		0.0938003	0.920694		0.259693	-0.196126								0.282468	0.413442		0.479735	0.824623		0.63961	0.0435732
			0.21223	0.484132		0.101701	-0.120531					0.328565	0.362286		0.308919	0.226592		0.255548	0.819154		0.412133	0.737486		0.210855	0.515889		0.724094	0.326901		0.123535	0.767831		0.0830135	-0.539286								0.289077	-0.313053		0.236558	0.702838		0.30188	0.61323
			0.187315	0.131606		0.66201	0.284196					0.107932	0.53938		0.207742	0.492819		0.265591	-0.825657		0.246504	0.0956948		0.564485	0.545578		0.162673	0.302486		0.0731587	0.837271		0.132593	-0.22021								0.180724	0.178165		0.341725	0.676796		0.53321	0.391374
			0.445017	0.34031		0.159863	0.681155					0.497359	0.0847363		0.174148	0.687845		0.147226	0.716098		0.387764	-0.108304		0.739423	0.141862		0.469165	0.384136		0.325612	0.700132		0.242055	0.760398											0.437336	0.279714		0.280279	0.725715
			0.464265	0.0434625		0.147854	0.903339					0.0485073	0.797407		0.122856	0.296519		0.0959105	0.518785		0.245231	0.0112087		0.446003	0.6488		0.32728	0.708491		0.0753776	-0.263721		0.152349	-0.108937											0.151777	0.569679		0.224611	-0.02077
			0.427421	0.547986		0.38908	-0.400316					0.253855	0.735973		0.110687	0.190923		0.204007	0.784062		0.258159	0.486662		0.407935	0.531087		0.232747	0.592676		0.200942	0.917394		0.251895	0.249559											0.350201	0.464483		0.374903	0.497799
			0.41801	0.476872		0.366684	0.200162					0.0818496	0.522348		0.19393	0.56803		0.519174	0.893648		0.24897	-0.216468		0.427752	0.38324		0.415424	0.34879					0.102569	-0.440067											0.551954	0.758248		0.207228	0.337353
			0.234499	0.0803789		0.340362	0.622153								0.204399	0.292071		0.142771	0.684869		0.11258	0.849071		0.213681	0.45832		0.10094	-0.473506					0.128908	0.178705											0.416616	0.440122		0.131779	-0.423095
			0.467153	0.489447		0.585313	0.407808								0.278297	0.321336		0.208633	0.726759		0.294283	0.340131		0.4214	0.591906		0.161696	0.338114					0.62073	-0.261333											0.155283	0.682483		0.203256	0.69603
			0.128245	0.634649		0.601634	0.0842529								0.0350467	0.467152		0.179458	0.885296		0.492837	0.555466		0.428034	0.663193		0.503063	0.49591					0.292915	-0.0838744											0.811544	0.510412		0.385981	0.558532
			0.224976	0.0611479		0.153478	0.366927								0.669529	0.325202		0.319423	0.431922		0.164545	0.901857		0.257311	0.618236		0.43144	0.866122					0.735073	0.468361											0.896166	0.677196		0.252383	-0.166631
			0.190066	0.544723		0.157519	-0.0243009								0.0849754	0.545892		0.072168	0.280807		0.271081	-0.152337		0.294037	0.731884		0.104122	0.15695					0.250899	-0.502785											0.207637	-0.513981		0.20298	0.450906
			0.245883	0.107535		0.300975	0.878222								0.333419	0.256267		0.173851	0.901367		0.300689	0.446711		0.227136	0.694336		0.0458923	0.243433					0.0433451	-0.604394											0.0896156	0.201169		0.77858	0.0680423
			0.545589	-0.413242		0.352492	0.505605								0.122536	0.288942					0.546588	0.735486		0.551584	0.480497		0.15191	0.58598					0.090466	-0.693547											0.243737	0.333562		0.173803	-0.300917
			0.693137	-0.0964177		0.25245	0.717586								0.418474	0.352333					0.327785	0.200016		0.392848	0.754232		0.455243	0.822348					0.131699	-0.485936											0.721529	0.522981		0.0769863	-0.584828
			0.403986	0.394062		0.176045	-0.00959284								0.485226	0.483417					0.141686	0.645752		0.650008	0.517875		0.698446	0.325509					0.105473	-0.346937											0.773013	0.416216		0.204347	0.605186
			0.62129	0.526506		0.460904	0.748638								0.296092	0.421791					0.352519	0.643496		0.444839	0.697258		0.0944407	0.480781					0.0584899	-0.547503											0.132677	0.171314		0.773226	0.562532
			0.345392	0.712634		0.412982	0.470654								0.0922449	-0.0334313					0.0898858	-0.485596		0.0992827	0.521215		0.200076	-0.0204805					0.0485897	-0.346902														0.563837	-0.362038
			0.448346	0.780046		0.290804	0.609665								0.0521058	0.65155					0.301994	0.587734		0.32694	0.517564		0.85809	0.472403					0.0203501	-0.50514														0.176054	0.52813
			0.304124	0.57081		0.2107	0.108308								0.182976	0.586585					0.331492	0.697741		0.109671	-0.243698		0.232867	0.182998					0.278309	-0.334896														0.209987	0.523448
			0.325158	0.842476		0.097458	0.410966								0.216807	0.615755					0.457219	0.573142		0.399577	0.132487								0.0510623	-0.459741														0.27274	0.461697
			0.208002	0.650987		0.0550266	0.439004								0.173816	0.543263					0.275681	0.904753											0.293226	-0.428672														0.392968	-0.260268
			0.0896941	0.679348		0.286919	0.306002								0.910883	0.376133					0.240266	0.25398											0.0015979	-0.589861														0.206367	0.507903
			0.0814954	0.20467																	0.731989	0.614864											0.119563	-0.258578
			0.533573	0.790712																	0.290063	0.628843											0.136779	0.257012
			0.155728	0.459682																	0.549535	0.290359											0.0357533	-0.601324
			0.154732	-0.52258																	0.283828	0.645659											0.0738577	-0.525001
			0.0660982	-0.0418678																	0.576287	0.70119											0.122904	-0.385936
			0.0455356	-0.61585																	0.300461	0.526465											0.17697	-0.454165
			0.0394909	0.477544																	0.492964	0.85481											0.245197	0.833045
			0.154868	0.228505																	0.0859503	0.0174471											0.0299092	0.336884
			0.164857	0.426442																	0.380754	0.408927											0.220269	-0.601245
			0.353262	0.598928																	0.500689	-0.0812898											0.332303	-0.349235
			0.317682	0.687776																	0.161447	-0.0166728											0.0539823	-0.559526
			0.169766	0.342141																	0.599041	0.803647											0.131551	-0.522784
			0.222403	0.558498																	0.204495	0.380993											0.0962912	-0.562082
			0.0692766	-0.0116076																	0.718239	0.645561											0.185974	-0.120624
			0.026436	0.265812																	0.157209	0.580114											0.0721905	-0.528566
			0.0311388	-0.393135																	0.139673	0.487511											0.12182	-0.246397
																					0.299715	0.351903											0.109266	-0.604053
																					0.295763	0.457553											0.237292	-0.170315
																					0.46601	0.749758											0.0642196	0.0541368
																					0.196022	0.46871											0.113615	-0.419924
																					0.0205898	-0.585447											0.0187801	-0.615916
																					0.520901	0.556636											0.0183092	-0.249071
																					0.139962	0.147631											0.250742	0.210107
																					0.140723	0.771409
																					0.362207	0.691861
																					0.0562282	0.39979
																					0.198393	0.290957
																					0.0826771	0.296701
																					0.187047	0.400458
																					0.0280559	0.340807
																					0.091578	0.321567
																					0.0311174	0.257232
																					0.260408	-0.325272
																					0.339619	-0.156039
																					0.225344	0.514139
																					0.266707	0.091044
																					0.154273	0.284124
																					0.173716	0.318305
																					0.264879	0.55079
																					0.122939	0.545487
																					0.49711	0.245751

## Sheet: brain_observatory_1.1
Session ID:	743475441		Session ID:	750332458		Session ID:	750749662		Session ID:	751348571		Session ID:	754829445		Session ID:	755434585		Session ID:	756029989		Session ID:	757216464		Session ID:	757970808		Session ID:	758798717		Session ID:	759883607		Session ID:	760345702		Session ID:	760693773		Session ID:	762120172		Session ID:	762602078		Session ID:	763673393		Session ID:	791319847
Stimulus reliability	Behavioural modulation		Stimulus reliability	Behavioural modulation		Stimulus reliability	Behavioural modulation		Stimulus reliability	Behavioural modulation		Stimulus reliability	Behavioural modulation		Stimulus reliability	Behavioural modulation		Stimulus reliability	Behavioural modulation		Stimulus reliability	Behavioural modulation		Stimulus reliability	Behavioural modulation		Stimulus reliability	Behavioural modulation		Stimulus reliability	Behavioural modulation		Stimulus reliability	Behavioural modulation		Stimulus reliability	Behavioural modulation		Stimulus reliability	Behavioural modulation		Stimulus reliability	Behavioural modulation		Stimulus reliability	Behavioural modulation		Stimulus reliability	Behavioural modulation
0.0978166	0.89584		0.226649	0.416648		0.00896295	-0.381582		0.145392	0.941841		0.212896	0.814147		0.214716	0.845776		0.522106	-0.437695		0.170281	0.934		0.500175	0.806005		0.207187	0.165945		0.284587	-0.804664		0.124674	0.863154		0.243104	0.606806		0.273576	0.567416		0.477793	0.816427		0.0218288	0.508544		0.470538	0.612185
0.0987311	0.957787		0.198786	-0.39256		0.267124	0.3584		0.355371	0.62392		0.394784	0.397015		0.205155	-0.13463		0.189055	-0.454054		0.113694	0.29716		0.453921	0.350684		0.106479	0.272459		0.0504391	-0.660869		0.0131338	0.932532		0.373827	-0.0952127		0.358114	-0.312067		0.413137	0.734807		0.22306	0.574832		0.214062	0.691569
0.266296	0.865755		0.432303	-0.295182		0.599451	0.768621		0.38017	-0.617459		0.258774	0.880077		0.48622	0.129688		0.870649	0.42104		0.311913	0.909607		0.185216	-0.390865		0.261996	-0.108098		0.331544	0.975274		0.0327691	0.802731		0.820363	0.0135937		0.805558	0.131195		0.763594	-0.346241		0.48459	0.777001		0.72691	-0.41256
0.120165	0.926211		0.438865	0.915093		0.436229	0.708777		0.0153401	0.605133		0.250161	-0.28772		0.112164	-0.338272		0.300506	0.711922		0.010931	-0.126502		0.29563	0.914968		0.148828	-0.635556		0.620968	0.892849		0.492569	0.873531		0.459525	0.386043		0.0344997	0.621771		0.735594	0.753969		0.187786	-0.627769		0.42196	0.329699
0.232978	0.438065		0.200357	-0.0337162		0.076134	0.694593		0.0250404	0.762155		0.776134	0.357252		0.570803	0.711974		0.368146	0.845951		0.538336	0.41437		0.720492	0.742549		0.491666	0.036081		0.378744	-0.500808		0.294987	-0.685917		0.176733	0.462027		0.25206	0.493821		0.522975	0.791838		0.0493367	0.0314643		0.647976	-0.498134
0.38353	0.459453		0.00961127	-0.389142		0.401296	0.600519		0.383485	0.922423		0.279841	0.908633		0.107834	0.509556		0.0533558	0.562016		0.291965	0.819111		0.317651	0.626154		0.304192	0.270826		0.116259	0.954787		0.0510404	0.712863		0.729892	0.179196		0.821465	0.323455		0.324562	-0.611912		0.290423	-0.48545		0.245166	-0.830225
0.301959	0.907262		0.0628108	0.94955		0.229331	0.693931		0.0815682	0.0903609		0.0871878	0.33312		0.352872	-0.0857292		0.182143	0.856981		0.173094	0.581182		0.179476	0.409425		0.549294	0.447572		0.201573	0.91358		0.0622081	0.801503		0.659235	0.487226		0.284123	0.396729		0.335674	0.794971		0.265888	-0.196157		0.0917855	0.445627
0.297432	0.804681		0.329306	0.313478		0.350082	0.615996		0.440262	0.662107		0.194551	-0.241421		0.146299	0.864563		0.145479	0.861012		0.0573926	0.605217		0.189268	0.871823		0.273206	0.453782		0.439824	0.992469		0.260325	0.338242		0.862021	0.641242		0.0883414	-0.379778		0.285513	0.914137		0.244624	0.617582		0.0227593	0.456561
0.306567	0.461728		0.0546581	0.0699364		0.568443	0.770399		0.0901749	-0.244863		0.0168957	0.560181		0.00206339	-0.177439		0.0537775	0.76735		0.294791	0.666739		0.258395	0.470936		0.236637	0.414812		0.482993	0.947017		0.116958	0.774746		0.817745	0.606372		0.880393	0.698999		0.58535	0.826238		0.469167	-0.744652		0.12623	0.715639
0.223972	0.951627		0.225351	-0.900836		0.351168	0.669764		0.438388	0.806285		0.0890118	0.133391		0.430286	0.593696		0.666992	0.421533		0.0750544	-0.468384		0.511735	0.651432		0.223769	0.555158		0.503907	0.937013		0.80657	0.855707		0.744948	0.0748975		0.383106	0.279542		0.488214	0.532414		0.11903	0.297559		0.721062	0.82477
0.428511	0.772959		0.422796	-0.622039		0.383991	-0.190971		0.268545	-0.694668		0.869446	0.874844		0.253467	0.916066		0.201439	0.876548		0.199284	0.913621		0.384847	0.95463		0.393665	0.546466		0.635143	0.958351		0.425084	0.799077		0.696503	0.748487		0.752809	0.297598		0.428418	0.891117		0.12149	-0.403677		0.243634	0.827984
0.424897	0.744643		0.243157	-0.113954		0.29487	0.471885		0.258587	0.699131		0.479547	0.924219		0.213415	0.647861		0.639814	0.243003		0.240048	0.94877		0.238388	0.852246		0.386634	-0.0493336		0.349936	0.959922		0.408711	0.109668		0.92857	-0.519601		0.535725	0.883903		0.712672	0.934308		0.156962	-0.198681		0.522551	0.590126
0.409653	0.83798		0.455179	0.818222		0.158731	0.700135		0.263608	-0.147062		0.525534	0.697947		0.264173	0.856143		0.492492	-0.295797		0.238152	0.894285		0.58284	0.5156		0.12983	0.625683		0.0302834	0.957549		0.487117	0.886532		0.523175	0.476198		0.551802	-0.270731		0.153933	0.597915		0.307034	0.508717		0.447828	0.837632
0.288007	0.167733		0.871108	-0.0591558		0.227362	0.320715		0.310511	-0.693272		0.245339	0.250438		0.425646	0.869154		0.442112	0.516409		0.168652	0.899146		0.510616	0.727536		0.293962	0.388404		0.385117	0.504628		0.728715	0.797045		0.134726	0.782728		0.232422	0.112936		0.192866	-0.130902		0.218392	0.906748		0.576853	0.927586
0.303415	0.483191		0.705957	-0.490975		0.232622	0.704454		-0.00929022	-0.393764		0.563355	0.515534		0.786139	-0.504527		0.683848	0.136173		0.214208	-0.534131		0.376016	0.616802		0.438028	0.229083		0.402947	0.881815		0.357264	0.784328		0.566037	0.783489		0.757939	0.757899		0.461912	0.816531		0.696335	0.579433		0.537375	0.49469
0.256662	0.936979		0.113964	-0.14023		0.516075	0.835351		0.280222	-0.427112		0.0345873	0.394727		0.241543	-0.810357		0.502468	0.876193		0.446417	-0.0387895		0.618552	0.506041		0.440732	0.447257		0.194433	0.942001		0.180127	0.911908		0.153216	-0.351109		0.3282	0.295345		0.808284	0.966998		0.279581	0.124199		0.100929	0.793566
0.22398	0.268075		0.318452	-0.428403		0.135478	-0.373235		0.255088	0.928915		0.822648	0.525008		0.166388	0.748204		0.497851	0.867129		0.320755	0.550273		0.635762	-0.638457		0.178319	-0.110938		0.0428303	-0.174449		0.631333	0.430473		0.0901066	0.345321		0.632079	0.524578		0.603287	0.844617		0.49174	0.585483		0.145873	0.860299
0.406314	0.405964		0.690864	-0.45479		0.16636	0.0820492		0.370844	0.777064		0.380735	0.847564		0.668482	0.654366		0.355082	0.904532		0.0632679	0.153981		0.522881	0.788229		0.188476	0.280361		0.124356	0.912715		0.204854	0.422634		0.383972	0.0725653		0.0779285	0.506346		0.618407	0.693902		0.314349	0.213623		0.50882	0.570589
0.225023	0.829655		0.547705	-0.670653		0.244662	0.653372		0.350834	-0.400353		0.496774	0.117875		0.338166	0.0556443		0.453624	0.392264		0.646542	0.938403		0.0687238	0.930567		0.475063	0.467898		0.729974	0.947369		0.181352	-0.240374		0.548589	-0.273239		0.190042	0.764649		0.627923	0.561806		0.00110797	0.3856		0.509308	0.924099
0.323	0.409033		0.0601897	0.78236		0.289669	0.724676		0.572093	-0.225101		0.893405	-0.258495		0.381651	0.794185		0.795599	0.708644		0.236411	0.833842		0.262666	0.81365		0.27992	-0.140507		0.144608	0.157035		0.401644	0.940147		0.333491	0.245417		0.767698	0.690831		0.605532	0.574715		0.194213	0.255481		0.265078	0.812034
0.0906836	0.971722		0.503719	0.825521		0.578174	0.82302		0.244851	0.819775		0.611064	0.879404		0.103435	0.808403		0.630662	0.71104		0.302833	0.368881		0.310966	0.836028		0.07193	0.24458		0.461516	0.964201		0.234416	0.779023		0.441044	0.540939		0.798221	0.839983		0.0948169	0.22816		0.136732	0.0766652		0.826159	0.849985
0.15749	-0.535784		0.361937	-0.068547		0.580882	0.850729		0.448972	-0.266855		0.674588	0.300904		0.363473	0.869256		0.322892	-0.48146		0.211998	0.267223		0.600787	0.493989		0.457426	0.0334245		0.613891	-0.0884641		0.301285	0.16077		0.7342	0.0759404		0.511656	-0.260405		0.500466	-0.0311765		0.412059	0.678341		0.110807	0.516363
0.228707	-0.0590975		0.843562	0.693987		0.596741	0.111053		0.17522	0.715898		0.757975	0.914455		0.271592	-0.386101		0.621812	0.703605		0.357762	0.745727		0.538566	-0.312836		0.472065	0.241635		0.27607	0.978314		0.261667	-0.375053		0.697243	0.396119		0.302223	0.621833		0.32199	0.441401		0.447369	0.701947		0.227427	0.535743
0.377974	0.696453		0.545289	0.409972		0.473741	0.241322		0.20274	-0.130378		0.516669	0.759005		0.422819	0.742314		0.670012	0.00661785		0.193979	0.837747		0.239336	0.821389		0.266345	0.537693		0.299898	0.912936		0.457828	0.504161		0.707825	0.638784		0.253075	-0.234628		0.435327	0.944557		0.0977672	0.460981		0.426252	0.962301
0.579454	0.626349		0.319897	-0.620931		0.672368	0.802786		0.211895	-0.399161		0.78609	0.680494		0.360921	-0.723708		0.484082	-0.266373		0.244465	0.336761		0.252239	0.182282		0.341189	0.29159		0.512089	0.85496		0.473241	0.891626		0.867201	0.0523858		0.270919	0.800261		0.930451	0.693949		0.241072	0.655185		0.323627	0.623443
0.194242	0.663526		0.36626	0.638898		0.345077	-0.177736		0.452245	0.206941		0.641109	0.531014		0.501165	0.950845		0.343715	0.0983237		0.182198	0.554635		0.174151	0.838356		0.406453	0.232669		0.367194	0.108668		0.381644	0.948407		0.506538	-0.0241888		0.677637	-0.16462		0.338398	0.951882		0.03435	0.609501		0.384433	0.127278
0.122247	0.891687		0.538644	0.839179		0.522497	0.728922		0.102306	-0.391397		0.696564	0.773085		0.294962	0.804305		0.425498	0.313447		0.358821	0.502291		0.638989	0.717218		0.491761	0.164343		0.237593	0.889181		0.204438	0.822158		0.620801	0.64354		0.574628	0.747241		0.438251	0.589793		0.718069	0.746821		0.108817	0.902647
0.15198	0.932213		0.155092	-0.402432		0.693963	-0.0483293		0.448383	0.0966695		0.501207	0.787675		0.29127	0.428327		0.494613	0.753192		0.180639	0.499488		0.310365	0.599833		0.337523	0.36368		0.558899	0.722976		0.524639	0.921094		0.838968	0.745749		0.522899	0.763438		0.557902	0.757495		0.196523	-0.520872		0.715948	0.377077
0.301575	0.736383		0.423756	0.855758		0.335601	0.902102		0.287975	-0.550137		0.402796	0.117955		0.175218	0.373018		0.14834	0.624593		0.280191	0.854654		0.40072	0.514305		0.283387	0.125866		0.547317	0.931411		0.54525	0.88966		0.593598	0.529485		0.82284	0.76534		0.696898	0.508396		0.173927	-0.108494		0.0193223	0.133516
0.328695	0.665574		0.391519	0.778584		0.667973	0.735877		0.159063	0.31699		0.530195	-0.623024		0.485003	0.384653		0.434158	0.12316		0.491305	0.840294		0.460686	0.773753		0.511947	0.387213		0.529671	0.325197		0.210747	0.341033		0.635258	0.644819		0.428089	0.699432		0.277835	0.752903		0.465193	0.695825		0.494969	0.840147
0.119113	-0.280709		0.366874	0.443065		0.467605	0.863032		0.346611	-0.744628		0.0462771	0.419628		0.201627	0.0935355		0.466651	0.73574		0.0327815	0.644624		0.224929	0.612757		0.140756	0.742585		0.28163	0.938526		0.397332	0.883895		0.49494	-0.102384		0.660241	0.8735		0.732214	0.751306		0.546463	0.0525929		0.038312	0.923382
0.235157	0.329634		0.339206	0.898723		0.328133	0.814096		0.168582	0.752302		0.387583	-0.633712		0.154861	0.789206		0.216324	0.32241		0.172374	0.734725		0.71509	0.486406		0.663205	0.615211		0.335502	0.907503		0.354275	0.690994		0.712079	0.0787979		0.245219	0.660456		0.603878	0.793735		0.540609	0.72379		0.156633	0.145958
0.352276	0.780734		0.347191	0.846055		0.487992	0.550505		0.306734	-0.413183		0.300018	0.445942		0.25774	0.653234		0.167912	0.848127		0.189438	0.130775		0.219117	0.698364		0.23346	-0.0173576		0.2371	-0.958607		0.473604	0.911525		0.515505	0.576859		0.749292	0.619993		0.487065	0.857928		0.605898	0.856878		0.101017	0.915331
0.327391	0.636232		0.472604	0.939222		0.4862	0.790798		0.296382	0.839953		0.631867	0.772917		0.379277	0.865738		0.178526	0.843687		0.190071	0.436303		0.613004	0.466395		0.173319	-0.0839172		0.228061	-0.048352		0.292767	0.672557		0.278699	-0.0579617		0.487822	0.302319		0.486138	0.860488		0.567177	-0.17592		0.809825	0.763222
0.099758	0.713161		0.280766	-0.902474		0.290235	0.732077		0.367963	0.90827		0.491587	0.725984		0.446923	0.726033		0.102664	-0.0884764		0.297681	0.827733		0.0787683	-0.242602		0.536932	0.353629		0.119993	0.973101		0.392573	0.928864		0.908523	-0.299066		0.491759	0.674499		0.641276	0.639936		0.540957	0.547782		0.6191	0.51541
0.0878541	-0.222957		0.323079	0.849503		0.107416	0.841332		0.191283	-0.686154		0.692258	0.451402		0.24293	0.677394		0.662503	0.353213		0.34062	0.0955669		0.501313	0.887081		0.181522	0.534473		0.297899	0.924452		0.585164	0.442139		0.396777	-0.379414		0.497222	-0.620073		0.771116	0.716159		0.541658	0.763215		0.412506	0.777384
0.0619216	0.720181		0.119619	-0.707094		0.256096	0.769913		0.294958	0.861824		0.248778	0.440105		0.189902	-0.707875		0.341497	0.240587		0.268393	0.791797		0.567655	0.398387		0.151	0.315946		0.207433	0.877376		0.765843	0.00177856		0.276106	-0.49859		0.692927	0.768109		0.484902	-0.239944		0.323865	0.633459		0.730382	0.91522
0.161463	0.582475		0.531284	0.566696		0.114306	0.750181		0.0932122	-0.819043		0.539972	0.824791		0.521823	0.965843		0.320044	0.837603		0.374856	-0.517374		0.578189	0.610517		0.177224	-0.0495421		0.196343	0.947873		0.458966	0.630897		0.818841	-0.178458		0.20684	0.40695		0.371422	0.900063		0.485864	0.49862		0.186364	0.410464
0.368763	0.439938		0.190023	0.93227		0.294966	0.777053		0.256643	-0.46668		0.565714	0.824222		0.332698	0.76708		0.538284	0.683064		0.500864	0.747896		0.43834	0.709936		0.49223	0.270602		0.195853	0.954383		0.140598	0.794673		0.469807	-0.622578		0.433686	0.0429558		0.498443	0.858227		0.517278	0.210178		0.191597	-0.331627
0.135772	0.311758		0.226682	0.821949		0.218256	0.785593		0.126713	0.446215		0.27204	0.757835		0.54004	0.863708		0.0556917	0.660526		0.30478	0.743995		0.718511	-0.304966		0.0670777	0.492167		0.293164	-0.615928		0.451103	0.908588		0.440286	0.408713		0.476553	-0.773775		0.691082	0.937899		0.55964	0.790985		0.262747	0.727341
0.261384	0.587193		0.345026	0.67072		0.35085	0.847258		0.13663	0.235522		0.592929	0.556136		0.470024	0.933953		0.30163	0.75453		0.55843	0.821041		0.191894	0.815898		0.576135	0.614539		0.261091	0.900739		0.297252	0.715587		0.46858	0.394146		0.553519	0.506867		0.679839	0.838678		0.588811	0.740401		0.596071	-0.160541
0.222058	0.553997		0.651029	0.147804		0.210859	0.842212		0.208233	-0.39776		0.561134	-0.50454		0.296986	0.728329		0.576377	0.824251		0.163717	0.815807		0.350262	0.750793		0.288618	0.0613328		0.10164	0.923668		0.12211	0.876385		0.37357	0.114603		0.604226	-0.593284		0.473235	0.679189		0.365136	0.577798		0.330416	0.578802
0.0976853	0.0887219		0.112701	-0.670818		0.206915	0.617085		0.414392	0.117408		0.438025	0.152355		0.260371	0.81309		0.59741	0.566911		0.614	0.73566		0.422511	0.695967		0.533138	0.330101		0.17838	-0.617282		0.454117	0.850719		0.566089	0.510063		0.427526	0.464116		0.477782	0.855364		0.795256	0.580991		0.294601	0.66192
0.0729583	0.394283		0.739797	0.866577		0.306678	0.896379		0.220187	-0.631708		0.307664	0.592435		0.212955	-0.469594		0.425611	0.0945535		0.213518	0.908569		0.496869	0.24448		0.29538	0.565494		0.219137	0.965485		0.377723	0.777774		0.166465	-0.877046		0.154303	-0.110662		0.500542	0.773544		0.692149	0.497066		0.501984	0.694025
0.135308	-0.415184		0.255323	-0.375968		0.420269	0.866899		0.2226	-0.0712037		0.561258	-0.616479		0.148685	0.459969		0.560697	0.800059		0.237533	-0.0335356		0.0965823	0.163657		0.163582	0.342346		0.541863	-0.308494		0.141615	0.746733		0.565719	-0.407892		0.306554	0.609531		0.179524	0.942026		0.511267	-0.258275		0.754391	-0.674855
			0.0730945	0.238393		0.17941	0.305822		0.423315	-0.743729		0.458958	0.626466		0.350141	0.7784		0.427529	0.692299		0.35297	0.613217		0.269239	0.155996		0.309637	0.483277		0.449166	0.842143		0.36696	0.834647		0.379428	0.491766		0.286463	0.858406		0.572209	0.899184		0.771499	0.832319		0.272118	0.69634
			0.166657	-0.550095		0.239478	0.744329		-0.000417515	-0.254597		0.614109	-0.733177		0.673887	0.832288		0.343479	0.748887		0.413128	0.811892		0.292822	0.421467		0.46739	0.36735		0.317684	0.110433		0.364582	0.714182		0.154929	-0.550255		0.575854	-0.219489		0.555354	0.932968		0.395654	0.821088		0.31889	0.791185
			0.0286966	0.591994		0.231682	0.743242		0.10996	-0.640508		0.408771	0.737475		0.348211	0.315327		0.13179	0.300436		0.0320005	0.833723		0.1104	0.446277					0.758577	-0.380794		0.33569	0.734339		0.323101	-0.053386		0.36784	-0.577083		0.832922	0.826246		0.60656	0.67671		0.499878	-0.609176
			0.198274	0.912542		0.420213	0.866163		0.490077	-0.533398		0.597319	0.732737		0.0779624	0.488613		0.480556	0.25925		0.539203	0.467771		0.190127	0.550507					0.186997	-0.851127		0.485436	0.908361		0.372545	-0.17477		0.43831	0.350052		0.276326	-0.0863185		0.513139	0.792105		0.343112	0.39566
			0.156729	0.380932		0.369207	0.0493274					0.502705	-0.646746		0.141295	0.6806		0.303006	0.251395		0.266558	-0.621291		0.384127	0.655562					0.333205	-0.814772		0.3498	0.762554		0.280629	0.0448166		0.625193	-0.621908		0.133682	0.784765		0.536884	0.766734		0.477667	0.923854
			0.415252	0.244796		0.422254	0.65081					0.484265	0.420906		0.212719	0.730357		0.354906	0.757249		0.319021	0.892099		0.353666	-0.110297					0.412466	0.747111		0.0621899	0.957193		0.297491	0.153818		0.158977	0.599811		0.554777	0.89594		0.0791117	-0.128173		0.411367	0.24761
			0.220683	0.687733		0.331345	0.818015					0.341757	0.538549		0.361406	-0.74452					0.299958	0.723659		0.243872	0.245765					0.29335	0.923596		0.191195	0.879838		0.479029	0.236859		0.181814	0.620421		0.462436	0.869247		0.239497	-0.0657731		0.0448239	0.570101
			0.0927826	0.538512								0.364258	0.691645		0.634573	0.414575					0.515994	0.686457		0.182708	0.641561					0.487979	0.238291		0.534139	0.833656		0.305018	0.452041		0.234229	0.345114		0.216191	0.910851		0.317762	-0.0352402		0.595476	0.387381
			0.313192	0.886869								0.228644	0.76963		0.293216	0.672578					0.349377	-0.17887		0.246584	0.763793					0.518351	0.726365		0.543288	0.808659		0.2891	-0.079108		0.251627	0.448124		0.751883	0.854183		0.283293	0.76174		0.604052	0.876205
			0.149081	0.646545								0.89185	0.749475		0.208251	0.175946					0.29476	-0.446572		0.369598	0.702657					0.558766	-0.280554		0.180553	0.596533		0.248038	-0.262589		0.145039	0.119106		0.432864	0.913184		0.496947	0.611057		0.370979	0.141746
			0.172761	-0.793194								0.778961	-0.409366		0.666825	0.45302					0.344618	0.382826		0.208883	0.136112					0.0480343	-0.280065		0.325214	0.857179		0.331021	-0.203206		0.349537	0.42588		0.783756	0.915054		0.212755	0.220349		0.24456	0.499985
			0.120536	0.362669								0.723496	0.59201		0.245328	0.586505					0.288164	0.74126		0.235782	0.644504					0.202635	0.860742		0.0987994	0.688563		0.329363	0.341666		0.389494	0.174239		0.72435	0.958087		0.479438	0.311381		0.457877	0.847072
			0.347613	0.8004								0.292909	0.825249		0.219356	0.848478					0.0734101	0.282786		0.500888	-0.166416					0.163115	-0.0594104		0.07307	0.0364755		0.308383	-0.0635006		0.208582	0.38771		0.551212	0.212613		0.177639	0.541154		0.458665	0.467359
			0.000337169	0.466028								0.344607	0.801663		0.175546	0.367932					0.0403191	0.111058		0.253032	0.647401								0.0935634	0.220451		0.265251	0.419146		0.692991	0.524553		0.445548	0.550338		0.246581	0.737683		0.54737	0.695877
			0.30443	0.239572								0.154856	-0.374143		0.0169522	0.654563					0.1085	0.916921		0.209064	0.968519								0.292812	0.576568		0.349332	0.206659		0.275965	0.473854		0.607734	0.708848		0.123926	0.551124		0.584805	-0.22751
			0.311863	-0.707155								0.323885	0.839293		0.332542	0.812324					0.472354	0.6011		0.307017	0.825205								0.220115	0.833268		0.420534	-0.57044		0.40225	0.285263		0.472616	0.853858		0.209252	0.38309		0.216227	0.59957
			0.180156	0.763895								0.566727	-0.696626		0.455158	0.82724					0.128069	0.53606		0.145491	0.485632								0.404254	0.099242		0.504881	0.637804		0.599961	-0.161157		0.775206	0.84		0.260552	0.541589		0.612289	-0.141317
			0.0968532	-0.711222								0.351858	-0.714564		0.320301	0.743777					0.440206	0.860507		0.175075	0.0914134								0.452806	0.778904		0.962122	0.663524		0.206495	-0.0697257		0.22594	0.786464		0.216549	0.804325		0.154368	0.634804
												0.344782	0.695332		0.228997	-0.523135					0.157986	0.851562		0.608902	0.131187								0.665141	-0.402722		0.141007	0.527842		0.494897	0.478548		0.381562	-0.974284		0.595875	-0.12212		0.312206	0.123399
												0.740603	0.191308		0.368558	0.449763					0.107962	0.560125		0.514831	0.528789								0.346364	0.447862		0.215184	0.468194		0.1035	0.622475		0.695441	0.962689		0.48841	0.801077		0.465204	0.582151
												0.35163	0.837068		0.149773	0.958231					0.125953	0.443822		0.160388	0.170585								0.262542	-0.890316		0.784792	0.385818		0.584232	-0.763345		0.539426	-0.259326		0.519273	0.836513		0.320292	0.882275
												0.5189	-0.658763		0.145785	0.395479					0.0320573	0.89549		0.290907	0.466213								0.125446	0.240863		0.361127	-0.414236		0.184295	0.834322		0.515859	0.950439		0.52271	0.224712		0.269911	-0.632328
												0.807113	0.54998		0.138133	0.670596					0.269949	0.871616		0.0604556	0.593809								0.323412	0.807771		0.155151	0.0793218		0.680826	0.469874		0.6809	0.954995		0.211213	0.692226		0.164324	0.315569
												0.485486	0.628201		0.460215	0.802138					0.27156	0.87561		0.491952	0.695154								0.188273	0.502788		0.611262	0.704128		0.288045	0.385114		0.563254	0.668799		0.172112	0.482771		0.297291	0.118419
												0.902877	0.517093		0.0874038	0.440746					0.136302	0.848626		0.176947	0.759105								0.153938	-0.798303		0.284394	0.441943		0.227916	0.772542		0.565822	0.898894		0.263165	0.0170464		0.186491	-0.670506
												0.0208599	0.765052		0.212362	-0.045626					0.0884792	-0.13908		0.157279	0.452137								0.251937	0.553186		0.236602	-0.257421		0.294761	0.772036		0.552057	0.895949		0.17167	0.582182		0.426302	0.777968
												0.710955	-0.154051		0.347718	0.323407					0.0549966	0.629289		0.323703	0.649377								0.275103	0.766492		0.584064	0.0921312		0.192479	0.532045		0.44028	0.187773		0.210621	-0.489444		0.449074	0.554849
												0.211379	0.234127		0.14387	-0.176617					0.107678	0.761218		0.104852	0.230509											0.636271	0.596806		0.638028	-0.412516		0.377767	0.911424		0.139066	-0.0954042		0.36304	0.535575
												0.0187701	0.494915		0.137795	0.077968					0.315663	0.863183		0.264994	0.456011											0.231417	-0.282757		0.522816	0.475723		0.214147	0.34369					0.39356	-0.055537
												0.867995	0.681566		0.248816	0.437572					0.189417	0.689646		0.113524	0.538643											0.347522	-0.619507		0.601096	0.788587		0.142448	0.334877					0.383314	0.805927
												0.168142	0.28191								0.679558	0.529761		0.345512	0.328188											0.312635	0.19327		0.20929	0.560837								0.335136	0.786836
												0.238742	0.248853								0.0854573	0.531877		0.159278	0.766575											0.358265	0.334523		0.679735	0.286821								0.465917	0.413319
												0.785908	0.142425								0.173576	0.841896		0.183493	0.501223											0.303617	0.294836		0.145479	0.305047								0.485967	-0.133808
												0.544358	0.0345887								0.0852659	0.176329		0.353738	0.549496											0.339798	0.00218799		0.284631	0.689634								0.676103	0.629875
												0.532569	0.686357								0.0629741	0.767659		0.019358	0.48517											0.202791	0.21053		0.113376	0.617959								0.652203	0.298687
												0.150316	0.747909								0.0152872	0.734902														0.428214	0.125591		0.368683	0.249783								0.63732	0.352455
												0.35755	0.849391								0.0701657	0.166768														0.507623	0.0554334		0.273606	0.675602								0.771156	-0.745446
												0.21724	0.176204								0.202767	0.791425														0.103862	0.00514381		0.463368	0.185456								0.257007	0.631142
												-0.00548725	-0.8021								0.130289	0.618248														0.188434	-0.571605		0.185522	0.250648								0.521496	0.782813
												0.678682	0.799614								0.193725	0.566854														0.692579	0.37777											0.218223	0.714548
												0.878564	0.425617																							0.257893	0.159477											0.510484	0.305243
												0.925703	-0.719801																							0.397549	-0.687145											0.348632	0.809424
												0.0401847	0.455363																							0.205947	0.184314											0.0360874	0.662235
												0.170036	-0.245093																																			0.72878	0.295591
												0.353618	0.809925																																			0.263761	0.678232
												0.191326	0.601727																																			0.18023	0.805054
												0.554758	-0.310449																																			0.325518	0.831923
																																																0.190559	0.531304
