# Supplementary material for: Contribution of behavioural variability to representational drift
Source: eLife journal article supplement (doi:10.7554/elife.77907), 2022-08-30
Supplement: supp [file elife-77907-supp-v1.zip › elife_poa_e77907_Figure_4_source_data_1.xls]

## Sheet: functional_connectivity
Session ID:	766640955		Session ID:	767871931		Session ID:	771160300		Session ID:	771990200		Session ID:	774875821		Session ID:	778240327		Session ID:	778998620		Session ID:	779839471		Session ID:	781842082		Session ID:	786091066		Session ID:	787025148		Session ID:	794812542		Session ID:	816200189		Session ID:	829720705		Session ID:	831882777		Session ID:	835479236		Session ID:	839068429
Diff. pupil width	Setpoint similarity		Diff. pupil width	Setpoint similarity		Diff. pupil width	Setpoint similarity		Diff. pupil width	Setpoint similarity		Diff. pupil width	Setpoint similarity		Diff. pupil width	Setpoint similarity		Diff. pupil width	Setpoint similarity		Diff. pupil width	Setpoint similarity		Diff. pupil width	Setpoint similarity		Diff. pupil width	Setpoint similarity		Diff. pupil width	Setpoint similarity		Diff. pupil width	Setpoint similarity		Diff. pupil width	Setpoint similarity		Diff. pupil width	Setpoint similarity		Diff. pupil width	Setpoint similarity		Diff. pupil width	Setpoint similarity		Diff. pupil width	Setpoint similarity
0			0			0			0			0			0			0			0			0			0			0			0			0			0			0			0			0
-0.366049	0.981284		0.0191691	0.980866		-0.583312	0.978709		0.213916	0.971262		1.0763	0.969101		0.517032	0.963187		-0.147772	0.985118		-0.399154	0.960456		-0.116822	0.974082		-0.557722	0.965674		-0.131877	0.988863		1.63953	0.910782		-0.00130831	0.98421		-0.00676437	0.987617		-0.0246677	0.981139		1.00455	0.949841		0.605384	0.971143
-0.685737	0.969378		-0.334581	0.969243		-1.52848	0.903357		-0.0406823	0.951432		0.0576899	0.971233		0.333132	0.927189		-0.320526	0.969244		-0.867076	0.926619		-0.462299	0.959694		-0.332795	0.957222		0.023856	0.989189		0.143188	0.967936		0.201889	0.978212		0.315895	0.902909		-0.122851	0.97658		0.926283	0.942065		0.465714	0.974344
-0.78194	0.967337		-0.327386	0.969024		-0.755245	0.973909		0.0306335	0.9624		-0.103965	0.972614		-0.672076	0.873781		-0.313413	0.962901		-0.873078	0.930108		-0.936356	0.938676		-0.701824	0.953591		-0.12605	0.987978		1.54081	0.890355		0.0916838	0.969887		0.0508554	0.901859		0.00584322	0.970976		0.637201	0.941482		-0.377445	0.957233
-0.629866	0.963489		-0.63941	0.940978		-0.948429	0.968882		-0.491423	0.90996		-0.232484	0.965553		0.2845	0.934876		-0.225039	0.977388		-0.972329	0.936694		-1.21011	0.942651		-0.998615	0.958954		-0.297518	0.981473		0.598024	0.932284		0.171241	0.974341		-0.251882	0.971142		0.105405	0.974883		-0.710467	0.896492		-1.65974	0.927262
-0.673121	0.961734		-0.538594	0.95734		-0.653175	0.969338		-1.35064	0.817127		0.795441	0.960159		-0.355544	0.885663		-0.753117	0.891281		-1.1262	0.958963		-1.08314	0.944191		-0.907948	0.952937		-0.0698491	0.987657		-0.269903	0.964945		0.443442	0.976796		-0.214141	0.966461		-0.133475	0.976267		-1.50446	0.897278		0.368423	0.97885
-0.47291	0.959423		-0.0546778	0.967181		-1.4359	0.937285		-1.65091	0.802402		0.0976951	0.967635		0.295588	0.916351		-0.243213	0.963486		-0.673817	0.961646		-1.30898	0.918301		-0.692067	0.953506		-0.471068	0.9662		-0.209669	0.975346		1.12659	0.944021		-0.119728	0.973657		-0.164432	0.972432		-1.6808	0.882911		0.302429	0.974043
-0.704962	0.948148		0.00329112	0.977802		-0.670618	0.969543		-1.69794	0.809904		-0.636934	0.968504		0.165772	0.918863		0.435909	0.971885		0.906478	0.932264		-1.41466	0.934299		-0.796261	0.947922		-0.751034	0.945165		-0.355934	0.983087		1.69259	0.929294		-0.1016	0.961274		-0.0896502	0.970521		-1.25936	0.902145		0.354272	0.958602
-0.872321	0.943918		-0.445368	0.948887		-1.88164	0.887034		-1.74098	0.795189		-0.627677	0.954085		-0.209777	0.882487		0.313237	0.971863		-0.739792	0.889271		-1.91416	0.895617		-0.770369	0.9459		-0.092075	0.967746		-0.598967	0.962806		1.49751	0.926235		-0.00251735	0.944425		0.275623	0.964578		-1.50238	0.877797		-0.407808	0.959468
-0.702568	0.944557		-0.719072	0.909359		-0.214114	0.967909		-1.78336	0.797293		1.39515	0.950334		-0.0222734	0.939765		-0.124623	0.978487		-0.872577	0.854349		-1.34352	0.939356		-0.653601	0.947934		-0.200278	0.978572		0.0797056	0.978862		-0.0226746	0.960446		0.0506139	0.926828		-0.26946	0.965691		-1.75543	0.87499		-1.05685	0.940256
-0.922068	0.929288		-0.359976	0.927435		-1.26517	0.925758		-1.50413	0.831982		-0.0577131	0.956168		-0.240595	0.954238		-0.00984643	0.980595		-0.962689	0.838435		-1.53141	0.935309		-0.776218	0.939908		-0.571675	0.945087		-0.492413	0.969541		-0.0365405	0.969604		-0.346022	0.957457		-0.116137	0.96763		-1.55692	0.872434		-1.96541	0.912753
-0.914762	0.936515		0.324666	0.889278		-2.09978	0.819767		-1.76818	0.803369		0.829818	0.956499		-0.436807	0.968773		-0.421766	0.952362		-1.19658	0.80551		-1.89121	0.911008		-0.972547	0.935402		-0.596393	0.960028		-0.742287	0.959576		0.021783	0.963851		-0.193817	0.952963		-0.35879	0.965976		-1.7881	0.871288		-2.169	0.906714
-0.574742	0.942932		-0.196203	0.872691		-0.976059	0.957022		-1.69782	0.822024		0.420725	0.960746		0.0279534	0.970924		-0.512777	0.925709		-1.21533	0.816271		-1.76327	0.918307		-1.24172	0.929368		0.209208	0.956824		-0.486508	0.971306		-0.318116	0.938555		-0.146678	0.960975		-0.173971	0.962966		-1.70961	0.894284		-1.48682	0.90311
-0.780484	0.932079		0.112297	0.895803		-0.485738	0.969699		-1.18316	0.864395		1.09931	0.953635		-0.189365	0.969514		-0.205082	0.971487		-1.01927	0.823236		-2.28452	0.881107		-1.31962	0.929495		-0.157396	0.970178		-1.39529	0.922099		0.174982	0.964522		-0.203606	0.949193		0.0205445	0.958783		0.881733	0.909731		-2.18551	0.89092
-0.759537	0.931076		-0.478292	0.869431		-0.692392	0.965617		-1.56446	0.824322		0.0772976	0.953588		-0.30086	0.965561		-0.744395	0.85776		-0.828529	0.83123		-1.0946	0.93882		-1.03771	0.925546		-0.319939	0.968683		-0.514408	0.967036		0.0819924	0.963451		-0.157852	0.94593		-0.044425	0.958794		0.471515	0.906078		-0.976844	0.932989
-0.904778	0.926965		-0.247474	0.869715		-0.962531	0.94972		-1.59929	0.795378		-0.642466	0.94455		-0.344799	0.945558		-0.45468	0.942172		-0.987549	0.821323		-1.63843	0.915829		-1.47846	0.933219		-0.487363	0.95247		-0.952698	0.955443		0.320628	0.952511		-0.271368	0.920641		-0.0164584	0.956657		0.287549	0.908112		-1.20929	0.927601
-0.651252	0.933222		-0.960535	0.820663		-1.60968	0.909535		-1.70004	0.789733		-0.260178	0.962017		0.029615	0.923397		-0.490678	0.934664		-0.916648	0.812248		-1.55481	0.927563		-1.42335	0.932791		-0.00405482	0.971699		-0.75826	0.9615		0.342864	0.953351		0.103847	0.856482		0.1741	0.957411		-1.20892	0.843187		-1.46042	0.936914
-0.7187	0.931262		0.612811	0.87015		-2.37324	0.803761		-1.67244	0.831625		-0.177668	0.959201		-0.102752	0.889424		0.302538	0.959239		-0.0614863	0.823286		-1.51901	0.919365		-1.19212	0.920932		-0.190082	0.966931		1.18485	0.914097		0.436987	0.953599		-0.0810302	0.950981		-0.0389059	0.953732		-1.12311	0.89906		-0.46133	0.961835
-0.786835	0.934034		-0.107112	0.882053		-1.58625	0.922412		-0.600814	0.887965		-0.220103	0.951534		-0.662262	0.85882		-0.0441227	0.970161		-0.78616	0.823107		-1.77168	0.918202		-1.16921	0.913395		-0.127431	0.957086		-0.209047	0.967858		1.80897	0.90819		-0.24847	0.957098		0.128135	0.948039		-1.46448	0.851616		-0.359031	0.954052
-0.758873	0.924639		0.320011	0.887337		-0.256605	0.962847		-1.40949	0.816347		-0.729119	0.942257		-0.508502	0.841302		-0.451561	0.941314		-0.553678	0.860536		-1.74559	0.91094		-1.03571	0.921081		-0.655224	0.910981		-0.244716	0.971987		0.239316	0.93692		0.148046	0.945227		0.380319	0.952224		-0.556823	0.896953		-0.566724	0.949315
-0.921841	0.930622		0.56889	0.841558		-1.39448	0.918061		-1.33585	0.842928		-0.747429	0.944664		-0.455617	0.842628		-0.245474	0.966021		-0.366172	0.886192		-1.87625	0.901839		-0.533959	0.926597		0.0822325	0.959647		-0.570478	0.954254		-0.175712	0.949942			0.950288		0.15049	0.952881		-1.76186	0.83083		-0.386974	0.943174
-0.913218	0.931109		0.0485726	0.857705		-1.37797	0.936041		-1.67048	0.790295		-0.449602	0.949461		-0.887277	0.814047		-0.575323	0.918421		0.240398	0.913185		-1.20887	0.903633		-0.828477	0.919102		-0.103658	0.961421		-0.893037	0.938375		-0.259709	0.954186		-0.349016	0.955812		-0.0012802	0.946272		-1.83096	0.850358		-0.261227	0.93794
-1.13304	0.933394		-0.382287	0.86107		-0.824436	0.960862		-1.59445	0.801091		-0.73678	0.940861		0.0776594	0.813979		-0.529432	0.896683		-0.628252	0.903796		-1.59639	0.892929		-1.2471	0.908794		0.0391049	0.956537		-1.55993	0.888305		0.075441	0.945259		0.142151	0.955804		0.23345	0.942566		-1.97063	0.832762		-0.230451	0.942671
-1.10234	0.926626		-0.391163	0.873568		-1.23933	0.936999		-1.42299	0.830393		0.342805	0.953448		0.31646	0.810928		-0.00739317	0.958734		-1.19607	0.832809		-1.49972	0.920975		-1.83316	0.897302		-0.581051	0.913987		0.0910211	0.939434		1.07094	0.911468			0.94009		-0.0064196	0.945774		-0.701327	0.899347		-0.361328	0.936342
-0.855072	0.938282		-0.790588	0.871709		-2.36913	0.792905		-1.6491	0.810571		0.269933	0.937628		-0.119332	0.854301		-0.460124	0.926655		-1.16409	0.824758		-2.04918	0.903518		-1.94007	0.885094		-0.0557942	0.952541		1.52068	0.882073		0.569585	0.944868		-0.251552	0.94738		0.194767	0.944509		-1.17791	0.853287		-0.553457	0.932498
-0.811391	0.940273		-0.202836	0.945622		-2.42927	0.787446		-1.78563	0.797491		0.296178	0.943485		-0.315468	0.836186		-1.06913	0.850473		-0.824833	0.825053		-2.08335	0.905281		-1.70768	0.900174		-0.312335	0.947152		-0.177773	0.957726		-0.23115	0.941602		0.272305	0.89877		0.419021	0.951796		-1.96335	0.824947		-0.141565	0.930422
-1.01406	0.925956		1.04664	0.889663		-2.43943	0.789398		-1.74326	0.80059		1.39702	0.930454		-0.369919	0.861688		0.14262	0.947253		-1.26306	0.818151		-2.15474	0.905053		-1.99874	0.885834		-0.24884	0.955654		-0.283237	0.965434		-0.204217	0.942668		-0.68937	0.928618		0.0195075	0.941656		-2.00757	0.847768		-0.529483	0.922178
2.1492	0.847902		2.6076	0.827344		-2.35342	0.793165		-1.62291	0.803496		-0.18109	0.940681		-0.124351	0.925647		-0.345425	0.939923		0.592739	0.88953		-1.66589	0.903549		-1.53362	0.875746		-0.0583113	0.953508		-0.283987	0.965166		-0.0349702	0.945897		0.729671	0.940197		0.0431706	0.943452		-0.810133	0.86457		-0.792868	0.919679
1.96683	0.831199		2.30421	0.829941		-2.31235	0.811823		-1.70013	0.794355		0.931258	0.930359		0.376849	0.933846		-0.741542	0.855117		-0.879449	0.924547		-1.66785	0.89838		-1.23536	0.878659		-0.741166	0.917298		-0.523189	0.944629		-0.366975	0.916997		0.11173	0.940208		0.231327	0.939683		-1.86613	0.82882		-0.996805	0.925757
1.00028	0.863233		1.59208	0.843676		-2.36858	0.783149		-1.19342	0.883195		-0.226263	0.933954		-0.135115	0.942109		0.435409	0.930951		-0.794083	0.917056		-1.96074	0.892967		-1.09834	0.875173		0.343886	0.931685		-0.343056	0.966032		0.19285	0.934803		0.525507	0.924812		0.293535	0.941985		-1.78773	0.837069		-0.585179	0.919551
1.55413	0.780477		1.68636	0.718491		0.284625	0.846467		0.484386	0.826315		-0.43828	0.850018		1.58413	0.856624		2.28379	0.682933		-0.159448	0.69859		-0.670989	0.781982		0.211899	0.818374		2.25408	0.731712		-0.306624	0.851856		3.45642	0.700913		2.53541	0.683349		1.14467	0.730719		-0.790133	0.813175		0.249093	0.846912
1.24106	0.774573		2.72404	0.695816		0.519141	0.844968		1.05636	0.835621		-0.33261	0.851295		1.40714	0.869663		2.01747	0.670171		1.90741	0.661736		-2.05547	0.775226		0.401185	0.822153		2.16933	0.730859		-0.696935	0.839108		1.66729	0.72121		2.60968	0.674861		1.15683	0.724562		0.798734	0.813803		0.436748	0.839294
0.372349	0.801339		2.46806	0.693192		-0.0794267	0.831489		0.67377	0.835255		0.936341	0.837093		0.951757	0.867461		1.74812	0.66503		-0.0478938	0.691587		-2.98816	0.72647		0.48949	0.822326		2.09834	0.736096		-1.10945	0.806456		1.34168	0.737191		2.38649	0.69714		1.4305	0.719944		0.467676	0.823915		0.456904	0.837199
0.382202	0.809703		1.52052	0.723119		-1.10351	0.745484		-0.102859	0.784638		0.339965	0.84017		0.824094	0.865708		1.56027	0.657306		-0.390888	0.689518		-2.34016	0.778724		0.670503	0.826649		2.07306	0.752042		-0.638345	0.845765		0.759662	0.749849		2.3166	0.688411		1.84719	0.719453		0.457089	0.817672		0.431182	0.812264
0.721587	0.808552		0.355882	0.743506		-1.6668	0.694205		0.0457781	0.803811		0.710626	0.836121		1.0315	0.837957		1.63479	0.65607		0.253261	0.687545		-0.481716	0.82095		0.788065	0.816674		2.10253	0.75947		-0.911126	0.825745		0.84859	0.747386		1.59317	0.712565		1.73526	0.706898		0.327046	0.807098		0.501071	0.833868
0.406265	0.807011		0.332116	0.745696		-1.75572	0.689384		0.0306201	0.786458		-0.69345	0.8396		0.257094	0.794436		1.64336	0.656675		0.953312	0.686858		0.882488	0.82418		0.474581	0.805551		1.59213	0.782191		-1.23602	0.802909		0.518598	0.783205		2.70426	0.709259		1.04019	0.72344		0.0284283	0.818034		0.472776	0.831457
0.353785	0.811441		0.646072	0.745474		-1.86777	0.684597		0.963669	0.8244		-0.206221	0.852752		1.12534	0.865187		1.58065	0.65423		0.86144	0.685589		0.598377	0.813151		0.592113	0.816516		2.08103	0.762929		-0.478758	0.850749		0.721818	0.771153		2.63321	0.693643		0.631564	0.722259		0.0996018	0.806654		0.471121	0.82398
0.286035	0.800876		0.369717	0.748563		-1.73757	0.691464		0.707054	0.808031		0.375517	0.840972		0.471693	0.777818		1.60076	0.658653		1.48655	0.690078		-0.0902141	0.810993		0.813583	0.821527		1.24837	0.78499		-0.88286	0.794117		1.47334	0.751282		1.49125	0.66135		0.940269	0.723953		0.0731571	0.805353		-0.263804	0.823557
1.12673	0.791623		0.44276	0.753687		-1.41042	0.773855		0.439384	0.812101		0.87273	0.827416		0.164778	0.834745		1.59467	0.64899		-0.11069	0.679153		-0.393418	0.799782		0.865854	0.816093		2.0281	0.734979		-1.80724	0.742322		1.47951	0.740426		1.76146	0.695206		1.48218	0.716081		-0.299598	0.810404		-0.118886	0.825394
1.01619	0.781194		0.29985	0.751031		0.531151	0.847175		0.372285	0.808234		-0.310338	0.831028		-0.666735	0.803407		1.63097	0.650618		-0.17776	0.68574		-0.824388	0.807382		0.58017	0.801479		1.14763	0.781576		-0.543965	0.82545		0.463414	0.756727		1.01513	0.687053		1.4062	0.681558		0.118315	0.810164		0.359349	0.808269
0.425415	0.800547		0.309794	0.760031		-0.302552	0.824531		0.369027	0.809859		-0.0745134	0.842295		-0.992818	0.831299		1.60747	0.659571		0.561708	0.679178		-1.07416	0.805707		0.622533	0.809891		1.49565	0.773471		-0.760258	0.811905		0.682119	0.758971		0.813945	0.704571		1.09216	0.687799		0.224664	0.807509		0.661576	0.807429
0.240222	0.808497		1.25114	0.724639		-1.78482	0.684378		0.374361	0.806089		1.60839	0.821497		0.132623	0.852914		1.36016	0.652198		1.21089	0.701253		-0.430449	0.80249		0.396752	0.805059		1.53325	0.770064		-0.875916	0.810069		0.36324	0.748055		0.732929	0.703904		1.37596	0.683226		0.317785	0.804831		1.40167	0.793786
0.406044	0.806835		1.82017	0.702102		-1.43152	0.737477		0.351813	0.803297		-0.186006	0.833824		0.177098	0.842053		1.40033	0.646001		-0.36642	0.689421		-0.510009	0.796992		0.439018	0.798697		1.38457	0.786175		-1.65967	0.730004		0.725481	0.743108		1.51032	0.704857		1.67475	0.685822		0.337371	0.807041		1.3035	0.773573
0.413478	0.800855		0.460734	0.723169		-1.48673	0.720651		0.273796	0.802029		-0.287939	0.842034		-0.574201	0.756043		1.41543	0.641623		-0.49161	0.713597		-0.327623	0.811215		0.123572	0.802936		1.31473	0.780923		-1.59099	0.756612		0.601506	0.734451		2.02099	0.696349		1.57818	0.683618		0.300463	0.806438		0.801125	0.782917
0.508517	0.80502		0.159659	0.740018		-1.62836	0.697379		0.295551	0.801559		0.79406	0.814173		0.0623426	0.802951		1.46459	0.648001		0.866545	0.664608		-0.192975	0.809473		0.161992	0.798178		1.8627	0.759299		-0.502436	0.815489		0.22675	0.732879		1.43386	0.705319		1.65433	0.680898		0.484136	0.79593		0.656785	0.784531
0.558342	0.795027		0.218917	0.74777		-1.67012	0.699327		0.221641	0.796422		1.05026	0.827145		0.0503805	0.785533		1.45085	0.649232		1.21313	0.68028		-0.413679	0.815991		0.209208	0.783241		1.76984	0.777084		0.648	0.786627		0.955853	0.725167		1.66437	0.702209		1.7247	0.6742		0.504023	0.789601		0.0737501	0.784571
0.380829	0.806548		0.357639	0.755182		-1.75982	0.721317		0.314203	0.790416		-0.267764	0.820036		0.322334	0.816973		1.54865	0.652461		-0.494075	0.669144		-0.223039	0.812356		1.55053	0.79372		1.09808	0.793835		0.28189	0.816577		0.7401	0.734904		1.96261	0.666177		1.279	0.667423		0.340964	0.791571		-1.08971	0.771211
0.51939	0.810605		0.305051	0.743977		0.762848	0.855649		0.126386	0.783532		-0.164649	0.828788		-0.436961	0.747416		1.38127	0.648598		0.275274	0.660579		-0.546462	0.808712		1.73569	0.787363		0.775304	0.803115		-0.336463	0.831201		1.0426	0.72215		2.07013	0.67323		0.479998	0.654943		0.321673	0.78713		-0.27482	0.79219
0.903513	0.809127		0.282129	0.745618		0.590891	0.853175		0.119413	0.788274		1.03375	0.807043		0.38184	0.766292		1.35696	0.639232		1.47609	0.66194		-0.420362	0.802233		1.33996	0.798488		1.0969	0.801839		-0.759393	0.824231		1.97592	0.701322		2.08462	0.684439		1.21868	0.668168		0.145087	0.776377		-0.380143	0.779629
1.12425	0.77782		1.33409	0.702664		-0.264052	0.84044		0.0964026	0.788905		1.37617	0.801308		0.42878	0.751576		1.30357	0.657592		0.878444	0.661949		-0.337104	0.80001		0.658639	0.796226		0.975591	0.785113		-0.349435	0.849546		0.602363	0.722257		1.02375	0.658108		1.40395	0.675237		0.172123	0.777818		-0.847748	0.769685
2.33797	0.711243		2.40311	0.657437		-0.650874	0.819363		0.190023	0.787501		0.975963	0.814111		-0.876744	0.662952		1.19435	0.640133		-0.423778	0.673519		-0.0762836	0.804195		0.138896	0.789786		0.787711	0.800735		-0.583347	0.826686		0.289121	0.732825		1.94436	0.68011		1.09286	0.658462		0.180839	0.783991		-0.699638	0.781397
2.03402	0.733988		2.07839	0.640053		-0.919341	0.80913		0.0841515	0.788079		1.34268	0.801795		0.72087	0.79952		1.29175	0.643429		-0.476839	0.680542		-0.157341	0.801372		-0.194081	0.791976		0.635767	0.810692		-1.00266	0.799899		0.388744	0.736991		1.49798	0.670078		0.641585	0.63331		0.215056	0.781224		-0.213055	0.79181
0.654151	0.770198		0.988098	0.695917		-1.62757	0.706177		0.168824	0.792561		0.287824	0.814195		-0.65298	0.650823		1.77115	0.666541		-0.0177052	0.674373		-0.371561	0.795559		-0.123281	0.79075		0.70695	0.799802		-1.82283	0.735738		1.09347	0.727177		1.23256	0.678646		0.0242448	0.638544		0.218822	0.784619		-0.377533	0.799499
0.210084	0.790088		0.385904	0.721887		-1.38069	0.724431		0.0242634	0.782334		0.885858	0.818997		-1.22253	0.665022		2.09627	0.673403		0.600316	0.672648		-0.0412971	0.800546		-0.0846676	0.784083		0.447176	0.79759		-0.6289	0.799195		0.59658	0.744817		1.01306	0.648521		-1.69345	0.529707		0.144344	0.780871		-0.724828	0.793595
0.160832	0.794161		0.25205	0.728273		0.467849	0.845173		0.00804742	0.786762		2.84473	0.762288		-2.58511	0.658349		1.9016	0.671549		-0.276589	0.683486		-0.0239361	0.807581		0.038856	0.788676		0.619367	0.790848		-1.08625	0.778856		0.231147	0.736354		1.11784	0.66942		0.0357139	0.610856		0.0656999	0.781916		-0.2604	0.796756
0.108523	0.797106		0.305524	0.727685		0.74503	0.850333		0.00188867	0.784759		1.38913	0.800221		-1.80909	0.835307		1.50368	0.666343		0.814761	0.666367		-0.36721	0.801812		0.136125	0.783474		1.12393	0.784316		-1.27592	0.720351		0.168904	0.726204		0.870041	0.689034		0.21331	0.665693		0.0304944	0.787457		-0.481078	0.792563
0.219336	0.804441		0.675531	0.724818		-0.569349	0.799169		-0.0131326	0.785031		-0.185445	0.801943		0.821765	0.867181		1.41018	0.64621		1.18846	0.677184		-0.149074	0.809452		0.0552613	0.783889		1.85527	0.774761		-0.708216	0.802036		0.210483	0.72573		0.605276	0.700674		0.399184	0.671615		0.0660143	0.792351		0.133609	0.789808
1.29348	0.779173		0.32681	0.730475		-1.46915	0.709071		0.04547	0.784484		-0.267063	0.809303		0.224134	0.861298		1.53184	0.646889		-0.168934	0.680562		-0.127048	0.801696		0.416565	0.787666		1.95011	0.765114		-1.05746	0.776623		0.634446	0.733559		0.704658	0.677229		0.00868105	0.66085		0.116397	0.783575		-0.174782	0.804282
0.763445	0.783638		1.10914	0.701543		-1.76699	0.682999		0.072838	0.785623		0.0383212	0.817376		-0.253088	0.856194		1.60218	0.648715		-0.618006	0.67728		-0.167786	0.79819		-1.07764	0.7882		1.79472	0.777802		-1.60522	0.753685		2.19761	0.683962		0.530361	0.67275		0.141309	0.654732		0.29605	0.784629		-0.210449	0.800624
0.237054	0.806451		1.00161	0.687913		-1.50887	0.697032		-0.0695349	0.778555		-0.0956076	0.814069		-0.761388	0.805614		1.58816	0.644936		-0.0983698	0.67061		0.00386047	0.802436		-0.96543	0.783813		1.81489	0.768073		-0.498903	0.813303		1.92896	0.70689		0.547958	0.679829		-0.120603	0.680692		0.266006	0.785363		-0.287856	0.80295
0.366049	0.981284		-0.0191691	0.980866		0.583312	0.978709		-0.213916	0.971262		-1.0763	0.969101		-0.517032	0.963187		0.147772	0.985118		0.399154	0.960456		0.116822	0.974082		0.557722	0.965674		0.131877	0.988863		-1.63953	0.910782		0.00130831	0.98421		0.00676437	0.987617		0.0246677	0.981139		-1.00455	0.949841		-0.605384	0.971143
0			0			0			0			0			0			0			0			0			0			0			0			0			0			0			0			0
-0.319688	0.987235		-0.35375	0.968987		-0.94517	0.933865		-0.254598	0.976146		-1.01861	0.960473		-0.1839	0.983668		-0.172755	0.972938		-0.467922	0.984902		-0.345477	0.989372		0.224927	0.990641		0.155733	0.987242		-1.49634	0.938935		0.203198	0.98045		0.322659	0.925112		-0.0981837	0.995136		-0.0782722	0.978585		-0.13967	0.986164
-0.415892	0.981242		-0.346555	0.957222		-0.171933	0.984336		-0.183282	0.971988		-1.18026	0.950331		-1.18911	0.94584		-0.165641	0.969092		-0.473924	0.98414		-0.819534	0.971532		-0.144102	0.984047		0.00582698	0.993302		-0.0987252	0.984713		0.0929921	0.979478		0.0576198	0.92201		0.0305109	0.989542		-0.367354	0.974184		-0.982829	0.918331
-0.263817	0.979386		-0.658579	0.927424		-0.365117	0.979002		-0.705339	0.943102		-1.30878	0.924174		-0.232531	0.982517		-0.0772671	0.979719		-0.573174	0.981319		-1.09329	0.966855		-0.440893	0.980566		-0.165641	0.987946		-1.04151	0.945737		0.172549	0.978426		-0.245117	0.972128		0.130072	0.989435		-1.71502	0.907932		-2.26512	0.876483
-0.307072	0.980545		-0.557763	0.946438		-0.0698629	0.980485		-1.56456	0.857193		-0.280854	0.982414		-0.872575	0.957714		-0.605345	0.895274		-0.72705	0.970984		-0.966313	0.969998		-0.350226	0.978766		0.0620282	0.986288		-1.90944	0.928111		0.444751	0.977834		-0.207377	0.963932		-0.108807	0.988854		-2.50901	0.892004		-0.236961	0.975123
-0.106861	0.978266		-0.0738469	0.978203		-0.852589	0.952518		-1.86482	0.837013		-0.9786	0.951019		-0.221443	0.967725		-0.0954408	0.968238		-0.274663	0.953031		-1.19216	0.94571		-0.134345	0.978223		-0.339191	0.984865		-1.8492	0.911964		1.1279	0.944339		-0.112964	0.975789		-0.139765	0.986325		-2.68535	0.88277		-0.302955	0.974222
-0.338913	0.972406		-0.015878	0.980176		-0.0873059	0.97812		-1.91185	0.83936		-1.71323	0.929297		-0.35126	0.971621		0.583681	0.967781		1.30563	0.894181		-1.29784	0.956549		-0.238539	0.97242		-0.619157	0.972046		-1.99547	0.898722		1.6939	0.933661		-0.0948352	0.960498		-0.0649825	0.983596		-2.26392	0.906743		-0.251112	0.984659
-0.506272	0.965819		-0.464538	0.941194		-1.29833	0.904166		-1.95489	0.824757		-1.70397	0.902528		-0.726809	0.950573		0.461009	0.973847		-0.340637	0.845587		-1.79734	0.932133		-0.212647	0.974961		0.0398023	0.961879		-2.2385	0.878892		1.49882	0.92668		0.00424702	0.959431		0.300291	0.979669		-2.50694	0.893886		-1.01319	0.939536
-0.336519	0.965888		-0.738241	0.893138		0.369199	0.970296		-1.99728	0.826394		0.318858	0.983098		-0.539305	0.976878		0.0231492	0.985117		-0.473423	0.786324		-1.2267	0.961861		-0.0958792	0.971448		-0.068401	0.985942		-1.55983	0.921077		-0.0213663	0.974629		0.0573783	0.946285		-0.244793	0.981728		-2.75999	0.879735		-1.66223	0.892143
-0.556019	0.952741		-0.379145	0.922084		-0.681854	0.950904		-1.71805	0.863116		-1.13401	0.935637		-0.757627	0.972419		0.137925	0.981669		-0.563535	0.765139		-1.41459	0.962642		-0.218495	0.958903		-0.439798	0.96973		-2.13195	0.885642		-0.0352322	0.978266		-0.339258	0.963763		-0.0914689	0.98117		-2.56148	0.889056		-2.57079	0.860549
-0.548713	0.958367		0.305497	0.908288		-1.51647	0.83993		-1.9821	0.838513		-0.246477	0.976424		-0.953839	0.949078		-0.273994	0.957328		-0.797431	0.737116		-1.77439	0.942164		-0.414825	0.953025		-0.464516	0.976845		-2.38182	0.853941		0.0230913	0.973155		-0.187052	0.955429		-0.334123	0.982114		-2.79265	0.878723		-2.77438	0.850847
-0.208693	0.963019		-0.215372	0.881671		-0.392747	0.958167		-1.91173	0.85318		-0.65557	0.962389		-0.489078	0.939579		-0.365005	0.931329		-0.816176	0.736175		-1.64645	0.945023		-0.683997	0.95107		0.341086	0.942663		-2.12604	0.885346		-0.316808	0.955886		-0.139913	0.964544		-0.149303	0.97823		-2.71417	0.900163		-2.0922	0.847191
-0.414435	0.954145		0.0931283	0.907839		0.0975739	0.973085		-1.39708	0.888895		0.0230108	0.976496		-0.706397	0.945528		-0.05731	0.971398		-0.620112	0.738228		-2.1677	0.91405		-0.761895	0.948188		-0.0255186	0.979338		-3.03482	0.837325		0.17629	0.964623		-0.196841	0.949494		0.0452123	0.97663		-0.122822	0.960941		-2.79089	0.836553
-0.393488	0.955245		-0.497462	0.864494		-0.10908	0.978123		-1.77837	0.858521		-0.998997	0.94205		-0.817892	0.963409		-0.596623	0.864354		-0.429374	0.742826		-0.977783	0.958835		-0.479986	0.949301		-0.188062	0.979149		-2.15394	0.878646		0.0833007	0.969564		-0.151087	0.950296		-0.0197572	0.974634		-0.53304	0.961594		-1.58223	0.871992
-0.538729	0.950805		-0.266643	0.866627		-0.379219	0.969371		-1.81321	0.834114		-1.71876	0.903766		-0.861831	0.971838		-0.306908	0.946023		-0.588395	0.73736		-1.5216	0.947535		-0.920734	0.946809		-0.355486	0.97234		-2.59223	0.875099		0.321936	0.960875		-0.264604	0.922146		0.00820931	0.973245		-0.717005	0.958012		-1.81468	0.874459
-0.285203	0.951982		-0.979704	0.812503		-1.02637	0.929699		-1.91396	0.824103		-1.33647	0.961356		-0.487417	0.964484		-0.342906	0.938114		-0.517493	0.732406		-1.43799	0.953121		-0.865628	0.956063		0.127822	0.968831		-2.39779	0.875713		0.344172	0.958265		0.110611	0.875249		0.198768	0.973558		-2.21348	0.875554		-2.0658	0.890199
-0.352651	0.953429		0.593641	0.883131		-1.78992	0.823484		-1.88636	0.858356		-1.25396	0.942867		-0.619784	0.949591		0.45031	0.961171		0.337668	0.724741		-1.40219	0.947542		-0.6344	0.94726		-0.0582047	0.979273		-0.454688	0.971695		0.438295	0.953344		-0.0742658	0.960429		-0.0142381	0.969403		-2.12767	0.929124		-1.06671	0.937203
-0.420786	0.956886		-0.126281	0.884405		-1.00294	0.925056		-0.81473	0.903917		-1.2964	0.929657		-1.17929	0.927888		0.103649	0.973315		-0.387006	0.742935		-1.65486	0.947277		-0.611484	0.944725		0.00444596	0.972295		-1.84858	0.92244		1.81028	0.900963		-0.241706	0.959722		0.152803	0.966568		-2.46904	0.87279		-0.964415	0.936074
-0.392824	0.948015		0.300841	0.905925		0.326708	0.964268		-1.62341	0.850014		-1.80541	0.898973		-1.02553	0.906841		-0.303789	0.945642		-0.154524	0.786528		-1.62877	0.944273		-0.477986	0.947471		-0.523347	0.942046		-1.88425	0.910644		0.240624	0.944784		0.15481	0.956124		0.404987	0.966835		-1.56138	0.923593		-1.17211	0.927945
-0.555792	0.951281		0.549721	0.86562		-0.811168	0.942936		-1.54977	0.873203		-1.82372	0.901865		-0.972649	0.905561		-0.0977019	0.966345		0.0329821	0.83075		-1.75943	0.937886		0.0237633	0.945134		0.21411	0.957584		-2.21001	0.884545		-0.174404	0.963685			0.951833		0.175157	0.967026		-2.76642	0.848541		-0.992358	0.941108
-0.547169	0.949273		0.0294035	0.872059		-0.794656	0.95357		-1.8844	0.823354		-1.5259	0.910151		-1.40431	0.876019		-0.427551	0.923599		0.639552	0.863197		-1.09205	0.930562		-0.270755	0.936381		0.0282198	0.969991		-2.53257	0.852379		-0.258401	0.966166		-0.342252	0.956129		0.0233875	0.964054		-2.83551	0.867286		-0.866611	0.941161
-0.766988	0.951654		-0.401456	0.863087		-0.241124	0.966706		-1.80836	0.831506		-1.81308	0.895536		-0.439372	0.885891		-0.38166	0.902399		-0.229097	0.857178		-1.47957	0.92904		-0.689381	0.917491		0.170982	0.956918		-3.19946	0.811614		0.0767493	0.952337		0.148915	0.958759		0.258117	0.959965		-2.97518	0.847156		-0.835835	0.935834
-0.73629	0.948377		-0.410332	0.877886		-0.656022	0.954483		-1.6369	0.860013		-0.73349	0.965909		-0.200571	0.884132		0.140379	0.964143		-0.79692	0.778581		-1.3829	0.942175		-1.27544	0.925138		-0.449174	0.943091		-1.54851	0.939405		1.07225	0.913641			0.93865		0.0182481	0.962279		-1.70588	0.923175		-0.966712	0.93737
-0.489023	0.954128		-0.809757	0.874556		-1.78582	0.812635		-1.86302	0.839891		-0.806362	0.94146		-0.636363	0.91278		-0.312352	0.935347		-0.764933	0.752635		-1.93235	0.938398		-1.38235	0.91547		0.0760831	0.960123		-0.118848	0.963296		0.570893	0.951573		-0.244788	0.95243		0.219435	0.959514		-2.18246	0.887904		-1.15884	0.913357
-0.445342	0.95366		-0.222005	0.960634		-1.84596	0.80386		-1.99954	0.82519		-0.780117	0.962259		-0.8325	0.903562		-0.921358	0.85821		-0.425678	0.74857		-1.96653	0.937926		-1.14995	0.913932		-0.180458	0.962416		-1.81731	0.928969		-0.229842	0.955979		0.27907	0.918853		0.443689	0.960188		-2.96791	0.835717		-0.746949	0.927964
-0.648008	0.944126		1.02747	0.920486		-1.85612	0.802112		-1.95718	0.827665		0.320726	0.96681		-0.886951	0.906503		0.290392	0.956068		-0.863902	0.760134		-2.03791	0.934075		-1.44102	0.904096		-0.116962	0.968716		-1.92277	0.922875		-0.202909	0.952995		-0.682606	0.928524		0.0441752	0.955134		-3.01212	0.859485		-1.13487	0.918119
2.51525	0.850445		2.58844	0.853487		-1.7701	0.805518		-1.83682	0.834083		-1.25739	0.934027		-0.641383	0.93951		-0.197653	0.945519		0.991893	0.816773		-1.54907	0.933822		-0.975898	0.901419		0.0735661	0.961255		-1.92352	0.901458		-0.0336618	0.95386		0.736436	0.948877		0.0678383	0.956043		-1.81469	0.897658		-1.39825	0.918763
2.33288	0.831679		2.28504	0.8538		-1.72903	0.82192		-1.91405	0.823071		-0.145037	0.961581		-0.140183	0.918674		-0.59377	0.863121		-0.480294	0.907979		-1.55103	0.931075		-0.677635	0.906733		-0.609289	0.943132		-2.16272	0.87491		-0.365667	0.931328		0.118494	0.94987		0.255994	0.953376		-2.87069	0.847172		-1.60219	0.910766
1.36633	0.86195		1.57291	0.87625		-1.78526	0.794194		-1.40733	0.900372		-1.30256	0.93056		-0.652147	0.901034		0.583181	0.931932		-0.394929	0.91042		-1.84392	0.925756		-0.540614	0.90577		0.475764	0.922005		-1.98259	0.880244		0.194158	0.936382		0.532271	0.921097		0.318203	0.953659		-2.79229	0.843358		-1.19056	0.919145
1.92018	0.776285		1.66719	0.737334		0.867937	0.826477		0.27047	0.812208		-1.51458	0.848315		1.0671	0.823121		2.43156	0.676522		0.239707	0.601967		-0.554167	0.775447		0.769621	0.799294		2.38596	0.717402		-1.94616	0.83398		3.45773	0.685702		2.54217	0.701006		1.16934	0.732637		-1.79469	0.810014		-0.356291	0.817421
1.6071	0.777249		2.70487	0.713218		1.10245	0.840269		0.842442	0.830348		-1.4089	0.866748		0.890109	0.835479		2.16524	0.667849		2.30656	0.56586		-1.93865	0.785456		0.958908	0.826677		2.30121	0.720909		-2.33647	0.802238		1.6686	0.706656		2.61645	0.696233		1.1815	0.730653		-0.205821	0.84245		-0.168636	0.84214
0.738398	0.803599		2.44889	0.717867		0.503886	0.839294		0.459854	0.833999		-0.139954	0.879975		0.434725	0.839766		1.89589	0.66345		0.351261	0.614189		-2.87134	0.743312		1.04721	0.822635		2.23022	0.725608		-2.74898	0.742335		1.34299	0.725663		2.39326	0.717462		1.45517	0.724696		-0.536879	0.846358		-0.14848	0.836277
0.748251	0.811939		1.50135	0.749453		-0.520201	0.756963		-0.316775	0.810404		-0.73633	0.870827		0.307062	0.832624		1.70804	0.657446		0.00826666	0.611618		-2.22334	0.780355		1.22823	0.816268		2.20493	0.740026		-2.27788	0.799436		0.76097	0.732919		2.32337	0.711375		1.87186	0.722438		-0.547465	0.840666		-0.174202	0.824503
1.08764	0.806685		0.336713	0.756912		-1.08349	0.697894		-0.168138	0.81474		-0.365669	0.865201		0.51447	0.830088		1.78256	0.655002		0.652415	0.59889		-0.364894	0.812965		1.34579	0.811489		2.23441	0.746449		-2.55066	0.778134		0.849899	0.726967		1.59993	0.727403		1.75993	0.708535		-0.677509	0.836731		-0.104314	0.833696
0.772313	0.806592		0.312947	0.760652		-1.17241	0.691122		-0.183296	0.802363		-1.76975	0.823621		-0.259938	0.799476		1.79113	0.657546		1.35247	0.59298		0.99931	0.821072		1.0323	0.80708		1.72401	0.76626		-2.87555	0.741014		0.519906	0.76925		2.71103	0.728359		1.06486	0.729558		-0.976126	0.842457		-0.132608	0.828656
0.719834	0.814519		0.626903	0.762158		-1.28445	0.685553		0.749753	0.818075		-1.28252	0.872786		0.60831	0.816449		1.72843	0.653599		1.26059	0.598154		0.715199	0.825295		1.14983	0.814288		2.2129	0.745283		-2.11829	0.808819		0.723126	0.756446		2.63998	0.717222		0.656232	0.727506		-0.904953	0.839858		-0.134264	0.828442
0.652084	0.804723		0.350548	0.761669		-1.15425	0.690685		0.493138	0.810971		-0.700778	0.86248		-0.0453384	0.772925		1.74853	0.657279		1.8857	0.594266		0.0266079	0.828524		1.37131	0.812697		1.38024	0.769437		-2.52239	0.738273		1.47465	0.733877		1.49801	0.680355		0.964937	0.731193		-0.931398	0.837888		-0.869188	0.777282
1.49278	0.793897		0.423591	0.765012		-0.827103	0.772063		0.225468	0.814008		-0.203565	0.872772		-0.352253	0.824376		1.74244	0.650108		0.288465	0.595774		-0.276596	0.819425		1.42358	0.80792		2.15998	0.724337		-3.44677	0.693105		1.48082	0.725507		1.76823	0.717857		1.50685	0.720023		-1.30415	0.834422		-0.72427	0.783398
1.38224	0.781452		0.280681	0.761778		1.11446	0.83997		0.158369	0.814325		-1.38663	0.836632		-1.18377	0.800669		1.77875	0.652289		0.221394	0.602098		-0.707566	0.827627		1.13789	0.804339		1.27951	0.766122		-2.1835	0.768533		0.464722	0.746107		1.02189	0.706915		1.43087	0.68627		-0.886239	0.836507		-0.246035	0.787525
0.791464	0.805382		0.290625	0.767903		0.280761	0.832979		0.155111	0.816494		-1.15081	0.859632		-1.50985	0.807853		1.75524	0.659768		0.960862	0.587423		-0.957337	0.828003		1.18026	0.810529		1.62753	0.758324		-2.39979	0.757529		0.683428	0.739872		0.82071	0.722786		1.11683	0.687926		-0.779891	0.842215		0.0561923	0.796264
0.606271	0.814861		1.23197	0.744743		-1.20151	0.693186		0.160445	0.808962		0.532092	0.866696		-0.384409	0.830939		1.50793	0.655234		1.61005	0.603765		-0.313627	0.825989		0.954474	0.792947		1.66512	0.755751		-2.51545	0.764212		0.364548	0.734094		0.739693	0.720287		1.40062	0.690709		-0.68677	0.832312		0.796285	0.756482
0.772093	0.80956		1.801	0.729625		-0.848211	0.745787		0.137898	0.80871		-1.2623	0.842898		-0.339934	0.82158		1.5481	0.647578		0.0327341	0.612141		-0.393187	0.817307		0.99674	0.797651		1.51645	0.770047		-3.29921	0.681435		0.726789	0.727178		1.51708	0.728252		1.69942	0.693116		-0.667183	0.833422		0.698116	0.766171
0.779527	0.802888		0.441564	0.74066		-0.903421	0.731528		0.0598803	0.807819		-1.36423	0.842414		-1.09123	0.777977		1.5632	0.642706		-0.0924557	0.629747		-0.210801	0.826853		0.681294	0.799717		1.4466	0.766973		-3.23052	0.70419		0.602814	0.71825		2.02775	0.716655		1.60284	0.693251		-0.704091	0.837505		0.195741	0.778896
0.874566	0.806752		0.14049	0.753688		-1.04504	0.704951		0.0816356	0.804144		-0.282235	0.865706		-0.454689	0.817453		1.61237	0.649029		1.2657	0.56881		-0.0761528	0.828436		0.719715	0.785229		1.99457	0.751598		-2.14197	0.776244		0.228059	0.719779		1.44063	0.724647		1.679	0.688976		-0.520419	0.832093		0.0514009	0.765954
0.924391	0.796276		0.199747	0.759001		-1.0868	0.701756		0.007725	0.799703		-0.0260344	0.856041		-0.466651	0.812602		1.59862	0.649517		1.61228	0.586649		-0.296857	0.828664		0.76693	0.789688		1.90172	0.767814		-0.991533	0.858633		0.957162	0.702841		1.67114	0.720691		1.74937	0.68218		-0.500532	0.819934		-0.531634	0.77057
0.746878	0.812686		0.33847	0.768758		-1.17651	0.722728		0.100288	0.79577		-1.34406	0.817757		-0.194698	0.82683		1.69642	0.652111		-0.0949203	0.597465		-0.106217	0.826733		2.10825	0.773114		1.22996	0.782641		-1.35764	0.855521		0.741409	0.718263		1.96938	0.696698		1.30366	0.677614		-0.66359	0.823388		-1.69509	0.704345
0.885439	0.813672		0.285882	0.756558		1.34616	0.841744		-0.0875298	0.790033		-1.24094	0.830984		-0.953993	0.789213		1.52905	0.651063		0.674428	0.571553		-0.42964	0.823777		2.29341	0.786927		0.907181	0.790057		-1.976	0.828039		1.04391	0.703596		2.07689	0.700344		0.504665	0.665518		-0.682881	0.824345		-0.880205	0.76109
1.26956	0.810946		0.26296	0.757017		1.1742	0.850408		-0.0945025	0.797312		-0.0425425	0.851645		-0.135191	0.80742		1.50473	0.641413		1.87525	0.568884		-0.30354	0.82097		1.89768	0.791857		1.22878	0.786471		-2.39893	0.78302		1.97723	0.687955		2.09138	0.715081		1.24334	0.681782		-0.859468	0.827357		-0.985527	0.737847
1.4903	0.776007		1.31492	0.724059		0.31926	0.846379		-0.117513	0.798496		0.299871	0.848732		-0.0882519	0.795879		1.45134	0.6594		1.2776	0.576383		-0.220282	0.81737		1.21636	0.779614		1.10747	0.770002		-1.98897	0.830112		0.603671	0.708658		1.03051	0.683516		1.42862	0.687088		-0.832431	0.825846		-1.45313	0.724298
2.70402	0.71042		2.38394	0.678651		-0.0675613	0.825725		-0.0238932	0.794499		-0.100332	0.842592		-1.39378	0.722934		1.34212	0.643831		-0.024624	0.595307		0.0405384	0.817501		0.696618	0.781395		0.919588	0.788389		-2.22288	0.790689		0.290429	0.720594		1.95113	0.70455		1.11753	0.667744		-0.823716	0.82532		-1.30502	0.743144
2.40007	0.731546		2.05922	0.669816		-0.336029	0.812146		-0.129764	0.797466		0.266383	0.848894		0.203839	0.81671		1.43952	0.645573		-0.0776846	0.599142		-0.0405194	0.815303		0.363641	0.789022		0.767644	0.797234		-2.64219	0.75342		0.390053	0.719532		1.50475	0.695413		0.666252	0.645195		-0.789498	0.82773		-0.81844	0.746353
1.0202	0.768309		0.968929	0.722157		-1.04426	0.713175		-0.0450919	0.800939		-0.788471	0.82248		-1.17001	0.718075		1.91893	0.664701		0.381449	0.584345		-0.254739	0.814478		0.434442	0.783164		0.838828	0.78412		-3.46237	0.685886		1.09478	0.710254		1.23932	0.704009		0.0489125	0.64329		-0.785733	0.827579		-0.982918	0.760633
0.576132	0.792183		0.366735	0.740324		-0.79738	0.728852		-0.189652	0.795285		-0.190437	0.853795		-1.73956	0.71973		2.24404	0.671133		0.999471	0.582043		0.0755249	0.815437		0.473055	0.787243		0.579053	0.783669		-2.26843	0.767739		0.597888	0.729858		1.01982	0.672907		-1.66878	0.528156		-0.860211	0.825313		-1.33021	0.753682
0.526881	0.798753		0.232881	0.744723		1.05116	0.831597		-0.205868	0.793413		1.76843	0.827438		-3.10214	0.698103		2.04938	0.670137		0.122565	0.599996		0.0928859	0.823351		0.596578	0.788057		0.751244	0.773808		-2.72579	0.724642		0.232456	0.723187		1.1246	0.694257		0.0603816	0.610251		-0.938855	0.825595		-0.865784	0.773815
0.474571	0.803829		0.286355	0.747483		1.32834	0.850552		-0.212027	0.794193		0.312832	0.834372		-2.32612	0.816225		1.65145	0.665571		1.21392	0.572341		-0.250388	0.819226		0.693847	0.778912		1.25581	0.767008		-2.91546	0.679432		0.170212	0.711817		0.876806	0.711634		0.237978	0.673886		-0.97406	0.829061		-1.08646	0.748373
0.585385	0.81278		0.656362	0.744593		0.0139635	0.813074		-0.227048	0.792624		-1.26174	0.792566		0.304733	0.832241		1.55796	0.650189		1.58761	0.58464		-0.0322523	0.824563		0.612984	0.776918		1.98715	0.765378		-2.34775	0.752971		0.211791	0.709782		0.612041	0.720583		0.423851	0.680676		-0.93854	0.8306		-0.471775	0.766133
1.65953	0.778751		0.30764	0.750062		-0.885838	0.716971		-0.168446	0.791422		-1.34336	0.790735		-0.292898	0.820342		1.67961	0.650089		0.230221	0.595933		-0.0102264	0.816391		0.974287	0.769137		2.08199	0.755369		-2.69699	0.714023		0.635754	0.711971		0.711422	0.69989		0.0333488	0.674212		-0.888157	0.830214		-0.780167	0.776243
1.12949	0.782378		1.08997	0.724512		-1.18368	0.688352		-0.141078	0.794998		-1.03797	0.804649		-0.77012	0.823073		1.74995	0.651191		-0.218851	0.597767		-0.0509638	0.811065		-0.519915	0.774458		1.9266	0.763018		-3.24475	0.715835		2.19892	0.66529		0.537126	0.692399		0.165977	0.662508		-0.708504	0.818837		-0.815833	0.785407
0.603103	0.80964		0.982439	0.715986		-0.925561	0.701854		-0.283451	0.786153		-1.1719	0.798017		-1.27842	0.809992		1.73594	0.646646		0.300785	0.581272		0.120682	0.819933		-0.407707	0.773778		1.94677	0.758696		-2.13844	0.783475		1.93026	0.692178		0.554722	0.699616		-0.095935	0.68851		-0.738548	0.818099		-0.89324	0.77101
0.685737	0.969378		0.334581	0.969243		1.52848	0.903357		0.0406823	0.951432		-0.0576899	0.971233		-0.333132	0.927189		0.320526	0.969244		0.867076	0.926619		0.462299	0.959694		0.332795	0.957222		-0.023856	0.989189		-0.143188	0.967936		-0.201889	0.978212		-0.315895	0.902909		0.122851	0.97658		-0.926283	0.942065		-0.465714	0.974344
0.319688	0.987235		0.35375	0.968987		0.94517	0.933865		0.254598	0.976146		1.01861	0.960473		0.1839	0.983668		0.172755	0.972938		0.467922	0.984902		0.345477	0.989372		-0.224927	0.990641		-0.155733	0.987242		1.49634	0.938935		-0.203198	0.98045		-0.322659	0.925112		0.0981837	0.995136		0.0782722	0.978585		0.13967	0.986164
0			0			0			0			0			0			0			0			0			0			0			0			0			0			0			0			0
-0.0962036	0.990881		0.00719461	0.984974		0.773237	0.939723		0.0713158	0.973153		-0.161654	0.99005		-1.00521	0.960758		0.0071135	0.987447		-0.00600221	0.994312		-0.474057	0.978367		-0.369029	0.991978		-0.149906	0.98881		1.39762	0.919971		-0.110206	0.982354		-0.265039	0.977992		0.128695	0.992804		-0.289082	0.985129		-0.843159	0.94486
0.0558707	0.982671		-0.304829	0.98201		0.580053	0.940985		-0.450741	0.97104		-0.290174	0.980906		-0.0486319	0.989841		0.0954875	0.984747		-0.105253	0.989709		-0.747809	0.972681		-0.66582	0.987823		-0.321374	0.988423		0.454836	0.979676		-0.0306482	0.973604		-0.567776	0.880874		0.228256	0.99099		-1.63675	0.916822		-2.12545	0.902964
0.0126161	0.98304		-0.204013	0.978791		0.875307	0.930168		-1.30996	0.897495		0.737751	0.959455		-0.688676	0.979833		-0.43259	0.952434		-0.259128	0.965825		-0.620836	0.975187		-0.575154	0.985846		-0.0937051	0.989335		-0.413091	0.983982		0.241553	0.975131		-0.530036	0.86363		-0.0106231	0.990199		-2.43074	0.898975		-0.0972907	0.982209
0.212827	0.978267		0.279903	0.972887		0.0925807	0.972051		-1.61022	0.873931		0.0400052	0.983671		-0.0375438	0.982455		0.0773138	0.969553		0.193259	0.942563		-0.846686	0.952786		-0.359272	0.984952		-0.494924	0.964022		-0.352857	0.966848		0.9247	0.942413		-0.435623	0.917641		-0.0415809	0.986529		-2.60708	0.890198		-0.163285	0.983712
-0.0192246	0.977837		0.337872	0.980938		0.857864	0.913257		-1.65726	0.8721		-0.694624	0.973128		-0.16736	0.985606		0.756436	0.926367		1.77355	0.864684		-0.952365	0.961471		-0.463466	0.979458		-0.77489	0.942456		-0.499122	0.968343		1.4907	0.926995		-0.417494	0.874342		0.0332012	0.984257		-2.18564	0.916518		-0.111442	0.982908
-0.186584	0.973236		-0.110788	0.98006		-0.353161	0.971493		-1.7003	0.859741		-0.685367	0.960933		-0.54291	0.960789		0.633764	0.940944		0.127284	0.820826		-1.45186	0.943705		-0.437575	0.981766		-0.115931	0.979997		-0.742155	0.934657		1.29562	0.916476		-0.318412	0.964536		0.398474	0.980007		-2.42867	0.908885		-0.873522	0.955994
-0.016831	0.969973		-0.384491	0.962042		1.31437	0.89015		-1.74268	0.858591		1.33746	0.942289		-0.355406	0.975567		0.195904	0.973703		-0.00550103	0.759361		-0.881218	0.967908		-0.320807	0.978632		-0.224134	0.982245		-0.0634823	0.97524		-0.224564	0.961781		-0.265281	0.964206		-0.146609	0.9816		-2.68171	0.893941		-1.52256	0.919672
-0.236331	0.964413		-0.0253953	0.938126		0.263316	0.969754		-1.46345	0.893213		-0.115403	0.982753		-0.573727	0.959241		0.31068	0.970663		-0.0956129	0.735332		-1.06911	0.97035		-0.443423	0.967518		-0.595531	0.941063		-0.635601	0.941132		-0.23843	0.971552		-0.661917	0.89281		0.00671476	0.981483		-2.4832	0.899325		-2.43112	0.885014
-0.229025	0.966331		0.659247	0.871274		-0.571302	0.947135		-1.7275	0.872097		0.772128	0.963692		-0.76994	0.920612		-0.10124	0.981299		-0.329509	0.714612		-1.42892	0.95221		-0.639752	0.960093		-0.620249	0.961566		-0.885475	0.921244		-0.180106	0.964597		-0.509711	0.874169		-0.235939	0.982043		-2.71438	0.89244		-2.63471	0.875176
0.110995	0.96073		0.138378	0.872967		0.552423	0.915596		-1.65713	0.884137		0.363035	0.978851		-0.305179	0.904697		-0.19225	0.972357		-0.348254	0.708502		-1.30097	0.955528		-0.908924	0.958365		0.185352	0.969242		-0.629696	0.945914		-0.520006	0.946563		-0.462572	0.892221		-0.0511198	0.977886		-2.63589	0.911335		-1.95253	0.872922
-0.0947476	0.960368		0.446878	0.887836		1.04274	0.902188		-1.14248	0.918404		1.04162	0.962744		-0.522497	0.912398		0.115445	0.974182		-0.15219	0.703311		-1.82222	0.926754		-0.986822	0.953874		-0.181252	0.970778		-1.53848	0.884135		-0.0269076	0.958741		-0.5195	0.854624		0.143396	0.977063		-0.0445497	0.958575		-2.65122	0.86323
-0.0738001	0.961637		-0.143712	0.90369		0.83609	0.918108		-1.52378	0.889524		0.0196077	0.980955		-0.633992	0.940602		-0.423869	0.927384		0.0385475	0.702985		-0.632306	0.96425		-0.704913	0.956531		-0.343795	0.969953		-0.657596	0.938785		-0.119897	0.957579		-0.473746	0.856675		0.0784264	0.976517		-0.454768	0.964312		-1.44256	0.902037
-0.219041	0.960981		0.0871065	0.89273		0.565951	0.947384		-1.55861	0.869724		-0.700156	0.964338		-0.677931	0.963797		-0.134153	0.96964		-0.120473	0.703436		-1.17613	0.958102		-1.14566	0.950401		-0.511219	0.951409		-1.09589	0.927597		0.118738	0.953531		-0.587263	0.849055		0.106393	0.974395		-0.638733	0.963831		-1.67501	0.903376
0.0344851	0.951851		-0.625954	0.872565		-0.0811952	0.969537		-1.65936	0.858827		-0.317868	0.965846		-0.303517	0.968616		-0.170152	0.971508		-0.0495718	0.701646		-1.09251	0.960519		-1.09056	0.963354		-0.0279108	0.978715		-0.901447	0.932757		0.140974	0.967187		-0.212048	0.954476		0.296952	0.974835		-2.1352	0.889016		-1.92613	0.919242
-0.0329632	0.95407		0.947391	0.841713		-0.844753	0.936408		-1.63176	0.884465		-0.235358	0.972881		-0.435885	0.965779		0.623064	0.92083		0.80559	0.68162		-1.05671	0.956228		-0.859328	0.954318		-0.213938	0.966234		1.04166	0.943097		0.235098	0.960816		-0.396925	0.929608		0.0839455	0.970693		-2.0494	0.935936		-0.927044	0.952884
-0.101099	0.960706		0.227468	0.884546		-0.0577696	0.939162		-0.560132	0.926737		-0.277793	0.975414		-0.995394	0.944116		0.276404	0.951802		0.0809156	0.708383		-1.30938	0.955525		-0.836412	0.95351		-0.151287	0.959703		-0.352235	0.962643		1.60708	0.900777		-0.564365	0.889944		0.250986	0.967365		-2.39076	0.886512		-0.824745	0.953956
-0.0731358	0.954161		0.654591	0.881507		1.27188	0.879788		-1.36881	0.88302		-0.786809	0.96038		-0.841634	0.923574		-0.131034	0.975876		0.313398	0.750411		-1.28329	0.951174		-0.702914	0.956349		-0.67908	0.903439		-0.387904	0.954682		0.0374267	0.938269		-0.167849	0.929429		0.50317	0.967444		-1.48311	0.930174		-1.03244	0.951188
-0.236105	0.957492		0.903471	0.82291		0.134002	0.966533		-1.29517	0.900739		-0.805119	0.958707		-0.78875	0.917955		0.0750527	0.974505		0.500904	0.799728		-1.41395	0.947412		-0.201164	0.950787		0.0583765	0.966262		-0.713665	0.928086		-0.377602	0.953572			0.87421		0.273341	0.96707		-2.68815	0.863147		-0.852688	0.957628
-0.227481	0.95817		0.383153	0.863264		0.150514	0.943743		-1.6298	0.861896		-0.507292	0.959636		-1.22041	0.890027		-0.254797	0.963748		1.10747	0.832399		-0.746573	0.937685		-0.495682	0.939984		-0.127514	0.961848		-1.03622	0.902498		-0.461598	0.960435		-0.664911	0.903503		0.121571	0.963012		-2.75724	0.880006		-0.726941	0.953762
-0.4473	0.962307		-0.0477058	0.893334		0.704046	0.896336		-1.55376	0.866277		-0.79447	0.953895		-0.255473	0.916418		-0.208905	0.953149		0.238824	0.829416		-1.13409	0.938134		-0.914308	0.924163		0.0152489	0.962409		-1.70312	0.853158		-0.126448	0.946346		-0.173744	0.878622		0.356301	0.95902		-2.89691	0.858927		-0.696165	0.950412
-0.416602	0.961382		-0.056582	0.892216		0.289148	0.953449		-1.38231	0.892321		0.285115	0.963922		-0.0166719	0.917291		0.313133	0.931725		-0.328999	0.762286		-1.03742	0.947708		-1.50036	0.932563		-0.604907	0.904232		-0.0521668	0.936248		0.869048	0.907365			0.834892		0.116432	0.961935		-1.62761	0.932884		-0.827042	0.950464
-0.169335	0.961773		-0.456007	0.931897		-0.840651	0.927732		-1.60842	0.872708		0.212243	0.955065		-0.452464	0.924797		-0.139598	0.972981		-0.297011	0.728283		-1.58688	0.946408		-1.60728	0.923487		-0.0796502	0.952316		1.3775	0.931285		0.367695	0.939394		-0.567447	0.898603		0.317618	0.95895		-2.10419	0.898172		-1.01917	0.937287
-0.125654	0.961825		0.131745	0.950016		-0.900789	0.917633		-1.74495	0.857644		0.238488	0.950904		-0.648601	0.922712		-0.748604	0.917895		0.0422435	0.717668		-1.62106	0.944598		-1.37488	0.920611		-0.336191	0.946563		-0.320961	0.972897		-0.43304	0.948973		-0.0435893	0.957155		0.541873	0.959926		-2.88963	0.850658		-0.607279	0.944959
-0.32832	0.957262		1.38122	0.873804		-0.910946	0.909243		-1.70258	0.857022		1.33933	0.939696		-0.703052	0.90867		0.463146	0.910731		-0.39598	0.745957		-1.69244	0.94096		-1.66594	0.905978		-0.272696	0.951118		-0.426425	0.963631		-0.406107	0.949483		-1.00526	0.824101		0.142359	0.954371		-2.93385	0.872772		-0.995197	0.936509
2.83494	0.842509		2.94219	0.820685		-0.824934	0.908163		-1.58222	0.864016		-0.23878	0.968261		-0.457483	0.930667		-0.0248982	0.96732		1.45981	0.775458		-1.20359	0.941616		-1.20083	0.907759		-0.0821673	0.951265		-0.427174	0.947169		-0.23686	0.952641		0.413777	0.909231		0.166022	0.95591		-1.73642	0.901136		-1.25858	0.936983
2.65257	0.81414		2.63879	0.829798		-0.783864	0.913494		-1.65945	0.853154		0.873568	0.943098		0.0437166	0.902384		-0.421016	0.922608		-0.0123728	0.893825		-1.20555	0.939963		-0.902562	0.914358		-0.765022	0.906876		-0.666376	0.91554		-0.568864	0.923539		-0.204164	0.932135		0.354178	0.951447		-2.79242	0.861755		-1.46252	0.933647
1.68602	0.853421		1.92666	0.839789		-0.840095	0.901498		-1.15273	0.906887		-0.283953	0.94999		-0.468248	0.86413		0.755936	0.89061		0.0729929	0.901979		-1.49844	0.934591		-0.765542	0.913865		0.32003	0.939681		-0.486244	0.935293		-0.00903956	0.938808		0.209612	0.818695		0.416387	0.95282		-2.71401	0.857999		-1.05089	0.934021
2.23987	0.758429		2.02094	0.703818		1.81311	0.767988		0.525068	0.789576		-0.49597	0.840079		1.251	0.808129		2.60431	0.686513		0.707628	0.576386		-0.20869	0.773846		0.544694	0.795254		2.23022	0.734724		-0.449812	0.841488		3.25453	0.693804		2.21951	0.752075		1.26752	0.729124		-1.71642	0.829456		-0.216621	0.825823
1.92679	0.758294		3.05862	0.689725		2.04762	0.771464		1.09704	0.802378		-0.3903	0.841961		1.07401	0.813454		2.33799	0.678702		2.77449	0.529196		-1.59317	0.789597		0.73398	0.823491		2.14547	0.737424		-0.840123	0.81825		1.46541	0.709358		2.29379	0.741786		1.27968	0.726304		-0.127549	0.846383		-0.0289658	0.841666
1.05809	0.789033		2.80264	0.689536		1.44906	0.799291		0.714452	0.807465		0.878651	0.832481		0.618625	0.81894		2.06865	0.67541		0.819182	0.584026		-2.52586	0.750937		0.822285	0.819942		2.07448	0.743227		-1.25264	0.76557		1.13979	0.728792		2.0706	0.773466		1.55336	0.72133		-0.458607	0.85951		-0.0088096	0.83724
1.06794	0.799259		1.8551	0.712525		0.424969	0.794827		-0.0621771	0.81016		0.282275	0.844746		0.490962	0.808629		1.8808	0.669881		0.476188	0.584853		-1.87786	0.783374		1.0033	0.812535		2.0492	0.757833		-0.781533	0.817911		0.557772	0.740196		2.00071	0.776539		1.97005	0.719004		-0.469193	0.854253		-0.0345317	0.826865
1.40732	0.789609		0.690463	0.736662		-0.13832	0.772502		0.0864604	0.803388		0.652936	0.847598		0.69837	0.823138		1.95532	0.666652		1.12034	0.569017		-0.0194168	0.810459		1.12086	0.80876		2.07868	0.765502		-1.05431	0.791229		0.646701	0.746662		1.27727	0.795156		1.85811	0.707795		-0.599237	0.851083		0.0353565	0.839392
1.092	0.791163		0.666697	0.730011		-0.22724	0.764576		0.0713024	0.797499		-0.75114	0.850645		-0.0760383	0.795663		1.96388	0.66887		1.82039	0.562892		1.34479	0.821896		0.807376	0.803662		1.56828	0.783561		-1.37921	0.765748		0.316708	0.772519		2.38837	0.781323		1.16304	0.724609		-0.897854	0.856884		0.00706166	0.838396
1.03952	0.802087		0.980653	0.729472		-0.339283	0.763967		1.00435	0.785165		-0.263911	0.848542		0.79221	0.787746		1.90118	0.666264		1.72852	0.569234		1.06068	0.82781		0.924908	0.81206		2.05717	0.764993		-0.621946	0.831134		0.519929	0.761101		2.31732	0.767603		0.754416	0.7234		-0.826681	0.852167		0.00540655	0.833126
0.971772	0.791341		0.704298	0.738247		-0.209083	0.763551		0.747736	0.779455		0.317827	0.842274		0.138561	0.75785		1.92129	0.669652		2.35362	0.556091		0.372085	0.828516		1.14638	0.810986		1.22451	0.78735		-1.02605	0.758064		1.27145	0.742722		1.17535	0.763758		1.06312	0.727847		-0.853125	0.853826		-0.729518	0.805482
1.81247	0.77795		0.777341	0.74484		0.118067	0.804859		0.480066	0.786921		0.815041	0.818848		-0.168354	0.803622		1.9152	0.660805		0.756386	0.56526		0.068881	0.822859		1.19865	0.807672		2.00424	0.744114		-1.95043	0.713773		1.27762	0.726136		1.44557	0.8009		1.60503	0.717685		-1.22588	0.856415		-0.5846	0.808717
1.70192	0.76236		0.634431	0.749106		2.05963	0.762776		0.412967	0.785296		-0.368028	0.851892		-0.999868	0.784004		1.9515	0.66274		0.689316	0.571857		-0.362089	0.830823		0.912965	0.803409		1.12378	0.785936		-0.687153	0.803298		0.261524	0.744534		0.699235	0.772453		1.52905	0.683561		-0.807967	0.850939		-0.106365	0.807166
1.11115	0.791792		0.644375	0.748414		1.22593	0.800097		0.409709	0.786583		-0.132203	0.835392		-1.32595	0.780199		1.928	0.670555		1.42878	0.554384		-0.61186	0.831121		0.955328	0.809789		1.4718	0.781182		-0.903446	0.7871		0.48023	0.746236		0.498051	0.779519		1.21501	0.685839		-0.701619	0.848153		0.195862	0.810078
0.925959	0.804171		1.58572	0.713175		-0.256336	0.767271		0.415043	0.779572		1.5507	0.805673		-0.200509	0.806467		1.68068	0.664118		2.07797	0.564742		0.0318504	0.830135		0.729547	0.796118		1.50939	0.7767		-1.0191	0.790888		0.16135	0.736653		0.417034	0.782568		1.49881	0.686324		-0.608498	0.847621		0.935955	0.780322
1.09178	0.793936		2.15475	0.689111		0.096959	0.798838		0.392496	0.780225		-0.243696	0.842989		-0.156034	0.79637		1.72086	0.656527		0.500656	0.58452		-0.0477101	0.825017		0.771813	0.799615		1.36071	0.793522		-1.80286	0.699934		0.523592	0.732824		1.19442	0.797804		1.7976	0.690067		-0.588911	0.847912		0.837786	0.782124
1.09921	0.789137		0.795314	0.715016		0.0417485	0.790061		0.314478	0.779403		-0.345629	0.849733		-0.907333	0.775509		1.73596	0.65272		0.375466	0.598858		0.134676	0.832331		0.456367	0.801754		1.29087	0.787342		-1.73417	0.724699		0.399616	0.724199		1.70509	0.787737		1.70103	0.690588		-0.625819	0.849672		0.335411	0.795939
1.19425	0.792051		0.494239	0.7411		-0.0998734	0.769129		0.336234	0.778837		0.73637	0.807019		-0.27079	0.814015		1.78512	0.656651		1.73362	0.534102		0.269324	0.833822		0.494787	0.787637		1.83884	0.770017		-0.645624	0.807989		0.0248608	0.713982		1.11797	0.804855		1.77718	0.686161		-0.442147	0.845876		0.191071	0.786415
1.24408	0.778965		0.553497	0.741925		-0.141633	0.768811		0.262323	0.776754		0.992571	0.823864		-0.282752	0.816391		1.77137	0.65843		2.0802	0.548341		0.0486195	0.833358		0.542003	0.790589		1.74598	0.785928		0.504812	0.79803		0.753964	0.710393		1.34848	0.795583		1.84755	0.679196		-0.42226	0.835352		-0.391964	0.789343
1.06657	0.800918		0.69222	0.75284		-0.231342	0.770841		0.354886	0.770583		-0.325454	0.831218		-0.0107985	0.824064		1.86918	0.661285		0.373001	0.574589		0.23926	0.829151		1.88332	0.776305		1.07423	0.793649		0.138702	0.848101		0.538211	0.720889		1.64672	0.763044		1.40185	0.673998		-0.585318	0.838543		-1.55542	0.736978
1.20513	0.800179		0.639632	0.743024		2.29133	0.759845		0.167068	0.763727		-0.222339	0.830494		-0.770093	0.800192		1.7018	0.660086		1.14235	0.539955		-0.0841629	0.825525		2.06849	0.789074		0.751448	0.804076		-0.479651	0.834757		0.840714	0.708386		1.75423	0.778346		0.602849	0.661884		-0.604609	0.838433		-0.740534	0.782681
1.58925	0.797527		0.616709	0.740388		2.11937	0.770898		0.160096	0.770026		0.976063	0.791812		0.0487081	0.816961		1.67749	0.650982		2.34317	0.534868		0.0419371	0.823859		1.67276	0.794765		1.07304	0.805281		-0.902581	0.803616		1.77403	0.690791		1.76872	0.78989		1.34153	0.677556		-0.781196	0.834172		-0.845857	0.767786
1.80999	0.757847		1.66867	0.694687		1.26443	0.80776		0.137085	0.76986		1.31848	0.800316		0.0956476	0.812555		1.62409	0.667004		1.74552	0.54042		0.125195	0.820506		0.991434	0.781119		0.951735	0.790625		-0.492623	0.844523		0.400473	0.706662		0.707853	0.765026		1.5268	0.683204		-0.754159	0.841183		-1.31346	0.754446
3.02371	0.697345		2.73769	0.64798		0.877609	0.814309		0.230705	0.764809		0.918273	0.821935		-1.20988	0.741526		1.51488	0.651241		0.443298	0.56654		0.386015	0.820075		0.471691	0.781485		0.763855	0.801622		-0.726535	0.8111		0.0872314	0.717672		1.62847	0.793215		1.21572	0.664718		-0.745444	0.842141		-1.16535	0.768761
2.71976	0.71447		2.41297	0.633683		0.609141	0.812229		0.124834	0.770549		1.28499	0.804213		0.387738	0.816509		1.61227	0.654098		0.390237	0.571303		0.304958	0.818411		0.138714	0.793342		0.611911	0.808902		-1.14584	0.769217		0.186855	0.725037		1.18209	0.786855		0.764436	0.641606		-0.711226	0.840494		-0.678769	0.774553
1.33989	0.751672		1.32268	0.687816		-0.0990868	0.778659		0.209506	0.776842		0.230134	0.831999		-0.986113	0.739614		2.09168	0.672951		0.849371	0.548096		0.0907381	0.820491		0.209514	0.788907		0.683094	0.800884		-1.96602	0.704541		0.891579	0.711466		0.916665	0.794352		0.147096	0.639265		-0.70746	0.842068		-0.843248	0.786354
0.89582	0.781986		0.720485	0.721896		0.14779	0.782397		0.0649457	0.768891		0.828168	0.81327		-1.55566	0.737179		2.4168	0.682177		1.46739	0.544142		0.421002	0.821582		0.248127	0.78772		0.42332	0.797079		-0.772088	0.788513		0.39469	0.727512		0.697164	0.764893		-1.5706	0.52499		-0.781939	0.837919		-1.19054	0.784034
0.846569	0.789235		0.586631	0.723661		1.99633	0.752249		0.0487297	0.769793		2.78704	0.753409		-2.91825	0.713121		2.22213	0.676903		0.590487	0.562959		0.438363	0.826424		0.371651	0.789974		0.595511	0.794529		-1.22944	0.751029		0.0292579	0.720814		0.801945	0.778839		0.158565	0.607783		-0.860583	0.835422		-0.726114	0.796225
0.794259	0.796252		0.640104	0.724585		2.27351	0.771654		0.042571	0.768155		1.33144	0.808008		-2.14222	0.792407		1.82421	0.6731		1.68184	0.528687		0.0950891	0.822322		0.46892	0.782695		1.10008	0.789552		-1.41911	0.696355		-0.0329856	0.714932		0.554147	0.779075		0.336162	0.669277		-0.895788	0.841106		-0.946792	0.779693
0.905073	0.803442		1.01011	0.716348		0.959133	0.808364		0.0275498	0.769358		-0.243135	0.821704		0.488632	0.804575		1.73071	0.658042		2.05553	0.541002		0.313225	0.826692		0.388056	0.779315		1.83141	0.782019		-0.851404	0.778473		0.00859362	0.711086		0.289382	0.789168		0.522035	0.676057		-0.860268	0.842822		-0.332105	0.789545
1.97922	0.762363		0.66139	0.737357		0.0593322	0.777747		0.0861523	0.767363		-0.324753	0.820011		-0.108998	0.783017		1.85237	0.656196		0.698142	0.562017		0.335251	0.817218		0.74936	0.772781		1.92626	0.770459		-1.20064	0.743131		0.432556	0.716526		0.388763	0.781555		0.131532	0.668862		-0.809885	0.836944		-0.640496	0.797651
1.44918	0.767895		1.44372	0.700892		-0.238508	0.761225		0.11352	0.770372		-0.0193687	0.821814		-0.58622	0.78708		1.92271	0.658209		0.24907	0.570511		0.294513	0.810971		-0.744843	0.776544		1.77087	0.778635		-1.74841	0.733047		1.99572	0.670207		0.214467	0.770541		0.26416	0.65854		-0.630232	0.837034		-0.676163	0.806069
0.922791	0.797866		1.33619	0.672049		0.0196086	0.767882		-0.0288526	0.76234		-0.153298	0.819384		-1.09452	0.79064		1.90869	0.654204		0.768706	0.550522		0.466159	0.820918		-0.632635	0.777045		1.79104	0.771979		-0.642091	0.812021		1.72707	0.693514		0.232063	0.775324		0.00224863	0.684367		-0.660276	0.836417		-0.75357	0.797629
0.78194	0.967337		0.327386	0.969024		0.755245	0.973909		-0.0306335	0.9624		0.103965	0.972614		0.672076	0.873781		0.313413	0.962901		0.873078	0.930108		0.936356	0.938676		0.701824	0.953591		0.12605	0.987978		-1.54081	0.890355		-0.0916838	0.969887		-0.0508554	0.901859		-0.00584322	0.970976		-0.637201	0.941482		0.377445	0.957233
0.415892	0.981242		0.346555	0.957222		0.171933	0.984336		0.183282	0.971988		1.18026	0.950331		1.18911	0.94584		0.165641	0.969092		0.473924	0.98414		0.819534	0.971532		0.144102	0.984047		-0.00582698	0.993302		0.0987252	0.984713		-0.0929921	0.979478		-0.0576198	0.92201		-0.0305109	0.989542		0.367354	0.974184		0.982829	0.918331
0.0962036	0.990881		-0.00719461	0.984974		-0.773237	0.939723		-0.0713158	0.973153		0.161654	0.99005		1.00521	0.960758		-0.0071135	0.987447		0.00600221	0.994312		0.474057	0.978367		0.369029	0.991978		0.149906	0.98881		-1.39762	0.919971		0.110206	0.982354		0.265039	0.977992		-0.128695	0.992804		0.289082	0.985129		0.843159	0.94486
0			0			0			0			0			0			0			0			0			0			0			0			0			0			0			0			0
0.152074	0.980557		-0.312024	0.981884		-0.193184	0.991131		-0.522057	0.953094		-0.12852	0.987932		0.956577	0.957426		0.088374	0.986381		-0.0992506	0.990894		-0.273751	0.987762		-0.296791	0.991758		-0.171468	0.989733		-0.942784	0.930493		0.0795574	0.976504		-0.302737	0.888731		0.0995613	0.994446		-1.34767	0.936908		-1.28229	0.972923
0.10882	0.981654		-0.211207	0.989076		0.10207	0.989284		-1.38127	0.868538		0.899406	0.950878		0.316533	0.976923		-0.439704	0.964088		-0.253126	0.970768		-0.146779	0.982332		-0.206124	0.99004		0.0562012	0.991434		-1.81071	0.916589		0.351758	0.975047		-0.264997	0.872415		-0.139318	0.99286		-2.14166	0.919039		0.745868	0.939916
0.309031	0.975565		0.272708	0.965942		-0.680657	0.968499		-1.68154	0.849732		0.20166	0.985453		0.967665	0.93983		0.0702003	0.967085		0.199261	0.943866		-0.372628	0.974279		0.00975717	0.988538		-0.345018	0.984803		-1.75048	0.902663		1.03491	0.933338		-0.170584	0.92247		-0.170276	0.989455		-2.318	0.906844		0.679874	0.949371
0.076979	0.979139		0.330677	0.977354		0.0846266	0.983558		-1.72857	0.851367		-0.532969	0.976408		0.837848	0.95925		0.749322	0.92135		1.77956	0.866417		-0.478308	0.974859		-0.0944372	0.983338		-0.624984	0.970044		-1.89674	0.887876		1.60091	0.915615		-0.152455	0.879545		-0.0954934	0.986733		-1.89656	0.92215		0.731717	0.922883
-0.0903807	0.978127		-0.117982	0.985207		-1.1264	0.920736		-1.77161	0.837454		-0.523712	0.965564		0.462299	0.982897		0.62665	0.939437		0.133286	0.819434		-0.977805	0.959711		-0.0685455	0.985845		0.0339754	0.967938		-2.13977	0.877526		1.40583	0.903433		-0.0533728	0.958985		0.26978	0.981991		-2.13958	0.91275		-0.030363	0.978489
0.0793727	0.967761		-0.391685	0.96472		0.541131	0.976902		-1.81399	0.836157		1.49912	0.932082		0.649803	0.954988		0.18879	0.972828		0.000501185	0.757267		-0.407161	0.960076		0.0482225	0.981748		-0.074228	0.989		-1.4611	0.906122		-0.114358	0.966101		-0.0002415	0.975786		-0.275304	0.985173		-2.39263	0.898665		-0.679403	0.977155
-0.140127	0.969474		-0.0325899	0.944582		-0.509922	0.962107		-1.53477	0.87337		0.0462514	0.980316		0.431481	0.938101		0.303567	0.971896		-0.0896107	0.734695		-0.595052	0.961204		-0.0743937	0.970861		-0.445625	0.969228		-2.03322	0.880099		-0.128224	0.978718		-0.396878	0.902295		-0.12198	0.984175		-2.19412	0.90681		-1.58796	0.960918
-0.132822	0.968356		0.652052	0.861072		-1.34454	0.859473		-1.79882	0.846575		0.933783	0.953548		0.235269	0.874031		-0.108353	0.989466		-0.323507	0.710391		-0.954858	0.95992		-0.270723	0.964866		-0.470343	0.977987		-2.28309	0.848147		-0.0699009	0.976999		-0.244672	0.879293		-0.364634	0.983342		-2.4253	0.897318		-1.79155	0.952327
0.207199	0.959451		0.131183	0.878101		-0.220814	0.975272		-1.72845	0.863515		0.52469	0.971668		0.70003	0.850967		-0.199364	0.981198		-0.342252	0.708864		-0.826917	0.950743		-0.539895	0.961861		0.335259	0.952482		-2.02732	0.877924		-0.4098	0.965204		-0.197533	0.895952		-0.179814	0.97944		-2.34681	0.912361		-1.10938	0.952011
0.00145606	0.9609		0.439684	0.888047		0.269507	0.975726		-1.21379	0.902921		1.20327	0.952714		0.482711	0.867451		0.108331	0.978484		-0.146188	0.70313		-1.34816	0.938834		-0.617793	0.957841		-0.0313455	0.984057		-2.9361	0.840536		0.083298	0.952142		-0.254461	0.857323		0.0147013	0.979537		0.244532	0.954261		-1.80806	0.938525
0.0224035	0.964299		-0.150906	0.901394		0.0628528	0.977285		-1.59509	0.867511		0.181262	0.975997		0.371216	0.901709		-0.430982	0.943014		0.0445497	0.703024		-0.158248	0.953079		-0.335884	0.959833		-0.193889	0.981372		-2.05522	0.871113		-0.00969142	0.952146		-0.208707	0.864212		-0.0502682	0.981252		-0.165686	0.961548		-0.599399	0.957855
-0.122837	0.963096		0.0799119	0.89878		-0.207286	0.972824		-1.62993	0.845311		-0.538502	0.96736		0.327278	0.941984		-0.141267	0.974802		-0.114471	0.703484		-0.702071	0.956759		-0.776632	0.952638		-0.361313	0.973018		-2.49351	0.869585		0.228944	0.949652		-0.322223	0.858284		-0.0223016	0.979288		-0.349652	0.96144		-0.831849	0.961571
0.130689	0.95159		-0.633149	0.87487		-0.854433	0.941803		-1.73068	0.835203		-0.156214	0.958536		0.701691	0.933561		-0.177265	0.980284		-0.0435696	0.698762		-0.618456	0.950304		-0.721527	0.964455		0.121996	0.973757		-2.29907	0.868441		0.25118	0.964415		0.0529917	0.945496		0.168257	0.978257		-1.84612	0.895514		-1.08298	0.962799
0.0632404	0.95422		0.940197	0.844257		-1.61799	0.843853		-1.70307	0.867487		-0.0737034	0.969933		0.569324	0.956065		0.615951	0.916188		0.811592	0.680705		-0.582654	0.948559		-0.490299	0.955243		-0.0640317	0.981239		-0.355962	0.959264		0.345303	0.950905		-0.131886	0.933835		-0.0447491	0.973701		-1.76031	0.937541		-0.0838855	0.957086
-0.00489492	0.963129		0.220274	0.88893		-0.831007	0.946165		-0.631448	0.912642		-0.116139	0.975845		0.00981492	0.973302		0.26929	0.954406		0.0869178	0.705151		-0.835325	0.942536		-0.467383	0.955459		-0.00138101	0.973427		-1.74985	0.913435		1.71729	0.882548		-0.299326	0.894255		0.122292	0.972233		-2.10168	0.889961		0.0184142	0.951162
0.0230678	0.952001		0.647397	0.880093		0.49864	0.969913		-1.44013	0.857873		-0.625154	0.965318		0.163574	0.959372		-0.138148	0.980724		0.3194	0.747144		-0.809232	0.9495		-0.333885	0.957515		-0.529174	0.93923		-1.78552	0.90286		0.147632	0.927026		0.0971904	0.931515		0.374476	0.971776		-1.19402	0.926325		-0.189279	0.950488
-0.139901	0.964889		0.896276	0.820304		-0.639236	0.950504		-1.36649	0.884733		-0.643464	0.963256		0.216459	0.944795		0.0679392	0.976191		0.506906	0.794126		-0.939894	0.951393		0.167865	0.951664		0.208283	0.963108		-2.11129	0.881487		-0.267396	0.951646			0.876247		0.144646	0.971595		-2.39906	0.869302		-0.00952942	0.930944
-0.131277	0.963126		0.375959	0.863914		-0.622723	0.965547		-1.70111	0.837706		-0.345638	0.96525		-0.2152	0.941476		-0.26191	0.970121		1.11348	0.830551		-0.272516	0.948459		-0.126653	0.941977		0.0223928	0.972291		-2.43384	0.853518		-0.351393	0.962089		-0.399871	0.901832		-0.00712342	0.965782		-2.46816	0.887101		0.116218	0.92652
-0.351096	0.965795		-0.0549004	0.892859		-0.0691914	0.97476		-1.62508	0.845052		-0.632816	0.959234		0.749736	0.899792		-0.216019	0.964074		0.244827	0.827254		-0.660034	0.950712		-0.545279	0.931731		0.165155	0.961897		-3.10074	0.819194		-0.0162428	0.942259		0.0912955	0.882378		0.227606	0.962745		-2.60783	0.864981		0.146994	0.931793
-0.320399	0.965528		-0.0637766	0.896351		-0.484089	0.964551		-1.45362	0.871836		0.446769	0.955302		0.988537	0.889833		0.30602	0.925353		-0.322996	0.755694		-0.563362	0.936579		-1.13134	0.939471		-0.455001	0.940144		-1.44979	0.93558		0.979254	0.891387			0.84077		-0.0122628	0.96262		-1.33853	0.923398		0.0161166	0.929058
-0.0731312	0.958577		-0.463202	0.913659		-1.61389	0.83112		-1.67973	0.849108		0.373898	0.951338		0.552745	0.93456		-0.146711	0.968866		-0.291009	0.724845		-1.11282	0.942781		-1.23825	0.928866		0.0702561	0.963061		-0.0201227	0.953083		0.477901	0.938544		-0.302408	0.897321		0.188924	0.962671		-1.81511	0.899923		-0.176012	0.943249
-0.0294504	0.961933		0.12455	0.943665		-1.67403	0.824252		-1.81626	0.838463		0.400143	0.941724		0.356608	0.931018		-0.755717	0.929623		0.0482457	0.714751		-1.147	0.937957		-1.00585	0.923986		-0.186285	0.963458		-1.71858	0.913739		-0.322834	0.960024		0.22145	0.951498		0.413178	0.963183		-2.60055	0.855351		0.23588	0.917686
-0.232116	0.959687		1.37403	0.859808		-1.68418	0.821524		-1.7739	0.839333		1.50099	0.925921		0.302157	0.938957		0.456033	0.906662		-0.389978	0.739652		-1.21838	0.937365		-1.29692	0.909233		-0.122789	0.968716		-1.82404	0.91288		-0.295901	0.958326		-0.740226	0.829955		0.0136642	0.955453		-2.64477	0.875658		-0.152038	0.919408
2.93114	0.848133		2.93499	0.801014		-1.59817	0.823225		-1.65354	0.838897		-0.0771256	0.959538		0.547726	0.898782		-0.0320117	0.971723		1.46582	0.774275		-0.729535	0.939207		-0.831797	0.911813		0.0677391	0.964942		-1.82479	0.895291		-0.126654	0.957189		0.678816	0.906972		0.0373273	0.958342		-1.44733	0.894352		-0.415423	0.910532
2.74877	0.813723		2.6316	0.809525		-1.5571	0.84082		-1.73077	0.828808		1.03522	0.930035		1.04893	0.833557		-0.428129	0.932445		-0.00637056	0.890962		-0.731492	0.934438		-0.533533	0.91774		-0.615116	0.941502		-2.064	0.874255		-0.458659	0.935383		0.0608747	0.93736		0.225483	0.954404		-2.50334	0.863655		-0.619361	0.932141
1.78223	0.845136		1.91946	0.822209		-1.61333	0.813334		-1.22405	0.904576		-0.122298	0.942885		0.536961	0.826789		0.748822	0.88455		0.0789951	0.898062		-1.02439	0.930299		-0.396512	0.917092		0.469937	0.931048		-1.88386	0.871648		0.101166	0.9349		0.474652	0.82552		0.287692	0.954807		-2.42493	0.85839		-0.207734	0.905255
2.33607	0.757837		2.01375	0.692915		1.03987	0.841108		0.453753	0.813226		-0.334316	0.841744		2.25621	0.750741		2.5972	0.689475		0.71363	0.57139		0.265367	0.773306		0.913723	0.796965		2.38013	0.73559		-1.84743	0.831423		3.36473	0.668642		2.48455	0.732626		1.13883	0.730227		-1.42733	0.817602		0.626538	0.794918
2.023	0.748339		3.05142	0.675706		1.27439	0.84194		1.02572	0.826856		-0.228645	0.837379		2.07922	0.752117		2.33088	0.685618		2.78049	0.522169		-1.11912	0.792764		1.10301	0.822268		2.29538	0.737666		-2.23774	0.804796		1.57561	0.690081		2.55883	0.729588		1.15099	0.729324		0.161533	0.828927		0.814193	0.77522
1.15429	0.776292		2.79544	0.673468		0.675818	0.841896		0.643136	0.830982		1.04031	0.824986		1.62383	0.765244		2.06154	0.683503		0.825184	0.57696		-2.05181	0.756465		1.19131	0.817527		2.22439	0.741777		-2.65026	0.749647		1.25	0.711399		2.33564	0.760097		1.42466	0.723279		-0.169525	0.845214		0.834349	0.773992
1.16414	0.788875		1.8479	0.70127		-0.348268	0.761935		-0.133493	0.801239		0.44393	0.837995		1.49617	0.765527		1.87368	0.678689		0.48219	0.579297		-1.40381	0.785126		1.37233	0.807542		2.19911	0.75663		-2.17915	0.800907		0.667978	0.724816		2.26575	0.768353		1.84135	0.72167		-0.180112	0.840879		0.808627	0.75397
1.50353	0.780308		0.683268	0.73029		-0.911557	0.711465		0.0151446	0.808865		0.814591	0.842753		1.70358	0.786534		1.9482	0.675023		1.12634	0.563735		0.454641	0.797483		1.48989	0.806142		2.22858	0.763247		-2.45193	0.78278		0.756906	0.722492		1.54231	0.788586		1.72942	0.711292		-0.310155	0.838912		0.878515	0.77278
1.18821	0.779714		0.659503	0.725399		-1.00048	0.705192		-1.34299e-05	0.794179		-0.589486	0.855628		0.92917	0.801668		1.95677	0.678467		1.82639	0.557004		1.81884	0.801639		1.17641	0.803295		1.71818	0.781529		-2.77683	0.748051		0.426914	0.757681		2.65341	0.764696		1.03435	0.725507		-0.608773	0.846528		0.850221	0.779471
1.13573	0.79135		0.973458	0.72285		-1.11252	0.699518		0.933035	0.813398		-0.102256	0.845931		1.79742	0.726609		1.89407	0.675471		1.73452	0.560093		1.53473	0.809099		1.29394	0.810893		2.20708	0.763224		-2.01957	0.799894		0.630134	0.748472		2.58236	0.755965		0.625721	0.723383		-0.537599	0.839704		0.848565	0.763995
1.06798	0.778734		0.697103	0.733022		-0.982321	0.705974		0.676421	0.801303		0.479481	0.840109		1.14377	0.783051		1.91418	0.679015		2.35962	0.549941		0.846142	0.810198		1.51541	0.80819		1.37442	0.785688		-2.42367	0.74689		1.38166	0.722479		1.44039	0.763595		0.934426	0.727885		-0.564044	0.843169		0.113641	0.820123
1.90867	0.772248		0.770146	0.738687		-0.655171	0.787641		0.40875	0.811224		0.976695	0.808871		0.836855	0.792129		1.90808	0.672251		0.762389	0.558975		0.542938	0.806576		1.56768	0.804373		2.15415	0.742194		-3.34805	0.705512		1.38782	0.706612		1.71061	0.783274		1.47634	0.718748		-0.936799	0.846134		0.258559	0.803004
1.79813	0.75134		0.627236	0.743841		1.2864	0.844904		0.341652	0.808226		-0.206373	0.852758		0.00534116	0.796909		1.94439	0.672855		0.695318	0.565299		0.111968	0.813044		1.28199	0.801021		1.27368	0.781535		-2.08477	0.765157		0.37173	0.741215		0.964274	0.779425		1.40036	0.687436		-0.518885	0.841047		0.736794	0.766808
1.20736	0.779827		0.63718	0.743912		0.452693	0.835516		0.338394	0.80766		0.0294512	0.830915		-0.320742	0.770848		1.92088	0.679423		1.43479	0.547052		-0.137802	0.81848		1.32436	0.807935		1.6217	0.776049		-2.30107	0.760082		0.590436	0.734298		0.76309	0.784609		1.08632	0.68997		-0.412537	0.839125		1.03902	0.761566
1.02216	0.793668		1.57852	0.70356		-1.02957	0.701879		0.343727	0.798179		1.71235	0.798266		0.804699	0.773864		1.67357	0.674991		2.08397	0.55835		0.505908	0.820047		1.09858	0.794883		1.6593	0.773335		-2.41672	0.765482		0.271556	0.728103		0.682073	0.784745		1.37011	0.6888		-0.319416	0.834899		1.77911	0.76036
1.18798	0.782288		2.14755	0.675717		-0.676278	0.756405		0.32118	0.804142		-0.0820411	0.842912		0.849174	0.775354		1.71374	0.666597		0.506658	0.574739		0.426347	0.808836		1.14084	0.797823		1.51062	0.787689		-3.20048	0.692621		0.633797	0.722417		1.45946	0.777476		1.66891	0.691765		-0.299829	0.834778		1.68095	0.722645
1.19542	0.777361		0.78812	0.708419		-0.731489	0.739457		0.243163	0.800296		-0.183974	0.852236		0.0978754	0.798216		1.72884	0.662323		0.381468	0.593136		0.608734	0.816953		0.825396	0.798366		1.44078	0.784131		-3.13179	0.718672		0.509822	0.721413		1.97013	0.763459		1.57233	0.692107		-0.336738	0.839887		1.17857	0.737162
1.29046	0.78108		0.487045	0.735254		-0.873111	0.714143		0.264918	0.797626		0.898025	0.796243		0.734419	0.80114		1.77801	0.667618		1.73962	0.525833		0.743382	0.818722		0.863816	0.786221		1.98875	0.769758		-2.04324	0.772086		0.135066	0.712523		1.38301	0.794331		1.64848	0.687911		-0.153065	0.837626		1.03423	0.748873
1.34028	0.765364		0.546303	0.737447		-0.914871	0.714222		0.191007	0.795713		1.15423	0.820586		0.722457	0.806523		1.76426	0.669181		2.0862	0.542545		0.522677	0.811789		0.911032	0.788235		1.89589	0.784809		-0.892808	0.860698		0.86417	0.694279		1.61352	0.779145		1.71886	0.681957		-0.133178	0.828027		0.451195	0.75741
1.16277	0.788501		0.685025	0.74533		-1.00458	0.73359		0.28357	0.789554		-0.1638	0.832486		0.99441	0.802189		1.86206	0.67141		0.379003	0.568253		0.713318	0.807248		2.25235	0.78051		1.22413	0.795164		-1.25892	0.843073		0.648416	0.710728		1.91176	0.751202		1.27315	0.675295		-0.296236	0.833582		-0.712266	0.792619
1.30133	0.788339		0.632437	0.735416		1.51809	0.850471		0.0957525	0.784643		-0.0606848	0.83279		0.235115	0.807297		1.69469	0.670817		1.14835	0.53085		0.389895	0.799063		2.43751	0.787854		0.901354	0.804893		-1.87727	0.823577		0.950919	0.69567		2.01927	0.764473		0.474154	0.662763		-0.315527	0.833592		0.102624	0.762217
1.68545	0.79136		0.609515	0.733327		1.34614	0.847815		0.0887797	0.790081		1.13772	0.782408		1.05392	0.806536		1.67037	0.6623		2.34917	0.525927		0.515995	0.802104		2.04178	0.795586		1.22295	0.803331		-2.3002	0.784598		1.88424	0.670634		2.03376	0.777729		1.21283	0.67909		-0.492114	0.830659		-0.0026981	0.775007
1.90619	0.750536		1.66147	0.685287		0.491193	0.848788		0.0657691	0.788398		1.48013	0.792346		1.10086	0.797342		1.61698	0.676207		1.75152	0.531255		0.599253	0.802489		1.36046	0.781131		1.10164	0.787161		-1.89024	0.826292		0.510679	0.693227		0.972892	0.768062		1.39811	0.684237		-0.465078	0.838183		-0.470303	0.772651
3.11991	0.701019		2.7305	0.634581		0.104371	0.830354		0.159389	0.786652		1.07993	0.819435		-0.204668	0.786893		1.50776	0.661521		0.4493	0.559284		0.860073	0.800629		0.84072	0.784216		0.913761	0.802708		-2.12415	0.791921		0.197437	0.706484		1.89351	0.772699		1.08702	0.667332		-0.456362	0.837528		-0.322194	0.764996
2.81596	0.715673		2.40577	0.618982		-0.164096	0.820078		0.053518	0.791015		1.44664	0.794219		1.39295	0.785926		1.60516	0.663927		0.396239	0.563875		0.779015	0.801922		0.507743	0.797667		0.761817	0.810479		-2.54346	0.760267		0.29706	0.706287		1.44713	0.772907		0.635741	0.642613		-0.422144	0.838086		0.164389	0.770232
1.43609	0.742076		1.31548	0.677669		-0.872324	0.719649		0.13819	0.7977		0.391789	0.833559		0.0190961	0.782172		2.08457	0.682057		0.855373	0.541216		0.564796	0.805469		0.578543	0.792927		0.833001	0.798849		-3.36364	0.696776		1.00178	0.693013		1.1817	0.786364		0.0184015	0.640358		-0.418379	0.838093		-8.86395e-05	0.780043
0.992024	0.773989		0.71329	0.712745		-0.625447	0.73854		-0.0063701	0.787614		0.989822	0.808645		-0.550452	0.77814		2.40968	0.690075		1.47339	0.536625		0.895059	0.804397		0.617156	0.789234		0.573226	0.798142		-2.16971	0.768948		0.504896	0.715484		0.962203	0.763707		-1.69929	0.524834		-0.492857	0.835028		-0.347383	0.785013
0.942773	0.779531		0.579436	0.71766		1.22309	0.841014		-0.0225861	0.78882		2.94869	0.737828		-1.91304	0.753723		2.21502	0.684716		0.596489	0.554335		0.91242	0.806998		0.74068	0.790974		0.745417	0.791053		-2.62706	0.73307		0.139464	0.710445		1.06698	0.773902		0.0298706	0.609441		-0.571501	0.834725		0.117045	0.763417
0.890463	0.788228		0.63291	0.716082		1.50027	0.846196		-0.0287448	0.788757		1.49309	0.800442		-1.13701	0.773227		1.81709	0.680676		1.68784	0.520873		0.569147	0.799442		0.837949	0.782092		1.24998	0.78471		-2.81673	0.692218		0.07722	0.703524		0.819186	0.787489		0.207467	0.670504		-0.606706	0.839341		-0.103633	0.782012
1.00128	0.793891		1.00292	0.706461		0.185896	0.812926		-0.0437661	0.788521		-0.0814801	0.823796		1.49384	0.730558		1.7236	0.668358		2.06153	0.533589		0.787282	0.803651		0.757085	0.780267		1.98132	0.781286		-2.24902	0.753117		0.118799	0.700695		0.554421	0.792729		0.39334	0.674569		-0.571187	0.840633		0.511054	0.756566
2.07542	0.755329		0.654196	0.727519		-0.713905	0.724523		0.0148365	0.787543		-0.163098	0.825322		0.896211	0.729825		1.84525	0.666169		0.704144	0.551667		0.809308	0.787928		1.11839	0.775836		2.07616	0.771028		-2.59826	0.72221		0.542762	0.700344		0.653802	0.782826		0.00283782	0.668815		-0.520804	0.836363		0.202662	0.779162
1.54539	0.753838		1.43653	0.689655		-1.01175	0.696307		0.0422045	0.790533		0.142286	0.827673		0.418989	0.753549		1.9156	0.668204		0.255073	0.560694		0.768571	0.78297		-0.375814	0.780555		1.92077	0.77842		-3.14603	0.722454		2.10593	0.63982		0.479506	0.771841		0.135466	0.65962		-0.341151	0.829455		0.166996	0.755065
1.01899	0.785288		1.32899	0.660721		-0.753629	0.712234		-0.100168	0.782345		0.0083569	0.825784		-0.0893117	0.795216		1.90158	0.664315		0.774708	0.541135		0.940217	0.79707		-0.263606	0.781711		1.94094	0.773859		-2.03971	0.775043		1.83727	0.6742		0.497102	0.777896		-0.126446	0.68418		-0.371195	0.825145		0.0895891	0.779919
0.629866	0.963489		0.63941	0.940978		0.948429	0.968882		0.491423	0.90996		0.232484	0.965553		-0.2845	0.934876		0.225039	0.977388		0.972329	0.936694		1.21011	0.942651		0.998615	0.958954		0.297518	0.981473		-0.598024	0.932284		-0.171241	0.974341		0.251882	0.971142		-0.105405	0.974883		0.710467	0.896492		1.65974	0.927262
0.263817	0.979386		0.658579	0.927424		0.365117	0.979002		0.705339	0.943102		1.30878	0.924174		0.232531	0.982517		0.0772671	0.979719		0.573174	0.981319		1.09329	0.966855		0.440893	0.980566		0.165641	0.987946		1.04151	0.945737		-0.172549	0.978426		0.245117	0.972128		-0.130072	0.989435		1.71502	0.907932		2.26512	0.876483
-0.0558707	0.982671		0.304829	0.98201		-0.580053	0.940985		0.450741	0.97104		0.290174	0.980906		0.0486319	0.989841		-0.0954875	0.984747		0.105253	0.989709		0.747809	0.972681		0.66582	0.987823		0.321374	0.988423		-0.454836	0.979676		0.0306482	0.973604		0.567776	0.880874		-0.228256	0.99099		1.63675	0.916822		2.12545	0.902964
-0.152074	0.980557		0.312024	0.981884		0.193184	0.991131		0.522057	0.953094		0.12852	0.987932		-0.956577	0.957426		-0.088374	0.986381		0.0992506	0.990894		0.273751	0.987762		0.296791	0.991758		0.171468	0.989733		0.942784	0.930493		-0.0795574	0.976504		0.302737	0.888731		-0.0995613	0.994446		1.34767	0.936908		1.28229	0.972923
0			0			0			0			0			0			0			0			0			0			0			0			0			0			0			0			0
-0.0432546	0.992251		0.100816	0.984514		0.295254	0.990698		-0.859216	0.952455		1.02793	0.927015		-0.640044	0.979524		-0.528078	0.936871		-0.153875	0.983711		0.126972	0.991645		0.0906666	0.990075		0.227669	0.988173		-0.867927	0.978369		0.272201	0.990192		0.0377402	0.991387		-0.238879	0.996068		-0.793989	0.984696		2.02816	0.900403
0.156957	0.989823		0.584732	0.950734		-0.487472	0.96946		-1.15948	0.933439		0.330179	0.98052		0.011088	0.988081		-0.0181737	0.97457		0.298511	0.958622		-0.0988773	0.98001		0.306548	0.991344		-0.17355	0.980047		-0.807693	0.947538		0.955348	0.966523		0.132154	0.975121		-0.269837	0.992922		-0.970331	0.972347		1.96216	0.91548
-0.0750953	0.985398		0.642701	0.956263		0.277811	0.985851		-1.20651	0.930136		-0.404449	0.985753		-0.118728	0.989241		0.660948	0.946046		1.87881	0.879478		-0.204556	0.982578		0.202354	0.981682		-0.453516	0.963772		-0.953958	0.936679		1.52135	0.951065		0.150282	0.984756		-0.195055	0.989391		-0.548895	0.969303		2.01401	0.88126
-0.242455	0.981386		0.194042	0.983784		-0.933214	0.927442		-1.24955	0.918579		-0.395193	0.981936		-0.494278	0.965069		0.538276	0.957001		0.232537	0.855169		-0.704053	0.96237		0.228245	0.986269		0.205443	0.979179		-1.19699	0.907018		1.32627	0.941495		0.249364	0.938945		0.170219	0.98319		-0.791916	0.963281		1.25193	0.958733
-0.0727017	0.982231		-0.0796615	0.984001		0.734315	0.974945		-1.29194	0.918472		1.62764	0.906316		-0.306774	0.984574		0.100416	0.980452		0.0997518	0.79873		-0.13341	0.965198		0.345013	0.983488		0.0972396	0.989233		-0.518318	0.950157		-0.193916	0.962531		0.302496	0.921268		-0.374865	0.987332		-1.04496	0.953219		0.602888	0.980172
-0.292202	0.96979		0.279434	0.933768		-0.316737	0.966632		-1.01271	0.941735		0.174771	0.97919		-0.525095	0.968838		0.215193	0.978796		0.00963988	0.780097		-0.321301	0.963672		0.222397	0.974615		-0.274157	0.963799		-1.09044	0.91528		-0.207782	0.975815		-0.0941408	0.978422		-0.221541	0.986076		-0.846454	0.958482		-0.305671	0.981146
-0.284896	0.981007		0.964076	0.828496		-1.15135	0.866916		-1.27676	0.92765		1.0623	0.931453		-0.721308	0.932868		-0.196727	0.978732		-0.224256	0.761836		-0.681107	0.960695		0.026068	0.968375		-0.298875	0.976835		-1.34031	0.881167		-0.149458	0.967047		0.058065	0.978073		-0.464195	0.98621		-1.07763	0.956512		-0.509264	0.977617
0.0551243	0.977877		0.443207	0.850186		-0.0276297	0.976119		-1.20639	0.934275		0.653209	0.958585		-0.256547	0.918694		-0.287738	0.964951		-0.243001	0.757504		-0.553166	0.956339		-0.243104	0.9664		0.506726	0.960475		-1.08453	0.914694		-0.489358	0.934073		0.105204	0.967768		-0.279376	0.983165		-0.999145	0.942249		0.172915	0.965825
-0.150618	0.975255		0.751708	0.859126		0.462691	0.975975		-0.691738	0.952189		1.33179	0.931081		-0.473866	0.926912		0.0199571	0.984136		-0.0469372	0.749101		-1.07441	0.938078		-0.321002	0.960563		0.140122	0.9816		-1.99332	0.858983		0.00374064	0.968934		0.0482758	0.973335		-0.08486	0.982513		1.5922	0.885039		-0.525772	0.95915
-0.129671	0.972275		0.161118	0.906474		0.256037	0.977551		-1.07303	0.937824		0.309782	0.968602		-0.58536	0.952023		-0.519356	0.912651		0.1438	0.747174		0.115503	0.956892		-0.0390932	0.957595		-0.0224213	0.982795		-1.11243	0.904981		-0.0892488	0.964074		0.0940298	0.97612		-0.14983	0.98366		1.18198	0.890692		0.682892	0.952016
-0.274912	0.970584		0.391936	0.892153		-0.0141022	0.975679		-1.10787	0.922833		-0.409982	0.975075		-0.629299	0.973388		-0.229641	0.973415		-0.0152202	0.748838		-0.428319	0.960713		-0.479841	0.956999		-0.189845	0.96893		-1.55072	0.900803		0.149386	0.963575		-0.0194864	0.944664		-0.121863	0.98161		0.998016	0.900042		0.450442	0.961717
-0.0213856	0.970653		-0.321125	0.892111		-0.661248	0.945785		-1.20862	0.91485		-0.0276939	0.94815		-0.254885	0.976988		-0.265639	0.965683		0.055681	0.744001		-0.344704	0.951966		-0.424736	0.964841		0.293463	0.980902		-1.35628	0.905074		0.171622	0.948118		0.355729	0.828009		0.0686957	0.980234		-0.498455	0.965121		0.199316	0.961509
-0.0888339	0.972445		1.25222	0.803308		-1.42481	0.851221		-1.18102	0.927686		0.0548164	0.967981		-0.387253	0.970081		0.527577	0.94284		0.910842	0.72114		-0.308903	0.95041		-0.193508	0.957291		0.107436	0.979238		0.586821	0.94793		0.265746	0.955995		0.170851	0.960995		-0.14431	0.978217		-0.412646	0.943925		1.19841	0.938214
-0.156969	0.970404		0.532298	0.866396		-0.637823	0.949081		-0.109391	0.942353		0.0123809	0.974437		-0.946762	0.945886		0.180916	0.964793		0.186168	0.749861		-0.561574	0.941728		-0.170591	0.954751		0.170087	0.976116		-0.807071	0.944625		1.63773	0.923194		0.00341154	0.969004		0.0227304	0.975055		-0.754014	0.958881		1.3007	0.933609
-0.129007	0.971282		0.959421	0.852587		0.691824	0.968819		-0.918069	0.928094		-0.496634	0.975823		-0.793003	0.926957		-0.226522	0.96947		0.418651	0.783133		-0.535481	0.949043		-0.0370938	0.960949		-0.357706	0.930292		-0.84274	0.93311		0.0680749	0.946666		0.399927	0.954795		0.274914	0.975239		0.153644	0.922626		1.09301	0.933595
-0.291975	0.966998		1.2083	0.782366		-0.446051	0.956313		-0.844431	0.937713		-0.514945	0.974575		-0.740118	0.924116		-0.0204347	0.978531		0.606156	0.823307		-0.666142	0.952662		0.464656	0.952137		0.37975	0.969404		-1.1685	0.902181		-0.346953	0.946792			0.974234		0.045085	0.976222		-1.0514	0.935874		1.27276	0.902466
-0.283352	0.96889		0.687983	0.838641		-0.429539	0.969511		-1.17906	0.913504		-0.217118	0.974848		-1.17178	0.894247		-0.350284	0.954974		1.21273	0.855128		0.00123551	0.954602		0.170138	0.948161		0.19386	0.974294		-1.49106	0.871532		-0.43095	0.951056		-0.0971344	0.960347		-0.106685	0.970988		-1.12049	0.936635		1.39851	0.894438
-0.503171	0.965725		0.257124	0.894925		0.123993	0.974109		-1.10302	0.91276		-0.504296	0.972944		-0.206841	0.920522		-0.304393	0.938662		0.344077	0.856913		-0.386283	0.954736		-0.248488	0.937798		0.336623	0.967744		-2.15795	0.830329		-0.0958002	0.956297		0.394033	0.97432		0.128045	0.968106		-1.26016	0.925859		1.42928	0.899208
-0.472473	0.95726		0.248247	0.887455		-0.290905	0.965199		-0.931565	0.92894		0.575289	0.938453		0.03196	0.920445		0.217646	0.948809		-0.223746	0.800714		-0.289611	0.938896		-0.834544	0.941598		-0.283533	0.932258		-0.507003	0.922303		0.899697	0.932352			0.96798		-0.111824	0.970391		0.00913998	0.897686		1.29841	0.899171
-0.225205	0.965623		-0.151178	0.94771		-1.4207	0.838394		-1.15768	0.917721		0.502417	0.937332		-0.403832	0.932327		-0.235085	0.953151		-0.191758	0.771041		-0.839068	0.942657		-0.941459	0.93617		0.241724	0.965781		0.922661	0.951787		0.398343	0.953773		0.00032918	0.952178		0.0893625	0.967788		-0.467443	0.946291		1.10628	0.933686
-0.181525	0.964338		0.436574	0.930172		-1.48084	0.831811		-1.29421	0.907828		0.528663	0.922221		-0.599969	0.927539		-0.844091	0.901276		0.147496	0.760105		-0.873247	0.938581		-0.709062	0.931775		-0.0148173	0.9635		-0.775797	0.959203		-0.402392	0.933411		0.524187	0.89362		0.313617	0.967588		-1.25288	0.916076		1.51817	0.88795
-0.384191	0.949969		1.68605	0.830138		-1.491	0.828803		-1.25184	0.905442		1.62951	0.899713		-0.65442	0.912766		0.367659	0.932685		-0.290728	0.787437		-0.944628	0.941194		-1.00012	0.915412		0.0486782	0.966126		-0.881261	0.946392		-0.375458	0.939613		-0.437489	0.964874		-0.0858971	0.962368		-1.2971	0.926709		1.13025	0.894415
2.77907	0.84155		3.24701	0.78356		-1.40499	0.831609		-1.13148	0.907031		0.0513943	0.95507		-0.408851	0.941325		-0.120386	0.959329		1.56507	0.79875		-0.455784	0.941926		-0.535006	0.912856		0.239207	0.964509		-0.88201	0.926786		-0.206211	0.942721		0.981553	0.955749		-0.062234	0.964016		-0.0996662	0.90352		0.866867	0.883211
2.5967	0.819091		2.94362	0.798499		-1.36392	0.846681		-1.20871	0.900007		1.16374	0.907148		0.0923485	0.912515		-0.516503	0.906563		0.09288	0.912187		-0.457741	0.936703		-0.236742	0.919097		-0.443648	0.932941		-1.12121	0.893391		-0.538216	0.90267		0.363612	0.944701		0.125922	0.960595		-1.15567	0.922449		0.66293	0.913226
1.63015	0.855442		2.23149	0.801567		-1.42015	0.822176		-0.701993	0.921357		0.00622162	0.935583		-0.419616	0.878171		0.660448	0.9133		0.178246	0.917554		-0.750634	0.932397		-0.0997214	0.921239		0.641404	0.940151		-0.94108	0.90554		0.0216087	0.939279		0.777389	0.95822		0.188131	0.962086		-1.07726	0.912114		1.07456	0.877434
2.184	0.756079		2.32577	0.680872		1.23305	0.831422		0.975809	0.759197		-0.205796	0.826418		1.29963	0.820981		2.50883	0.689016		0.812881	0.60777		0.539118	0.795178		1.21051	0.796199		2.5516	0.728786		-0.904648	0.828039		3.28518	0.713019		2.78729	0.695274		1.03927	0.736036		-0.0796666	0.776544		1.90883	0.756816
1.87092	0.760805		3.36345	0.670503		1.46757	0.83113		1.54778	0.764552		-0.100126	0.813457		1.12264	0.825419		2.24251	0.682589		2.87974	0.553662		-0.845366	0.811286		1.3998	0.823719		2.46685	0.73117		-1.29496	0.799216		1.49605	0.729552		2.86157	0.695945		1.05143	0.734688		1.5092	0.740031		2.09648	0.731204
1.00222	0.790752		3.10747	0.665688		0.869003	0.832159		1.16519	0.769773		1.16883	0.787319		0.667257	0.829641		1.97316	0.681464		0.924435	0.616425		-1.77805	0.765512		1.48811	0.818424		2.39586	0.735674		-1.70747	0.741657		1.17044	0.746691		2.63838	0.71784		1.3251	0.729225		1.17814	0.759169		2.11664	0.727696
1.01207	0.799034		2.15993	0.679903		-0.155084	0.756188		0.388564	0.809731		0.57245	0.806179		0.539594	0.818855		1.78531	0.675774		0.581441	0.616005		-1.13005	0.801532		1.66912	0.814106		2.37057	0.750197		-1.23637	0.796155		0.58842	0.750146		2.56848	0.703113		1.74179	0.727862		1.16756	0.75485		2.09092	0.705393
1.35145	0.792347		0.995292	0.71236		-0.718373	0.705918		0.537202	0.792317		0.94311	0.812638		0.747002	0.830074		1.85983	0.673247		1.22559	0.595913		0.728392	0.814558		1.78668	0.807055		2.40005	0.757001		-1.50915	0.769761		0.677349	0.741579		1.84505	0.713758		1.62986	0.715527		1.03751	0.747228		2.16081	0.729949
1.03613	0.794241		0.971527	0.702668		-0.807293	0.701567		0.522044	0.789552		-0.460966	0.847484		-0.0274065	0.800636		1.8684	0.67541		1.92564	0.58919		2.0926	0.817049		1.4732	0.801825		1.88965	0.778002		-1.83404	0.739909		0.347357	0.774592		2.95614	0.726074		0.934789	0.733625		0.738895	0.762361		2.13251	0.735051
0.983651	0.802803		1.28548	0.702694		-0.919337	0.695125		1.45509	0.741825		0.0262634	0.819829		0.840841	0.800751		1.80569	0.672108		1.83377	0.594004		1.80848	0.816529		1.59073	0.812909		2.37854	0.756617		-1.07678	0.804836		0.550577	0.768922		2.8851	0.715646		0.52616	0.731787		0.810069	0.757968		2.13086	0.716535
0.915901	0.795269		1.00913	0.715843		-0.789137	0.700599		1.19848	0.741148		0.608001	0.812442		0.187193	0.764594		1.8258	0.676286		2.45887	0.58281		1.11989	0.812372		1.8122	0.81508		1.54588	0.780371		-1.48088	0.733695		1.3021	0.756558		1.74313	0.659441		0.834864	0.736126		0.783624	0.760059		1.39593	0.792771
1.7566	0.77658		1.08217	0.723681		-0.461986	0.781499		0.930807	0.749085		1.10521	0.773256		-0.119722	0.813088		1.81971	0.667658		0.861639	0.594909		0.81669	0.814621		1.86447	0.809722		2.32562	0.738876		-2.40526	0.696003		1.30827	0.749374		2.01335	0.698719		1.37678	0.726166		0.410869	0.798566		1.54085	0.771445
1.64605	0.76627		0.93926	0.731869		1.47958	0.834179		0.863708	0.747047		-0.0778536	0.831592		-0.951236	0.791597		1.85601	0.670198		0.794569	0.60073		0.385719	0.819722		1.57879	0.80075		1.44515	0.778675		-1.14199	0.77532		0.292172	0.751599		1.26701	0.682315		1.3008	0.693949		0.828782	0.754072		2.01908	0.721521
1.05528	0.795464		0.949204	0.729281		0.645877	0.827214		0.86045	0.745821		0.157971	0.809538		-1.27732	0.788236		1.83251	0.679925		1.53404	0.577587		0.135949	0.825614		1.62115	0.80641		1.79317	0.773217		-1.35828	0.760074		0.510878	0.756257		1.06583	0.695814		0.986754	0.697738		0.93513	0.757075		2.32131	0.719424
0.870088	0.802561		1.89055	0.689653		-0.836389	0.69323		0.865784	0.740772		1.84087	0.760813		-0.151877	0.817252		1.58519	0.67266		2.18322	0.590461		0.779659	0.827111		1.39537	0.793934		1.83076	0.768519		-1.47394	0.772087		0.191998	0.743122		0.98481	0.693088		1.27055	0.697455		1.02825	0.750404		3.0614	0.717272
1.03591	0.796761		2.45958	0.657021		-0.483094	0.748828		0.843237	0.742934		0.0464787	0.820567		-0.107403	0.807559		1.62537	0.665049		0.605909	0.612548		0.700098	0.815459		1.43763	0.795032		1.68209	0.784346		-2.2577	0.677465		0.55424	0.742118		1.7622	0.716724		1.56935	0.69985		1.04784	0.74457		2.96324	0.676708
1.04334	0.792176		1.10014	0.688563		-0.538305	0.734365		0.765219	0.740079		-0.0554545	0.834446		-0.858701	0.779879		1.64047	0.661045		0.480719	0.627134		0.882485	0.825808		1.12219	0.797843		1.61224	0.780485		-2.18901	0.699666		0.430264	0.735049		2.27287	0.705627		1.47277	0.699104		1.01093	0.752978		2.46086	0.693459
1.13838	0.792375		0.799069	0.721493		-0.679927	0.708529		0.786975	0.743295		1.02654	0.757228		-0.222158	0.819665		1.68963	0.666108		1.83887	0.555554		1.01713	0.828096		1.16061	0.788698		2.16021	0.764474		-1.10046	0.782815		0.055509	0.722543		1.68574	0.706111		1.54892	0.695973		1.1946	0.755105		2.31652	0.70293
1.18821	0.783788		0.858327	0.721452		-0.721687	0.708417		0.713064	0.739575		1.28274	0.792894		-0.23412	0.820942		1.67589	0.6679		2.18546	0.572956		0.796428	0.820876		1.20782	0.784345		2.06736	0.779233		0.0499757	0.80141		0.784612	0.727855		1.91625	0.707634		1.6193	0.688101		1.21449	0.743761		1.73349	0.705498
1.0107	0.801161		0.997049	0.732835		-0.811395	0.727053		0.805627	0.734759		-0.0352798	0.818005		0.0378333	0.830513		1.77369	0.67092		0.478254	0.606508		0.987069	0.81577		2.54914	0.777566		1.3956	0.789679		-0.316134	0.853992		0.568859	0.724592		2.2145	0.692803		1.17359	0.683129		1.05143	0.752608		0.570025	0.781259
1.14926	0.799757		0.944461	0.725884		1.71128	0.840971		0.617809	0.728384		0.067835	0.815177		-0.721461	0.801291		1.60631	0.669845		1.2476	0.563543		0.663646	0.805197		2.73431	0.784753		1.07282	0.798995		-0.934487	0.82933		0.871362	0.728027		2.32201	0.691809		0.374593	0.670054		1.03214	0.753539		1.38492	0.728436
1.53338	0.793296		0.921539	0.720083		1.53932	0.837029		0.610837	0.73055		1.26624	0.74856		0.0973399	0.819138		1.582	0.660651		2.44842	0.559568		0.789746	0.81003		2.33858	0.793723		1.39442	0.798635		-1.35742	0.783428		1.80468	0.726262		2.3365	0.704835		1.11327	0.686631		0.855554	0.750378		1.27959	0.74261
1.75412	0.760519		1.9735	0.673663		0.684377	0.837647		0.587826	0.730467		1.60865	0.755012		0.144279	0.8106		1.52861	0.676045		1.85077	0.562821		0.873004	0.810468		1.65725	0.779285		1.27311	0.784105		-0.947459	0.828653		0.431121	0.732756		1.27563	0.658079		1.29855	0.692838		0.88259	0.757802		0.811988	0.748458
2.96783	0.696682		3.04252	0.626051		0.297556	0.823571		0.681446	0.727096		1.20845	0.790964		-1.16124	0.738224		1.41939	0.661111		0.54855	0.593934		1.13382	0.810019		1.13751	0.779083		1.08523	0.795452		-1.18137	0.790948		0.11788	0.730729		2.19625	0.691376		0.987459	0.673655		0.891306	0.758582		0.960097	0.729085
2.66389	0.71308		2.7178	0.607562		0.0290879	0.811459		0.575575	0.731747		1.57516	0.758547		0.43637	0.820748		1.51678	0.664072		0.49549	0.599718		1.05277	0.812725		0.804534	0.793407		0.933285	0.804086		-1.60068	0.744637		0.217503	0.730663		1.74986	0.677358		0.53618	0.651579		0.925523	0.758088		1.44668	0.734743
1.28402	0.764594		1.62751	0.657987		-0.67914	0.714544		0.660247	0.740392		0.520309	0.812969		-0.937481	0.734784		1.99619	0.681886		0.954624	0.57337		0.838547	0.815922		0.875334	0.789762		1.00447	0.792752		-2.42086	0.684044		0.922228	0.737423		1.48444	0.684113		-0.0811598	0.647158		0.929289	0.756772		1.2822	0.752511
0.83995	0.79165		1.02531	0.697089		-0.432263	0.735002		0.515687	0.730797		1.11834	0.777406		-1.50703	0.733573		2.32131	0.686564		1.57265	0.567931		1.16881	0.815117		0.913947	0.783141		0.744694	0.792313		-1.22692	0.766942		0.425339	0.745039		1.26494	0.645574		-1.79885	0.529368		0.85481	0.754654		0.934908	0.765586
0.790698	0.794826		0.89146	0.700329		1.41628	0.832478		0.499471	0.730967		3.07721	0.697832		-2.86961	0.708666		2.12664	0.684782		0.69574	0.586582		1.18617	0.815575		1.03747	0.786646		0.916885	0.785859		-1.68428	0.725231		0.0599062	0.722918		1.36972	0.671093		-0.0696907	0.615066		0.776167	0.754758		1.39934	0.722942
0.738389	0.801323		0.944934	0.699965		1.69346	0.835818		0.493312	0.730631		1.62161	0.771683		-2.09359	0.797643		1.72872	0.682059		1.78709	0.550021		0.842898	0.804104		1.13474	0.779528		1.42145	0.780083		-1.87395	0.675087		-0.00233736	0.722337		1.12192	0.688767		0.107906	0.677829		0.740961	0.760657		1.17866	0.757024
0.849203	0.806139		1.31494	0.690579		0.37908	0.806661		0.478291	0.732713		0.0470397	0.814703		0.537264	0.812519		1.63522	0.668145		2.16078	0.561802		1.06103	0.811257		1.05388	0.775755		2.15279	0.776252		-1.30624	0.75283		0.0392418	0.717447		0.857158	0.692192		0.293779	0.682158		0.776481	0.762027		1.79334	0.71128
1.92335	0.763752		0.96622	0.719035		-0.520721	0.717959		0.536893	0.729751		-0.0345785	0.819209		-0.0603663	0.789388		1.75688	0.666111		0.803395	0.586968		1.08306	0.790246		1.41518	0.77152		2.24763	0.763308		-1.65548	0.713403		0.463204	0.734307		0.956539	0.670123		-0.0967235	0.676673		0.826864	0.755947		1.48495	0.740869
1.39331	0.769466		1.74855	0.679774		-0.818562	0.691215		0.564261	0.729917		0.270806	0.819891		-0.537588	0.794701		1.82722	0.667575		0.354323	0.595707		1.04232	0.785293		-0.0790227	0.778935		2.09224	0.769211		-2.20325	0.708105		2.02637	0.69541		0.782243	0.661219		0.0359043	0.666649		1.00652	0.756456		1.44929	0.714693
0.86692	0.793598		1.64102	0.636517		-0.560445	0.70886		0.421888	0.726837		0.136877	0.819287		-1.04589	0.792739		1.8132	0.663538		0.873959	0.571278		1.21397	0.80179		0.0331853	0.779949		2.11241	0.765792		-1.09693	0.789739		1.75771	0.720908		0.799839	0.673036		-0.226007	0.693971		0.976473	0.755243		1.37188	0.747897
0.673121	0.961734		0.538594	0.95734		0.653175	0.969338		1.35064	0.817127		-0.795441	0.960159		0.355544	0.885663		0.753117	0.891281		1.1262	0.958963		1.08314	0.944191		0.907948	0.952937		0.0698491	0.987657		0.269903	0.964945		-0.443442	0.976796		0.214141	0.966461		0.133475	0.976267		1.50446	0.897278		-0.368423	0.97885
0.307072	0.980545		0.557763	0.946438		0.0698629	0.980485		1.56456	0.857193		0.280854	0.982414		0.872575	0.957714		0.605345	0.895274		0.72705	0.970984		0.966313	0.969998		0.350226	0.978766		-0.0620282	0.986288		1.90944	0.928111		-0.444751	0.977834		0.207377	0.963932		0.108807	0.988854		2.50901	0.892004		0.236961	0.975123
-0.0126161	0.98304		0.204013	0.978791		-0.875307	0.930168		1.30996	0.897495		-0.737751	0.959455		0.688676	0.979833		0.43259	0.952434		0.259128	0.965825		0.620836	0.975187		0.575154	0.985846		0.0937051	0.989335		0.413091	0.983982		-0.241553	0.975131		0.530036	0.86363		0.0106231	0.990199		2.43074	0.898975		0.0972907	0.982209
-0.10882	0.981654		0.211207	0.989076		-0.10207	0.989284		1.38127	0.868538		-0.899406	0.950878		-0.316533	0.976923		0.439704	0.964088		0.253126	0.970768		0.146779	0.982332		0.206124	0.99004		-0.0562012	0.991434		1.81071	0.916589		-0.351758	0.975047		0.264997	0.872415		0.139318	0.99286		2.14166	0.919039		-0.745868	0.939916
0.0432546	0.992251		-0.100816	0.984514		-0.295254	0.990698		0.859216	0.952455		-1.02793	0.927015		0.640044	0.979524		0.528078	0.936871		0.153875	0.983711		-0.126972	0.991645		-0.0906666	0.990075		-0.227669	0.988173		0.867927	0.978369		-0.272201	0.990192		-0.0377402	0.991387		0.238879	0.996068		0.793989	0.984696		-2.02816	0.900403
0			0			0			0			0			0			0			0			0			0			0			0			0			0			0			0			0
0.200211	0.992871		0.483916	0.969904		-0.782726	0.964799		-0.300266	0.984886		-0.697746	0.957352		0.651132	0.977731		0.509904	0.928729		0.452387	0.975555		-0.225849	0.981944		0.215882	0.992025		-0.401219	0.974126		0.0602333	0.982787		0.683147	0.967191		0.0944133	0.973939		-0.0309578	0.995351		-0.176342	0.987189		-0.0659941	0.987778
-0.0318407	0.989638		0.541885	0.972214		-0.0174431	0.986563		-0.347299	0.979719		-1.43237	0.936915		0.521316	0.985527		1.18903	0.831082		2.03268	0.905308		-0.331529	0.986366		0.111687	0.990582		-0.681185	0.954262		-0.0860314	0.974339		1.24915	0.948356		0.112542	0.986361		0.0438243	0.993477		0.245094	0.971545		-0.0141514	0.980014
-0.1992	0.985623		0.0932252	0.988246		-1.22847	0.916026		-0.390338	0.967839		-1.42312	0.908831		0.145766	0.979644		1.06635	0.857474		0.386412	0.902829		-0.831026	0.96865		0.137579	0.991385		-0.0222258	0.980506		-0.329065	0.951373		1.05407	0.945262		0.211624	0.933155		0.409098	0.988711		0.00207287	0.971671		-0.776231	0.954286
-0.0294471	0.985263		-0.180478	0.973065		0.439061	0.982908		-0.432721	0.962983		0.599712	0.980561		0.33327	0.970258		0.628494	0.906033		0.253627	0.858958		-0.260382	0.972619		0.254347	0.987704		-0.130429	0.989099		0.349608	0.979582		-0.466117	0.965156		0.264755	0.915109		-0.135986	0.990776		-0.250975	0.964263		-1.42527	0.92518
-0.248947	0.975395		0.178618	0.949758		-0.611991	0.964129		-0.153495	0.968834		-0.853154	0.937166		0.114949	0.949373		0.74327	0.905148		0.163515	0.844856		-0.448273	0.97173		0.131731	0.974868		-0.501826	0.953277		-0.22251	0.959333		-0.479983	0.974983		-0.131881	0.981165		0.0173379	0.989097		-0.0524655	0.966683		-2.33383	0.888377
-0.241641	0.984723		0.86326	0.857417		-1.44661	0.852937		-0.417544	0.969667		0.034377	0.978921		-0.0812638	0.893047		0.331351	0.965676		-0.070381	0.827839		-0.808079	0.967897		-0.0645987	0.968331		-0.526544	0.970551		-0.472384	0.935222		-0.421659	0.967397		0.0203248	0.984199		-0.225316	0.988931		-0.283643	0.964369		-2.53742	0.882347
0.0983789	0.981254		0.34239	0.873631		-0.322884	0.973962		-0.347176	0.964683		-0.374716	0.966073		0.383497	0.869793		0.24034	0.982962		-0.0891263	0.829334		-0.680138	0.965527		-0.333771	0.965826		0.279058	0.970029		-0.216605	0.958926		-0.761559	0.931792		0.0674637	0.973184		-0.0404967	0.98586		-0.205156	0.95128		-1.85524	0.884657
-0.107364	0.979694		0.650891	0.885005		0.167437	0.980963		0.167478	0.952681		0.303865	0.971815		0.166179	0.881828		0.548035	0.924226		0.106938	0.822201		-1.20138	0.947773		-0.411669	0.963962		-0.0875467	0.980403		-1.12539	0.904806		-0.26846	0.970377		0.0105356	0.980676		0.154019	0.984784		2.38619	0.86546		-2.55393	0.871459
-0.0864162	0.978261		0.0603011	0.901857		-0.0392169	0.980238		-0.213818	0.9635		-0.718143	0.943896		0.0546836	0.919568		0.0087215	0.987828		0.297675	0.820601		-0.0114694	0.964124		-0.12976	0.964087		-0.25009	0.978556		-0.244506	0.951339		-0.36145	0.967671		0.0562896	0.982181		0.0890496	0.985061		1.97597	0.872533		-1.34527	0.920331
-0.231657	0.976103		0.291119	0.901504		-0.309356	0.973546		-0.248653	0.960732		-1.43791	0.909117		0.0107448	0.958072		0.298437	0.960763		0.138655	0.822099		-0.555292	0.968797		-0.570508	0.956614		-0.417514	0.961695		-0.682795	0.943537		-0.122815	0.968965		-0.0572266	0.94994		0.117016	0.983941		1.79201	0.886105		-1.57772	0.91087
0.021869	0.973474		-0.421941	0.881187		-0.956502	0.940126		-0.349402	0.957825		-1.05562	0.966154		0.385159	0.964425		0.262439	0.97031		0.209556	0.813711		-0.471677	0.962393		-0.515402	0.970818		0.0657943	0.982194		-0.488357	0.948945		-0.100579	0.952254		0.317989	0.813512		0.307575	0.984031		0.295534	0.958965		-1.82884	0.928603
-0.0455793	0.976552		1.1514	0.837619		-1.72006	0.838975		-0.321801	0.953697		-0.973109	0.940102		0.252791	0.975486		1.05565	0.824557		1.06472	0.78788		-0.435875	0.95912		-0.284174	0.964919		-0.120233	0.975571		1.45475	0.936714		-0.0064551	0.962071		0.133111	0.95811		0.0945687	0.980677		0.381343	0.945879		-0.829754	0.966068
-0.113715	0.977187		0.431481	0.881956		-0.933077	0.941647		0.749825	0.908329		-1.01554	0.932759		-0.306718	0.968088		0.708994	0.881742		0.340044	0.816626		-0.688546	0.951838		-0.261258	0.964115		-0.0575822	0.965861		0.0608555	0.971918		1.36553	0.923572		-0.0343287	0.974092		0.26161	0.977069		0.0399746	0.956843		-0.727454	0.95913
-0.0857519	0.973792		0.858604	0.879066		0.39657	0.975636		-0.058853	0.946193		-1.52456	0.905424		-0.152959	0.949551		0.301556	0.962317		0.572526	0.843437		-0.662453	0.957682		-0.12776	0.964319		-0.585375	0.917423		0.0251866	0.967565		-0.204126	0.953022		0.362187	0.954959		0.513793	0.976923		0.947633	0.915752		-0.935148	0.954634
-0.248721	0.971809		1.10748	0.817767		-0.741305	0.950415		0.014785	0.949857		-1.54287	0.908917		-0.100074	0.939701		0.507643	0.933359		0.760032	0.86679		-0.793115	0.959492		0.373989	0.961041		0.152082	0.968208		-0.300575	0.944388		-0.619154	0.950976			0.977248		0.283964	0.977939		-0.257407	0.948052		-0.755398	0.958277
-0.240097	0.970004		0.587166	0.862418		-0.724793	0.964175		-0.319841	0.953086		-1.24504	0.91453		-0.531733	0.920147		0.177794	0.978622		1.3666	0.893415		-0.125737	0.963806		0.0794711	0.948253		-0.0338084	0.969098		-0.623134	0.922615		-0.703151	0.953658		-0.134875	0.964343		0.132194	0.973412		-0.326503	0.94813		-0.629651	0.954503
-0.459916	0.96808		0.156307	0.897276		-0.171261	0.977179		-0.243806	0.949826		-1.53222	0.902662		0.433203	0.932196		0.223685	0.981604		0.497952	0.901174		-0.513255	0.960329		-0.339155	0.938219		0.108954	0.966842		-1.29003	0.87613		-0.368001	0.96055		0.356292	0.977553		0.366924	0.97029		-0.466172	0.939923		-0.598875	0.949426
-0.429218	0.96138		0.147431	0.896847		-0.586159	0.964569		-0.0723487	0.946553		-0.452636	0.973018		0.672004	0.92803		0.745724	0.843189		-0.0698707	0.855038		-0.416583	0.944857		-0.925211	0.944676		-0.511202	0.918744		0.360924	0.938742		0.627495	0.9316			0.975281		0.127055	0.972333		0.803129	0.894713		-0.729752	0.944232
-0.181951	0.964235		-0.251994	0.9277		-1.71596	0.822758		-0.298461	0.951338		-0.525508	0.957912		0.236212	0.939034		0.292993	0.959963		-0.0378832	0.836004		-0.96604	0.950359		-1.03213	0.933464		0.0140549	0.959361		1.79059	0.919165		0.126142	0.958142		-0.037411	0.954182		0.328242	0.970378		0.326546	0.941261		-0.92188	0.931049
-0.13827	0.959693		0.335757	0.944854		-1.7761	0.815602		-0.434989	0.945991		-0.499263	0.973204		0.0400754	0.942886		-0.316013	0.972377		0.301371	0.822214		-1.00022	0.947641		-0.799729	0.930794		-0.242486	0.956584		0.0921296	0.971814		-0.674593	0.935691		0.486447	0.885986		0.552496	0.971704		-0.458896	0.931699		-0.509988	0.947166
-0.340936	0.949453		1.58523	0.860265		-1.78625	0.814416		-0.392622	0.943961		0.60158	0.966015		-0.0143758	0.922336		0.895737	0.812		-0.136852	0.84332		-1.0716	0.950353		-1.09079	0.915381		-0.178991	0.962761		-0.0133341	0.972467		-0.647659	0.942268		-0.475229	0.970461		0.152982	0.965226		-0.50311	0.93776		-0.897907	0.937509
2.82233	0.832341		3.1462	0.804661		-1.70024	0.817159		-0.272267	0.941091		-0.976531	0.941638		0.231193	0.91975		0.407692	0.950719		1.71894	0.84542		-0.582756	0.949421		-0.625672	0.918392		0.0115379	0.962217		-0.0140839	0.963278		-0.478412	0.947322		0.943813	0.95626		0.176645	0.96721		0.694323	0.895817		-1.16129	0.934501
2.63995	0.810756		2.8428	0.815296		-1.65917	0.834922		-0.349494	0.935593		0.135816	0.968663		0.732393	0.873065		0.0115745	0.973674		0.246755	0.937812		-0.584713	0.945158		-0.327409	0.925204		-0.671317	0.923682		-0.253286	0.937121		-0.810417	0.902416		0.325872	0.939924		0.364801	0.964037		-0.361679	0.933407		-1.36523	0.93201
1.67341	0.847269		2.13067	0.823985		-1.7154	0.807019		0.157223	0.905		-1.0217	0.948421		0.220428	0.837286		1.18853	0.799929		0.332121	0.935248		-0.877606	0.940598		-0.190388	0.92589		0.413736	0.93924		-0.0731535	0.948127		-0.250592	0.942657		0.739648	0.964472		0.42701	0.965135		-0.283276	0.926689		-0.953602	0.939747
2.22725	0.754865		2.22496	0.698113		0.9378	0.831646		1.83503	0.686349		-1.23372	0.838735		1.93967	0.780639		3.0369	0.68699		0.966756	0.666877		0.412146	0.805013		1.11985	0.810852		2.32393	0.729879		-0.0367214	0.846856		3.01298	0.702899		2.74955	0.676896		1.27814	0.738083		0.714322	0.757417		-0.119331	0.837159
1.91418	0.758241		3.26263	0.680902		1.17232	0.832911		2.407	0.673968		-1.12805	0.862966		1.76268	0.780952		2.77058	0.680644		3.03361	0.604873		-0.972338	0.821983		1.30913	0.835364		2.23918	0.731692		-0.427032	0.830959		1.22385	0.735527		2.82383	0.678629		1.29031	0.736661		2.30319	0.709265		0.068325	0.841743
1.04547	0.786561		3.00665	0.679998		0.573749	0.832132		2.02441	0.685894		0.1409	0.869588		1.3073	0.78997		2.50124	0.678736		1.07831	0.673905		-1.90503	0.777905		1.39744	0.830255		2.16819	0.737148		-0.839546	0.784044		0.898239	0.748003		2.60064	0.701916		1.56398	0.731886		1.97213	0.729583		0.0884811	0.837665
1.05532	0.794324		2.05911	0.702027		-0.450338	0.749934		1.24778	0.769047		-0.455476	0.867792		1.17964	0.782036		2.31339	0.674634		0.735316	0.677037		-1.25703	0.813054		1.57845	0.82011		2.1429	0.753918		-0.368443	0.83304		0.316219	0.754682		2.53074	0.682902		1.98067	0.730585		1.96155	0.726751		0.062759	0.818764
1.39471	0.787523		0.894476	0.727973		-1.01363	0.697219		1.39642	0.745501		-0.084815	0.858959		1.38705	0.807963		2.38791	0.669912		1.37946	0.653977		0.60142	0.824657		1.69601	0.819949		2.17238	0.762914		-0.641223	0.808127		0.405148	0.746916		1.80731	0.694704		1.86874	0.717623		1.8315	0.716777		0.132647	0.836877
1.07939	0.789342		0.87071	0.723775		-1.10255	0.693331		1.38126	0.743957		-1.48889	0.821076		0.612638	0.795845		2.39647	0.672629		2.07952	0.647382		1.96562	0.827914		1.38253	0.817677		1.66198	0.78554		-0.966117	0.782095		0.0751556	0.781444		2.9184	0.707678		1.17367	0.735634		1.53288	0.73418		0.104352	0.835839
1.02691	0.79832		1.18467	0.724949		-1.21459	0.68582		2.31431	0.65472		-1.00166	0.872841		1.48089	0.752467		2.33377	0.671768		1.98764	0.649348		1.68151	0.825505		1.50006	0.825198		2.15088	0.765082		-0.208855	0.837547		0.278376	0.771885		2.84736	0.696142		0.765039	0.734125		1.60406	0.725416		0.102697	0.830351
0.959156	0.790026		0.908311	0.734534		-1.08439	0.69314		2.05769	0.660627		-0.419924	0.857332		0.827237	0.759958		2.35388	0.676487		2.61275	0.638815		0.992921	0.821687		1.72153	0.821175		1.31821	0.788397		-0.612957	0.777676		1.0299	0.763418		1.70539	0.640335		1.07374	0.738437		1.57761	0.726509		-0.632227	0.802185
1.79985	0.77213		0.981354	0.740531		-0.75724	0.77497		1.79002	0.669205		0.0772894	0.862112		0.520322	0.792261		2.34779	0.667976		1.01551	0.654714		0.689717	0.823617		1.7738	0.817037		2.09795	0.739684		-1.53734	0.734796		1.03607	0.753253		1.97561	0.678001		1.61566	0.728066		1.20486	0.765711		-0.487309	0.820478
1.68931	0.75886		0.838443	0.746283		1.18433	0.835921		1.72292	0.663012		-1.10578	0.830812		-0.311192	0.781653		2.38409	0.667554		0.948444	0.660178		0.258747	0.828018		1.48812	0.815195		1.21748	0.786176		-0.274063	0.813963		0.0199714	0.75606		1.22927	0.663596		1.53968	0.696766		1.62277	0.724891		-0.00907399	0.810066
1.09854	0.790375		0.848388	0.748208		0.350623	0.827131		1.71967	0.664004		-0.869954	0.854959		-0.637275	0.762983		2.36059	0.673097		1.68791	0.634605		0.00897652	0.833289		1.53048	0.821782		1.5655	0.778192		-0.490355	0.803104		0.238677	0.761206		1.02809	0.676922		1.22563	0.698683		1.72912	0.724807		0.293153	0.80962
0.913343	0.798579		1.78973	0.70865		-1.13164	0.684565		1.725	0.662256		0.812946	0.857915		0.488167	0.782343		2.11327	0.667539		2.3371	0.649539		0.652687	0.836791		1.3047	0.806708		1.6031	0.773824		-0.606013	0.807734		-0.0802027	0.749552		0.94707	0.673322		1.50943	0.698517		1.82224	0.718589		1.03325	0.792064
1.07916	0.793069		2.35876	0.680415		-0.778348	0.743751		1.70245	0.664146		-0.981447	0.837161		0.532642	0.776818		2.15345	0.659997		0.759784	0.669851		0.573126	0.823491		1.34697	0.809628		1.45442	0.791503		-1.38977	0.716307		0.282039	0.750898		1.72446	0.694895		1.80823	0.702181		1.84183	0.71498		0.935077	0.780489
1.0866	0.787629		0.999327	0.707536		-0.833559	0.727505		1.62444	0.661813		-1.08338	0.842108		-0.218657	0.783792		2.16855	0.655599		0.634594	0.685365		0.755513	0.834243		1.03152	0.809396		1.38457	0.785017		-1.32108	0.741918		0.158063	0.740652		2.23513	0.68713		1.71165	0.700419		1.80492	0.721626		0.432702	0.787447
1.18164	0.78993		0.698252	0.735196		-0.97518	0.701252		1.64619	0.668289		-0.00138069	0.867984		0.417886	0.807966		2.21771	0.660757		1.99275	0.608812		0.890161	0.836811		1.06994	0.797209		1.93255	0.764636		-0.232534	0.815796		-0.216692	0.726276		1.648	0.686525		1.7878	0.696131		1.98859	0.72199		0.288362	0.785266
1.23146	0.778463		0.75751	0.738439		-1.01694	0.70134		1.57228	0.666801		0.25482	0.843447		0.405924	0.816065		2.20396	0.663373		2.33933	0.630704		0.669456	0.829181		1.11716	0.800736		1.83969	0.782178		0.917902	0.800471		0.512411	0.734417		1.87851	0.687887		1.85817	0.68923		2.00848	0.715899		-0.294673	0.78147
1.05395	0.798664		0.896233	0.74848		-1.10665	0.721045		1.66484	0.667468		-1.06321	0.812705		0.677877	0.817662		2.30177	0.665042		0.632129	0.664579		0.860097	0.825473		2.45848	0.790659		1.16793	0.797787		0.551793	0.84192		0.296658	0.730671		2.17676	0.67011		1.41247	0.684121		1.84542	0.721317		-1.45813	0.743273
1.19251	0.795753		0.843644	0.73961		1.41602	0.845701		1.47703	0.660419		-0.96009	0.827092		-0.0814174	0.810594		2.13439	0.66393		1.40148	0.617559		0.536674	0.815305		2.64364	0.802129		0.845153	0.807151		-0.0665601	0.84563		0.599161	0.729756		2.28427	0.670786		0.613472	0.671022		1.82613	0.721601		-0.643244	0.791345
1.57663	0.789963		0.820722	0.73631		1.24407	0.841458		1.47005	0.658248		0.238312	0.844953		0.737384	0.819485		2.11008	0.656209		2.6023	0.611091		0.662774	0.82036		2.24791	0.806498		1.16675	0.806074		-0.489491	0.819117		1.53248	0.72431		2.29876	0.683321		1.35215	0.68672		1.64954	0.712752		-0.748566	0.769033
1.79737	0.75381		1.87268	0.691025		0.389123	0.83748		1.44704	0.658357		0.580725	0.840124		0.784324	0.814208		2.05669	0.667851		2.00465	0.614849		0.746032	0.820908		1.56659	0.791275		1.04544	0.789246		-0.0795327	0.850445		0.15892	0.741856		1.23789	0.63844		1.53742	0.692624		1.67658	0.722421		-1.21617	0.759106
3.01109	0.688314		2.94171	0.639777		0.0023016	0.821992		1.54066	0.654548		0.180522	0.833161		-0.521201	0.769069		1.94747	0.653478		0.702426	0.65		1.00685	0.820219		1.04684	0.792999		0.85756	0.803651		-0.313444	0.824228		-0.154321	0.739985		2.15851	0.669321		1.22634	0.674618		1.68529	0.72294		-1.06806	0.772141
2.70715	0.7089		2.61698	0.626055		-0.266166	0.809628		1.43479	0.659709		0.547237	0.841739		1.07641	0.806329		2.04486	0.655059		0.649365	0.65638		0.925794	0.822668		0.713867	0.805638		0.705616	0.813903		-0.732754	0.785579		-0.0546979	0.739377		1.71212	0.655952		0.775059	0.651164		1.71951	0.722545		-0.581479	0.784148
1.32727	0.759725		1.52669	0.680586		-0.974394	0.706709		1.51946	0.667415		-0.507617	0.817985		-0.297437	0.766416		2.52427	0.676731		1.1085	0.629424		0.711575	0.823437		0.784668	0.799684		0.776799	0.80194		-1.55293	0.72077		0.650027	0.74512		1.4467	0.664168		0.157719	0.647797		1.72328	0.72296		-0.745957	0.79132
0.883204	0.786352		0.924498	0.71156		-0.727517	0.729293		1.3749	0.660147		0.0904167	0.846794		-0.866985	0.760429		2.84939	0.688646		1.72652	0.623169		1.04184	0.822936		0.823281	0.801282		0.517025	0.800052		-0.358997	0.797513		0.153138	0.754442		1.2272	0.625397		-1.55997	0.533007		1.6488	0.720704		-1.09325	0.783647
0.833953	0.789742		0.790644	0.719386		1.12102	0.836451		1.35869	0.659378		2.04929	0.821215		-2.22957	0.736388		2.65472	0.677336		0.849615	0.643478		1.0592	0.823895		0.946804	0.802548		0.689216	0.793637		-0.816352	0.767645		-0.212295	0.729649		1.33198	0.64976		0.169188	0.617454		1.57016	0.720904		-0.628824	0.79834
0.781643	0.795414		0.844117	0.718935		1.3982	0.843564		1.35253	0.659524		0.593686	0.826369		-1.45354	0.774618		2.2568	0.669752		1.94097	0.602851		0.715925	0.811453		1.04407	0.794445		1.19378	0.786159		-1.00602	0.71132		-0.274538	0.732732		1.08418	0.667755		0.346785	0.678673		1.53495	0.726131		-0.849501	0.782725
0.892457	0.800076		1.21412	0.710076		0.0838264	0.807025		1.33751	0.665587		-0.980886	0.790442		1.17731	0.76352		2.1633	0.657755		2.31466	0.61664		0.934061	0.820305		0.96321	0.795536		1.92512	0.77842		-0.438313	0.792008		-0.232959	0.726341		0.819418	0.673165		0.532658	0.684769		1.57047	0.729796		-0.234814	0.789407
1.9666	0.755965		0.865403	0.732103		-0.815975	0.711886		1.39611	0.65917		-1.0625	0.79381		0.579678	0.743755		2.28496	0.656071		0.95727	0.6425		0.956087	0.799404		1.32451	0.789403		2.01996	0.768186		-0.787554	0.761117		0.191003	0.7429		0.918799	0.649866		0.142156	0.677644		1.62085	0.722478		-0.543206	0.798417
1.43657	0.759898		1.64774	0.696382		-1.11382	0.682532		1.42348	0.657214		-0.75712	0.802293		0.102456	0.757697		2.3553	0.658564		0.508198	0.652982		0.91535	0.793971		-0.169689	0.792331		1.86457	0.779272		-1.33532	0.741753		1.75417	0.694924		0.744503	0.642017		0.274783	0.667613		1.80051	0.723795		-0.578873	0.803946
0.910175	0.787453		1.5402	0.663709		-0.855698	0.700597		1.2811	0.658975		-0.891049	0.797936		-0.405844	0.784342		2.34128	0.655312		1.02783	0.626055		1.087	0.810393		-0.0574813	0.795226		1.88474	0.769546		-0.229	0.814788		1.48551	0.723215		0.762099	0.653007		0.0128718	0.693831		1.77046	0.723366		-0.656279	0.797798
0.47291	0.959423		0.0546778	0.967181		1.4359	0.937285		1.65091	0.802402		-0.0976951	0.967635		-0.295588	0.916351		0.243213	0.963486		0.673817	0.961646		1.30898	0.918301		0.692067	0.953506		0.471068	0.9662		0.209669	0.975346		-1.12659	0.944021		0.119728	0.973657		0.164432	0.972432		1.6808	0.882911		-0.302429	0.974043
0.106861	0.978266		0.0738469	0.978203		0.852589	0.952518		1.86482	0.837013		0.9786	0.951019		0.221443	0.967725		0.0954408	0.968238		0.274663	0.953031		1.19216	0.94571		0.134345	0.978223		0.339191	0.984865		1.8492	0.911964		-1.1279	0.944339		0.112964	0.975789		0.139765	0.986325		2.68535	0.88277		0.302955	0.974222
-0.212827	0.978267		-0.279903	0.972887		-0.0925807	0.972051		1.61022	0.873931		-0.0400052	0.983671		0.0375438	0.982455		-0.0773138	0.969553		-0.193259	0.942563		0.846686	0.952786		0.359272	0.984952		0.494924	0.964022		0.352857	0.966848		-0.9247	0.942413		0.435623	0.917641		0.0415809	0.986529		2.60708	0.890198		0.163285	0.983712
-0.309031	0.975565		-0.272708	0.965942		0.680657	0.968499		1.68154	0.849732		-0.20166	0.985453		-0.967665	0.93983		-0.0702003	0.967085		-0.199261	0.943866		0.372628	0.974279		-0.00975717	0.988538		0.345018	0.984803		1.75048	0.902663		-1.03491	0.933338		0.170584	0.92247		0.170276	0.989455		2.318	0.906844		-0.679874	0.949371
-0.156957	0.989823		-0.584732	0.950734		0.487472	0.96946		1.15948	0.933439		-0.330179	0.98052		-0.011088	0.988081		0.0181737	0.97457		-0.298511	0.958622		0.0988773	0.98001		-0.306548	0.991344		0.17355	0.980047		0.807693	0.947538		-0.955348	0.966523		-0.132154	0.975121		0.269837	0.992922		0.970331	0.972347		-1.96216	0.91548
-0.200211	0.992871		-0.483916	0.969904		0.782726	0.964799		0.300266	0.984886		0.697746	0.957352		-0.651132	0.977731		-0.509904	0.928729		-0.452387	0.975555		0.225849	0.981944		-0.215882	0.992025		0.401219	0.974126		-0.0602333	0.982787		-0.683147	0.967191		-0.0944133	0.973939		0.0309578	0.995351		0.176342	0.987189		0.0659941	0.987778
0			0			0			0			0			0			0			0			0			0			0			0			0			0			0			0			0
-0.232052	0.990632		0.0579689	0.983029		0.765283	0.952617		-0.0470326	0.990553		-0.734629	0.981149		-0.129817	0.990294		0.679122	0.949689		1.5803	0.955976		-0.105679	0.988766		-0.104194	0.989525		-0.279966	0.991442		-0.146265	0.986008		0.566003	0.981182		0.0181286	0.973903		0.0747821	0.995423		0.421436	0.972008		0.0518427	0.986575
-0.399412	0.985245		-0.390691	0.967451		-0.445742	0.970267		-0.0900722	0.981043		-0.725372	0.972856		-0.505366	0.953626		0.55645	0.958855		-0.0659744	0.934963		-0.605176	0.977837		-0.0783027	0.990825		0.378993	0.942591		-0.389298	0.978307		0.370922	0.972323		0.117211	0.965142		0.440055	0.990207		0.178415	0.976956		-0.710237	0.966383
-0.229658	0.986832		-0.664394	0.932229		1.22179	0.939217		-0.132455	0.979161		1.29746	0.941105		-0.317862	0.97696		0.11859	0.968559		-0.19876	0.905604		-0.0345325	0.958643		0.0384653	0.988245		0.27079	0.984807		0.289375	0.983056		-1.14926	0.936618		0.170342	0.951431		-0.105028	0.99372		-0.0746332	0.976502		-1.35928	0.939294
-0.449158	0.977136		-0.305298	0.946806		0.170735	0.981122		0.146771	0.970383		-0.155408	0.983679		-0.536183	0.958585		0.233366	0.962853		-0.288872	0.886821		-0.222424	0.958278		-0.0841509	0.981197		-0.100607	0.991088		-0.282744	0.984769		-1.16313	0.943608		-0.226294	0.975353		0.0482957	0.991755		0.123877	0.977626		-2.26784	0.903682
-0.441853	0.985669		0.379344	0.901369		-0.663882	0.930204		-0.117278	0.979667		0.732123	0.95619		-0.732396	0.922839		-0.178553	0.960556		-0.522768	0.865443		-0.58223	0.968846		-0.28048	0.975754		-0.125325	0.988221		-0.532618	0.970102		-1.10481	0.924808		-0.0740885	0.969728		-0.194358	0.991433		-0.107301	0.976062		-2.47143	0.893705
-0.101832	0.984251		-0.141525	0.879607		0.459843	0.955237		-0.0469097	0.969511		0.32303	0.974596		-0.267635	0.90867		-0.269564	0.956212		-0.541513	0.865776		-0.454288	0.956304		-0.549652	0.973002		0.680276	0.918867		-0.276839	0.980702		-1.44471	0.876362		-0.0269496	0.981008		-0.00953888	0.989538		-0.0288137	0.964884		-1.78925	0.893876
-0.307575	0.980838		0.166975	0.91173		0.950163	0.942579		0.467744	0.944675		1.00161	0.959846		-0.484954	0.914532		0.0381307	0.962097		-0.345449	0.865212		-0.975533	0.959461		-0.62755	0.968881		0.313672	0.985443		-1.18562	0.941211		-0.951608	0.962892		-0.0838777	0.965956		0.184977	0.988788		2.56253	0.868802		-2.48794	0.885899
-0.286627	0.979986		-0.423615	0.883871		0.743509	0.952597		0.0864477	0.961629		-0.0203975	0.977012		-0.596448	0.941862		-0.501183	0.907012		-0.154711	0.864275		0.21438	0.949535		-0.345641	0.966047		0.151129	0.985504		-0.304739	0.975989		-1.0446	0.95734		-0.0381237	0.963844		0.120007	0.987935		2.15231	0.869158		-1.27927	0.922556
-0.431868	0.975708		-0.192796	0.886147		0.47337	0.968378		0.0516132	0.961371		-0.740161	0.964074		-0.640387	0.967729		-0.211467	0.970268		-0.313732	0.863143		-0.329442	0.960747		-0.78639	0.959937		-0.0162954	0.988863		-0.743028	0.971059		-0.805962	0.957574		-0.15164	0.950658		0.147974	0.98707		1.96835	0.884337		-1.51172	0.919514
-0.178342	0.976269		-0.905857	0.8494		-0.173776	0.976907		-0.0491362	0.967714		-0.357873	0.957905		-0.265973	0.980873		-0.247465	0.948819		-0.24283	0.861698		-0.245827	0.94915		-0.731284	0.968754		0.467013	0.958003		-0.54859	0.975317		-0.783726	0.918877		0.223575	0.889474		0.338533	0.987295		0.471876	0.961472		-1.76285	0.936258
-0.24579	0.978067		0.667488	0.878854		-0.937334	0.918935		-0.0215345	0.958062		-0.275363	0.972959		-0.398341	0.973092		0.545751	0.946464		0.612331	0.858759		-0.210025	0.946587		-0.500056	0.963532		0.280986	0.986899		1.39451	0.922303		-0.689602	0.950313		0.038698	0.9696		0.125526	0.983578		0.557685	0.94958		-0.76376	0.967905
-0.313926	0.978117		-0.0524346	0.885869		-0.15035	0.959867		1.05009	0.896443		-0.317799	0.975099		-0.95785	0.937468		0.19909	0.946869		-0.112343	0.862925		-0.462696	0.934797		-0.47714	0.959935		0.343637	0.97618		0.000622272	0.981002		0.682381	0.961991		-0.128742	0.974696		0.292567	0.980744		0.216317	0.965594		-0.66146	0.965909
-0.285963	0.975971		0.374688	0.916561		1.1793	0.92609		0.241413	0.942149		-0.826814	0.96231		-0.804091	0.918199		-0.208348	0.946809		0.120139	0.895534		-0.436603	0.950156		-0.343642	0.965995		-0.184156	0.967314		-0.0350466	0.982497		-0.887273	0.958525		0.267774	0.965196		0.544751	0.979702		1.12397	0.920307		-0.869153	0.96158
-0.448932	0.973794		0.623568	0.865357		0.041421	0.969727		0.315051	0.94557		-0.845124	0.960683		-0.751206	0.912403		-0.00226108	0.960186		0.307645	0.927064		-0.567265	0.952803		0.158108	0.957153		0.5533	0.941271		-0.360808	0.968784		-1.3023	0.930945			0.965621		0.314922	0.980264		-0.081065	0.964634		-0.689403	0.963355
-0.440308	0.970188		0.10325	0.87653		0.0579335	0.961399		-0.0195751	0.957665		-0.547297	0.963346		-1.18286	0.879165		-0.332111	0.955083		0.914215	0.937634		0.100113	0.963489		-0.136411	0.949295		0.36741	0.968671		-0.683367	0.956882		-1.3863	0.925594		-0.229288	0.975531		0.163152	0.976051		-0.150161	0.967532		-0.563656	0.960578
-0.660127	0.967446		-0.327609	0.886312		0.611465	0.937388		0.0564598	0.954838		-0.834476	0.957397		-0.217929	0.930991		-0.286219	0.92967		0.0455658	0.933544		-0.287406	0.962011		-0.555037	0.939625		0.510173	0.943603		-1.35026	0.912426		-1.05115	0.950621		0.261879	0.973545		0.397882	0.974642		-0.289829	0.961019		-0.532881	0.952791
-0.629429	0.961702		-0.336485	0.889993		0.196568	0.970529		0.227917	0.942948		0.24511	0.958819		0.0208719	0.934747		0.23582	0.953578		-0.522257	0.892943		-0.190734	0.926252		-1.14109	0.944668		-0.109983	0.967333		0.30069	0.945288		-0.0556517	0.95878			0.953694		0.158013	0.97398		0.979471	0.898272		-0.663757	0.950952
-0.382162	0.964741		-0.73591	0.913227		-0.933232	0.904458		0.00180523	0.954357		0.172238	0.956183		-0.41492	0.92705		-0.216912	0.945879		-0.49027	0.876401		-0.740191	0.939366		-1.24801	0.936827		0.415274	0.956069		1.73035	0.894023		-0.557005	0.94865		-0.131824	0.971059		0.359199	0.972954		0.502888	0.949007		-0.855886	0.943142
-0.338481	0.958295		-0.148158	0.969851		-0.993369	0.898806		-0.134723	0.953242		0.198483	0.950098		-0.611057	0.928622		-0.825918	0.90913		-0.151015	0.872101		-0.77437	0.935458		-1.01561	0.932876		0.158733	0.965837		0.0318963	0.965582		-1.35774	0.893404		0.392033	0.928634		0.583454	0.972815		-0.282554	0.955616		-0.443994	0.951181
-0.541147	0.944974		1.10132	0.930245		-1.00353	0.894715		-0.0923564	0.95036		1.29933	0.933008		-0.665508	0.897571		0.385833	0.939749		-0.589239	0.880223		-0.845751	0.938436		-1.30667	0.916768		0.222228	0.971486		-0.0735674	0.977941		-1.33081	0.908357		-0.569642	0.943578		0.18394	0.967901		-0.326768	0.958045		-0.831912	0.944116
2.62211	0.834997		2.66228	0.869489		-0.917514	0.892112		0.0279995	0.940247		-0.278785	0.963176		-0.419939	0.938262		-0.102212	0.947359		1.26656	0.907076		-0.356906	0.938851		-0.841554	0.918044		0.412757	0.960849		-0.0743172	0.979382		-1.16156	0.911788		0.849399	0.967252		0.207603	0.969265		0.870665	0.905247		-1.0953	0.943014
2.43974	0.811208		2.35889	0.87408		-0.876445	0.903618		-0.0492275	0.944071		0.833562	0.935951		0.0812604	0.918512		-0.49833	0.906042		-0.205631	0.956606		-0.358864	0.932201		-0.54329	0.923953		-0.270098	0.96661		-0.313519	0.968157		-1.49356	0.856901		0.231458	0.959048		0.395759	0.967713		-0.185337	0.945294		-1.29923	0.942598
1.47319	0.844061		1.64676	0.887894		-0.932675	0.885573		0.457489	0.905231		-0.323958	0.951349		-0.430704	0.865426		0.678622	0.928025		-0.120266	0.957973		-0.651757	0.930555		-0.40627	0.925475		0.814954	0.900049		-0.133387	0.97193		-0.93374	0.929882		0.645235	0.942694		0.457968	0.966692		-0.106934	0.947654		-0.887608	0.946204
2.02704	0.758306		1.74104	0.7541		1.72053	0.810849		2.13529	0.679937		-0.535976	0.843972		1.28854	0.818042		2.527	0.712129		0.514369	0.730408		0.637996	0.804479		0.903966	0.804519		2.72515	0.709272		-0.0969546	0.859773		2.32983	0.76766		2.65514	0.711414		1.3091	0.74379		0.890664	0.773307		-0.0533364	0.82473
1.71396	0.761986		2.77872	0.73491		1.95504	0.812323		2.70726	0.659317		-0.430305	0.839341		1.11155	0.82105		2.26068	0.705108		2.58123	0.697959		-0.746488	0.8262		1.09325	0.831399		2.6404	0.715168		-0.487266	0.85699		0.540705	0.767983		2.72941	0.704499		1.32126	0.739105		2.47953	0.720835		0.134319	0.832268
0.845259	0.789251		2.52274	0.736935		1.35647	0.82579		2.32468	0.667595		0.838646	0.830237		0.656168	0.822873		1.99134	0.699726		0.625924	0.729769		-1.67918	0.791806		1.18156	0.826163		2.56941	0.717683		-0.899779	0.827193		0.215091	0.79024		2.50622	0.736456		1.59494	0.732545		2.14847	0.738994		0.154475	0.826577
0.855112	0.796584		1.5752	0.756875		0.332388	0.79259		1.54805	0.752497		0.24227	0.843679		0.528506	0.807529		1.80348	0.696551		0.28293	0.729954		-1.03118	0.819439		1.36257	0.820481		2.54412	0.730191		-0.428676	0.859906		-0.366928	0.771853		2.43633	0.724734		2.01163	0.730026		2.13789	0.737068		0.128753	0.812484
1.1945	0.790744		0.41056	0.757556		-0.230901	0.765992		1.69668	0.734227		0.612931	0.844394		0.735914	0.825529		1.878	0.694097		0.927078	0.730178		0.827269	0.813475		1.48013	0.815313		2.5736	0.735594		-0.701456	0.845481		-0.277999	0.762619		1.7129	0.7471		1.8997	0.716052		2.00784	0.727621		0.198641	0.827577
0.879174	0.791935		0.386794	0.758922		-0.31982	0.757025		1.68153	0.727921		-0.791145	0.853492		-0.0384945	0.78421		1.88657	0.697973		1.62713	0.728158		2.19147	0.811303		1.16665	0.810401		2.0632	0.751604		-1.02635	0.824443		-0.607992	0.790538		2.82399	0.740917		1.20463	0.73746		1.70923	0.742687		0.170346	0.830433
0.826695	0.799834		0.70075	0.764036		-0.431864	0.75237		2.61457	0.638107		-0.303916	0.848864		0.829753	0.794766		1.82387	0.693491		1.53526	0.731318		1.90736	0.809069		1.28418	0.819775		2.55209	0.73298		-0.269088	0.861728		-0.404771	0.78755		2.75294	0.727659		0.795997	0.736719		1.7804	0.737329		0.168691	0.823536
0.758945	0.79367		0.424395	0.762415		-0.301664	0.757736		2.35796	0.641376		0.277822	0.846125		0.176105	0.739898		1.84398	0.697756		2.16036	0.71707		1.21877	0.800969		1.50565	0.820388		1.71943	0.756655		-0.67319	0.821399		0.34675	0.786894		1.61097	0.700907		1.1047	0.741137		1.75395	0.736776		-0.566233	0.802963
1.59964	0.774242		0.497438	0.766814		0.025486	0.810848		2.09029	0.646457		0.775035	0.812101		-0.13081	0.795831		1.83788	0.691751		0.563128	0.705256		0.915567	0.804229		1.55792	0.816153		2.49917	0.715762		-1.59757	0.777993		0.352919	0.79902		1.88119	0.732447		1.64662	0.729494		1.3812	0.775845		-0.421315	0.814478
1.4891	0.762586		0.354528	0.766645		1.96705	0.805814		2.02319	0.640457		-0.408033	0.85284		-0.962324	0.768074		1.87419	0.693871		0.496057	0.714669		0.484596	0.806262		1.27224	0.810377		1.6187	0.751126		-0.334296	0.843153		-0.663176	0.759076		1.13486	0.719371		1.57063	0.696514		1.79911	0.73332		0.0569201	0.802375
0.898325	0.79356		0.364472	0.771192		1.13335	0.821237		2.01993	0.641633		-0.172208	0.832654		-1.28841	0.765723		1.85068	0.70058		1.23552	0.716591		0.234826	0.815805		1.3146	0.817258		1.96672	0.743197		-0.550588	0.838113		-0.44447	0.769715		0.933674	0.730514		1.25659	0.697714		1.90546	0.734898		0.359147	0.803477
0.713131	0.800711		1.30581	0.759785		-0.348917	0.751706		2.02527	0.643457		1.51069	0.802576		-0.162965	0.799867		1.60337	0.69304		1.88471	0.727168		0.878536	0.818894		1.08882	0.804019		2.00431	0.742193		-0.666247	0.838741		-0.76335	0.753169		0.852657	0.73501		1.54039	0.701328		1.99858	0.729259		1.09924	0.785307
0.878954	0.795125		1.87485	0.742189		0.00437829	0.793152		2.00272	0.641487		-0.283701	0.844709		-0.118491	0.787674		1.64354	0.688204		0.307397	0.72639		0.798976	0.807882		1.13108	0.804663		1.85564	0.755026		-1.45	0.759864		-0.401108	0.76316		1.63005	0.739472		1.83918	0.703474		2.01817	0.724622		1.00107	0.774737
0.886387	0.790028		0.515411	0.741976		-0.0508322	0.778856		1.9247	0.641148		-0.385634	0.852535		-0.869789	0.761443		1.65864	0.684839		0.182207	0.74337		0.981362	0.815844		0.815639	0.806824		1.78579	0.755003		-1.38132	0.780458		-0.525084	0.747992		2.14072	0.73125		1.74261	0.702993		1.98126	0.729708		0.498696	0.786871
0.981427	0.794002		0.214336	0.758373		-0.192454	0.758745		1.94646	0.648901		0.696365	0.803586		-0.233246	0.805713		1.70781	0.689948		1.54036	0.700988		1.11601	0.817621		0.854059	0.798916		2.33376	0.743064		-0.292767	0.838058		-0.899839	0.724212		1.55359	0.743149		1.81876	0.699265		2.16493	0.732008		0.354356	0.782022
1.03125	0.784165		0.273594	0.762274		-0.234214	0.760726		1.87255	0.646397		0.952566	0.827497		-0.245208	0.810855		1.69406	0.691001		1.88694	0.713037		0.895305	0.807198		0.901275	0.796086		2.24091	0.758068		0.857669	0.807639		-0.170736	0.760698		1.7841	0.739059		1.88913	0.690729		2.18482	0.726925		-0.228679	0.782061
0.853739	0.800749		0.412317	0.773013		-0.323923	0.768262		1.96511	0.64634		-0.365459	0.838843		0.0267453	0.823659		1.79186	0.694524		0.179743	0.71768		1.08595	0.805221		2.2426	0.787042		1.56915	0.772281		0.491559	0.82914		-0.386489	0.733569		2.08234	0.702197		1.44343	0.685136		2.02176	0.731155		-1.39214	0.745149
0.992299	0.798376		0.359728	0.763946		2.19875	0.805482		1.77729	0.638883		-0.262344	0.837555		-0.732549	0.792517		1.62449	0.694265		0.949091	0.704084		0.762523	0.792503		2.42776	0.796469		1.24637	0.779556		-0.126793	0.856818		-0.0839861	0.756777		2.18985	0.709837		0.64443	0.672404		2.00247	0.731822		-0.57725	0.787699
1.37642	0.790735		0.336806	0.759054		2.02679	0.810081		1.77032	0.636994		0.936057	0.790553		0.0862519	0.815531		1.60017	0.683143		2.14991	0.699194		0.888623	0.799988		2.03203	0.802168		1.56797	0.773924		-0.549724	0.847328		0.849329	0.782384		2.20435	0.722209		1.38311	0.690502		1.82588	0.725405		-0.682572	0.769299
1.59716	0.755091		1.38877	0.74113		1.17185	0.833231		1.74731	0.636687		1.27847	0.797458		0.133191	0.810273		1.54678	0.700292		1.55226	0.697076		0.971881	0.801603		1.35071	0.78792		1.44666	0.75577		-0.139766	0.863334		-0.524227	0.772391		1.14348	0.691051		1.56838	0.694946		1.85292	0.731999		-1.15018	0.761914
2.81088	0.684915		2.45779	0.699144		0.785028	0.830098		1.84093	0.636604		0.878268	0.822778		-1.17233	0.724399		1.43756	0.685325		0.250039	0.711003		1.2327	0.800992		0.830963	0.786612		1.25878	0.777603		-0.373677	0.848233		-0.837469	0.75516		2.06409	0.719948		1.2573	0.674552		1.86164	0.732355		-1.00207	0.768345
2.50693	0.705877		2.13306	0.687738		0.51656	0.824875		1.73506	0.639841		1.24498	0.801596		0.425282	0.819039		1.53496	0.685839		0.196978	0.723325		1.15164	0.802885		0.497986	0.802563		1.10683	0.786408		-0.792988	0.822932		-0.737845	0.763953		1.61771	0.711682		0.806017	0.649953		1.89585	0.732174		-0.515485	0.778943
1.12706	0.759207		1.04278	0.729549		-0.191667	0.765701		1.81973	0.647369		0.190129	0.837612		-0.948569	0.720571		2.01437	0.708891		0.656112	0.707147		0.937424	0.80548		0.568786	0.797693		1.17802	0.770084		-1.61316	0.763591		-0.0331206	0.780375		1.35229	0.717755		0.188677	0.645314		1.89962	0.731992		-0.679963	0.789778
0.682993	0.786189		0.440582	0.741532		0.0552097	0.776094		1.67517	0.637907		0.788163	0.81523		-1.51812	0.720346		2.33948	0.70965		1.27413	0.705012		1.26769	0.804662		0.607399	0.79342		0.918244	0.773162		-0.419231	0.819258		-0.53001	0.771311		1.13279	0.687591		-1.52902	0.529354		1.82514	0.730339		-1.02726	0.787425
0.633742	0.78958		0.306728	0.746633		1.90375	0.796673		1.65895	0.639433		2.74703	0.745723		-2.8807	0.696553		2.14482	0.708663		0.397228	0.707038		1.28505	0.804637		0.730923	0.794117		1.09043	0.759542		-0.876585	0.805887		-0.895442	0.737761		1.23757	0.708938		0.200146	0.612769		1.7465	0.729936		-0.56283	0.795545
0.581432	0.796548		0.360201	0.752323		2.18093	0.809612		1.65279	0.639239		1.29143	0.807373		-2.10468	0.780941		1.74689	0.6997		1.48858	0.694028		0.941775	0.789048		0.828192	0.789326		1.595	0.7519		-1.06625	0.751167		-0.957686	0.743211		0.989769	0.722171		0.377742	0.678616		1.71129	0.734327		-0.783507	0.783905
0.692246	0.799919		0.730209	0.748843		0.866553	0.816519		1.63777	0.645852		-0.28314	0.828073		0.526176	0.808598		1.6534	0.690135		1.86227	0.707551		1.15991	0.798094		0.747328	0.787261		2.32634	0.754879		-0.498547	0.827695		-0.916106	0.735298		0.725004	0.733164		0.563616	0.685662		1.74681	0.737931		-0.16882	0.785683
1.76639	0.757211		0.381487	0.759272		-0.0332485	0.768747		1.69638	0.639492		-0.364758	0.82675		-0.0714543	0.776935		1.77505	0.688619		0.504884	0.714506		1.18194	0.775615		1.10863	0.783366		2.42118	0.745872		-0.847787	0.803185		-0.492144	0.76673		0.824386	0.711239		0.173113	0.677912		1.7972	0.73244		-0.477212	0.794621
1.23636	0.761452		1.16382	0.741614		-0.331089	0.74556		1.72374	0.635948		-0.0593739	0.828421		-0.548676	0.778101		1.84539	0.691007		0.0558117	0.713579		1.1412	0.76997		-0.385571	0.788008		2.26579	0.750527		-1.39555	0.774969		1.07102	0.764798		0.65009	0.704514		0.305741	0.666215		1.97685	0.738319		-0.512878	0.801413
0.709964	0.787805		1.05629	0.719379		-0.0729721	0.753947		1.58137	0.638839		-0.193303	0.8246		-1.05698	0.77143		1.83138	0.687431		0.575448	0.710592		1.31285	0.788427		-0.273363	0.790317		2.28596	0.750061		-0.289233	0.83292		0.802366	0.781776		0.667686	0.713594		0.0438296	0.693708		1.9468	0.737427		-0.590285	0.79631
0.704962	0.948148		-0.00329112	0.977802		0.670618	0.969543		1.69794	0.809904		0.636934	0.968504		-0.165772	0.918863		-0.435909	0.971885		-0.906478	0.932264		1.41466	0.934299		0.796261	0.947922		0.751034	0.945165		0.355934	0.983087		-1.69259	0.929294		0.1016	0.961274		0.0896502	0.970521		1.25936	0.902145		-0.354272	0.958602
0.338913	0.972406		0.015878	0.980176		0.0873059	0.97812		1.91185	0.83936		1.71323	0.929297		0.35126	0.971621		-0.583681	0.967781		-1.30563	0.894181		1.29784	0.956549		0.238539	0.97242		0.619157	0.972046		1.99547	0.898722		-1.6939	0.933661		0.0948352	0.960498		0.0649825	0.983596		2.26392	0.906743		0.251112	0.984659
0.0192246	0.977837		-0.337872	0.980938		-0.857864	0.913257		1.65726	0.8721		0.694624	0.973128		0.16736	0.985606		-0.756436	0.926367		-1.77355	0.864684		0.952365	0.961471		0.463466	0.979458		0.77489	0.942456		0.499122	0.968343		-1.4907	0.926995		0.417494	0.874342		-0.0332012	0.984257		2.18564	0.916518		0.111442	0.982908
-0.076979	0.979139		-0.330677	0.977354		-0.0846266	0.983558		1.72857	0.851367		0.532969	0.976408		-0.837848	0.95925		-0.749322	0.92135		-1.77956	0.866417		0.478308	0.974859		0.0944372	0.983338		0.624984	0.970044		1.89674	0.887876		-1.60091	0.915615		0.152455	0.879545		0.0954934	0.986733		1.89656	0.92215		-0.731717	0.922883
0.0750953	0.985398		-0.642701	0.956263		-0.277811	0.985851		1.20651	0.930136		0.404449	0.985753		0.118728	0.989241		-0.660948	0.946046		-1.87881	0.879478		0.204556	0.982578		-0.202354	0.981682		0.453516	0.963772		0.953958	0.936679		-1.52135	0.951065		-0.150282	0.984756		0.195055	0.989391		0.548895	0.969303		-2.01401	0.88126
0.0318407	0.989638		-0.541885	0.972214		0.0174431	0.986563		0.347299	0.979719		1.43237	0.936915		-0.521316	0.985527		-1.18903	0.831082		-2.03268	0.905308		0.331529	0.986366		-0.111687	0.990582		0.681185	0.954262		0.0860314	0.974339		-1.24915	0.948356		-0.112542	0.986361		-0.0438243	0.993477		-0.245094	0.971545		0.0141514	0.980014
0.232052	0.990632		-0.0579689	0.983029		-0.765283	0.952617		0.0470326	0.990553		0.734629	0.981149		0.129817	0.990294		-0.679122	0.949689		-1.5803	0.955976		0.105679	0.988766		0.104194	0.989525		0.279966	0.991442		0.146265	0.986008		-0.566003	0.981182		-0.0181286	0.973903		-0.0747821	0.995423		-0.421436	0.972008		-0.0518427	0.986575
0			0			0			0			0			0			0			0			0			0			0			0			0			0			0			0			0
-0.16736	0.992658		-0.44866	0.971577		-1.21103	0.904658		-0.0430396	0.986989		0.00925679	0.986525		-0.375549	0.970536		-0.122672	0.989901		-1.64627	0.931472		-0.499497	0.982688		0.0258916	0.991624		0.658959	0.917329		-0.243033	0.9757		-0.195081	0.968559		0.0990822	0.932405		0.365273	0.992094		-0.243021	0.982343		-0.76208	0.952345
0.00239368	0.988316		-0.722363	0.936533		0.456504	0.98672		-0.0854225	0.984503		2.03209	0.918701		-0.188045	0.985691		-0.560532	0.968406		-1.77906	0.910769		0.0711466	0.974584		0.14266	0.987063		0.550756	0.970812		0.43564	0.987707		-1.71527	0.934356		0.152213	0.922134		-0.17981	0.994699		-0.49607	0.962018		-1.41112	0.907951
-0.217106	0.984505		-0.363267	0.940522		-0.594548	0.952668		0.193804	0.976718		0.579221	0.975108		-0.406367	0.968679		-0.445756	0.966507		-1.86917	0.893626		-0.116745	0.972323		0.0200435	0.973363		0.179359	0.993659		-0.136479	0.980809		-1.72913	0.938596		-0.244423	0.981412		-0.0264864	0.991769		-0.29756	0.972752		-2.31968	0.871576
-0.209801	0.988576		0.321375	0.908229		-1.42917	0.835513		-0.0702457	0.982239		1.46675	0.937783		-0.602579	0.931122		-0.857675	0.910292		-2.10306	0.861494		-0.476551	0.976206		-0.176286	0.965518		0.154641	0.981578		-0.386353	0.971958		-1.67081	0.914875		-0.0922171	0.986218		-0.26914	0.991823		-0.528738	0.967704		-2.52327	0.859204
0.13022	0.981586		-0.199494	0.89306		-0.305441	0.976945		0.000122874	0.975908		1.05766	0.961631		-0.137818	0.913307		-0.948686	0.878		-2.12181	0.866209		-0.348609	0.968749		-0.445458	0.960472		0.960242	0.885772		-0.130574	0.985063		-2.01071	0.871227		-0.0450782	0.971488		-0.084321	0.989506		-0.45025	0.964591		-1.84109	0.85968
-0.0755229	0.983854		0.109006	0.914024		0.18488	0.985552		0.514777	0.952934		1.73624	0.939244		-0.355137	0.921917		-0.640991	0.950268		-1.92574	0.882529		-0.869853	0.962074		-0.523356	0.960612		0.593638	0.970379		-1.03936	0.934825		-1.51761	0.960546		-0.102006	0.983129		0.110195	0.989376		2.14109	0.898038		-2.53978	0.850418
-0.0545755	0.984941		-0.481584	0.892145		-0.0217738	0.986516		0.13348	0.966788		0.714231	0.968852		-0.466632	0.950688		-1.1803	0.801752		-1.73501	0.892237		0.320059	0.964142		-0.241447	0.961941		0.431095	0.970778		-0.158474	0.979211		-1.6106	0.957266		-0.0562523	0.986443		0.0452252	0.98726		1.73088	0.910498		-1.33112	0.885568
-0.199816	0.980847		-0.250765	0.892722		-0.291913	0.974481		0.0986457	0.963781		-0.0055326	0.976955		-0.510571	0.976449		-0.890589	0.909804		-1.89403	0.88139		-0.223763	0.97082		-0.682195	0.953245		0.263671	0.984381		-0.596764	0.968825		-1.37196	0.9526		-0.169768	0.966383		0.0731918	0.986957		1.54691	0.919269		-1.56357	0.887145
0.0537097	0.97434		-0.963826	0.848328		-0.939059	0.928756		-0.00210363	0.970084		0.376755	0.960177		-0.136157	0.983344		-0.926587	0.893423		-1.82313	0.881149		-0.140148	0.96252		-0.62709	0.96954		0.746979	0.931291		-0.402326	0.976853		-1.34973	0.915928		0.205447	0.834982		0.26375	0.988707		0.0504395	0.966504		-1.81469	0.905106
-0.0137386	0.978675		0.609519	0.880504		-1.70262	0.818069		0.0254981	0.965619		0.459266	0.966123		-0.268524	0.98068		-0.133371	0.983412		-0.967965	0.910978		-0.104346	0.958795		-0.395862	0.967097		0.560952	0.974961		1.54078	0.914592		-1.25561	0.941325		0.0205694	0.966391		0.0507443	0.985086		0.136249	0.962855		-0.815602	0.948915
-0.0818739	0.982138		-0.110403	0.902058		-0.915634	0.936528		1.09712	0.907055		0.41683	0.970873		-0.828033	0.95847		-0.480032	0.966762		-1.69264	0.890212		-0.357017	0.949962		-0.372945	0.96576		0.623603	0.973914		0.146887	0.977536		0.116377	0.96853		-0.146871	0.969218		0.217785	0.980267		-0.20512	0.969206		-0.713303	0.949915
-0.0539112	0.977056		0.316719	0.911785		0.414014	0.980197		0.288446	0.94733		-0.092185	0.976271		-0.674274	0.936181		-0.88747	0.897826		-1.46016	0.918789		-0.330924	0.959118		-0.239448	0.965236		0.0958097	0.979261		0.111218	0.980701		-1.45328	0.956879		0.249645	0.955905		0.469969	0.978789		0.702538	0.955115		-0.920996	0.943562
-0.21688	0.978553		0.565599	0.866833		-0.723862	0.942099		0.362084	0.951751		-0.110495	0.975742		-0.621389	0.930241		-0.681383	0.93886		-1.27265	0.954196		-0.461586	0.960823		0.262302	0.961971		0.833267	0.922151		-0.214544	0.968447		-1.8683	0.934051			0.977888		0.24014	0.979452		-0.502501	0.942841		-0.741246	0.956546
-0.208256	0.97491		0.0452815	0.891853		-0.70735	0.963761		0.0274574	0.960001		0.187331	0.974062		-1.05305	0.905785		-1.01123	0.877797		-0.666081	0.965562		0.205792	0.968916		-0.0322162	0.95157		0.647376	0.960676		-0.537103	0.953944		-1.9523	0.925351		-0.247416	0.966365		0.08837	0.97618		-0.571598	0.95172		-0.615499	0.958005
-0.428075	0.972137		-0.385578	0.895283		-0.153818	0.981393		0.103492	0.959535		-0.0998467	0.973425		-0.0881125	0.931015		-0.965341	0.844862		-1.53473	0.940414		-0.181727	0.964516		-0.450842	0.941273		0.790139	0.927638		-1.204	0.90516		-1.61715	0.948937		0.24375	0.978117		0.3231	0.973923		-0.711266	0.939187		-0.584723	0.946958
-0.397377	0.967119		-0.394454	0.899743		-0.568716	0.957024		0.27495	0.950683		0.979739	0.941856		0.150688	0.930728		-0.443302	0.972412		-2.10255	0.886736		-0.0850548	0.941159		-1.0369	0.943133		0.169983	0.973577		0.446955	0.945783		-0.621655	0.966595			0.979796		0.0832306	0.973597		0.558035	0.939779		-0.7156	0.948544
-0.15011	0.961802		-0.793879	0.906655		-1.69851	0.804965		0.0488378	0.960916		0.906867	0.939802		-0.285104	0.939987		-0.896033	0.883394		-2.07057	0.878		-0.634512	0.949546		-1.14381	0.93256		0.69524	0.948575		1.87662	0.881908		-1.12301	0.944486		-0.149953	0.963573		0.284417	0.972609		0.0814519	0.965221		-0.907729	0.92602
-0.106429	0.957282		-0.206127	0.969309		-1.75865	0.797632		-0.0876906	0.959829		0.933112	0.932604		-0.48124	0.939291		-1.50504	0.802324		-1.73131	0.88843		-0.668691	0.947278		-0.911416	0.930898		0.438699	0.962815		0.178161	0.965646		-1.92374	0.887577		0.373905	0.893757		0.508671	0.973775		-0.70399	0.921075		-0.495836	0.944576
-0.309095	0.951255		1.04335	0.916076		-1.76881	0.796244		-0.0453238	0.957043		2.03395	0.909938		-0.535691	0.918868		-0.293289	0.971284		-2.16953	0.867713		-0.740072	0.950514		-1.20248	0.916069		0.502194	0.966505		0.0726973	0.975725		-1.89681	0.903108		-0.587771	0.975846		0.109158	0.968993		-0.748204	0.940579		-0.883755	0.936583
2.85417	0.829776		2.60431	0.850389		-1.6828	0.79792		0.0750321	0.948949		0.455844	0.958647		-0.290123	0.942509		-0.781334	0.907137		-0.313739	0.95492		-0.251227	0.949268		-0.737359	0.922392		0.692723	0.949973		0.0719475	0.977209		-1.72756	0.901307		0.831271	0.95513		0.132821	0.970183		0.449229	0.945823		-1.14714	0.936819
2.67179	0.803186		2.30092	0.853459		-1.64173	0.813293		-0.00219491	0.947336		1.56819	0.914424		0.211077	0.914709		-1.17745	0.8025		-1.78593	0.944003		-0.253185	0.944244		-0.439096	0.926008		0.00986816	0.969304		-0.167254	0.958811		-2.05957	0.854333		0.21333	0.943807		0.320977	0.96756		-0.606773	0.936062		-1.35108	0.928371
1.70525	0.834624		1.58879	0.877304		-1.69796	0.785556		0.504521	0.913347		0.410671	0.941681		-0.300887	0.877841		-0.000499917	0.960832		-1.70056	0.941911		-0.546078	0.941567		-0.302075	0.927279		1.09492	0.875046		0.012878	0.976049		-1.49974	0.924574		0.627106	0.971869		0.383186	0.967947		-0.52837	0.923515		-0.939451	0.940742
2.25909	0.750164		1.68307	0.729572		0.955243	0.836522		2.18232	0.688952		0.198653	0.834045		1.41836	0.81876		1.84788	0.688446		-1.06593	0.76596		0.743675	0.814792		1.00816	0.81441		3.00511	0.695519		0.0493101	0.855521		1.76382	0.791245		2.63701	0.692041		1.23432	0.742736		0.469228	0.791588		-0.105179	0.812425
1.94602	0.751925		2.72075	0.706725		1.18976	0.841962		2.7543	0.666791		0.304324	0.827674		1.24137	0.823608		1.58156	0.678531		1.00093	0.770618		-0.640809	0.832302		1.19745	0.836506		2.92036	0.701989		-0.341001	0.84984		-0.025298	0.768548		2.71128	0.69062		1.24648	0.738907		2.0581	0.749783		0.0824764	0.837722
1.07731	0.778775		2.46477	0.70906		0.591192	0.835674		2.37171	0.672909		1.57327	0.796047		0.785985	0.82945		1.31221	0.672963		-0.954372	0.76549		-1.5735	0.794023		1.28575	0.831764		2.84937	0.70267		-0.753514	0.81766		-0.350912	0.800437		2.48809	0.717133		1.52015	0.731415		1.72704	0.769488		0.102633	0.830058
1.08716	0.788651		1.51723	0.744016		-0.432895	0.744568		1.59508	0.75323		0.976899	0.814998		0.658322	0.818369		1.12436	0.666393		-1.29737	0.759391		-0.925498	0.826951		1.46676	0.82084		2.82409	0.714178		-0.282411	0.855913		-0.932931	0.776175		2.4182	0.696841		1.93685	0.72885		1.71645	0.766163		0.0769104	0.822345
1.42655	0.778737		0.352591	0.764201		-0.996184	0.683197		1.74372	0.740093		1.34756	0.813029		0.86573	0.835747		1.19888	0.664339		-0.653218	0.781901		0.932948	0.828327		1.58433	0.821104		2.85357	0.717181		-0.555192	0.83655		-0.844002	0.773826		1.69477	0.711186		1.82491	0.715273		1.58641	0.760685		0.146799	0.830398
1.11123	0.780706		0.328825	0.761193		-1.0851	0.677804		1.72856	0.735889		-0.0565164	0.84826		0.091322	0.806741		1.20745	0.666649		0.0468334	0.783227		2.29715	0.824988		1.27084	0.818145		2.34317	0.73032		-0.880086	0.819218		-1.17399	0.799796		2.80586	0.723807		1.12984	0.736125		1.28779	0.776431		0.118504	0.830048
1.05875	0.790544		0.642781	0.762034		-1.19715	0.670419		2.66161	0.644314		0.430713	0.832811		0.95957	0.801447		1.14474	0.661811		-0.0450386	0.782461		2.01304	0.819717		1.38837	0.827458		2.83206	0.712432		-0.122824	0.861945		-0.970775	0.794178		2.73481	0.709295		0.721215	0.735905		1.35896	0.773692		0.116849	0.829099
0.990997	0.782127		0.366426	0.764139		-1.06695	0.67552		2.40499	0.646512		1.01245	0.815872		0.305921	0.771956		1.16485	0.666099		0.580068	0.782319		1.32445	0.813289		1.60984	0.82272		1.9994	0.734379		-0.526926	0.810784		-0.219253	0.79192		1.59285	0.656025		1.02992	0.74031		1.33252	0.768816		-0.618076	0.779647
1.83169	0.764953		0.439469	0.76695		-0.739797	0.766793		2.13732	0.651946		1.50966	0.787612		-0.000993616	0.815679		1.15876	0.657651		-1.01717	0.744277		1.02125	0.816827		1.66211	0.818144		2.77913	0.698963		-1.45131	0.765838		-0.213084	0.807437		1.86306	0.695956		1.57183	0.728322		0.959764	0.803217		-0.473158	0.794203
1.72115	0.750132		0.296559	0.76754		1.20177	0.846012		2.07022	0.64495		0.326596	0.828563		-0.832507	0.794507		1.19506	0.661202		-1.08424	0.757622		0.590276	0.820497		1.37643	0.818867		1.89867	0.727016		-0.188031	0.842628		-1.22918	0.76322		1.11673	0.674241		1.49585	0.695663		1.37768	0.762411		0.00507743	0.791306
1.13038	0.784522		0.306503	0.772895		0.368067	0.831429		2.06697	0.648541		0.56242	0.825776		-1.15859	0.787617		1.17156	0.673547		-0.344771	0.776746		0.340505	0.828139		1.41879	0.824836		2.24669	0.72099		-0.404324	0.832203		-1.01047	0.774635		0.915545	0.684491		1.18181	0.695896		1.48403	0.763058		0.307304	0.797696
0.945183	0.795152		1.24784	0.737861		-1.1142	0.673161		2.0723	0.649092		2.24532	0.775326		-0.0331489	0.815042		0.924246	0.664912		0.304414	0.793724		0.984215	0.829962		1.19301	0.813149		2.28428	0.722024		-0.519982	0.828834		-1.32935	0.760942		0.834528	0.686098		1.46561	0.699475		1.57715	0.764067		1.0474	0.76173
1.11101	0.786671		1.81688	0.720365		-0.760905	0.73437		2.04975	0.646684		0.450928	0.824659		0.011326	0.806512		0.964421	0.658569		-1.2729	0.76033		0.904655	0.820659		1.23528	0.81365		2.1356	0.731505		-1.30374	0.75222		-0.967112	0.774618		1.61192	0.710601		1.7644	0.703184		1.59673	0.753749		0.949229	0.766085
1.11844	0.781021		0.457442	0.741681		-0.816115	0.716836		1.97173	0.646325		0.348995	0.838562		-0.739973	0.787488		0.979522	0.655712		-1.39809	0.776532		1.08704	0.830038		0.919833	0.813799		2.06576	0.730721		-1.23505	0.775676		-1.09109	0.753753		2.12259	0.703925		1.66783	0.702527		1.55982	0.758915		0.446853	0.779846
1.21348	0.784992		0.156368	0.759827		-0.957737	0.689007		1.99349	0.653251		1.43099	0.773301		-0.103429	0.823687		1.02869	0.661511		-0.0399331	0.775926		1.22169	0.831454		0.958253	0.800763		2.61373	0.72585		-0.146502	0.83379		-1.46584	0.734889		1.53546	0.703198		1.74398	0.697795		1.7435	0.756625		0.302513	0.769715
1.2633	0.772264		0.215625	0.762869		-0.999497	0.687663		1.91958	0.651109		1.68719	0.801795		-0.115391	0.827633		1.01494	0.663912		0.306648	0.780946		1.00098	0.822967		1.00547	0.805222		2.52087	0.738951		1.00393	0.790941		-0.736739	0.764791		1.76597	0.705917		1.81435	0.690349		1.76338	0.739001		-0.280522	0.770438
1.08579	0.794524		0.354348	0.7722		-1.08921	0.709429		2.01214	0.651897		0.36917	0.820444		0.156562	0.835723		1.11274	0.668984		-1.40055	0.748806		1.19163	0.821557		2.34679	0.794478		1.84912	0.749713		0.637824	0.820785		-0.952492	0.743385		2.06421	0.681841		1.36865	0.683932		1.60033	0.746944		-1.44398	0.709428
1.22435	0.789629		0.30176	0.760831		1.43347	0.847656		1.82432	0.644168		0.472284	0.822713		-0.602733	0.811254		0.945365	0.666003		-0.631205	0.763746		0.868202	0.809367		2.53195	0.805208		1.52634	0.756103		0.0194713	0.843476		-0.649989	0.767514		2.17172	0.681048		0.569648	0.671118		1.58103	0.746085		-0.629092	0.768787
1.60847	0.78377		0.278838	0.760444		1.26151	0.84929		1.81735	0.642775		1.67069	0.76914		0.216068	0.825569		0.921053	0.65654		0.569614	0.767752		0.994302	0.815091		2.13622	0.808121		1.84793	0.74882		-0.403459	0.837493		0.283326	0.79806		2.18622	0.693946		1.30833	0.68873		1.40445	0.745447		-0.734415	0.744663
1.82921	0.74551		1.3308	0.719315		0.406566	0.840744		1.79434	0.642122		2.0131	0.76731		0.263008	0.820937		0.867659	0.67314		-0.0280344	0.763987		1.07756	0.815595		1.4549	0.792599		1.72662	0.73167		0.00649877	0.860058		-1.09023	0.783795		1.12535	0.645053		1.4936	0.694115		1.43148	0.754813		-1.20202	0.734344
3.04293	0.68534		2.39982	0.670141		0.0197447	0.821101		1.88796	0.641368		1.6129	0.796213		-1.04252	0.750225		0.758441	0.655225		-1.33026	0.754122		1.33838	0.815701		0.935157	0.795338		1.53875	0.753497		-0.227413	0.843235		-1.40347	0.768238		2.04596	0.684353		1.18251	0.673275		1.4402	0.758045		-1.05391	0.746857
2.73899	0.705664		2.0751	0.658975		-0.248723	0.806091		1.78209	0.644058		1.97961	0.771993		0.555099	0.827172		0.855836	0.657182		-1.38332	0.765785		1.25732	0.817078		0.60218	0.805952		1.3868	0.761962		-0.646723	0.815612		-1.30385	0.780371		1.59958	0.672167		0.731235	0.648927		1.47442	0.756574		-0.567327	0.75298
1.35911	0.752443		0.984807	0.720296		-0.956951	0.693741		1.86676	0.652248		0.924758	0.814804		-0.818752	0.747067		1.33524	0.684367		-0.924184	0.769487		1.0431	0.818557		0.67298	0.801872		1.45798	0.74511		-1.4669	0.756423		-0.599124	0.779897		1.33416	0.674101		0.113895	0.642096		1.47818	0.755563		-0.731805	0.768497
0.915045	0.784268		0.382613	0.743167		-0.710074	0.713928		1.7222	0.641328		1.52279	0.791591		-1.3883	0.748443		1.66036	0.686991		-0.306162	0.776974		1.37337	0.819729		0.711594	0.803365		1.19821	0.749687		-0.272966	0.820409		-1.09601	0.773944		1.11466	0.635781		-1.6038	0.528573		1.40371	0.751654		-1.0791	0.762695
0.865794	0.788186		0.248759	0.746131		1.13847	0.83981		1.70599	0.643328		3.48166	0.715568		-2.75089	0.724005		1.4657	0.690257		-1.18307	0.764098		1.39073	0.818708		0.835117	0.803486		1.3704	0.734221		-0.73032	0.801086		-1.46145	0.751727		1.21944	0.660994		0.125364	0.611656		1.32506	0.74992		-0.614672	0.781472
0.813484	0.796764		0.302233	0.745065		1.41565	0.849337		1.69983	0.642566		2.02606	0.777153		-1.97486	0.797886		1.06777	0.68172		-0.0917171	0.766207		1.04745	0.804871		0.932386	0.797409		1.87497	0.726497		-0.919989	0.745555		-1.52369	0.754909		0.971641	0.676031		0.30296	0.677039		1.28986	0.756492		-0.83535	0.758813
0.924298	0.798555		0.67224	0.743508		0.101269	0.80336		1.68481	0.648709		0.451489	0.812114		0.655993	0.809638		0.974274	0.662101		0.281977	0.780386		1.26559	0.812252		0.851522	0.798721		2.6063	0.736873		-0.352282	0.821363		-1.48211	0.746597		0.706876	0.681581		0.488834	0.684542		1.32538	0.756946		-0.220663	0.770738
1.99844	0.750636		0.323518	0.754871		-0.798532	0.699355		1.74341	0.642916		0.369871	0.820291		0.0583622	0.787314		1.09593	0.661298		-1.07541	0.765005		1.28762	0.79225		1.21283	0.793901		2.70115	0.728733		-0.701522	0.799681		-1.05815	0.767319		0.806257	0.657732		0.0983313	0.676389		1.37576	0.753666		-0.529054	0.780915
1.46841	0.753044		1.10585	0.722054		-1.09637	0.67065		1.77078	0.637865		0.675255	0.819295		-0.41886	0.794535		1.16627	0.662932		-1.52448	0.753618		1.24688	0.788033		-0.281377	0.793367		2.54576	0.729431		-1.24929	0.773755		0.505021	0.781158		0.631961	0.651298		0.230959	0.665178		1.55541	0.76338		-0.564721	0.792124
0.942016	0.781272		0.998317	0.706932		-0.838255	0.68886		1.6284	0.642405		0.541326	0.818501		-0.92716	0.79631		1.15225	0.658783		-1.00485	0.768219		1.41852	0.80318		-0.169169	0.79685		2.56593	0.732123		-0.142969	0.833427		0.236363	0.789826		0.649557	0.661372		-0.0309526	0.692804		1.52537	0.773133		-0.642128	0.7779
0.872321	0.943918		0.445368	0.948887		1.88164	0.887034		1.74098	0.795189		0.627677	0.954085		0.209777	0.882487		-0.313237	0.971863		0.739792	0.889271		1.91416	0.895617		0.770369	0.9459		0.092075	0.967746		0.598967	0.962806		-1.49751	0.926235		0.00251735	0.944425		-0.275623	0.964578		1.50238	0.877797		0.407808	0.959468
0.506272	0.965819		0.464538	0.941194		1.29833	0.904166		1.95489	0.824757		1.70397	0.902528		0.726809	0.950573		-0.461009	0.973847		0.340637	0.845587		1.79734	0.932133		0.212647	0.974961		-0.0398023	0.961879		2.2385	0.878892		-1.49882	0.92668		-0.00424702	0.959431		-0.300291	0.979669		2.50694	0.893886		1.01319	0.939536
0.186584	0.973236		0.110788	0.98006		0.353161	0.971493		1.7003	0.859741		0.685367	0.960933		0.54291	0.960789		-0.633764	0.940944		-0.127284	0.820826		1.45186	0.943705		0.437575	0.981766		0.115931	0.979997		0.742155	0.934657		-1.29562	0.916476		0.318412	0.964536		-0.398474	0.980007		2.42867	0.908885		0.873522	0.955994
0.0903807	0.978127		0.117982	0.985207		1.1264	0.920736		1.77161	0.837454		0.523712	0.965564		-0.462299	0.982897		-0.62665	0.939437		-0.133286	0.819434		0.977805	0.959711		0.0685455	0.985845		-0.0339754	0.967938		2.13977	0.877526		-1.40583	0.903433		0.0533728	0.958985		-0.26978	0.981991		2.13958	0.91275		0.030363	0.978489
0.242455	0.981386		-0.194042	0.983784		0.933214	0.927442		1.24955	0.918579		0.395193	0.981936		0.494278	0.965069		-0.538276	0.957001		-0.232537	0.855169		0.704053	0.96237		-0.228245	0.986269		-0.205443	0.979179		1.19699	0.907018		-1.32627	0.941495		-0.249364	0.938945		-0.170219	0.98319		0.791916	0.963281		-1.25193	0.958733
0.1992	0.985623		-0.0932252	0.988246		1.22847	0.916026		0.390338	0.967839		1.42312	0.908831		-0.145766	0.979644		-1.06635	0.857474		-0.386412	0.902829		0.831026	0.96865		-0.137579	0.991385		0.0222258	0.980506		0.329065	0.951373		-1.05407	0.945262		-0.211624	0.933155		-0.409098	0.988711		-0.00207287	0.971671		0.776231	0.954286
0.399412	0.985245		0.390691	0.967451		0.445742	0.970267		0.0900722	0.981043		0.725372	0.972856		0.505366	0.953626		-0.55645	0.958855		0.0659744	0.934963		0.605176	0.977837		0.0783027	0.990825		-0.378993	0.942591		0.389298	0.978307		-0.370922	0.972323		-0.117211	0.965142		-0.440055	0.990207		-0.178415	0.976956		0.710237	0.966383
0.16736	0.992658		0.44866	0.971577		1.21103	0.904658		0.0430396	0.986989		-0.00925679	0.986525		0.375549	0.970536		0.122672	0.989901		1.64627	0.931472		0.499497	0.982688		-0.0258916	0.991624		-0.658959	0.917329		0.243033	0.9757		0.195081	0.968559		-0.0990822	0.932405		-0.365273	0.992094		0.243021	0.982343		0.76208	0.952345
0			0			0			0			0			0			0			0			0			0			0			0			0			0			0			0			0
0.169753	0.985141		-0.273703	0.983498		1.66753	0.890032		-0.0423829	0.990579		2.02283	0.892175		0.187504	0.971928		-0.43786	0.981856		-0.132785	0.982158		0.570644	0.964672		0.116768	0.992132		-0.108203	0.975517		0.678673	0.96103		-1.52019	0.937325		0.0531313	0.977523		-0.545083	0.993222		-0.253048	0.982603		-0.64904	0.979069
-0.0497467	0.986311		0.0853923	0.953869		0.616477	0.959231		0.236844	0.976847		0.569964	0.973668		-0.0308177	0.955127		-0.323084	0.977468		-0.222897	0.974788		0.382752	0.965241		-0.00584817	0.981184		-0.4796	0.917966		0.106554	0.990808		-1.53405	0.932815		-0.343505	0.954987		-0.39176	0.99187		-0.0545384	0.988272		-1.5576	0.957356
-0.0424411	0.98782		0.770034	0.859687		-0.21814	0.971034		-0.0272061	0.980725		1.4575	0.915259		-0.22703	0.894258		-0.735003	0.93183		-0.456793	0.961625		0.0229462	0.978825		-0.202178	0.972938		-0.504318	0.948391		-0.14332	0.988072		-1.47573	0.912256		-0.191299	0.940113		-0.634413	0.990872		-0.285716	0.983329		-1.76119	0.945991
0.297579	0.979753		0.249165	0.875038		0.905585	0.926214		0.0431625	0.974354		1.0484	0.949662		0.237731	0.870254		-0.826014	0.900611		-0.475539	0.961078		0.150888	0.968821		-0.471349	0.971239		0.301283	0.984681		0.112459	0.987944		-1.81563	0.86347		-0.14416	0.956402		-0.449594	0.987598		-0.207229	0.976473		-1.07901	0.945869
0.0918367	0.98207		0.557666	0.885646		1.39591	0.893207		0.557816	0.950602		1.72698	0.920379		0.0204122	0.885817		-0.518319	0.961998		-0.279474	0.95824		-0.370357	0.978418		-0.549248	0.969164		-0.0653209	0.960438		-0.796325	0.977791		-1.32253	0.955433		-0.201088	0.928096		-0.255079	0.987636		2.38412	0.890864		-1.7777	0.935503
0.112784	0.984777		-0.0329241	0.908004		1.18925	0.906415		0.17652	0.968632		0.704975	0.962832		-0.0910828	0.922526		-1.05763	0.828749		-0.0887367	0.956093		0.819556	0.953552		-0.267339	0.969532		-0.227864	0.960599		0.0845589	0.984185		-1.41552	0.947415		-0.155334	0.92836		-0.320048	0.985651		1.9739	0.903371		-0.569036	0.952504
-0.0324566	0.98242		0.197894	0.903144		0.919112	0.938598		0.141685	0.966598		-0.0147894	0.974728		-0.135022	0.959076		-0.767917	0.926021		-0.247757	0.956356		0.275734	0.969838		-0.708087	0.96141		-0.395288	0.930131		-0.353731	0.985759		-1.17688	0.94458		-0.268851	0.905648		-0.292081	0.985019		1.78993	0.913058		-0.801486	0.959107
0.221069	0.972957		-0.515166	0.891294		0.271966	0.97257		0.040936	0.972127		0.367499	0.939715		0.239392	0.952739		-0.803915	0.912318		-0.176856	0.958734		0.359349	0.957093		-0.652981	0.974003		0.0880202	0.982388		-0.159292	0.979665		-1.15465	0.899286		0.106364	0.937851		-0.101523	0.988758		0.293461	0.972382		-1.05261	0.964404
0.153621	0.977343		1.05818	0.836715		-0.491592	0.964639		0.0685377	0.967936		0.450009	0.963496		0.107025	0.970299		-0.0106991	0.980854		0.678305	0.935232		0.395151	0.9545		-0.421753	0.968641		-0.098007	0.952885		1.78381	0.887274		-1.06052	0.933394		-0.0785128	0.964268		-0.314529	0.983646		0.37927	0.968397		-0.0535225	0.969942
0.0854857	0.982789		0.338256	0.88761		0.295392	0.95983		1.14016	0.907536		0.407573	0.968593		-0.452484	0.979554		-0.35736	0.973182		-0.0463687	0.958095		0.14248	0.946896		-0.398837	0.967829		-0.0353564	0.94953		0.38992	0.968042		0.311459	0.956638		-0.245953	0.951577		-0.147488	0.979292		0.0379017	0.976339		0.0487772	0.965007
0.113448	0.975902		0.765379	0.88632		1.62504	0.871694		0.331485	0.949952		-0.101442	0.975829		-0.298725	0.969672		-0.764798	0.91879		0.186114	0.959691		0.168573	0.958993		-0.265339	0.968856		-0.563149	0.874172		0.354251	0.975299		-1.2582	0.948894		0.150563	0.966109		0.104696	0.979455		0.94556	0.947561		-0.158916	0.963666
-0.0495202	0.983132		1.01426	0.825938		0.487163	0.956683		0.405123	0.953734		-0.119752	0.976432		-0.24584	0.952311		-0.558711	0.952191		0.373619	0.952459		0.037911	0.960548		0.236411	0.962844		0.174307	0.973611		0.0284896	0.984795		-1.67322	0.919111			0.936638		-0.125134	0.978631		-0.25948	0.964598		0.0208336	0.950184
-0.0408967	0.976049		0.493941	0.87228		0.503675	0.939098		0.0704971	0.96535		0.178075	0.975734		-0.677499	0.942259		-0.88856	0.899356		0.980189	0.948432		0.705289	0.968083		-0.0581078	0.952554		-0.0115826	0.956247		-0.29407	0.98441		-1.75722	0.907817		-0.346499	0.956377		-0.276903	0.975628		-0.328576	0.971186		0.146581	0.949057
-0.260716	0.974597		0.0630818	0.906392		1.05721	0.888632		0.146532	0.966124		-0.109104	0.976188		0.287437	0.915594		-0.842669	0.870618		0.11154	0.963126		0.31777	0.966937		-0.476734	0.939995		0.13118	0.967822		-0.960964	0.959859		-1.42207	0.93822		0.144668	0.942094		-0.0421734	0.970573		-0.468244	0.962732		0.177357	0.95022
-0.230018	0.971044		0.0542057	0.89939		0.64231	0.942569		0.31799	0.95514		0.970482	0.925731		0.526238	0.904342		-0.32063	0.973807		-0.456283	0.966532		0.414442	0.930426		-1.06279	0.947875		-0.488976	0.877321		0.689988	0.944316		-0.426574	0.946889			0.905657		-0.282043	0.97297		0.801056	0.934037		0.0464796	0.951487
0.0172495	0.963166		-0.345219	0.938226		-0.48749	0.954756		0.0918774	0.966551		0.89761	0.927952		0.0904457	0.948424		-0.773361	0.905623		-0.424295	0.955497		-0.135015	0.949659		-1.1697	0.939083		0.0362808	0.949028		2.11965	0.855639		-0.927927	0.939371		-0.249035	0.944833		-0.080856	0.972174		0.324473	0.968482		-0.145649	0.952892
0.0609302	0.959484		0.242532	0.94718		-0.547627	0.950538		-0.044651	0.968942		0.923855	0.912149		-0.105691	0.940585		-1.38237	0.82866		-0.0850408	0.95004		-0.169194	0.946337		-0.937307	0.932407		-0.22026	0.937811		0.421194	0.940157		-1.72866	0.875532		0.274823	0.96391		0.143398	0.976137		-0.460969	0.948804		0.266243	0.938405
-0.141736	0.956544		1.49201	0.868187		-0.557785	0.94527		-0.00228421	0.966091		2.0247	0.884221		-0.160142	0.943404		-0.170617	0.970377		-0.523265	0.948712		-0.240575	0.945815		-1.22837	0.918428		-0.156765	0.940545		0.31573	0.960301		-1.70173	0.884421		-0.686853	0.898351		-0.256116	0.970092		-0.505183	0.961745		-0.121675	0.940579
3.02153	0.837501		3.05297	0.817613		-0.471772	0.939793		0.118072	0.958667		0.446587	0.948713		0.0854265	0.915288		-0.658662	0.925064		1.33253	0.923899		0.24827	0.94502		-0.763251	0.92081		0.0337637	0.945972		0.314981	0.97514		-1.53248	0.889793		0.732189	0.958923		-0.232453	0.970683		0.69225	0.939134		-0.38506	0.931548
2.83915	0.805492		2.74958	0.828858		-0.430703	0.943513		0.0408447	0.958787		1.55893	0.88964		0.586626	0.855068		-1.05478	0.830457		-0.139657	0.95285		0.246312	0.943819		-0.464987	0.927731		-0.649091	0.883083		0.0757787	0.98183		-1.86449	0.837095		0.114247	0.967681		-0.0442965	0.96574		-0.363752	0.953573		-0.588998	0.942506
1.87261	0.831142		2.03745	0.835846		-0.486933	0.934462		0.547561	0.921277		0.401414	0.931225		0.0746618	0.845641		0.122172	0.954587		-0.0542913	0.937597		-0.0465808	0.941884		-0.327967	0.929514		0.435961	0.951913		0.255911	0.977578		-1.30466	0.907662		0.528024	0.891095		0.0179123	0.967764		-0.285349	0.941854		-0.177371	0.928399
2.42645	0.752394		2.13173	0.697304		2.16627	0.770696		2.22536	0.669627		0.189396	0.815093		1.79391	0.773659		1.97055	0.688155		0.580344	0.794041		1.24317	0.81188		0.982268	0.808064		2.34615	0.726149		0.292343	0.847306		1.95891	0.750483		2.53793	0.738907		0.869047	0.742131		0.712249	0.778199		0.656901	0.80713
2.11338	0.750162		3.16941	0.687782		2.40078	0.761537		2.79734	0.647445		0.295067	0.800522		1.61692	0.776401		1.70423	0.681767		2.6472	0.730695		-0.141312	0.835426		1.17155	0.836178		2.2614	0.728703		-0.0979679	0.866642		0.169783	0.765672		2.6122	0.731441		0.881208	0.741737		2.30112	0.730111		0.844556	0.802912
1.24467	0.772257		2.91343	0.688022		1.80222	0.780315		2.41475	0.654394		1.56402	0.766015		1.16153	0.790557		1.43489	0.677672		0.691898	0.804595		-1.074	0.812897		1.25986	0.830863		2.19042	0.735294		-0.510481	0.860139		-0.15583	0.779873		2.38901	0.761366		1.15488	0.736848		1.97006	0.750236		0.864712	0.799046
1.25452	0.782232		1.96589	0.710567		0.77813	0.787586		1.63812	0.735835		0.967642	0.787936		1.03387	0.78848		1.24703	0.672421		0.348904	0.804239		-0.426001	0.830724		1.44087	0.819831		2.16513	0.750577		-0.039378	0.867783		-0.73785	0.759721		2.31912	0.757152		1.57157	0.735605		1.95947	0.748655		0.83899	0.781347
1.59391	0.77504		0.801251	0.731422		0.214841	0.784572		1.78676	0.72053		1.3383	0.791945		1.24128	0.81088		1.32155	0.668372		0.993053	0.788441		1.43245	0.817941		1.55843	0.820348		2.19461	0.75937		-0.312158	0.867716		-0.648921	0.747397		1.59569	0.773565		1.45964	0.724464		1.82943	0.743214		0.908878	0.797949
1.27859	0.777146		0.777485	0.724193		0.125922	0.782763		1.7716	0.719936		-0.0657732	0.837715		0.466871	0.817356		1.33012	0.670571		1.6931	0.779964		2.79665	0.81455		1.24495	0.817648		1.68421	0.783296		-0.637052	0.85904		-0.978913	0.77725		2.70678	0.76955		0.764571	0.740603		1.53081	0.757092		0.880584	0.801507
1.22611	0.786157		1.09144	0.723704		0.0138778	0.784046		2.70465	0.624709		0.421456	0.803656		1.33512	0.751475		1.26742	0.666952		1.60123	0.783272		2.51254	0.812792		1.36248	0.826739		2.1731	0.760589		0.12021	0.858278		-0.775693	0.770194		2.63573	0.760143		0.355941	0.738152		1.60198	0.752393		0.878928	0.791838
1.15836	0.776554		0.815086	0.732329		0.144078	0.78167		2.44803	0.629876		1.00319	0.798133		0.681471	0.793441		1.28753	0.671119		2.22634	0.76683		1.82395	0.807208		1.58395	0.822604		1.34044	0.784472		-0.283892	0.854647		-0.0241719	0.775072		1.49376	0.736144		0.664646	0.743816		1.57554	0.74924		0.144004	0.822889
1.99905	0.766282		0.888128	0.738003		0.471228	0.814319		2.18036	0.636105		1.50041	0.753423		0.374556	0.811903		1.28143	0.663006		0.629102	0.782034		1.52074	0.809831		1.63622	0.818264		2.12017	0.740111		-1.20827	0.827861		-0.0180028	0.785648		1.76398	0.765621		1.20656	0.733545		1.20279	0.783266		0.288922	0.814557
1.88851	0.749556		0.745218	0.743999		2.41279	0.749924		2.11326	0.630457		0.317339	0.816559		-0.456958	0.810311		1.31774	0.66507		0.562032	0.78605		1.08977	0.812854		1.35054	0.81788		1.23971	0.785366		0.0550018	0.861251		-1.0341	0.745486		1.01765	0.751996		1.13058	0.70437		1.6207	0.744604		0.767157	0.781184
1.29774	0.781135		0.755162	0.744031		1.57909	0.779493		2.11	0.634808		0.553164	0.796041		-0.783041	0.784449		1.29423	0.678067		1.3015	0.762435		0.840002	0.822407		1.3929	0.824823		1.58773	0.778498		-0.161291	0.855128		-0.815392	0.756078		0.816463	0.763487		0.816536	0.703304		1.72705	0.744377		1.06938	0.782006
1.11254	0.791921		1.6965	0.709531		0.096825	0.777425		2.11534	0.63386		2.23606	0.743506		0.3424	0.793461		1.04692	0.670843		1.95068	0.778815		1.48371	0.824729		1.16712	0.806269		1.62532	0.774015		-0.276949	0.854769		-1.13427	0.739299		0.735446	0.761935		1.10033	0.703901		1.82017	0.744209		1.80948	0.769837
1.27837	0.783219		2.26554	0.685231		0.45012	0.801289		2.09279	0.630952		0.441671	0.81136		0.386875	0.795192		1.08709	0.663872		0.373371	0.803188		1.40415	0.818093		1.20939	0.809973		1.47665	0.794595		-1.06071	0.813104		-0.77203	0.748957		1.51283	0.777085		1.39913	0.708213		1.83975	0.735472		1.71131	0.742399
1.2858	0.778219		0.906102	0.710504		0.39491	0.791521		2.01477	0.63371		0.339738	0.822765		-0.364424	0.810749		1.10219	0.660422		0.248182	0.795783		1.58654	0.821925		0.893941	0.811361		1.4068	0.785066		-0.99202	0.827235		-0.896006	0.729471		2.02351	0.766849		1.30255	0.706601		1.80285	0.740936		1.20893	0.757373
1.38084	0.781235		0.605027	0.736321		0.253288	0.776379		2.03653	0.64066		1.42174	0.73476		0.27212	0.819741		1.15136	0.666611		1.60634	0.73985		1.72119	0.824429		0.932362	0.800002		1.95477	0.762309		0.0965308	0.837845		-1.27076	0.713788		1.43638	0.78095		1.3787	0.70098		1.98652	0.736062		1.06459	0.762901
1.43066	0.768342		0.664285	0.737096		0.211528	0.783849		1.96262	0.637457		1.67794	0.78129		0.260158	0.824532		1.13761	0.669281		1.95292	0.758265		1.50048	0.812249		0.979577	0.80265		1.86191	0.778263		1.24697	0.793566		-0.541658	0.749939		1.66689	0.773864		1.44908	0.695637		2.00641	0.723697		0.481558	0.771586
1.25315	0.788942		0.803007	0.744771		0.121819	0.787272		2.05518	0.63791		0.359913	0.812963		0.532111	0.821103		1.23541	0.675922		0.245717	0.794041		1.69112	0.813318		2.3209	0.788984		1.19016	0.788469		0.880857	0.797879		-0.757411	0.724443		1.96513	0.74483		1.00337	0.690975		1.84335	0.730436		-0.681903	0.787958
1.39171	0.784757		0.750419	0.737163		2.64449	0.750048		1.86736	0.631926		0.463028	0.809126		-0.227184	0.824983		1.06804	0.672948		1.01507	0.748294		1.3677	0.797785		2.50606	0.803255		0.867379	0.800385		0.262504	0.840071		-0.454908	0.742422		2.07264	0.756598		0.204375	0.678165		1.82406	0.730497		0.132987	0.777908
1.77583	0.783565		0.727497	0.731862		2.47254	0.75468		1.86039	0.630228		1.66143	0.733046		0.591618	0.825855		1.04372	0.662365		2.21588	0.736673		1.4938	0.805028		2.11033	0.805247		1.18898	0.803245		-0.160426	0.855134		0.478408	0.769638		2.08714	0.770198		0.943053	0.69255		1.64747	0.730309		0.0276649	0.784067
1.99657	0.746036		1.77946	0.692902		1.61759	0.78995		1.83738	0.628494		2.00384	0.736437		0.638557	0.817953		0.990331	0.679669		1.61824	0.750706		1.57706	0.807455		1.42901	0.788054		1.06767	0.792489		0.249532	0.848777		-0.895149	0.762869		1.02627	0.739755		1.12833	0.699556		1.67451	0.740226		-0.43994	0.779242
3.21029	0.695444		2.84848	0.647864		1.23077	0.796641		1.931	0.627797		1.60364	0.775044		-0.666967	0.795829		0.881113	0.661759		0.316013	0.781349		1.83788	0.804587		0.909266	0.791268		0.879786	0.796239		0.0156204	0.856393		-1.20839	0.745327		1.94688	0.762505		0.817241	0.683118		1.68322	0.74253		-0.291831	0.77078
2.90635	0.709758		2.52375	0.634506		0.962302	0.802561		1.82513	0.631053		1.97036	0.741606		0.930648	0.809098		0.978508	0.664025		0.262953	0.787249		1.75682	0.805739		0.576288	0.804427		0.727842	0.805714		-0.40369	0.846645		-1.10877	0.752094		1.5005	0.754088		0.365962	0.656374		1.71744	0.740299		0.194752	0.776034
1.52647	0.748749		1.43347	0.684415		0.254075	0.782516		1.9098	0.639421		0.915501	0.802417		-0.443203	0.79003		1.45792	0.687675		0.722087	0.759555		1.5426	0.809825		0.647089	0.800049		0.799025	0.797838		-1.22387	0.814238		-0.404042	0.767634		1.23508	0.765342		-0.251378	0.649401		1.72121	0.740052		0.0302744	0.79507
1.0824	0.781584		0.831272	0.71487		0.500952	0.78134		1.76524	0.62867		1.51353	0.762688		-1.01275	0.789037		1.78303	0.691448		1.34011	0.757922		1.87286	0.809576		0.685702	0.801357		0.539251	0.794785		-0.0299327	0.835554		-0.900931	0.761585		1.01558	0.735499		-1.96907	0.538805		1.64673	0.735626		-0.31702	0.797914
1.03315	0.785438		0.697419	0.719583		2.34949	0.745564		1.74903	0.630648		3.4724	0.675392		-2.37534	0.763576		1.58837	0.692388		0.463203	0.776355		1.89022	0.808881		0.809225	0.801391		0.711442	0.793998		-0.487287	0.83668		-1.26636	0.727882		1.12036	0.753164		-0.239909	0.62435		1.56808	0.73396		0.147408	0.783935
0.980844	0.794634		0.750892	0.719818		2.62667	0.754751		1.74287	0.630772		2.0168	0.755981		-1.59931	0.793259		1.19044	0.683436		1.55455	0.727733		1.54695	0.794123		0.906494	0.793434		1.21601	0.787311		-0.676956	0.802078		-1.32861	0.731575		0.872559	0.761828		-0.0623129	0.687712		1.53288	0.739766		-0.0732698	0.793431
1.09166	0.795582		1.1209	0.709271		1.31229	0.78271		1.72785	0.635262		0.442232	0.806731		1.03154	0.756991		1.09695	0.666008		1.92825	0.751948		1.76509	0.801119		0.825631	0.794329		1.94735	0.773106		-0.109249	0.846562		-1.28703	0.726302		0.607794	0.77097		0.123561	0.691234		1.5684	0.741005		0.541417	0.774435
2.1658	0.753503		0.772178	0.735063		0.412494	0.775035		1.78645	0.630887		0.360614	0.816295		0.433911	0.751755		1.2186	0.665123		0.570858	0.778311		1.78711	0.781106		1.18693	0.786956		2.04219	0.760225		-0.458489	0.836517		-0.863066	0.755619		0.707175	0.753967		-0.266942	0.686134		1.61878	0.737484		0.233025	0.794903
1.63577	0.751221		1.55451	0.699414		0.114653	0.769438		1.81382	0.626394		0.665998	0.81528		-0.0433105	0.771039		1.28895	0.666697		0.121786	0.791234		1.74638	0.774625		-0.307268	0.789087		1.8868	0.766288		-1.00625	0.811436		0.700103	0.757166		0.532879	0.744069		-0.134314	0.674978		1.79843	0.74559		0.197359	0.776843
1.10938	0.777842		1.44698	0.664547		0.37277	0.774446		1.67144	0.63115		0.532069	0.813743		-0.551611	0.810609		1.27493	0.663158		0.641422	0.765153		1.91802	0.79131		-0.19506	0.791564		1.90697	0.758898		0.100064	0.829492		0.431444	0.771785		0.550475	0.752897		-0.396226	0.698138		1.76839	0.75359		0.119952	0.795358
0.702568	0.944557		0.719072	0.909359		0.214114	0.967909		1.78336	0.797293		-1.39515	0.950334		0.0222734	0.939765		0.124623	0.978487		0.872577	0.854349		1.34352	0.939356		0.653601	0.947934		0.200278	0.978572		-0.0797056	0.978862		0.0226746	0.960446		-0.0506139	0.926828		0.26946	0.965691		1.75543	0.87499		1.05685	0.940256
0.336519	0.965888		0.738241	0.893138		-0.369199	0.970296		1.99728	0.826394		-0.318858	0.983098		0.539305	0.976878		-0.0231492	0.985117		0.473423	0.786324		1.2267	0.961861		0.0958792	0.971448		0.068401	0.985942		1.55983	0.921077		0.0213663	0.974629		-0.0573783	0.946285		0.244793	0.981728		2.75999	0.879735		1.66223	0.892143
0.016831	0.969973		0.384491	0.962042		-1.31437	0.89015		1.74268	0.858591		-1.33746	0.942289		0.355406	0.975567		-0.195904	0.973703		0.00550103	0.759361		0.881218	0.967908		0.320807	0.978632		0.224134	0.982245		0.0634823	0.97524		0.224564	0.961781		0.265281	0.964206		0.146609	0.9816		2.68171	0.893941		1.52256	0.919672
-0.0793727	0.967761		0.391685	0.96472		-0.541131	0.976902		1.81399	0.836157		-1.49912	0.932082		-0.649803	0.954988		-0.18879	0.972828		-0.000501185	0.757267		0.407161	0.960076		-0.0482225	0.981748		0.074228	0.989		1.4611	0.906122		0.114358	0.966101		0.0002415	0.975786		0.275304	0.985173		2.39263	0.898665		0.679403	0.977155
0.0727017	0.982231		0.0796615	0.984001		-0.734315	0.974945		1.29194	0.918472		-1.62764	0.906316		0.306774	0.984574		-0.100416	0.980452		-0.0997518	0.79873		0.13341	0.965198		-0.345013	0.983488		-0.0972396	0.989233		0.518318	0.950157		0.193916	0.962531		-0.302496	0.921268		0.374865	0.987332		1.04496	0.953219		-0.602888	0.980172
0.0294471	0.985263		0.180478	0.973065		-0.439061	0.982908		0.432721	0.962983		-0.599712	0.980561		-0.33327	0.970258		-0.628494	0.906033		-0.253627	0.858958		0.260382	0.972619		-0.254347	0.987704		0.130429	0.989099		-0.349608	0.979582		0.466117	0.965156		-0.264755	0.915109		0.135986	0.990776		0.250975	0.964263		1.42527	0.92518
0.229658	0.986832		0.664394	0.932229		-1.22179	0.939217		0.132455	0.979161		-1.29746	0.941105		0.317862	0.97696		-0.11859	0.968559		0.19876	0.905604		0.0345325	0.958643		-0.0384653	0.988245		-0.27079	0.984807		-0.289375	0.983056		1.14926	0.936618		-0.170342	0.951431		0.105028	0.99372		0.0746332	0.976502		1.35928	0.939294
-0.00239368	0.988316		0.722363	0.936533		-0.456504	0.98672		0.0854225	0.984503		-2.03209	0.918701		0.188045	0.985691		0.560532	0.968406		1.77906	0.910769		-0.0711466	0.974584		-0.14266	0.987063		-0.550756	0.970812		-0.43564	0.987707		1.71527	0.934356		-0.152213	0.922134		0.17981	0.994699		0.49607	0.962018		1.41112	0.907951
-0.169753	0.985141		0.273703	0.983498		-1.66753	0.890032		0.0423829	0.990579		-2.02283	0.892175		-0.187504	0.971928		0.43786	0.981856		0.132785	0.982158		-0.570644	0.964672		-0.116768	0.992132		0.108203	0.975517		-0.678673	0.96103		1.52019	0.937325		-0.0531313	0.977523		0.545083	0.993222		0.253048	0.982603		0.64904	0.979069
0			0			0			0			0			0			0			0			0			0			0			0			0			0			0			0			0
-0.2195	0.985465		0.359096	0.929517		-1.05105	0.940231		0.279227	0.976919		-1.45287	0.92972		-0.218322	0.98392		0.114776	0.99267		-0.0901119	0.988887		-0.187891	0.990616		-0.122616	0.987141		-0.371397	0.973807		-0.572119	0.971484		-0.013866	0.985387		-0.396636	0.946836		0.153324	0.994086		0.19851	0.984307		-0.908559	0.983397
-0.212194	0.99129		1.04374	0.808116		-1.88567	0.817003		0.0151768	0.985371		-0.565335	0.983554		-0.414534	0.954643		-0.297143	0.969981		-0.324008	0.97809		-0.547697	0.975986		-0.318946	0.978584		-0.396115	0.983521		-0.821993	0.956497		0.0444575	0.978453		-0.244431	0.928629		-0.08933	0.99378		-0.032668	0.988792		-1.11215	0.975854
0.127826	0.986395		0.522868	0.837488		-0.761945	0.979248		0.0855454	0.976133		-0.974428	0.963752		0.0502268	0.939651		-0.388154	0.944454		-0.342753	0.978083		-0.419756	0.982344		-0.588117	0.977058		0.409487	0.961568		-0.566214	0.976606		-0.295442	0.963154		-0.197292	0.941575		0.0954891	0.991382		0.0458195	0.982119		-0.429972	0.972717
-0.0779166	0.986078		0.831369	0.839578		-0.271625	0.986289		0.600199	0.94852		-0.295847	0.980993		-0.167092	0.949129		-0.0804593	0.978561		-0.146689	0.97782		-0.941	0.948151		-0.666016	0.976834		0.0428825	0.990719		-1.475	0.914693		0.197656	0.966725		-0.25422	0.911399		0.290005	0.991916		2.63716	0.88249		-1.12866	0.964144
-0.0569692	0.985712		0.240779	0.899725		-0.478278	0.980083		0.218903	0.967281		-1.31786	0.936307		-0.278587	0.97125		-0.619773	0.877888		0.0440485	0.974646		0.248913	0.986846		-0.384107	0.974449		-0.119661	0.987928		-0.594114	0.969838		0.104667	0.968819		-0.208466	0.916182		0.225035	0.989153		2.22695	0.879471		0.0800039	0.970975
-0.20221	0.982506		0.471597	0.887811		-0.748418	0.962786		0.184068	0.96292		-2.03762	0.894104		-0.322526	0.986511		-0.330057	0.953117		-0.114972	0.974453		-0.29491	0.981609		-0.824855	0.969671		-0.287085	0.978297		-1.0324	0.958474		0.343302	0.956436		-0.321982	0.900039		0.253002	0.989742		2.04298	0.891709		-0.152446	0.97372
0.0513161	0.979872		-0.241463	0.895714		-1.39556	0.916945		0.0833189	0.971923		-1.65533	0.966011		0.0518884	0.98196		-0.366055	0.94909		-0.0440708	0.97616		-0.211295	0.980299		-0.769749	0.977304		0.196224	0.980488		-0.837965	0.967811		0.365538	0.959209		0.0532332	0.948746		0.443561	0.990134		0.546509	0.960324		-0.403572	0.977527
-0.0161322	0.981424		1.33188	0.779561		-2.15912	0.803629		0.110921	0.967618		-1.57282	0.934675		-0.0804791	0.973847		0.427161	0.961886		0.811091	0.952451		-0.175493	0.977416		-0.538521	0.972408		0.0101963	0.987707		1.10514	0.939644		0.459662	0.95027		-0.131644	0.967289		0.230554	0.988235		0.632318	0.955896		0.595517	0.962423
-0.0842676	0.97973		0.611959	0.854335		-1.37214	0.93343		1.18255	0.90564		-1.61526	0.922228		-0.639988	0.95704		0.0804999	0.979038		0.0864166	0.970616		-0.428164	0.976603		-0.515605	0.971713		0.072847	0.978969		-0.288753	0.97986		1.83164	0.905871		-0.299084	0.940371		0.397595	0.984498		0.29095	0.971599		0.697817	0.957404
-0.0563048	0.98335		1.03908	0.840656		-0.0424909	0.9847		0.373868	0.951398		-2.12427	0.89041		-0.486229	0.937918		-0.326938	0.960684		0.318899	0.972404		-0.402071	0.97186		-0.382107	0.97309		-0.454946	0.942313		-0.324422	0.97979		0.261991	0.947735		0.0974319	0.965782		0.649779	0.982229		1.19861	0.930779		0.490123	0.957314
-0.219274	0.974765		1.28796	0.767591		-1.18037	0.925241		0.447506	0.950166		-2.14258	0.893588		-0.433344	0.931317		-0.120851	0.97662		0.506405	0.95643		-0.532733	0.969275		0.119643	0.969446		0.282511	0.966571		-0.650183	0.957135		-0.153038	0.966676			0.923478		0.41995	0.982769		-0.00643178	0.97582		0.669873	0.930634
-0.21065	0.978124		0.767644	0.834147		-1.16385	0.95108		0.11288	0.964607		-1.84476	0.901593		-0.865003	0.907439		-0.450701	0.935344		1.11297	0.936257		0.134645	0.957043		-0.174876	0.957576		0.0966208	0.978227		-0.972742	0.937893		-0.237034	0.966239		-0.39963	0.94454		0.26818	0.980555		-0.075528	0.974264		0.79562	0.926002
-0.430469	0.974814		0.336785	0.893216		-0.610322	0.982041		0.188915	0.964587		-2.13193	0.887713		0.0999328	0.912522		-0.404809	0.919163		0.244325	0.954621		-0.252873	0.959692		-0.593502	0.944791		0.239383	0.967432		-1.63964	0.880589		0.0981156	0.948466		0.091537	0.927759		0.50291	0.978022		-0.215196	0.974047		0.826396	0.928393
-0.399771	0.966566		0.327909	0.87667		-1.02522	0.94646		0.360372	0.952407		-1.05235	0.968871		0.338734	0.908613		0.117229	0.965852		-0.323498	0.97206		-0.156201	0.964191		-1.17956	0.951398		-0.380773	0.944948		0.0113155	0.948994		1.09361	0.908176			0.893397		0.263041	0.976942		1.0541	0.921029		0.695519	0.926736
-0.152504	0.965506		-0.0715162	0.948029		-2.15502	0.784005		0.13426	0.964418		-1.12522	0.93987		-0.0970582	0.939953		-0.335502	0.947932		-0.29151	0.969654		-0.705658	0.963276		-1.28647	0.944074		0.144484	0.967743		1.44098	0.907962		0.592259	0.950576		-0.302166	0.936207		0.464227	0.976805		0.577521	0.956067		0.503391	0.950451
-0.108823	0.95999		0.516235	0.910314		-2.21516	0.781536		-0.00226814	0.967529		-1.09898	0.966509		-0.293195	0.930253		-0.944508	0.873162		0.0477445	0.962563		-0.739837	0.963401		-1.05408	0.940825		-0.112057	0.968448		-0.257479	0.972877		-0.208476	0.955539		0.221691	0.964727		0.688482	0.977466		-0.20792	0.973401		0.915283	0.918956
-0.311489	0.946789		1.76571	0.814403		-2.22531	0.78193		0.0400986	0.963976		0.00186775	0.973798		-0.347646	0.928659		0.267243	0.957916		-0.390479	0.956707		-0.811218	0.962066		-1.34514	0.925759		-0.0485614	0.972894		-0.362942	0.979269		-0.181543	0.948468		-0.739984	0.885455		0.288968	0.974916		-0.252134	0.973046		0.527364	0.924323
2.85177	0.81741		3.32668	0.773019		-2.1393	0.783335		0.160455	0.952076		-1.57624	0.929451		-0.102077	0.952543		-0.220802	0.957928		1.46532	0.920348		-0.322374	0.962824		-0.880019	0.926886		0.141967	0.969803		-0.363692	0.973979		-0.0122956	0.948189		0.679057	0.938638		0.312631	0.974708		0.945298	0.915133		0.26398	0.91355
2.6694	0.795514		3.02328	0.788719		-2.09823	0.802026		0.0832276	0.957268		-0.463896	0.970233		0.399122	0.923462		-0.61692	0.878916		-0.00687175	0.928182		-0.324331	0.962325		-0.581755	0.933966		-0.540888	0.945086		-0.602894	0.950074		-0.3443	0.929692		0.0611162	0.966052		0.500787	0.97225		-0.110704	0.968173		0.0600422	0.937667
1.70285	0.833849		2.31115	0.784359		-2.15446	0.771292		0.589944	0.918441		-1.62142	0.927079		-0.112842	0.908023		0.560032	0.934712		0.0784939	0.911795		-0.617224	0.959072		-0.444735	0.935913		0.544165	0.934642		-0.422762	0.966288		0.215524	0.92609		0.474893	0.87352		0.562996	0.971277		-0.0323007	0.965816		0.471669	0.909358
2.2567	0.741635		2.40543	0.658977		0.498739	0.845621		2.26775	0.674899		-1.83343	0.842542		1.6064	0.830221		2.40841	0.687964		0.713129	0.8136		0.672528	0.796938		0.8655	0.821299		2.45436	0.728636		-0.38633	0.858355		3.47909	0.677184		2.48479	0.724491		1.41413	0.744766		0.965298	0.789325		1.30594	0.782366
1.94362	0.746027		3.44311	0.656273		0.733255	0.844709		2.83972	0.652869		-1.72776	0.868243		1.42941	0.838745		2.14209	0.681919		2.77999	0.752731		-0.711956	0.810486		1.05479	0.84602		2.36961	0.735259		-0.776641	0.842782		1.68997	0.703559		2.55907	0.719074		1.42629	0.74235		2.55416	0.735123		1.4936	0.760203
1.07492	0.77929		3.18713	0.651209		0.134687	0.832578		2.45713	0.659694		-0.458813	0.884031		0.97403	0.845723		1.87275	0.678859		0.824683	0.814741		-1.64464	0.768264		1.14309	0.843689		2.29862	0.739561		-1.18915	0.799479		1.36436	0.722807		2.33588	0.752325		1.69996	0.734671		2.22311	0.75301		1.51375	0.756766
1.08477	0.788389		2.23959	0.663481		-0.889399	0.733404		1.6805	0.740459		-1.05519	0.874367		0.846367	0.839585		1.68489	0.673885		0.481689	0.821175		-0.996645	0.803819		1.3241	0.836163		2.27333	0.752917		-0.718051	0.850156		0.782336	0.728519		2.26599	0.753815		2.11666	0.731204		2.21252	0.753055		1.48803	0.736475
1.42416	0.778151		1.07495	0.691751		-1.45269	0.678276		1.82914	0.725459		-0.684527	0.864202		1.05378	0.845078		1.75941	0.669574		1.12584	0.810911		0.861802	0.830184		1.44167	0.834252		2.30281	0.7604		-0.990831	0.827854		0.871265	0.724107		1.54256	0.778769		2.00472	0.718471		2.08248	0.744475		1.55792	0.75916
1.10883	0.782204		1.05119	0.681107		-1.54161	0.672863		1.81398	0.722934		-2.0886	0.814609		0.279367	0.818704		1.76798	0.671392		1.82589	0.797216		2.22601	0.831607		1.12818	0.831914		1.79241	0.77903		-1.31573	0.801886		0.541272	0.766318		2.65365	0.758824		1.30965	0.740345		1.78386	0.756373		1.52962	0.766718
1.05635	0.792378		1.36514	0.682636		-1.65365	0.665557		2.74703	0.632568		-1.60137	0.876381		1.14762	0.823016		1.70528	0.667647		1.73402	0.805205		1.94189	0.837621		1.24571	0.840945		2.2813	0.758885		-0.558463	0.863805		0.744493	0.750352		2.5826	0.749168		0.901025	0.739883		1.85503	0.752013		1.52797	0.749659
0.988603	0.785861		1.08879	0.695338		-1.52345	0.674445		2.49041	0.637271		-1.01964	0.863605		0.493967	0.793954		1.72539	0.67148		2.35912	0.782502		1.2533	0.838703		1.46718	0.838681		1.44864	0.782504		-0.962565	0.795719		1.49601	0.727517		1.44063	0.747852		1.20973	0.744017		1.82859	0.750225		0.793044	0.812523
1.8293	0.758309		1.16183	0.704243		-1.1963	0.763178		2.22274	0.642208		-0.522423	0.877746		0.187052	0.836752		1.71929	0.66458		0.761887	0.792524		0.950099	0.831523		1.51946	0.835207		2.22838	0.739993		-1.88695	0.744037		1.50218	0.719325		1.71085	0.764819		1.75164	0.730867		1.45583	0.783786		0.937962	0.802674
1.71875	0.748852		1.01892	0.71302		0.745265	0.851013		2.15565	0.635455		-1.70549	0.829724		-0.644462	0.816091		1.7556	0.666423		0.694817	0.80152		0.519129	0.841834		1.23377	0.830209		1.34791	0.779939		-0.623671	0.83559		0.486088	0.747104		0.964516	0.76553		1.67566	0.698533		1.87375	0.747543		1.4162	0.757579
1.12798	0.785413		1.02887	0.710407		-0.0884379	0.825027		2.15239	0.638284		-1.46967	0.863948		-0.970545	0.814632		1.73209	0.676605		1.43428	0.784808		0.269359	0.841531		1.27613	0.836106		1.69593	0.772946		-0.839963	0.822681		0.704794	0.736444		0.763332	0.773314		1.36162	0.698454		1.98009	0.746774		1.71842	0.753216
0.94279	0.793795		1.97021	0.670203		-1.5707	0.663394		2.15772	0.639888		0.213234	0.87366		0.154896	0.834027		1.48478	0.671237		2.08347	0.792607		0.913069	0.842412		1.05035	0.823083		1.73352	0.770337		-0.955621	0.821695		0.385914	0.730404		0.682315	0.771755		1.64542	0.705272		2.07322	0.746311		2.45852	0.754635
1.10861	0.788498		2.53924	0.640244		-1.21741	0.727183		2.13517	0.635833		-1.58116	0.840577		0.199371	0.830281		1.52495	0.664344		0.506157	0.814818		0.833508	0.837487		1.09262	0.825433		1.58485	0.785081		-1.73938	0.729784		0.748156	0.726913		1.4597	0.766104		1.94421	0.707418		2.0928	0.7419		2.36035	0.710243
1.11605	0.782593		1.17981	0.672262		-1.27262	0.706831		2.05716	0.638341		-1.68309	0.83854		-0.551928	0.800924		1.54005	0.661301		0.380967	0.808528		1.01589	0.84117		0.777173	0.826607		1.515	0.782148		-1.67069	0.753874		0.62418	0.718271		1.97038	0.75592		1.84764	0.707473		2.05589	0.743596		1.85797	0.725041
1.21108	0.782974		0.87873	0.702924		-1.41424	0.679294		2.07891	0.64559		-0.601093	0.878115		0.084616	0.833111		1.58922	0.665674		1.73912	0.762482		1.15054	0.840226		0.815594	0.818077		2.06298	0.766343		-0.582142	0.836806		0.249425	0.722467		1.38325	0.783142		1.92379	0.701696		2.23957	0.741565		1.71363	0.736506
1.26091	0.773091		0.937988	0.704504		-1.456	0.681149		2.005	0.644692		-0.344893	0.860228		0.0726539	0.830943		1.57547	0.668663		2.0857	0.773867		0.929838	0.836313		0.862809	0.818444		1.97012	0.781986		0.568294	0.812996		0.978528	0.697421		1.61376	0.767196		1.99416	0.694236		2.25945	0.735317		1.1306	0.741463
1.0834	0.794053		1.07671	0.713328		-1.54571	0.705858		2.09756	0.64344		-1.66292	0.813932		0.344607	0.842581		1.67327	0.672902		0.378502	0.806988		1.12048	0.836166		2.20413	0.803656		1.29836	0.794477		0.202184	0.842428		0.762775	0.721604		1.912	0.736196		1.54846	0.688382		2.0964	0.738957		-0.0328628	0.798481
1.22196	0.79094		1.02412	0.706749		0.976962	0.857533		1.90975	0.63666		-1.5598	0.831574		-0.414688	0.813022		1.5059	0.670431		1.14785	0.773032		0.797056	0.829103		2.38929	0.816349		0.975582	0.80214		-0.416168	0.852409		1.06528	0.69811		2.01951	0.747817		0.749458	0.675641		2.0771	0.738219		0.782027	0.760841
1.60608	0.778265		1.0012	0.70076		0.805005	0.852736		1.90277	0.632717		-0.361401	0.865659		0.404114	0.824524		1.48158	0.660003		2.34867	0.753643		0.923156	0.826361		1.99356	0.819991		1.29718	0.799204		-0.839099	0.831297		1.99859	0.681166		2.034	0.762401		1.48814	0.69358		1.90052	0.732504		0.676705	0.772431
1.82682	0.739259		2.05316	0.656241		-0.0499383	0.837548		1.87976	0.634076		-0.0189872	0.858228		0.451053	0.816264		1.42819	0.676082		1.75102	0.763489		1.00641	0.822868		1.31224	0.799599		1.17587	0.783921		-0.429141	0.866703		0.625037	0.710607		0.973134	0.750407		1.67341	0.698376		1.92755	0.74084		0.2091	0.77849
3.04054	0.667068		3.12218	0.611487		-0.43676	0.8141		1.97338	0.634408		-0.41919	0.845391		-0.854471	0.750577		1.31897	0.659332		0.448799	0.79536		1.26723	0.819082		0.792498	0.801687		0.987989	0.79907		-0.663052	0.839027		0.311795	0.722234		1.89375	0.752149		1.36232	0.677764		1.93627	0.741472		0.357209	0.757255
2.73659	0.688495		2.79746	0.593211		-0.705227	0.801066		1.86751	0.63519		-0.0524748	0.8572		0.743144	0.831859		1.41637	0.663443		0.395738	0.802786		1.18618	0.820442		0.45952	0.817555		0.836045	0.807936		-1.08236	0.804147		0.411419	0.721489		1.44737	0.754892		0.911045	0.653419		1.97049	0.740217		0.843792	0.769257
1.35672	0.75113		1.70717	0.640436		-1.41346	0.683716		1.95218	0.644686		-1.10733	0.819135		-0.630707	0.744002		1.89578	0.683231		0.854872	0.77813		0.971957	0.826663		0.530321	0.813339		0.907229	0.795373		-1.90254	0.734069		1.11614	0.704579		1.18195	0.77051		0.293705	0.647951		1.97425	0.740667		0.679314	0.784555
0.912651	0.780505		1.10498	0.679664		-1.16658	0.707171		1.80762	0.633067		-0.509295	0.86194		-1.20026	0.750069		2.22089	0.688494		1.47289	0.772637		1.30222	0.825389		0.568934	0.811886		0.647454	0.794645		-0.708605	0.812266		0.619254	0.729598		0.962444	0.744159		-1.42399	0.529945		1.89977	0.737022		0.33202	0.794072
0.8634	0.78334		0.971122	0.684967		0.681963	0.849876		1.79141	0.635709		1.44957	0.842528		-2.56284	0.727823		2.02623	0.6862		0.595988	0.788627		1.31958	0.831952		0.692457	0.81431		0.819645	0.785744		-1.16596	0.784998		0.253822	0.726385		1.06723	0.756815		0.305174	0.61318		1.82113	0.735501		0.796447	0.760959
0.81109	0.789667		1.0246	0.683907		0.959143	0.854445		1.78525	0.635595		-0.00602649	0.836831		-1.78681	0.821929		1.6283	0.681213		1.68734	0.746397		0.976308	0.826294		0.789726	0.809437		1.32421	0.779395		-1.35563	0.723678		0.191578	0.71605		0.819427	0.772167		0.48277	0.681595		1.78593	0.739858		0.57577	0.789034
0.921904	0.792461		1.3946	0.670544		-0.355235	0.792873		1.77023	0.639369		-1.5806	0.784623		0.844038	0.827149		1.53481	0.66752		2.06103	0.767799		1.19444	0.828568		0.708863	0.808407		2.05555	0.776324		-0.787922	0.809996		0.233158	0.711548		0.554662	0.777813		0.668644	0.689154		1.82145	0.742423		1.19046	0.750141
1.99605	0.744171		1.04588	0.706825		-1.25504	0.690712		1.82883	0.635705		-1.66222	0.786065		0.246407	0.81509		1.65646	0.665137		0.703643	0.793212		1.21647	0.820071		1.07017	0.800733		2.15039	0.767064		-1.13716	0.779445		0.65712	0.709261		0.654044	0.761439		0.278141	0.682681		1.87183	0.736817		0.882065	0.773513
1.46601	0.749534		1.82821	0.665881		-1.55288	0.662443		1.8562	0.630382		-1.35683	0.802191		-0.230814	0.822802		1.7268	0.6666		0.254571	0.805252		1.17573	0.812932		-0.424036	0.805498		1.995	0.771445		-1.68493	0.752383		2.22029	0.658489		0.479748	0.751823		0.410769	0.668718		2.05148	0.74906		0.846398	0.751586
0.939622	0.778869		1.72068	0.618981		-1.29476	0.67983		1.71383	0.635629		-1.49076	0.793495		-0.739115	0.819042		1.71279	0.662396		0.774207	0.787256		1.34738	0.820207		-0.311828	0.806702		2.01517	0.767985		-0.578608	0.833356		1.95163	0.689097		0.497344	0.76055		0.148858	0.695743		2.02144	0.751223		0.768992	0.781388
0.922068	0.929288		0.359976	0.927435		1.26517	0.925758		1.50413	0.831982		0.0577131	0.956168		0.240595	0.954238		0.00984643	0.980595		0.962689	0.838435		1.53141	0.935309		0.776218	0.939908		0.571675	0.945087		0.492413	0.969541		0.0365405	0.969604		0.346022	0.957457		0.116137	0.96763		1.55692	0.872434		1.96541	0.912753
0.556019	0.952741		0.379145	0.922084		0.681854	0.950904		1.71805	0.863116		1.13401	0.935637		0.757627	0.972419		-0.137925	0.981669		0.563535	0.765139		1.41459	0.962642		0.218495	0.958903		0.439798	0.96973		2.13195	0.885642		0.0352322	0.978266		0.339258	0.963763		0.0914689	0.98117		2.56148	0.889056		2.57079	0.860549
0.236331	0.964413		0.0253953	0.938126		-0.263316	0.969754		1.46345	0.893213		0.115403	0.982753		0.573727	0.959241		-0.31068	0.970663		0.0956129	0.735332		1.06911	0.97035		0.443423	0.967518		0.595531	0.941063		0.635601	0.941132		0.23843	0.971552		0.661917	0.89281		-0.00671476	0.981483		2.4832	0.899325		2.43112	0.885014
0.140127	0.969474		0.0325899	0.944582		0.509922	0.962107		1.53477	0.87337		-0.0462514	0.980316		-0.431481	0.938101		-0.303567	0.971896		0.0896107	0.734695		0.595052	0.961204		0.0743937	0.970861		0.445625	0.969228		2.03322	0.880099		0.128224	0.978718		0.396878	0.902295		0.12198	0.984175		2.19412	0.90681		1.58796	0.960918
0.292202	0.96979		-0.279434	0.933768		0.316737	0.966632		1.01271	0.941735		-0.174771	0.97919		0.525095	0.968838		-0.215193	0.978796		-0.00963988	0.780097		0.321301	0.963672		-0.222397	0.974615		0.274157	0.963799		1.09044	0.91528		0.207782	0.975815		0.0941408	0.978422		0.221541	0.986076		0.846454	0.958482		0.305671	0.981146
0.248947	0.975395		-0.178618	0.949758		0.611991	0.964129		0.153495	0.968834		0.853154	0.937166		-0.114949	0.949373		-0.74327	0.905148		-0.163515	0.844856		0.448273	0.97173		-0.131731	0.974868		0.501826	0.953277		0.22251	0.959333		0.479983	0.974983		0.131881	0.981165		-0.0173379	0.989097		0.0524655	0.966683		2.33383	0.888377
0.449158	0.977136		0.305298	0.946806		-0.170735	0.981122		-0.146771	0.970383		0.155408	0.983679		0.536183	0.958585		-0.233366	0.962853		0.288872	0.886821		0.222424	0.958278		0.0841509	0.981197		0.100607	0.991088		0.282744	0.984769		1.16313	0.943608		0.226294	0.975353		-0.0482957	0.991755		-0.123877	0.977626		2.26784	0.903682
0.217106	0.984505		0.363267	0.940522		0.594548	0.952668		-0.193804	0.976718		-0.579221	0.975108		0.406367	0.968679		0.445756	0.966507		1.86917	0.893626		0.116745	0.972323		-0.0200435	0.973363		-0.179359	0.993659		0.136479	0.980809		1.72913	0.938596		0.244423	0.981412		0.0264864	0.991769		0.29756	0.972752		2.31968	0.871576
0.0497467	0.986311		-0.0853923	0.953869		-0.616477	0.959231		-0.236844	0.976847		-0.569964	0.973668		0.0308177	0.955127		0.323084	0.977468		0.222897	0.974788		-0.382752	0.965241		0.00584817	0.981184		0.4796	0.917966		-0.106554	0.990808		1.53405	0.932815		0.343505	0.954987		0.39176	0.99187		0.0545384	0.988272		1.5576	0.957356
0.2195	0.985465		-0.359096	0.929517		1.05105	0.940231		-0.279227	0.976919		1.45287	0.92972		0.218322	0.98392		-0.114776	0.99267		0.0901119	0.988887		0.187891	0.990616		0.122616	0.987141		0.371397	0.973807		0.572119	0.971484		0.013866	0.985387		0.396636	0.946836		-0.153324	0.994086		-0.19851	0.984307		0.908559	0.983397
0			0			0			0			0			0			0			0			0			0			0			0			0			0			0			0			0
0.00730564	0.990105		0.684642	0.93002		-0.834618	0.925888		-0.26405	0.986107		0.887531	0.95131		-0.196212	0.975255		-0.41192	0.971105		-0.233896	0.984813		-0.359806	0.981065		-0.196329	0.993638		-0.0247176	0.985095		-0.249874	0.988089		0.0583235	0.98888		0.152206	0.989999		-0.242654	0.995518		-0.231178	0.987317		-0.203593	0.98762
0.347326	0.975594		0.163773	0.945076		0.289108	0.953307		-0.193681	0.988547		0.478438	0.979628		0.268548	0.964522		-0.50293	0.94275		-0.252641	0.986262		-0.231864	0.98365		-0.465501	0.991786		0.780884	0.890826		0.00590517	0.99002		-0.281576	0.967588		0.199345	0.983675		-0.0578346	0.992826		-0.15269	0.982228		0.478586	0.97237
0.141583	0.983377		0.472274	0.957013		0.779428	0.950762		0.320973	0.980386		1.15702	0.956419		0.0512299	0.971787		-0.195236	0.979832		-0.056577	0.98541		-0.753109	0.953991		-0.5434	0.988896		0.414279	0.975248		-0.902879	0.969595		0.211522	0.973394		0.142417	0.982261		0.136681	0.99267		2.43865	0.884959		-0.220101	0.964042
0.162531	0.987905		-0.118316	0.954043		0.572774	0.959195		-0.0603238	0.984618		0.135011	0.986157		-0.0602651	0.983682		-0.734549	0.878585		0.13416	0.981721		0.436804	0.987626		-0.26149	0.984463		0.251736	0.976821		-0.0219952	0.985613		0.118533	0.969952		0.188171	0.982853		0.0717117	0.99137		2.02844	0.896558		0.988563	0.954031
0.0172901	0.985639		0.112502	0.961217		0.302635	0.976771		-0.0951583	0.9739		-0.584753	0.973997		-0.104204	0.987894		-0.444833	0.953106		-0.0248601	0.982886		-0.107018	0.984465		-0.702239	0.980875		0.084312	0.988391		-0.460285	0.985959		0.357168	0.968131		0.0746544	0.962039		0.0996782	0.990422		1.84447	0.90582		0.756112	0.960107
0.270816	0.973933		-0.600559	0.942247		-0.344511	0.976075		-0.195908	0.969837		-0.202465	0.957271		0.27021	0.971331		-0.480832	0.952132		0.0460411	0.982381		-0.0234033	0.985073		-0.647133	0.974661		0.56762	0.936643		-0.265846	0.985144		0.379404	0.969641		0.44987	0.866085		0.290237	0.99066		0.347999	0.969451		0.504986	0.959168
0.203368	0.976125		0.972787	0.930685		-1.10807	0.908937		-0.168306	0.976047		-0.119955	0.977646		0.137843	0.959643		0.312384	0.96159		0.901203	0.955032		0.0123984	0.981148		-0.415905	0.963462		0.381593	0.979976		1.67726	0.89766		0.473528	0.961215		0.264992	0.976219		0.0772308	0.988453		0.433809	0.965461		1.50408	0.936676
0.135232	0.980877		0.252864	0.953544		-0.321085	0.951943		0.90332	0.940517		-0.16239	0.982192		-0.421667	0.945329		-0.0342763	0.982701		0.176528	0.97482		-0.240272	0.980469		-0.392989	0.960952		0.444244	0.975191		0.283366	0.975773		1.84551	0.911938		0.0975523	0.981714		0.244272	0.985706		0.0924401	0.974037		1.60638	0.930624
0.163195	0.978219		0.679987	0.951796		1.00856	0.930847		0.0946416	0.963406		-0.671406	0.971804		-0.267907	0.921918		-0.441714	0.96053		0.409011	0.967619		-0.21418	0.97893		-0.259491	0.967136		-0.083549	0.981053		0.247697	0.981978		0.275857	0.949838		0.494068	0.973189		0.496455	0.985892		1.0001	0.940739		1.39868	0.927698
0.000226474	0.981083		0.928866	0.909848		-0.129314	0.979928		0.16828	0.968969		-0.689716	0.968627		-0.215022	0.912655		-0.235627	0.978982		0.596517	0.946693		-0.344841	0.975168		0.242259	0.95966		0.653908	0.924039		-0.0780645	0.983211		-0.139172	0.967321			0.981924		0.266626	0.984829		-0.204942	0.97189		1.57843	0.896948
0.00884999	0.979474		0.408549	0.930594		-0.112802	0.969893		-0.166347	0.959822		-0.391889	0.970369		-0.646682	0.889395		-0.565477	0.935228		1.20309	0.930963		0.322537	0.959352		-0.0522597	0.948705		0.468018	0.962014		-0.400624	0.977967		-0.223168	0.972497		-0.00299358	0.975974		0.114856	0.981268		-0.274038	0.976545		1.70418	0.890939
-0.210969	0.977302		-0.0223105	0.952397		0.44073	0.940149		-0.0903117	0.964951		-0.679067	0.966013		0.318254	0.879175		-0.519585	0.919866		0.334437	0.95499		-0.064982	0.96495		-0.470886	0.936929		0.61078	0.928198		-1.06752	0.94382		0.111982	0.962495		0.488173	0.982944		0.349586	0.978183		-0.413706	0.972112		1.73496	0.89531
-0.180271	0.976557		-0.0311867	0.95015		0.0258324	0.976581		0.0811459	0.96681		0.400518	0.953397		0.557055	0.871586		0.00245326	0.964025		-0.233386	0.974519		0.0316898	0.97113		-1.05694	0.944823		-0.00937568	0.977706		0.583434	0.944379		1.10748	0.919079			0.975902		0.109717	0.977187		0.855594	0.925735		1.60408	0.894124
0.0669962	0.958969		-0.430612	0.926639		-1.10397	0.893937		-0.144966	0.965319		0.327646	0.953091		0.121263	0.919607		-0.450278	0.947325		-0.201398	0.976225		-0.517767	0.972509		-1.16386	0.935671		0.515881	0.949654		2.0131	0.864828		0.606125	0.957382		0.09447	0.968797		0.310904	0.978069		0.379012	0.965258		1.41195	0.925214
0.110677	0.951254		0.15714	0.922668		-1.1641	0.885964		-0.281495	0.960362		0.353891	0.940704		-0.0748733	0.908616		-1.05928	0.871326		0.137856	0.969643		-0.551946	0.97261		-0.931459	0.933901		0.25934	0.963984		0.31464	0.94877		-0.19461	0.9614		0.618328	0.921508		0.535158	0.977038		-0.40643	0.959849		1.82384	0.882896
-0.0919891	0.949122		1.40662	0.876444		-1.17426	0.88156		-0.239128	0.961775		1.45473	0.924195		-0.129324	0.92017		0.152466	0.954506		-0.300367	0.96143		-0.623327	0.968056		-1.22252	0.918626		0.322836	0.96765		0.209176	0.969243		-0.167677	0.962363		-0.343348	0.969533		0.135644	0.973849		-0.450644	0.969437		1.43592	0.889557
3.07127	0.814622		2.96758	0.813978		-1.08825	0.880831		-0.118772	0.959868		-0.123377	0.968518		0.116244	0.950975		-0.335578	0.958041		1.55543	0.915109		-0.134483	0.967709		-0.757403	0.915172		0.513364	0.9535		0.208427	0.980249		0.00157038	0.960186		1.07569	0.96872		0.159307	0.974025		0.746788	0.930821		1.17254	0.877063
2.8889	0.780172		2.66419	0.820204		-1.04718	0.891009		-0.195999	0.950458		0.988971	0.929083		0.617444	0.929591		-0.731696	0.878395		0.0832401	0.921495		-0.13644	0.966602		-0.459139	0.92582		-0.169491	0.974092		-0.0307754	0.982127		-0.330434	0.9329		0.457753	0.963977		0.347463	0.970623		-0.309214	0.959221		0.968601	0.908459
1.92235	0.815762		1.95205	0.831542		-1.10341	0.8723		0.310717	0.932454		-0.16855	0.946857		0.10548	0.93352		0.445256	0.933568		0.168606	0.903436		-0.429333	0.965351		-0.322119	0.923026		0.915562	0.877766		0.149357	0.981178		0.22939	0.945148		0.871529	0.960906		0.409672	0.97215		-0.23081	0.954142		1.38023	0.872519
2.4762	0.73286		2.04634	0.708347		1.54979	0.799548		1.98852	0.712555		-0.380567	0.838097		1.82472	0.847658		2.29363	0.690844		0.803241	0.818836		0.86042	0.800429		0.988117	0.809526		2.82576	0.702054		0.185789	0.856924		3.49296	0.690642		2.88143	0.706181		1.26081	0.741475		0.766788	0.775199		2.2145	0.743437
2.16312	0.732099		3.08401	0.694298		1.78431	0.80255		2.56049	0.693837		-0.274897	0.831887		1.64774	0.861561		2.02731	0.683825		2.8701	0.754105		-0.524065	0.815985		1.1774	0.838473		2.741	0.709296		-0.204522	0.868574		1.70384	0.71283		2.95571	0.704217		1.27297	0.738962		2.35566	0.722574		2.40215	0.717112
1.29442	0.760434		2.82803	0.693255		1.18574	0.824717		2.1779	0.698134		0.994054	0.819128		1.19235	0.867756		1.75797	0.680276		0.914795	0.826312		-1.45675	0.78007		1.26571	0.838519		2.67002	0.710408		-0.617035	0.85631		1.37822	0.731054		2.73252	0.730092		1.54664	0.732064		2.0246	0.742914		2.42231	0.713806
1.30427	0.769304		1.88049	0.717632		0.161653	0.790052		1.40127	0.771406		0.397678	0.834467		1.06469	0.867997		1.57012	0.673912		0.571801	0.829084		-0.808753	0.809829		1.44672	0.833765		2.64473	0.722318		-0.145932	0.873892		0.796202	0.740718		2.66262	0.713245		1.96333	0.729141		2.01401	0.742864		2.39659	0.691858
1.64366	0.758122		0.715858	0.728923		-0.401636	0.751193		1.54991	0.757401		0.768339	0.841129		1.2721	0.862582		1.64464	0.670918		1.21595	0.817395		1.04969	0.832552		1.56428	0.829335		2.67421	0.725828		-0.418713	0.86947		0.885131	0.735885		1.93919	0.725087		1.8514	0.717648		1.88397	0.736315		2.46648	0.714684
1.32833	0.760439		0.692093	0.730581		-0.490556	0.741796		1.53475	0.757294		-0.635737	0.8577		0.497689	0.834236		1.6532	0.67146		1.916	0.800003		2.4139	0.832598		1.2508	0.825039		2.16381	0.737477		-0.743606	0.85419		0.555138	0.775039		3.05029	0.737364		1.15633	0.736559		1.58535	0.749215		2.43818	0.719199
1.27585	0.771586		1.00605	0.729192		-0.602599	0.734846		2.4678	0.673122		-0.148508	0.837634		1.36594	0.853605		1.5905	0.669421		1.82413	0.807905		2.12979	0.841147		1.36833	0.834751		2.6527	0.720867		0.0136555	0.869049		0.758359	0.762357		2.97924	0.724612		0.747701	0.735887		1.65652	0.745424		2.43653	0.70241
1.2081	0.763242		0.729693	0.73087		-0.472399	0.740676		2.21119	0.672874		0.43323	0.838585		0.712288	0.810556		1.61061	0.673115		2.44923	0.787901		1.44119	0.846928		1.5898	0.834931		1.82004	0.741624		-0.390446	0.850085		1.50988	0.74046		1.83727	0.672704		1.05641	0.74069		1.63008	0.742491		1.7016	0.777082
2.0488	0.745648		0.802736	0.734717		-0.145249	0.798308		1.94352	0.680588		0.930444	0.800999		0.405373	0.856717		1.60452	0.664793		0.851999	0.802589		1.13799	0.839176		1.64207	0.83418		2.59977	0.706535		-1.31483	0.815129		1.51605	0.729054		2.10749	0.711793		1.59832	0.729672		1.25732	0.778786		1.84652	0.759277
1.93825	0.729705		0.659826	0.73637		1.79632	0.799231		1.87642	0.67523		-0.252625	0.85796		-0.42614	0.834151		1.64082	0.666176		0.784929	0.812441		0.70702	0.849889		1.35639	0.828968		1.71931	0.735647		-0.0515522	0.860473		0.499954	0.754931		1.36115	0.698341		1.52234	0.697187		1.67524	0.737712		2.32476	0.705983
1.34748	0.767974		0.66977	0.740284		0.962615	0.826461		1.87316	0.678594		-0.0168003	0.82751		-0.752223	0.843604		1.61732	0.678095		1.5244	0.790061		0.45725	0.850118		1.39875	0.833769		2.06733	0.729952		-0.267845	0.856214		0.71866	0.749685		1.15997	0.708735		1.2083	0.696208		1.78158	0.737044		2.62698	0.70585
1.16229	0.779255		1.61111	0.716125		-0.519652	0.737103		1.87849	0.677461		1.6661	0.786966		0.373218	0.85853		1.37	0.671826		2.17358	0.798627		1.10096	0.848531		1.17297	0.820722		2.10492	0.729841		-0.383503	0.854063		0.39978	0.741526		1.07895	0.708841		1.49209	0.700332		1.87471	0.736715		3.36708	0.703346
1.32811	0.767798		2.18014	0.699769		-0.166357	0.785925		1.85595	0.676208		-0.128293	0.846267		0.417693	0.855534		1.41018	0.664675		0.596269	0.826061		1.0214	0.844426		1.21524	0.8215		1.95625	0.739313		-1.16726	0.798673		0.762022	0.737395		1.85634	0.727747		1.79089	0.704732		1.89429	0.728989		3.26891	0.660618
1.33555	0.762696		0.82071	0.7122		-0.221567	0.770976		1.77793	0.679105		-0.230226	0.852261		-0.333606	0.807119		1.42528	0.660904		0.471079	0.816792		1.20379	0.848435		0.89979	0.82633		1.8864	0.739658		-1.09857	0.814652		0.638046	0.730294		2.36701	0.720281		1.69431	0.703597		1.85738	0.733282		2.76653	0.675957
1.43058	0.766227		0.519635	0.727214		-0.363189	0.746522		1.79969	0.684392		0.851773	0.786944		0.302938	0.841238		1.47444	0.665909		1.82923	0.766925		1.33843	0.847525		0.93821	0.82315		2.43437	0.732904		-0.0100233	0.841616		0.263291	0.726233		1.77989	0.72246		1.77046	0.698181		2.04106	0.730902		2.62219	0.687288
1.48041	0.752418		0.578893	0.73142		-0.404949	0.744656		1.72577	0.680302		1.10797	0.821407		0.290976	0.83532		1.46069	0.669027		2.17582	0.778921		1.11773	0.845612		0.985425	0.81639		2.34151	0.746356		1.14041	0.800733		0.992394	0.710828		2.01039	0.722558		1.84084	0.691931		2.06094	0.718627		2.03916	0.690224
1.3029	0.776208		0.717615	0.73688		-0.494658	0.749977		1.81834	0.680265		-0.210051	0.839698		0.562929	0.852093		1.5585	0.673244		0.468614	0.816626		1.30837	0.844962		2.32675	0.805629		1.66976	0.755783		0.774303	0.809912		0.776641	0.723968		2.30864	0.703665		1.39513	0.68582		1.89789	0.725338		0.875696	0.773904
1.44146	0.771095		0.665027	0.728718		2.02801	0.798174		1.63052	0.672443		-0.106936	0.83472		-0.196366	0.812519		1.39112	0.670128		1.23796	0.776866		0.984947	0.838363		2.51191	0.814533		1.34698	0.76232		0.15595	0.851732		1.07914	0.713026		2.41615	0.703255		0.596134	0.672044		1.87859	0.724664		1.69059	0.715832
1.82558	0.763708		0.642105	0.725223		1.85606	0.801616		1.62355	0.671627		1.09147	0.775322		0.622435	0.826847		1.36681	0.661177		2.43878	0.756289		1.11105	0.834808		2.11618	0.820702		1.66858	0.755381		-0.26698	0.858899		2.01246	0.695459		2.43064	0.717156		1.33481	0.689687		1.70201	0.722082		1.58526	0.730749
2.04632	0.72337		1.69406	0.697512		1.00111	0.827273		1.60054	0.670587		1.43388	0.78706		0.669375	0.815351		1.31341	0.676911		1.84113	0.768116		1.19431	0.832459		1.43486	0.799308		1.54727	0.738503		0.142978	0.859123		0.638903	0.717629		1.36977	0.671217		1.52009	0.695046		1.72904	0.731394		1.11766	0.740097
3.26004	0.66204		2.76309	0.657967		0.614293	0.831761		1.69416	0.669696		1.03368	0.818964		-0.636149	0.746653		1.2042	0.659142		0.538911	0.804997		1.45513	0.827875		0.915114	0.799136		1.35939	0.760008		-0.0909336	0.858571		0.325661	0.727578		2.29039	0.704485		1.209	0.67539		1.73776	0.73239		1.26577	0.715541
2.95609	0.678775		2.43836	0.647465		0.345825	0.820909		1.58829	0.673099		1.40039	0.791105		0.961465	0.842404		1.30159	0.6635		0.48585	0.811462		1.37407	0.827705		0.582137	0.817259		1.20744	0.769244		-0.510244	0.843701		0.425285	0.728262		1.84401	0.693613		0.757721	0.650232		1.77198	0.73109		1.75235	0.721725
1.57622	0.729298		1.34807	0.693711		-0.362403	0.753836		1.67296	0.683148		0.345537	0.836911		-0.412385	0.740641		1.781	0.68397		0.944984	0.785181		1.15985	0.835251		0.652937	0.814217		1.27863	0.752669		-1.33042	0.801005		1.13001	0.715268		1.57858	0.699698		0.140381	0.643225		1.77574	0.730521		1.58787	0.742234
1.13215	0.762522		0.74588	0.711956		-0.115525	0.766618		1.5284	0.672283		0.943571	0.803132		-0.981934	0.749008		2.10612	0.689252		1.56301	0.778047		1.49011	0.834264		0.69155	0.808951		1.01885	0.755719		-0.136487	0.834721		0.63312	0.73491		1.35908	0.662766		-1.57731	0.530086		1.70126	0.727602		1.24058	0.75569
1.0829	0.766138		0.612026	0.718424		1.73302	0.78762		1.51218	0.674049		2.90244	0.727624		-2.34452	0.728325		1.91145	0.6872		0.6861	0.796194		1.50747	0.841267		0.815074	0.81087		1.19104	0.74046		-0.593841	0.830925		0.267688	0.727741		1.46386	0.685462		0.151851	0.613954		1.62262	0.725146		1.70501	0.708746
1.03059	0.773823		0.6655	0.721694		2.0102	0.80463		1.50602	0.674277		1.44684	0.801736		-1.56849	0.853139		1.51353	0.682295		1.77745	0.750611		1.1642	0.836205		0.912343	0.807024		1.69561	0.734433		-0.78351	0.78702		0.205444	0.722189		1.21606	0.703514		0.329447	0.680169		1.58742	0.730248		1.48433	0.745792
1.1414	0.775383		1.03551	0.713857		0.695818	0.822629		1.491	0.676284		-0.127732	0.829524		1.06236	0.857788		1.42003	0.666913		2.15114	0.768225		1.38233	0.837881		0.831479	0.804243		2.42695	0.744009		-0.215803	0.847799		0.247024	0.718027		0.951299	0.708337		0.51532	0.686026		1.62294	0.73174		2.09902	0.695842
2.21555	0.728458		0.686786	0.725043		-0.203984	0.758359		1.5496	0.673141		-0.20935	0.828789		0.464729	0.854316		1.54169	0.665214		0.793755	0.801428		1.40436	0.829725		1.19278	0.795919		2.52179	0.737081		-0.565043	0.832426		0.670986	0.720732		1.05068	0.686322		0.124818	0.679351		1.67332	0.727458		1.79062	0.727623
1.68551	0.725891		1.46912	0.701037		-0.501824	0.733267		1.57697	0.669035		0.0960343	0.828633		-0.0124927	0.859789		1.61203	0.66669		0.344683	0.815346		1.36362	0.82251		-0.30142	0.805528		2.3664	0.737403		-1.11281	0.802946		2.23415	0.666349		0.876384	0.677362		0.257446	0.66646		1.85297	0.740019		1.75496	0.697367
1.15912	0.759088		1.36158	0.68073		-0.243707	0.746372		1.4346	0.673264		-0.0378945	0.825084		-0.520793	0.845406		1.59801	0.66339		0.864319	0.79161		1.53527	0.830833		-0.189212	0.805911		2.38657	0.739372		-0.00648972	0.834444		1.9655	0.696782		0.89398	0.689764		-0.00446613	0.692133		1.82293	0.748227		1.67755	0.735365
0.914762	0.936515		-0.324666	0.889278		2.09978	0.819767		1.76818	0.803369		-0.829818	0.956499		0.436807	0.968773		0.421766	0.952362		1.19658	0.80551		1.89121	0.911008		0.972547	0.935402		0.596393	0.960028		0.742287	0.959576		-0.021783	0.963851		0.193817	0.952963		0.35879	0.965976		1.7881	0.871288		2.169	0.906714
0.548713	0.958367		-0.305497	0.908288		1.51647	0.83993		1.9821	0.838513		0.246477	0.976424		0.953839	0.949078		0.273994	0.957328		0.797431	0.737116		1.77439	0.942164		0.414825	0.953025		0.464516	0.976845		2.38182	0.853941		-0.0230913	0.973155		0.187052	0.955429		0.334123	0.982114		2.79265	0.878723		2.77438	0.850847
0.229025	0.966331		-0.659247	0.871274		0.571302	0.947135		1.7275	0.872097		-0.772128	0.963692		0.76994	0.920612		0.10124	0.981299		0.329509	0.714612		1.42892	0.95221		0.639752	0.960093		0.620249	0.961566		0.885475	0.921244		0.180106	0.964597		0.509711	0.874169		0.235939	0.982043		2.71438	0.89244		2.63471	0.875176
0.132822	0.968356		-0.652052	0.861072		1.34454	0.859473		1.79882	0.846575		-0.933783	0.953548		-0.235269	0.874031		0.108353	0.989466		0.323507	0.710391		0.954858	0.95992		0.270723	0.964866		0.470343	0.977987		2.28309	0.848147		0.0699009	0.976999		0.244672	0.879293		0.364634	0.983342		2.4253	0.897318		1.79155	0.952327
0.284896	0.981007		-0.964076	0.828496		1.15135	0.866916		1.27676	0.92765		-1.0623	0.931453		0.721308	0.932868		0.196727	0.978732		0.224256	0.761836		0.681107	0.960695		-0.026068	0.968375		0.298875	0.976835		1.34031	0.881167		0.149458	0.967047		-0.058065	0.978073		0.464195	0.98621		1.07763	0.956512		0.509264	0.977617
0.241641	0.984723		-0.86326	0.857417		1.44661	0.852937		0.417544	0.969667		-0.034377	0.978921		0.0812638	0.893047		-0.331351	0.965676		0.070381	0.827839		0.808079	0.967897		0.0645987	0.968331		0.526544	0.970551		0.472384	0.935222		0.421659	0.967397		-0.0203248	0.984199		0.225316	0.988931		0.283643	0.964369		2.53742	0.882347
0.441853	0.985669		-0.379344	0.901369		0.663882	0.930204		0.117278	0.979667		-0.732123	0.95619		0.732396	0.922839		0.178553	0.960556		0.522768	0.865443		0.58223	0.968846		0.28048	0.975754		0.125325	0.988221		0.532618	0.970102		1.10481	0.924808		0.0740885	0.969728		0.194358	0.991433		0.107301	0.976062		2.47143	0.893705
0.209801	0.988576		-0.321375	0.908229		1.42917	0.835513		0.0702457	0.982239		-1.46675	0.937783		0.602579	0.931122		0.857675	0.910292		2.10306	0.861494		0.476551	0.976206		0.176286	0.965518		-0.154641	0.981578		0.386353	0.971958		1.67081	0.914875		0.0922171	0.986218		0.26914	0.991823		0.528738	0.967704		2.52327	0.859204
0.0424411	0.98782		-0.770034	0.859687		0.21814	0.971034		0.0272061	0.980725		-1.4575	0.915259		0.22703	0.894258		0.735003	0.93183		0.456793	0.961625		-0.0229462	0.978825		0.202178	0.972938		0.504318	0.948391		0.14332	0.988072		1.47573	0.912256		0.191299	0.940113		0.634413	0.990872		0.285716	0.983329		1.76119	0.945991
0.212194	0.99129		-1.04374	0.808116		1.88567	0.817003		-0.0151768	0.985371		0.565335	0.983554		0.414534	0.954643		0.297143	0.969981		0.324008	0.97809		0.547697	0.975986		0.318946	0.978584		0.396115	0.983521		0.821993	0.956497		-0.0444575	0.978453		0.244431	0.928629		0.08933	0.99378		0.032668	0.988792		1.11215	0.975854
-0.00730564	0.990105		-0.684642	0.93002		0.834618	0.925888		0.26405	0.986107		-0.887531	0.95131		0.196212	0.975255		0.41192	0.971105		0.233896	0.984813		0.359806	0.981065		0.196329	0.993638		0.0247176	0.985095		0.249874	0.988089		-0.0583235	0.98888		-0.152206	0.989999		0.242654	0.995518		0.231178	0.987317		0.203593	0.98762
0			0			0			0			0			0			0			0			0			0			0			0			0			0			0			0			0
0.34002	0.987887		-0.520869	0.966482		1.12373	0.865974		0.0703686	0.986182		-0.409093	0.981987		0.464761	0.991511		-0.0910107	0.985694		-0.0187453	0.988371		0.127942	0.984956		-0.269172	0.992493		0.805601	0.930626		0.255779	0.98841		-0.339899	0.975595		0.0471389	0.981564		0.184819	0.995338		0.0784875	0.98557		0.682179	0.982868
0.134278	0.991028		-0.212368	0.978234		1.61405	0.824018		0.585023	0.962491		0.269488	0.986421		0.247442	0.990163		0.216684	0.977363		0.177319	0.982639		-0.393303	0.97899		-0.34707	0.989105		0.438997	0.981544		-0.653005	0.977404		0.153199	0.959623		-0.00978918	0.989349		0.379335	0.994435		2.66983	0.883568		-0.0165086	0.97379
0.155225	0.99134		-0.802958	0.921251		1.40739	0.843103		0.203726	0.978579		-0.752521	0.962251		0.135947	0.987615		-0.322629	0.946909		0.368056	0.971725		0.79661	0.97267		-0.0651611	0.985551		0.276454	0.986811		0.227879	0.988028		0.0602095	0.960228		0.0359648	0.989754		0.314365	0.993157		2.25961	0.88317		1.19216	0.959353
0.00998444	0.988389		-0.57214	0.933424		1.13725	0.888638		0.168891	0.973732		-1.47228	0.92908		0.0920085	0.968725		-0.0329138	0.975071		0.209036	0.979075		0.252788	0.982731		-0.505909	0.981262		0.10903	0.984765		-0.210411	0.988014		0.298845	0.955755		-0.0775514	0.967087		0.342332	0.992885		2.07565	0.892579		0.959705	0.964827
0.26351	0.983284		-1.2852	0.873203		0.490107	0.952134		0.0681421	0.977058		-1.09	0.978601		0.466422	0.946498		-0.0689119	0.983335		0.279937	0.980846		0.336403	0.978557		-0.450804	0.969564		0.592338	0.963752		-0.0159725	0.981945		0.321081	0.967102		0.297664	0.847729		0.532891	0.991806		0.579177	0.97012		0.708579	0.9633
0.196062	0.985733		0.288145	0.978283		-0.273451	0.974401		0.0957438	0.971057		-1.00749	0.955754		0.334055	0.915733		0.724304	0.909249		1.1351	0.93922		0.372204	0.972748		-0.219576	0.956205		0.406311	0.9847		1.92713	0.868799		0.415204	0.94776		0.112786	0.972627		0.319884	0.991002		0.664986	0.957665		1.70767	0.936954
0.127927	0.984656		-0.431778	0.965597		0.513532	0.923635		1.16737	0.91467		-1.04992	0.949535		-0.225454	0.885421		0.377643	0.952469		0.410425	0.970371		0.119533	0.967886		-0.196659	0.951162		0.468962	0.974762		0.53324	0.961911		1.78719	0.890659		-0.0546535	0.980193		0.486925	0.988694		0.323618	0.977433		1.80997	0.928718
0.15589	0.985901		-0.00465529	0.968552		1.84318	0.79753		0.358691	0.956216		-1.55894	0.923276		-0.0716948	0.8622		-0.0297946	0.986754		0.642907	0.951556		0.145626	0.975802		-0.0631617	0.960365		-0.0588314	0.962827		0.497571	0.969575		0.217533	0.931735		0.341862	0.965918		0.739109	0.988358		1.23128	0.935099		1.60228	0.926531
-0.00707916	0.982134		0.244224	0.963073		0.705303	0.926592		0.432329	0.96039		-1.57725	0.925465		-0.0188098	0.858998		0.176292	0.980003		0.830413	0.926327		0.0149647	0.974331		0.438588	0.953388		0.678625	0.945452		0.17181	0.982411		-0.197495	0.955317			0.986187		0.50928	0.987347		0.0262362	0.978031		1.78202	0.895914
0.00154436	0.981302		-0.276093	0.954532		0.721816	0.893553		0.0977031	0.969681		-1.27942	0.927709		-0.450469	0.831299		-0.153557	0.976173		1.43698	0.907834		0.682343	0.970513		0.14407	0.943656		0.492735	0.966286		-0.15075	0.984105		-0.281492	0.966416		-0.155199	0.975097		0.35751	0.985323		-0.04286	0.972739		1.90777	0.889314
-0.218275	0.977975		-0.706952	0.927148		1.27535	0.820556		0.173738	0.967026		-1.5666	0.91675		0.514467	0.825081		-0.107666	0.971912		0.568333	0.936967		0.294824	0.972473		-0.274556	0.931836		0.635498	0.946556		-0.817644	0.954946		0.053658	0.948978		0.335968	0.983235		0.59224	0.98265		-0.182528	0.972203		1.93855	0.895799
-0.187577	0.970543		-0.715829	0.945501		0.86045	0.902149		0.345196	0.958023		-0.487013	0.976804		0.753268	0.820782		0.414373	0.921652		0.000510291	0.97786		0.391496	0.954341		-0.860612	0.938034		0.0153419	0.960179		0.833308	0.935071		1.04915	0.894651			0.982647		0.352371	0.982333		1.08677	0.925265		1.80767	0.894139
0.0596906	0.965978		-1.11525	0.862238		-0.269349	0.971985		0.119083	0.967321		-0.559885	0.952646		0.317476	0.868199		-0.0383582	0.97648		0.0324978	0.978345		-0.157961	0.96575		-0.967527	0.928341		0.540599	0.95654		2.26297	0.829764		0.547802	0.948506		-0.0577358	0.96597		0.553557	0.981736		0.610189	0.961062		1.61554	0.925809
0.103371	0.957143		-0.527502	0.904346		-0.329487	0.968497		-0.0174449	0.966645		-0.53364	0.969415		0.121339	0.856871		-0.647364	0.932719		0.371752	0.964665		-0.19214	0.964528		-0.73513	0.927857		0.284058	0.964056		0.564514	0.931909		-0.252933	0.961882		0.466122	0.90792		0.777812	0.978942		-0.175252	0.968464		2.02743	0.882653
-0.0992947	0.947256		0.721975	0.904695		-0.339644	0.963062		0.0249219	0.96293		0.567203	0.976571		0.066888	0.876802		0.564386	0.902356		-0.0664715	0.971403		-0.263521	0.963463		-1.02619	0.913734		0.347553	0.96947		0.45905	0.952837		-0.226	0.959702		-0.495554	0.979226		0.378298	0.979023		-0.219466	0.972415		1.63952	0.889853
3.06397	0.818712		2.28294	0.824022		-0.253632	0.955834		0.145278	0.953096		-1.01091	0.954728		0.312457	0.93891		0.0763414	0.975821		1.78932	0.88817		0.225323	0.959839		-0.561074	0.907648		0.538082	0.959814		0.458301	0.96855		-0.0567531	0.955132		0.923488	0.965734		0.401961	0.978085		0.977966	0.92096		1.37613	0.877343
2.88159	0.790263		1.97954	0.821694		-0.212563	0.951586		0.0680508	0.953445		0.101439	0.976272		0.813656	0.952175		-0.319776	0.940505		0.317136	0.906511		0.223366	0.958518		-0.26281	0.918754		-0.144773	0.967943		0.219099	0.979606		-0.388758	0.936515		0.305547	0.955791		0.590117	0.975734		-0.0780357	0.96824		1.17219	0.907792
1.91505	0.825641		1.26741	0.857683		-0.268793	0.950636		0.574767	0.919377		-1.05608	0.945647		0.301692	0.965204		0.857175	0.878848		0.402502	0.889681		-0.0695271	0.958141		-0.125789	0.9136		0.940279	0.913594		0.399231	0.978396		0.171067	0.931796		0.719324	0.973441		0.652326	0.97581		0.000367338	0.966873		1.58382	0.873104
2.46889	0.741408		1.3617	0.718602		2.38441	0.705999		2.25257	0.681972		-1.2681	0.850285		2.02094	0.864109		2.70555	0.68571		1.03714	0.813984		1.22023	0.811922		1.18445	0.809663		2.85047	0.725615		0.435663	0.837472		3.43463	0.666635		2.72923	0.699625		1.50346	0.743871		0.997966	0.791865		2.41809	0.743659
2.15582	0.743692		2.39937	0.692225		2.61893	0.693778		2.82454	0.659581		-1.16243	0.869272		1.84395	0.883508		2.43923	0.680839		3.10399	0.745826		-0.164259	0.834654		1.37373	0.835865		2.76572	0.734083		0.045352	0.85875		1.64551	0.701959		2.8035	0.698566		1.51562	0.740615		2.58683	0.738415		2.60575	0.713624
1.28711	0.774789		2.14339	0.694981		2.02036	0.726508		2.44195	0.667118		0.106523	0.875484		1.38856	0.883149		2.16989	0.678897		1.14869	0.828087		-1.09695	0.80969		1.46204	0.835924		2.69473	0.737578		-0.367161	0.858598		1.3199	0.717573		2.58031	0.727607		1.78929	0.730599		2.25578	0.755935		2.6259	0.711995
1.29696	0.783905		1.19585	0.74388		0.996271	0.772736		1.66532	0.750403		-0.489853	0.878959		1.2609	0.883541		1.98204	0.673275		0.805697	0.831319		-0.448947	0.827647		1.64305	0.832167		2.66945	0.749655		0.103942	0.865533		0.737879	0.734049		2.51042	0.709317		2.20599	0.727717		2.24519	0.756694		2.60018	0.689014
1.63635	0.774371		0.0312163	0.749921		0.432982	0.786195		1.81396	0.734509		-0.119192	0.870778		1.46831	0.856308		2.05656	0.668963		1.44985	0.81415		1.4095	0.830528		1.76061	0.829235		2.69893	0.754357		-0.168839	0.867204		0.826807	0.727261		1.78699	0.722313		2.09405	0.71508		2.11515	0.750233		2.67007	0.713732
1.32103	0.777195		0.00745058	0.752025		0.344062	0.787103		1.7988	0.730742		-1.52327	0.835886		0.693901	0.813424		2.06512	0.671137		2.1499	0.798236		2.7737	0.822845		1.44713	0.823685		2.18852	0.763995		-0.493732	0.85921		0.496815	0.76817		2.89808	0.732188		1.39898	0.738012		1.81653	0.761166		2.64177	0.719382
1.26855	0.787217		0.321406	0.751285		0.232018	0.790617		2.73185	0.638208		-1.03604	0.879568		1.56215	0.886421		2.00242	0.669278		2.05802	0.807563		2.48959	0.826647		1.56466	0.831994		2.67742	0.751185		0.26353	0.861299		0.700035	0.757321		2.82703	0.719348		0.990355	0.737806		1.8877	0.758342		2.64012	0.702354
1.2008	0.781527		0.0450513	0.74272		0.362218	0.788386		2.47524	0.640901		-0.454301	0.867377		0.908501	0.799916		2.02253	0.673746		2.68313	0.779356		1.801	0.828236		1.78613	0.832468		1.84476	0.770657		-0.140572	0.852766		1.45156	0.730115		1.68506	0.671539		1.29906	0.742676		1.86126	0.755596		1.9052	0.780982
2.0415	0.757106		0.118094	0.741531		0.689368	0.794856		2.20757	0.645766		0.0429123	0.869902		0.601586	0.856324		2.01644	0.66664		1.0859	0.800607		1.4978	0.824955		1.8384	0.833044		2.62449	0.738486		-1.06495	0.82532		1.45773	0.712453		1.95528	0.71058		1.84097	0.730088		1.4885	0.792142		2.05011	0.760348
1.93095	0.744621		-0.0248161	0.733527		2.63094	0.679008		2.14047	0.639014		-1.14016	0.847236		-0.229928	0.824494		2.05274	0.666526		1.01882	0.81185		1.06683	0.831268		1.55272	0.826748		1.74402	0.764854		0.198322	0.864493		0.441631	0.758238		1.20895	0.693868		1.76499	0.696044		1.90641	0.751119		2.52835	0.707519
1.34018	0.782629		-0.0148718	0.742885		1.79723	0.733498		2.13721	0.644328		-0.904331	0.86697		-0.556011	0.852645		2.02924	0.675801		1.75829	0.786301		0.817056	0.837478		1.59508	0.832611		2.09204	0.763334		-0.0179707	0.856768		0.660336	0.74815		1.00776	0.701959		1.45095	0.694115		2.01276	0.752884		2.83058	0.707953
1.15498	0.791195		0.92647	0.719851		0.314965	0.786397		2.14254	0.64393		0.778569	0.863944		0.56943	0.869211		1.78192	0.670547		2.40748	0.789055		1.46077	0.836975		1.3693	0.819412		2.12964	0.763967		-0.133629	0.852209		0.341457	0.739813		0.926745	0.702536		1.73475	0.701337		2.10588	0.751749		3.57067	0.704652
1.32081	0.784289		1.4955	0.721729		0.668261	0.793052		2.12	0.640616		-1.01582	0.850706		0.613905	0.865339		1.8221	0.663802		0.830165	0.826649		1.38121	0.831833		1.41157	0.819335		1.98096	0.774504		-0.917386	0.813705		0.703698	0.731539		1.70413	0.723637		2.03354	0.705068		2.12547	0.745186		3.4725	0.661029
1.32824	0.778344		0.136068	0.729716		0.61305	0.790706		2.04198	0.643698		-1.11776	0.853005		-0.137394	0.779173		1.8372	0.659664		0.704975	0.814328		1.56359	0.836028		1.09612	0.825343		1.91112	0.772985		-0.8487	0.826646		0.579723	0.730011		2.21481	0.716662		1.93697	0.704497		2.08856	0.748883		2.97012	0.67477
1.42328	0.779234		-0.165007	0.729648		0.471428	0.78178		2.06374	0.650236		-0.0357577	0.869776		0.49915	0.824838		1.88636	0.663859		2.06313	0.757881		1.69824	0.836387		1.13454	0.822498		2.45909	0.764192		0.239851	0.83943		0.204967	0.732129		1.62768	0.71823		2.01312	0.699835		2.27223	0.745707		2.82578	0.685752
1.4731	0.767616		-0.105749	0.731328		0.429668	0.78684		1.98982	0.648413		0.220443	0.854706		0.487188	0.807674		1.87261	0.666972		2.40971	0.771053		1.47754	0.82786		1.18175	0.813643		2.36623	0.778237		1.39029	0.778251		0.93407	0.698401		1.85819	0.71811		2.08349	0.692549		2.29212	0.738335		2.24275	0.689434
1.29559	0.789115		0.0329732	0.736506		0.339959	0.783531		2.08239	0.648291		-1.09758	0.82747		0.759141	0.83653		1.97042	0.669665		0.70251	0.823943		1.66818	0.827335		2.52308	0.806763		1.69448	0.780004		1.02418	0.783643		0.718317	0.726537		2.15643	0.693855		1.63779	0.687196		2.12906	0.743598		1.07929	0.777836
1.43415	0.784472		-0.0196151	0.721559		2.86263	0.677174		1.89457	0.639818		-0.994467	0.839685		-0.000153633	0.77435		1.80304	0.668665		1.47186	0.774052		1.34475	0.818635		2.70824	0.814535		1.3717	0.788926		0.405824	0.8284		1.02082	0.703132		2.26394	0.697126		0.838788	0.673877		2.10977	0.74409		1.89418	0.717768
1.81827	0.773796		-0.0425372	0.726618		2.69068	0.685427		1.8876	0.638193		0.203934	0.854449		0.818648	0.7885		1.77873	0.658532		2.67268	0.75106		1.47085	0.820447		2.31251	0.821964		1.69329	0.786102		-0.0171064	0.85143		1.95414	0.672727		2.27844	0.709631		1.57747	0.693517		1.93319	0.738715		1.78886	0.733821
2.03901	0.73707		1.00942	0.698764		1.83573	0.740866		1.86459	0.638734		0.546348	0.849076		0.865587	0.77795		1.72533	0.672817		2.07503	0.761991		1.55411	0.819588		1.63119	0.802746		1.57198	0.772418		0.392852	0.8432		0.58058	0.705211		1.21756	0.665338		1.76274	0.697883		1.96022	0.746166		1.32125	0.743067
3.25273	0.671515		2.07845	0.661387		1.44891	0.7632		1.95821	0.638301		0.146145	0.845338		-0.439937	0.688268		1.61612	0.657535		0.772807	0.805816		1.81493	0.816057		1.11144	0.801849		1.3841	0.788759		0.15894	0.852542		0.267338	0.721796		2.13818	0.701061		1.45165	0.675406		1.96894	0.748032		1.46936	0.72022
2.94879	0.690461		1.75372	0.656926		1.18044	0.775524		1.85234	0.641967		0.51286	0.849445		1.15768	0.821702		1.71351	0.66139		0.719746	0.812586		1.73387	0.815895		0.778466	0.818462		1.23216	0.795921		-0.26037	0.845841		0.366961	0.714602		1.6918	0.690902		1.00038	0.651028		2.00316	0.747108		1.95594	0.727359
1.56891	0.749685		0.663432	0.718467		0.472215	0.784635		1.93701	0.651975		-0.541994	0.830503		-0.216173	0.675913		2.19292	0.67998		1.17888	0.779174		1.51965	0.823266		0.849266	0.815101		1.30334	0.782914		-1.08055	0.812253		1.07169	0.701101		1.42638	0.6956		0.383035	0.641602		2.00692	0.747889		1.79147	0.746106
1.12485	0.780772		0.0612381	0.723102		0.719092	0.775394		1.79245	0.641179		0.0560397	0.85484		-0.785721	0.694702		2.51803	0.687368		1.7969	0.770597		1.84992	0.820984		0.887879	0.809231		1.04357	0.783421		0.113387	0.835077		0.574797	0.730333		1.20687	0.655903		-1.33466	0.525495		1.93244	0.744475		1.44417	0.760202
1.07559	0.783503		-0.0726157	0.724573		2.56763	0.671137		1.77623	0.641446		2.01491	0.8288		-2.14831	0.684933		2.32337	0.680674		0.919996	0.790934		1.86728	0.824963		1.0114	0.808927		1.21576	0.772029		-0.343967	0.835301		0.209364	0.727452		1.31166	0.680033		0.394504	0.609622		1.8538	0.742703		1.9086	0.714446
1.02328	0.790512		-0.0191422	0.722299		2.84481	0.685524		1.77007	0.642352		0.559309	0.838865		-1.37228	0.860467		1.92544	0.67681		2.01135	0.739176		1.524	0.81454		1.10867	0.804603		1.72033	0.770776		-0.533636	0.799347		0.147121	0.718006		1.06386	0.694868		0.5721	0.680326		1.81859	0.747073		1.68792	0.751897
1.1341	0.79169		0.350865	0.726349		1.53044	0.74807		1.75505	0.645476		-1.01526	0.805653		1.25857	0.887858		1.83195	0.664799		2.38504	0.754066		1.74214	0.817741		1.02781	0.801573		2.45166	0.776428		0.0340711	0.851365		0.1887	0.716164		0.799093	0.701746		0.757974	0.68767		1.85411	0.748696		2.30261	0.701848
2.20824	0.741657		0.00214367	0.72008		0.630634	0.7739		1.81365	0.642238		-1.09688	0.805568		0.660942	0.888387		1.9536	0.662525		1.02765	0.797267		1.76417	0.803169		1.38911	0.796287		2.54651	0.768148		-0.315169	0.840817		0.612663	0.713292		0.898474	0.680199		0.367471	0.681007		1.9045	0.743719		1.99422	0.731749
1.67821	0.743424		0.784476	0.699952		0.332793	0.775211		1.84102	0.638414		-0.791497	0.816089		0.18372	0.884811		2.02395	0.663956		0.578579	0.816552		1.72343	0.796077		-0.105091	0.806582		2.39112	0.770339		-0.862935	0.813706		2.17583	0.640248		0.724178	0.669259		0.500099	0.665871		2.08415	0.755201		1.95855	0.701441
1.15182	0.773601		0.676942	0.709564		0.59091	0.774116		1.69865	0.642769		-0.925426	0.80835		-0.324581	0.83809		2.00993	0.659725		1.09822	0.788989		1.89508	0.808907		0.00711738	0.807601		2.41129	0.770282		0.243384	0.832366		1.90717	0.678889		0.741774	0.680423		0.238188	0.692719		2.05411	0.759484		1.88114	0.741673
0.574742	0.942932		0.196203	0.872691		0.976059	0.957022		1.69782	0.822024		-0.420725	0.960746		-0.0279534	0.970924		0.512777	0.925709		1.21533	0.816271		1.76327	0.918307		1.24172	0.929368		-0.209208	0.956824		0.486508	0.971306		0.318116	0.938555		0.146678	0.960975		0.173971	0.962966		1.70961	0.894284		1.48682	0.90311
0.208693	0.963019		0.215372	0.881671		0.392747	0.958167		1.91173	0.85318		0.65557	0.962389		0.489078	0.939579		0.365005	0.931329		0.816176	0.736175		1.64645	0.945023		0.683997	0.95107		-0.341086	0.942663		2.12604	0.885346		0.316808	0.955886		0.139913	0.964544		0.149303	0.97823		2.71417	0.900163		2.0922	0.847191
-0.110995	0.96073		-0.138378	0.872967		-0.552423	0.915596		1.65713	0.884137		-0.363035	0.978851		0.305179	0.904697		0.19225	0.972357		0.348254	0.708502		1.30097	0.955528		0.908924	0.958365		-0.185352	0.969242		0.629696	0.945914		0.520006	0.946563		0.462572	0.892221		0.0511198	0.977886		2.63589	0.911335		1.95253	0.872922
-0.207199	0.959451		-0.131183	0.878101		0.220814	0.975272		1.72845	0.863515		-0.52469	0.971668		-0.70003	0.850967		0.199364	0.981198		0.342252	0.708864		0.826917	0.950743		0.539895	0.961861		-0.335259	0.952482		2.02732	0.877924		0.4098	0.965204		0.197533	0.895952		0.179814	0.97944		2.34681	0.912361		1.10938	0.952011
-0.0551243	0.977877		-0.443207	0.850186		0.0276297	0.976119		1.20639	0.934275		-0.653209	0.958585		0.256547	0.918694		0.287738	0.964951		0.243001	0.757504		0.553166	0.956339		0.243104	0.9664		-0.506726	0.960475		1.08453	0.914694		0.489358	0.934073		-0.105204	0.967768		0.279376	0.983165		0.999145	0.942249		-0.172915	0.965825
-0.0983789	0.981254		-0.34239	0.873631		0.322884	0.973962		0.347176	0.964683		0.374716	0.966073		-0.383497	0.869793		-0.24034	0.982962		0.0891263	0.829334		0.680138	0.965527		0.333771	0.965826		-0.279058	0.970029		0.216605	0.958926		0.761559	0.931792		-0.0674637	0.973184		0.0404967	0.98586		0.205156	0.95128		1.85524	0.884657
0.101832	0.984251		0.141525	0.879607		-0.459843	0.955237		0.0469097	0.969511		-0.32303	0.974596		0.267635	0.90867		0.269564	0.956212		0.541513	0.865776		0.454288	0.956304		0.549652	0.973002		-0.680276	0.918867		0.276839	0.980702		1.44471	0.876362		0.0269496	0.981008		0.00953888	0.989538		0.0288137	0.964884		1.78925	0.893876
-0.13022	0.981586		0.199494	0.89306		0.305441	0.976945		-0.000122874	0.975908		-1.05766	0.961631		0.137818	0.913307		0.948686	0.878		2.12181	0.866209		0.348609	0.968749		0.445458	0.960472		-0.960242	0.885772		0.130574	0.985063		2.01071	0.871227		0.0450782	0.971488		0.084321	0.989506		0.45025	0.964591		1.84109	0.85968
-0.297579	0.979753		-0.249165	0.875038		-0.905585	0.926214		-0.0431625	0.974354		-1.0484	0.949662		-0.237731	0.870254		0.826014	0.900611		0.475539	0.961078		-0.150888	0.968821		0.471349	0.971239		-0.301283	0.984681		-0.112459	0.987944		1.81563	0.86347		0.14416	0.956402		0.449594	0.987598		0.207229	0.976473		1.07901	0.945869
-0.127826	0.986395		-0.522868	0.837488		0.761945	0.979248		-0.0855454	0.976133		0.974428	0.963752		-0.0502268	0.939651		0.388154	0.944454		0.342753	0.978083		0.419756	0.982344		0.588117	0.977058		-0.409487	0.961568		0.566214	0.976606		0.295442	0.963154		0.197292	0.941575		-0.0954891	0.991382		-0.0458195	0.982119		0.429972	0.972717
-0.347326	0.975594		-0.163773	0.945076		-0.289108	0.953307		0.193681	0.988547		-0.478438	0.979628		-0.268548	0.964522		0.50293	0.94275		0.252641	0.986262		0.231864	0.98365		0.465501	0.991786		-0.780884	0.890826		-0.00590517	0.99002		0.281576	0.967588		-0.199345	0.983675		0.0578346	0.992826		0.15269	0.982228		-0.478586	0.97237
-0.34002	0.987887		0.520869	0.966482		-1.12373	0.865974		-0.0703686	0.986182		0.409093	0.981987		-0.464761	0.991511		0.0910107	0.985694		0.0187453	0.988371		-0.127942	0.984956		0.269172	0.992493		-0.805601	0.930626		-0.255779	0.98841		0.339899	0.975595		-0.0471389	0.981564		-0.184819	0.995338		-0.0784875	0.98557		-0.682179	0.982868
0			0			0			0			0			0			0			0			0			0			0			0			0			0			0			0			0
-0.205743	0.98748		0.308501	0.981136		0.49032	0.975712		0.514654	0.976279		0.678581	0.983342		-0.217319	0.993911		0.307695	0.959773		0.196064	0.988297		-0.521244	0.968734		-0.0778983	0.991318		-0.366604	0.951225		-0.908784	0.964968		0.493098	0.934612		-0.056928	0.981173		0.194516	0.995845		2.59134	0.910473		-0.698688	0.987179
-0.184795	0.985324		-0.282089	0.963931		0.283667	0.972703		0.133357	0.984277		-0.343427	0.98475		-0.328814	0.983778		-0.231619	0.975418		0.386802	0.978934		0.668668	0.982214		0.204011	0.985872		-0.529148	0.949711		-0.0279003	0.990662		0.400109	0.936793		-0.0111741	0.974795		0.129546	0.993399		2.18113	0.912032		0.509976	0.972763
-0.330036	0.978664		-0.051271	0.975656		0.0135275	0.97175		0.0985229	0.977329		-1.06319	0.959869		-0.372752	0.957971		0.0580969	0.980682		0.227781	0.985256		0.124846	0.986831		-0.236738	0.982942		-0.696572	0.911818		-0.46619	0.986329		0.638744	0.922407		-0.12469	0.953872		0.157513	0.994171		1.99716	0.91799		0.277526	0.972048
-0.0765099	0.982857		-0.764331	0.933064		-0.633619	0.935737		-0.00222651	0.977988		-0.680903	0.978085		0.0016616	0.934718		0.0220988	0.983738		0.298682	0.981972		0.208461	0.981305		-0.181632	0.973256		-0.213263	0.979239		-0.271752	0.988693		0.66098	0.955276		0.250525	0.878847		0.348071	0.992243		0.50069	0.955093		0.0264	0.970468
-0.143958	0.984099		0.809014	0.962698		-1.39718	0.854747		0.0253752	0.980199		-0.598393	0.973884		-0.130706	0.89834		0.815315	0.878418		1.15384	0.946863		0.244263	0.979803		0.0495962	0.96062		-0.39929	0.941215		1.67135	0.905396		0.755104	0.922888		0.0656476	0.971865		0.135065	0.991554		0.586499	0.9682		1.02549	0.942272
-0.212094	0.982128		0.0890909	0.988971		-0.610193	0.968364		1.097	0.934106		-0.640828	0.973569		-0.690215	0.862979		0.468654	0.922682		0.42917	0.972317		-0.00840808	0.976447		0.0725125	0.956522		-0.33664	0.930395		0.277461	0.977582		2.12709	0.843548		-0.101792	0.986533		0.302106	0.989368		0.24513	0.967381		1.12779	0.932723
-0.184131	0.982003		0.516214	0.956189		0.719454	0.972379		0.288323	0.965104		-1.14984	0.954559		-0.536456	0.838038		0.0612161	0.982687		0.661652	0.959449		0.0176848	0.976892		0.20601	0.96588		-0.864433	0.849265		0.241792	0.98339		0.557433	0.893467		0.294724	0.968423		0.55429	0.988009		1.15279	0.950337		0.920096	0.931656
-0.347099	0.97583		0.765093	0.938839		-0.418422	0.944693		0.361961	0.969272		-1.16815	0.953894		-0.483571	0.833499		0.267303	0.964166		0.849158	0.927584		-0.112977	0.977204		0.70776	0.956839		-0.126976	0.966643		-0.0839697	0.982801		0.142404	0.945381			0.976737		0.324461	0.988115		-0.0522513	0.966857		1.09985	0.903101
-0.338476	0.970825		0.244776	0.957157		-0.401909	0.970421		0.0273345	0.966288		-0.870327	0.955883		-0.91523	0.803564		-0.0625464	0.985952		1.45573	0.912454		0.554401	0.966867		0.413242	0.948985		-0.312866	0.942926		-0.406529	0.977885		0.0584075	0.958713		-0.202338	0.982422		0.172691	0.986102		-0.121347	0.969653		1.22559	0.899212
-0.558295	0.967662		-0.186083	0.959711		0.151623	0.973925		0.103369	0.97215		-1.15751	0.948405		0.0497059	0.800875		-0.0166552	0.984907		0.587079	0.940977		0.166882	0.969417		-0.00538438	0.938431		-0.170103	0.960978		-1.07342	0.939935		0.393557	0.914712		0.288829	0.981524		0.407421	0.985153		-0.261016	0.967918		1.25637	0.903255
-0.527597	0.958697		-0.19496	0.977431		-0.263275	0.95447		0.274827	0.967772		-0.0779201	0.974572		0.288507	0.799984		0.505384	0.89482		0.0192556	0.974268		0.263554	0.963913		-0.59144	0.945685		-0.790259	0.852918		0.577529	0.953131		1.38905	0.849268			0.970846		0.167552	0.983704		1.00828	0.949934		1.12549	0.901535
-0.28033	0.962565		-0.594385	0.878244		-1.39307	0.838967		0.0487149	0.971602		-0.150792	0.962681		-0.147285	0.849023		0.0526526	0.974206		0.0512432	0.97827		-0.285903	0.970193		-0.698355	0.935419		-0.265003	0.934549		2.00719	0.869763		0.887701	0.917004		-0.104875	0.97595		0.368738	0.982612		0.531702	0.960075		0.933363	0.926397
-0.236649	0.955048		-0.00663291	0.87712		-1.45321	0.840416		-0.0878135	0.966418		-0.124547	0.965389		-0.343422	0.832533		-0.556354	0.964644		0.390498	0.964886		-0.320082	0.968232		-0.465958	0.934769		-0.521544	0.91921		0.308735	0.954159		0.0869662	0.967938		0.418983	0.92302		0.592992	0.980168		-0.25374	0.962929		1.34526	0.892976
-0.439315	0.937882		1.24284	0.842532		-1.46337	0.840765		-0.0454467	0.967679		0.976296	0.961647		-0.397873	0.85717		0.655397	0.870695		-0.0477261	0.965758		-0.391463	0.968357		-0.75702	0.920688		-0.458048	0.923281		0.203271	0.97108		0.113899	0.955061		-0.542692	0.963257		0.193479	0.980912		-0.297954	0.972699		0.957337	0.900941
2.72395	0.831661		2.80381	0.773295		-1.37736	0.840076		0.0749092	0.963471		-0.601815	0.972178		-0.152304	0.930501		0.167352	0.969122		1.80807	0.897322		0.0973818	0.966462		-0.291902	0.91375		-0.26752	0.937018		0.202521	0.979715		0.283146	0.952922		0.876349	0.972259		0.217142	0.980047		0.899479	0.936732		0.693952	0.886167
2.54157	0.808906		2.50041	0.774196		-1.33629	0.855689		-0.00231779	0.95903		0.510533	0.963407		0.348895	0.953142		-0.228766	0.966553		0.335881	0.907316		0.0954243	0.968333		0.00636205	0.92575		-0.950374	0.860265		-0.0366806	0.977751		-0.0488583	0.964505		0.258408	0.964321		0.405298	0.979669		-0.156523	0.961366		0.490015	0.910865
1.57503	0.837426		1.78828	0.803046		-1.39252	0.827965		0.504398	0.936828		-0.646988	0.959337		-0.163069	0.966774		0.948186	0.854348		0.421247	0.887901		-0.197469	0.965357		0.143383	0.922773		0.134678	0.955563		0.143452	0.984042		0.510966	0.915232		0.672185	0.955856		0.467507	0.979107		-0.0781202	0.966214		0.901641	0.882477
2.12887	0.75959		1.88257	0.671268		1.26068	0.855225		2.1822	0.708834		-0.859005	0.846623		1.55618	0.871231		2.79656	0.700589		1.05588	0.82414		1.09228	0.811854		1.45362	0.806072		2.04487	0.72594		0.179884	0.852428		3.77453	0.624228		2.68209	0.714194		1.31864	0.747106		0.919478	0.808066		1.73591	0.753892
1.8158	0.763422		2.92024	0.652743		1.4952	0.842189		2.75417	0.690455		-0.753335	0.856415		1.37919	0.890763		2.53024	0.69638		3.12274	0.748917		-0.2922	0.83109		1.6429	0.838853		1.96012	0.731079		-0.210427	0.86119		1.98541	0.645432		2.75636	0.706399		1.3308	0.741491		2.50835	0.765618		1.92357	0.726885
0.947091	0.788441		2.66426	0.654944		0.896632	0.833565		2.37158	0.699692		0.515616	0.854463		0.923803	0.888148		2.2609	0.693272		1.16744	0.829012		-1.22489	0.795492		1.73121	0.836336		1.88913	0.738983		-0.62294	0.843302		1.6598	0.668428		2.53317	0.734355		1.60448	0.730567		2.17729	0.781078		1.94372	0.725546
0.956944	0.79793		1.71672	0.701748		-0.127454	0.756495		1.59496	0.767732		-0.0807596	0.863555		0.796141	0.889256		2.07305	0.6904		0.824443	0.833885		-0.576889	0.824605		1.91222	0.83381		1.86385	0.75265		-0.151837	0.866654		1.07778	0.687539		2.46328	0.718187		2.02117	0.725742		2.1667	0.782473		1.918	0.702943
1.29633	0.793878		0.552085	0.721193		-0.690743	0.714102		1.74359	0.756207		0.289901	0.863876		1.00355	0.855925		2.14757	0.685224		1.46859	0.817221		1.28156	0.839439		2.02978	0.829308		1.89332	0.76237		-0.424618	0.859087		1.16671	0.688579		1.73985	0.735487		1.90923	0.712589		2.03666	0.774668		1.98789	0.726251
0.981006	0.79547		0.52832	0.721768		-0.779663	0.712502		1.72844	0.753706		-1.11418	0.850549		0.22914	0.805697		2.15613	0.687108		2.16864	0.802463		2.64576	0.837449		1.7163	0.824368		1.38292	0.78688		-0.749512	0.845808		0.836714	0.736093		2.85094	0.742658		1.21416	0.738016		1.73804	0.785231		1.9596	0.733502
0.928527	0.801413		0.842276	0.714197		-0.891707	0.708695		2.66148	0.673313		-0.626946	0.865273		1.09739	0.895077		2.09343	0.685491		2.07677	0.808339		2.36165	0.840451		1.83383	0.832349		1.87182	0.763866		0.00775032	0.870042		1.03993	0.72159		2.77989	0.726166		0.805536	0.738427		1.80921	0.782999		1.95794	0.717199
0.860777	0.796564		0.56592	0.714982		-0.761507	0.71426		2.40487	0.675055		-0.0452081	0.859278		0.44374	0.791449		2.11354	0.69047		2.70188	0.784587		1.67306	0.841281		2.0553	0.833203		1.03916	0.791365		-0.396352	0.839964		1.79146	0.678279		1.63792	0.685689		1.11424	0.742925		1.78277	0.780108		1.22302	0.794362
1.70148	0.775639		0.638963	0.715632		-0.434357	0.796748		2.1372	0.680947		0.452005	0.844575		0.136825	0.851985		2.10745	0.684552		1.10464	0.807573		1.36986	0.836682		2.10757	0.833793		1.81889	0.744935		-1.32073	0.803642		1.79762	0.655067		1.90814	0.726591		1.65615	0.729985		1.41001	0.806809		1.36793	0.781251
1.59093	0.767025		0.496053	0.715912		1.50721	0.849052		2.0701	0.67609		-0.731063	0.859959		-0.694689	0.816172		2.14375	0.684471		1.03757	0.815978		0.938885	0.845753		1.82189	0.827954		0.938424	0.792375		-0.0574574	0.864187		0.78153	0.727956		1.16181	0.706557		1.58017	0.692179		1.82793	0.776064		1.84617	0.727757
1.00016	0.797319		0.505997	0.718477		0.673507	0.826944		2.06684	0.680484		-0.495238	0.854308		-1.02077	0.850535		2.12025	0.689754		1.77704	0.788452		0.689114	0.847537		1.86425	0.833547		1.28644	0.785751		-0.27375	0.854199		1.00024	0.707227		0.960623	0.718948		1.26613	0.691908		1.93428	0.774484		2.1484	0.725351
0.814964	0.802116		1.44734	0.683593		-0.80876	0.700283		2.07218	0.679247		1.18766	0.835908		0.10467	0.871264		1.87293	0.68419		2.42622	0.794487		1.33282	0.848392		1.63847	0.81862		1.32404	0.780809		-0.389408	0.850273		0.681356	0.708601		0.879606	0.723163		1.54993	0.703032		2.0274	0.777684		2.88849	0.730093
0.980786	0.799993		2.01637	0.67762		-0.455464	0.760898		2.04963	0.675175		-0.606731	0.857111		0.149144	0.864739		1.91311	0.678187		0.84891	0.826933		1.25326	0.845275		1.68074	0.821551		1.17536	0.799725		-1.17317	0.790901		1.0436	0.691654		1.65699	0.736494		1.84872	0.705377		2.04698	0.771075		2.79032	0.676771
0.98822	0.794516		0.656937	0.704099		-0.510675	0.740764		1.97161	0.678564		-0.708664	0.859588		-0.602154	0.76564		1.92821	0.674232		0.72372	0.819206		1.43565	0.848118		1.36529	0.826736		1.10552	0.789501		-1.10448	0.809505		0.919622	0.693438		2.16767	0.732679		1.75215	0.704482		2.01007	0.770182		2.28795	0.690948
1.08326	0.797108		0.355862	0.713744		-0.652297	0.716117		1.99337	0.684765		0.373335	0.837852		0.0343892	0.815268		1.97737	0.678228		2.08188	0.762151		1.5703	0.84832		1.40371	0.823828		1.65349	0.766716		-0.0159285	0.847563		0.544867	0.714294		1.58054	0.734848		1.8283	0.701206		2.19375	0.769975		2.14361	0.70366
1.13308	0.786919		0.41512	0.71423		-0.694057	0.722789		1.91946	0.680922		0.629536	0.847273		0.022427	0.797022		1.96362	0.681089		2.42846	0.77679		1.34959	0.842966		1.45093	0.81513		1.56063	0.785019		1.13451	0.799262		1.27397	0.651178		1.81105	0.732994		1.89867	0.6926		2.21363	0.75879		1.56057	0.711017
0.955571	0.801453		0.553842	0.716661		-0.783766	0.744757		2.01202	0.679127		-0.688489	0.840001		0.29438	0.831247		2.06143	0.682176		0.721256	0.822476		1.54023	0.842823		2.79225	0.804696		0.888876	0.792642		0.768398	0.812638		1.05822	0.707334		2.10929	0.702015		1.45297	0.686223		2.05058	0.764738		0.39711	0.793679
1.09413	0.799519		0.501254	0.70532		1.73891	0.858084		1.8242	0.672949		-0.585374	0.844534		-0.464915	0.757853		1.89405	0.681316		1.4906	0.775891		1.21681	0.836094		2.97741	0.815059		0.566095	0.804506		0.150045	0.846181		1.36072	0.663387		2.2168	0.709254		0.653969	0.673893		2.03128	0.764471		1.212	0.736493
1.47825	0.790326		0.478332	0.705974		1.56695	0.846479		1.81723	0.670685		0.613028	0.824149		0.353887	0.776979		1.86974	0.672796		2.69142	0.750948		1.34291	0.836555		2.58168	0.821582		0.887692	0.806901		-0.272886	0.850747		2.29404	0.611687		2.2313	0.718317		1.39265	0.696623		1.8547	0.761984		1.10668	0.752767
1.69899	0.757912		1.53029	0.664162		0.712007	0.84141		1.79422	0.671368		0.955441	0.831235		0.400826	0.763812		1.81635	0.685351		2.09377	0.762863		1.42617	0.83377		1.90036	0.802411		0.766382	0.796019		0.137073	0.860309		0.920479	0.644021		1.17043	0.680853		1.57792	0.699414		1.88173	0.768533		0.639072	0.760841
2.91271	0.687852		2.59932	0.622114		0.325185	0.821213		1.88784	0.671157		0.555238	0.84281		-0.904698	0.665875		1.70713	0.670353		0.791552	0.806569		1.68699	0.830023		1.38062	0.800721		0.578503	0.799659		-0.0968388	0.856063		0.607237	0.675322		2.09104	0.718239		1.26684	0.674307		1.89045	0.770706		0.787182	0.739443
2.60877	0.70946		2.27459	0.619217		0.0567177	0.81688		1.78197	0.674412		0.921953	0.833109		0.692917	0.814625		1.80452	0.673185		0.738491	0.814592		1.60593	0.831808		1.04764	0.818451		0.426559	0.806283		-0.516149	0.83891		0.706861	0.675851		1.64466	0.707878		0.815556	0.650312		1.92467	0.768456		1.27376	0.753005
1.22889	0.767442		1.1843	0.683985		-0.65151	0.718502		1.86664	0.684854		-0.132901	0.842662		-0.680934	0.652105		2.28393	0.691816		1.19763	0.784444		1.39171	0.837374		1.11844	0.81525		0.497742	0.800944		-1.33633	0.791677		1.41159	0.638824		1.37924	0.710037		0.198216	0.638851		1.92843	0.769583		1.10929	0.766524
0.784825	0.793452		0.582107	0.707251		-0.404633	0.740252		1.72208	0.673779		0.465133	0.839965		-1.25048	0.671533		2.60905	0.69999		1.81565	0.773639		1.72198	0.836282		1.15705	0.808781		0.237968	0.79505		-0.142392	0.837475		0.914696	0.683466		1.15974	0.676794		-1.51948	0.522222		1.85396	0.765464		0.761992	0.777476
0.735574	0.795044		0.448253	0.707962		1.44391	0.852314		1.70586	0.675683		2.424	0.788459		-2.61307	0.662221		2.41438	0.692496		0.938741	0.793867		1.73934	0.839477		1.28057	0.808257		0.410158	0.796383		-0.599746	0.827414		0.549264	0.701475		1.26452	0.700495		0.209685	0.60499		1.77531	0.761778		1.22642	0.738682
0.683264	0.79907		0.501727	0.70292		1.72109	0.843398		1.6997	0.675676		0.968402	0.830211		-1.83704	0.856001		2.01646	0.687044		2.03009	0.742575		1.39606	0.831268		1.37784	0.804551		0.914726	0.793449		-0.789415	0.78123		0.48702	0.678014		1.01672	0.710739		0.387281	0.679075		1.74011	0.767086		1.00574	0.775174
0.794078	0.80172		0.871734	0.695563		0.40671	0.803168		1.68468	0.677906		-0.60617	0.824866		0.793811	0.894742		1.92296	0.678778		2.40379	0.758624		1.6142	0.83411		1.29698	0.800934		1.64606	0.776098		-0.221708	0.844121		0.5286	0.683874		0.751954	0.721915		0.573155	0.689458		1.77563	0.768254		1.62043	0.728332
1.86822	0.762507		0.523013	0.70623		-0.493091	0.71755		1.74329	0.674101		-0.687788	0.823273		0.196181	0.895734		2.04462	0.675028		1.0464	0.800016		1.63622	0.822448		1.65828	0.794413		1.74091	0.762505		-0.570948	0.827015		0.952562	0.657537		0.851335	0.698978		0.182652	0.679685		1.82601	0.764649		1.31204	0.754995
1.33819	0.763761		1.30534	0.673695		-0.790932	0.698325		1.77065	0.671063		-0.382404	0.828997		-0.281041	0.888457		2.11496	0.675686		0.597325	0.819756		1.59549	0.815679		0.164081	0.807212		1.58552	0.770123		-1.11871	0.798532		2.51573	0.58847		0.677039	0.692058		0.31528	0.663594		2.00566	0.777659		1.27637	0.72433
0.811796	0.785147		1.19781	0.669105		-0.532815	0.717216		1.62828	0.675419		-0.516333	0.823645		-0.789342	0.827923		2.10094	0.67244		1.11696	0.791843		1.76713	0.824618		0.276289	0.806708		1.60568	0.761955		-0.0123949	0.842142		2.24707	0.621267		0.694635	0.702001		0.0533684	0.692972		1.97562	0.781964		1.19896	0.76341
0.780484	0.932079		-0.112297	0.895803		0.485738	0.969699		1.18316	0.864395		-1.09931	0.953635		0.189365	0.969514		0.205082	0.971487		1.01927	0.823236		2.28452	0.881107		1.31962	0.929495		0.157396	0.970178		1.39529	0.922099		-0.174982	0.964522		0.203606	0.949193		-0.0205445	0.958783		-0.881733	0.909731		2.18551	0.89092
0.414435	0.954145		-0.0931283	0.907839		-0.0975739	0.973085		1.39708	0.888895		-0.0230108	0.976496		0.706397	0.945528		0.05731	0.971398		0.620112	0.738228		2.1677	0.91405		0.761895	0.948188		0.0255186	0.979338		3.03482	0.837325		-0.17629	0.964623		0.196841	0.949494		-0.0452123	0.97663		0.122822	0.960941		2.79089	0.836553
0.0947476	0.960368		-0.446878	0.887836		-1.04274	0.902188		1.14248	0.918404		-1.04162	0.962744		0.522497	0.912398		-0.115445	0.974182		0.15219	0.703311		1.82222	0.926754		0.986822	0.953874		0.181252	0.970778		1.53848	0.884135		0.0269076	0.958741		0.5195	0.854624		-0.143396	0.977063		0.0445497	0.958575		2.65122	0.86323
-0.00145606	0.9609		-0.439684	0.888047		-0.269507	0.975726		1.21379	0.902921		-1.20327	0.952714		-0.482711	0.867451		-0.108331	0.978484		0.146188	0.70313		1.34816	0.938834		0.617793	0.957841		0.0313455	0.984057		2.9361	0.840536		-0.083298	0.952142		0.254461	0.857323		-0.0147013	0.979537		-0.244532	0.954261		1.80806	0.938525
0.150618	0.975255		-0.751708	0.859126		-0.462691	0.975975		0.691738	0.952189		-1.33179	0.931081		0.473866	0.926912		-0.0199571	0.984136		0.0469372	0.749101		1.07441	0.938078		0.321002	0.960563		-0.140122	0.9816		1.99332	0.858983		-0.00374064	0.968934		-0.0482758	0.973335		0.08486	0.982513		-1.5922	0.885039		0.525772	0.95915
0.107364	0.979694		-0.650891	0.885005		-0.167437	0.980963		-0.167478	0.952681		-0.303865	0.971815		-0.166179	0.881828		-0.548035	0.924226		-0.106938	0.822201		1.20138	0.947773		0.411669	0.963962		0.0875467	0.980403		1.12539	0.904806		0.26846	0.970377		-0.0105356	0.980676		-0.154019	0.984784		-2.38619	0.86546		2.55393	0.871459
0.307575	0.980838		-0.166975	0.91173		-0.950163	0.942579		-0.467744	0.944675		-1.00161	0.959846		0.484954	0.914532		-0.0381307	0.962097		0.345449	0.865212		0.975533	0.959461		0.62755	0.968881		-0.313672	0.985443		1.18562	0.941211		0.951608	0.962892		0.0838777	0.965956		-0.184977	0.988788		-2.56253	0.868802		2.48794	0.885899
0.0755229	0.983854		-0.109006	0.914024		-0.18488	0.985552		-0.514777	0.952934		-1.73624	0.939244		0.355137	0.921917		0.640991	0.950268		1.92574	0.882529		0.869853	0.962074		0.523356	0.960612		-0.593638	0.970379		1.03936	0.934825		1.51761	0.960546		0.102006	0.983129		-0.110195	0.989376		-2.14109	0.898038		2.53978	0.850418
-0.0918367	0.98207		-0.557666	0.885646		-1.39591	0.893207		-0.557816	0.950602		-1.72698	0.920379		-0.0204122	0.885817		0.518319	0.961998		0.279474	0.95824		0.370357	0.978418		0.549248	0.969164		0.0653209	0.960438		0.796325	0.977791		1.32253	0.955433		0.201088	0.928096		0.255079	0.987636		-2.38412	0.890864		1.7777	0.935503
0.0779166	0.986078		-0.831369	0.839578		0.271625	0.986289		-0.600199	0.94852		0.295847	0.980993		0.167092	0.949129		0.0804593	0.978561		0.146689	0.97782		0.941	0.948151		0.666016	0.976834		-0.0428825	0.990719		1.475	0.914693		-0.197656	0.966725		0.25422	0.911399		-0.290005	0.991916		-2.63716	0.88249		1.12866	0.964144
-0.141583	0.983377		-0.472274	0.957013		-0.779428	0.950762		-0.320973	0.980386		-1.15702	0.956419		-0.0512299	0.971787		0.195236	0.979832		0.056577	0.98541		0.753109	0.953991		0.5434	0.988896		-0.414279	0.975248		0.902879	0.969595		-0.211522	0.973394		-0.142417	0.982261		-0.136681	0.99267		-2.43865	0.884959		0.220101	0.964042
-0.134278	0.991028		0.212368	0.978234		-1.61405	0.824018		-0.585023	0.962491		-0.269488	0.986421		-0.247442	0.990163		-0.216684	0.977363		-0.177319	0.982639		0.393303	0.97899		0.34707	0.989105		-0.438997	0.981544		0.653005	0.977404		-0.153199	0.959623		0.00978918	0.989349		-0.379335	0.994435		-2.66983	0.883568		0.0165086	0.97379
0.205743	0.98748		-0.308501	0.981136		-0.49032	0.975712		-0.514654	0.976279		-0.678581	0.983342		0.217319	0.993911		-0.307695	0.959773		-0.196064	0.988297		0.521244	0.968734		0.0778983	0.991318		0.366604	0.951225		0.908784	0.964968		-0.493098	0.934612		0.056928	0.981173		-0.194516	0.995845		-2.59134	0.910473		0.698688	0.987179
0			0			0			0			0			0			0			0			0			0			0			0			0			0			0			0			0
0.0209474	0.991154		-0.59059	0.952928		-0.206654	0.988502		-0.381297	0.978021		-1.02201	0.97116		-0.111495	0.987348		-0.539313	0.908426		0.190737	0.989831		1.18991	0.94859		0.281909	0.989576		-0.162543	0.99231		0.880884	0.966517		-0.0929894	0.986195		0.045754	0.991824		-0.0649695	0.995358		-0.410218	0.9706		1.20866	0.966167
-0.124293	0.986859		-0.359772	0.967418		-0.476793	0.972214		-0.416131	0.96549		-1.74177	0.933293		-0.155434	0.965289		-0.249598	0.972753		0.031717	0.989185		0.646091	0.966351		-0.158839	0.98616		-0.329967	0.987305		0.442594	0.978827		0.145646	0.978664		-0.0677622	0.966331		-0.037003	0.994487		-0.594184	0.966996		0.976214	0.960891
0.129233	0.983264		-1.07283	0.920576		-1.12394	0.923887		-0.51688	0.954043		-1.35948	0.976959		0.21898	0.940449		-0.285596	0.972745		0.102618	0.987476		0.729705	0.958613		-0.103733	0.975578		0.153341	0.979549		0.637032	0.960921		0.167882	0.962924		0.307453	0.83296		0.153556	0.993827		-2.09065	0.881318		0.725088	0.963946
0.0617844	0.986038		0.500513	0.981135		-1.8875	0.809545		-0.489279	0.970613		-1.27697	0.963313		0.0866127	0.905775		0.50762	0.955775		0.95778	0.960269		0.765507	0.95332		0.127494	0.962773		-0.0326862	0.991154		2.58014	0.843976		0.262005	0.974638		0.122576	0.963239		-0.0594504	0.992579		-2.00485	0.934284		1.72418	0.930511
-0.00635098	0.984466		-0.21941	0.981409		-1.10051	0.932227		0.582347	0.969064		-1.31941	0.955446		-0.472896	0.879555		0.160959	0.97694		0.233106	0.978906		0.512836	0.944166		0.150411	0.960859		0.0299645	0.972045		1.18624	0.933147		1.63399	0.94777		-0.0448643	0.976563		0.10759	0.990677		-2.34621	0.889818		1.82648	0.922574
0.0216118	0.985765		0.207713	0.979314		0.229134	0.986104		-0.226331	0.958636		-1.82842	0.926951		-0.319137	0.853492		-0.246479	0.972804		0.465588	0.968406		0.538929	0.960926		0.283908	0.964878		-0.497828	0.943536		1.15058	0.941708		0.0643343	0.970425		0.351652	0.952801		0.359774	0.989022		-1.43856	0.940834		1.61878	0.919832
-0.141357	0.981222		0.456592	0.959886		-0.908742	0.940524		-0.152693	0.969962		-1.84673	0.928087		-0.266252	0.845502		-0.0403918	0.984916		0.653094	0.940912		0.408268	0.958226		0.785658	0.962462		0.239628	0.953222		0.824815	0.972368		-0.350694	0.971486			0.982956		0.129945	0.988058		-2.6436	0.859254		1.79853	0.892068
-0.132733	0.97956		-0.0637249	0.961313		-0.89223	0.960379		-0.487319	0.946854		-1.54891	0.934093		-0.697911	0.819645		-0.370241	0.953812		1.25966	0.92728		1.07565	0.966443		0.49114	0.949485		0.0537383	0.969025		0.502255	0.980068		-0.434691	0.969113		-0.14541	0.970292		-0.0218247	0.98568		-2.71269	0.87817		1.92428	0.889888
-0.352552	0.977633		-0.494584	0.958116		-0.338698	0.982591		-0.411284	0.957675		-1.83609	0.922689		0.267024	0.806855		-0.32435	0.938786		0.391014	0.949838		0.688127	0.96478		0.0725139	0.936204		0.196501	0.955825		-0.164639	0.985739		-0.0995408	0.971307		0.345757	0.980711		0.212905	0.983683		-2.85236	0.858168		1.95506	0.890531
-0.321855	0.968245		-0.50346	0.966751		-0.753596	0.958961		-0.239827	0.967836		-0.756501	0.975501		0.505825	0.803407		0.197689	0.956755		-0.176809	0.970483		0.784799	0.931125		-0.513542	0.943981		-0.423655	0.949291		1.48631	0.930123		0.895956	0.952311			0.983869		-0.0269641	0.981797		-1.58306	0.943995		1.82418	0.890261
-0.0745872	0.965338		-0.902885	0.880321		-1.88339	0.794855		-0.465939	0.958587		-0.829373	0.958754		0.0700335	0.860043		-0.255042	0.954629		-0.144821	0.977726		0.235342	0.951387		-0.620457	0.931875		0.101602	0.957336		2.91598	0.810909		0.394603	0.964371		-0.0479467	0.966782		0.174223	0.98163		-2.05964	0.908632		1.63205	0.917724
-0.0309065	0.958867		-0.315134	0.905029		-1.94353	0.787871		-0.602467	0.947911		-0.803128	0.972674		-0.126103	0.84181		-0.864048	0.897286		0.194433	0.968108		0.201163	0.948831		-0.38806	0.933651		-0.154939	0.961731		1.21752	0.894212		-0.406132	0.943843		0.475911	0.893084		0.398477	0.980233		-2.84508	0.84948		2.04394	0.884246
-0.233573	0.946675		0.934344	0.894446		-1.95369	0.788386		-0.560101	0.948909		0.297715	0.979867		-0.180554	0.869886		0.347702	0.941712		-0.24379	0.960625		0.129782	0.947402		-0.679122	0.921048		-0.0914439	0.967874		1.11206	0.91833		-0.379199	0.953338		-0.485764	0.981521		-0.00103707	0.979582		-2.8893	0.871996		1.65602	0.890196
2.92969	0.816195		2.49531	0.830401		-1.86768	0.789003		-0.439745	0.948005		-1.2804	0.95761		0.0650144	0.932493		-0.140343	0.964154		1.612	0.917368		0.618626	0.942997		-0.214003	0.91666		0.0990846	0.963572		1.11131	0.942159		-0.209952	0.957768		0.933277	0.961789		0.022626	0.979298		-1.69187	0.921447		1.39264	0.87682
2.74732	0.790514		2.19191	0.828708		-1.82661	0.80605		-0.516972	0.936467		-0.168048	0.974659		0.566214	0.944783		-0.53646	0.901856		0.139817	0.911154		0.616669	0.941794		0.0842603	0.926967		-0.58377	0.952258		0.872104	0.971637		-0.541957	0.917764		0.315336	0.946146		0.210782	0.97641		-2.74787	0.861418		1.1887	0.899056
1.78077	0.824528		1.47978	0.85794		-1.88284	0.777362		-0.0102555	0.940173		-1.32557	0.953363		0.0542497	0.963235		0.640491	0.920292		0.225183	0.890402		0.323776	0.94412		0.221281	0.923958		0.501282	0.921247		1.05224	0.955042		0.017868	0.95748		0.729113	0.973543		0.272991	0.976831		-2.66946	0.85584		1.60033	0.871985
2.33462	0.737125		1.57406	0.717636		0.770363	0.839798		1.66755	0.739619		-1.53759	0.855954		1.77349	0.864684		2.48887	0.6942		0.859818	0.823764		1.61353	0.810433		1.53152	0.819577		2.41148	0.722607		1.08867	0.816389		3.28144	0.742404		2.73901	0.683241		1.12413	0.745322		-1.67187	0.845217		2.4346	0.734567
2.02154	0.742478		2.61174	0.695814		1.00488	0.847436		2.23952	0.729525		-1.43192	0.868353		1.59651	0.884387		2.22255	0.69014		2.92668	0.764898		0.229044	0.839369		1.7208	0.845742		2.32672	0.728864		0.698357	0.85013		1.49231	0.747892		2.81329	0.683511		1.13629	0.741712		-0.082999	0.871891		2.62226	0.71054
1.15283	0.77396		2.35576	0.699219		0.406312	0.840525		1.85693	0.734475		-0.162965	0.879992		1.14112	0.884788		1.9532	0.689972		0.971372	0.834799		-0.703644	0.832422		1.80911	0.848067		2.25574	0.731667		0.285844	0.865993		1.1667	0.772233		2.5901	0.71386		1.40996	0.731844		-0.414057	0.86668		2.64241	0.708552
1.16269	0.78317		1.40822	0.736351		-0.617775	0.744188		1.0803	0.787051		-0.75934	0.878532		1.01346	0.887802		1.76535	0.683963		0.628378	0.838608		-0.0556446	0.838699		1.99012	0.843314		2.23045	0.745321		0.756947	0.853258		0.58468	0.772673		2.52021	0.692577		1.82665	0.726944		-0.424644	0.865675		2.61669	0.687711
1.50207	0.772431		0.243585	0.738237		-1.18106	0.678318		1.22894	0.77473		-0.38868	0.876508		1.22087	0.857135		1.83987	0.679962		1.27253	0.828424		1.8028	0.821856		2.10768	0.842018		2.25993	0.751324		0.484166	0.871529		0.673608	0.769285		1.79678	0.706612		1.71472	0.71447		-0.554687	0.864253		2.68658	0.711457
1.18675	0.776792		0.219819	0.739991		-1.26998	0.671449		1.21378	0.775397		-1.79276	0.841603		0.446459	0.814316		1.84844	0.681348		1.97258	0.81407		3.16701	0.812801		1.7942	0.838183		1.74953	0.773207		0.159273	0.867504		0.343616	0.80531		2.90787	0.717348		1.01965	0.737912		-0.853305	0.865734		2.65828	0.717984
1.13427	0.78656		0.533775	0.738696		-1.38203	0.663577		2.14683	0.706613		-1.30553	0.877847		1.31471	0.890563		1.78574	0.679397		1.88071	0.820339		2.88289	0.808077		1.91173	0.843855		2.23842	0.750964		0.916534	0.840747		0.546836	0.793652		2.83682	0.702747		0.61102	0.737135		-0.782131	0.869795		2.65663	0.703482
1.06652	0.780634		0.25742	0.732834		-1.25183	0.671799		1.89022	0.70252		-0.723789	0.873843		0.661059	0.800739		1.80584	0.682693		2.50581	0.798429		2.1943	0.807397		2.1332	0.842906		1.40576	0.778907		0.512433	0.861752		1.29836	0.78288		1.69485	0.655471		0.919724	0.742435		-0.808576	0.868924		1.9217	0.773378
1.90722	0.752827		0.330462	0.733546		-0.924677	0.760484		1.62254	0.714545		-0.226575	0.873504		0.354143	0.856456		1.79975	0.674333		0.908576	0.815124		1.8911	0.809282		2.18547	0.844393		2.18549	0.729995		-0.411949	0.858945		1.30453	0.78311		1.96507	0.694386		1.46164	0.729722		-1.18133	0.859309		2.06662	0.762307
1.79667	0.743821		0.187552	0.7312		1.01689	0.852229		1.55545	0.709464		-1.40964	0.857652		-0.47737	0.825378		1.83606	0.676627		0.841506	0.825225		1.46013	0.812454		1.89979	0.839487		1.30503	0.77581		0.851327	0.862988		0.288432	0.77213		1.21874	0.673432		1.38566	0.69366		-0.763417	0.866648		2.54486	0.713017
1.2059	0.782094		0.197497	0.735523		0.183187	0.835455		1.55219	0.710263		-1.17382	0.866776		-0.803453	0.856598		1.81255	0.688062		1.58097	0.803825		1.21036	0.821517		1.94215	0.842583		1.65305	0.764974		0.635034	0.850402		0.507138	0.778497		1.01755	0.681987		1.07161	0.69274		-0.657069	0.870651		2.84708	0.712182
1.02071	0.791073		1.13884	0.721784		-1.29908	0.668393		1.55752	0.704835		0.509081	0.867774		0.321988	0.87364		1.56524	0.680885		2.23016	0.810244		1.85407	0.820032		1.71637	0.827692		1.69064	0.760893		0.519376	0.853405		0.188258	0.768083		0.936535	0.685274		1.35541	0.702929		-0.563948	0.859785		3.58718	0.713737
1.18653	0.78508		1.70787	0.717154		-0.945785	0.730834		1.53497	0.706653		-1.28531	0.861297		0.366463	0.867945		1.60541	0.672936		0.652846	0.835227		1.77451	0.817116		1.75864	0.830816		1.54197	0.77579		-0.264381	0.847521		0.550499	0.769107		1.71392	0.706396		1.65421	0.705341		-0.544361	0.861988		3.48901	0.663254
1.19396	0.778841		0.348436	0.719339		-1.001	0.711627		1.45696	0.705696		-1.38724	0.858856		-0.384836	0.777064		1.62051	0.668471		0.527656	0.828569		1.95689	0.821505		1.44319	0.834886		1.47212	0.772046		-0.195695	0.857571		0.426524	0.75361		2.22459	0.70377		1.55763	0.70467		-0.58127	0.86359		2.98663	0.681188
1.289	0.779932		0.0473612	0.725571		-1.14262	0.682813		1.47871	0.711268		-0.305245	0.866317		0.251708	0.822283		1.66968	0.6741		1.88581	0.781993		2.09154	0.823092		1.48161	0.831223		2.02009	0.756402		0.892856	0.822545		0.0517684	0.745444		1.63747	0.703426		1.63378	0.699392		-0.397597	0.865459		2.84229	0.689963
1.33883	0.769218		0.106619	0.726385		-1.18438	0.682437		1.4048	0.707166		-0.0490452	0.868372		0.239746	0.804901		1.65593	0.676989		2.23239	0.795081		1.87084	0.813296		1.52882	0.826133		1.92723	0.773334		2.04329	0.778117		0.780872	0.757314		1.86798	0.702233		1.70416	0.69165		-0.37771	0.84777		2.25926	0.693658
1.16131	0.789936		0.245342	0.732446		-1.27409	0.702982		1.49736	0.705438		-1.36707	0.83828		0.511699	0.837231		1.75373	0.680452		0.525191	0.830119		2.06148	0.812177		2.87015	0.811234		1.25548	0.791499		1.67718	0.768641		0.565118	0.754895		2.16622	0.676168		1.25845	0.686759		-0.540768	0.848587		1.0958	0.771812
1.29987	0.785169		0.192753	0.721675		1.24859	0.854456		1.30955	0.696895		-1.26396	0.847918		-0.247596	0.769576		1.58636	0.678106		1.29454	0.793607		1.73806	0.797997		3.05531	0.824489		0.9327	0.797565		1.05883	0.812678		0.867621	0.755038		2.27373	0.682585		0.459453	0.675552		-0.560059	0.850794		1.91069	0.71909
1.684	0.77279		0.169831	0.720811		1.07663	0.855051		1.30257	0.697933		-0.0655533	0.853148		0.571205	0.784746		1.56204	0.669404		2.49536	0.770377		1.86416	0.804174		2.65958	0.828704		1.2543	0.791522		0.635899	0.843888		1.80094	0.747653		2.28822	0.692783		1.19813	0.695139		-0.736646	0.859934		1.80536	0.731729
1.90474	0.736055		1.22179	0.702193		0.221686	0.84334		1.27956	0.696014		0.27686	0.858655		0.618145	0.770194		1.50865	0.68362		1.89771	0.78179		1.94741	0.807362		1.97826	0.808742		1.13299	0.775503		1.04586	0.821734		0.427381	0.761185		1.22735	0.64852		1.38341	0.699485		-0.70961	0.855577		1.33776	0.741739
3.11845	0.669355		2.29082	0.665625		-0.165135	0.822541		1.37318	0.693522		-0.123343	0.856221		-0.687379	0.680984		1.39943	0.667335		0.595488	0.817515		2.20823	0.803795		1.45851	0.809978		0.945107	0.795892		0.811945	0.843512		0.114139	0.763321		2.14797	0.687159		1.07232	0.675898		-0.700894	0.855285		1.48587	0.719281
2.81451	0.690155		1.96609	0.662426		-0.433603	0.805871		1.26731	0.699442		0.243373	0.856371		0.910236	0.819724		1.49683	0.671042		0.542427	0.827353		2.12718	0.803832		1.12554	0.826173		0.793163	0.804446		0.392635	0.846237		0.213762	0.773517		1.70159	0.674016		0.62104	0.651498		-0.666676	0.858874		1.97245	0.733444
1.43464	0.752952		0.875801	0.71172		-1.14183	0.687889		1.35199	0.710914		-0.811482	0.845802		-0.463615	0.670093		1.97624	0.692049		1.00156	0.801641		1.91296	0.808025		1.19634	0.820477		0.864346	0.787196		-0.427541	0.844603		0.918487	0.76119		1.43617	0.675602		0.00370022	0.640525		-0.662911	0.859294		1.80797	0.748788
0.990568	0.782687		0.273607	0.7177		-0.894953	0.708782		1.20742	0.699411		-0.213448	0.863818		-1.03316	0.689178		2.30135	0.697855		1.61958	0.793723		2.24322	0.807845		1.23495	0.819709		0.604572	0.790825		0.766392	0.840353		0.421598	0.769423		1.21666	0.636828		-1.71399	0.523992		-0.737389	0.854454		1.46068	0.760769
0.941317	0.78603		0.139753	0.720694		0.953587	0.844916		1.19121	0.699814		1.74542	0.823543		-2.39575	0.676179		2.10669	0.696311		0.742677	0.812327		2.26058	0.807547		1.35847	0.818798		0.776763	0.778112		0.309038	0.84019		0.0561655	0.756414		1.32144	0.660611		0.0151693	0.607151		-0.816033	0.854751		1.92511	0.72259
0.889007	0.792384		0.193226	0.721177		1.23077	0.855112		1.18505	0.69939		0.289821	0.848604		-1.61972	0.860012		1.70876	0.691401		1.83403	0.766252		1.91731	0.792711		1.45574	0.813965		1.28133	0.769687		0.119369	0.829179		-0.006078	0.754914		1.07365	0.675625		0.192766	0.679509		-0.851238	0.856207		1.70443	0.758008
0.999821	0.794053		0.563233	0.718378		-0.0836104	0.805242		1.17003	0.703106		-1.28475	0.817401		1.01113	0.889716		1.61527	0.674834		2.20772	0.778829		2.13544	0.797868		1.37488	0.81351		2.01267	0.764567		0.687076	0.854732		0.0355012	0.750468		0.808882	0.681178		0.378639	0.686726		-0.815719	0.85868		2.31912	0.711859
2.07397	0.741861		0.214512	0.719207		-0.983412	0.695871		1.22863	0.699499		-1.36637	0.812159		0.413499	0.894417		1.73692	0.673199		0.850332	0.813042		2.15747	0.778902		1.73618	0.804647		2.10751	0.756419		0.337836	0.845418		0.459464	0.761928		0.908263	0.660647		-0.0118635	0.679821		-0.765336	0.862442		2.01073	0.734608
1.54393	0.745024		0.996844	0.702832		-1.28125	0.665105		1.256	0.695718		-1.06098	0.82457		-0.0637226	0.89108		1.80726	0.672767		0.40126	0.827385		2.11673	0.772498		0.24198	0.813838		1.95212	0.7611		-0.20993	0.83867		2.02263	0.73234		0.733967	0.650745		0.120764	0.664399		-0.585683	0.858852		1.97506	0.709798
1.01754	0.775446		0.88931	0.698155		-1.02314	0.683204		1.11363	0.697127		-1.19491	0.817385		-0.572023	0.837398		1.79325	0.669441		0.920896	0.805856		2.28838	0.787362		0.354188	0.813331		1.97229	0.758312		0.896389	0.813695		1.75397	0.747569		0.751563	0.661768		-0.141147	0.691681		-0.615727	0.85226		1.89765	0.748229
0.759537	0.931076		0.478292	0.869431		0.692392	0.965617		1.56446	0.824322		-0.0772976	0.953588		0.30086	0.965561		0.744395	0.85776		0.828529	0.83123		1.0946	0.93882		1.03771	0.925546		0.319939	0.968683		0.514408	0.967036		-0.0819924	0.963451		0.157852	0.94593		0.044425	0.958794		-0.471515	0.906078		0.976844	0.932989
0.393488	0.955245		0.497462	0.864494		0.10908	0.978123		1.77837	0.858521		0.998997	0.94205		0.817892	0.963409		0.596623	0.864354		0.429374	0.742826		0.977783	0.958835		0.479986	0.949301		0.188062	0.979149		2.15394	0.878646		-0.0833007	0.969564		0.151087	0.950296		0.0197572	0.974634		0.53304	0.961594		1.58223	0.871992
0.0738001	0.961637		0.143712	0.90369		-0.83609	0.918108		1.52378	0.889524		-0.0196077	0.980955		0.633992	0.940602		0.423869	0.927384		-0.0385475	0.702985		0.632306	0.96425		0.704913	0.956531		0.343795	0.969953		0.657596	0.938785		0.119897	0.957579		0.473746	0.856675		-0.0784264	0.976517		0.454768	0.964312		1.44256	0.902037
-0.0224035	0.964299		0.150906	0.901394		-0.0628528	0.977285		1.59509	0.867511		-0.181262	0.975997		-0.371216	0.901709		0.430982	0.943014		-0.0445497	0.703024		0.158248	0.953079		0.335884	0.959833		0.193889	0.981372		2.05522	0.871113		0.00969142	0.952146		0.208707	0.864212		0.0502682	0.981252		0.165686	0.961548		0.599399	0.957855
0.129671	0.972275		-0.161118	0.906474		-0.256037	0.977551		1.07303	0.937824		-0.309782	0.968602		0.58536	0.952023		0.519356	0.912651		-0.1438	0.747174		-0.115503	0.956892		0.0390932	0.957595		0.0224213	0.982795		1.11243	0.904981		0.0892488	0.964074		-0.0940298	0.97612		0.14983	0.98366		-1.18198	0.890692		-0.682892	0.952016
0.0864162	0.978261		-0.0603011	0.901857		0.0392169	0.980238		0.213818	0.9635		0.718143	0.943896		-0.0546836	0.919568		-0.0087215	0.987828		-0.297675	0.820601		0.0114694	0.964124		0.12976	0.964087		0.25009	0.978556		0.244506	0.951339		0.36145	0.967671		-0.0562896	0.982181		-0.0890496	0.985061		-1.97597	0.872533		1.34527	0.920331
0.286627	0.979986		0.423615	0.883871		-0.743509	0.952597		-0.0864477	0.961629		0.0203975	0.977012		0.596448	0.941862		0.501183	0.907012		0.154711	0.864275		-0.21438	0.949535		0.345641	0.966047		-0.151129	0.985504		0.304739	0.975989		1.0446	0.95734		0.0381237	0.963844		-0.120007	0.987935		-2.15231	0.869158		1.27927	0.922556
0.0545755	0.984941		0.481584	0.892145		0.0217738	0.986516		-0.13348	0.966788		-0.714231	0.968852		0.466632	0.950688		1.1803	0.801752		1.73501	0.892237		-0.320059	0.964142		0.241447	0.961941		-0.431095	0.970778		0.158474	0.979211		1.6106	0.957266		0.0562523	0.986443		-0.0452252	0.98726		-1.73088	0.910498		1.33112	0.885568
-0.112784	0.984777		0.0329241	0.908004		-1.18925	0.906415		-0.17652	0.968632		-0.704975	0.962832		0.0910828	0.922526		1.05763	0.828749		0.0887367	0.956093		-0.819556	0.953552		0.267339	0.969532		0.227864	0.960599		-0.0845589	0.984185		1.41552	0.947415		0.155334	0.92836		0.320048	0.985651		-1.9739	0.903371		0.569036	0.952504
0.0569692	0.985712		-0.240779	0.899725		0.478278	0.980083		-0.218903	0.967281		1.31786	0.936307		0.278587	0.97125		0.619773	0.877888		-0.0440485	0.974646		-0.248913	0.986846		0.384107	0.974449		0.119661	0.987928		0.594114	0.969838		-0.104667	0.968819		0.208466	0.916182		-0.225035	0.989153		-2.22695	0.879471		-0.0800039	0.970975
-0.162531	0.987905		0.118316	0.954043		-0.572774	0.959195		0.0603238	0.984618		-0.135011	0.986157		0.0602651	0.983682		0.734549	0.878585		-0.13416	0.981721		-0.436804	0.987626		0.26149	0.984463		-0.251736	0.976821		0.0219952	0.985613		-0.118533	0.969952		-0.188171	0.982853		-0.0717117	0.99137		-2.02844	0.896558		-0.988563	0.954031
-0.155225	0.99134		0.802958	0.921251		-1.40739	0.843103		-0.203726	0.978579		0.752521	0.962251		-0.135947	0.987615		0.322629	0.946909		-0.368056	0.971725		-0.79661	0.97267		0.0651611	0.985551		-0.276454	0.986811		-0.227879	0.988028		-0.0602095	0.960228		-0.0359648	0.989754		-0.314365	0.993157		-2.25961	0.88317		-1.19216	0.959353
0.184795	0.985324		0.282089	0.963931		-0.283667	0.972703		-0.133357	0.984277		0.343427	0.98475		0.328814	0.983778		0.231619	0.975418		-0.386802	0.978934		-0.668668	0.982214		-0.204011	0.985872		0.529148	0.949711		0.0279003	0.990662		-0.400109	0.936793		0.0111741	0.974795		-0.129546	0.993399		-2.18113	0.912032		-0.509976	0.972763
-0.0209474	0.991154		0.59059	0.952928		0.206654	0.988502		0.381297	0.978021		1.02201	0.97116		0.111495	0.987348		0.539313	0.908426		-0.190737	0.989831		-1.18991	0.94859		-0.281909	0.989576		0.162543	0.99231		-0.880884	0.966517		0.0929894	0.986195		-0.045754	0.991824		0.0649695	0.995358		0.410218	0.9706		-1.20866	0.966167
0			0			0			0			0			0			0			0			0			0			0			0			0			0			0			0			0
-0.145241	0.99296		0.230818	0.988688		-0.270139	0.983686		-0.0348345	0.978816		-0.719764	0.979908		-0.0439388	0.984791		0.289715	0.957902		-0.15902	0.99052		-0.543822	0.987214		-0.440748	0.986533		-0.167424	0.989042		-0.438289	0.98943		0.238635	0.980517		-0.113516	0.972705		0.0279666	0.995813		-0.183966	0.990912		-0.23245	0.983036
0.108285	0.986228		-0.482242	0.983144		-0.917285	0.938932		-0.135584	0.977967		-0.337476	0.973029		0.330475	0.969204		0.253717	0.966136		-0.0881193	0.98609		-0.460207	0.989472		-0.385643	0.982565		0.315884	0.981373		-0.243851	0.986762		0.260871	0.967958		0.261699	0.822965		0.218525	0.993451		-1.68044	0.890712		-0.483576	0.98416
0.0408369	0.987732		1.0911	0.913406		-1.68084	0.830364		-0.107982	0.979539		-0.254966	0.983327		0.198108	0.942187		1.04693	0.806421		0.767042	0.964661		-0.424406	0.985449		-0.154415	0.965712		0.129857	0.991248		1.69925	0.902279		0.354995	0.972163		0.0768217	0.96329		0.00551911	0.991445		-1.59463	0.949062		0.515513	0.963471
-0.0272984	0.989693		0.37118	0.970847		-0.89386	0.94013		0.963644	0.947515		-0.297401	0.986579		-0.361401	0.917077		0.700273	0.864561		0.0423681	0.97969		-0.677076	0.983836		-0.131498	0.96609		0.192508	0.972002		0.305361	0.976837		1.72698	0.941109		-0.0906183	0.972642		0.17256	0.991098		-1.936	0.888373		0.617813	0.953303
0.000664307	0.988687		0.798303	0.925282		0.435787	0.981058		0.154965	0.978882		-0.806416	0.97313		-0.207642	0.896182		0.292835	0.952969		0.274851	0.971843		-0.650984	0.979944		0.00199938	0.965979		-0.335285	0.943115		0.269692	0.979997		0.157324	0.968176		0.305898	0.958871		0.424744	0.990936		-1.02834	0.95095		0.41012	0.955061
-0.162304	0.98725		1.04718	0.886687		-0.702088	0.955859		0.228603	0.977612		-0.824727	0.970161		-0.154757	0.891473		0.498922	0.918448		0.462356	0.948173		-0.781645	0.977282		0.503749	0.965488		0.402172	0.951015		-0.0560693	0.985194		-0.257705	0.974345			0.982178		0.194915	0.988731		-2.23338	0.862058		0.589869	0.929735
-0.153681	0.984613		0.526865	0.930526		-0.685576	0.971652		-0.106023	0.968185		-0.5269	0.970739		-0.586417	0.864088		0.169072	0.976253		1.06893	0.934889		-0.114267	0.963367		0.209231	0.947612		0.216282	0.96526		-0.378629	0.979823		-0.341701	0.972736		-0.191164	0.966642		0.0431448	0.985896		-2.30247	0.881953		0.715616	0.927748
-0.3735	0.98212		0.0960059	0.979427		-0.132044	0.982225		-0.0299879	0.971271		-0.814078	0.965938		0.378519	0.865609		0.214963	0.979995		0.200277	0.953754		-0.501786	0.968271		-0.209395	0.935867		0.359044	0.950883		-1.04552	0.942259		-0.00655141	0.967264		0.300003	0.983467		0.277875	0.984252		-2.44214	0.860008		0.746392	0.931318
-0.342802	0.976948		0.0871298	0.980755		-0.546942	0.968036		0.14147	0.971881		0.265507	0.966003		0.61732	0.859827		0.737002	0.826227		-0.367546	0.962949		-0.405114	0.979153		-0.795451	0.9438		-0.261112	0.945909		0.605429	0.952529		0.988945	0.945825			0.985445		0.0380054	0.98276		-1.17284	0.955777		0.615515	0.923657
-0.0955347	0.966831		-0.312295	0.942389		-1.67674	0.818784		-0.0846424	0.972645		0.192635	0.959621		0.181528	0.904072		0.284271	0.948006		-0.335559	0.972657		-0.954571	0.97596		-0.902366	0.93138		0.264145	0.952428		2.03509	0.863359		0.487592	0.965367		-0.0937006	0.967245		0.239192	0.983213		-1.64942	0.916046		0.423387	0.940218
-0.0518539	0.958842		0.275456	0.874145		-1.73688	0.809902		-0.221171	0.966002		0.218881	0.95464		-0.0146082	0.89104		-0.324735	0.985824		0.00369594	0.968392		-0.98875	0.976139		-0.669969	0.9324		0.00760399	0.95685		0.336635	0.951828		-0.313143	0.949555		0.430157	0.894709		0.463446	0.980806		-2.43487	0.844393		0.835279	0.925933
-0.25452	0.952088		1.52493	0.805557		-1.74704	0.808777		-0.178804	0.966936		1.31972	0.945546		-0.0690594	0.905173		0.887015	0.792117		-0.434528	0.948419		-1.06013	0.973871		-0.961031	0.919823		0.0710995	0.964369		0.231172	0.967044		-0.28621	0.954601		-0.531518	0.98179		0.0639324	0.979544		-2.47908	0.876831		0.44736	0.926216
2.90874	0.820669		3.0859	0.75873		-1.66102	0.811569		-0.0584482	0.961323		-0.258388	0.977577		0.176509	0.95674		0.398971	0.938275		1.42127	0.92771		-0.571287	0.974904		-0.495912	0.920926		0.261628	0.95933		0.230422	0.976638		-0.116963	0.955992		0.887523	0.961349		0.0875955	0.979162		-1.28165	0.929865		0.183976	0.914724
2.72637	0.78879		2.7825	0.770783		-1.61995	0.826535		-0.135675	0.956105		0.85396	0.946508		0.677709	0.95544		0.00285301	0.978425		-0.0509203	0.911452		-0.573244	0.974282		-0.197649	0.930723		-0.421227	0.950542		-0.00878024	0.978015		-0.448967	0.927588		0.269582	0.944516		0.275752	0.976333		-2.33765	0.861793		-0.0199618	0.932668
1.75982	0.821202		2.07037	0.7772		-1.67618	0.79782		0.371041	0.934543		-0.30356	0.959182		0.165745	0.960687		1.1798	0.784476		0.0344454	0.890084		-0.866137	0.970644		-0.0606283	0.922704		0.663826	0.914577		0.171352	0.983779		0.110857	0.951833		0.683359	0.977354		0.33796	0.97728		-2.25925	0.851588		0.391665	0.912173
2.31367	0.744064		2.16465	0.656212		0.977017	0.826633		2.04884	0.708426		-0.515578	0.84911		1.88499	0.865526		3.02818	0.691576		0.669081	0.823487		0.423616	0.818695		1.24961	0.82502		2.57402	0.719181		0.207784	0.849945		3.37442	0.734843		2.69326	0.685001		1.18909	0.748425		-1.26165	0.812436		1.22594	0.802742
2.00059	0.745191		3.20233	0.647137		1.21153	0.838193		2.62082	0.690933		-0.409907	0.847916		1.708	0.880708		2.76186	0.687632		2.73594	0.766915		-0.960868	0.83055		1.43889	0.849928		2.48927	0.726022		-0.182527	0.862135		1.5853	0.743043		2.76754	0.687568		1.20126	0.746216		0.327219	0.831714		1.41359	0.775551
1.13189	0.773715		2.94635	0.640764		0.612965	0.838412		2.23823	0.697859		0.859043	0.837271		1.25262	0.882888		2.49252	0.685518		0.780635	0.831605		-1.89356	0.791359		1.5272	0.851537		2.41828	0.731361		-0.59504	0.848961		1.25969	0.768976		2.54435	0.716405		1.47493	0.73688		-0.00383907	0.843521		1.43375	0.773693
1.14174	0.78408		1.99881	0.666166		-0.411121	0.754125		1.4616	0.771062		0.262668	0.854945		1.12495	0.882628		2.30467	0.682461		0.437641	0.834449		-1.24556	0.82419		1.70821	0.842117		2.39299	0.74487		-0.123937	0.869767		0.677669	0.771965		2.47445	0.695973		1.89162	0.73307		-0.0144257	0.840221		1.40803	0.748208
1.48112	0.773335		0.834175	0.692378		-0.97441	0.691459		1.61024	0.752671		0.633328	0.858488		1.33236	0.865403		2.37919	0.676371		1.08179	0.82598		0.612889	0.854019		1.82577	0.845506		2.42247	0.751195		-0.396717	0.865065		0.766598	0.769455		1.75102	0.706392		1.77969	0.721642		-0.144469	0.843288		1.47791	0.772437
1.1658	0.776446		0.810409	0.685844		-1.06333	0.683075		1.59508	0.757313		-0.770748	0.863941		0.557954	0.825764		2.38775	0.678365		1.78184	0.810639		1.97709	0.853448		1.51229	0.843535		1.91207	0.763689		-0.721611	0.852577		0.436605	0.809139		2.86211	0.718037		1.08462	0.7413		-0.443087	0.846878		1.44962	0.779851
1.11332	0.785832		1.12436	0.679145		-1.17537	0.674193		2.52813	0.669019		-0.283519	0.854055		1.4262	0.877438		2.32505	0.677407		1.68997	0.81729		1.69298	0.859982		1.62982	0.845888		2.40097	0.748982		0.0356507	0.87341		0.639826	0.794122		2.79107	0.708949		0.675989	0.741271		-0.371913	0.845827		1.44796	0.765162
1.04557	0.77905		0.84801	0.687379		-1.04517	0.682012		2.27151	0.672494		0.298219	0.854354		0.772553	0.809351		2.34516	0.683018		2.31507	0.799768		1.00439	0.8632		1.85129	0.841646		1.5683	0.771367		-0.368451	0.84449		1.39135	0.778337		1.6491	0.657035		0.984694	0.746412		-0.398358	0.846669		0.71304	0.825979
1.88627	0.756931		0.921052	0.692636		-0.718023	0.766567		2.00384	0.678978		0.795433	0.824284		0.465638	0.860207		2.33907	0.675193		0.717839	0.8099		0.701187	0.852429		1.90356	0.842779		2.34804	0.731966		-1.29283	0.81082		1.39752	0.781713		1.91932	0.694541		1.52661	0.735631		-0.771113	0.837725		0.857958	0.827398
1.77572	0.744617		0.778142	0.699523		1.22354	0.843094		1.93674	0.672715		-0.387636	0.868556		-0.365875	0.830575		2.37537	0.67599		0.650768	0.823451		0.270216	0.863488		1.61788	0.846198		1.46757	0.767425		-0.0295571	0.868306		0.381421	0.780762		1.17298	0.67616		1.45063	0.699598		-0.3532	0.843262		1.33619	0.778933
1.18495	0.782525		0.788087	0.69385		0.38984	0.835929		1.93348	0.678905		-0.151811	0.844309		-0.691958	0.850421		2.35187	0.679718		1.39024	0.80187		0.0204459	0.862786		1.66024	0.850067		1.81559	0.762114		-0.24585	0.856761		0.600127	0.7802		0.971797	0.686003		1.13658	0.698797		-0.246852	0.84072		1.63842	0.770874
0.999759	0.791911		1.72943	0.66327		-1.09243	0.683171		1.93882	0.680697		1.53109	0.812801		0.433483	0.868529		2.10455	0.673211		2.03942	0.812898		0.664156	0.862314		1.43446	0.832814		1.85319	0.759417		-0.361508	0.852564		0.281247	0.773057		0.890781	0.68601		1.42038	0.705982		-0.15373	0.843776		2.37851	0.790324
1.16558	0.784227		2.29846	0.643122		-0.739131	0.742953		1.91627	0.674297		-0.263303	0.861047		0.477958	0.865348		2.14473	0.666899		0.462108	0.828938		0.584596	0.859626		1.47673	0.836528		1.70451	0.770656		-1.14526	0.798002		0.643489	0.773932		1.66817	0.708238		1.71918	0.707684		-0.134144	0.840273		2.28034	0.735373
1.17301	0.777931		0.939026	0.670791		-0.794342	0.725029		1.83825	0.679043		-0.365236	0.864749		-0.273341	0.794392		2.15983	0.662679		0.336918	0.825298		0.766982	0.863814		1.16128	0.841232		1.63466	0.769069		-1.07658	0.816078		0.519513	0.758732		2.17884	0.699691		1.6226	0.70845		-0.171052	0.843025		1.77797	0.744725
1.26805	0.781121		0.637951	0.69195		-0.935964	0.699429		1.86001	0.684925		0.716763	0.810909		0.363203	0.836743		2.20899	0.667131		1.69507	0.782178		0.90163	0.862305		1.1997	0.832651		2.18264	0.753925		0.0119718	0.85011		0.144758	0.760436		1.59171	0.698773		1.69875	0.704154		0.0126206	0.836237		1.63363	0.757396
1.31788	0.768224		0.697209	0.690563		-0.977724	0.695024		1.7861	0.681921		0.972963	0.840224		0.351241	0.824629		2.19524	0.67024		2.04166	0.796619		0.680925	0.861144		1.24692	0.832844		2.08978	0.771044		1.16241	0.800027		0.873861	0.751654		1.82222	0.700626		1.76913	0.697078		0.0325075	0.816091		1.05059	0.759849
1.14037	0.790551		0.835932	0.696445		-1.06743	0.715078		1.87866	0.681145		-0.345062	0.850042		0.623194	0.848952		2.29305	0.671207		0.334454	0.824237		0.871566	0.859192		2.58824	0.81805		1.41802	0.780054		0.796298	0.808892		0.658108	0.76367		2.12047	0.681536		1.32342	0.69036		-0.130551	0.824061		-0.112867	0.818879
1.27893	0.78485		0.783343	0.688462		1.45524	0.843466		1.69084	0.674114		-0.241947	0.84871		-0.136101	0.794586		2.12567	0.670136		1.1038	0.790364		0.548143	0.853674		2.7734	0.832426		1.09524	0.7878		0.177946	0.843794		0.960611	0.751439		2.22798	0.682312		0.524423	0.679585		-0.149842	0.823371		0.702023	0.784878
1.66305	0.774377		0.760421	0.684151		1.28328	0.850776		1.68387	0.671553		0.956455	0.79952		0.6827	0.808253		2.10136	0.663088		2.30462	0.771043		0.674243	0.849906		2.37767	0.83484		1.41684	0.785542		-0.244985	0.853436		1.89393	0.74124		2.24247	0.696489		1.2631	0.699606		-0.326428	0.830618		0.596701	0.792466
1.88379	0.737213		1.81238	0.646005		0.42834	0.846251		1.66086	0.672356		1.29887	0.812671		0.72964	0.796695		2.04796	0.672145		1.70697	0.781429		0.757501	0.846839		1.69635	0.812712		1.29553	0.767379		0.164973	0.859029		0.52037	0.760675		1.1816	0.648735		1.44838	0.70348		-0.299392	0.836707		0.129096	0.798083
3.09751	0.672805		2.88141	0.606547		0.0415185	0.829368		1.75448	0.669211		0.898666	0.837617		-0.575884	0.712882		1.93875	0.65838		0.40475	0.813841		1.01832	0.842724		1.1766	0.818731		1.10765	0.787538		-0.0689385	0.858855		0.207128	0.767766		2.10222	0.684171		1.13729	0.682373		-0.290676	0.835481		0.277205	0.783545
2.79356	0.692229		2.55668	0.594088		-0.226949	0.81297		1.64861	0.672165		1.26538	0.814792		1.02173	0.833035		2.03614	0.659936		0.351689	0.821353		0.937263	0.842267		0.843627	0.83097		0.955706	0.795765		-0.488249	0.843004		0.306752	0.774914		1.65584	0.670958		0.68601	0.65543		-0.256459	0.837032		0.763788	0.802496
1.41369	0.749736		1.46639	0.647204		-0.935177	0.703002		1.73328	0.679634		0.210527	0.850469		-0.35212	0.70396		2.51555	0.682874		0.810823	0.801807		0.723044	0.849328		0.914428	0.825837		1.02689	0.781346		-1.30842	0.798277		1.01148	0.760621		1.39041	0.675847		0.0686697	0.646851		-0.252693	0.837215		0.59931	0.80822
0.96962	0.78007		0.864196	0.680619		-0.6883	0.720638		1.58872	0.670795		0.80856	0.824662		-0.921669	0.71897		2.84066	0.693435		1.42884	0.796368		1.05331	0.847427		0.953041	0.828053		0.767115	0.782611		-0.114492	0.841148		0.514587	0.776894		1.17091	0.636504		-1.64902	0.530609		-0.327171	0.831908		0.252016	0.813747
0.920369	0.783304		0.730343	0.677933		1.16024	0.832862		1.57251	0.672144		2.76743	0.755371		-2.28425	0.70296		2.646	0.68461		0.551939	0.815113		1.07067	0.853445		1.07656	0.8255		0.939306	0.771921		-0.571846	0.829748		0.149155	0.767775		1.27569	0.659419		0.0801388	0.615765		-0.405815	0.829822		0.716443	0.788753
0.86806	0.789984		0.783816	0.67576		1.43742	0.850113		1.56635	0.672374		1.31183	0.820607		-1.50823	0.855903		2.24807	0.676409		1.64329	0.768999		0.727395	0.84853		1.17383	0.818604		1.44387	0.767632		-0.761515	0.78803		0.0869114	0.760961		1.02789	0.677533		0.257735	0.685132		-0.441021	0.834634		0.495766	0.81559
0.978873	0.791488		1.15382	0.666815		0.123043	0.814778		1.55133	0.673566		-0.262742	0.838198		1.12262	0.87797		2.15458	0.666852		2.01698	0.782892		0.94553	0.850138		1.09297	0.818918		2.17521	0.765648		-0.193808	0.848382		0.128491	0.758155		0.763128	0.681535		0.443609	0.690613		-0.405501	0.832354		1.11045	0.78136
2.05302	0.742677		0.805102	0.686993		-0.776758	0.710654		1.60993	0.669682		-0.34436	0.834217		0.524994	0.876919		2.27623	0.66375		0.659595	0.812096		0.967556	0.841859		1.45427	0.811299		2.27005	0.758561		-0.543048	0.831799		0.552453	0.75981		0.862509	0.659667		0.053106	0.683891		-0.355118	0.833185		0.802061	0.799741
1.52298	0.74316		1.58743	0.654546		-1.0746	0.679533		1.6373	0.668272		-0.0389764	0.834133		0.0477723	0.876463		2.34658	0.66356		0.210523	0.821929		0.926819	0.83664		-0.0399296	0.818061		2.11466	0.76288		-1.09081	0.805504		2.11562	0.724717		0.688213	0.649487		0.185734	0.670931		-0.175465	0.827652		0.766394	0.776498
0.996591	0.772839		1.4799	0.624507		-0.816482	0.695802		1.49492	0.672652		-0.172905	0.832002		-0.460528	0.84128		2.33256	0.661722		0.730159	0.804051		1.09847	0.843181		0.0722785	0.819153		2.13483	0.758791		0.0155055	0.841402		1.84696	0.741825		0.705809	0.660378		-0.0761778	0.696048		-0.205509	0.834959		0.688988	0.80845
0.904778	0.926965		0.247474	0.869715		0.962531	0.94972		1.59929	0.795378		0.642466	0.94455		0.344799	0.945558		0.45468	0.942172		0.987549	0.821323		1.63843	0.915829		1.47846	0.933219		0.487363	0.95247		0.952698	0.955443		-0.320628	0.952511		0.271368	0.920641		0.0164584	0.956657		-0.287549	0.908112		1.20929	0.927601
0.538729	0.950805		0.266643	0.866627		0.379219	0.969371		1.81321	0.834114		1.71876	0.903766		0.861831	0.971838		0.306908	0.946023		0.588395	0.73736		1.5216	0.947535		0.920734	0.946809		0.355486	0.97234		2.59223	0.875099		-0.321936	0.960875		0.264604	0.922146		-0.00820931	0.973245		0.717005	0.958012		1.81468	0.874459
0.219041	0.960981		-0.0871065	0.89273		-0.565951	0.947384		1.55861	0.869724		0.700156	0.964338		0.677931	0.963797		0.134153	0.96964		0.120473	0.703436		1.17613	0.958102		1.14566	0.950401		0.511219	0.951409		1.09589	0.927597		-0.118738	0.953531		0.587263	0.849055		-0.106393	0.974395		0.638733	0.963831		1.67501	0.903376
0.122837	0.963096		-0.0799119	0.89878		0.207286	0.972824		1.62993	0.845311		0.538502	0.96736		-0.327278	0.941984		0.141267	0.974802		0.114471	0.703484		0.702071	0.956759		0.776632	0.952638		0.361313	0.973018		2.49351	0.869585		-0.228944	0.949652		0.322223	0.858284		0.0223016	0.979288		0.349652	0.96144		0.831849	0.961571
0.274912	0.970584		-0.391936	0.892153		0.0141022	0.975679		1.10787	0.922833		0.409982	0.975075		0.629299	0.973388		0.229641	0.973415		0.0152202	0.748838		0.428319	0.960713		0.479841	0.956999		0.189845	0.96893		1.55072	0.900803		-0.149386	0.963575		0.0194864	0.944664		0.121863	0.98161		-0.998016	0.900042		-0.450442	0.961717
0.231657	0.976103		-0.291119	0.901504		0.309356	0.973546		0.248653	0.960732		1.43791	0.909117		-0.0107448	0.958072		-0.298437	0.960763		-0.138655	0.822099		0.555292	0.968797		0.570508	0.956614		0.417514	0.961695		0.682795	0.943537		0.122815	0.968965		0.0572266	0.94994		-0.117016	0.983941		-1.79201	0.886105		1.57772	0.91087
0.431868	0.975708		0.192796	0.886147		-0.47337	0.968378		-0.0516132	0.961371		0.740161	0.964074		0.640387	0.967729		0.211467	0.970268		0.313732	0.863143		0.329442	0.960747		0.78639	0.959937		0.0162954	0.988863		0.743028	0.971059		0.805962	0.957574		0.15164	0.950658		-0.147974	0.98707		-1.96835	0.884337		1.51172	0.919514
0.199816	0.980847		0.250765	0.892722		0.291913	0.974481		-0.0986457	0.963781		0.0055326	0.976955		0.510571	0.976449		0.890589	0.909804		1.89403	0.88139		0.223763	0.97082		0.682195	0.953245		-0.263671	0.984381		0.596764	0.968825		1.37196	0.9526		0.169768	0.966383		-0.0731918	0.986957		-1.54691	0.919269		1.56357	0.887145
0.0324566	0.98242		-0.197894	0.903144		-0.919112	0.938598		-0.141685	0.966598		0.0147894	0.974728		0.135022	0.959076		0.767917	0.926021		0.247757	0.956356		-0.275734	0.969838		0.708087	0.96141		0.395288	0.930131		0.353731	0.985759		1.17688	0.94458		0.268851	0.905648		0.292081	0.985019		-1.78993	0.913058		0.801486	0.959107
0.20221	0.982506		-0.471597	0.887811		0.748418	0.962786		-0.184068	0.96292		2.03762	0.894104		0.322526	0.986511		0.330057	0.953117		0.114972	0.974453		0.29491	0.981609		0.824855	0.969671		0.287085	0.978297		1.0324	0.958474		-0.343302	0.956436		0.321982	0.900039		-0.253002	0.989742		-2.04298	0.891709		0.152446	0.97372
-0.0172901	0.985639		-0.112502	0.961217		-0.302635	0.976771		0.0951583	0.9739		0.584753	0.973997		0.104204	0.987894		0.444833	0.953106		0.0248601	0.982886		0.107018	0.984465		0.702239	0.980875		-0.084312	0.988391		0.460285	0.985959		-0.357168	0.968131		-0.0746544	0.962039		-0.0996782	0.990422		-1.84447	0.90582		-0.756112	0.960107
-0.00998444	0.988389		0.57214	0.933424		-1.13725	0.888638		-0.168891	0.973732		1.47228	0.92908		-0.0920085	0.968725		0.0329138	0.975071		-0.209036	0.979075		-0.252788	0.982731		0.505909	0.981262		-0.10903	0.984765		0.210411	0.988014		-0.298845	0.955755		0.0775514	0.967087		-0.342332	0.992885		-2.07565	0.892579		-0.959705	0.964827
0.330036	0.978664		0.051271	0.975656		-0.0135275	0.97175		-0.0985229	0.977329		1.06319	0.959869		0.372752	0.957971		-0.0580969	0.980682		-0.227781	0.985256		-0.124846	0.986831		0.236738	0.982942		0.696572	0.911818		0.46619	0.986329		-0.638744	0.922407		0.12469	0.953872		-0.157513	0.994171		-1.99716	0.91799		-0.277526	0.972048
0.124293	0.986859		0.359772	0.967418		0.476793	0.972214		0.416131	0.96549		1.74177	0.933293		0.155434	0.965289		0.249598	0.972753		-0.031717	0.989185		-0.646091	0.966351		0.158839	0.98616		0.329967	0.987305		-0.442594	0.978827		-0.145646	0.978664		0.0677622	0.966331		0.037003	0.994487		0.594184	0.966996		-0.976214	0.960891
0.145241	0.99296		-0.230818	0.988688		0.270139	0.983686		0.0348345	0.978816		0.719764	0.979908		0.0439388	0.984791		-0.289715	0.957902		0.15902	0.99052		0.543822	0.987214		0.440748	0.986533		0.167424	0.989042		0.438289	0.98943		-0.238635	0.980517		0.113516	0.972705		-0.0279666	0.995813		0.183966	0.990912		0.23245	0.983036
0			0			0			0			0			0			0			0			0			0			0			0			0			0			0			0			0
0.253526	0.987288		-0.71306	0.977254		-0.647146	0.964833		-0.100749	0.985845		0.382288	0.960915		0.374414	0.986676		-0.0359981	0.981356		0.0709012	0.990506		0.0836149	0.990098		0.0551058	0.982527		0.483308	0.959384		0.194438	0.986691		0.0222359	0.966586		0.375215	0.832313		0.190559	0.994773		-1.49647	0.90178		-0.251126	0.989995
0.186078	0.986887		0.860285	0.933857		-1.4107	0.879199		-0.0731477	0.980684		0.464798	0.975753		0.242046	0.976447		0.757218	0.922543		0.926063	0.960942		0.119417	0.989442		0.286334	0.970974		0.297281	0.98993		2.13754	0.896329		0.116359	0.981983		0.190338	0.942764		-0.0224474	0.993175		-1.41066	0.955159		0.747964	0.965329
0.117942	0.988785		0.140362	0.97737		-0.623721	0.956662		0.998478	0.928959		0.422363	0.982831		-0.317463	0.957719		0.410557	0.949425		0.201389	0.980196		-0.133254	0.985033		0.30925	0.96648		0.359932	0.97042		0.743651	0.97128		1.48834	0.945385		0.0228979	0.945884		0.144593	0.992598		-1.75203	0.90156		0.850263	0.956152
0.145905	0.988166		0.567485	0.943216		0.705927	0.960089		0.1898	0.963676		-0.0866524	0.988909		-0.163703	0.936367		0.00311924	0.976857		0.433871	0.969139		-0.107161	0.985755		0.442748	0.971384		-0.167861	0.96295		0.707982	0.976703		-0.0813115	0.978272		0.419414	0.938063		0.396777	0.991102		-0.844372	0.956771		0.64257	0.960425
-0.0170636	0.986175		0.816364	0.906436		-0.431949	0.974037		0.263438	0.971572		-0.104963	0.986009		-0.110818	0.927236		0.209206	0.974695		0.621377	0.943216		-0.237823	0.988967		0.944498	0.968906		0.569596	0.928647		0.38222	0.987141		-0.49634	0.972715			0.955606		0.166948	0.990298		-2.04941	0.877534		0.82232	0.935971
-0.00844008	0.98458		0.296047	0.942684		-0.415437	0.982562		-0.0711883	0.974198		0.192864	0.981557		-0.542478	0.904626		-0.120643	0.982067		1.22795	0.928534		0.429555	0.974975		0.649979	0.960505		0.383706	0.957582		0.0596609	0.985617		-0.580337	0.969312		-0.077648	0.948035		0.0151782	0.987776		-2.11851	0.896604		0.948067	0.932552
-0.228259	0.984368		-0.134812	0.98009		0.138095	0.969201		0.00484658	0.9786		-0.0943141	0.982996		0.422458	0.906089		-0.0747521	0.965426		0.359297	0.952758		0.0420362	0.981107		0.231353	0.94592		0.526468	0.930127		-0.607233	0.958098		-0.245187	0.983031		0.413519	0.963704		0.249908	0.987189		-2.25818	0.876428		0.978843	0.940178
-0.197561	0.978374		-0.143689	0.984518		-0.276803	0.976924		0.176304	0.971245		0.985271	0.938115		0.661259	0.901433		0.447287	0.93469		-0.208526	0.97078		0.138708	0.9755		-0.354703	0.949723		-0.0936877	0.964129		1.04372	0.950539		0.75031	0.959008			0.968031		0.0100388	0.984857		-0.988876	0.959193		0.847966	0.937633
0.0497061	0.971863		-0.543114	0.920852		-1.4066	0.866503		-0.049808	0.975381		0.912399	0.936309		0.225467	0.93666		-0.00544435	0.962859		-0.176538	0.979411		-0.410749	0.982735		-0.461618	0.937783		0.431569	0.943868		2.47338	0.860285		0.248957	0.972296		0.0198155	0.963001		0.211225	0.984259		-1.46546	0.927121		0.655837	0.9527
0.0933869	0.96336		0.0446381	0.875837		-1.46674	0.859282		-0.186336	0.97034		0.938644	0.922746		0.0293306	0.929659		-0.61445	0.955242		0.162716	0.971514		-0.444928	0.980334		-0.229221	0.940412		0.175028	0.954511		0.774925	0.943843		-0.551778	0.945267		0.543673	0.879916		0.43548	0.981264		-2.2509	0.862025		1.06773	0.927696
-0.109279	0.959224		1.29412	0.821975		-1.4769	0.857039		-0.14397	0.968642		2.03949	0.904859		-0.0251205	0.931617		0.5973	0.91206		-0.275507	0.96061		-0.516309	0.979364		-0.520283	0.928944		0.238524	0.962705		0.669461	0.960944		-0.524845	0.95754		-0.418002	0.956669		0.0359659	0.980937		-2.29511	0.888877		0.679811	0.932189
3.05398	0.823481		2.85508	0.76588		-1.39088	0.857995		-0.0236137	0.963448		0.461376	0.9667		0.220448	0.961071		0.109255	0.964822		1.58029	0.91696		-0.0274644	0.978212		-0.0551641	0.921999		0.429052	0.949897		0.668711	0.974682		-0.355598	0.959648		1.00104	0.94607		0.059629	0.980465		-1.09768	0.936003		0.416426	0.9211
2.87161	0.794375		2.55168	0.775387		-1.34982	0.86941		-0.100841	0.959373		1.57372	0.909894		0.721648	0.940443		-0.286862	0.951873		0.1081	0.912462		-0.0294219	0.97997		0.2431	0.930817		-0.253803	0.963886		0.429509	0.983691		-0.687602	0.908799		0.383098	0.923379		0.247785	0.979979		-2.15368	0.877697		0.212489	0.940291
1.90506	0.826024		1.83955	0.791184		-1.40605	0.844721		0.405876	0.931075		0.416204	0.943193		0.209683	0.931551		0.890089	0.900925		0.193466	0.892789		-0.322315	0.977407		0.38012	0.925549		0.83125	0.882604		0.609642	0.981673		-0.127778	0.960477		0.796875	0.96722		0.309994	0.978763		-2.07528	0.866693		0.624115	0.916002
2.45891	0.738828		1.93384	0.666675		1.24716	0.826083		2.08368	0.68887		0.204186	0.831963		1.92893	0.850147		2.73847	0.724297		0.828101	0.831096		0.967438	0.81964		1.69036	0.824277		2.74144	0.707577		0.646074	0.844581		3.13579	0.720433		2.80678	0.719321		1.16113	0.747486		-1.07768	0.816693		1.45839	0.786927
2.14583	0.739326		2.97151	0.651368		1.48167	0.833174		2.65565	0.671617		0.309856	0.820344		1.75194	0.862111		2.47215	0.717636		2.89496	0.765448		-0.417046	0.841731		1.87964	0.849447		2.65669	0.715219		0.255763	0.864999		1.34667	0.73962		2.88105	0.71563		1.17329	0.743431		0.511185	0.832629		1.64604	0.766658
1.27713	0.767563		2.71553	0.649724		0.883105	0.842072		2.27306	0.680795		1.57881	0.786865		1.29656	0.867485		2.2028	0.715763		0.939655	0.841598		-1.34973	0.808763		1.96795	0.853523		2.5857	0.717219		-0.156751	0.85821		1.02105	0.761967		2.65786	0.74065		1.44696	0.731135		0.180127	0.845032		1.6662	0.763999
1.28698	0.776938		1.76799	0.680646		-0.140982	0.777885		1.49643	0.757394		0.982432	0.812709		1.16889	0.865103		2.01495	0.711055		0.596661	0.845755		-0.701735	0.8328		2.14896	0.851131		2.56042	0.729537		0.314353	0.870392		0.439034	0.760592		2.58797	0.714619		1.86365	0.72903		0.16954	0.840772		1.64048	0.741078
1.62637	0.766081		0.603356	0.701877		-0.704271	0.726715		1.64507	0.740611		1.35309	0.817264		1.3763	0.865324		2.08947	0.707056		1.24081	0.832711		1.15671	0.845852		2.26652	0.844573		2.5899	0.734124		0.0415721	0.871401		0.527963	0.753101		1.86454	0.719551		1.75172	0.715782		0.0394968	0.843069		1.71036	0.76233
1.31104	0.769925		0.579591	0.696642		-0.793191	0.720855		1.62991	0.738845		-0.0509838	0.858061		0.601893	0.83748		2.09804	0.708151		1.94086	0.816186		2.52092	0.843608		1.95304	0.842486		2.07949	0.747352		-0.283322	0.86025		0.19797	0.786326		2.97563	0.743902		1.05665	0.738163		-0.259121	0.84899		1.68207	0.769929
1.25856	0.780816		0.893547	0.694809		-0.905234	0.713563		2.56296	0.649515		0.436245	0.825545		1.47014	0.850451		2.03533	0.705687		1.84899	0.822151		2.2368	0.852077		2.07057	0.850261		2.56839	0.730926		0.47394	0.870874		0.40119	0.776954		2.90458	0.732349		0.648023	0.738437		-0.187948	0.846019		1.68041	0.755554
1.19081	0.774359		0.617191	0.697807		-0.775034	0.719073		2.30635	0.654081		1.01798	0.818664		0.816492	0.812446		2.05544	0.710163		2.47409	0.800602		1.54821	0.854271		2.29204	0.850357		1.73573	0.754861		0.0698382	0.854141		1.15271	0.773542		1.76261	0.661442		0.956727	0.743168		-0.214392	0.846359		0.94549	0.822789
2.03151	0.752008		0.690234	0.703757		-0.447884	0.792512		2.03868	0.663057		1.5152	0.776084		0.509577	0.85731		2.04935	0.70278		0.876859	0.816959		1.24501	0.84877		2.34431	0.847861		2.51546	0.713971		-0.854543	0.831695		1.15888	0.770005		2.03283	0.714892		1.49864	0.731666		-0.587147	0.83697		1.09041	0.813576
1.92096	0.740068		0.547324	0.707579		1.49368	0.834114		1.97158	0.65678		0.332128	0.843416		-0.321936	0.834535		2.08565	0.705461		0.809789	0.832367		0.814039	0.856269		2.05863	0.84514		1.635	0.748909		0.408732	0.86887		0.142786	0.758944		1.2865	0.676551		1.42266	0.69629		-0.169234	0.844013		1.56864	0.764869
1.33019	0.77728		0.557268	0.704595		0.65998	0.840492		1.96832	0.660372		0.567953	0.817996		-0.648019	0.839835		2.06215	0.711618		1.54926	0.807417		0.564268	0.858392		2.10099	0.847173		1.98301	0.741716		0.19244	0.860269		0.361492	0.764824		1.08531	0.682935		1.10862	0.695376		-0.0628858	0.840568		1.87087	0.756017
1.145	0.787329		1.49861	0.676295		-0.822287	0.717744		1.97365	0.657695		2.25085	0.764507		0.477422	0.857327		1.81483	0.704178		2.19844	0.813807		1.20798	0.860142		1.87521	0.833537		2.02061	0.73901		0.0767819	0.859941		0.0426119	0.754292		1.0043	0.690524		1.39241	0.703121		0.0302355	0.841305		2.61096	0.768474
1.31082	0.779131		2.06764	0.659363		-0.468992	0.772297		1.95111	0.656858		0.456461	0.833359		0.521897	0.853983		1.85501	0.69887		0.621129	0.840619		1.12842	0.855674		1.91747	0.837516		1.87193	0.749146		-0.706975	0.81741		0.404853	0.759848		1.78169	0.727791		1.69121	0.704318		0.0498222	0.839526		2.51279	0.723512
1.31826	0.771694		0.708208	0.680311		-0.524202	0.757227		1.87309	0.65972		0.354527	0.846077		-0.229402	0.814509		1.87011	0.693613		0.495939	0.834181		1.3108	0.85904		1.60203	0.845174		1.80209	0.749697		-0.638289	0.82926		0.280878	0.744131		2.29236	0.71814		1.59463	0.704856		0.0129139	0.843742		2.01042	0.734063
1.41329	0.77376		0.407133	0.698548		-0.665824	0.731617		1.89484	0.664487		1.43653	0.758601		0.407142	0.847763		1.91927	0.698666		1.85409	0.782638		1.44545	0.858447		1.64045	0.840826		2.35006	0.738835		0.450261	0.847006		-0.0938774	0.724903		1.70523	0.70669		1.67079	0.701036		0.196586	0.835092		1.86608	0.742917
1.46312	0.761401		0.466391	0.69899		-0.707584	0.729879		1.82093	0.661877		1.69273	0.800723		0.395179	0.844192		1.90553	0.702022		2.20068	0.79731		1.22475	0.852739		1.68766	0.832304		2.2572	0.754785		1.6007	0.799446		0.635226	0.745537		1.93574	0.725885		1.74116	0.694059		0.216473	0.817977		1.28304	0.754082
1.28561	0.784521		0.605113	0.706106		-0.797293	0.745405		1.9135	0.661704		0.374702	0.82948		0.667133	0.85848		2.00333	0.705135		0.493474	0.836791		1.41539	0.850008		3.02898	0.820046		1.58545	0.76769		1.23459	0.805066		0.419473	0.729238		2.23398	0.700626		1.29545	0.687752		0.0534151	0.824502		0.119584	0.812173
1.42417	0.77972		0.552525	0.697714		1.72538	0.83229		1.72568	0.655694		0.477817	0.827603		-0.0921622	0.824251		1.83595	0.702531		1.26282	0.794125		1.09197	0.843577		3.21415	0.828758		1.26267	0.773544		0.616235	0.842876		0.721976	0.74281		2.34149	0.695087		0.496456	0.676541		0.034124	0.822423		0.934474	0.769945
1.80829	0.771028		0.529603	0.695		1.55342	0.840393		1.71871	0.653911		1.67622	0.752353		0.726639	0.835916		1.81164	0.693776		2.46364	0.770065		1.21807	0.843925		2.81842	0.834389		1.58426	0.766785		0.193304	0.856119		1.65529	0.744475		2.35599	0.707428		1.23513	0.696789		-0.142462	0.828483		0.829151	0.784859
2.02903	0.732213		1.58156	0.657437		0.698479	0.848499		1.69569	0.65339		2.01863	0.760191		0.773579	0.8275		1.75825	0.706753		1.86599	0.784147		1.30132	0.840569		2.1371	0.814794		1.46295	0.748782		0.603262	0.855686		0.281735	0.758438		1.29512	0.641419		1.42041	0.699892		-0.115426	0.836231		0.361546	0.79073
3.24275	0.6726		2.65059	0.614293		0.311658	0.83868		1.78931	0.650328		1.61843	0.797982		-0.531945	0.758133		1.64903	0.691246		0.563771	0.823047		1.56214	0.835656		1.61735	0.816499		1.27507	0.773848		0.369351	0.859192		-0.0315068	0.754657		2.21573	0.703317		1.10932	0.678293		-0.10671	0.834474		0.509656	0.772491
2.9388	0.689303		2.32586	0.606863		0.0431902	0.825775		1.68344	0.657504		1.98514	0.762837		1.06567	0.846832		1.74643	0.693493		0.51071	0.832091		1.48109	0.837422		1.28438	0.830482		1.12313	0.782251		-0.0499593	0.847388		0.0681167	0.757054		1.76935	0.685389		0.658043	0.650924		-0.0724929	0.835235		0.996239	0.787797
1.55893	0.745505		1.23557	0.663939		-0.665038	0.735969		1.76812	0.667591		0.93029	0.821477		-0.308181	0.751221		2.22583	0.717389		0.969844	0.806572		1.26687	0.847367		1.35518	0.826199		1.19431	0.764204		-0.870135	0.815566		0.772841	0.757232		1.50393	0.677664		0.0407032	0.642465		-0.0687272	0.836026		0.831761	0.797682
1.11486	0.773097		0.633378	0.687887		-0.41816	0.751515		1.62356	0.658979		1.52832	0.781148		-0.87773	0.761301		2.55095	0.722491		1.58787	0.796702		1.59713	0.844261		1.39379	0.825416		0.934539	0.768074		0.323798	0.843654		0.275952	0.763172		1.28443	0.634248		-1.67699	0.528205		-0.143206	0.831535		0.484466	0.810065
1.06561	0.776458		0.499524	0.687976		1.43038	0.823054		1.60734	0.658031		3.48719	0.697202		-2.24031	0.741189		2.35628	0.720362		0.71096	0.819107		1.61449	0.84739		1.51731	0.824197		1.10673	0.752599		-0.133557	0.836428		-0.0894803	0.737316		1.38921	0.661378		0.0521723	0.610011		-0.221849	0.829106		0.948894	0.776568
1.0133	0.784355		0.552998	0.686323		1.70756	0.83996		1.60118	0.655728		2.03159	0.776504		-1.46429	0.847831		1.95836	0.715014		1.80231	0.767396		1.27122	0.840479		1.61458	0.820212		1.6113	0.745477		-0.323225	0.80388		-0.151724	0.744311		1.14141	0.669158		0.229769	0.680496		-0.257055	0.832414		0.728216	0.805878
1.12411	0.786605		0.923005	0.679684		0.393183	0.829323		1.58616	0.660001		0.457022	0.826079		1.16656	0.85491		1.86486	0.703152		2.176	0.781625		1.48935	0.842184		1.53372	0.817109		2.34263	0.747333		0.244482	0.853241		-0.110145	0.735417		0.876644	0.680528		0.415642	0.687067		-0.221535	0.831214		1.3429	0.768279
2.19826	0.737565		0.574284	0.694652		-0.506619	0.742949		1.64476	0.656133		0.375403	0.828167		0.568933	0.848606		1.98652	0.699614		0.818615	0.817232		1.51138	0.830066		1.89502	0.810937		2.43748	0.74153		-0.104758	0.838147		0.313818	0.753843		0.976026	0.657809		0.0251395	0.679369		-0.171152	0.831546		1.03451	0.794114
1.66822	0.737548		1.35662	0.666057		-0.804459	0.715311		1.67213	0.65337		0.680788	0.82347		0.0917111	0.854593		2.05686	0.699137		0.369543	0.832347		1.47064	0.823407		0.400819	0.82039		2.28209	0.744391		-0.652524	0.816295		1.87699	0.720565		0.801729	0.647409		0.157767	0.666574		0.00850093	0.825274		0.998845	0.765831
1.14183	0.768049		1.24908	0.642053		-0.546342	0.732362		1.52976	0.656694		0.546859	0.823875		-0.416589	0.842827		2.04284	0.694891		0.889179	0.809513		1.64229	0.832982		0.513027	0.820504		2.30226	0.744166		0.453795	0.837379		1.60833	0.73884		0.819326	0.657457		-0.104144	0.692647		-0.0215431	0.833627		0.921438	0.795415
0.651252	0.933222		0.960535	0.820663		1.60968	0.909535		1.70004	0.789733		0.260178	0.962017		-0.029615	0.923397		0.490678	0.934664		0.916648	0.812248		1.55481	0.927563		1.42335	0.932791		0.00405482	0.971699		0.75826	0.9615		-0.342864	0.953351		-0.103847	0.856482		-0.1741	0.957411		1.20892	0.843187		1.46042	0.936914
0.285203	0.951982		0.979704	0.812503		1.02637	0.929699		1.91396	0.824103		1.33647	0.961356		0.487417	0.964484		0.342906	0.938114		0.517493	0.732406		1.43799	0.953121		0.865628	0.956063		-0.127822	0.968831		2.39779	0.875713		-0.344172	0.958265		-0.110611	0.875249		-0.198768	0.973558		2.21348	0.875554		2.0658	0.890199
-0.0344851	0.951851		0.625954	0.872565		0.0811952	0.969537		1.65936	0.858827		0.317868	0.965846		0.303517	0.968616		0.170152	0.971508		0.0495718	0.701646		1.09251	0.960519		1.09056	0.963354		0.0279108	0.978715		0.901447	0.932757		-0.140974	0.967187		0.212048	0.954476		-0.296952	0.974835		2.1352	0.889016		1.92613	0.919242
-0.130689	0.95159		0.633149	0.87487		0.854433	0.941803		1.73068	0.835203		0.156214	0.958536		-0.701691	0.933561		0.177265	0.980284		0.0435696	0.698762		0.618456	0.950304		0.721527	0.964455		-0.121996	0.973757		2.29907	0.868441		-0.25118	0.964415		-0.0529917	0.945496		-0.168257	0.978257		1.84612	0.895514		1.08298	0.962799
0.0213856	0.970653		0.321125	0.892111		0.661248	0.945785		1.20862	0.91485		0.0276939	0.94815		0.254885	0.976988		0.265639	0.965683		-0.055681	0.744001		0.344704	0.951966		0.424736	0.964841		-0.293463	0.980902		1.35628	0.905074		-0.171622	0.948118		-0.355729	0.828009		-0.0686957	0.980234		0.498455	0.965121		-0.199316	0.961509
-0.021869	0.973474		0.421941	0.881187		0.956502	0.940126		0.349402	0.957825		1.05562	0.966154		-0.385159	0.964425		-0.262439	0.97031		-0.209556	0.813711		0.471677	0.962393		0.515402	0.970818		-0.0657943	0.982194		0.488357	0.948945		0.100579	0.952254		-0.317989	0.813512		-0.307575	0.984031		-0.295534	0.958965		1.82884	0.928603
0.178342	0.976269		0.905857	0.8494		0.173776	0.976907		0.0491362	0.967714		0.357873	0.957905		0.265973	0.980873		0.247465	0.948819		0.24283	0.861698		0.245827	0.94915		0.731284	0.968754		-0.467013	0.958003		0.54859	0.975317		0.783726	0.918877		-0.223575	0.889474		-0.338533	0.987295		-0.471876	0.961472		1.76285	0.936258
-0.0537097	0.97434		0.963826	0.848328		0.939059	0.928756		0.00210363	0.970084		-0.376755	0.960177		0.136157	0.983344		0.926587	0.893423		1.82313	0.881149		0.140148	0.96252		0.62709	0.96954		-0.746979	0.931291		0.402326	0.976853		1.34973	0.915928		-0.205447	0.834982		-0.26375	0.988707		-0.0504395	0.966504		1.81469	0.905106
-0.221069	0.972957		0.515166	0.891294		-0.271966	0.97257		-0.040936	0.972127		-0.367499	0.939715		-0.239392	0.952739		0.803915	0.912318		0.176856	0.958734		-0.359349	0.957093		0.652981	0.974003		-0.0880202	0.982388		0.159292	0.979665		1.15465	0.899286		-0.106364	0.937851		0.101523	0.988758		-0.293461	0.972382		1.05261	0.964404
-0.0513161	0.979872		0.241463	0.895714		1.39556	0.916945		-0.0833189	0.971923		1.65533	0.966011		-0.0518884	0.98196		0.366055	0.94909		0.0440708	0.97616		0.211295	0.980299		0.769749	0.977304		-0.196224	0.980488		0.837965	0.967811		-0.365538	0.959209		-0.0532332	0.948746		-0.443561	0.990134		-0.546509	0.960324		0.403572	0.977527
-0.270816	0.973933		0.600559	0.942247		0.344511	0.976075		0.195908	0.969837		0.202465	0.957271		-0.27021	0.971331		0.480832	0.952132		-0.0460411	0.982381		0.0234033	0.985073		0.647133	0.974661		-0.56762	0.936643		0.265846	0.985144		-0.379404	0.969641		-0.44987	0.866085		-0.290237	0.99066		-0.347999	0.969451		-0.504986	0.959168
-0.26351	0.983284		1.2852	0.873203		-0.490107	0.952134		-0.0681421	0.977058		1.09	0.978601		-0.466422	0.946498		0.0689119	0.983335		-0.279937	0.980846		-0.336403	0.978557		0.450804	0.969564		-0.592338	0.963752		0.0159725	0.981945		-0.321081	0.967102		-0.297664	0.847729		-0.532891	0.991806		-0.579177	0.97012		-0.708579	0.9633
0.0765099	0.982857		0.764331	0.933064		0.633619	0.935737		0.00222651	0.977988		0.680903	0.978085		-0.0016616	0.934718		-0.0220988	0.983738		-0.298682	0.981972		-0.208461	0.981305		0.181632	0.973256		0.213263	0.979239		0.271752	0.988693		-0.66098	0.955276		-0.250525	0.878847		-0.348071	0.992243		-0.50069	0.955093		-0.0264	0.970468
-0.129233	0.983264		1.07283	0.920576		1.12394	0.923887		0.51688	0.954043		1.35948	0.976959		-0.21898	0.940449		0.285596	0.972745		-0.102618	0.987476		-0.729705	0.958613		0.103733	0.975578		-0.153341	0.979549		-0.637032	0.960921		-0.167882	0.962924		-0.307453	0.83296		-0.153556	0.993827		2.09065	0.881318		-0.725088	0.963946
-0.108285	0.986228		0.482242	0.983144		0.917285	0.938932		0.135584	0.977967		0.337476	0.973029		-0.330475	0.969204		-0.253717	0.966136		0.0881193	0.98609		0.460207	0.989472		0.385643	0.982565		-0.315884	0.981373		0.243851	0.986762		-0.260871	0.967958		-0.261699	0.822965		-0.218525	0.993451		1.68044	0.890712		0.483576	0.98416
-0.253526	0.987288		0.71306	0.977254		0.647146	0.964833		0.100749	0.985845		-0.382288	0.960915		-0.374414	0.986676		0.0359981	0.981356		-0.0709012	0.990506		-0.0836149	0.990098		-0.0551058	0.982527		-0.483308	0.959384		-0.194438	0.986691		-0.0222359	0.966586		-0.375215	0.832313		-0.190559	0.994773		1.49647	0.90178		0.251126	0.989995
0			0			0			0			0			0			0			0			0			0			0			0			0			0			0			0			0
-0.0674483	0.994316		1.57335	0.876225		-0.763558	0.948648		0.0276017	0.986309		0.0825103	0.971881		-0.132367	0.984429		0.793216	0.901744		0.855161	0.965378		0.0358018	0.992375		0.231228	0.987085		-0.186027	0.976772		1.9431	0.90004		0.0941236	0.974076		-0.184877	0.918988		-0.213006	0.994325		0.0858093	0.964684		0.99909	0.9771
-0.135584	0.988429		0.853422	0.943093		0.0234256	0.957459		1.09923	0.920078		0.0400748	0.970672		-0.691877	0.952016		0.446555	0.947647		0.130487	0.982428		-0.216869	0.987879		0.254144	0.986923		-0.123377	0.955183		0.549213	0.975305		1.46611	0.901834		-0.352317	0.875568		-0.0459653	0.992013		-0.255559	0.98391		1.10139	0.970487
-0.107621	0.989085		1.28055	0.896847		1.35307	0.906462		0.290549	0.968475		-0.46894	0.958312		-0.538117	0.935164		0.0391174	0.986994		0.36297	0.969174		-0.190776	0.988161		0.387642	0.984966		-0.65117	0.8936		0.513544	0.978065		-0.103547	0.94543		0.0441987	0.905168		0.206219	0.991675		0.652099	0.94399		0.893696	0.972638
-0.27059	0.982473		1.52942	0.852096		0.215197	0.975067		0.364187	0.970956		-0.487251	0.958941		-0.485232	0.932382		0.245204	0.977206		0.550476	0.946797		-0.321438	0.985484		0.889392	0.982668		0.0862873	0.965945		0.187782	0.977764		-0.518576	0.969771			0.851834		-0.0236107	0.991045		-0.552941	0.967423		1.07345	0.951273
-0.261966	0.981554		1.00911	0.904594		0.231709	0.958497		0.0295611	0.982061		-0.189424	0.959033		-0.916892	0.903202		-0.0846452	0.984484		1.15705	0.928261		0.34594	0.971472		0.594873	0.972005		-0.0996027	0.957033		-0.134777	0.974304		-0.602572	0.977342		-0.452863	0.891547		-0.17538	0.9884		-0.622037	0.963733		1.19919	0.9472
-0.481785	0.97802		0.578248	0.968899		0.785241	0.922855		0.105596	0.980622		-0.476602	0.953209		0.0480443	0.939625		-0.0387539	0.982868		0.288396	0.952637		-0.0415787	0.977076		0.176247	0.958925		0.0431598	0.961923		-0.801671	0.938621		-0.267423	0.955722		0.0383038	0.854096		0.0593494	0.984833		-0.761705	0.956223		1.22997	0.949929
-0.451087	0.967399		0.569372	0.959287		0.370343	0.973269		0.277054	0.970337		0.602983	0.979674		0.286845	0.939163		0.483285	0.914083		-0.279427	0.973867		0.0550932	0.985251		-0.409809	0.96463		-0.576996	0.902503		0.849281	0.949872		0.728074	0.909239			0.806852		-0.18052	0.984542		0.507595	0.923749		1.09909	0.945735
-0.20382	0.970792		0.169947	0.936246		-0.759456	0.932769		0.0509414	0.979297		0.530111	0.958085		-0.148947	0.947337		0.0305538	0.979005		-0.247439	0.979185		-0.494364	0.985195		-0.516723	0.952502		-0.0517394	0.947705		2.27894	0.861837		0.226721	0.948796		-0.3554	0.885902		0.0206668	0.985512		0.0310124	0.974139		0.906963	0.963032
-0.160139	0.962089		0.757699	0.831015		-0.819593	0.928213		-0.085587	0.976078		0.556356	0.971022		-0.345083	0.945838		-0.578452	0.955328		0.0918153	0.972197		-0.528543	0.985393		-0.284326	0.952197		-0.30828	0.9406		0.580487	0.945353		-0.574014	0.96877		0.168458	0.949838		0.244921	0.985708		-0.754429	0.946285		1.31886	0.943376
-0.362805	0.946326		2.00718	0.756222		-0.829751	0.923808		-0.0432202	0.976034		1.6572	0.967261		-0.399534	0.925203		0.633298	0.888512		-0.346409	0.964796		-0.599924	0.982855		-0.575389	0.939191		-0.244785	0.949591		0.475023	0.965701		-0.547081	0.971566		-0.793217	0.797816		-0.154593	0.982338		-0.798643	0.954483		0.930937	0.945774
2.80046	0.834372		3.56814	0.716268		-0.743738	0.922534		0.0771357	0.965173		0.0790881	0.970303		-0.153966	0.965735		0.145253	0.978045		1.50939	0.915911		-0.111079	0.979675		-0.11027	0.942753		-0.0542564	0.950481		0.474273	0.976015		-0.377834	0.967221		0.625824	0.888668		-0.13093	0.982185		0.398789	0.933645		0.667552	0.937072
2.61808	0.809552		3.26474	0.733766		-0.702669	0.928086		-9.12799e-05	0.967053		1.19144	0.968802		0.347234	0.944944		-0.250864	0.957607		0.037199	0.911983		-0.113037	0.979341		0.187994	0.948511		-0.737111	0.910075		0.235071	0.976998		-0.709838	0.944473		0.00788302	0.92809		0.0572263	0.978785		-0.657213	0.957724		0.463615	0.952141
1.65154	0.841893		2.55261	0.736802		-0.758899	0.914801		0.506625	0.930444		0.0339155	0.958388		-0.164731	0.90835		0.926087	0.872367		0.122565	0.894835		-0.40593	0.978069		0.325014	0.945614		0.347941	0.941535		0.415204	0.981536		-0.150014	0.947189		0.42166	0.78965		0.119435	0.980322		-0.57881	0.942296		0.875241	0.933175
2.20538	0.751863		2.6469	0.620438		1.8943	0.782838		2.18443	0.683034		-0.178102	0.859566		1.55451	0.840645		2.77446	0.704793		0.7572	0.832317		0.883823	0.817109		1.63525	0.831828		2.25813	0.731759		0.451636	0.852468		3.11355	0.693937		2.43156	0.75544		0.970569	0.747282		0.418789	0.779062		1.70951	0.790099
1.89231	0.753174		3.68457	0.61815		2.12882	0.783726		2.7564	0.66533		-0.0724316	0.874735		1.37753	0.846441		2.50814	0.700851		2.82406	0.773673		-0.500661	0.835281		1.82454	0.85593		2.17338	0.735615		0.0613245	0.86281		1.32443	0.707189		2.50584	0.736014		0.98273	0.745675		2.00766	0.731479		1.89717	0.775324
1.0236	0.779634		3.42859	0.611526		1.53025	0.808671		2.37381	0.671885		1.19652	0.860953		0.922142	0.850692		2.2388	0.699955		0.868754	0.843805		-1.43335	0.806341		1.91284	0.855897		2.10239	0.74227		-0.351189	0.844719		0.998817	0.731284		2.28265	0.770505		1.2564	0.737872		1.6766	0.751956		1.91732	0.772608
1.03345	0.788567		2.48105	0.628508		0.506164	0.798996		1.59718	0.748017		0.600144	0.871984		0.794479	0.840022		2.05095	0.696036		0.52576	0.846598		-0.78535	0.829132		2.09385	0.848001		2.07711	0.757309		0.119914	0.869954		0.416798	0.749672		2.21275	0.776058		1.67309	0.734571		1.66601	0.750185		1.8916	0.750873
1.37284	0.783374		1.31642	0.653427		-0.0571246	0.778728		1.74582	0.733509		0.970804	0.862707		1.00189	0.850869		2.12547	0.691184		1.16991	0.838531		1.0731	0.849694		2.21142	0.847341		2.10659	0.766337		-0.152866	0.862946		0.505727	0.759049		1.48932	0.802212		1.56116	0.721987		1.53597	0.744144		1.96149	0.773872
1.05752	0.785325		1.29265	0.642929		-0.146045	0.768575		1.73066	0.729919		-0.433272	0.854271		0.227479	0.812625		2.13403	0.692095		1.86996	0.822929		2.4373	0.848074		1.89793	0.847193		1.59619	0.786082		-0.47776	0.849039		0.175734	0.787707		2.60042	0.780645		0.866093	0.741955		1.23735	0.757534		1.9332	0.781879
1.00504	0.79384		1.60661	0.636484		-0.258088	0.764811		2.66371	0.641724		0.0539573	0.881989		1.09573	0.828712		2.07133	0.690873		1.77809	0.829417		2.15319	0.856238		2.01546	0.850625		2.08508	0.767996		0.279502	0.876555		0.378955	0.770372		2.52937	0.764178		0.457464	0.741422		1.30852	0.756155		1.93154	0.766935
0.937287	0.787792		1.33025	0.647598		-0.127888	0.771871		2.4071	0.647281		0.635695	0.862888		0.442078	0.780628		2.09144	0.69532		2.40319	0.806384		1.4646	0.863187		2.23693	0.849481		1.25242	0.792538		-0.1246	0.846359		1.13048	0.749765		1.3874	0.778696		0.766169	0.746567		1.28208	0.753532		1.19662	0.820522
1.77799	0.767967		1.40329	0.653359		0.199262	0.807856		2.13943	0.651415		1.13291	0.857916		0.135163	0.830056		2.08535	0.688245		0.805958	0.82019		1.16139	0.853531		2.2892	0.844972		2.03215	0.746677		-1.04898	0.810517		1.13664	0.734838		1.65762	0.805656		1.30808	0.735449		0.909324	0.793838		1.34153	0.817247
1.66744	0.757721		1.26038	0.664029		2.14083	0.776425		2.07233	0.644928		-0.0501597	0.852702		-0.69635	0.802524		2.12165	0.688674		0.738888	0.835204		0.730424	0.86347		2.00352	0.847038		1.15169	0.790789		0.214294	0.873073		0.12055	0.762671		0.911282	0.785177		1.2321	0.702494		1.32724	0.745551		1.81977	0.77265
1.07667	0.790277		1.27033	0.65328		1.30713	0.811632		2.06907	0.651682		0.185665	0.871415		-1.02243	0.802818		2.09815	0.696484		1.47836	0.813812		0.480653	0.863302		2.04588	0.850274		1.49971	0.785328		-0.00199821	0.865623		0.339256	0.760747		0.710098	0.788164		0.918058	0.701239		1.43359	0.748618		2.122	0.765314
0.891474	0.796534		2.21167	0.627622		-0.175141	0.767148		2.0744	0.651553		1.86857	0.848347		0.103008	0.832209		1.85083	0.690453		2.12754	0.817323		1.12436	0.860905		1.8201	0.836478		1.5373	0.779626		-0.117656	0.860844		0.020376	0.753908		0.629082	0.799095		1.20186	0.706788		1.52671	0.747667		2.86209	0.775817
1.0573	0.792965		2.7807	0.60595		0.178154	0.799236		2.05185	0.646315		0.0741726	0.855691		0.147483	0.825424		1.89101	0.683339		0.550228	0.843675		1.0448	0.858153		1.86237	0.840373		1.38863	0.79627		-0.901413	0.795733		0.382617	0.751606		1.40647	0.796124		1.50065	0.70974		1.54629	0.73727		2.76392	0.73311
1.06473	0.786534		1.42127	0.629966		0.122944	0.788006		1.97384	0.649365		-0.0277606	0.863322		-0.603816	0.791691		1.90611	0.679187		0.425038	0.835867		1.22719	0.863709		1.54692	0.843796		1.31878	0.791173		-0.832727	0.814652		0.258642	0.742205		1.91714	0.793996		1.40408	0.709135		1.50939	0.744928		2.26155	0.746328
1.15977	0.790117		1.12019	0.655392		-0.0186781	0.76987		1.99559	0.654423		1.05424	0.852093		0.0327276	0.831953		1.95527	0.683758		1.78319	0.791601		1.36184	0.862002		1.58534	0.832554		1.86675	0.768112		0.255823	0.855938		-0.116113	0.737229		1.33002	0.819406		1.48023	0.703962		1.69306	0.742954		2.11721	0.754419
1.20959	0.779336		1.17945	0.652495		-0.0604382	0.771184		1.92168	0.652488		1.31044	0.850742		0.0207655	0.835691		1.94152	0.687639		2.12977	0.802035		1.14113	0.860254		1.63256	0.83332		1.77389	0.785842		1.40626	0.801667		0.61299	0.714252		1.56053	0.807153		1.5506	0.69753		1.71294	0.726191		1.53417	0.75855
1.03208	0.797278		1.31817	0.658629		-0.150147	0.774266		2.01425	0.650925		-0.00758591	0.836251		0.292719	0.846272		2.03933	0.689166		0.422573	0.840289		1.33177	0.857916		2.97388	0.816195		1.10214	0.798123		1.04015	0.812073		0.397237	0.738774		1.85877	0.756377		1.1049	0.692349		1.54989	0.734511		0.37071	0.806345
1.17064	0.793323		1.26559	0.652505		2.37253	0.773203		1.82643	0.644257		0.0955289	0.847794		-0.466576	0.814082		1.87195	0.68704		1.19192	0.802807		1.00835	0.852429		3.15904	0.828103		0.779359	0.80769		0.421797	0.850886		0.69974	0.717896		1.96628	0.776606		0.305897	0.680922		1.5306	0.738163		1.1856	0.778986
1.55476	0.78489		1.24266	0.64584		2.20057	0.783284		1.81945	0.641847		1.29393	0.840451		0.352225	0.831095		1.84764	0.67968		2.39274	0.778545		1.13445	0.84888		2.76331	0.829809		1.10096	0.807644		-0.0011339	0.852885		1.63306	0.693012		1.98077	0.784092		1.04458	0.697337		1.35401	0.740446		1.08028	0.78729
1.7755	0.750341		2.29462	0.611667		1.34563	0.816588		1.79644	0.643525		1.63634	0.83553		0.399165	0.825232		1.79425	0.690995		1.79509	0.793173		1.21771	0.845733		2.08199	0.811411		0.979646	0.792641		0.408824	0.861376		0.259499	0.724876		0.919901	0.77446		1.22985	0.70285		1.38105	0.750577		0.612672	0.791319
2.98922	0.685005		3.36365	0.57753		0.958804	0.828019		1.89006	0.641453		1.23614	0.840943		-0.906359	0.74123		1.68503	0.676356		0.492869	0.827373		1.47853	0.841987		1.56225	0.815101		0.791766	0.807568		0.174913	0.855539		-0.0537427	0.743852		1.84052	0.798657		0.918764	0.683471		1.38976	0.751449		0.760782	0.775916
2.68528	0.703968		3.03892	0.564721		0.690336	0.822984		1.78419	0.645022		1.60286	0.836043		0.691255	0.836774		1.78242	0.679805		0.439809	0.83766		1.39747	0.841236		1.22927	0.828883		0.639822	0.816445		-0.244397	0.840009		0.0458808	0.747775		1.39414	0.798794		0.467484	0.656593		1.42398	0.751712		1.24736	0.791494
1.3054	0.762124		1.94863	0.611385		-0.0178915	0.777476		1.86887	0.65359		0.548002	0.834062		-0.682595	0.736829		2.26183	0.699439		0.898943	0.813243		1.18325	0.849304		1.30007	0.825149		0.711005	0.803415		-1.06457	0.796593		0.750605	0.717634		1.12871	0.802607		-0.149856	0.64791		1.42774	0.749229		1.08289	0.803209
0.861335	0.788053		1.34644	0.642332		0.228986	0.782118		1.72431	0.644992		1.14604	0.847275		-1.25214	0.743887		2.58695	0.707416		1.51696	0.803062		1.51352	0.847302		1.33868	0.826935		0.451231	0.802136		0.12936	0.845646		0.253716	0.742332		0.909211	0.78146		-1.86755	0.535331		1.35327	0.746169		0.735592	0.812893
0.812084	0.789471		1.21258	0.640264		2.07753	0.764799		1.70809	0.645184		3.10491	0.80106		-2.61473	0.722385		2.39228	0.700946		0.640059	0.822915		1.53088	0.852738		1.46221	0.826488		0.623421	0.796024		-0.327995	0.833338		-0.111716	0.745908		1.01399	0.794085		-0.138386	0.618156		1.27462	0.744206		1.20002	0.78559
0.759774	0.794688		1.26606	0.642654		2.35471	0.786156		1.70193	0.644162		1.64931	0.825016		-1.8387	0.812251		1.99436	0.696622		1.73141	0.776299		1.1876	0.848419		1.55948	0.821441		1.12799	0.791147		-0.517664	0.785		-0.17396	0.741485		0.766194	0.793276		0.0392098	0.68526		1.23942	0.748801		0.979342	0.809466
0.870588	0.796371		1.63607	0.630888		1.04033	0.812649		1.68691	0.647649		0.0747336	0.816031		0.79215	0.834758		1.90086	0.684352		2.1051	0.789065		1.40574	0.848665		1.47861	0.822082		1.85933	0.778838		0.0500436	0.853017		-0.13238	0.738718		0.501429	0.804457		0.225083	0.690879		1.27494	0.749649		1.59403	0.77397
1.94473	0.753878		1.28734	0.655743		0.140527	0.783975		1.74551	0.644733		-0.00688463	0.822037		0.194519	0.81424		2.02252	0.682105		0.747714	0.823069		1.42776	0.839811		1.83992	0.814796		1.95417	0.769273		-0.299197	0.834233		0.291582	0.729528		0.60081	0.793871		-0.165419	0.684437		1.32532	0.74751		1.28564	0.796412
1.4147	0.755192		2.06968	0.625017		-0.157313	0.764157		1.77288	0.641266		0.298499	0.827367		-0.282703	0.817851		2.09286	0.68273		0.298642	0.83734		1.38703	0.833952		0.345713	0.81868		1.79878	0.776767		-0.846962	0.803286		1.85475	0.667887		0.426514	0.7867		-0.0327914	0.672697		1.50497	0.758256		1.24997	0.776828
0.888306	0.779786		1.96214	0.586027		0.100804	0.766646		1.63051	0.645576		0.164571	0.823894		-0.791003	0.806842		2.07884	0.6796		0.818278	0.817146		1.55867	0.841676		0.457921	0.821246		1.81895	0.76935		0.259357	0.849101		1.58609	0.695432		0.44411	0.792435		-0.294703	0.69723		1.47493	0.763812		1.17256	0.802694
0.7187	0.931262		-0.612811	0.87015		2.37324	0.803761		1.67244	0.831625		0.177668	0.959201		0.102752	0.889424		-0.302538	0.959239		0.0614863	0.823286		1.51901	0.919365		1.19212	0.920932		0.190082	0.966931		-1.18485	0.914097		-0.436987	0.953599		0.0810302	0.950981		0.0389059	0.953732		1.12311	0.89906		0.46133	0.961835
0.352651	0.953429		-0.593641	0.883131		1.78992	0.823484		1.88636	0.858356		1.25396	0.942867		0.619784	0.949591		-0.45031	0.961171		-0.337668	0.724741		1.40219	0.947542		0.6344	0.94726		0.0582047	0.979273		0.454688	0.971695		-0.438295	0.953344		0.0742658	0.960429		0.0142381	0.969403		2.12767	0.929124		1.06671	0.937203
0.0329632	0.95407		-0.947391	0.841713		0.844753	0.936408		1.63176	0.884465		0.235358	0.972881		0.435885	0.965779		-0.623064	0.92083		-0.80559	0.68162		1.05671	0.956228		0.859328	0.954318		0.213938	0.966234		-1.04166	0.943097		-0.235098	0.960816		0.396925	0.929608		-0.0839455	0.970693		2.0494	0.935936		0.927044	0.952884
-0.0632404	0.95422		-0.940197	0.844257		1.61799	0.843853		1.70307	0.867487		0.0737034	0.969933		-0.569324	0.956065		-0.615951	0.916188		-0.811592	0.680705		0.582654	0.948559		0.490299	0.955243		0.0640317	0.981239		0.355962	0.959264		-0.345303	0.950905		0.131886	0.933835		0.0447491	0.973701		1.76031	0.937541		0.0838855	0.957086
0.0888339	0.972445		-1.25222	0.803308		1.42481	0.851221		1.18102	0.927686		-0.0548164	0.967981		0.387253	0.970081		-0.527577	0.94284		-0.910842	0.72114		0.308903	0.95041		0.193508	0.957291		-0.107436	0.979238		-0.586821	0.94793		-0.265746	0.955995		-0.170851	0.960995		0.14431	0.978217		0.412646	0.943925		-1.19841	0.938214
0.0455793	0.976552		-1.1514	0.837619		1.72006	0.838975		0.321801	0.953697		0.973109	0.940102		-0.252791	0.975486		-1.05565	0.824557		-1.06472	0.78788		0.435875	0.95912		0.284174	0.964919		0.120233	0.975571		-1.45475	0.936714		0.0064551	0.962071		-0.133111	0.95811		-0.0945687	0.980677		-0.381343	0.945879		0.829754	0.966068
0.24579	0.978067		-0.667488	0.878854		0.937334	0.918935		0.0215345	0.958062		0.275363	0.972959		0.398341	0.973092		-0.545751	0.946464		-0.612331	0.858759		0.210025	0.946587		0.500056	0.963532		-0.280986	0.986899		-1.39451	0.922303		0.689602	0.950313		-0.038698	0.9696		-0.125526	0.983578		-0.557685	0.94958		0.76376	0.967905
0.0137386	0.978675		-0.609519	0.880504		1.70262	0.818069		-0.0254981	0.965619		-0.459266	0.966123		0.268524	0.98068		0.133371	0.983412		0.967965	0.910978		0.104346	0.958795		0.395862	0.967097		-0.560952	0.974961		-1.54078	0.914592		1.25561	0.941325		-0.0205694	0.966391		-0.0507443	0.985086		-0.136249	0.962855		0.815602	0.948915
-0.153621	0.977343		-1.05818	0.836715		0.491592	0.964639		-0.0685377	0.967936		-0.450009	0.963496		-0.107025	0.970299		0.0106991	0.980854		-0.678305	0.935232		-0.395151	0.9545		0.421753	0.968641		0.098007	0.952885		-1.78381	0.887274		1.06052	0.933394		0.0785128	0.964268		0.314529	0.983646		-0.37927	0.968397		0.0535225	0.969942
0.0161322	0.981424		-1.33188	0.779561		2.15912	0.803629		-0.110921	0.967618		1.57282	0.934675		0.0804791	0.973847		-0.427161	0.961886		-0.811091	0.952451		0.175493	0.977416		0.538521	0.972408		-0.0101963	0.987707		-1.10514	0.939644		-0.459662	0.95027		0.131644	0.967289		-0.230554	0.988235		-0.632318	0.955896		-0.595517	0.962423
-0.203368	0.976125		-0.972787	0.930685		1.10807	0.908937		0.168306	0.976047		0.119955	0.977646		-0.137843	0.959643		-0.312384	0.96159		-0.901203	0.955032		-0.0123984	0.981148		0.415905	0.963462		-0.381593	0.979976		-1.67726	0.89766		-0.473528	0.961215		-0.264992	0.976219		-0.0772308	0.988453		-0.433809	0.965461		-1.50408	0.936676
-0.196062	0.985733		-0.288145	0.978283		0.273451	0.974401		-0.0957438	0.971057		1.00749	0.955754		-0.334055	0.915733		-0.724304	0.909249		-1.1351	0.93922		-0.372204	0.972748		0.219576	0.956205		-0.406311	0.9847		-1.92713	0.868799		-0.415204	0.94776		-0.112786	0.972627		-0.319884	0.991002		-0.664986	0.957665		-1.70767	0.936954
0.143958	0.984099		-0.809014	0.962698		1.39718	0.854747		-0.0253752	0.980199		0.598393	0.973884		0.130706	0.89834		-0.815315	0.878418		-1.15384	0.946863		-0.244263	0.979803		-0.0495962	0.96062		0.39929	0.941215		-1.67135	0.905396		-0.755104	0.922888		-0.0656476	0.971865		-0.135065	0.991554		-0.586499	0.9682		-1.02549	0.942272
-0.0617844	0.986038		-0.500513	0.981135		1.8875	0.809545		0.489279	0.970613		1.27697	0.963313		-0.0866127	0.905775		-0.50762	0.955775		-0.95778	0.960269		-0.765507	0.95332		-0.127494	0.962773		0.0326862	0.991154		-2.58014	0.843976		-0.262005	0.974638		-0.122576	0.963239		0.0594504	0.992579		2.00485	0.934284		-1.72418	0.930511
-0.0408369	0.987732		-1.0911	0.913406		1.68084	0.830364		0.107982	0.979539		0.254966	0.983327		-0.198108	0.942187		-1.04693	0.806421		-0.767042	0.964661		0.424406	0.985449		0.154415	0.965712		-0.129857	0.991248		-1.69925	0.902279		-0.354995	0.972163		-0.0768217	0.96329		-0.00551911	0.991445		1.59463	0.949062		-0.515513	0.963471
-0.186078	0.986887		-0.860285	0.933857		1.4107	0.879199		0.0731477	0.980684		-0.464798	0.975753		-0.242046	0.976447		-0.757218	0.922543		-0.926063	0.960942		-0.119417	0.989442		-0.286334	0.970974		-0.297281	0.98993		-2.13754	0.896329		-0.116359	0.981983		-0.190338	0.942764		0.0224474	0.993175		1.41066	0.955159		-0.747964	0.965329
0.0674483	0.994316		-1.57335	0.876225		0.763558	0.948648		-0.0276017	0.986309		-0.0825103	0.971881		0.132367	0.984429		-0.793216	0.901744		-0.855161	0.965378		-0.0358018	0.992375		-0.231228	0.987085		0.186027	0.976772		-1.9431	0.90004		-0.0941236	0.974076		0.184877	0.918988		0.213006	0.994325		-0.0858093	0.964684		-0.99909	0.9771
0			0			0			0			0			0			0			0			0			0			0			0			0			0			0			0			0
-0.0681353	0.991126		-0.719923	0.966434		0.786984	0.93003		1.07163	0.94863		-0.0424355	0.986688		-0.559509	0.976645		-0.346661	0.975968		-0.724674	0.970389		-0.252671	0.991659		0.0229162	0.991964		0.0626507	0.979915		-1.39389	0.949678		1.37198	0.942498		-0.16744	0.979221		0.167041	0.994542		-0.341368	0.964795		0.1023	0.989065
-0.0401726	0.991466		-0.2928	0.975198		2.11663	0.788703		0.262948	0.972532		-0.551451	0.975291		-0.40575	0.961105		-0.754099	0.90543		-0.492192	0.968369		-0.226578	0.989339		0.156414	0.990488		-0.465142	0.957132		-1.42956	0.935147		-0.197671	0.971869		0.229076	0.982194		0.419225	0.993531		0.56629	0.976523		-0.105394	0.986783
-0.203141	0.985592		-0.0439208	0.969879		0.978755	0.919532		0.336586	0.981352		-0.569761	0.974385		-0.352865	0.951685		-0.548012	0.949013		-0.304686	0.96022		-0.35724	0.988874		0.658164	0.984167		0.272314	0.95623		-1.75532	0.903065		-0.612699	0.968951			0.9734		0.189395	0.991469		-0.63875	0.953623		0.0743561	0.978538
-0.194518	0.983139		-0.564238	0.949965		0.995267	0.89016		0.00195934	0.97803		-0.271934	0.976613		-0.784524	0.930928		-0.877861	0.886826		0.301884	0.946205		0.310138	0.971119		0.363645	0.977914		0.0864245	0.974063		-2.07788	0.869901		-0.696696	0.969326		-0.267986	0.97732		0.0376257	0.991244		-0.707846	0.964766		0.200103	0.976219
-0.414337	0.979995		-0.995097	0.921911		1.5488	0.813041		0.0779942	0.981906		-0.559113	0.970711		0.180412	0.948028		-0.83197	0.849163		-0.566765	0.944946		-0.0773805	0.977932		-0.0549806	0.961171		0.229187	0.956974		-2.74478	0.815282		-0.361546	0.974498		0.223181	0.970974		0.272356	0.987366		-0.847515	0.953485		0.230879	0.975359
-0.383639	0.969404		-1.00397	0.93976		1.1339	0.897552		0.249452	0.980149		0.520473	0.965679		0.419213	0.946652		-0.309931	0.987134		-1.13459	0.942759		0.0192914	0.984606		-0.641036	0.967082		-0.390969	0.962218		-1.09382	0.949717		0.633951	0.951485			0.953442		0.0324863	0.985944		0.421786	0.971416		0.100002	0.971011
-0.136372	0.971518		-1.4034	0.830248		0.00410232	0.97249		0.0233397	0.983295		0.447601	0.956791		-0.0165792	0.959655		-0.762662	0.888218		-1.1026	0.954532		-0.530165	0.987108		-0.747951	0.958227		0.134288	0.963698		0.33584	0.978866		0.132597	0.962099		-0.170522	0.965915		0.233673	0.986131		-0.0547969	0.971663		-0.0921268	0.970425
-0.0926908	0.962783		-0.815647	0.881542		-0.0560354	0.980588		-0.113189	0.978982		0.473846	0.951638		-0.212716	0.961733		-1.37167	0.810809		-0.763346	0.964849		-0.564345	0.985062		-0.515554	0.956765		-0.122253	0.967699		-1.36262	0.955256		-0.668137	0.948496		0.353335	0.954246		0.457927	0.985036		-0.840239	0.939252		0.319766	0.97041
-0.295357	0.948675		0.433831	0.892025		-0.0661927	0.975147		-0.0708219	0.979335		1.57469	0.944049		-0.267167	0.937673		-0.159918	0.984721		-1.20157	0.933655		-0.635725	0.982245		-0.806617	0.94499		-0.0587577	0.975227		-1.46808	0.946138		-0.641204	0.959936		-0.60834	0.950058		0.0584133	0.9861		-0.884453	0.960006		-0.0681529	0.967897
2.8679	0.831777		1.99479	0.812077		0.0198195	0.97218		0.049534	0.97327		-0.00342215	0.975258		-0.0215983	0.947747		-0.647963	0.910115		0.654225	0.954912		-0.146881	0.981688		-0.341498	0.945735		0.131771	0.968704		-1.46883	0.922948		-0.471957	0.966405		0.810702	0.965813		0.0820764	0.984318		0.31298	0.959533		-0.331538	0.961271
2.68553	0.809296		1.6914	0.80666		0.0608888	0.969284		-0.027693	0.969074		1.10893	0.94682		0.479601	0.908994		-1.04408	0.810253		-0.817962	0.900274		-0.148839	0.98384		-0.0432342	0.950445		-0.551084	0.959751		-1.70803	0.892676		-0.803962	0.916757		0.19276	0.981552		0.270232	0.981466		-0.743022	0.949587		-0.535475	0.966395
1.71898	0.84053		0.979267	0.845558		0.00465859	0.965499		0.479023	0.954675		-0.0485948	0.963628		-0.032363	0.874302		0.132871	0.972405		-0.732597	0.890487		-0.441731	0.982215		0.0937863	0.953792		0.533968	0.920107		-1.5279	0.903563		-0.244137	0.962403		0.606537	0.940059		0.332441	0.983475		-0.664619	0.939813		-0.123849	0.962603
2.27283	0.748394		1.07355	0.714185		2.65786	0.704742		2.15683	0.728082		-0.260612	0.859033		1.68688	0.811006		1.98125	0.685407		-0.0979616	0.855418		0.848021	0.813961		1.40402	0.824413		2.44416	0.729006		-1.49147	0.839615		3.01943	0.725851		2.61644	0.740033		1.18358	0.74866		0.332979	0.824051		0.710423	0.824611
1.95976	0.751655		2.11123	0.687438		2.89238	0.686099		2.7288	0.712123		-0.154942	0.849565		1.50989	0.813924		1.71493	0.680222		1.9689	0.83763		-0.536463	0.832468		1.59331	0.848509		2.35941	0.735606		-1.88178	0.807257		1.23031	0.737681		2.69071	0.734192		1.19574	0.74615		1.92185	0.79482		0.898079	0.820364
1.09105	0.778032		1.85525	0.690085		2.29381	0.717387		2.34621	0.71283		1.11401	0.837794		1.05451	0.822161		1.44558	0.677616		0.0135925	0.849467		-1.46915	0.80032		1.68161	0.848103		2.28842	0.739184		-2.29429	0.743548		0.904694	0.761958		2.46753	0.765154		1.46941	0.734312		1.59079	0.810914		0.918235	0.816409
1.1009	0.786765		0.907707	0.736305		1.26972	0.768336		1.56958	0.775906		0.517633	0.84957		0.926847	0.81295		1.25773	0.67124		-0.329401	0.844593		-0.821152	0.824897		1.86263	0.84323		2.26314	0.752225		-1.82319	0.806273		0.322674	0.762738		2.39763	0.757174		1.8861	0.730153		1.5802	0.811138		0.892513	0.796901
1.44029	0.781275		-0.256928	0.73772		0.706433	0.795033		1.71822	0.768235		0.888294	0.857434		1.13425	0.83674		1.33225	0.669021		0.314747	0.867681		1.03729	0.846338		1.98019	0.840116		2.29262	0.7586		-2.09597	0.782218		0.411603	0.762867		1.6742	0.776197		1.77417	0.716955		1.45016	0.806658		0.962401	0.815129
1.12496	0.783425		-0.280694	0.742703		0.617513	0.794128		1.70306	0.764681		-0.515782	0.867762		0.359846	0.815168		1.34082	0.670203		1.0148	0.858433		2.4015	0.84703		1.6667	0.840309		1.78221	0.773991		-2.42086	0.745954		0.0816107	0.790833		2.78529	0.773012		1.0791	0.741453		1.15154	0.817207		0.934106	0.818781
1.07249	0.792449		0.0332617	0.74034		0.50547	0.799349		2.63611	0.689319		-0.028553	0.854469		1.22809	0.790611		1.27812	0.666596		0.922926	0.859643		2.11739	0.859202		1.78424	0.848569		2.27111	0.757736		-1.6636	0.827479		0.284831	0.781447		2.71424	0.75994		0.67047	0.742826		1.22271	0.814745		0.932451	0.811182
1.00474	0.786138		-0.243093	0.729931		0.63567	0.801293		2.37949	0.69188		0.553185	0.8592		0.574446	0.781801		1.29822	0.669419		1.54803	0.853565		1.4288	0.866002		2.00571	0.846007		1.43845	0.780611		-2.0677	0.742942		1.03635	0.773495		1.57228	0.733798		0.979175	0.747976		1.19627	0.813131		0.197527	0.824758
1.84543	0.7664		-0.170051	0.728463		0.96282	0.798176		2.11182	0.69812		1.0504	0.824428		0.267531	0.818099		1.29213	0.662529		-0.0492034	0.830431		1.12559	0.858083		2.05798	0.839774		2.21818	0.738875		-2.99209	0.693591		1.04252	0.766642		1.84249	0.76587		1.52109	0.734078		0.823515	0.829412		0.342444	0.831124
1.73489	0.757304		-0.312961	0.722234		2.90439	0.67018		2.04472	0.691227		-0.13267	0.865491		-0.563983	0.801479		1.32844	0.667788		-0.116274	0.843837		0.694622	0.866944		1.77229	0.839535		1.33771	0.774953		-1.72881	0.78275		0.0264265	0.754547		1.09616	0.750565		1.44511	0.698867		1.24143	0.807079		0.82068	0.799325
1.14412	0.790812		-0.303017	0.729195		2.07068	0.723555		2.04147	0.697046		0.103155	0.844657		-0.890066	0.786093		1.30493	0.679205		0.623194	0.8554		0.444851	0.866765		1.81466	0.843249		1.68573	0.771107		-1.9451	0.770238		0.245132	0.765155		0.894976	0.760088		1.13106	0.696886		1.34778	0.805522		1.12291	0.795081
0.958922	0.796953		0.638325	0.713537		0.588417	0.787324		2.0468	0.696176		1.78606	0.817478		0.235375	0.810194		1.05762	0.670679		1.27238	0.862254		1.08856	0.867242		1.58887	0.830773		1.72333	0.766975		-2.06076	0.77403		-0.0737476	0.754721		0.813959	0.76287		1.41486	0.708945		1.4409	0.806614		1.863	0.794912
1.12474	0.793426		1.20736	0.715368		0.941712	0.802084		2.02425	0.691226		-0.00833771	0.860369		0.27985	0.806017		1.09779	0.664428		-0.304934	0.845509		1.009	0.864587		1.63114	0.834404		1.57465	0.780212		-2.84452	0.680027		0.288494	0.756421		1.59135	0.770195		1.71366	0.710811		1.46048	0.799256		1.76483	0.764449
1.13218	0.785499		-0.152077	0.717328		0.886502	0.79614		1.94624	0.693889		-0.110271	0.867373		-0.471449	0.802641		1.11289	0.661157		-0.430124	0.855099		1.19139	0.867476		1.31569	0.838674		1.50481	0.779335		-2.77583	0.701952		0.164519	0.741039		2.10202	0.764582		1.61708	0.711465		1.42358	0.803067		1.26246	0.772969
1.22722	0.788907		-0.453152	0.715727		0.74488	0.788471		1.96799	0.699711		0.971728	0.810232		0.165095	0.829841		1.16206	0.66671		0.928032	0.845289		1.32604	0.865511		1.35411	0.8274		2.05278	0.76526		-1.68728	0.797986		-0.210237	0.720445		1.51489	0.776053		1.69323	0.705004		1.60725	0.80151		1.11812	0.778514
1.27704	0.777274		-0.393894	0.718094		0.70312	0.79524		1.89408	0.69642		1.22793	0.844055		0.153133	0.838129		1.14831	0.668835		1.27461	0.850857		1.10533	0.863404		1.40133	0.828666		1.95992	0.77996		-0.536846	0.86103		0.518866	0.746277		1.7454	0.770011		1.76361	0.69606		1.62714	0.783649		0.53508	0.781788
1.09953	0.797105		-0.255172	0.724198		0.613411	0.789634		1.98664	0.695722		-0.0900962	0.854031		0.425086	0.840608		1.24611	0.674612		-0.432588	0.83431		1.29597	0.860341		2.74265	0.808383		1.28817	0.790757		-0.902955	0.868903		0.303113	0.732236		2.04364	0.739131		1.3179	0.690726		1.46408	0.790219		-0.62838	0.790325
1.23809	0.792358		-0.30776	0.709666		3.13608	0.668076		1.79883	0.690037		0.0130186	0.851536		-0.334209	0.827313		1.07874	0.671472		0.33676	0.844633		0.972548	0.855939		2.92781	0.81738		0.965386	0.798289		-1.52131	0.840328		0.605616	0.739065		2.15116	0.747268		0.518904	0.678759		1.44479	0.790594		0.18651	0.796735
1.62221	0.783717		-0.330682	0.713509		2.96413	0.675217		1.79185	0.687574		1.21142	0.799788		0.484593	0.839901		1.05442	0.661966		1.53758	0.834158		1.09865	0.852221		2.53208	0.8184		1.28698	0.794155		-1.94424	0.790872		1.53893	0.738359		2.16565	0.758867		1.25758	0.698356		1.2682	0.79254		0.0811874	0.792082
1.84295	0.750212		0.721277	0.693952		2.10918	0.731355		1.76884	0.688455		1.55383	0.810064		0.531532	0.835346		1.00103	0.678636		0.93993	0.831504		1.18191	0.849791		1.85076	0.799138		1.16567	0.777321		-1.53428	0.845661		0.165375	0.749219		1.10478	0.727206		1.44286	0.703762		1.29524	0.800218		-0.386417	0.792524
3.05667	0.687104		1.7903	0.65859		1.72236	0.756817		1.86246	0.685747		1.15363	0.837528		-0.773992	0.776209		0.891812	0.66146		-0.362292	0.835799		1.44273	0.844848		1.33102	0.800517		0.977793	0.797209		-1.76819	0.802685		-0.147866	0.750792		2.02539	0.753731		1.13177	0.679947		1.30395	0.801021		-0.238308	0.785431
2.75272	0.705285		1.46558	0.65573		1.45389	0.772468		1.75659	0.689499		1.52035	0.812183		0.823623	0.832431		0.989207	0.664239		-0.415353	0.849677		1.36167	0.846254		0.998042	0.817247		0.825849	0.805901		-2.1875	0.757744		-0.0482428	0.761451		1.57901	0.747252		0.680491	0.655844		1.33817	0.801712		0.248275	0.800905
1.37285	0.763398		0.375287	0.711117		0.745666	0.790661		1.84126	0.697913		0.465492	0.848495		-0.550228	0.772108		1.46862	0.687757		0.0437812	0.844196		1.14745	0.85489		1.06884	0.81243		0.897032	0.790814		-3.00768	0.684493		0.656482	0.752897		1.31359	0.754859		0.0631506	0.642951		1.34193	0.799825		0.0837968	0.811507
0.928784	0.789059		-0.226907	0.710397		0.992544	0.787334		1.6967	0.687649		1.06353	0.824621		-1.11978	0.776344		1.79373	0.687303		0.661803	0.844694		1.47771	0.852076		1.10746	0.814824		0.637258	0.79113		-1.81375	0.776832		0.159593	0.759111		1.09409	0.721561		-1.65454	0.524978		1.26746	0.796393		-0.263497	0.813998
0.879532	0.78953		-0.36076	0.713226		2.84108	0.666894		1.68049	0.689074		3.02239	0.757813		-2.48236	0.751159		1.59907	0.692443		-0.215103	0.839597		1.49507	0.858595		1.23098	0.816729		0.809449	0.779416		-2.2711	0.730608		-0.20584	0.739053		1.19887	0.741345		0.0746197	0.609056		1.18881	0.794476		0.20093	0.80468
0.827223	0.795326		-0.307287	0.714013		3.11827	0.678462		1.67433	0.687435		1.56679	0.822168		-1.70633	0.798772		1.20114	0.685172		0.876248	0.83375		1.1518	0.854666		1.32825	0.813315		1.31402	0.774236		-2.46077	0.678978		-0.268083	0.745867		0.951071	0.759296		0.252216	0.683252		1.15361	0.798243		-0.0197474	0.810171
0.938037	0.796994		0.0627202	0.716636		1.80389	0.744082		1.65931	0.690875		-0.00777672	0.842689		0.924517	0.798815		1.10765	0.668239		1.24994	0.839817		1.36994	0.855177		1.24738	0.812366		2.04535	0.773819		-1.89306	0.759538		-0.226504	0.739429		0.686306	0.764025		0.438089	0.68988		1.18913	0.800069		0.59494	0.79315
2.01218	0.75312		-0.286001	0.705856		0.904085	0.77808		1.71791	0.688762		-0.0893949	0.839993		0.326887	0.78018		1.2293	0.667914		-0.107447	0.844143		1.39196	0.845411		1.60869	0.809079		2.1402	0.765563		-2.2423	0.718724		0.197459	0.754336		0.785688	0.745301		0.0475869	0.683981		1.23951	0.798205		0.286548	0.813054
1.48215	0.755201		0.496331	0.693272		0.606245	0.783698		1.74528	0.684928		0.215989	0.845907		-0.150335	0.790603		1.29964	0.66765		-0.556519	0.838427		1.35122	0.838968		0.114485	0.809635		1.98481	0.769372		-2.79007	0.713462		1.76063	0.723332		0.611392	0.735793		0.180215	0.668655		1.41916	0.803463		0.250881	0.803531
0.955754	0.782215		0.388797	0.702173		0.864362	0.781272		1.6029	0.688046		0.0820603	0.840866		-0.658636	0.80509		1.28563	0.663993		-0.0368835	0.849392		1.52287	0.847002		0.226693	0.811028		2.00498	0.767685		-1.68375	0.800813		1.49197	0.736787		0.628988	0.746961		-0.0816969	0.696733		1.38912	0.813098		0.173475	0.814028
0.786835	0.934034		0.107112	0.882053		1.58625	0.922412		0.600814	0.887965		0.220103	0.951534		0.662262	0.85882		0.0441227	0.970161		0.78616	0.823107		1.77168	0.918202		1.16921	0.913395		0.127431	0.957086		0.209047	0.967858		-1.80897	0.90819		0.24847	0.957098		-0.128135	0.948039		1.46448	0.851616		0.359031	0.954052
0.420786	0.956886		0.126281	0.884405		1.00294	0.925056		0.81473	0.903917		1.2964	0.929657		1.17929	0.927888		-0.103649	0.973315		0.387006	0.742935		1.65486	0.947277		0.611484	0.944725		-0.00444596	0.972295		1.84858	0.92244		-1.81028	0.900963		0.241706	0.959722		-0.152803	0.966568		2.46904	0.87279		0.964415	0.936074
0.101099	0.960706		-0.227468	0.884546		0.0577696	0.939162		0.560132	0.926737		0.277793	0.975414		0.995394	0.944116		-0.276404	0.951802		-0.0809156	0.708383		1.30938	0.955525		0.836412	0.95351		0.151287	0.959703		0.352235	0.962643		-1.60708	0.900777		0.564365	0.889944		-0.250986	0.967365		2.39076	0.886512		0.824745	0.953956
0.00489492	0.963129		-0.220274	0.88893		0.831007	0.946165		0.631448	0.912642		0.116139	0.975845		-0.00981492	0.973302		-0.26929	0.954406		-0.0869178	0.705151		0.835325	0.942536		0.467383	0.955459		0.00138101	0.973427		1.74985	0.913435		-1.71729	0.882548		0.299326	0.894255		-0.122292	0.972233		2.10168	0.889961		-0.0184142	0.951162
0.156969	0.970404		-0.532298	0.866396		0.637823	0.949081		0.109391	0.942353		-0.0123809	0.974437		0.946762	0.945886		-0.180916	0.964793		-0.186168	0.749861		0.561574	0.941728		0.170591	0.954751		-0.170087	0.976116		0.807071	0.944625		-1.63773	0.923194		-0.00341154	0.969004		-0.0227304	0.975055		0.754014	0.958881		-1.3007	0.933609
0.113715	0.977187		-0.431481	0.881956		0.933077	0.941647		-0.749825	0.908329		1.01554	0.932759		0.306718	0.968088		-0.708994	0.881742		-0.340044	0.816626		0.688546	0.951838		0.261258	0.964115		0.0575822	0.965861		-0.0608555	0.971918		-1.36553	0.923572		0.0343287	0.974092		-0.26161	0.977069		-0.0399746	0.956843		0.727454	0.95913
0.313926	0.978117		0.0524346	0.885869		0.15035	0.959867		-1.05009	0.896443		0.317799	0.975099		0.95785	0.937468		-0.19909	0.946869		0.112343	0.862925		0.462696	0.934797		0.47714	0.959935		-0.343637	0.97618		-0.000622272	0.981002		-0.682381	0.961991		0.128742	0.974696		-0.292567	0.980744		-0.216317	0.965594		0.66146	0.965909
0.0818739	0.982138		0.110403	0.902058		0.915634	0.936528		-1.09712	0.907055		-0.41683	0.970873		0.828033	0.95847		0.480032	0.966762		1.69264	0.890212		0.357017	0.949962		0.372945	0.96576		-0.623603	0.973914		-0.146887	0.977536		-0.116377	0.96853		0.146871	0.969218		-0.217785	0.980267		0.20512	0.969206		0.713303	0.949915
-0.0854857	0.982789		-0.338256	0.88761		-0.295392	0.95983		-1.14016	0.907536		-0.407573	0.968593		0.452484	0.979554		0.35736	0.973182		0.0463687	0.958095		-0.14248	0.946896		0.398837	0.967829		0.0353564	0.94953		-0.38992	0.968042		-0.311459	0.956638		0.245953	0.951577		0.147488	0.979292		-0.0379017	0.976339		-0.0487772	0.965007
0.0842676	0.97973		-0.611959	0.854335		1.37214	0.93343		-1.18255	0.90564		1.61526	0.922228		0.639988	0.95704		-0.0804999	0.979038		-0.0864166	0.970616		0.428164	0.976603		0.515605	0.971713		-0.072847	0.978969		0.288753	0.97986		-1.83164	0.905871		0.299084	0.940371		-0.397595	0.984498		-0.29095	0.971599		-0.697817	0.957404
-0.135232	0.980877		-0.252864	0.953544		0.321085	0.951943		-0.90332	0.940517		0.16239	0.982192		0.421667	0.945329		0.0342763	0.982701		-0.176528	0.97482		0.240272	0.980469		0.392989	0.960952		-0.444244	0.975191		-0.283366	0.975773		-1.84551	0.911938		-0.0975523	0.981714		-0.244272	0.985706		-0.0924401	0.974037		-1.60638	0.930624
-0.127927	0.984656		0.431778	0.965597		-0.513532	0.923635		-1.16737	0.91467		1.04992	0.949535		0.225454	0.885421		-0.377643	0.952469		-0.410425	0.970371		-0.119533	0.967886		0.196659	0.951162		-0.468962	0.974762		-0.53324	0.961911		-1.78719	0.890659		0.0546535	0.980193		-0.486925	0.988694		-0.323618	0.977433		-1.80997	0.928718
0.212094	0.982128		-0.0890909	0.988971		0.610193	0.968364		-1.097	0.934106		0.640828	0.973569		0.690215	0.862979		-0.468654	0.922682		-0.42917	0.972317		0.00840808	0.976447		-0.0725125	0.956522		0.33664	0.930395		-0.277461	0.977582		-2.12709	0.843548		0.101792	0.986533		-0.302106	0.989368		-0.24513	0.967381		-1.12779	0.932723
0.00635098	0.984466		0.21941	0.981409		1.10051	0.932227		-0.582347	0.969064		1.31941	0.955446		0.472896	0.879555		-0.160959	0.97694		-0.233106	0.978906		-0.512836	0.944166		-0.150411	0.960859		-0.0299645	0.972045		-1.18624	0.933147		-1.63399	0.94777		0.0448643	0.976563		-0.10759	0.990677		2.34621	0.889818		-1.82648	0.922574
0.0272984	0.989693		-0.37118	0.970847		0.89386	0.94013		-0.963644	0.947515		0.297401	0.986579		0.361401	0.917077		-0.700273	0.864561		-0.0423681	0.97969		0.677076	0.983836		0.131498	0.96609		-0.192508	0.972002		-0.305361	0.976837		-1.72698	0.941109		0.0906183	0.972642		-0.17256	0.991098		1.936	0.888373		-0.617813	0.953303
-0.117942	0.988785		-0.140362	0.97737		0.623721	0.956662		-0.998478	0.928959		-0.422363	0.982831		0.317463	0.957719		-0.410557	0.949425		-0.201389	0.980196		0.133254	0.985033		-0.30925	0.96648		-0.359932	0.97042		-0.743651	0.97128		-1.48834	0.945385		-0.0228979	0.945884		-0.144593	0.992598		1.75203	0.90156		-0.850263	0.956152
0.135584	0.988429		-0.853422	0.943093		-0.0234256	0.957459		-1.09923	0.920078		-0.0400748	0.970672		0.691877	0.952016		-0.446555	0.947647		-0.130487	0.982428		0.216869	0.987879		-0.254144	0.986923		0.123377	0.955183		-0.549213	0.975305		-1.46611	0.901834		0.352317	0.875568		0.0459653	0.992013		0.255559	0.98391		-1.10139	0.970487
0.0681353	0.991126		0.719923	0.966434		-0.786984	0.93003		-1.07163	0.94863		0.0424355	0.986688		0.559509	0.976645		0.346661	0.975968		0.724674	0.970389		0.252671	0.991659		-0.0229162	0.991964		-0.0626507	0.979915		1.39389	0.949678		-1.37198	0.942498		0.16744	0.979221		-0.167041	0.994542		0.341368	0.964795		-0.1023	0.989065
0			0			0			0			0			0			0			0			0			0			0			0			0			0			0			0			0
0.0279627	0.989153		0.427123	0.960792		1.32965	0.930994		-0.808678	0.950819		-0.509015	0.987297		0.153759	0.979373		-0.407438	0.954156		0.232482	0.978482		0.0260929	0.989721		0.133498	0.989945		-0.527793	0.971339		-0.0356689	0.98908		-1.56965	0.958683		0.396516	0.978905		0.252184	0.995407		0.907658	0.951237		-0.207694	0.99236
-0.135006	0.991511		0.676002	0.944084		0.191771	0.958673		-0.73504	0.961823		-0.527326	0.983237		0.206644	0.961094		-0.201351	0.980016		0.419988	0.953726		-0.104569	0.987123		0.635248	0.986006		0.209664	0.973865		-0.36143	0.975431		-1.98468	0.923127			0.983185		0.0223545	0.993751		-0.297382	0.977993		-0.0279436	0.986054
-0.126382	0.984606		0.155685	0.965236		0.208284	0.96669		-1.06967	0.920107		-0.229499	0.983873		-0.225015	0.959655		-0.5312	0.927108		1.02656	0.943033		0.562809	0.965259		0.340729	0.974493		0.0237738	0.990257		-0.68399	0.957862		-2.06868	0.916568		-0.100546	0.986288		-0.129415	0.992094		-0.366478	0.975633		0.0978034	0.981966
-0.346201	0.984412		-0.275174	0.967591		0.761816	0.939251		-0.993632	0.930524		-0.516677	0.9812		0.739921	0.919295		-0.485309	0.906891		0.157909	0.957257		0.17529	0.972489		-0.0778968	0.958696		0.166536	0.975665		-1.35088	0.907767		-1.73353	0.949744		0.390621	0.982659		0.105315	0.991479		-0.506146	0.969272		0.128579	0.979558
-0.315504	0.977188		-0.28405	0.979454		0.346918	0.95561		-0.822174	0.952867		0.562908	0.963646		0.978722	0.910113		0.0367296	0.977545		-0.409914	0.971002		0.271962	0.984544		-0.663953	0.968891		-0.45362	0.966568		0.300068	0.960094		-0.738032	0.977192			0.970347		-0.134555	0.987803		0.763154	0.9329		-0.0022976	0.975122
-0.0682362	0.972269		-0.683476	0.894801		-0.782881	0.910796		-1.04829	0.937822		0.490037	0.957464		0.54293	0.953662		-0.416001	0.935808		-0.377927	0.975292		-0.277495	0.987113		-0.770868	0.95803		0.0716372	0.985881		1.72973	0.921788		-1.23939	0.945957		-0.00308236	0.972091		0.0666321	0.989565		0.286571	0.984464		-0.194426	0.97853
-0.0245555	0.966066		-0.0957238	0.886978		-0.843019	0.918289		-1.18481	0.923853		0.516282	0.948001		0.346793	0.953821		-1.02501	0.864413		-0.0386721	0.974939		-0.311674	0.985643		-0.53847	0.955477		-0.184904	0.989151		0.0312741	0.979725		-2.04012	0.875624		0.520775	0.928946		0.290886	0.985656		-0.49887	0.959977		0.217466	0.977994
-0.227222	0.958802		1.15375	0.850216		-0.853176	0.923047		-1.14245	0.925359		1.61712	0.932693		0.292342	0.955358		0.186743	0.967803		-0.476896	0.958983		-0.383055	0.982396		-0.829533	0.94348		-0.121408	0.988849		-0.0741896	0.986956		-2.01319	0.895764		-0.4409	0.966145		-0.108628	0.987445		-0.543084	0.968724		-0.170453	0.976257
2.93604	0.841815		2.71472	0.784275		-0.767164	0.923427		-1.02209	0.924553		0.0390134	0.977439		0.537911	0.918993		-0.301302	0.955367		1.3789	0.929437		0.10579	0.98189		-0.364414	0.950473		0.0691201	0.982398		-0.0749394	0.984878		-1.84394	0.897857		0.978141	0.97142		-0.0849644	0.985893		0.654348	0.942343		-0.433837	0.972257
2.75367	0.815751		2.41132	0.786391		-0.726095	0.933233		-1.09932	0.912885		1.15136	0.938022		1.03911	0.854437		-0.69742	0.867175		-0.0932884	0.920921		0.103832	0.985478		-0.0661504	0.955361		-0.613735	0.958235		-0.314141	0.969438		-2.17594	0.844761		0.3602	0.971497		0.103192	0.984594		-0.401654	0.96773		-0.637775	0.976496
1.78712	0.842066		1.69919	0.813102		-0.782325	0.911659		-0.592603	0.939812		-0.00615928	0.957962		0.527146	0.851508		0.479532	0.945466		-0.00792267	0.897943		-0.189061	0.983623		0.0708701	0.956702		0.471318	0.937319		-0.134009	0.975588		-1.61612	0.932276		0.773977	0.956414		0.1654	0.984206		-0.323251	0.955272		-0.226148	0.970337
2.34097	0.757291		1.79347	0.67898		1.87088	0.824501		1.0852	0.763301		-0.218177	0.843757		2.24639	0.770727		2.32791	0.696954		0.626713	0.838707		1.10069	0.804657		1.38111	0.831292		2.38151	0.738769		-0.0975769	0.87196		1.64745	0.812655		2.78388	0.716198		1.01653	0.751659		0.674348	0.798252		0.608123	0.820567
2.02789	0.755896		2.83115	0.661296		2.10539	0.805517		1.65717	0.764134		-0.112506	0.839904		2.0694	0.77345		2.06159	0.691737		2.69357	0.784589		-0.283792	0.823792		1.57039	0.853005		2.29676	0.745057		-0.487888	0.867911		-0.141675	0.794556		2.85815	0.707059		1.0287	0.748078		2.26322	0.748283		0.795779	0.820207
1.15918	0.777174		2.57517	0.661998		1.50683	0.80804		1.27458	0.76543		1.15644	0.822145		1.61402	0.78687		1.79225	0.688935		0.738267	0.851955		-1.21648	0.789489		1.6587	0.854482		2.22577	0.747153		-0.900401	0.82949		-0.467289	0.823714		2.63497	0.735467		1.30237	0.73474		1.93216	0.762901		0.815935	0.817418
1.16904	0.786364		1.62763	0.708119		0.482739	0.776351		0.497955	0.791404		0.560069	0.841993		1.48636	0.787859		1.60439	0.681744		0.395273	0.853083		-0.568481	0.8162		1.83971	0.84419		2.20049	0.758494		-0.429298	0.869424		-1.04931	0.795288		2.56507	0.724148		1.71906	0.730187		1.92157	0.762014		0.790213	0.80221
1.50842	0.780813		0.462994	0.73308		-0.0805502	0.762343		0.646592	0.783274		0.93073	0.845744		1.69376	0.813104		1.67891	0.678313		1.03942	0.845845		1.28997	0.843495		1.95727	0.844075		2.22996	0.763616		-0.702079	0.853277		-0.96038	0.790268		1.84164	0.742254		1.60713	0.718265		1.79153	0.758594		0.860101	0.818974
1.1931	0.781527		0.439229	0.731068		-0.16947	0.762255		0.631434	0.784227		-0.473347	0.865495		0.919355	0.826102		1.68748	0.678408		1.73947	0.827379		2.65417	0.84859		1.64379	0.846904		1.71956	0.780777		-1.02697	0.829124		-1.29037	0.810926		2.95273	0.746642		0.912059	0.743091		1.49291	0.769464		0.831806	0.824581
1.14062	0.789992		0.753185	0.72301		-0.281514	0.76225		1.56448	0.738917		0.0138825	0.848571		1.7876	0.751911		1.62478	0.675356		1.6476	0.831104		2.37006	0.86274		1.76132	0.851619		2.20846	0.75908		-0.269711	0.876709		-1.08715	0.814125		2.88168	0.730843		0.503429	0.744287		1.56408	0.770012		0.830151	0.814629
1.07287	0.782858		0.476829	0.725465		-0.151314	0.768131		1.30787	0.73469		0.59562	0.845826		1.13395	0.80368		1.64489	0.679452		2.27271	0.817163		1.68147	0.866267		1.98279	0.84643		1.3758	0.78152		-0.673812	0.824126		-0.335631	0.816872		1.73972	0.691821		0.812134	0.749043		1.53764	0.768756		0.0952268	0.825185
1.91357	0.771455		0.549872	0.724631		0.175836	0.82227		1.0402	0.743773		1.09283	0.806899		0.82704	0.813786		1.63879	0.671977		0.675471	0.827619		1.37826	0.856964		2.03506	0.842283		2.15553	0.746136		-1.59819	0.78005		-0.329461	0.820648		2.00993	0.728268		1.35405	0.737306		1.16488	0.804899		0.240145	0.828686
1.80302	0.758408		0.406962	0.726508		2.1174	0.803305		0.973099	0.739154		-0.0902345	0.862256		-0.00447376	0.818313		1.6751	0.675882		0.6084	0.840547		0.947293	0.868927		1.74938	0.845456		1.27506	0.775689		-0.334918	0.850438		-1.34556	0.776901		1.2636	0.714452		1.27807	0.700182		1.5828	0.761635		0.71838	0.800162
1.21225	0.78961		0.416906	0.727766		1.2837	0.804007		0.969841	0.738609		0.14559	0.834571		-0.330557	0.792158		1.65159	0.685492		1.34787	0.819051		0.697522	0.866583		1.79174	0.8472		1.62308	0.77644		-0.551211	0.845087		-1.12685	0.797538		1.06242	0.727209		0.964024	0.69744		1.68914	0.763708		1.02061	0.7965
1.02706	0.79631		1.35825	0.688426		-0.198567	0.749824		0.975175	0.731821		1.82849	0.794737		0.794885	0.794182		1.40428	0.679588		1.99705	0.828748		1.34123	0.868511		1.56596	0.834841		1.66068	0.773352		-0.666869	0.843769		-1.44573	0.777822		0.981399	0.729825		1.24782	0.708619		1.78227	0.761063		1.7607	0.793465
1.19288	0.78942		1.92728	0.679845		0.154729	0.797181		0.952627	0.73024		0.0340978	0.851809		0.839359	0.798645		1.44445	0.672483		0.41974	0.848174		1.26167	0.866601		1.60822	0.839727		1.512	0.783982		-1.45063	0.764385		-1.08349	0.783435		1.75879	0.739398		1.54662	0.709628		1.80185	0.75391		1.66253	0.765456
1.20031	0.782549		0.567846	0.710477		0.0995181	0.783267		0.87461	0.732753		-0.0678354	0.861004		0.0880605	0.82342		1.45955	0.668824		0.29455	0.844342		1.44406	0.867988		1.29278	0.842003		1.44216	0.781778		-1.38194	0.784994		-1.20746	0.765808		2.26946	0.734646		1.45004	0.711118		1.76494	0.758742		1.16016	0.77717
1.29535	0.787995		0.266771	0.721477		-0.0421038	0.764681		0.896365	0.738256		1.01416	0.793292		0.724604	0.823143		1.50872	0.673549		1.65271	0.798797		1.57871	0.866481		1.3312	0.829937		1.99013	0.774257		-0.293389	0.848062		-1.58222	0.742901		1.68233	0.74008		1.52619	0.706508		1.94862	0.760687		1.01582	0.781162
1.34518	0.775062		0.326029	0.721483		-0.0838638	0.772282		0.822455	0.732875		1.27036	0.826425		0.712642	0.830343		1.49497	0.676517		1.99929	0.813562		1.358	0.866023		1.37841	0.83533		1.89727	0.784839		0.857047	0.82856		-0.853117	0.789459		1.91284	0.736822		1.59657	0.698504		1.9685	0.745588		0.432781	0.782799
1.16766	0.795585		0.464751	0.723866		-0.173573	0.784908		0.915018	0.727045		-0.0476607	0.846367		0.984595	0.825178		1.59277	0.6804		0.292086	0.847075		1.54864	0.862565		2.71973	0.813394		1.22552	0.78729		0.490937	0.85119		-1.06887	0.760614		2.21108	0.70549		1.15086	0.692427		1.80545	0.752555		-0.73068	0.785309
1.30623	0.790078		0.412163	0.711927		2.3491	0.810701		0.7272	0.719011		0.0554541	0.844281		0.2253	0.832729		1.4254	0.67642		1.06143	0.810472		1.22522	0.860815		2.9049	0.825489		0.902735	0.796089		-0.127416	0.869625		-0.766367	0.79074		2.3186	0.712404		0.351863	0.680945		1.78615	0.754659		0.0842102	0.794981
1.69035	0.788225		0.389241	0.714243		2.17714	0.802709		0.720227	0.720732		1.25386	0.781716		1.0441	0.832259		1.40108	0.666842		2.26225	0.787476		1.35132	0.856728		2.50917	0.825292		1.22433	0.795216		-0.550346	0.854901		0.166949	0.819395		2.33309	0.723224		1.09054	0.702696		1.60957	0.75655		-0.0211123	0.792073
1.91109	0.753273		1.4412	0.669238		1.3222	0.820194		0.697217	0.720114		1.59627	0.791924		1.09104	0.825272		1.34769	0.682519		1.6646	0.798891		1.43458	0.852845		1.82785	0.802686		1.10302	0.782418		-0.140388	0.878242		-1.20661	0.794713		1.27222	0.685471		1.27582	0.705701		1.6366	0.763344		-0.488717	0.794222
3.1248	0.698789		2.51022	0.62638		0.935378	0.81535		0.790837	0.714032		1.19607	0.825484		-0.214483	0.811819		1.23847	0.664792		0.362382	0.831867		1.6954	0.846966		1.3081	0.807482		0.915142	0.792355		-0.3743	0.859469		-1.51985	0.778345		2.19283	0.719231		0.964729	0.681692		1.64532	0.764653		-0.340608	0.784481
2.82086	0.716368		2.1855	0.620072		0.666911	0.820476		0.684966	0.721185		1.56278	0.797526		1.38313	0.812853		1.33587	0.669336		0.309321	0.838987		1.61434	0.847303		0.975125	0.825826		0.763198	0.800798		-0.79361	0.829933		-1.42023	0.797321		1.74645	0.708172		0.51345	0.656169		1.67954	0.763007		0.145975	0.799514
1.44099	0.760601		1.09521	0.688207		-0.0413172	0.763563		0.769638	0.728574		0.507928	0.842986		0.00928116	0.808338		1.81528	0.691236		0.768455	0.817102		1.40012	0.857504		1.04593	0.819834		0.834382	0.78978		-1.61379	0.768005		-0.715501	0.802404		1.48103	0.715552		-0.10389	0.644223		1.6833	0.762028		-0.0185028	0.814506
0.996919	0.787214		0.493016	0.711851		0.20556	0.779113		0.625077	0.717686		1.10596	0.810286		-0.560267	0.81253		2.14039	0.695316		1.38648	0.811341		1.73038	0.855343		1.08454	0.823891		0.574607	0.787568		-0.419853	0.830826		-1.21239	0.794894		1.26153	0.68098		-1.82158	0.527329		1.60882	0.758099		-0.365797	0.819109
0.947668	0.788921		0.359162	0.712462		2.0541	0.80657		0.608862	0.722362		3.06483	0.731707		-1.92285	0.786786		1.94573	0.696606		0.509571	0.829722		1.74775	0.862472		1.20806	0.825538		0.746798	0.780278		-0.877207	0.811377		-1.57782	0.766392		1.36631	0.7036		-0.0924211	0.610727		1.53018	0.756158		0.0986303	0.806514
0.895358	0.795335		0.412636	0.707491		2.33128	0.800818		0.602703	0.719571		1.60923	0.803965		-1.14683	0.797441		1.5478	0.693314		1.60092	0.782296		1.40447	0.859619		1.30533	0.820994		1.25137	0.77719		-1.06688	0.757939		-1.64007	0.770041		1.11851	0.720024		0.0851751	0.68547		1.49498	0.760986		-0.122047	0.813016
1.00617	0.797434		0.782643	0.704446		1.0169	0.796037		0.587682	0.721878		0.0346588	0.836613		1.48403	0.755639		1.45431	0.675745		1.97462	0.796284		1.62261	0.859316		1.22447	0.821409		1.9827	0.783357		-0.499169	0.831559		-1.59849	0.767685		0.853746	0.727311		0.271049	0.692034		1.5305	0.76188		0.49264	0.79377
2.08032	0.75739		0.433922	0.711835		0.117102	0.755779		0.646284	0.716043		-0.0469594	0.837623		0.886396	0.755672		1.57596	0.674357		0.617227	0.824472		1.64463	0.853651		1.58577	0.815138		2.07755	0.771047		-0.848409	0.80871		-1.17452	0.792157		0.953128	0.704023		-0.119454	0.686769		1.58088	0.758711		0.184248	0.812683
1.55028	0.755216		1.21625	0.675703		-0.180739	0.74574		0.673652	0.718105		0.258425	0.838638		0.409174	0.777305		1.6463	0.67432		0.168155	0.838531		1.6039	0.846915		0.0915688	0.815692		1.92216	0.769704		-1.39617	0.782252		0.388644	0.818073		0.778832	0.695996		0.0131739	0.670727		1.76053	0.770628		0.148581	0.811422
1.02389	0.780039		1.10872	0.673351		0.0773782	0.759153		0.531279	0.716053		0.124496	0.836113		-0.0991266	0.818522		1.63229	0.670418		0.687791	0.821315		1.77554	0.852232		0.203777	0.819285		1.94232	0.77307		-0.289856	0.847212		0.119985	0.813236		0.796428	0.708494		-0.248738	0.698147		1.73049	0.774631		0.0711749	0.819408
0.758873	0.924639		-0.320011	0.887337		0.256605	0.962847		1.40949	0.816347		0.729119	0.942257		0.508502	0.841302		0.451561	0.941314		0.553678	0.860536		1.74559	0.91094		1.03571	0.921081		0.655224	0.910981		0.244716	0.971987		-0.239316	0.93692		-0.148046	0.945227		-0.380319	0.952224		0.556823	0.896953		0.566724	0.949315
0.392824	0.948015		-0.300841	0.905925		-0.326708	0.964268		1.62341	0.850014		1.80541	0.898973		1.02553	0.906841		0.303789	0.945642		0.154524	0.786528		1.62877	0.944273		0.477986	0.947471		0.523347	0.942046		1.88425	0.910644		-0.240624	0.944784		-0.15481	0.956124		-0.404987	0.966835		1.56138	0.923593		1.17211	0.927945
0.0731358	0.954161		-0.654591	0.881507		-1.27188	0.879788		1.36881	0.88302		0.786809	0.96038		0.841634	0.923574		0.131034	0.975876		-0.313398	0.750411		1.28329	0.951174		0.702914	0.956349		0.67908	0.903439		0.387904	0.954682		-0.0374267	0.938269		0.167849	0.929429		-0.50317	0.967444		1.48311	0.930174		1.03244	0.951188
-0.0230678	0.952001		-0.647397	0.880093		-0.49864	0.969913		1.44013	0.857873		0.625154	0.965318		-0.163574	0.959372		0.138148	0.980724		-0.3194	0.747144		0.809232	0.9495		0.333885	0.957515		0.529174	0.93923		1.78552	0.90286		-0.147632	0.927026		-0.0971904	0.931515		-0.374476	0.971776		1.19402	0.926325		0.189279	0.950488
0.129007	0.971282		-0.959421	0.852587		-0.691824	0.968819		0.918069	0.928094		0.496634	0.975823		0.793003	0.926957		0.226522	0.96947		-0.418651	0.783133		0.535481	0.949043		0.0370938	0.960949		0.357706	0.930292		0.84274	0.93311		-0.0680749	0.946666		-0.399927	0.954795		-0.274914	0.975239		-0.153644	0.922626		-1.09301	0.933595
0.0857519	0.973792		-0.858604	0.879066		-0.39657	0.975636		0.058853	0.946193		1.52456	0.905424		0.152959	0.949551		-0.301556	0.962317		-0.572526	0.843437		0.662453	0.957682		0.12776	0.964319		0.585375	0.917423		-0.0251866	0.967565		0.204126	0.953022		-0.362187	0.954959		-0.513793	0.976923		-0.947633	0.915752		0.935148	0.954634
0.285963	0.975971		-0.374688	0.916561		-1.1793	0.92609		-0.241413	0.942149		0.826814	0.96231		0.804091	0.918199		0.208348	0.946809		-0.120139	0.895534		0.436603	0.950156		0.343642	0.965995		0.184156	0.967314		0.0350466	0.982497		0.887273	0.958525		-0.267774	0.965196		-0.544751	0.979702		-1.12397	0.920307		0.869153	0.96158
0.0539112	0.977056		-0.316719	0.911785		-0.414014	0.980197		-0.288446	0.94733		0.092185	0.976271		0.674274	0.936181		0.88747	0.897826		1.46016	0.918789		0.330924	0.959118		0.239448	0.965236		-0.0958097	0.979261		-0.111218	0.980701		1.45328	0.956879		-0.249645	0.955905		-0.469969	0.978789		-0.702538	0.955115		0.920996	0.943562
-0.113448	0.975902		-0.765379	0.88632		-1.62504	0.871694		-0.331485	0.949952		0.101442	0.975829		0.298725	0.969672		0.764798	0.91879		-0.186114	0.959691		-0.168573	0.958993		0.265339	0.968856		0.563149	0.874172		-0.354251	0.975299		1.2582	0.948894		-0.150563	0.966109		-0.104696	0.979455		-0.94556	0.947561		0.158916	0.963666
0.0563048	0.98335		-1.03908	0.840656		0.0424909	0.9847		-0.373868	0.951398		2.12427	0.89041		0.486229	0.937918		0.326938	0.960684		-0.318899	0.972404		0.402071	0.97186		0.382107	0.97309		0.454946	0.942313		0.324422	0.97979		-0.261991	0.947735		-0.0974319	0.965782		-0.649779	0.982229		-1.19861	0.930779		-0.490123	0.957314
-0.163195	0.978219		-0.679987	0.951796		-1.00856	0.930847		-0.0946416	0.963406		0.671406	0.971804		0.267907	0.921918		0.441714	0.96053		-0.409011	0.967619		0.21418	0.97893		0.259491	0.967136		0.083549	0.981053		-0.247697	0.981978		-0.275857	0.949838		-0.494068	0.973189		-0.496455	0.985892		-1.0001	0.940739		-1.39868	0.927698
-0.15589	0.985901		0.00465529	0.968552		-1.84318	0.79753		-0.358691	0.956216		1.55894	0.923276		0.0716948	0.8622		0.0297946	0.986754		-0.642907	0.951556		-0.145626	0.975802		0.0631617	0.960365		0.0588314	0.962827		-0.497571	0.969575		-0.217533	0.931735		-0.341862	0.965918		-0.739109	0.988358		-1.23128	0.935099		-1.60228	0.926531
0.184131	0.982003		-0.516214	0.956189		-0.719454	0.972379		-0.288323	0.965104		1.14984	0.954559		0.536456	0.838038		-0.0612161	0.982687		-0.661652	0.959449		-0.0176848	0.976892		-0.20601	0.96588		0.864433	0.849265		-0.241792	0.98339		-0.557433	0.893467		-0.294724	0.968423		-0.55429	0.988009		-1.15279	0.950337		-0.920096	0.931656
-0.0216118	0.985765		-0.207713	0.979314		-0.229134	0.986104		0.226331	0.958636		1.82842	0.926951		0.319137	0.853492		0.246479	0.972804		-0.465588	0.968406		-0.538929	0.960926		-0.283908	0.964878		0.497828	0.943536		-1.15058	0.941708		-0.0643343	0.970425		-0.351652	0.952801		-0.359774	0.989022		1.43856	0.940834		-1.61878	0.919832
-0.000664307	0.988687		-0.798303	0.925282		-0.435787	0.981058		-0.154965	0.978882		0.806416	0.97313		0.207642	0.896182		-0.292835	0.952969		-0.274851	0.971843		0.650984	0.979944		-0.00199938	0.965979		0.335285	0.943115		-0.269692	0.979997		-0.157324	0.968176		-0.305898	0.958871		-0.424744	0.990936		1.02834	0.95095		-0.41012	0.955061
-0.145905	0.988166		-0.567485	0.943216		-0.705927	0.960089		-0.1898	0.963676		0.0866524	0.988909		0.163703	0.936367		-0.00311924	0.976857		-0.433871	0.969139		0.107161	0.985755		-0.442748	0.971384		0.167861	0.96295		-0.707982	0.976703		0.0813115	0.978272		-0.419414	0.938063		-0.396777	0.991102		0.844372	0.956771		-0.64257	0.960425
0.107621	0.989085		-1.28055	0.896847		-1.35307	0.906462		-0.290549	0.968475		0.46894	0.958312		0.538117	0.935164		-0.0391174	0.986994		-0.36297	0.969174		0.190776	0.988161		-0.387642	0.984966		0.65117	0.8936		-0.513544	0.978065		0.103547	0.94543		-0.0441987	0.905168		-0.206219	0.991675		-0.652099	0.94399		-0.893696	0.972638
0.0401726	0.991466		0.2928	0.975198		-2.11663	0.788703		-0.262948	0.972532		0.551451	0.975291		0.40575	0.961105		0.754099	0.90543		0.492192	0.968369		0.226578	0.989339		-0.156414	0.990488		0.465142	0.957132		1.42956	0.935147		0.197671	0.971869		-0.229076	0.982194		-0.419225	0.993531		-0.56629	0.976523		0.105394	0.986783
-0.0279627	0.989153		-0.427123	0.960792		-1.32965	0.930994		0.808678	0.950819		0.509015	0.987297		-0.153759	0.979373		0.407438	0.954156		-0.232482	0.978482		-0.0260929	0.989721		-0.133498	0.989945		0.527793	0.971339		0.0356689	0.98908		1.56965	0.958683		-0.396516	0.978905		-0.252184	0.995407		-0.907658	0.951237		0.207694	0.99236
0			0			0			0			0			0			0			0			0			0			0			0			0			0			0			0			0
-0.162969	0.985075		0.248879	0.977519		-1.13788	0.93269		0.0736379	0.978603		-0.0183103	0.992373		0.0528849	0.971068		0.206087	0.985556		0.187506	0.975173		-0.130662	0.990161		0.50175	0.986903		0.737457	0.912817		-0.325762	0.979458		-0.415028	0.976112			0.973145		-0.229829	0.996014		-1.20504	0.926716		0.17975	0.986839
-0.154345	0.985352		-0.271438	0.967289		-1.12136	0.957488		-0.260988	0.966714		0.279516	0.988878		-0.378774	0.967624		-0.123763	0.98141		0.794076	0.956026		0.536716	0.979902		0.207231	0.980228		0.551567	0.957815		-0.648321	0.96609		-0.499025	0.964568		-0.497062	0.981966		-0.381599	0.993909		-1.27414	0.941984		0.305497	0.981132
-0.374164	0.983352		-0.702297	0.948582		-0.567832	0.989087		-0.184953	0.969504		-0.00766175	0.990343		0.586162	0.927749		-0.0778713	0.980309		-0.0745736	0.967013		0.149198	0.985283		-0.211395	0.963603		0.694329	0.919086		-1.31521	0.91496		-0.163875	0.984298		-0.0058949	0.976328		-0.146869	0.989933		-1.4138	0.926072		0.336273	0.982383
-0.343466	0.972877		-0.711173	0.947897		-0.982729	0.952293		-0.0134957	0.974678		1.07192	0.940042		0.824963	0.912113		0.444167	0.9221		-0.642397	0.959581		0.245869	0.981748		-0.79745	0.971164		0.0741733	0.988602		0.335737	0.954942		0.831622	0.970312			0.953201		-0.386738	0.988819		-0.144504	0.982797		0.205396	0.978219
-0.096199	0.973485		-1.1106	0.874831		-2.11253	0.777361		-0.239608	0.971411		0.999052	0.939991		0.389171	0.959561		-0.00856359	0.983174		-0.610409	0.966475		-0.303587	0.988891		-0.904365	0.963086		0.59943	0.952244		1.7654	0.903588		0.330268	0.971843		-0.399598	0.971823		-0.185552	0.990621		-0.621087	0.968143		0.0132671	0.980419
-0.0525182	0.965272		-0.522847	0.914403		-2.17267	0.770934		-0.376136	0.965288		1.0253	0.923796		0.193034	0.956436		-0.61757	0.94624		-0.271155	0.966173		-0.337767	0.987799		-0.671968	0.960258		0.342889	0.96797		0.066943	0.97093		-0.470466	0.932459		0.12426	0.964395		0.0387024	0.988541		-1.40653	0.910335		0.42516	0.978149
-0.255184	0.95188		0.726631	0.925254		-2.18282	0.77408		-0.333769	0.96624		2.12614	0.900503		0.138583	0.959811		0.594181	0.901659		-0.709378	0.947464		-0.409147	0.983609		-0.963031	0.945412		0.406385	0.968131		-0.0385207	0.984683		-0.443533	0.944101		-0.837416	0.946457		-0.360811	0.988329		-1.45074	0.931896		0.0372409	0.979794
2.90808	0.822701		2.28759	0.854897		-2.09681	0.776651		-0.213414	0.961427		0.548029	0.966457		0.384151	0.913028		0.106136	0.983118		1.14642	0.949234		0.079697	0.984506		-0.497912	0.947695		0.596913	0.953235		-0.0392706	0.987769		-0.274286	0.947427		0.581626	0.973734		-0.337148	0.986716		-0.25331	0.979957		-0.226144	0.975183
2.7257	0.798289		1.9842	0.852743		-2.05574	0.794637		-0.290641	0.959354		1.66038	0.909234		0.885351	0.842727		-0.289982	0.951549		-0.325771	0.937565		0.0777395	0.983741		-0.199648	0.954108		-0.0859415	0.978484		-0.278473	0.975647		-0.606291	0.8904		-0.0363157	0.978905		-0.148992	0.982613		-1.30931	0.925615		-0.430081	0.979745
1.75916	0.832025		1.27207	0.882878		-2.11197	0.762378		0.216076	0.938799		0.502856	0.94366		0.373387	0.840633		0.88697	0.883529		-0.240405	0.922504		-0.215153	0.983301		-0.0626277	0.956928		0.999111	0.870381		-0.0983401	0.983731		-0.0464663	0.953004		0.377461	0.937551		-0.0867835	0.985174		-1.23091	0.914474		-0.0184548	0.971563
2.313	0.742542		1.36635	0.746712		0.541229	0.834627		1.89388	0.711849		0.290838	0.828658		2.09263	0.754696		2.73535	0.698697		0.39423	0.82956		1.0746	0.822288		1.24761	0.828824		2.9093	0.702381		-0.061908	0.87257		3.2171	0.743887		2.38736	0.738564		0.764351	0.749838		-0.23331	0.824893		0.815817	0.82211
1.99993	0.746723		2.40403	0.724799		0.775746	0.839312		2.46585	0.699095		0.396509	0.816266		1.91564	0.75226		2.46903	0.694217		2.46109	0.783954		-0.309885	0.841149		1.43689	0.85353		2.82455	0.711841		-0.452219	0.872676		1.42798	0.759342		2.46164	0.733086		0.776512	0.748603		1.35556	0.804902		1.00347	0.821715
1.13122	0.776449		2.14805	0.729288		0.177178	0.825771		2.08326	0.705155		1.66546	0.781181		1.46026	0.766939		2.19968	0.692674		0.505784	0.83438		-1.24257	0.814561		1.5252	0.852781		2.75356	0.711748		-0.864732	0.841773		1.10236	0.782011		2.23845	0.761588		1.05019	0.737918		1.0245	0.818836		1.02363	0.817784
1.14107	0.786358		1.20051	0.761668		-0.846908	0.720334		1.30663	0.77203		1.06908	0.807812		1.3326	0.768948		2.01183	0.687698		0.16279	0.837613		-0.594574	0.8354		1.70621	0.848298		2.72828	0.721547		-0.393629	0.875664		0.520345	0.772281		2.16856	0.755802		1.46688	0.735093		1.01391	0.819012		0.997907	0.803306
1.48046	0.776068		0.0358715	0.746899		-1.4102	0.65509		1.45527	0.755998		1.43974	0.811447		1.54	0.792846		2.08635	0.682579		0.806939	0.838546		1.26387	0.851566		1.82377	0.843596		2.75776	0.722861		-0.66641	0.859301		0.609274	0.763519		1.44512	0.770581		1.35494	0.724118		0.883869	0.812263		1.06779	0.820816
1.16514	0.78026		0.0121059	0.750491		-1.49912	0.65085		1.44011	0.757772		0.0356685	0.854512		0.765596	0.812317		2.09492	0.682519		1.50699	0.822311		2.62808	0.851499		1.51029	0.843158		2.24736	0.735847		-0.991304	0.838069		0.279282	0.792378		2.55622	0.770027		0.659875	0.744882		0.585251	0.824656		1.0395	0.82685
1.11266	0.790046		0.326062	0.757522		-1.61116	0.643097		2.37316	0.677055		0.522898	0.823423		1.63384	0.729406		2.03221	0.681095		1.41512	0.827002		2.34397	0.862512		1.62782	0.852393		2.73625	0.716618		-0.234042	0.879576		0.482502	0.781901		2.48517	0.760092		0.251246	0.745875		0.656425	0.827365		1.03784	0.817357
1.04491	0.785253		0.0497066	0.747645		-1.48096	0.651265		2.11655	0.683499		1.10464	0.813189		0.980196	0.799616		2.05232	0.685357		2.04022	0.810836		1.65537	0.864716		1.84929	0.851792		1.90359	0.739505		-0.638144	0.833681		1.23402	0.783829		1.3432	0.725766		0.55995	0.751753		0.62998	0.817851		0.30292	0.837502
1.88561	0.75906		0.122749	0.74841		-1.15381	0.746732		1.84888	0.68832		1.60185	0.769725		0.673281	0.799006		2.04623	0.677772		0.442988	0.817229		1.35217	0.859543		1.90156	0.846558		2.68332	0.706109		-1.56252	0.784543		1.24019	0.787113		1.61342	0.759281		1.10186	0.739554		0.257225	0.835224		0.447838	0.839314
1.77506	0.750346		-0.0201608	0.744352		0.787756	0.848624		1.78178	0.684198		0.418781	0.838479		-0.158233	0.806798		2.08253	0.678722		0.375918	0.830232		0.9212	0.866696		1.61588	0.842598		1.80286	0.731013		-0.299249	0.852622		0.224097	0.756065		0.867084	0.746763		1.02588	0.704818		0.675139	0.812702		0.926074	0.810491
1.18429	0.786917		-0.0102166	0.747526		-0.045947	0.82089		1.77852	0.690075		0.654605	0.813734		-0.484316	0.772308		2.05903	0.686743		1.11539	0.816124		0.671429	0.869923		1.65824	0.848054		2.15088	0.728161		-0.515542	0.848639		0.442803	0.764676		0.6659	0.758109		0.71184	0.701433		0.781487	0.80991		1.2283	0.803611
0.999094	0.793462		0.931125	0.744224		-1.52821	0.647802		1.78385	0.691164		2.33751	0.758019		0.641125	0.775862		1.81172	0.680436		1.76457	0.824817		1.31514	0.871802		1.43246	0.837541		2.18847	0.730011		-0.6312	0.846148		0.123923	0.753621		0.584883	0.75762		0.995637	0.710726		0.874608	0.816967		1.96839	0.802714
1.16492	0.788163		1.50016	0.748239		-1.17492	0.71384		1.76131	0.683116		0.543113	0.828504		0.6856	0.783451		1.85189	0.67371		0.187258	0.834634		1.23558	0.866241		1.47473	0.841346		2.0398	0.736901		-1.41496	0.768981		0.486165	0.759159		1.36227	0.767792		1.29443	0.71363		0.894195	0.807182		1.87022	0.775015
1.17235	0.780912		0.140723	0.734304		-1.23013	0.693822		1.68329	0.689148		0.44118	0.842061		-0.0656988	0.815843		1.86699	0.669205		0.0620679	0.837564		1.41797	0.868475		1.15928	0.8459		1.96995	0.738052		-1.34627	0.788626		0.362189	0.740762		1.87294	0.759216		1.19786	0.714009		0.857286	0.808003		1.36785	0.787022
1.26739	0.782807		-0.160352	0.734534		-1.37175	0.665955		1.70504	0.697058		1.52318	0.754219		0.570845	0.808598		1.91615	0.67323		1.42022	0.799232		1.55261	0.86992		1.1977	0.836193		2.51792	0.735979		-0.25772	0.847392		-0.0125659	0.714716		1.28582	0.770428		1.27401	0.708108		1.04096	0.804167		1.22351	0.791231
1.31721	0.773646		-0.101094	0.737684		-1.41351	0.666029		1.63113	0.693648		1.77938	0.794009		0.558883	0.817397		1.90241	0.676831		1.7668	0.811209		1.33191	0.865368		1.24492	0.833883		2.42506	0.747064		0.892716	0.820156		0.716537	0.751842		1.51633	0.766821		1.34438	0.700313		1.06085	0.778898		0.640474	0.793496
1.1397	0.794111		0.0376285	0.74732		-1.50322	0.689006		1.7237	0.689819		0.461355	0.824789		0.830836	0.80844		2.00021	0.678967		0.0596032	0.826992		1.52255	0.864011		2.58624	0.815356		1.75331	0.753188		0.526606	0.841176		0.500784	0.727108		1.81457	0.739111		0.898678	0.695297		0.897788	0.786269		-0.522986	0.796651
1.27826	0.789243		-0.0149598	0.73737		1.01945	0.857093		1.53588	0.681267		0.564469	0.823156		0.0715411	0.822085		1.83283	0.676733		0.828952	0.807896		1.19913	0.856856		2.7714	0.823152		1.43053	0.758719		-0.0917468	0.86907		0.803287	0.743856		1.92208	0.746609		0.0996789	0.684045		0.878496	0.785755		0.291904	0.806139
1.66239	0.777088		-0.0378819	0.736938		0.847496	0.851608		1.52891	0.674934		1.76287	0.747504		0.890343	0.817174		1.80852	0.667819		2.02977	0.785492		1.32523	0.856566		2.37567	0.827596		1.75213	0.751917		-0.514678	0.860291		1.7366	0.763184		1.93657	0.75945		0.838358	0.701736		0.70191	0.791124		0.186581	0.80689
1.88312	0.741282		1.01408	0.728892		-0.00744741	0.83413		1.50589	0.683597		2.10528	0.754026		0.937282	0.810011		1.75513	0.681455		1.43212	0.796005		1.40848	0.856529		1.69435	0.81015		1.63082	0.737785		-0.104719	0.879914		0.363046	0.772137		0.875702	0.72291		1.02363	0.707177		0.728946	0.79763		-0.281024	0.80487
3.09684	0.673324		2.0831	0.695793		-0.394269	0.80864		1.59951	0.677932		1.70508	0.793468		-0.368242	0.80409		1.64591	0.665108		0.1299	0.821463		1.6693	0.850889		1.1746	0.810185		1.44294	0.754719		-0.338631	0.863416		0.0498047	0.759127		1.79632	0.749841		0.712545	0.686231		0.737662	0.799161		-0.132914	0.796372
2.7929	0.694139		1.75838	0.694996		-0.662736	0.793263		1.49364	0.680729		2.0718	0.7581		1.22937	0.792278		1.74331	0.668962		0.0768389	0.83082		1.58825	0.851613		0.841628	0.827899		1.29099	0.762026		-0.757941	0.838599		0.149428	0.764693		1.34994	0.740995		0.261266	0.660251		0.77188	0.79973		0.353669	0.81189
1.41302	0.757284		0.668087	0.738332		-1.37096	0.667914		1.57832	0.685135		1.01694	0.817247		-0.144478	0.796312		2.22271	0.688632		0.535973	0.813048		1.37403	0.858709		0.912428	0.825083		1.36217	0.747818		-1.57812	0.772602		0.854153	0.770143		1.08451	0.751158		-0.356074	0.649933		0.775645	0.797417		0.189191	0.825421
0.968956	0.785234		0.0658934	0.727242		-1.12409	0.692651		1.43376	0.678674		1.61498	0.778155		-0.714027	0.805745		2.54783	0.698295		1.15399	0.808127		1.70429	0.855763		0.951041	0.821591		1.1024	0.748711		-0.384184	0.82981		0.357264	0.766713		0.865012	0.7158		-2.07377	0.533783		0.701167	0.793496		-0.158104	0.832833
0.919705	0.786591		-0.0679604	0.733473		0.724454	0.848203		1.41754	0.681557		3.57385	0.68892		-2.07661	0.78288		2.35316	0.692505		0.277089	0.824798		1.72165	0.861926		1.07456	0.824347		1.27459	0.733088		-0.841538	0.818367		-0.00816877	0.736727		0.969793	0.735789		-0.344605	0.617745		0.622523	0.792403		0.306324	0.820528
0.867395	0.793115		-0.0144869	0.737829		1.00163	0.852901		1.41138	0.681618		2.11825	0.770113		-1.30058	0.780119		1.95524	0.69042		1.36844	0.786108		1.37838	0.854943		1.17183	0.820877		1.77916	0.731464		-1.03121	0.760997		-0.0704123	0.745236		0.721996	0.752611		-0.167009	0.689143		0.587317	0.795946		0.0856465	0.827941
0.978209	0.794368		0.35552	0.738789		-0.312744	0.790477		1.39636	0.680986		0.543674	0.821953		1.33027	0.727265		1.86174	0.675282		1.74213	0.805364		1.59651	0.856721		1.09097	0.819396		2.5105	0.747714		-0.4635	0.834608		-0.0288331	0.735227		0.45723	0.757999		0.0188648	0.695264		0.622837	0.795954		0.700334	0.80762
2.05235	0.744777		0.00679896	0.736457		-1.21255	0.675534		1.45496	0.678351		0.462056	0.826881		0.732636	0.725756		1.9834	0.672207		0.384744	0.822267		1.61854	0.844163		1.45227	0.81527		2.60534	0.737617		-0.81274	0.813089		0.39513	0.760008		0.556612	0.738324		-0.371638	0.69073		0.67322	0.796618		0.391942	0.827579
1.52232	0.748484		0.789131	0.729294		-1.51039	0.644799		1.48233	0.676714		0.76744	0.822988		0.255414	0.750281		2.05374	0.672456		-0.0643276	0.829877		1.5778	0.837719		-0.0419289	0.818473		2.44995	0.735045		-1.36051	0.780298		1.9583	0.748435		0.382316	0.728134		-0.23901	0.676244		0.852873	0.809212		0.356275	0.823766
0.995927	0.777273		0.681597	0.72615		-1.25227	0.66364		1.33996	0.681068		0.633511	0.823411		-0.252886	0.798503		2.03972	0.668861		0.455308	0.818646		1.74945	0.847946		0.0702791	0.820844		2.47012	0.742118		-0.254187	0.841395		1.68964	0.763255		0.399912	0.73946		-0.500922	0.702521		0.822829	0.824538		0.278868	0.831498
0.921841	0.930622		-0.56889	0.841558		1.39448	0.918061		1.33585	0.842928		0.747429	0.944664		0.455617	0.842628		0.245474	0.966021		0.366172	0.886192		1.87625	0.901839		0.533959	0.926597		-0.0822325	0.959647		0.570478	0.954254		0.175712	0.949942			0.950288		-0.15049	0.952881		1.76186	0.83083		0.386974	0.943174
0.555792	0.951281		-0.549721	0.86562		0.811168	0.942936		1.54977	0.873203		1.82372	0.901865		0.972649	0.905561		0.0977019	0.966345		-0.0329821	0.83075		1.75943	0.937886		-0.0237633	0.945134		-0.21411	0.957584		2.21001	0.884545		0.174404	0.963685			0.951833		-0.175157	0.967026		2.76642	0.848541		0.992358	0.941108
0.236105	0.957492		-0.903471	0.82291		-0.134002	0.966533		1.29517	0.900739		0.805119	0.958707		0.78875	0.917955		-0.0750527	0.974505		-0.500904	0.799728		1.41395	0.947412		0.201164	0.950787		-0.0583765	0.966262		0.713665	0.928086		0.377602	0.953572			0.87421		-0.273341	0.96707		2.68815	0.863147		0.852688	0.957628
0.139901	0.964889		-0.896276	0.820304		0.639236	0.950504		1.36649	0.884733		0.643464	0.963256		-0.216459	0.944795		-0.0679392	0.976191		-0.506906	0.794126		0.939894	0.951393		-0.167865	0.951664		-0.208283	0.963108		2.11129	0.881487		0.267396	0.951646			0.876247		-0.144646	0.971595		2.39906	0.869302		0.00952942	0.930944
0.291975	0.966998		-1.2083	0.782366		0.446051	0.956313		0.844431	0.937713		0.514945	0.974575		0.740118	0.924116		0.0204347	0.978531		-0.606156	0.823307		0.666142	0.952662		-0.464656	0.952137		-0.37975	0.969404		1.1685	0.902181		0.346953	0.946792			0.974234		-0.045085	0.976222		1.0514	0.935874		-1.27276	0.902466
0.248721	0.971809		-1.10748	0.817767		0.741305	0.950415		-0.014785	0.949857		1.54287	0.908917		0.100074	0.939701		-0.507643	0.933359		-0.760032	0.86679		0.793115	0.959492		-0.373989	0.961041		-0.152082	0.968208		0.300575	0.944388		0.619154	0.950976			0.977248		-0.283964	0.977939		0.257407	0.948052		0.755398	0.958277
0.448932	0.973794		-0.623568	0.865357		-0.041421	0.969727		-0.315051	0.94557		0.845124	0.960683		0.751206	0.912403		0.00226108	0.960186		-0.307645	0.927064		0.567265	0.952803		-0.158108	0.957153		-0.5533	0.941271		0.360808	0.968784		1.3023	0.930945			0.965621		-0.314922	0.980264		0.081065	0.964634		0.689403	0.963355
0.21688	0.978553		-0.565599	0.866833		0.723862	0.942099		-0.362084	0.951751		0.110495	0.975742		0.621389	0.930241		0.681383	0.93886		1.27265	0.954196		0.461586	0.960823		-0.262302	0.961971		-0.833267	0.922151		0.214544	0.968447		1.8683	0.934051			0.977888		-0.24014	0.979452		0.502501	0.942841		0.741246	0.956546
0.0495202	0.983132		-1.01426	0.825938		-0.487163	0.956683		-0.405123	0.953734		0.119752	0.976432		0.24584	0.952311		0.558711	0.952191		-0.373619	0.952459		-0.037911	0.960548		-0.236411	0.962844		-0.174307	0.973611		-0.0284896	0.984795		1.67322	0.919111			0.936638		0.125134	0.978631		0.25948	0.964598		-0.0208336	0.950184
0.219274	0.974765		-1.28796	0.767591		1.18037	0.925241		-0.447506	0.950166		2.14258	0.893588		0.433344	0.931317		0.120851	0.97662		-0.506405	0.95643		0.532733	0.969275		-0.119643	0.969446		-0.282511	0.966571		0.650183	0.957135		0.153038	0.966676			0.923478		-0.41995	0.982769		0.00643178	0.97582		-0.669873	0.930634
-0.000226474	0.981083		-0.928866	0.909848		0.129314	0.979928		-0.16828	0.968969		0.689716	0.968627		0.215022	0.912655		0.235627	0.978982		-0.596517	0.946693		0.344841	0.975168		-0.242259	0.95966		-0.653908	0.924039		0.0780645	0.983211		0.139172	0.967321			0.981924		-0.266626	0.984829		0.204942	0.97189		-1.57843	0.896948
0.00707916	0.982134		-0.244224	0.963073		-0.705303	0.926592		-0.432329	0.96039		1.57725	0.925465		0.0188098	0.858998		-0.176292	0.980003		-0.830413	0.926327		-0.0149647	0.974331		-0.438588	0.953388		-0.678625	0.945452		-0.17181	0.982411		0.197495	0.955317			0.986187		-0.50928	0.987347		-0.0262362	0.978031		-1.78202	0.895914
0.347099	0.97583		-0.765093	0.938839		0.418422	0.944693		-0.361961	0.969272		1.16815	0.953894		0.483571	0.833499		-0.267303	0.964166		-0.849158	0.927584		0.112977	0.977204		-0.70776	0.956839		0.126976	0.966643		0.0839697	0.982801		-0.142404	0.945381			0.976737		-0.324461	0.988115		0.0522513	0.966857		-1.09985	0.903101
0.141357	0.981222		-0.456592	0.959886		0.908742	0.940524		0.152693	0.969962		1.84673	0.928087		0.266252	0.845502		0.0403918	0.984916		-0.653094	0.940912		-0.408268	0.958226		-0.785658	0.962462		-0.239628	0.953222		-0.824815	0.972368		0.350694	0.971486			0.982956		-0.129945	0.988058		2.6436	0.859254		-1.79853	0.892068
0.162304	0.98725		-1.04718	0.886687		0.702088	0.955859		-0.228603	0.977612		0.824727	0.970161		0.154757	0.891473		-0.498922	0.918448		-0.462356	0.948173		0.781645	0.977282		-0.503749	0.965488		-0.402172	0.951015		0.0560693	0.985194		0.257705	0.974345			0.982178		-0.194915	0.988731		2.23338	0.862058		-0.589869	0.929735
0.0170636	0.986175		-0.816364	0.906436		0.431949	0.974037		-0.263438	0.971572		0.104963	0.986009		0.110818	0.927236		-0.209206	0.974695		-0.621377	0.943216		0.237823	0.988967		-0.944498	0.968906		-0.569596	0.928647		-0.38222	0.987141		0.49634	0.972715			0.955606		-0.166948	0.990298		2.04941	0.877534		-0.82232	0.935971
0.27059	0.982473		-1.52942	0.852096		-0.215197	0.975067		-0.364187	0.970956		0.487251	0.958941		0.485232	0.932382		-0.245204	0.977206		-0.550476	0.946797		0.321438	0.985484		-0.889392	0.982668		-0.0862873	0.965945		-0.187782	0.977764		0.518576	0.969771			0.851834		0.0236107	0.991045		0.552941	0.967423		-1.07345	0.951273
0.203141	0.985592		0.0439208	0.969879		-0.978755	0.919532		-0.336586	0.981352		0.569761	0.974385		0.352865	0.951685		0.548012	0.949013		0.304686	0.96022		0.35724	0.988874		-0.658164	0.984167		-0.272314	0.95623		1.75532	0.903065		0.612699	0.968951			0.9734		-0.189395	0.991469		0.63875	0.953623		-0.0743561	0.978538
0.135006	0.991511		-0.676002	0.944084		-0.191771	0.958673		0.73504	0.961823		0.527326	0.983237		-0.206644	0.961094		0.201351	0.980016		-0.419988	0.953726		0.104569	0.987123		-0.635248	0.986006		-0.209664	0.973865		0.36143	0.975431		1.98468	0.923127			0.983185		-0.0223545	0.993751		0.297382	0.977993		0.0279436	0.986054
0.162969	0.985075		-0.248879	0.977519		1.13788	0.93269		-0.0736379	0.978603		0.0183103	0.992373		-0.0528849	0.971068		-0.206087	0.985556		-0.187506	0.975173		0.130662	0.990161		-0.50175	0.986903		-0.737457	0.912817		0.325762	0.979458		0.415028	0.976112			0.973145		0.229829	0.996014		1.20504	0.926716		-0.17975	0.986839
0			0			0			0			0			0			0			0			0			0			0			0			0						0			0			0
0.00862352	0.987511		-0.520317	0.970939		0.0165124	0.980782		-0.334626	0.976255		0.297827	0.991538		-0.431659	0.982797		-0.329849	0.968333		0.60657	0.975027		0.667378	0.978259		-0.294518	0.980064		-0.18589	0.983705		-0.322559	0.98992		-0.0839968	0.990647			0.982716		-0.15177	0.994561		-0.0690962	0.986064		0.125747	0.992206
-0.211195	0.986772		-0.951176	0.917821		0.570044	0.943316		-0.258591	0.979769		0.0106485	0.992388		0.533277	0.951672		-0.283958	0.957068		-0.262079	0.970836		0.279859	0.985769		-0.713144	0.96447		-0.0431275	0.991669		-0.989453	0.957803		0.251153	0.976263			0.987644		0.0829602	0.992128		-0.208764	0.987381		0.156523	0.988886
-0.180498	0.983062		-0.960052	0.917614		0.155147	0.982547		-0.0871336	0.985024		1.09023	0.945569		0.772078	0.937846		0.238081	0.961048		-0.829902	0.949053		0.376531	0.980482		-1.2992	0.968698		-0.663283	0.912382		0.661499	0.953638		1.24665	0.939658			0.98397		-0.156909	0.991235		1.06054	0.91625		0.025646	0.985582
0.0667697	0.973872		-1.35948	0.816896		-0.974653	0.916113		-0.313246	0.979851		1.01736	0.944821		0.336286	0.979005		-0.21465	0.972151		-0.797915	0.946611		-0.172926	0.98898		-1.40612	0.95676		-0.138027	0.983799		2.09116	0.871024		0.745297	0.969795			0.97341		0.0442775	0.991893		0.583953	0.963891		-0.166483	0.976532
0.11045	0.969088		-0.771726	0.868592		-1.03479	0.907361		-0.449774	0.973149		1.04361	0.928724		0.140149	0.978124		-0.823657	0.915168		-0.45866	0.953302		-0.207105	0.986643		-1.17372	0.955459		-0.394568	0.971444		0.392705	0.951428		-0.0554382	0.973767			0.922082		0.268532	0.989079		-0.201489	0.98658		0.24541	0.986858
-0.0922156	0.965267		0.477751	0.89837		-1.04495	0.902704		-0.407407	0.971434		2.14445	0.906331		0.0856979	0.975192		0.388094	0.94472		-0.896884	0.934397		-0.278486	0.986556		-1.46478	0.944777		-0.331072	0.97192		0.287241	0.969142		-0.028505	0.976515			0.982201		-0.130982	0.989549		-0.245703	0.983372		-0.142509	0.986032
3.07105	0.846898		2.03872	0.824587		-0.958935	0.904626		-0.287052	0.969071		0.566339	0.968585		0.331267	0.936242		-0.0999509	0.97942		0.958911	0.963402		0.210359	0.984266		-0.999662	0.948137		-0.140544	0.978223		0.286491	0.980455		0.140742	0.973951			0.973198		-0.107319	0.988234		0.95173	0.911926		-0.405894	0.983212
2.88867	0.813566		1.73532	0.818247		-0.917866	0.909765		-0.364278	0.959257		1.67869	0.912493		0.832466	0.864134		-0.496069	0.921735		-0.513276	0.949719		0.208401	0.986515		-0.701398	0.953589		-0.823398	0.909071		0.0472891	0.986351		-0.191263	0.948255			0.964346		0.0808371	0.984824		-0.104272	0.983357		-0.609831	0.978701
1.92213	0.833976		1.02319	0.862191		-0.974096	0.892618		0.142438	0.955762		0.521166	0.945967		0.320502	0.856237		0.680883	0.926311		-0.427911	0.942087		-0.0844918	0.985004		-0.564377	0.953446		0.261654	0.974497		0.227421	0.984042		0.368562	0.958432			0.973808		0.143046	0.986623		-0.0258689	0.981187		-0.198205	0.981244
2.47597	0.756548		1.11747	0.710801		1.67911	0.780462		1.82024	0.738777		0.309149	0.831677		2.03975	0.740469		2.52926	0.697103		0.206724	0.823101		1.20526	0.816432		0.745858	0.856595		2.17185	0.749078		0.263854	0.856634		3.63213	0.716474			0.709632		0.99418	0.752653		0.971729	0.786631		0.636067	0.824796
2.1629	0.749825		2.15515	0.687445		1.91362	0.789624		2.39221	0.726551		0.414819	0.821136		1.86276	0.734224		2.26294	0.690657		2.27358	0.808553		-0.179223	0.839444		0.935144	0.87188		2.0871	0.750644		-0.126458	0.879065		1.84301	0.726555			0.710222		1.00634	0.750208		2.5606	0.727003		0.823723	0.83582
1.29419	0.769475		1.89917	0.695146		1.31505	0.810217		2.00962	0.731993		1.68377	0.78636		1.40737	0.745406		1.9936	0.689565		0.318279	0.82927		-1.11191	0.805299		1.02345	0.874865		2.01611	0.756146		-0.538971	0.868573		1.51739	0.754242			0.736347		1.28001	0.739264		2.22954	0.742717		0.843879	0.83114
1.30404	0.780613		0.951628	0.741858		0.290967	0.781686		1.233	0.786682		1.08739	0.81083		1.27971	0.743754		1.80574	0.683683		-0.0247154	0.828198		-0.463912	0.829426		1.20446	0.867323		1.99082	0.770378		-0.0678676	0.881748		0.935374	0.760528			0.719343		1.69671	0.737383		2.21895	0.743414		0.818157	0.823419
1.64343	0.776688		-0.213008	0.732902		-0.272322	0.742341		1.38163	0.776685		1.45806	0.813939		1.48712	0.762077		1.88026	0.680439		0.619433	0.840284		1.39453	0.842939		1.32202	0.865564		2.0203	0.776966		-0.340648	0.88123		1.0243	0.760218			0.730311		1.58477	0.725333		2.08891	0.737965		0.888045	0.834635
1.32811	0.775577		-0.236773	0.73358		-0.361242	0.735072		1.36647	0.774863		0.0539788	0.855269		0.712711	0.781122		1.88883	0.680374		1.31948	0.831556		2.75874	0.843054		1.00854	0.867183		1.5099	0.804523		-0.665542	0.870749		0.69431	0.795888			0.741337		0.889704	0.747692		1.79029	0.745982		0.85975	0.840703
1.27563	0.785344		0.0771825	0.736523		-0.473285	0.730147		2.29952	0.705174		0.541208	0.826655		1.58096	0.709033		1.82613	0.678585		1.22761	0.838314		2.47463	0.855587		1.12607	0.873162		1.99879	0.777454		0.09172	0.876459		0.89753	0.776694			0.730399		0.481075	0.748429		1.86146	0.744444		0.858095	0.833486
1.20788	0.777193		-0.199173	0.72462		-0.343085	0.73451		2.04291	0.706992		1.12295	0.815874		0.927311	0.77298		1.84624	0.682282		1.85272	0.823913		1.78604	0.860109		1.34754	0.870142		1.16613	0.803657		-0.312382	0.862103		1.64905	0.761341			0.680988		0.789779	0.75318		1.83502	0.742032		0.12317	0.825525
2.04857	0.76914		-0.12613	0.718897		-0.015935	0.787676		1.77524	0.713043		1.62016	0.774113		0.620396	0.777506		1.84014	0.674445		0.255483	0.801863		1.48283	0.854045		1.39981	0.86511		1.94587	0.757025		-1.23676	0.837738		1.65522	0.755767			0.719746		1.33169	0.741555		1.46227	0.778407		0.268088	0.832904
1.93803	0.753002		-0.26904	0.715648		1.92563	0.786773		1.70814	0.707333		0.437091	0.837522		-0.211118	0.778354		1.87645	0.676944		0.188412	0.82118		1.05186	0.863143		1.11413	0.863464		1.0654	0.800781		0.0265122	0.871117		0.639126	0.765375			0.701593		1.25571	0.706447		1.88018	0.737642		0.746324	0.816825
1.34726	0.783929		-0.259096	0.716466		1.09193	0.815152		1.70488	0.713176		0.672916	0.816808		-0.537201	0.747035		1.85294	0.687482		0.92788	0.830536		0.802091	0.865364		1.15649	0.867334		1.41342	0.798369		-0.18978	0.863679		0.857832	0.760292			0.710902		0.941669	0.704472		1.98653	0.738927		1.04855	0.814375
1.16206	0.793252		0.682246	0.706498		-0.390338	0.739118		1.71021	0.709902		2.35582	0.762415		0.58824	0.755229		1.60563	0.679604		1.57706	0.835485		1.4458	0.866533		0.930711	0.858484		1.45101	0.792755		-0.305438	0.86232		0.538952	0.755901			0.71131		1.22547	0.713203		2.07965	0.737148		1.78864	0.800491
1.32789	0.784074		1.25128	0.720809		-0.0370427	0.781224		1.68767	0.70669		0.561423	0.829086		0.632715	0.764006		1.6458	0.67257		-0.000247995	0.825467		1.36624	0.861958		0.972977	0.860665		1.30234	0.80954		-1.0892	0.823953		0.901193	0.754486			0.733029		1.52426	0.715706		2.09923	0.732134		1.69047	0.786396
1.33532	0.777805		-0.108156	0.713741		-0.0922532	0.769417		1.60965	0.70985		0.45949	0.842794		-0.118584	0.787218		1.66091	0.668329		-0.125438	0.833605		1.54863	0.864774		0.657531	0.862402		1.23249	0.802302		-1.02051	0.836601		0.777218	0.739997			0.728662		1.42769	0.715549		2.06233	0.734837		1.1881	0.797936
1.43036	0.783561		-0.409231	0.70785		-0.233875	0.747517		1.63141	0.714767		1.54149	0.758281		0.51796	0.784944		1.71007	0.673823		1.23272	0.818507		1.68328	0.862601		0.695951	0.852936		1.78046	0.784756		0.0680411	0.848449		0.402462	0.733505			0.730693		1.50384	0.710759		2.246	0.736422		1.04376	0.794804
1.48018	0.768792		-0.349973	0.706073		-0.275635	0.745059		1.5575	0.711982		1.79769	0.798033		0.505998	0.793555		1.69632	0.677282		1.5793	0.821709		1.46257	0.858606		0.743167	0.854028		1.68761	0.797409		1.21848	0.812372		1.13157	0.725895			0.730997		1.57421	0.703731		2.26589	0.728276		0.460724	0.800057
1.30267	0.788438		-0.211251	0.712958		-0.365344	0.74952		1.65006	0.709586		0.479665	0.827281		0.777951	0.782283		1.79413	0.680063		-0.127902	0.813758		1.65321	0.855302		2.08449	0.835978		1.01585	0.805779		0.852368	0.814966		0.915812	0.739363			0.703928		1.12851	0.698029		2.10283	0.732943		-0.702736	0.774796
1.44123	0.785456		-0.263839	0.701246		2.15733	0.786091		1.46224	0.702394		0.58278	0.827311		0.0186562	0.783727		1.62675	0.67661		0.641446	0.816915		1.32979	0.850786		2.26965	0.845036		0.693071	0.816008		0.234015	0.853315		1.21832	0.726718			0.710108		0.329508	0.685571		2.08354	0.734589		0.112154	0.803767
1.82535	0.78608		-0.286761	0.705517		1.98537	0.794078		1.45527	0.703474		1.78118	0.75323		0.837458	0.779208		1.60244	0.667566		1.84226	0.805384		1.45589	0.85113		1.87392	0.848496		1.01467	0.81831		-0.188916	0.868869		2.15163	0.715826			0.721156		1.06819	0.704508		1.90695	0.730653		0.00683132	0.796976
2.04609	0.750423		0.765198	0.688544		1.13043	0.819357		1.43226	0.701484		2.1236	0.755581		0.884397	0.767852		1.54904	0.683558		1.24462	0.809239		1.53915	0.848918		1.1926	0.831279		0.893358	0.808929		0.221042	0.865471		0.778075	0.74249			0.676113		1.25346	0.710183		1.93399	0.736938		-0.460773	0.792943
3.25981	0.704537		1.83422	0.661515		0.743607	0.822835		1.52588	0.697779		1.72339	0.792712		-0.421127	0.758387		1.43982	0.666236		-0.0576061	0.814441		1.79997	0.84341		0.672855	0.832988		0.705479	0.811627		-0.0128692	0.871518		0.464833	0.751547			0.714774		0.942374	0.687734		1.9427	0.737661		-0.312664	0.792068
2.95587	0.713793		1.5095	0.667104		0.475139	0.814786		1.42001	0.703529		2.09011	0.760381		1.17649	0.753488		1.53722	0.670071		-0.110667	0.823834		1.71891	0.844561		0.339878	0.847197		0.553535	0.819058		-0.432179	0.858308		0.564456	0.755794			0.702816		0.491095	0.662972		1.97692	0.736494		0.173919	0.802523
1.57599	0.749882		0.419208	0.722161		-0.233088	0.751175		1.50468	0.710967		1.03525	0.817309		-0.197363	0.748878		2.01663	0.690625		0.348467	0.820553		1.50469	0.856313		0.410678	0.842569		0.624718	0.812078		-1.25236	0.825313		1.26918	0.7317			0.704681		-0.126245	0.653137		1.98069	0.736537		0.00944078	0.818838
1.13192	0.779847		-0.182986	0.704438		0.0137887	0.758749		1.36012	0.702769		1.63329	0.780945		-0.766911	0.760235		2.34174	0.696763		0.966489	0.820887		1.83495	0.85327		0.449291	0.845939		0.364944	0.806649		-0.0584223	0.850065		0.772292	0.749318			0.665104		-1.84394	0.536127		1.90621	0.734075		-0.337853	0.821764
[truncated: 2,346 more rows]

## Sheet: brain_observatory_1.1
Session ID:	743475441		Session ID:	750332458		Session ID:	750749662		Session ID:	751348571		Session ID:	754829445		Session ID:	755434585		Session ID:	756029989		Session ID:	757216464		Session ID:	757970808		Session ID:	758798717		Session ID:	759883607		Session ID:	760345702		Session ID:	760693773		Session ID:	762120172		Session ID:	762602078		Session ID:	763673393		Session ID:	791319847
[truncated: 401 more rows]
