# Supplementary material for: Contribution of behavioural variability to representational drift
Source: eLife journal article supplement (doi:10.7554/elife.77907), 2022-08-30

**a**

Neuropixels dataset1

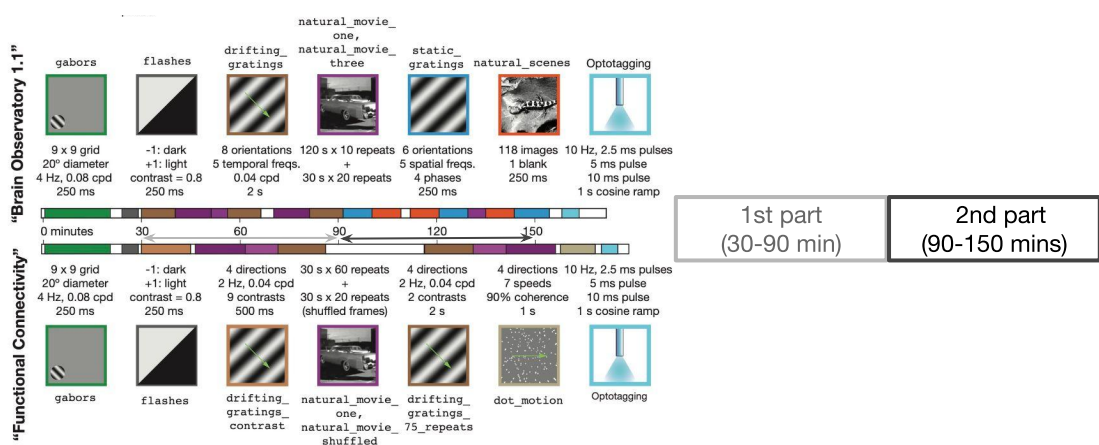**c**

Neuropixels dataset1

All units

V1 units

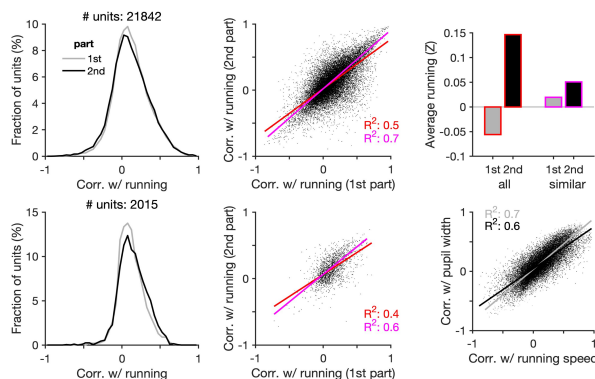**d**

Neuropixels dataset2

All units

V1 units

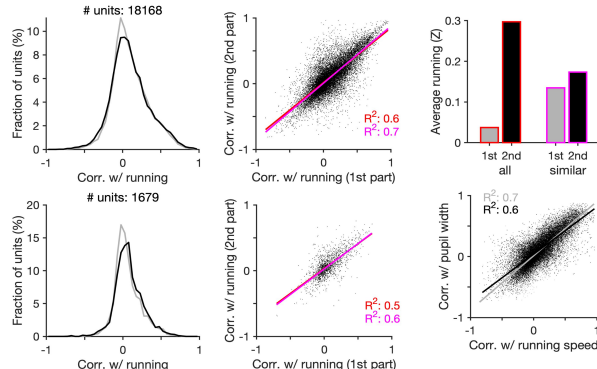**e**

Other regions

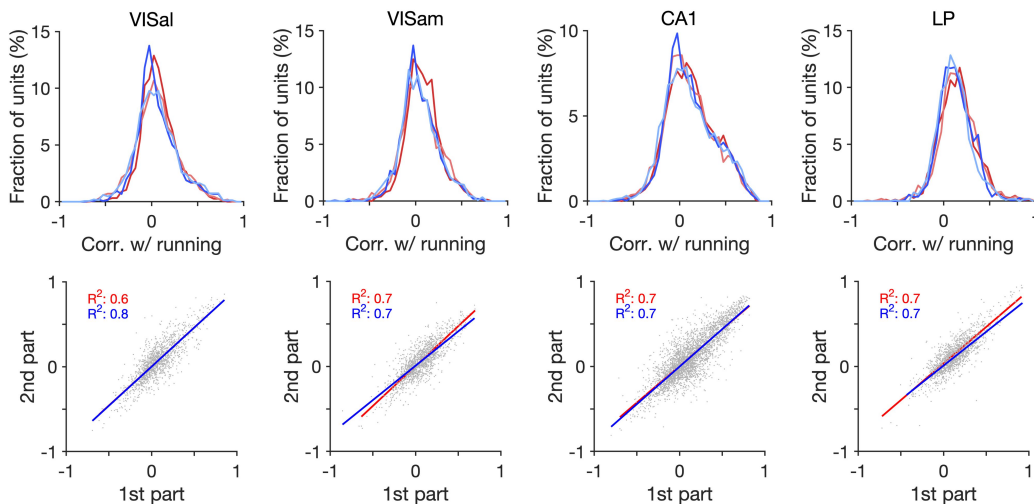**f**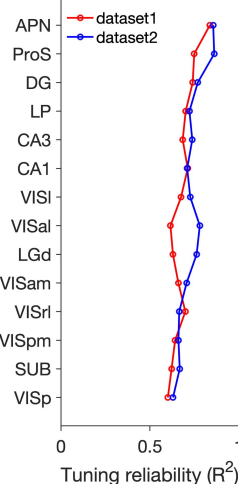

Supplement: supp [file elife-77907-supp-v1.zip › elife_poa_e77907_Figure_5_figure_supplement_3.pdf]
