# Supplementary material for: Contribution of behavioural variability to representational drift
Source: eLife journal article supplement (doi:10.7554/elife.77907), 2022-08-30
Supplement: supp [file elife-77907-supp-v1.zip › elife_poa_e77907_Figure_6_source_data_1.xls]

## Sheet: brain_observatory_1.1
brain_observatory_1.1
	Natural movie				Drifting grating
Session ID	Avg. pupil width (Block 1)	Avg. pupil width (Block 2)	Avg. running (Block 1)	Avg. running (Block 2)	Avg. pupil width (Block 1)	Avg. pupil width (Block 2)	Avg. running (Block 1)	Avg. running (Block 2)
715093703			0.0999975	-0.116227			0.34222	-0.0290853
719161530			0.16026	-0.0433933			1.03225	-0.0866123
721123822			0.107602	0.656688			0.263841	0.328329
732592105			0.0417468	-0.0287697			0.157361	-0.148614
737581020			0.00578423	0.586553			0.743765	-0.214267
739448407			-0.137041	-0.0518627			-0.194947	-0.198764
742951821	-0.100956	-0.268657	0.0336952	-0.0985629	0.254913	0.0738145	0.380732	0.0380262
743475441	-0.244014	0.319364	-0.177474	0.065903	-0.283594	0.0967643	-0.249899	0.167217
744228101	0.0805291	0.549096	-0.220279	-0.319294	0.0431952	0.352874	-0.167679	-0.127913
746083955	0.0867305	0.92977	-0.269528	1.22091	-0.797334	-0.0561583	-0.400042	-0.390126
750332458	0.822355	-0.344137	0.617353	-0.648726	0.687955	0.906771	0.88769	-0.0643211
750749662	0.121939	0.505984	0.80088	0.926892	0.0956242	-0.456352	0.985605	-0.490904
751348571	0.237862	-0.53276	0.404705	-0.853512	0.492175	0.638002	0.112522	0.672664
754312389	-0.231001	0.285342	0.0753705	-0.0508707	-0.158336	-0.269507	-0.116002	-0.271027
754829445	0.302135	0.899413	0.408176	0.0373205	-0.419185	0.213054	-0.284464	-0.164104
755434585	-0.327058	0.70435	-0.437433	0.774321	0.0895324	-0.0866456	-0.0597381	-0.438316
756029989	0.0933833	0.625996	0.165339	0.669834	-0.634211	0.125202	-0.56291	-0.171732
757216464	-0.0499958	0.274335	-0.0235084	-0.384363	-0.163738	-0.355475	-0.24933	-0.494846
757970808	0.379562	0.44673	0.228927	0.291918	-0.0608898	0.12623	-0.236056	-0.330656
758798717	0.00698989	0.0281984	0.0325829	0.00873432	0.124921	-0.000120878	0.278844	0.011645
759883607	-0.66666	0.841479	-0.664095	1.92449	-0.110305	-0.368375	-0.56801	-0.641837
760345702	-0.138581	0.495547	-0.601936	1.24726	-0.667935	-0.529809	-0.767746	-0.728815
760693773	-0.00284365	0.356934	-0.243832	-0.0323751	0.150151	-0.0334477	0.439061	-0.165318
761418226	-0.537102	1.13371	-0.746434	1.11873	-0.661437	0.00448603	-0.754428	-0.692882
762120172	0.0118076	0.41683	-0.267353	0.352646	-0.136807	-0.283054	-0.290281	-0.436357
762602078	-0.456628	0.179846	-0.739838	0.999047	-0.379865	-0.50369	-0.700937	-0.816107
763673393	-0.458445	-0.094213	-0.221718	-0.389911	0.00694434	-0.175597	-0.0359635	-0.388374
773418906	-0.254416	-0.090101	-0.408085	-0.328722	-0.347483	-0.377614	-0.413662	-0.429464
791319847	-0.1046	0.885067	-0.113792	0.539544	-0.473665	-0.382436	-0.264106	-0.014781
797828357	0.298331	-0.116819	-0.239574	0.495931	-0.0464742	0.0154362	-0.220394	-0.291234
798911424	-0.29206	-0.086972	-0.375526	0.493575	-0.332676	-0.232723	-0.323432	-0.373499
799864342	-0.00908653	0.0743368	-0.10337	-0.166946	-0.528932	0.0788715	-0.185874	-0.00914044

## Sheet: functional_connectivity
functional_connectivity
	Natural movie				Drifting grating
Session ID	Avg. pupil width (Block 1)	Avg. pupil width (Block 2)	Avg. running (Block 1)	Avg. running (Block 2)	Avg. pupil width (Block 1)	Avg. pupil width (Block 2)	Avg. running (Block 1)	Avg. running (Block 2)
766640955	-0.38086	0.287421	-0.0756701	0.112328	-0.0666413	0.556687	-0.0298222	0.7145
767871931	-0.263794	0.0815707	-0.355944	-0.154183	0.215892	0.108525	-0.012538	-0.16892
768515987			0.112688	0.0421932			-0.13259	-0.213158
771160300	0.0419323	0.25597	0.510862	-0.033272	0.117048	0.180338	0.0710201	-0.00790391
771990200	-0.0253185	0.995233	-0.451322	1.34381	0.149337	0.0623388	-0.479123	-0.552105
774875821	0.101329	0.241649	-0.113727	0.344227	0.150017	0.471683	-0.0207036	1.04791
778240327	0.00262795	0.0294129	0.286188	0.0976631	0.0397114	0.056004	0.766132	0.628523
778998620	-0.346416	0.740531	-0.638875	1.72899	-0.407155	0.835112	-0.638916	1.00751
779839471	-0.0323675	0.537927	-0.24699	0.471558	0.154074	0.578214	-0.0464814	0.108297
781842082	0.412832	0.690506	1.12759	1.44078	-0.0241305	-0.338569	-0.283204	-0.500589
786091066	0.267541	0.595212	-0.0717092	0.488716	0.365271	0.473117	0.713734	0.777791
787025148	-0.471277	0.355441	-0.387489	0.642108	0.0585946	0.0713694	0.0525613	-0.118946
789848216	0.00852838	0.00645985	0.238679	0.0239923	-0.00876525	0.0149957	0.187321	0.0231471
793224716	-0.00968356	-0.253829	0.0636926	-0.443202	0.272702	0.211542	0.35958	0.189902
794812542	0.0691092	-0.333225	-0.0267037	-0.227348	0.4961	0.000178659	0.515617	-0.0874924
816200189	-0.300884	-0.128749	-0.104964	0.0049011	-0.320211	-0.0322122	-0.114288	0.332077
819186360	-0.0101926	0.250292	-0.0284294	-0.0665225	-0.0584795	0.0142358	0.0389066	0.105247
819701982	0.127304	0.0802754	0.411497	0.44596	0.156464	0.202177	0.129063	0.620559
821695405	-0.157906	-0.0760646	-0.174895	0.0751801	-0.0870296	0.0796814	-0.166515	0.156909
829720705	-0.652614	0.232861	-0.327515	0.494583	-0.186975	0.262178	-0.299445	0.365716
831882777	-0.018603	0.0951429	0.663955	0.112824	0.0397084	-0.0719802	-0.144865	0.814577
835479236	-0.0885883	0.403244	-0.38046	1.51295	-0.251483	-0.196485	-0.524089	-0.515327
839068429	-0.0367609	0.102151	0.0135146	0.200313	-0.0247853	-0.0488231	0.647068	0.568443
839557629	0.100927	0.17333	0.329636	0.393074	-0.0200058	-0.0489525	0.198298	0.00281779
840012044			0.102546	0.128793			0.126067	-0.0419931
847657808	0.0322473	0.187908	0.193472	0.107207	0.191122	0.256473	0.331639	0.0872311
