# Supplementary material for: Contribution of behavioural variability to representational drift
Source: eLife journal article supplement (doi:10.7554/elife.77907), 2022-08-30

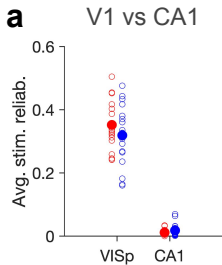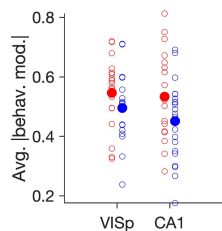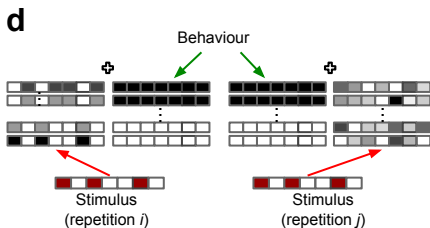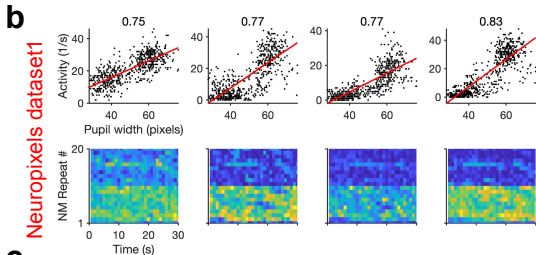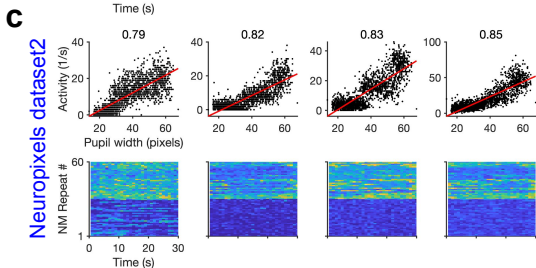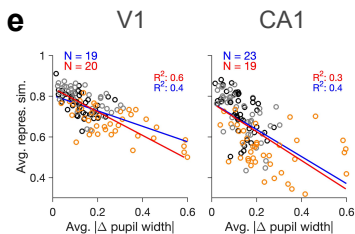

Supplement: supp [file elife_poa_e77907_Figure_2_figure_supplement_3.pdf › elife_poa_e77907_Figure_2_figure_supplement_3.pdf]
