# Supplementary material for: Contribution of behavioural variability to representational drift
Source: eLife journal article supplement (doi:10.7554/elife.77907), 2022-08-30

**a**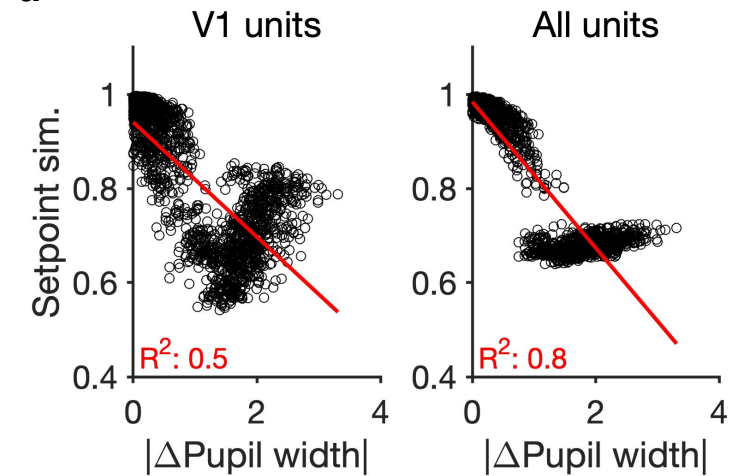**b**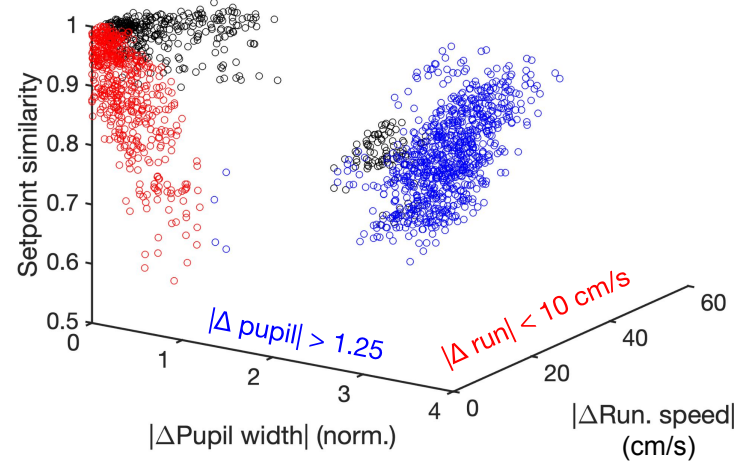**c**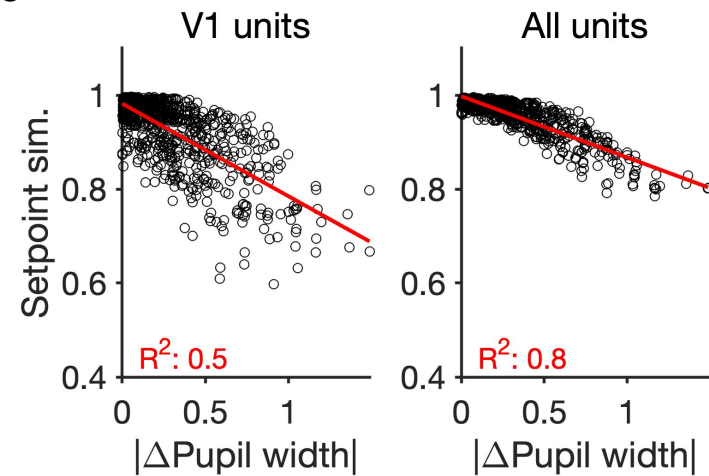**d**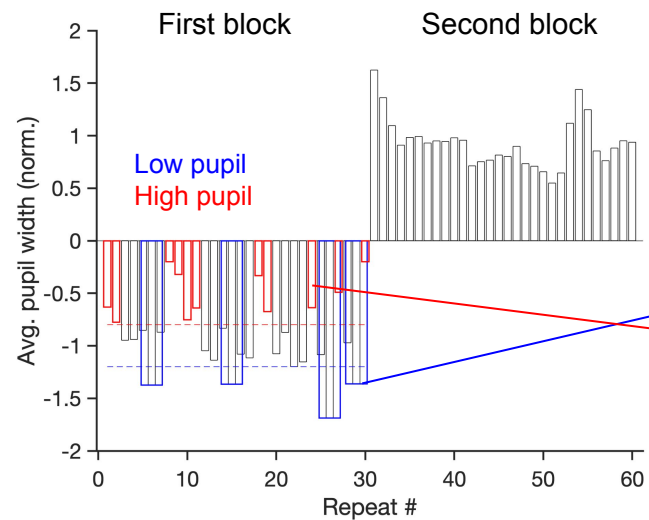**e**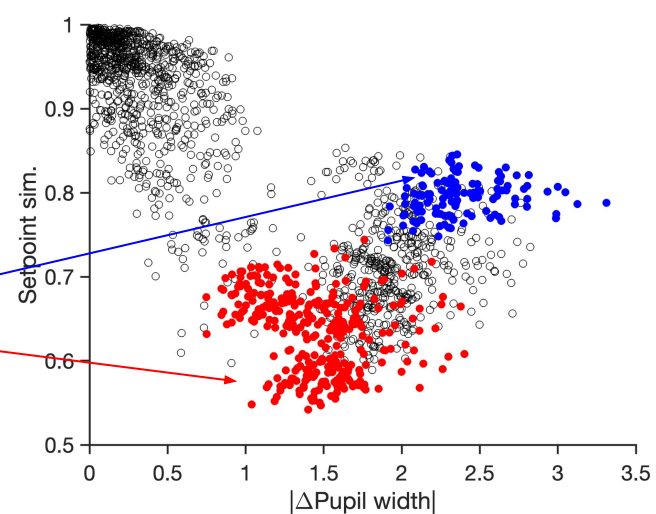**f**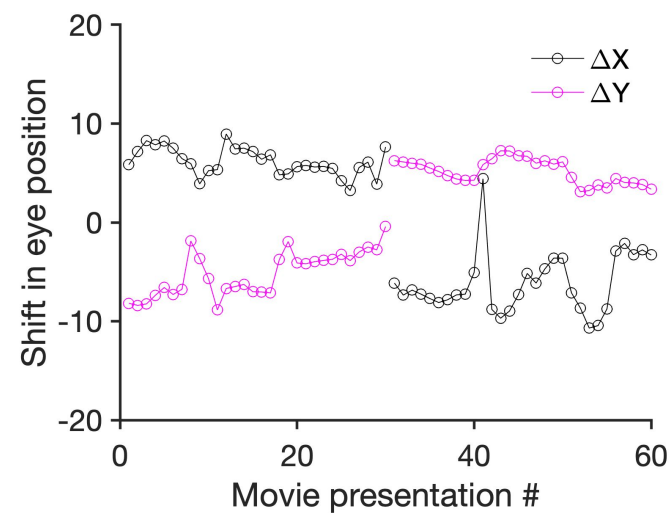

Supplement: supp [file elife_poa_e77907_Figure_4_figure_supplement_2.pdf › elife_poa_e77907_Figure_4_figure_supplement_2.pdf]
