# Supplementary material for: Contribution of behavioural variability to representational drift
Source: eLife journal article supplement (doi:10.7554/elife.77907), 2022-08-30

Neuropixels dataset1

**a**

**brain\_observatory\_1.1**

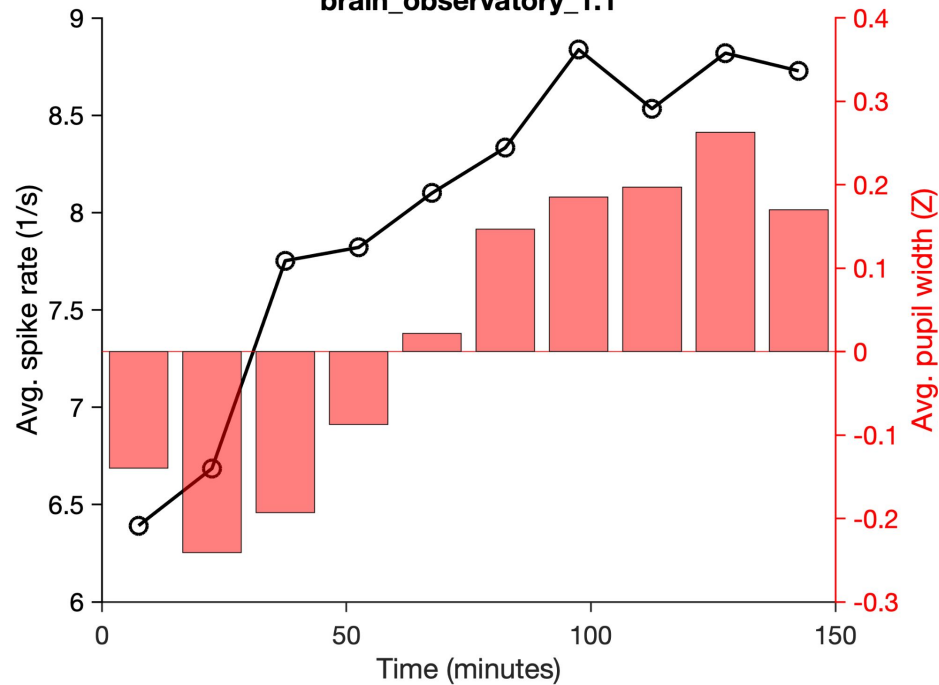

Neuropixels dataset2

**b**

**functional\_connectivity**

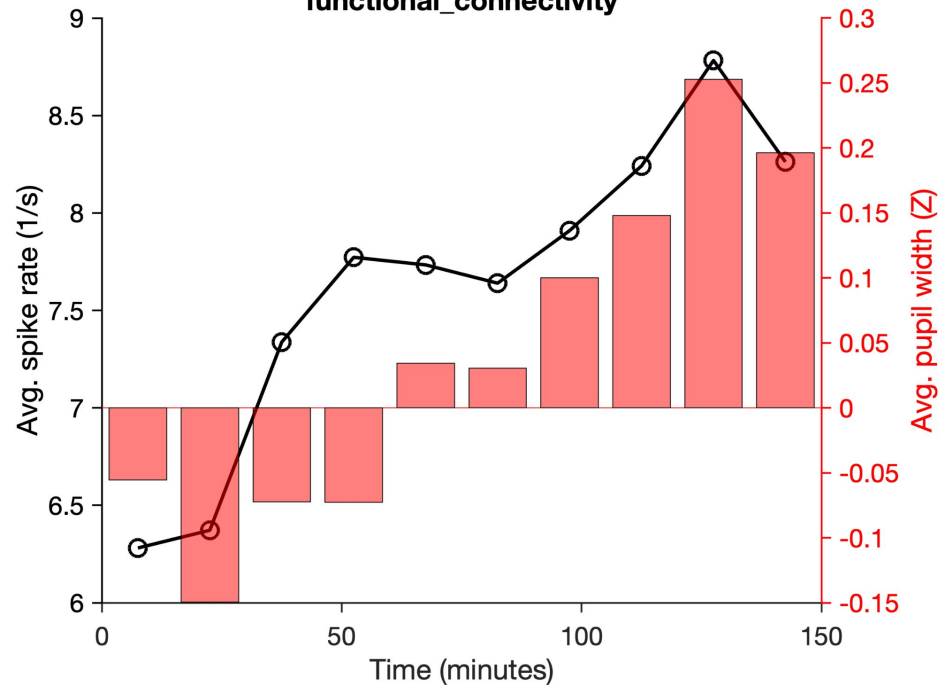

Supplement: supp [file elife_poa_e77907_Figure_4_figure_supplement_5.pdf › elife_poa_e77907_Figure_4_figure_supplement_5.pdf]
