# Supplementary material for: Contribution of behavioural variability to representational drift
Source: eLife journal article supplement (doi:10.7554/elife.77907), 2022-08-30

# Neuropixels dataset1

# Neuropixels dataset2

Example session

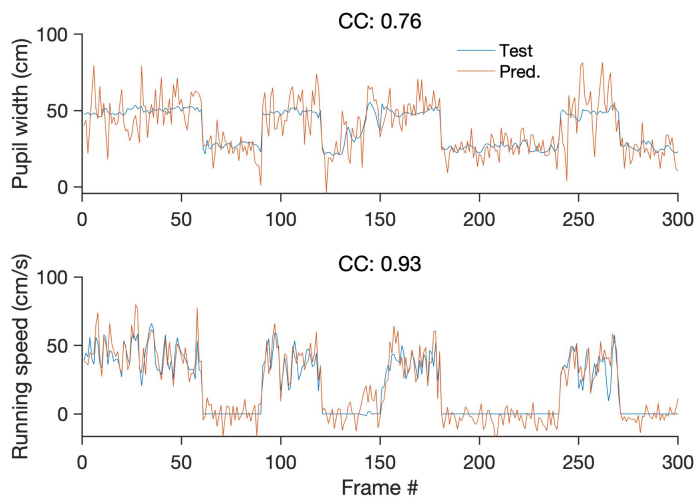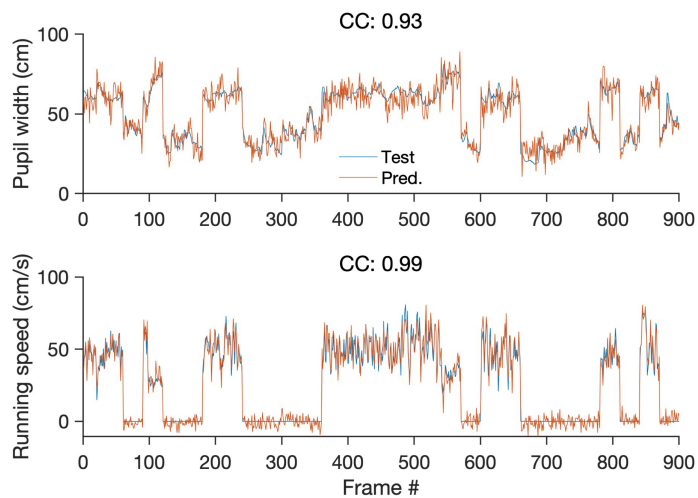

b

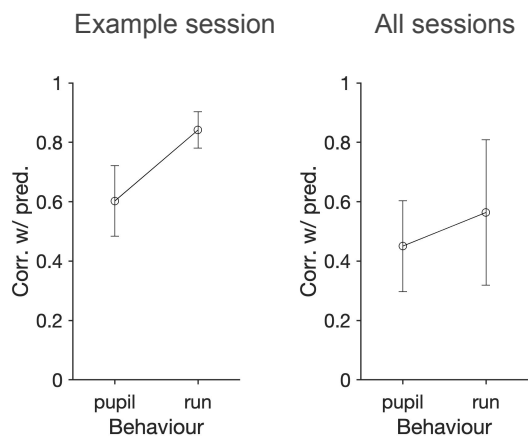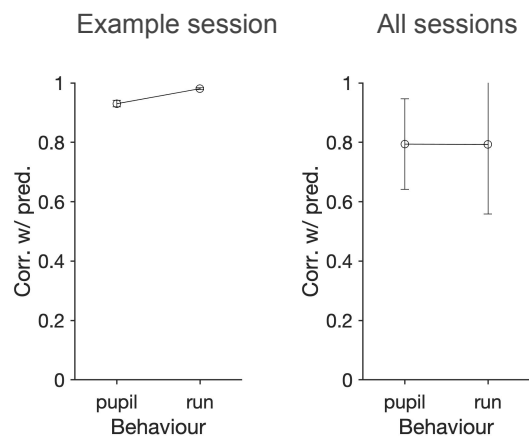

c

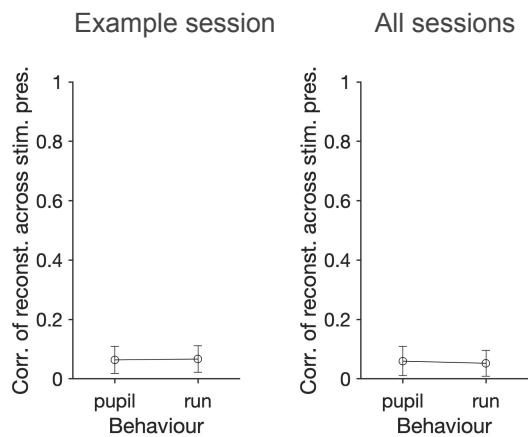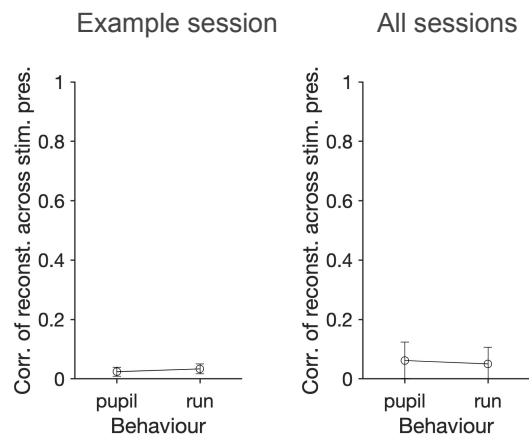

Supplement: supp [file elife_poa_e77907_Figure_7_figure_supplement_2.pdf › elife_poa_e77907_Figure_7_figure_supplement_2.pdf]
