# Supplementary material for: Contribution of behavioural variability to representational drift
Source: eLife journal article supplement (doi:10.7554/elife.77907), 2022-08-30
Supplement: supp [file session_info.xls]

## Sheet: string
id	published_at	specimen_id	session_type	age_in_days	sex	full_genotype	unit_count	channel_count	probe_count	ecephys_structure_acronyms
715093703	2019-10-03T00:00:00Z	699733581	brain_observatory_1.1	118	M	Sst-IRES-Cre/wt;Ai32(RCL-ChR2(H134R)_EYFP)/wt	884	2219	6	['CA1' 'VISrl' nan 'PO' 'LP' 'LGd' 'CA3' 'DG' 'VISl' 'PoT' 'VISp' 'grey' 'VISpm' 'APN' 'MB' 'VISam']
719161530	2019-10-03T00:00:00Z	703279284	brain_observatory_1.1	122	M	Sst-IRES-Cre/wt;Ai32(RCL-ChR2(H134R)_EYFP)/wt	755	2214	6	['TH' 'Eth' 'APN' 'POL' 'LP' 'DG' 'CA1' 'VISpm' nan 'NOT' 'MB' 'SUB' 'VISp' 'VISam' 'grey' 'VL' 'CA3' 'CA2' 'VISl' 'PO' 'VPM' 'LGd' 'VISal' 'VISrl']
721123822	2019-10-03T00:00:00Z	707296982	brain_observatory_1.1	125	M	Pvalb-IRES-Cre/wt;Ai32(RCL-ChR2(H134R)_EYFP)/wt	444	2229	6	['MB' 'SCig' 'PPT' 'NOT' 'DG' 'CA1' 'VISam' nan 'LP' 'VIS' 'ProS' 'VISp' 'LGv' 'CA3' 'VISl' 'APN' 'POL' 'LGd' 'HPF' 'VISal' 'VISrl']
732592105	2019-10-03T00:00:00Z	717038288	brain_observatory_1.1	100	M	wt/wt	824	1847	5	['grey' 'VISpm' nan 'VISp' 'VISl' 'VISal' 'VISrl']
737581020	2019-10-03T00:00:00Z	718643567	brain_observatory_1.1	108	M	wt/wt	568	2218	6	['grey' 'VISmma' nan 'VISpm' 'VISp' 'VISl' 'VISrl']
739448407	2019-10-03T00:00:00Z	716813543	brain_observatory_1.1	112	M	wt/wt	625	2221	6	['grey' 'VISam' nan 'VIS' 'VISp' 'VISl' 'VISrl']
742951821	2019-10-03T00:00:00Z	723627604	brain_observatory_1.1	120	M	wt/wt	893	2219	6	['VISal' nan 'grey' 'VISl' 'VISrl' 'VISp' 'VISpm' 'VIS']
743475441	2019-10-03T00:00:00Z	722882755	brain_observatory_1.1	121	M	wt/wt	553	2225	6	['LP' 'LGd' 'HPF' 'DG' 'CA3' 'CA1' 'VISrl' nan 'PP' 'PIL' 'TH' 'MGv' 'VISl' 'ProS' 'SUB' 'VISp' 'PO' 'Eth' 'VISmma' 'APN' 'VISam']
744228101	2019-10-03T00:00:00Z	719817805	brain_observatory_1.1	122	M	wt/wt	659	2226	6	['Eth' 'TH' 'LP' 'POL' 'APN' 'DG' 'CA1' 'VIS' nan 'CA3' 'VISrl' 'VPL' 'IGL' 'LGd' 'CA2' 'VISal' 'VISl' 'SGN' 'SUB' 'VISp']
746083955	2019-10-03T00:00:00Z	726170935	brain_observatory_1.1	98	F	Pvalb-IRES-Cre/wt;Ai32(RCL-ChR2(H134R)_EYFP)/wt	582	2216	6	['VPM' 'TH' 'LGd' 'CA3' 'CA2' 'CA1' 'VISal' nan 'grey' 'VISl' 'VISp' 'VISpm' 'VISrl']
750332458	2019-10-03T00:00:00Z	726141251	brain_observatory_1.1	91	M	wt/wt	902	2216	6	['grey' 'VISrl' nan 'VISal' 'IntG' 'IGL' 'LGd' 'CA3' 'DG' 'CA1' 'VISl' 'VISp' 'VISpm' 'VISam']
750749662	2019-10-03T00:00:00Z	726162197	brain_observatory_1.1	92	M	wt/wt	761	2223	6	['LP' 'DG' 'CA1' 'VISp' nan 'LGd' 'CA3' 'VISrl' 'VPM' 'TH' 'CA2' 'VISal' 'LGv' 'IGL' 'VISl' 'PO' 'LD' 'VISpm' 'Eth' 'VISam']
751348571	2019-10-03T00:00:00Z	732548380	brain_observatory_1.1	93	F	Vip-IRES-Cre/wt;Ai32(RCL-ChR2(H134R)_EYFP)/wt	859	2217	6	['grey' 'LGv' 'CA3' 'DG' 'CA1' 'VISl' nan 'APN' 'POL' 'SGN' 'LP' 'VISrl' 'PO' 'LGd' 'MGm' 'SUB' 'VISp' 'PoT' 'Eth' 'VISpm' 'MB' 'VISam']
754312389	2019-10-03T00:00:00Z	719828690	brain_observatory_1.1	140	M	wt/wt	502	2220	6	['APN' 'POL' 'LP' 'DG' 'CA1' 'VISam' nan 'LGd' 'HPF' 'CA3' 'VISpm' 'VISp' 'CA2' 'VISl' 'grey' 'TH' 'VISal' 'VISrl']
754829445	2019-10-03T00:00:00Z	726298253	brain_observatory_1.1	141	M	wt/wt	832	1851	5	['PoT' 'LP' 'LGd' 'CA3' 'DG' 'CA1' 'VISp' nan 'VPM' 'CA2' 'VISrl' 'PO' 'Eth' 'TH' 'VISpm' 'APN' 'POL' 'VISam']
755434585	2019-10-03T00:00:00Z	730760270	brain_observatory_1.1	100	M	Vip-IRES-Cre/wt;Ai32(RCL-ChR2(H134R)_EYFP)/wt	650	2220	6	['grey' 'VISrl' nan 'MGv' 'MGd' 'TH' 'LGd' 'CA3' 'DG' 'CA1' 'VISal' 'VISl' 'APN' 'LP' 'MB' 'VISpm' 'SGN' 'ProS' 'VISp' 'SCig' 'PPT' 'NOT' 'VISam']
756029989	2019-10-03T00:00:00Z	734865738	brain_observatory_1.1	96	M	Sst-IRES-Cre/wt;Ai32(RCL-ChR2(H134R)_EYFP)/wt	684	2214	6	['TH' 'DG' 'CA3' 'CA1' 'VISl' nan 'PO' 'Eth' 'LP' 'VISpm' 'VISrl' 'VPM' 'LGd' 'CA2' 'VISal' 'POL' 'APN' 'MB' 'SCig' 'POST' 'SUB' 'VISp' 'VISam']
757216464	2019-10-03T00:00:00Z	733457989	brain_observatory_1.1	105	M	wt/wt	959	2225	6	['LP' 'DG' 'CA3' 'CA1' 'VISrl' nan 'PO' 'LGd' 'HPF' 'VISal' 'TH' 'LGv' 'VISl' 'MGm' 'SGN' 'ProS' 'SUB' 'VISp' 'Eth' 'APN' 'VIS' 'MRN' 'MB' 'NOT' 'VISam']
757970808	2019-10-03T00:00:00Z	730756780	brain_observatory_1.1	106	M	wt/wt	773	1853	5	['grey' 'DG' 'CA3' 'CA1' 'VISli' nan 'MGd' 'SGN' 'LP' 'TH' 'ProS' 'VISp' 'VISrl' 'VPM' 'LGd' 'VISal' 'MRN' 'MB' 'PPT' 'OP' 'NOT' 'SUB' 'VISam']
758798717	2019-10-03T00:00:00Z	735109609	brain_observatory_1.1	102	M	Sst-IRES-Cre/wt;Ai32(RCL-ChR2(H134R)_EYFP)/wt	593	1486	4	['MGv' 'MGd' 'TH' 'DG' 'CA1' 'VISal' nan 'SGN' 'LP' 'SUB' 'VISp' 'APN' 'MB' 'VISpm' 'PPT' 'OP' 'NOT' 'HPF' 'ProS' 'VISam']
759883607	2019-10-03T00:00:00Z	740268986	brain_observatory_1.1	113	M	wt/wt	483	1489	4	['MB' 'SCig' 'PPT' 'NOT' 'SUB' 'ProS' 'CA1' 'VISam' nan 'MGm' 'MGv' 'TH' 'LGd' 'CA3' 'DG' 'VISal' 'APN' 'VISp' 'POL' 'VISpm']
760345702	2019-10-03T00:00:00Z	739783171	brain_observatory_1.1	103	M	Pvalb-IRES-Cre/wt;Ai32(RCL-ChR2(H134R)_EYFP)/wt	501	1862	5	['MB' 'TH' 'PP' 'PIL' 'DG' 'CA3' 'CA1' 'VISal' nan 'grey' 'CA2' 'VISl' 'LGd' 'VISp' 'LP' 'VISpm' 'APN' 'VISam']
760693773	2019-10-03T00:00:00Z	738651054	brain_observatory_1.1	110	F	Sst-IRES-Cre/wt;Ai32(RCL-ChR2(H134R)_EYFP)/wt	826	2233	6	['grey' 'VISrl' nan 'VISal' 'VISp' 'VISpm' 'VISam']
761418226	2019-10-03T00:00:00Z	742714475	brain_observatory_1.1	119	M	wt/wt	712	2230	6	['grey' 'CA3' 'CA2' 'CA1' 'VISal' nan 'LGd' 'HPF' 'DG' 'VISp' 'TH' 'Eth' 'LP' 'VISpm' 'APN' 'MB' 'VISrl' 'POL' 'ZI' 'LGv' 'IGL']
762120172	2019-10-03T00:00:00Z	745276236	brain_observatory_1.1	100	M	Vip-IRES-Cre/wt;Ai32(RCL-ChR2(H134R)_EYFP)/wt	717	1860	5	['grey' 'VISal' nan 'VISl' 'VISp' 'VIS' 'VISam']
762602078	2019-10-03T00:00:00Z	744915204	brain_observatory_1.1	110	M	Sst-IRES-Cre/wt;Ai32(RCL-ChR2(H134R)_EYFP)/wt	531	2233	6	['MB' 'APN' 'NOT' 'DG' 'CA1' 'VISam' nan 'VISrl' 'LGv' 'CA3' 'VIS' 'SGN' 'LP' 'POST' 'SUB' 'VISp' 'PPT' 'HPF' 'ProS' 'VISmmp']
763673393	2019-10-03T00:00:00Z	742602892	brain_observatory_1.1	126	M	wt/wt	629	2227	6	['CA3' 'CA2' 'CA1' 'VISl' nan 'APN' 'MB' 'DG' 'VISam' 'Eth' 'TH' 'LP' 'POL' 'LGd' 'VISp' 'ZI' 'LGv' 'VIS' 'VISrl']
766640955	2019-10-03T00:00:00Z	744912849	functional_connectivity	133	M	wt/wt	842	2233	6	['MB' 'APN' 'NOT' 'DG' 'CA1' 'VISam' nan 'PF' 'TH' 'LP' 'VISmma' 'VISp' 'MGd' 'CA3' 'VISl' 'VPM' 'LGd' 'VISal' 'VISrl']
767871931	2019-10-03T00:00:00Z	753795610	functional_connectivity	135	M	wt/wt	713	2231	6	['MRN' 'APN' 'MB' 'DG' 'CA1' 'VISrl' nan 'VISam' 'PO' 'LP' 'VISpm' 'MGd' 'SGN' 'ProS' 'SUB' 'VISp' 'CA3' 'VISli' 'LT' 'TH' 'VISal']
768515987	2019-10-03T00:00:00Z	754477358	functional_connectivity	136	M	wt/wt	802	2217	6	['MB' 'APN' 'NOT' 'DG' 'CA1' 'VISam' nan 'Eth' 'LP' 'POL' 'TH' 'VISmma' 'ProS' 'VISp' 'CA3' 'CA2' 'VISl' 'MGm' 'MGv' 'MGd' 'LGd' 'VISal' 'RPF' 'VISrl']
771160300	2019-10-03T00:00:00Z	754488979	functional_connectivity	142	M	wt/wt	930	2230	6	['SCig' 'PPT' 'NOT' 'SUB' 'ProS' 'CA1' 'VISam' nan 'APN' 'MB' 'DG' 'VISpm' 'LP' 'VISp' 'CA3' 'CA2' 'VISli' 'ZI' 'IntG' 'IGL' 'LGd' 'VISal' 'OP' 'VIS']
771990200	2019-10-03T00:00:00Z	756578435	functional_connectivity	108	M	wt/wt	546	2229	6	['APN' 'MB' 'DG' 'CA1' 'VISam' nan 'PO' 'LP' 'VISpm' 'LGd' 'TH' 'ProS' 'VISp' 'CA3' 'CA2' 'VISli' 'VISal' 'POL' 'VISrl']
773418906	2019-10-03T00:00:00Z	757329624	brain_observatory_1.1	124	F	Pvalb-IRES-Cre/wt;Ai32(RCL-ChR2(H134R)_EYFP)/wt	546	2232	6	['PPT' 'NOT' 'SUB' 'ProS' 'CA1' 'VISam' nan 'APN' 'DG' 'VISmmp' 'MB' 'SCig' 'HPF' 'POST' 'VISp' 'CA3' 'CA2' 'VISal' 'MGv' 'MGd' 'TH' 'VISrl']
774875821	2019-10-03T00:00:00Z	759711152	functional_connectivity	114	M	wt/wt	649	2233	6	['APN' 'LP' 'DG' 'CA1' 'VISrl' nan 'MGv' 'MGd' 'CA3' 'VISal' 'VISl' 'VISp' 'MB' 'VISmma' 'SCig' 'NOT' 'HPF' 'SUB' 'ProS' 'VISam']
778240327	2019-10-03T00:00:00Z	760938797	functional_connectivity	120	M	wt/wt	784	2234	6	['APN' 'POL' 'LP' 'DG' 'CA1' 'VISrl' nan 'ZI' 'IntG' 'IGL' 'TH' 'LGd' 'CA3' 'VISal' 'grey' 'CA2' 'VISl' 'VISp' 'VISpm' 'NOT' 'HPF' 'SUB' 'ProS' 'VISam']
778998620	2019-10-03T00:00:00Z	759674770	functional_connectivity	121	M	wt/wt	793	2229	6	['APN' 'POL' 'LP' 'DG' 'CA3' 'CA1' 'VISrl' nan 'ZI' 'MB' 'LGv' 'VISal' 'CA2' 'VISl' 'SGN' 'SUB' 'VISp' 'VISpm' 'NOT' 'VISam']
779839471	2019-10-03T00:00:00Z	760960653	functional_connectivity	122	M	wt/wt	863	2220	6	['APN' 'LP' 'MB' 'DG' 'CA1' 'VISrl' nan 'TH' 'LGd' 'CA3' 'VIS' 'CA2' 'ProS' 'VISp' 'POL' 'VISpm' 'PPT' 'OP' 'NOT' 'HPF' 'SUB' 'VISam']
781842082	2019-10-03T00:00:00Z	760946813	functional_connectivity	126	M	wt/wt	833	2232	6	['APN' 'LP' 'DG' 'CA1' 'VISrl' nan 'MGm' 'TH' 'MGv' 'LGd' 'CA3' 'CA2' 'VISal' 'grey' 'SGN' 'PRE' 'POST' 'SUB' 'HPF' 'VISp' 'POL' 'MB' 'VISmma' 'NOT' 'VISam']
786091066	2019-10-03T00:00:00Z	763884103	functional_connectivity	111	F	Sst-IRES-Cre/wt;Ai32(RCL-ChR2(H134R)_EYFP)/wt	700	2232	6	['APN' 'MB' 'DG' 'CA1' 'VISrl' nan 'MGd' 'CA3' 'VISal' 'CA2' 'grey' 'SUB' 'VISp' 'PPT' 'NOT' 'ProS' 'VISpm' 'SCig' 'VISam']
787025148	2019-10-03T00:00:00Z	763236014	functional_connectivity	114	M	Sst-IRES-Cre/wt;Ai32(RCL-ChR2(H134R)_EYFP)/wt	696	2231	6	['SCiw' 'SCig' 'PPT' 'NOT' 'DG' 'SUB' 'ProS' 'CA1' 'VISam' nan 'APN' 'LP' 'VISrl' 'grey' 'MB' 'PP' 'TH' 'MGv' 'CA3' 'VISal' 'VISli' 'POL' 'SGN' 'VISp' 'VIS']
789848216	2019-10-03T00:00:00Z	763808604	functional_connectivity	119	M	Sst-IRES-Cre/wt;Ai32(RCL-ChR2(H134R)_EYFP)/wt	415	2230	6	['grey' 'CA3' 'CA2' 'CA1' 'VISal' nan 'LP' 'LD' 'VISrl' 'POL' 'APN' 'TH' 'DG' 'VISam' 'VISmmp' 'VISp' 'CP' 'VISl']
791319847	2019-10-03T00:00:00Z	769360779	brain_observatory_1.1	116	M	Vip-IRES-Cre/wt;Ai32(RCL-ChR2(H134R)_EYFP)/wt	555	2229	6	['APN' 'DG' 'CA1' 'VISam' nan 'LP' 'TH' 'VISpm' 'POL' 'VISrl' 'CA3' 'CA2' 'VISl' 'LGd' 'ProS' 'SUB' 'VISp' 'ZI' 'LGv' 'VISal']
793224716	2019-10-03T00:00:00Z	769319624	functional_connectivity	120	M	wt/wt	781	2229	6	['APN' 'NOT' 'MB' 'DG' 'CA1' 'VIS' nan 'Eth' 'LP' 'SGN' 'SUB' 'VISp' 'CA3' 'CA2' 'VISal' 'grey' 'MRN' 'VISrl']
794812542	2019-10-03T00:00:00Z	774672366	functional_connectivity	120	F	Sst-IRES-Cre/wt;Ai32(RCL-ChR2(H134R)_EYFP)/wt	1005	2229	6	['MB' 'APN' 'DG' 'CA1' 'VISrl' nan 'PIL' 'MGm' 'MGv' 'MGd' 'CA3' 'VISal' 'CA2' 'VISl' 'LP' 'POST' 'SUB' 'VISp' 'SCig' 'NOT' 'HPF' 'ProS' 'VISam' 'POL' 'VISpm']
797828357	2019-10-03T00:00:00Z	776061251	brain_observatory_1.1	107	M	Pvalb-IRES-Cre/wt;Ai32(RCL-ChR2(H134R)_EYFP)/wt	611	2232	6	['PPT' 'MB' 'APN' 'NOT' 'HPF' 'ProS' 'CA1' 'VISam' nan 'POL' 'LP' 'DG' 'VISrl' 'ZI' 'IntG' 'IGL' 'CA3' 'VISal' 'CA2' 'VISl' 'SUB' 'VISp' 'VISpm']
798911424	2019-10-03T00:00:00Z	775876828	brain_observatory_1.1	110	F	Vip-IRES-Cre/wt;Ai32(RCL-ChR2(H134R)_EYFP)/wt	825	2233	6	['APN' 'TH' 'Eth' 'LP' 'DG' 'HPF' 'CA3' 'CA1' 'VISrl' nan 'LGv' 'CA2' 'VISal' 'VISl' 'ProS' 'SUB' 'VISp' 'VISam' 'MB' 'NOT']
799864342	2019-10-03T00:00:00Z	772616823	brain_observatory_1.1	129	M	wt/wt	604	2233	6	['APN' 'POL' 'LP' 'DG' 'CA1' 'VISrl' nan 'LGd' 'CA3' 'VISal' 'CA2' 'VISl' 'ProS' 'SUB' 'VISp' 'VISmma' 'VISam' 'COAa']
816200189	2019-10-03T00:00:00Z	791857608	functional_connectivity	128	F	Vip-IRES-Cre/wt;Ai32(RCL-ChR2(H134R)_EYFP)/wt	634	1857	5	['MRN' 'APN' 'MB' 'DG' 'CA1' 'VISam' nan 'LP' 'VISpm' 'SGN' 'SUB' 'VISp' 'CA3' 'VISl' 'VPM' 'RT' 'LGv' 'IGL' 'CA2' 'VIS']
819186360	2019-10-03T00:00:00Z	800249587	functional_connectivity	128	F	wt/wt	531	1696	5	['SCiw' 'SCig' 'NOT' 'MB' 'SCop' 'HPF' 'SUB' 'VISam' nan 'DG' 'CA1' 'VISpm' 'CA3' 'VISl' 'LP' 'LGd' 'VISrl' 'APN' 'POL']
819701982	2019-10-03T00:00:00Z	795770036	functional_connectivity	135	F	Vip-IRES-Cre/wt;Ai32(RCL-ChR2(H134R)_EYFP)/wt	585	1852	5	['MB' 'SCiw' 'SCig' 'PPT' 'NOT' 'SUB' 'ProS' 'CA1' 'VISam' nan 'DG' 'CA3' 'VISl' 'LGd' 'VISrl' 'APN' 'POL' 'SGN' 'LP' 'TH']
821695405	2019-10-03T00:00:00Z	800250057	functional_connectivity	134	F	wt/wt	474	1856	5	['LGv' 'TH' 'DG' 'CA3' 'CA1' 'ProS' 'VISl' nan 'grey' 'VISp' 'LP' 'VISpm' 'VISam' 'LGd' 'VISal']
829720705	2019-10-03T00:00:00Z	811322619	functional_connectivity	112	M	Pvalb-IRES-Cre/wt;Ai32(RCL-ChR2(H134R)_EYFP)/wt	529	1841	5	['SCig' 'SCop' 'SCsg' 'SCzo' 'POST' 'VISp' nan 'CA1' 'VISam' 'COApm' 'OLF' 'BMAa' 'CA3' 'DG' 'VISl' 'VISal' 'grey' 'VISrl']
831882777	2019-10-03T00:00:00Z	803390291	functional_connectivity	137	M	Sst-IRES-Cre/wt;Ai32(RCL-ChR2(H134R)_EYFP)/wt	657	2227	6	['grey' 'DG' 'CA1' 'VISrl' nan 'VISal' 'VISl' 'MB' 'SCig' 'POST' 'SUB' 'HPF' 'VISp' 'APN' 'NOT' 'ProS' 'VISpm' 'PPT' 'VISam']
835479236	2019-10-03T00:00:00Z	813701562	functional_connectivity	121	M	Vip-IRES-Cre/wt;Ai32(RCL-ChR2(H134R)_EYFP)/wt	582	1857	5	['LP' 'DG' 'CA1' 'VISmmp' nan 'SCiw' 'SCig' 'SCop' 'SCsg' 'SCzo' 'VISp' 'CA3' 'ProS' 'VISl' 'VISal' 'LGd' 'VISrl']
839068429	2019-10-03T00:00:00Z	817060751	functional_connectivity	129	F	Sst-IRES-Cre/wt;Ai32(RCL-ChR2(H134R)_EYFP)/wt	742	2298	6	['APN' 'LP' 'MB' 'DG' 'CA1' 'VISam' nan 'VISpm' 'ProS' 'SUB' 'VISp' 'CA3' 'VISl' 'VIS' 'LGd' 'TH' 'VISrl']
839557629	2019-10-03T00:00:00Z	821469666	functional_connectivity	115	M	Pvalb-IRES-Cre/wt;Ai32(RCL-ChR2(H134R)_EYFP)/wt	450	1853	5	['APN' 'NOT' 'MB' 'DG' 'CA1' 'VISam' nan 'VISpm' 'LGd' 'TH' 'ProS' 'VISp' 'VISl' 'CA3' 'CA2' 'VISal']
840012044	2019-10-03T00:00:00Z	820866121	functional_connectivity	116	M	Pvalb-IRES-Cre/wt;Ai32(RCL-ChR2(H134R)_EYFP)/wt	758	2298	6	['APN' 'DG' 'CA1' 'VISam' nan 'LP' 'VISpm' 'VISp' 'LGv' 'IGL' 'TH' 'CA3' 'VISl' 'MGv' 'MGd' 'VISrl']
847657808	2019-10-03T00:00:00Z	827809884	functional_connectivity	126	F	wt/wt	874	2298	6	['APN' 'NOT' 'DG' 'HPF' 'ProS' 'CA1' 'VISam' nan 'MB' 'VISpm' 'POST' 'SUB' 'VISp' 'CA3' 'VISl' 'MGd' 'TH' 'VISal' 'SGN' 'LP' 'VISrl']
