# Supplementary figures and images for: Contribution of behavioural variability to representational drift
Source: eLife journal article supplement (doi:10.7554/elife.77907), 2022-08-30

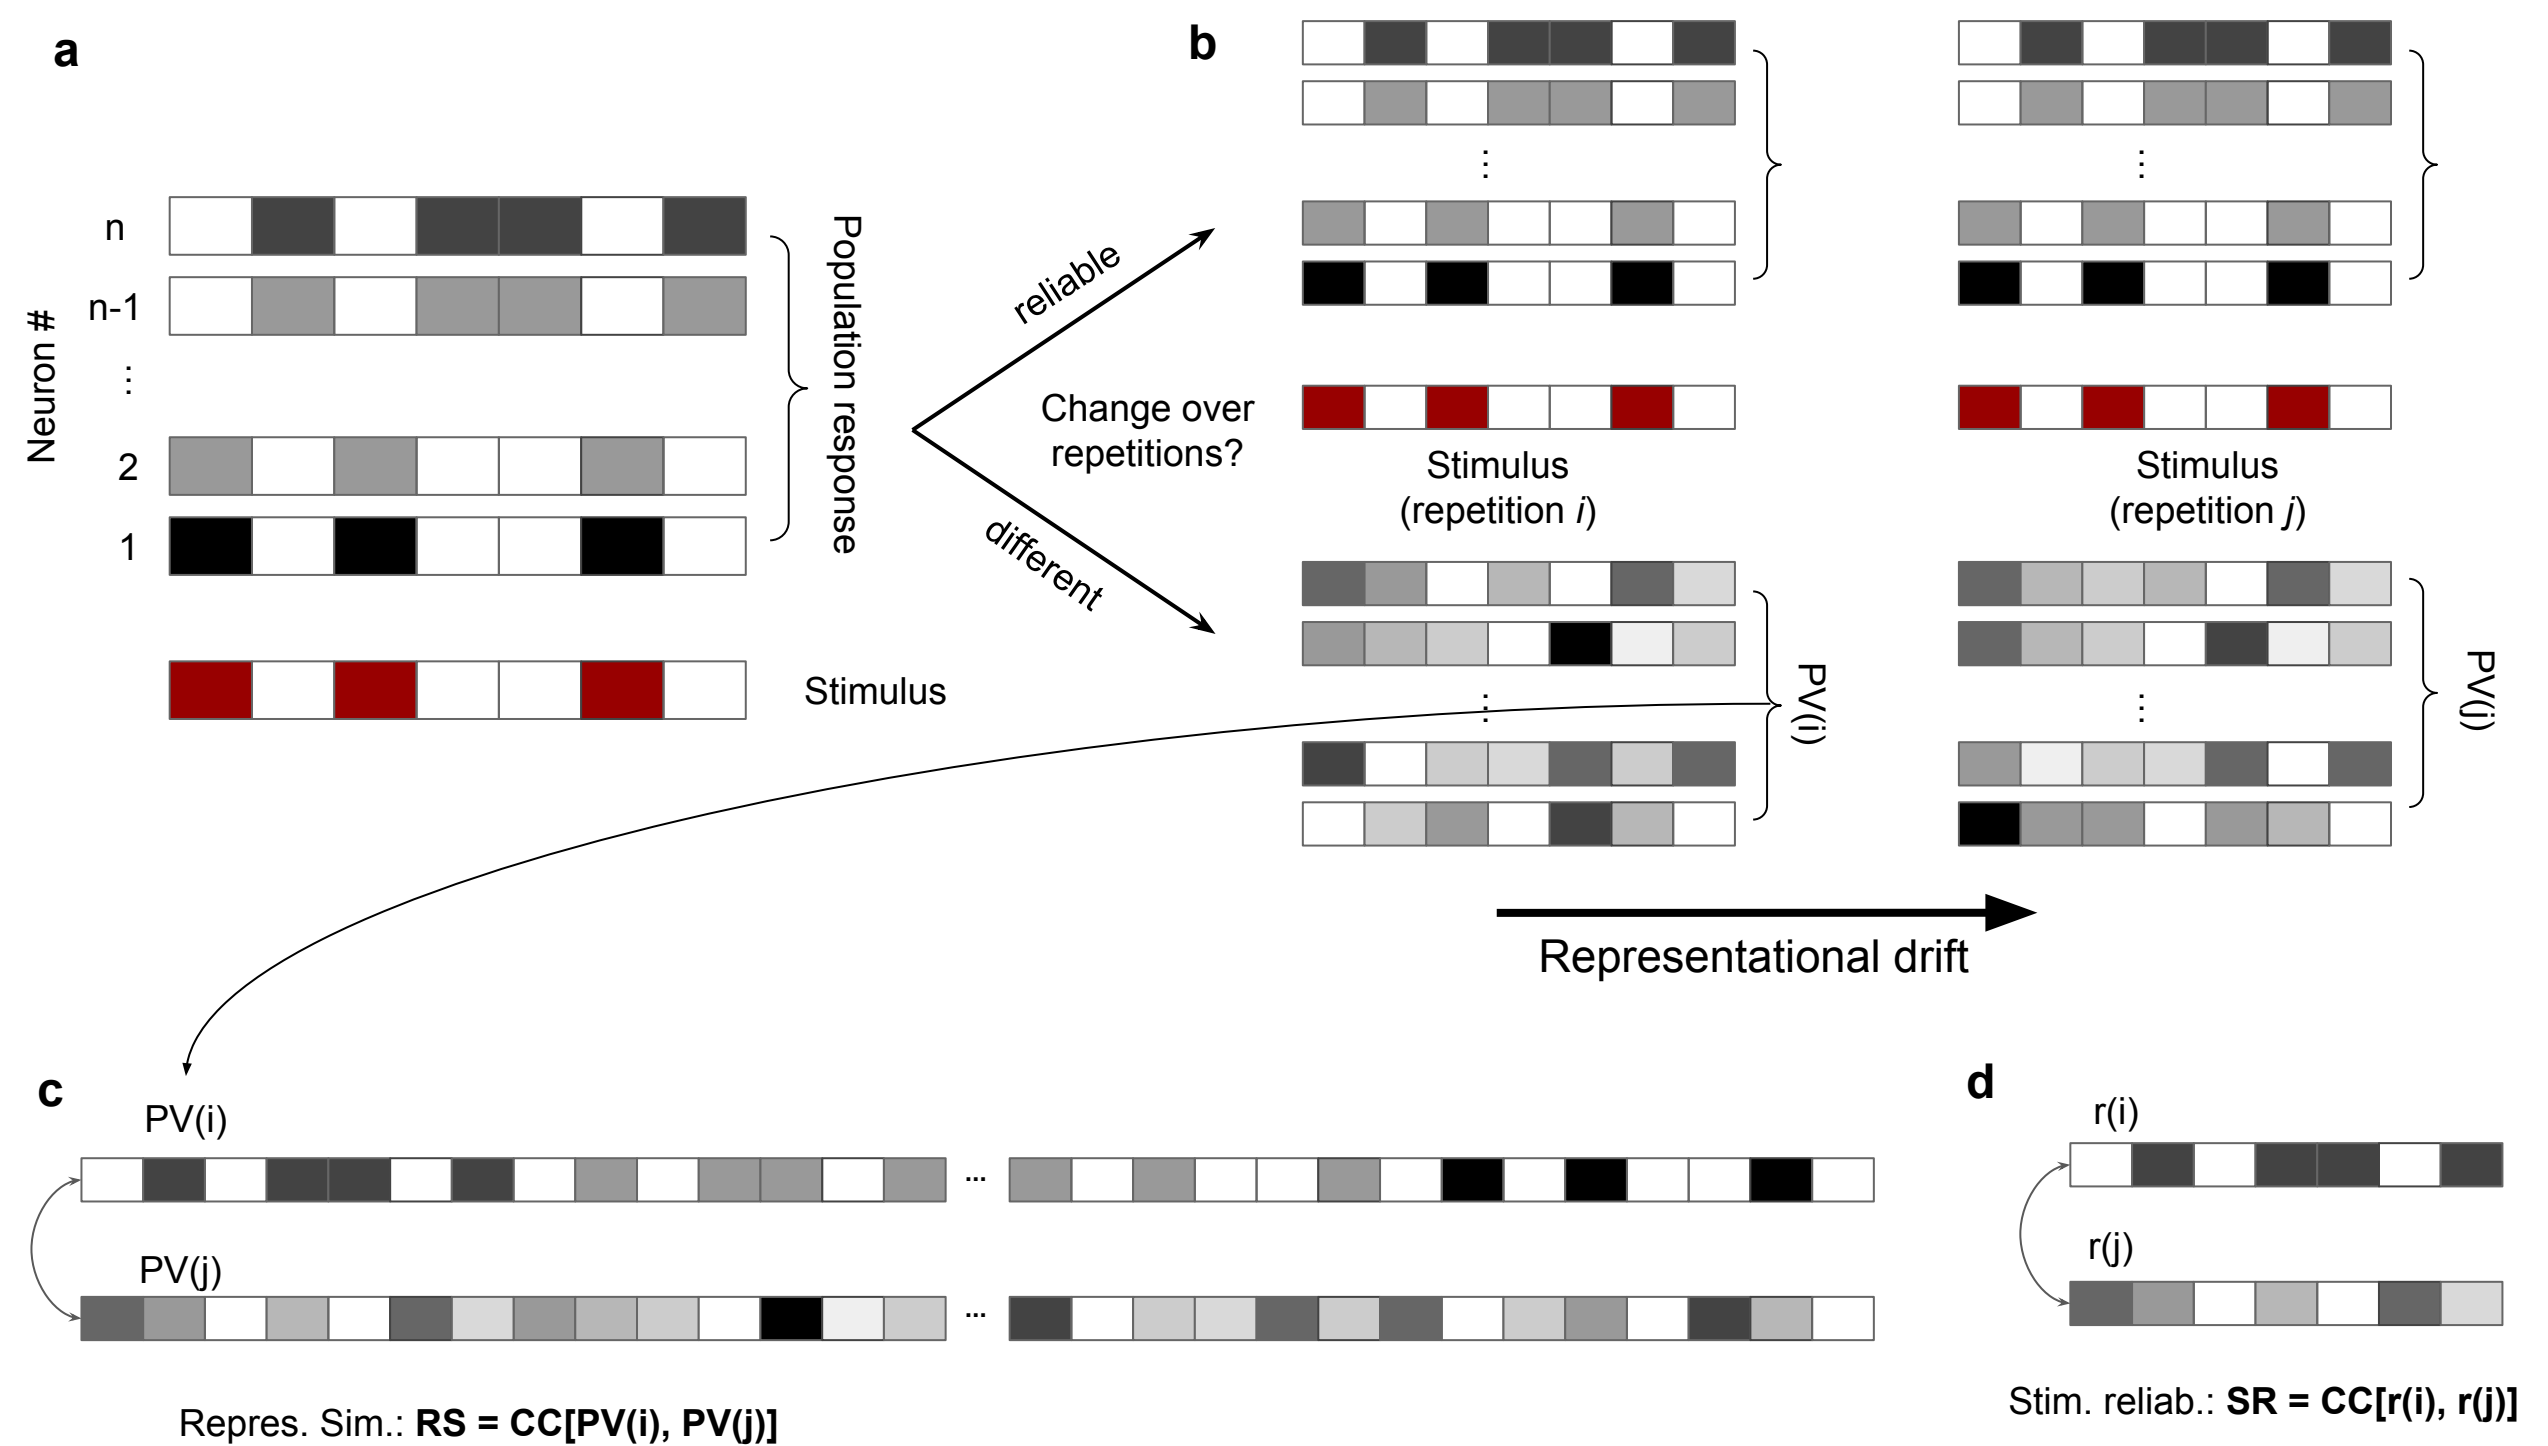

Supplement: supp [file elife-77907-supp-v1.zip › elife_poa_e77907_Figure_1_figure_supplement_1.pdf]

# Neuropixels dataset1

# Neuropixels dataset2

**a**

V1 units  
(other sessions)

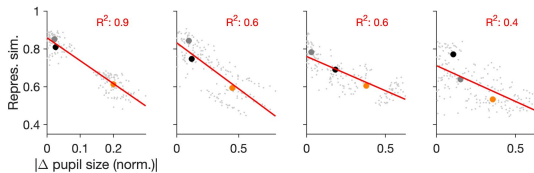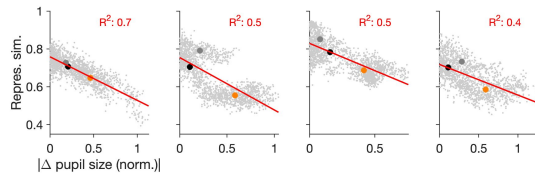

**b**

All units

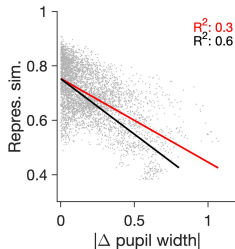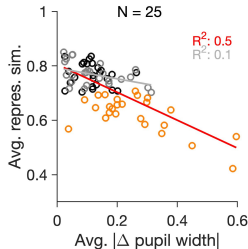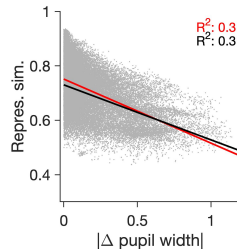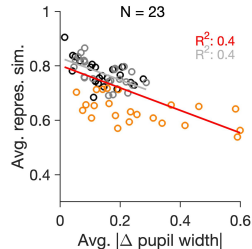

Supplement: supp [file elife-77907-supp-v1.zip › elife_poa_e77907_Figure_1_figure_supplement_2.pdf]

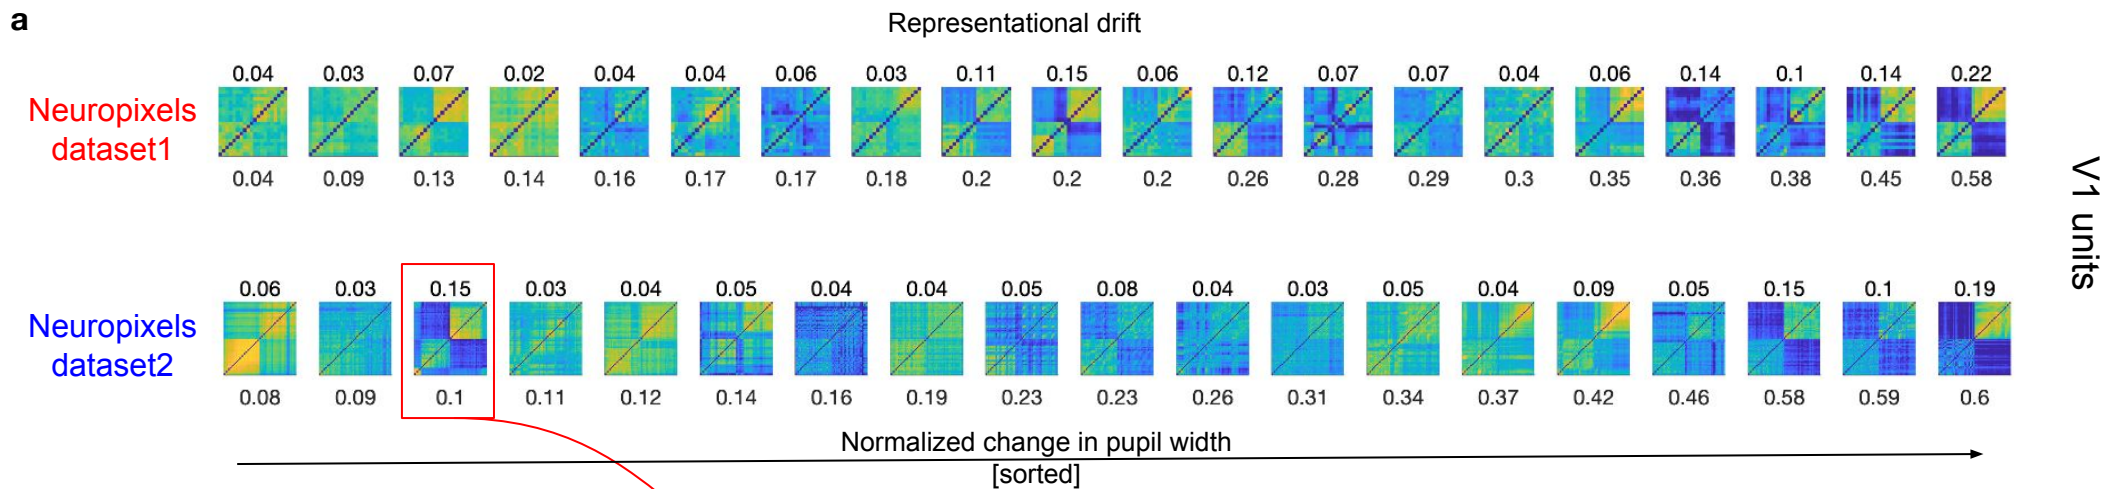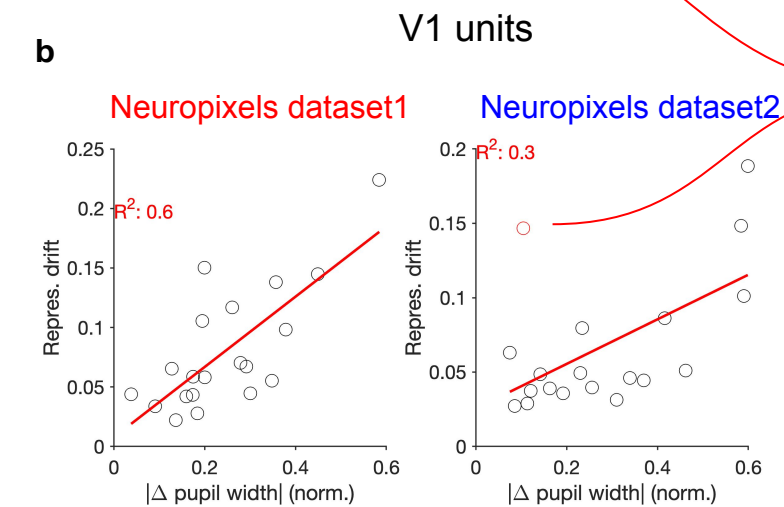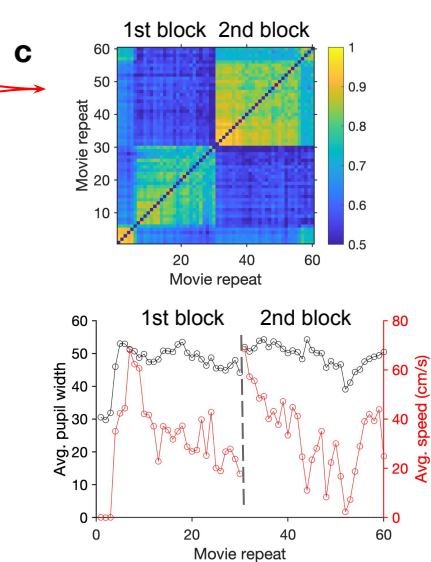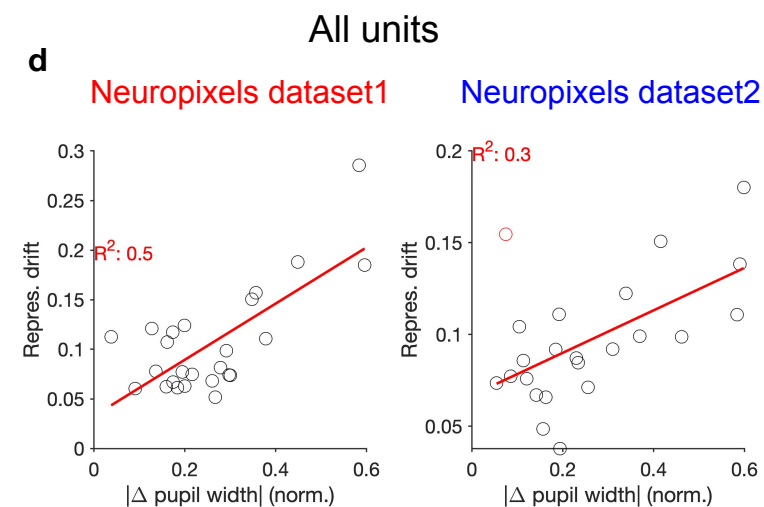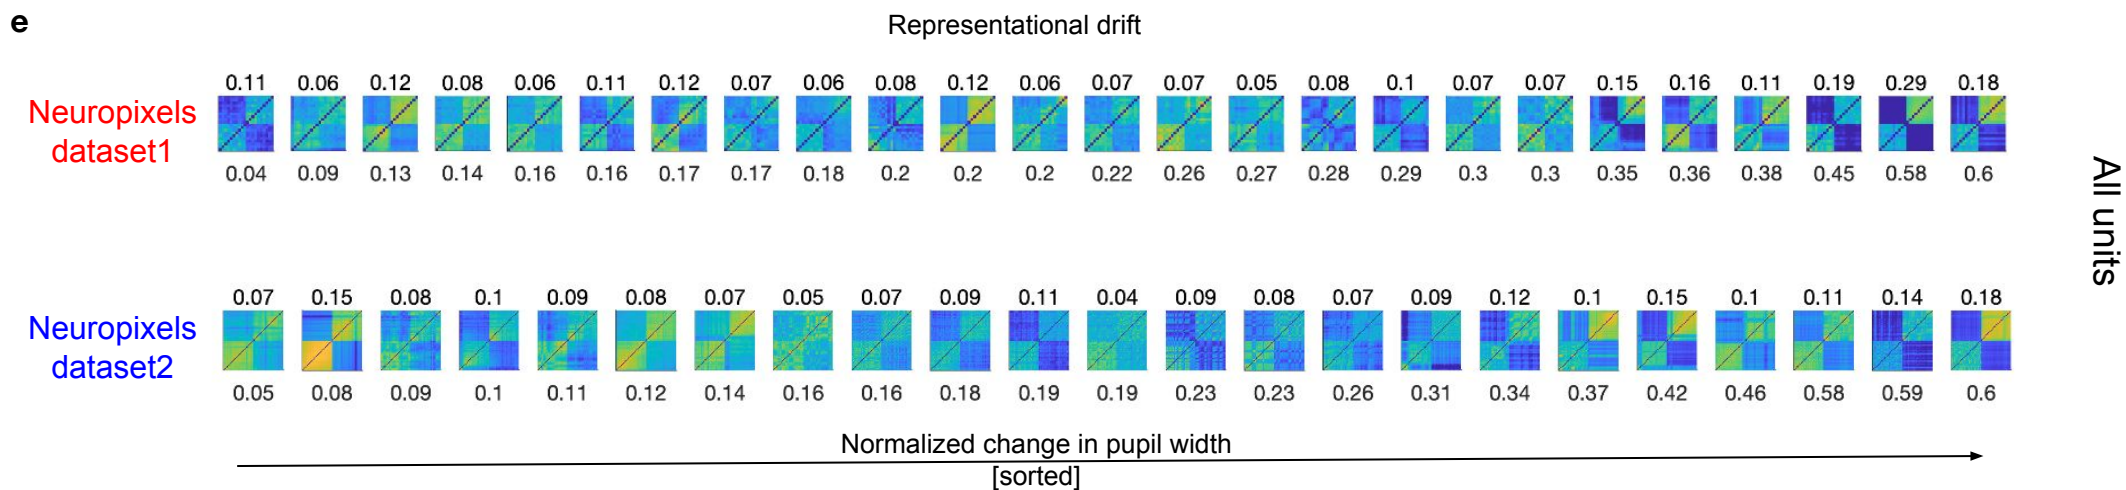

Supplement: supp [file elife-77907-supp-v1.zip › elife_poa_e77907_Figure_1_figure_supplement_5.pdf]

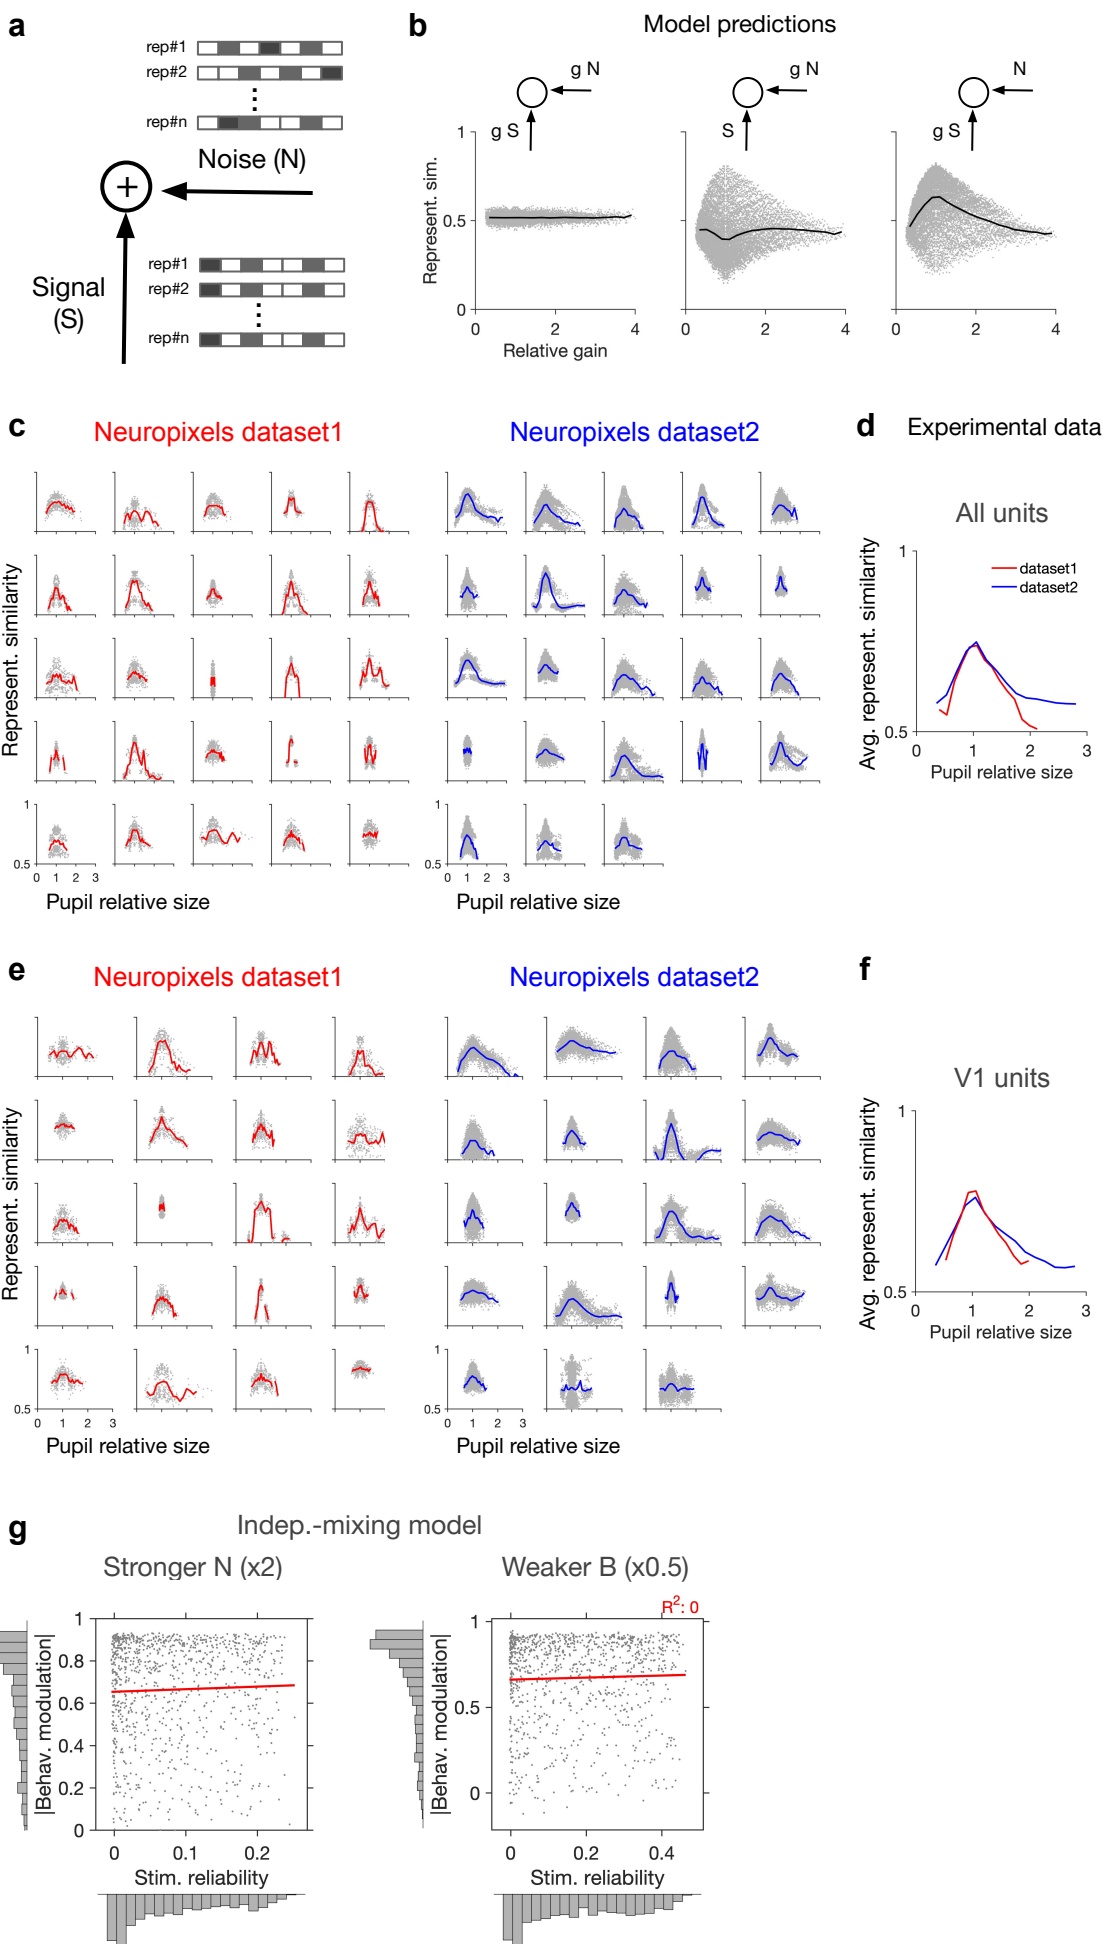

Supplement: supp [file elife-77907-supp-v1.zip › elife_poa_e77907_Figure_2_figure_supplement_1.pdf]

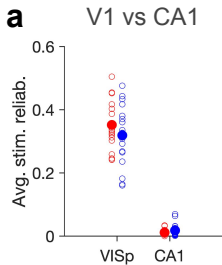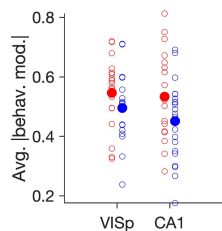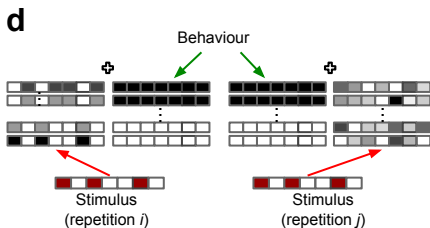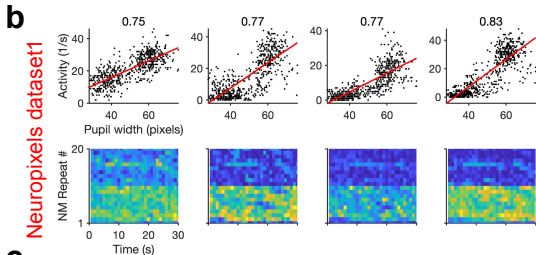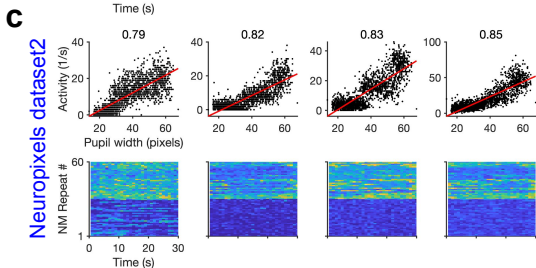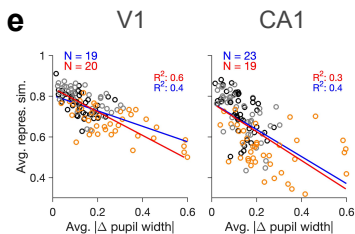

Supplement: supp [file elife-77907-supp-v1.zip › elife_poa_e77907_Figure_2_figure_supplement_3.pdf]

Neuropixels dataset1

**a**

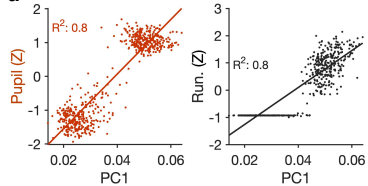

**b**

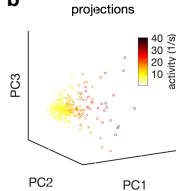

**c**

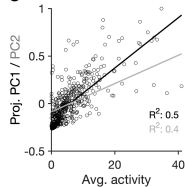

**d**

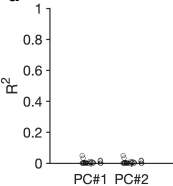

Neuropixels dataset2

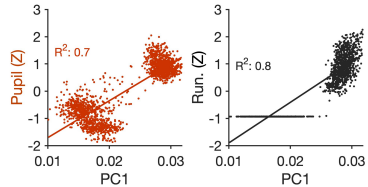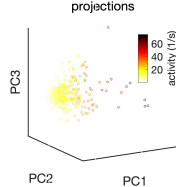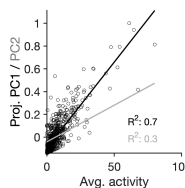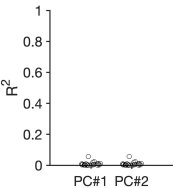

Supplement: supp [file elife-77907-supp-v1.zip › elife_poa_e77907_Figure_3_figure_supplement_1.pdf]

Neuropixels dataset1

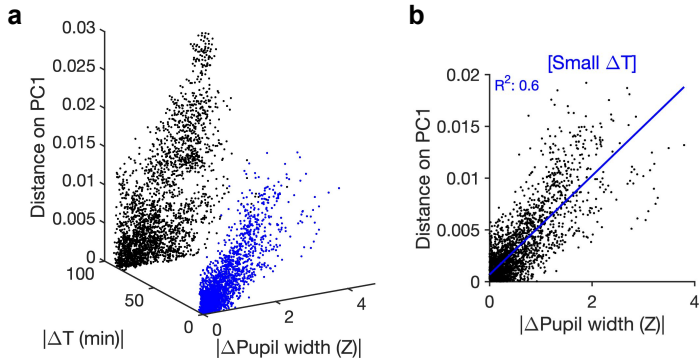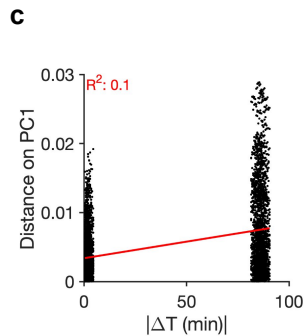

Neuropixels dataset2

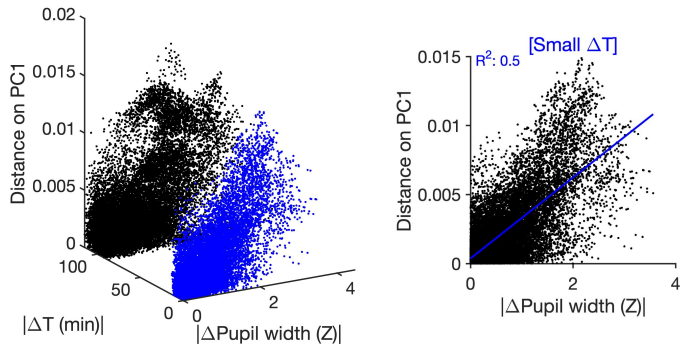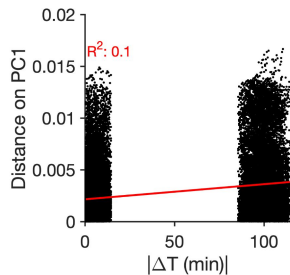

Supplement: supp [file elife-77907-supp-v1.zip › elife_poa_e77907_Figure_3_figure_supplement_2.pdf]

# Neuropixels dataset1

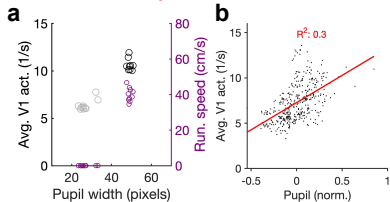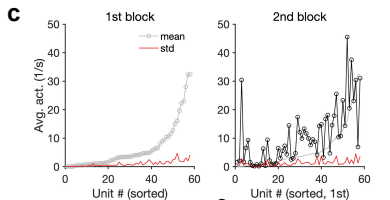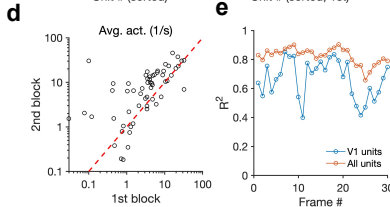

# Neuropixels dataset2

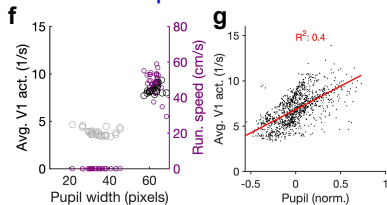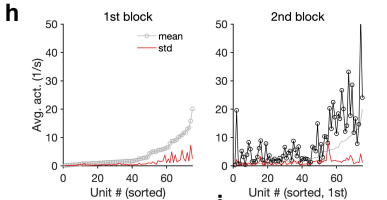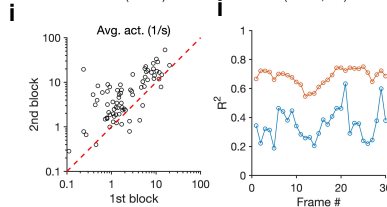

Supplement: supp [file elife-77907-supp-v1.zip › elife_poa_e77907_Figure_4_figure_supplement_1.pdf]

**a**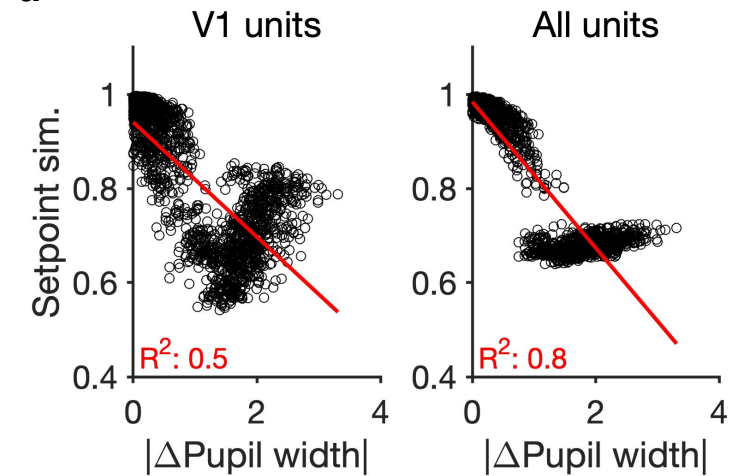**b**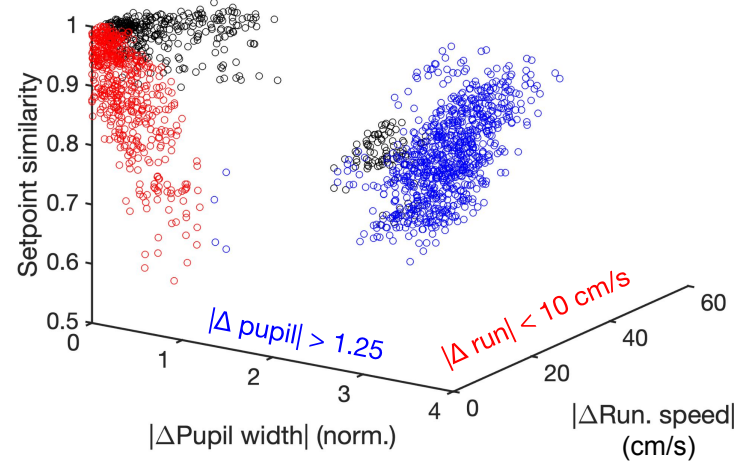**c**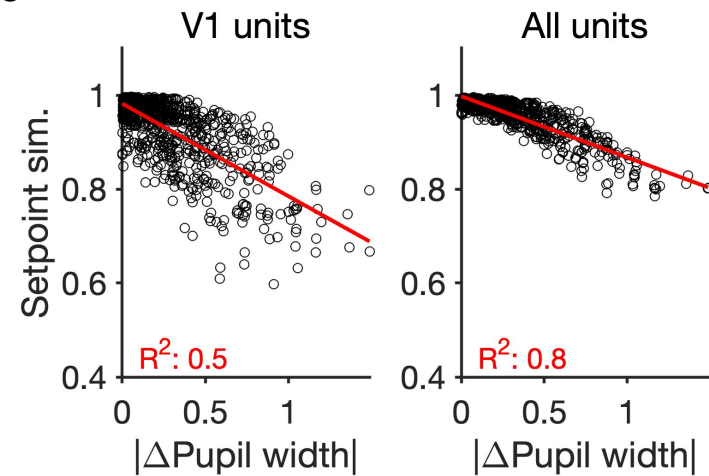**d**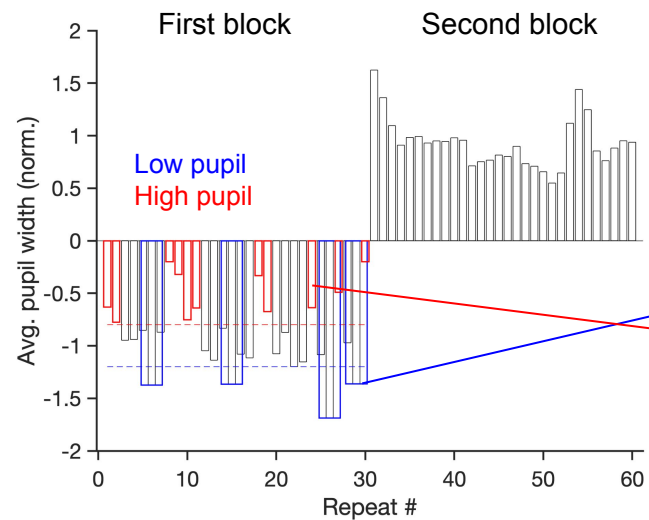**e**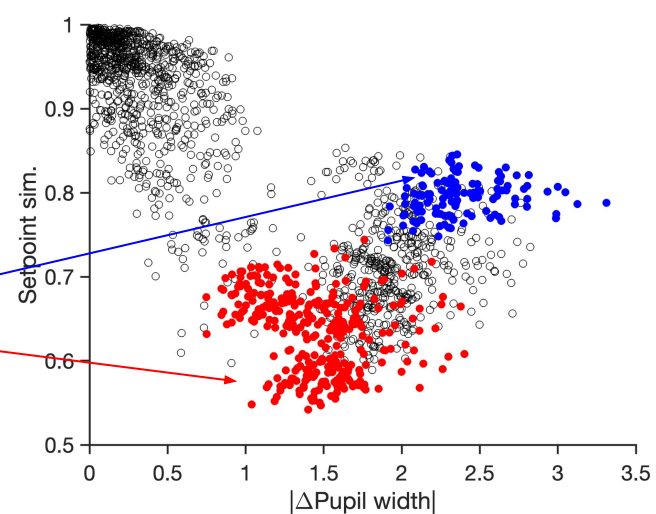**f**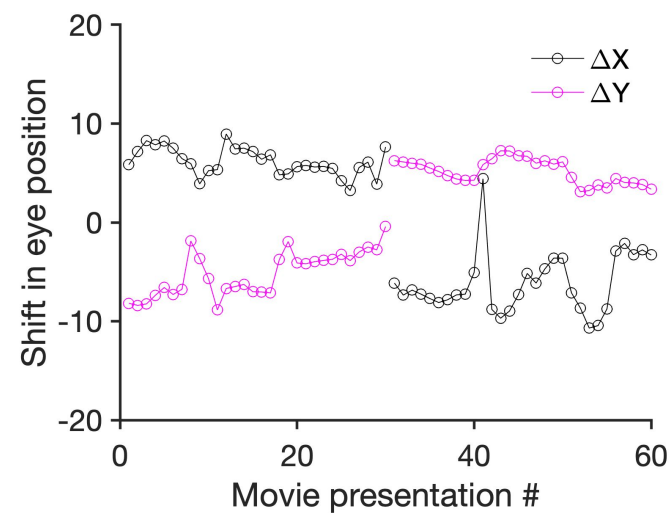

Supplement: supp [file elife-77907-supp-v1.zip › elife_poa_e77907_Figure_4_figure_supplement_2.pdf]

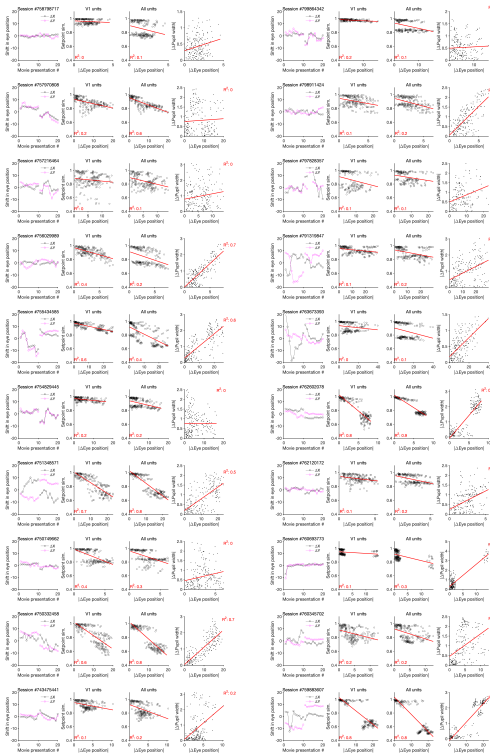

Supplement: supp [file elife-77907-supp-v1.zip › elife_poa_e77907_Figure_4_figure_supplement_3.pdf]

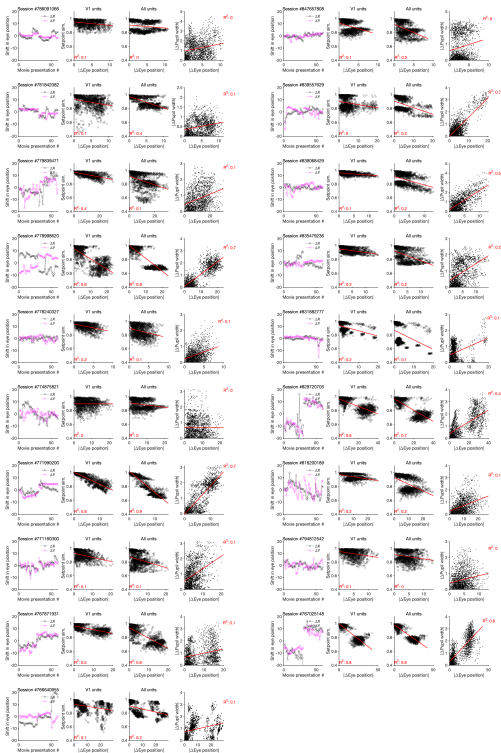

Supplement: supp [file elife-77907-supp-v1.zip › elife_poa_e77907_Figure_4_figure_supplement_4.pdf]

Neuropixels dataset1

**a**

**brain\_observatory\_1.1**

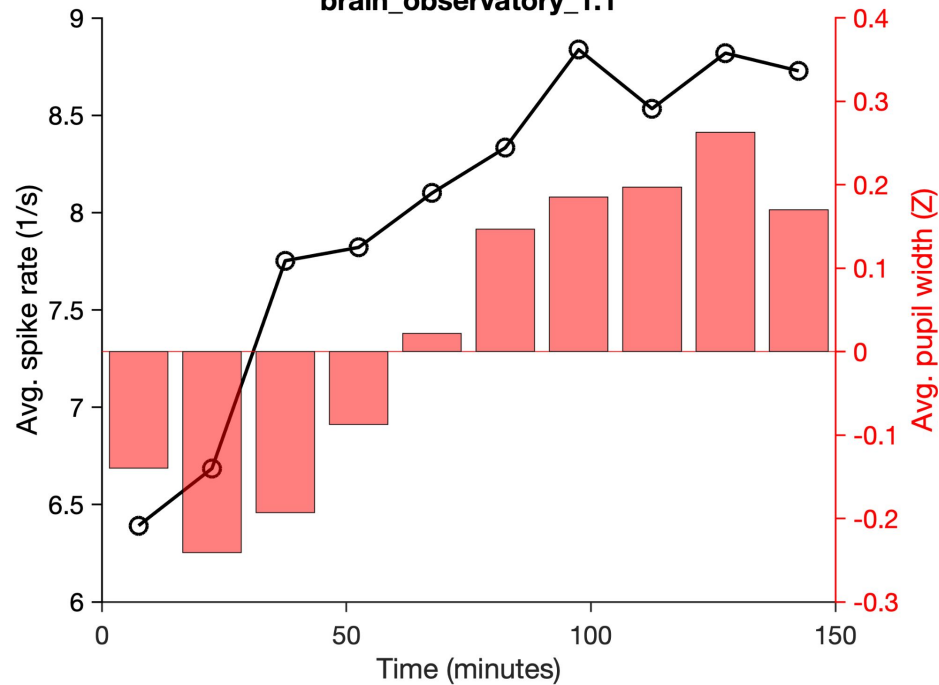

Neuropixels dataset2

**b**

**functional\_connectivity**

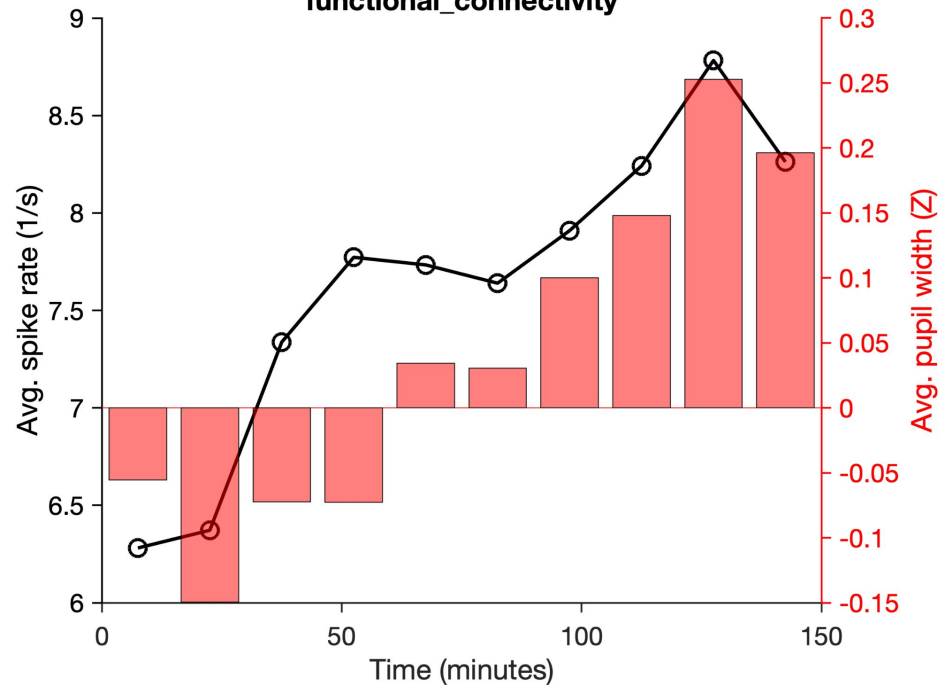

Supplement: supp [file elife-77907-supp-v1.zip › elife_poa_e77907_Figure_4_figure_supplement_5.pdf]

## Neuropixels dataset1

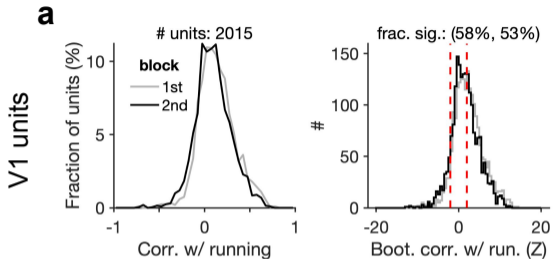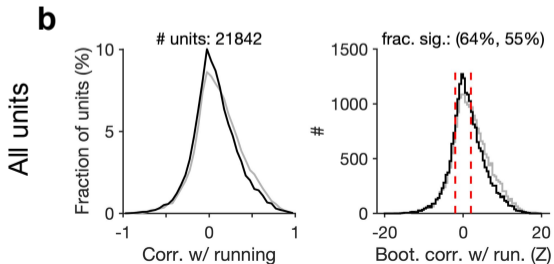

## Neuropixels dataset2

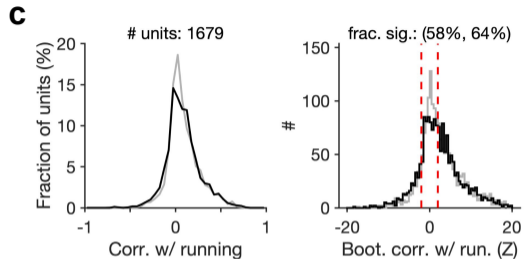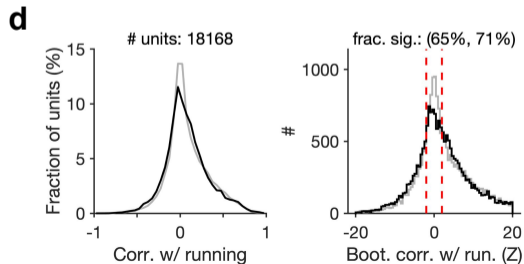

Supplement: supp [file elife-77907-supp-v1.zip › elife_poa_e77907_Figure_5_figure_supplement_1.pdf]

# Neuropixels dataset1

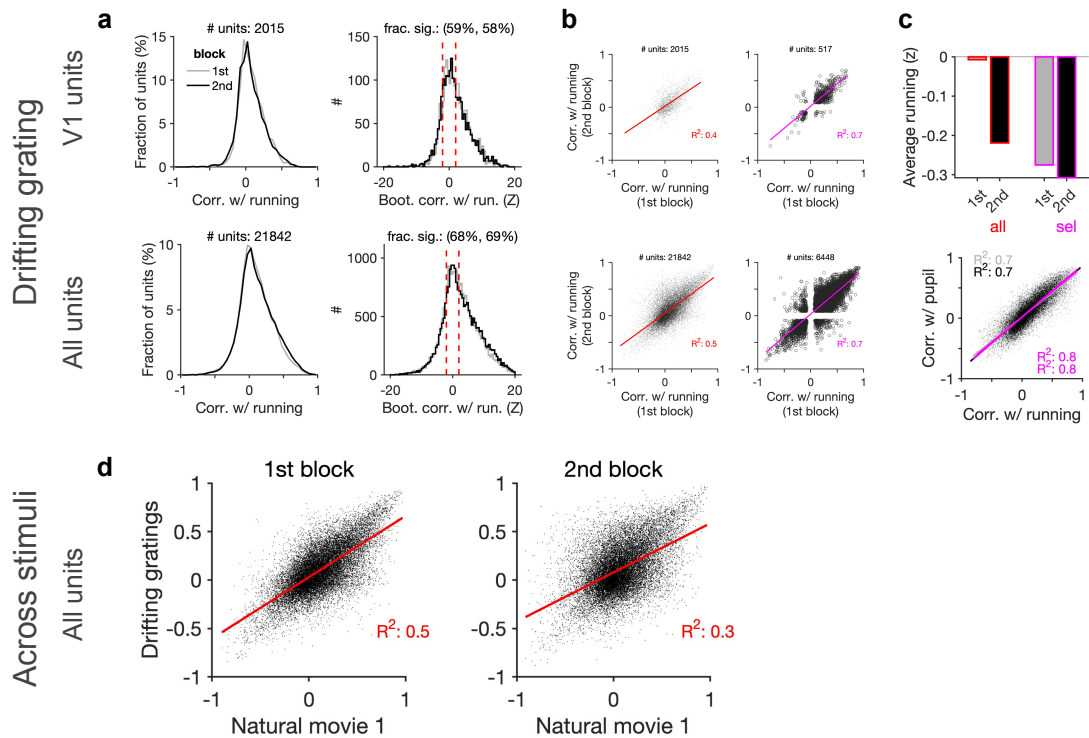

# Neuropixels dataset2

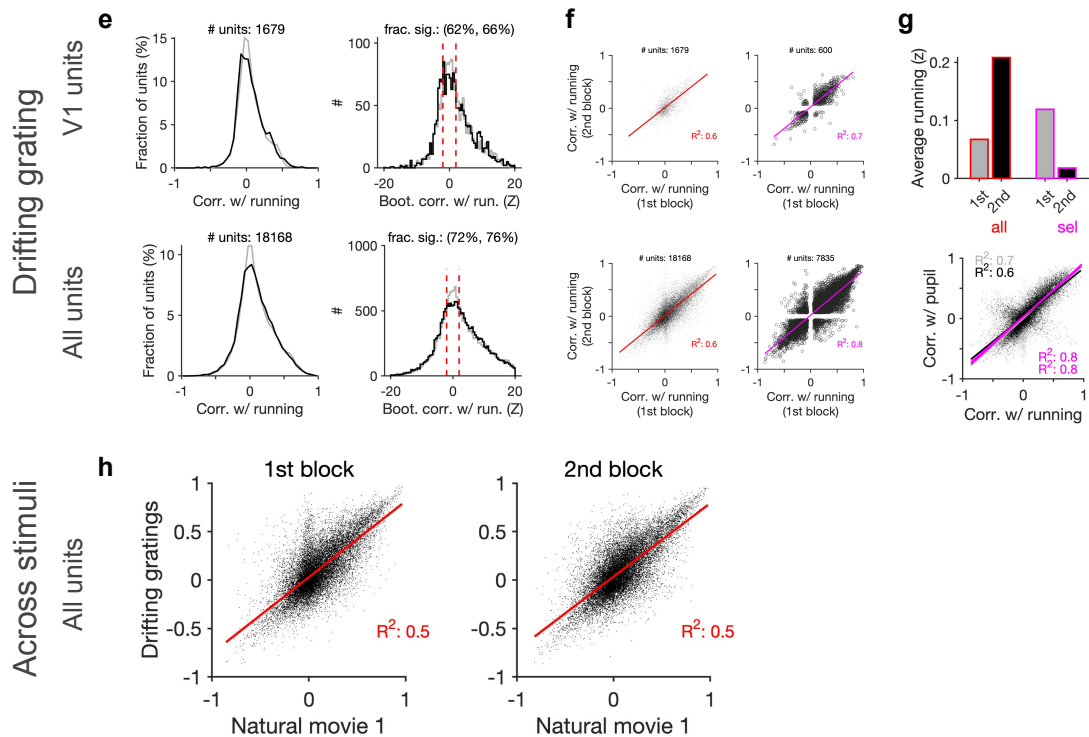

Supplement: supp [file elife-77907-supp-v1.zip › elife_poa_e77907_Figure_5_figure_supplement_2.pdf]

## Neuropixels dataset1

Behaviourally  
modulated units

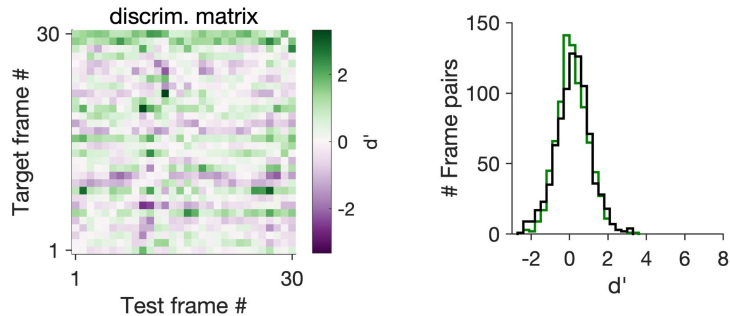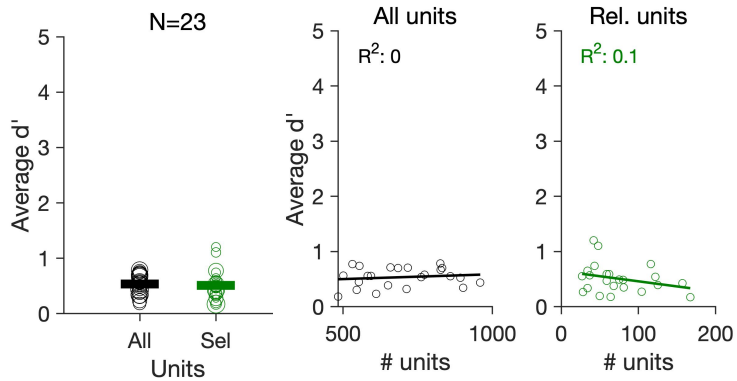

## Neuropixels dataset2

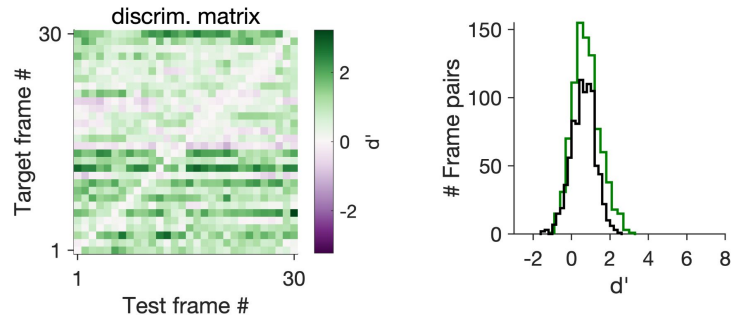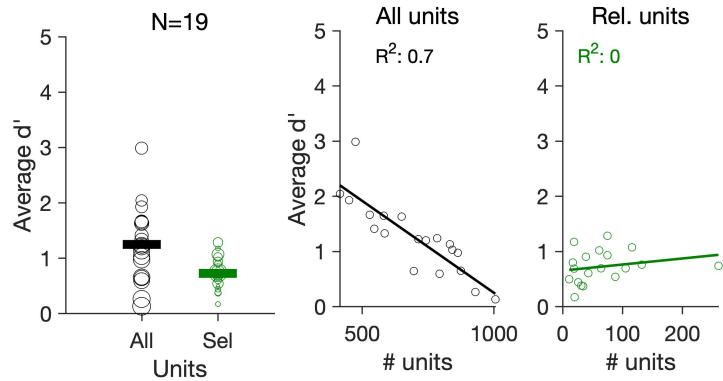

Supplement: supp [file elife-77907-supp-v1.zip › elife_poa_e77907_Figure_7_figure_supplement_1.pdf]

# Neuropixels dataset1

# Neuropixels dataset2

Example session

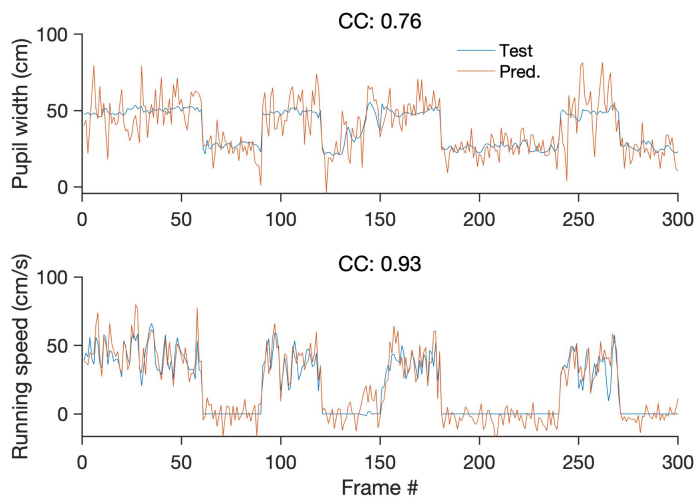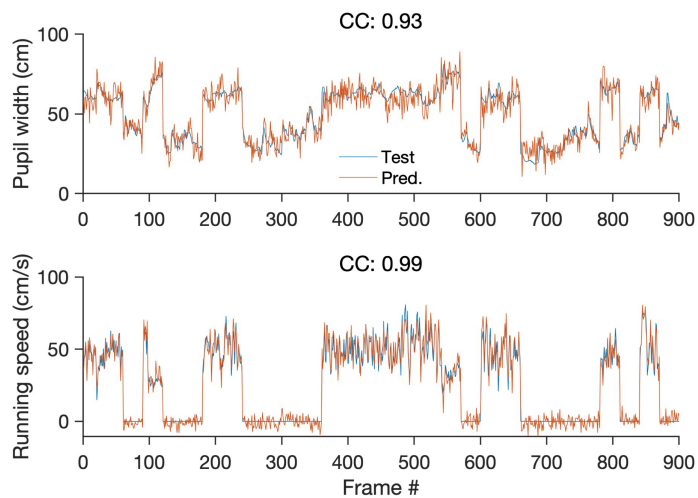

b

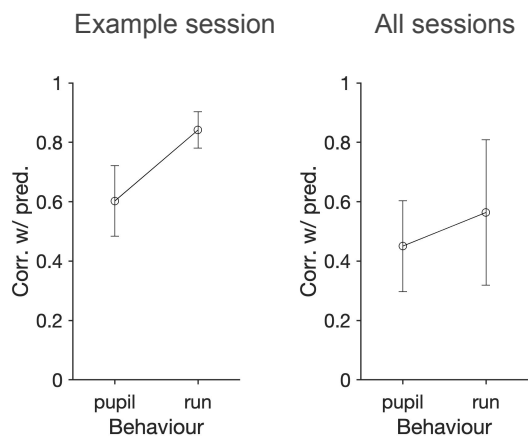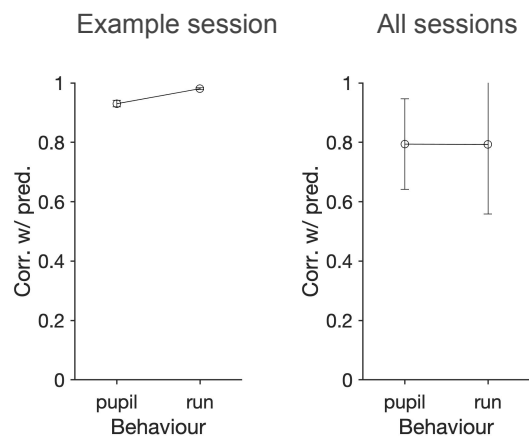

c

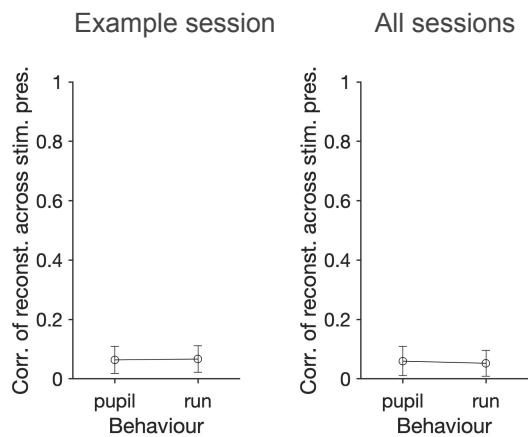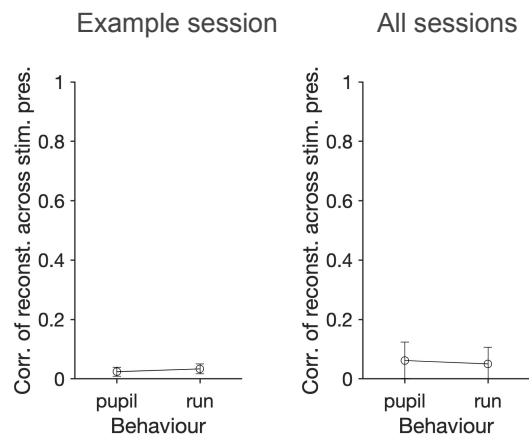

Supplement: supp [file elife-77907-supp-v1.zip › elife_poa_e77907_Figure_7_figure_supplement_2.pdf]
